# Supplementary material
Source: PubMed Central journal article supplement (PMC4634042)
Supplement: supp_pp.114.254045_254045SuppFigs1_3Tbls3_4.pdf [file supp_pp.114.254045_254045SuppFigs1_3Tbls3_4.pdf]

Supplemental Material: Klähn et al.

Supplemental Figure S1

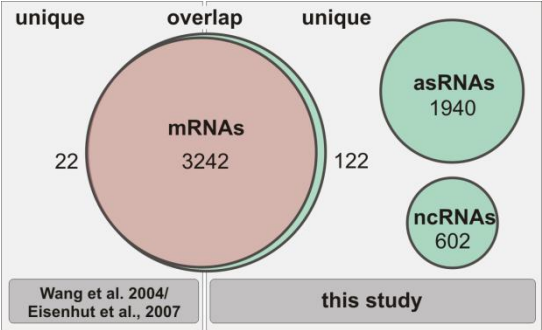

Figure S1: Overlap and additional features of the array design used here Mitschke et al. (2011) with arrays from Wang et al. (2004) and Eisenhut et al. (2007).

**Supplemental Figure S2**

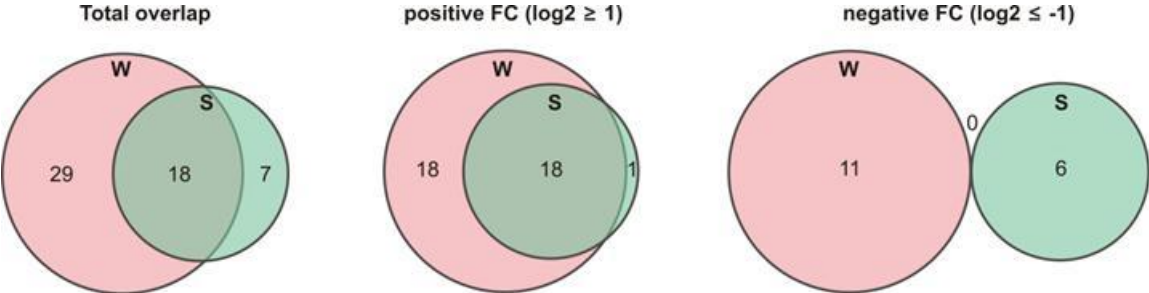

**Figure S2:** Overlap and differences in expression levels for protein-coding genes in our study (S – green circles) to Wang et al. (2004) (W-red circles) under HC conditions.

### Supplemental Figure S3

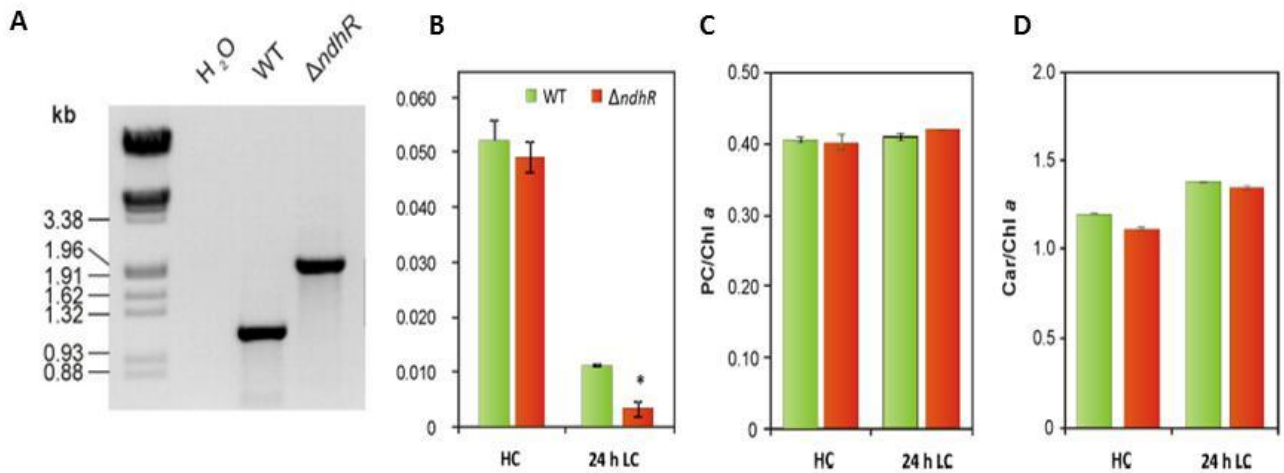

**Figure S3:** Genotypic and phenotypic characterization of the *Synechocystis* 6803 mutant  $\Delta ndhR$ .

A: Verification of the mutant genotype by PCR.

B: Growth rate of  $\Delta ndhR$  when cultivated under HC (5%  $CO_2$ ) and LC (0.038%  $CO_2$ ).

C, D: Pigment ratios of phycocyanin (PC) and carotenoids (Car) relative to chlorophyll a (Chl a) - content. (\* - statistical significance determination using t-test at  $p \leq 0.05$ )

**Supplemental Table S3 – Antisense:mRNA pairs for an expression change was observed for the asRNA but not for the corresponding mRNA.**

Values are given as log2 fold changes and were regarded as significant (marked with \*) if the log2 value was  $\leq -1$  or  $\geq 1$  and the according p-value  $\leq 0.05$ .

| asRNA              |        |        | mRNA           |       |        | Annotation         |                                                                                              |
|--------------------|--------|--------|----------------|-------|--------|--------------------|----------------------------------------------------------------------------------------------|
| asRNA              | 3h LC  | 24h LC | Gene           | 3h LC | 24h LC | Gene symbol        | Protein names                                                                                |
| <i>slI0922-as1</i> | 1.70*  | 2.25*  | <i>slI0922</i> | 0.05  | -0.02  |                    | unknown protein                                                                              |
| <i>slI0723-as4</i> | 0.97   | 1.99*  | <i>slI0723</i> | 0.15  | -0.48  |                    | unknown protein                                                                              |
| <i>slI0027-as1</i> | 2.34*  | 1.93*  | <i>slI0027</i> | 0.83  | -0.20  | <i>ndhD4</i>       | NADH dehydrogenase subunit 4 (involved in constitutive, low affinity CO <sub>2</sub> uptake) |
| <i>slr1534-as1</i> | 0.97   | 1.86*  | <i>slr1534</i> | 0.09  | -0.20  |                    | Putative carboxy peptidase                                                                   |
| <i>slI1540-as1</i> | 0.35   | 1.70*  | <i>slI1540</i> | 0.16  | -0.19  | <i>dpm1</i>        | dolichyl-phosphate-mannose synthase                                                          |
| <i>slr0479-as1</i> | -0.14  | 1.51*  | <i>slr0479</i> | -0.03 | -0.01  |                    | hypothetical protein                                                                         |
| <i>slI1161-as1</i> | 0.27   | 1.50*  | <i>slI1161</i> | -0.05 | 0.12   | <i>cya3</i>        | probable adenylate cyclase                                                                   |
| <i>slI0898-as1</i> | 1.11   | 1.48*  | <i>slI0898</i> | -0.73 | -0.43  | <i>rsgA (engC)</i> | putative ribosome biogenesis GTPase                                                          |
| <i>slr1596-as2</i> | 0.98   | 1.38*  | <i>slr1596</i> | 0.16  | 0.13   | <i>pcxA (cotA)</i> | Proton extrusion protein                                                                     |
| <i>slr0517-as1</i> | 0.39   | 1.38*  | <i>slr0517</i> | -0.05 | 0.13   |                    | hypothetical protein                                                                         |
| <i>slI1319-as1</i> | 0.27   | 1.35*  | <i>slI1319</i> | -0.12 | -0.17  |                    | hypothetical protein                                                                         |
| <i>slI1939-as1</i> | 1.73*  | 1.34*  | <i>slI1939</i> | 0.20  | 0.18   |                    | unknown protein                                                                              |
| <i>slr0919-as1</i> | 1.98*  | 1.27*  | <i>slr0919</i> | -0.40 | -0.37  |                    | hypothetical protein                                                                         |
| <i>slr1744-as2</i> | 0.14   | 1.23*  | <i>slr1744</i> | 0.58  | -0.35  | <i>amiA (amiC)</i> | N-acetylmuramoyl-L-alanine amidase, periplasmic protein                                      |
| <i>slI1174-as2</i> | 0.78   | 1.20*  | <i>slI1174</i> | -0.19 | -0.28  |                    | unknown protein                                                                              |
| <i>slr1254-as1</i> | 0.45   | 1.17*  | <i>slr1254</i> | -0.41 | -0.57  | <i>pds (crtD)</i>  | phytoene dehydrogenase (phytoene desaturase)                                                 |
| <i>slI0095-as1</i> | 0.57   | 1.16*  | <i>slI0095</i> | 0.37  | -0.08  |                    | hypothetical protein                                                                         |
| <i>slI0247-as2</i> | 0.32   | 1.16*  | <i>slI0247</i> | 0.01  | 0.00   | <i>isiA</i>        | ironstress-induced chlorophyll-binding protein (CP43')                                       |
| <i>slI1174-as1</i> | 0.81   | 1.15*  | <i>slI1174</i> | -0.19 | -0.28  |                    | unknown protein                                                                              |
| <i>slI1665-as1</i> | 0.27   | 1.14*  | <i>slI1665</i> | 0.40  | -0.07  |                    | unknown protein                                                                              |
| <i>ssI2982-as1</i> | 0.71   | 1.12*  | <i>ssI2982</i> | -0.29 | -0.67  | <i>rpoZ, ycf61</i> | probable RNA polymerase omega subunit                                                        |
| <i>slI1191-as2</i> | 0.06   | 1.11*  | <i>slI1191</i> | -0.20 | -0.05  |                    | hypothetical protein                                                                         |
| <i>slr0244-as1</i> | 0.78   | 1.09*  | <i>slr0244</i> | -0.34 | -0.33  |                    | hypothetical protein                                                                         |
| <i>slr1053-as4</i> | 0.43   | 1.09*  | <i>slr1053</i> | 0.45  | -0.09  |                    | unknown protein                                                                              |
| <i>slr1053-as3</i> | 0.39   | 1.09*  | <i>slr1053</i> | 0.45  | -0.09  |                    | unknown protein                                                                              |
| <i>slr1847-as1</i> | -0.01  | 1.06*  | <i>slr1847</i> | -0.32 | -0.78  |                    | hypothetical protein                                                                         |
| <i>slI1934-as1</i> | 1.57   | 1.06*  | <i>slI1934</i> | 0.64  | 0.38   |                    | hypothetical protein                                                                         |
| <i>slI1127-as1</i> | 1.00*  | 1.05*  | <i>slI1127</i> | 0.11  | -0.16  | <i>menB</i>        | 1,4-dihydroxy-2-naphthoate synthase                                                          |
| <i>slr1491-as1</i> | 0.23   | 1.04*  | <i>slr1491</i> | 0.29  | 0.11   | <i>fecB</i>        | iron(III) dicitrate transport system substrate-binding protein                               |
| <i>slr1028-as2</i> | 0.29   | 1.02*  | <i>slr1028</i> | 0.06  | 0.31   |                    | unknown protein                                                                              |
| <i>slI1723-as1</i> | -0.53  | -1.02* | <i>slI1723</i> | 0.11  | 0.01   |                    | probable glycosyltransferase                                                                 |
| <i>slI0986-as1</i> | -0.82  | -1.04* | <i>slI0986</i> | -0.02 | -0.08  |                    | putative transposase ISY120f                                                                 |
| <i>slr1334-as1</i> | -0.71  | -1.06* | <i>slr1334</i> | 0.09  | -0.21  | <i>Pgm</i>         | phosphoglucomutase/phosphomannomutase                                                        |
| <i>slr0354-as4</i> | -1.12* | -1.08* | <i>slr0354</i> | 0.20  | 0.23   |                    | ATP-binding protein of ABC transporter                                                       |
| <i>slr1476-as1</i> | -1.09* | -1.09* | <i>slr1476</i> | -0.04 | -0.28  | <i>pyrB</i>        | aspartate carbamoyltransferase                                                               |
| <i>slr0015-as1</i> | 0.11   | -1.13* | <i>slr0015</i> | 0.15  | 0.17   | <i>lpxB</i>        | lipid A disaccharide synthase                                                                |
| <i>slr1237-as1</i> | -0.31  | -1.24* | <i>slr1237</i> | 0.03  | 0.03   | <i>codA</i>        | cytosine deaminase                                                                           |
| <i>slr1876-as1</i> | -1.05* | -1.31* | <i>slr1876</i> | 0.14  | 0.11   |                    | hypothetical protein                                                                         |
| <i>slI0494-as1</i> | -1.35* | -1.47* | <i>slI0494</i> | 0.24  | 0.09   |                    | unknown protein                                                                              |
| <i>slr0776-as5</i> | -1.79* | -1.57* | <i>slr0776</i> | -0.32 | -0.42  | <i>lpxD</i>        | UDP-3-O-[3-hydroxymyristoyl] glucosamine N-acyltransferase                                   |

**Supplemental Table S4 – LC-induced features that are independent from NdhR but whose expression induction appeared delayed.**

Values are given as log2 fold changes and were regarded as significant (marked with \*) if the log2 value was  $\leq -1$  or  $\geq 1$  and the according p-value  $\leq 0.05$ . The expression values for HC were used as reference. Fold changes between WT and  $\Delta ndhR$  were calculated for each time point by subtracting the corresponding WT-value.

| Systematic     | Gene name                    | Protein name                                           | Feature | WT    |        | $\Delta ndhR$ |        | $\Delta ndhR$ -WT |               |        |
|----------------|------------------------------|--------------------------------------------------------|---------|-------|--------|---------------|--------|-------------------|---------------|--------|
|                |                              |                                                        |         | 3h LC | 24h LC | 3h LC         | 24h LC | HC                | 3h LC         | 24h LC |
| <i>slI0217</i> | NA                           | flavoprotein                                           | mRNA    | 5.58* | 4.95*  | 2.06          | 5.04*  | -0.02             | <b>-3.54*</b> | 0.08   |
| <i>slI0218</i> | NA                           | hypothetical protein                                   | mRNA    | 5.33* | 5.08*  | 1.88          | 4.83*  | -0.01             | <b>-3.46*</b> | -0.25  |
| <i>slI0219</i> | NA                           | flavoprotein                                           | mRNA    | 5.23* | 5.05*  | 1.88          | 4.78*  | 0.03              | <b>-3.33*</b> | -0.25  |
| <i>slI0519</i> | <i>ndhA</i>                  | NADH dehydrogenase subunit 1                           | mRNA    | 2.16* | 2.07*  | 1.00          | 2.00*  | 0.03              | <b>-1.13*</b> | -0.03  |
| <i>slI0520</i> | <i>ndhI</i>                  | NADH dehydrogenase subunit NdhI                        | mRNA    | 1.76* | 2.01*  | 0.70          | 1.89*  | 0.03              | <b>-1.03*</b> | -0.09  |
| <i>slr0006</i> | NA                           | unknown protein                                        | mRNA    | 3.68* | 3.26*  | 1.68          | 3.69*  | 0.09              | <b>-1.91*</b> | 0.53   |
| <i>slr0007</i> | NA                           | probable sugar-phosphate nucleotidyltransferase        | mRNA    | 2.53* | 2.00*  | 1.06          | 2.42*  | 0.08              | <b>-1.38*</b> | 0.49   |
| <i>slr0040</i> | <i>cmpA</i>                  | bicarbonate transport system substrate-binding protein | mRNA    | 5.28* | 4.73*  | 1.95          | 4.90*  | 0.00              | <b>-3.33*</b> | 0.16   |
| <i>slr0041</i> | <i>cmpB</i>                  | bicarbonate transport system permease protein          | mRNA    | 5.14* | 4.66*  | 2.00          | 4.75*  | -0.02             | <b>-3.16*</b> | 0.07   |
| <i>slr0042</i> | NA                           | probable porin                                         | mRNA    | 4.54* | 4.21*  | 1.79          | 4.34*  | -0.03             | <b>-2.78*</b> | 0.10   |
| <i>slr0043</i> | <i>cmpC</i>                  | bicarbonate transport system ATP-binding protei n      | mRNA    | 4.24* | 3.64*  | 1.65          | 3.79*  | -0.01             | <b>-2.60*</b> | 0.13   |
| <i>slr0044</i> | <i>cmpD</i>                  | bicarbonate transport system ATP-binding protei n      | mRNA    | 3.99* | 3.75*  | 1.52          | 3.72*  | -0.01             | <b>-2.48*</b> | -0.04  |
| <i>slr0373</i> | NA                           | hypothetical protein                                   | mRNA    | 2.70* | 3.57*  | 1.34*         | 3.89*  | -0.10             | <b>-1.46*</b> | 0.21   |
| <i>slr0374</i> | NA                           | hypothetical protein                                   | mRNA    | 2.65* | 3.64*  | 1.27*         | 3.90*  | -0.10             | <b>-1.48*</b> | 0.17   |
| <i>slr0376</i> | NA                           | hypothetical protein                                   | mRNA    | 2.25* | 4.01*  | 0.98          | 4.16*  | -0.05             | <b>-1.32*</b> | 0.10   |
| <i>slr0616</i> | NA                           | unknown protein                                        | mRNA    | 2.00* | 2.06*  | 0.68          | 2.02*  | 0.00              | <b>-1.32*</b> | -0.04  |
| <i>slr0789</i> | NA                           | hypothetical protein                                   | mRNA    | 1.81* | 1.92*  | 0.51          | 1.87*  | 0.23              | <b>-1.08*</b> | 0.18   |
| <i>slr1279</i> | <i>ndhC</i>                  | NADH dehydrogenase subunit 3                           | mRNA    | 2.28* | 1.88*  | 0.85          | 1.69*  | 0.08              | <b>-1.35*</b> | -0.12  |
| <i>slr1280</i> | <i>ndhK</i>                  | NADH dehydrogenase subunit NdhK                        | mRNA    | 1.89* | 1.73*  | 0.69          | 1.42*  | 0.07              | <b>-1.12*</b> | -0.24  |
| <i>slr1281</i> | <i>ndhJ</i>                  | NADH dehydrogenase subunit I                           | mRNA    | 1.88* | 1.88*  | 0.78          | 1.67*  | -0.01             | <b>-1.11*</b> | -0.23  |
| <i>ssl1911</i> | <i>gifA</i>                  | glutamine synthetase inactivating factor IF7           | mRNA    | 1.91  | 2.11*  | 0.71          | 3.69*  | -0.88             | <b>-2.08*</b> | 0.69   |
| <i>ssr1038</i> | NA                           | unknown protein                                        | mRNA    | 1.46* | 2.23*  | 0.37          | 2.11*  | 0.03              | <b>-1.05*</b> | -0.09  |
| NC-101         | <i>ncr1200</i>               | NA                                                     | ncRNA   | 1.94* | 3.85*  | 0.80          | 4.22*  | -0.16             | <b>-1.30*</b> | 0.22   |
| NC-392         | <i>ncr0840</i>               | NA                                                     | ncRNA   | 2.60* | 2.71*  | 1.09          | 2.82*  | 0.12              | <b>-1.40*</b> | 0.22   |
| NC-425         | CsiR1, SyR14, <i>ncr0380</i> | NA                                                     | ncRNA   | 3.03* | 5.69*  | 0.59          | 5.64*  | 0.07              | <b>-2.37*</b> | 0.02   |
