# Supplementary material
Source: PubMed Central journal article supplement (PMC4634042)

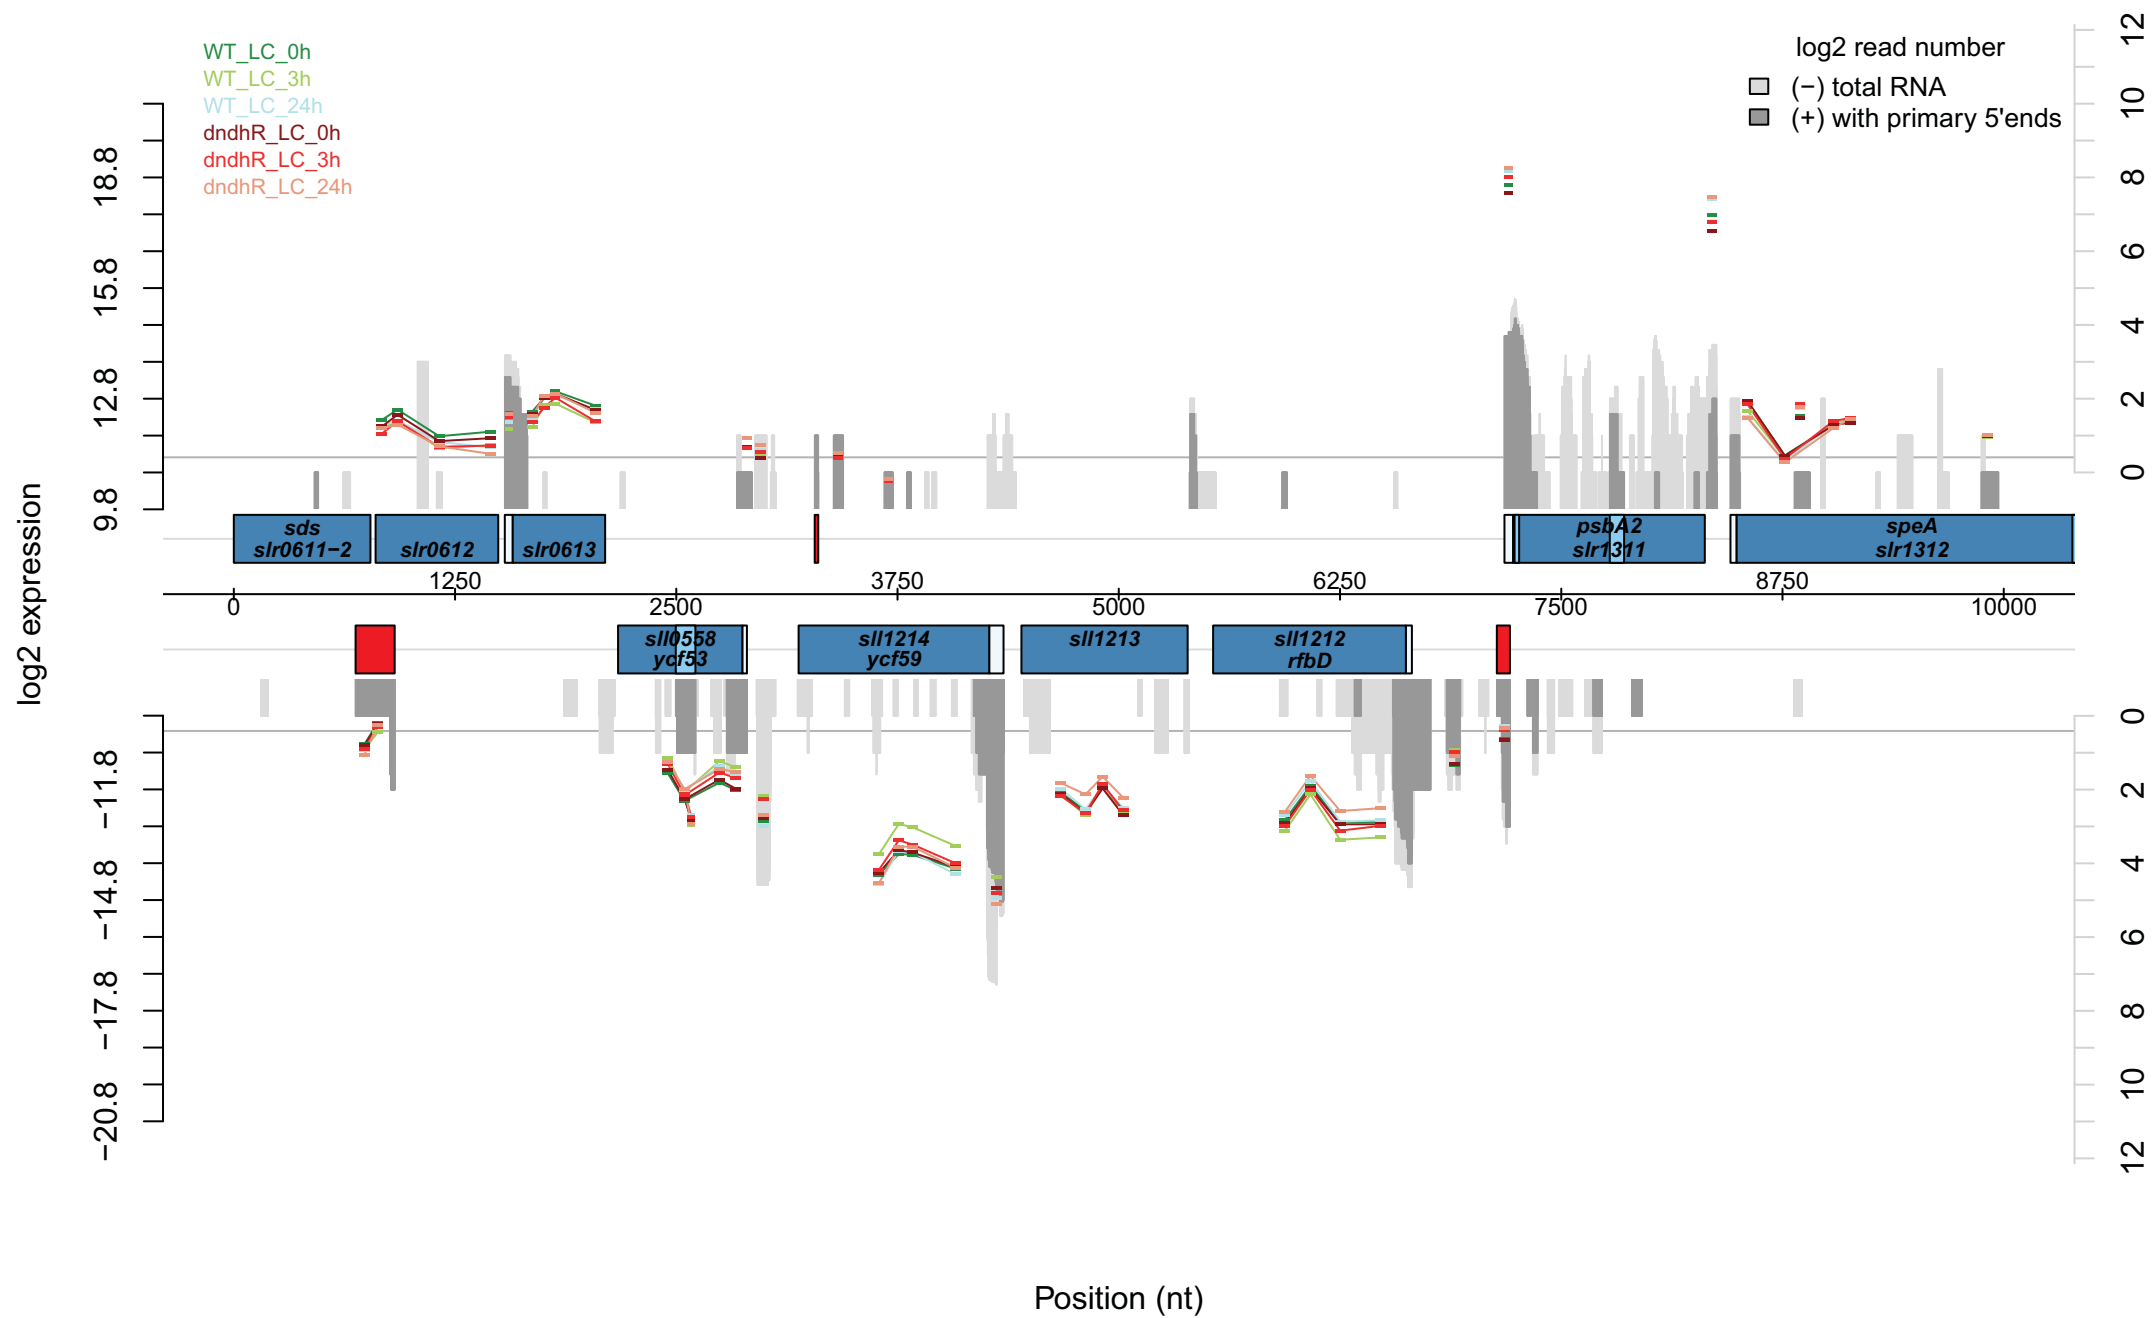

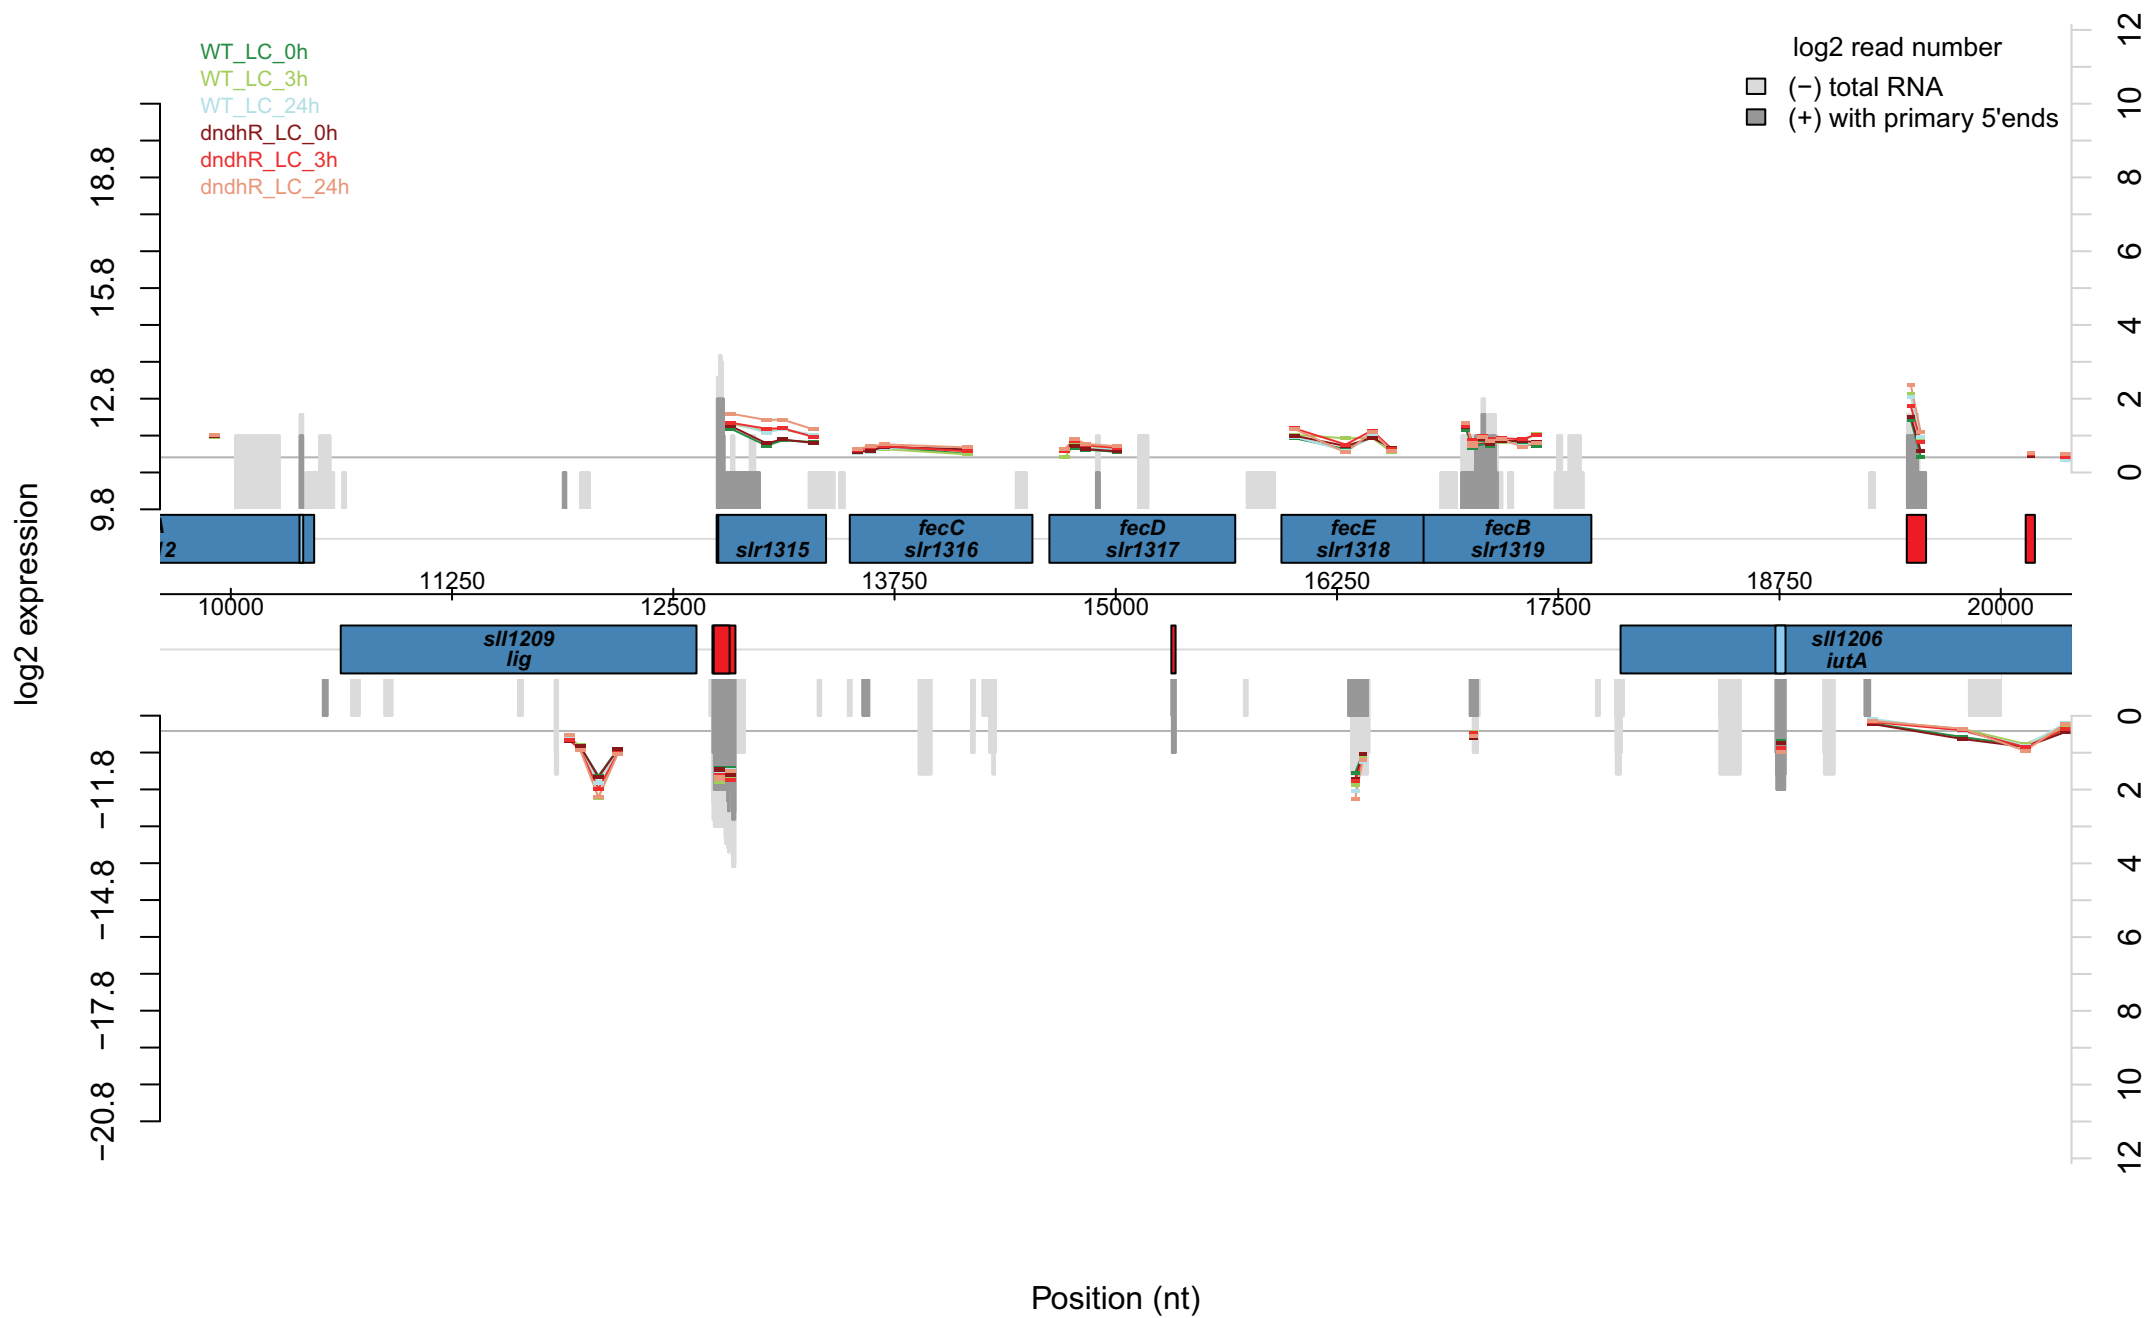

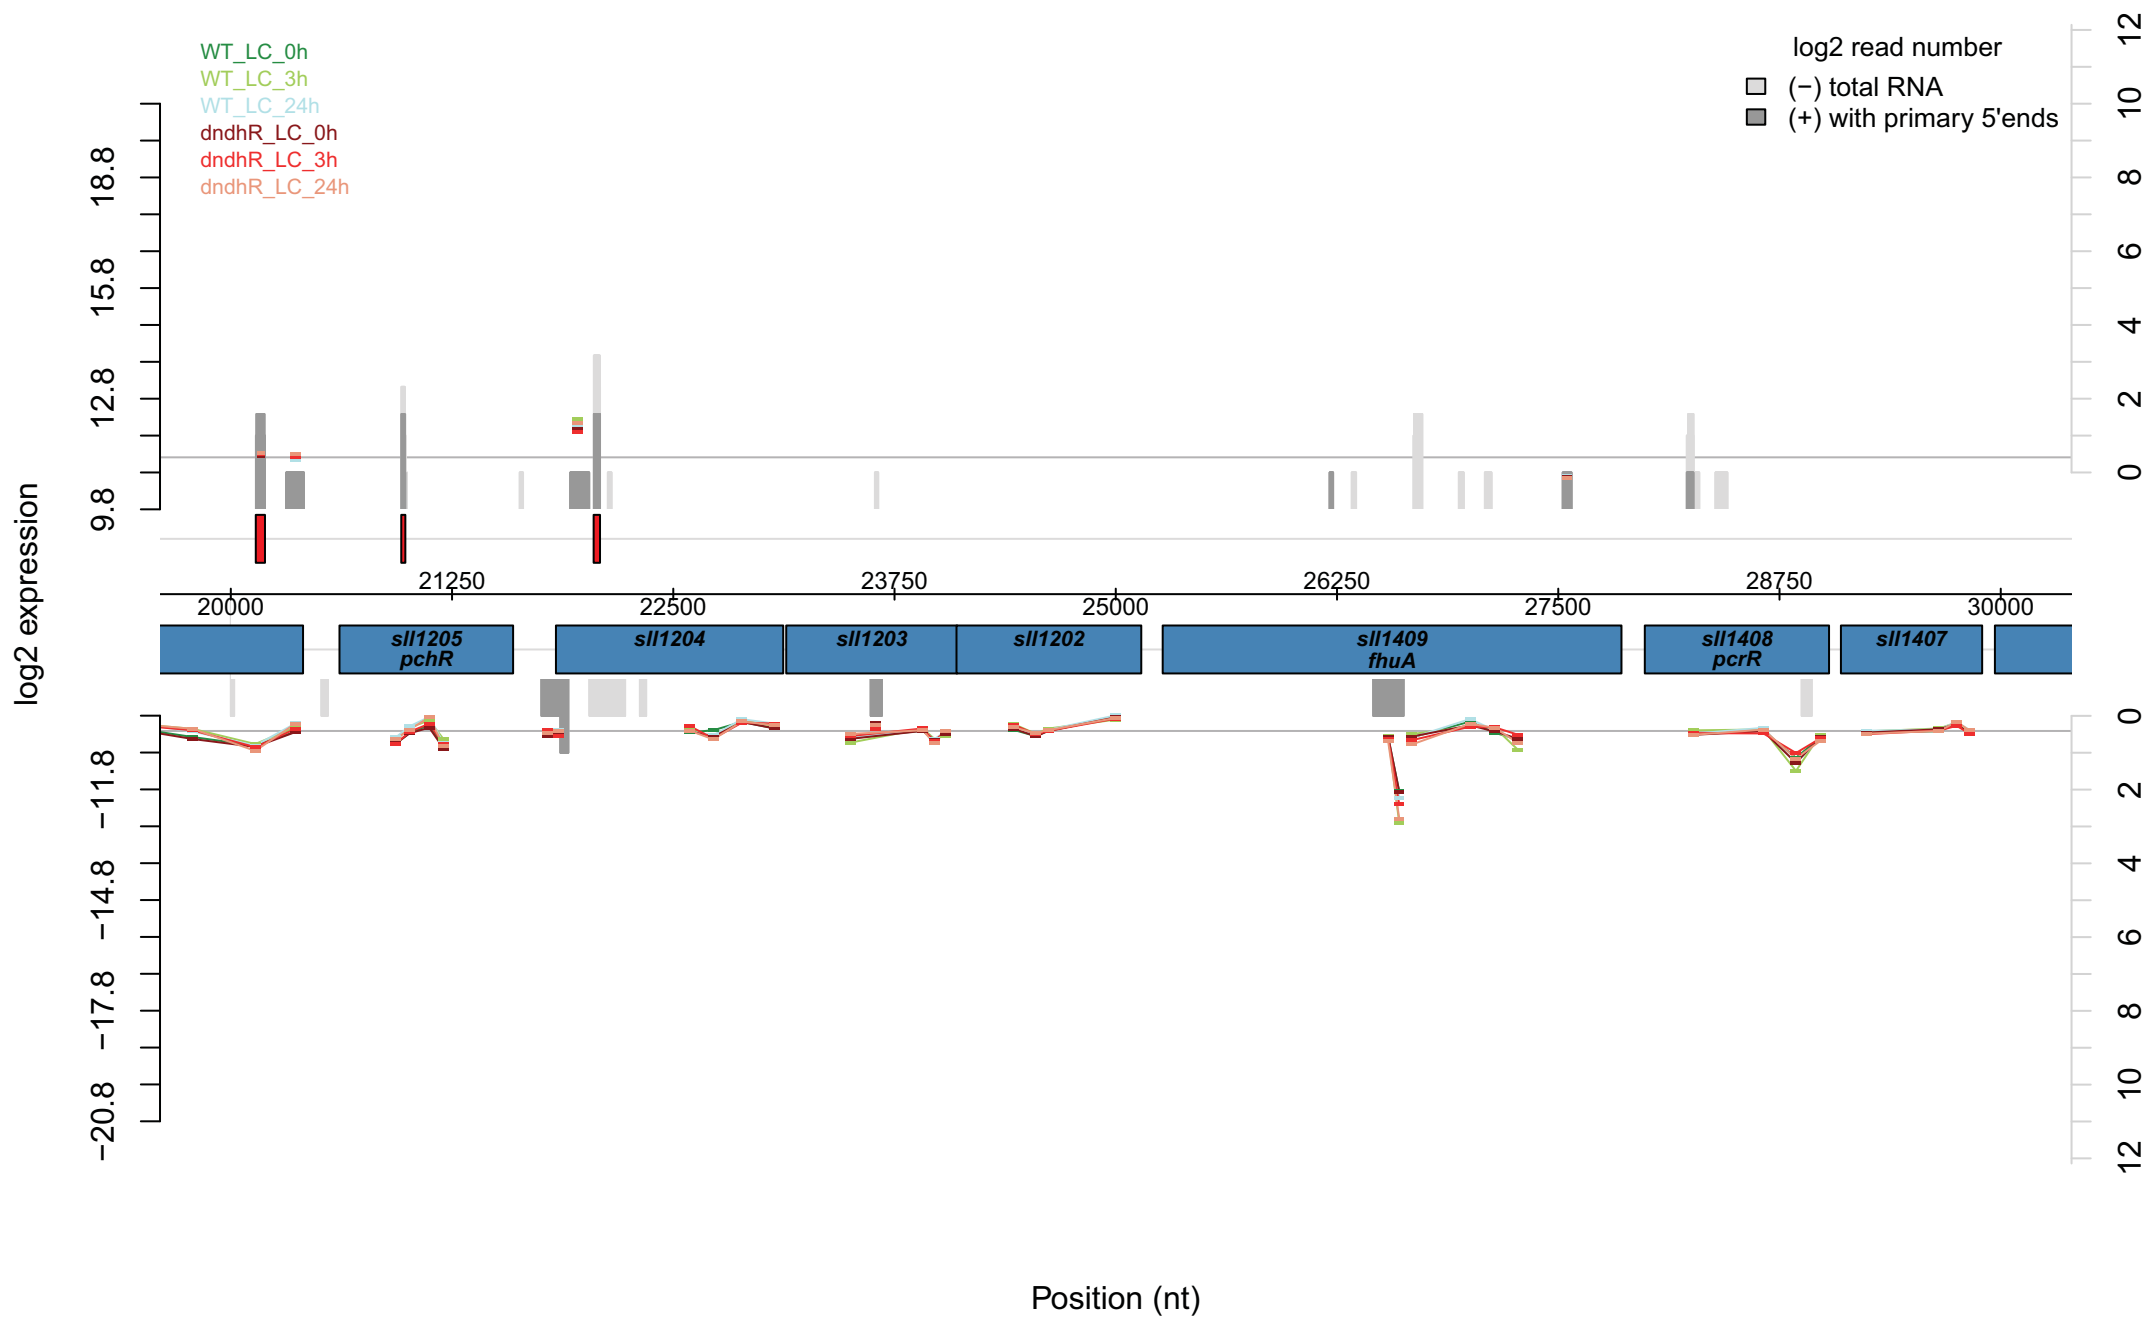

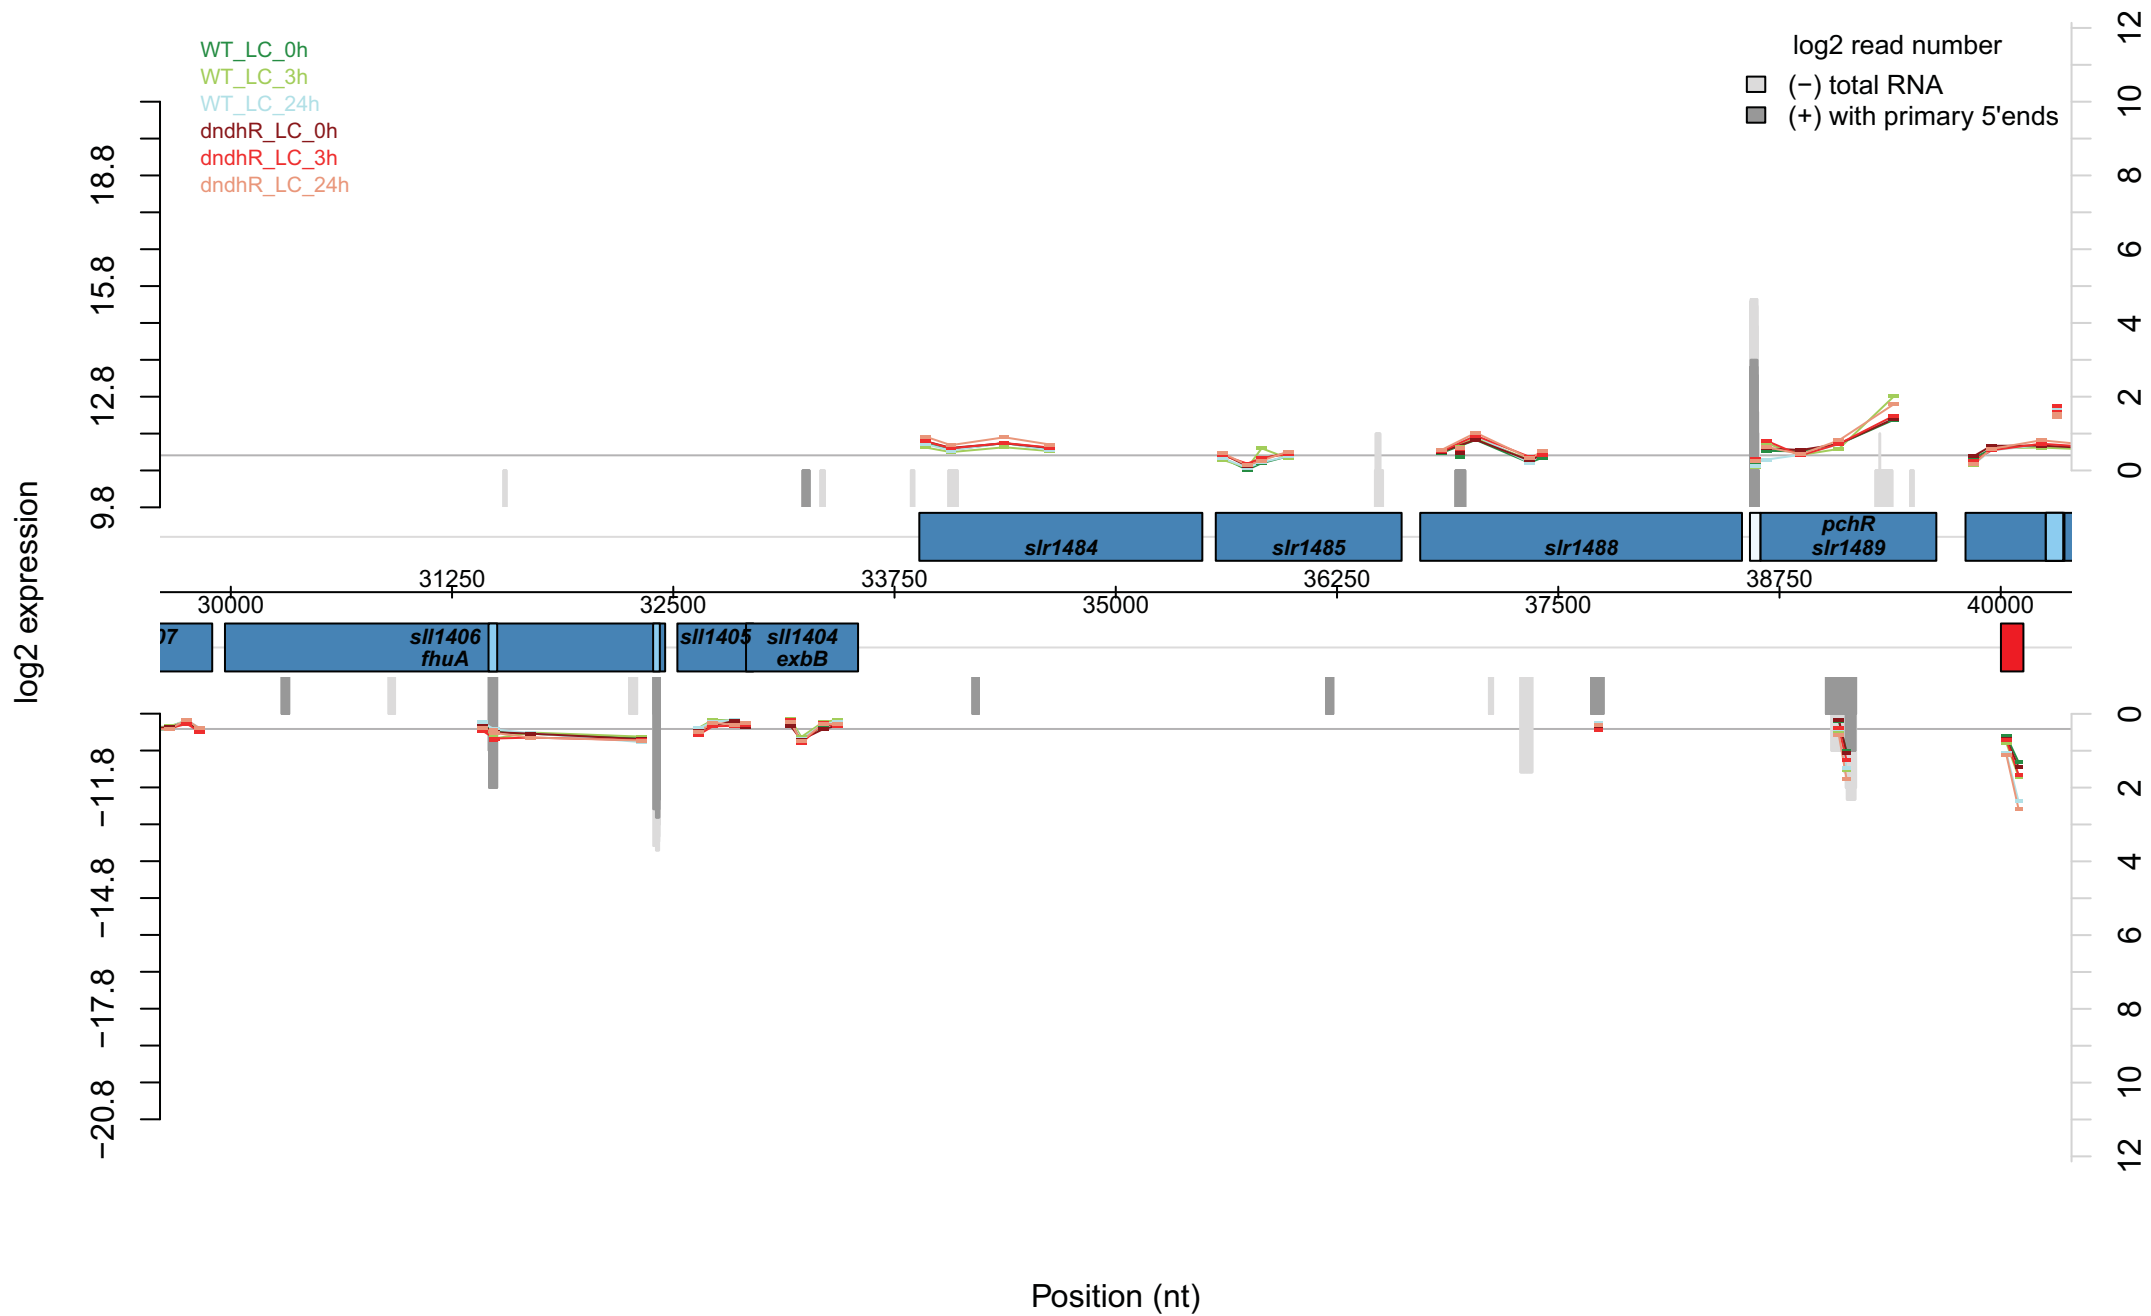

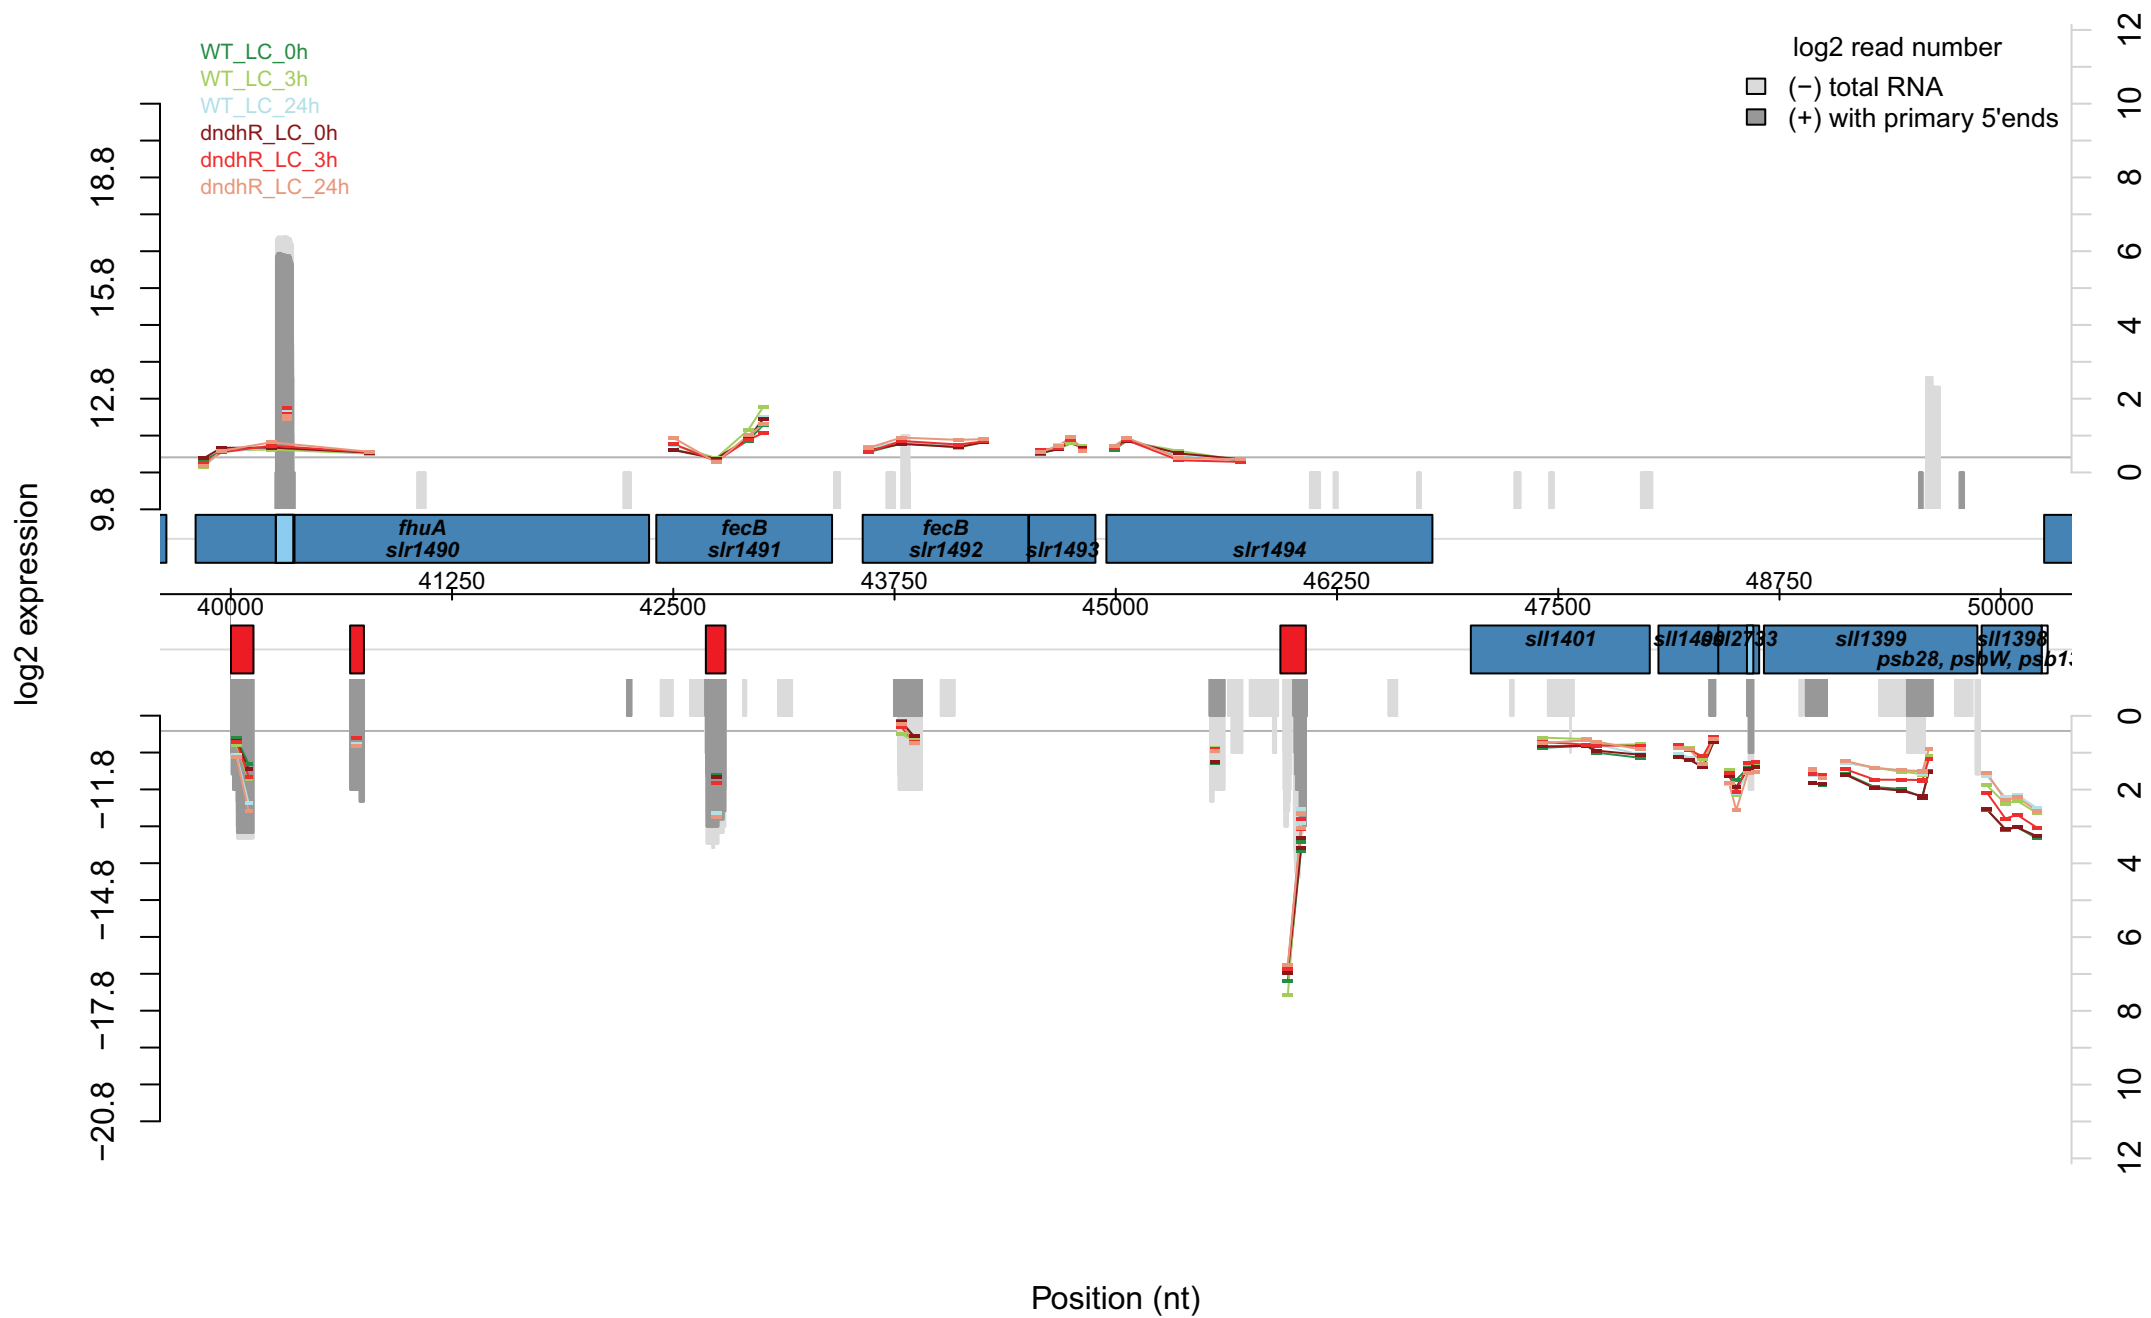

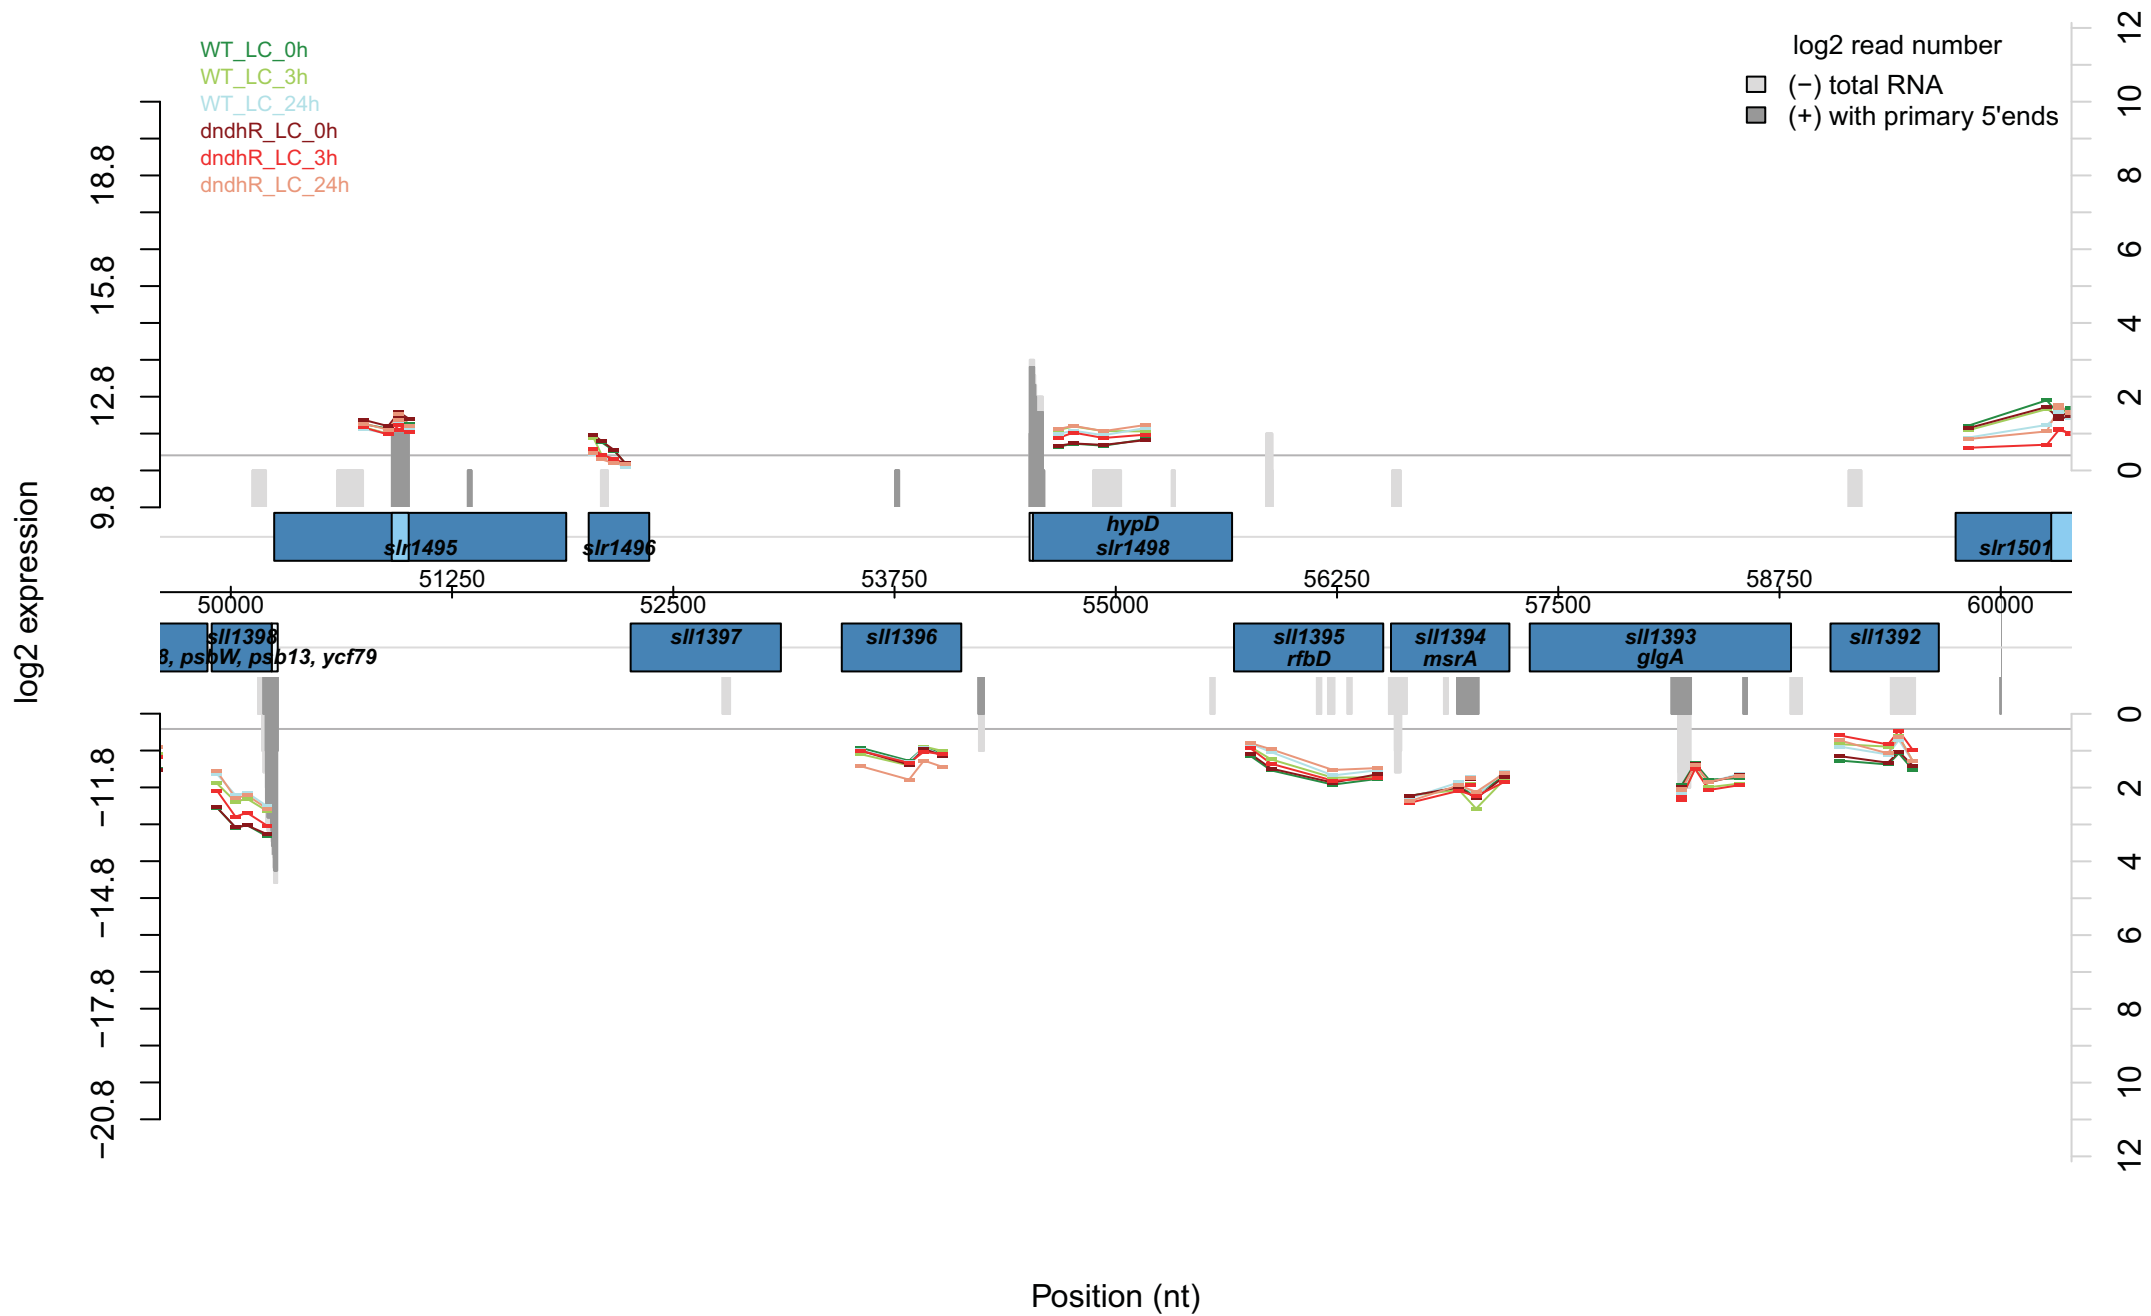

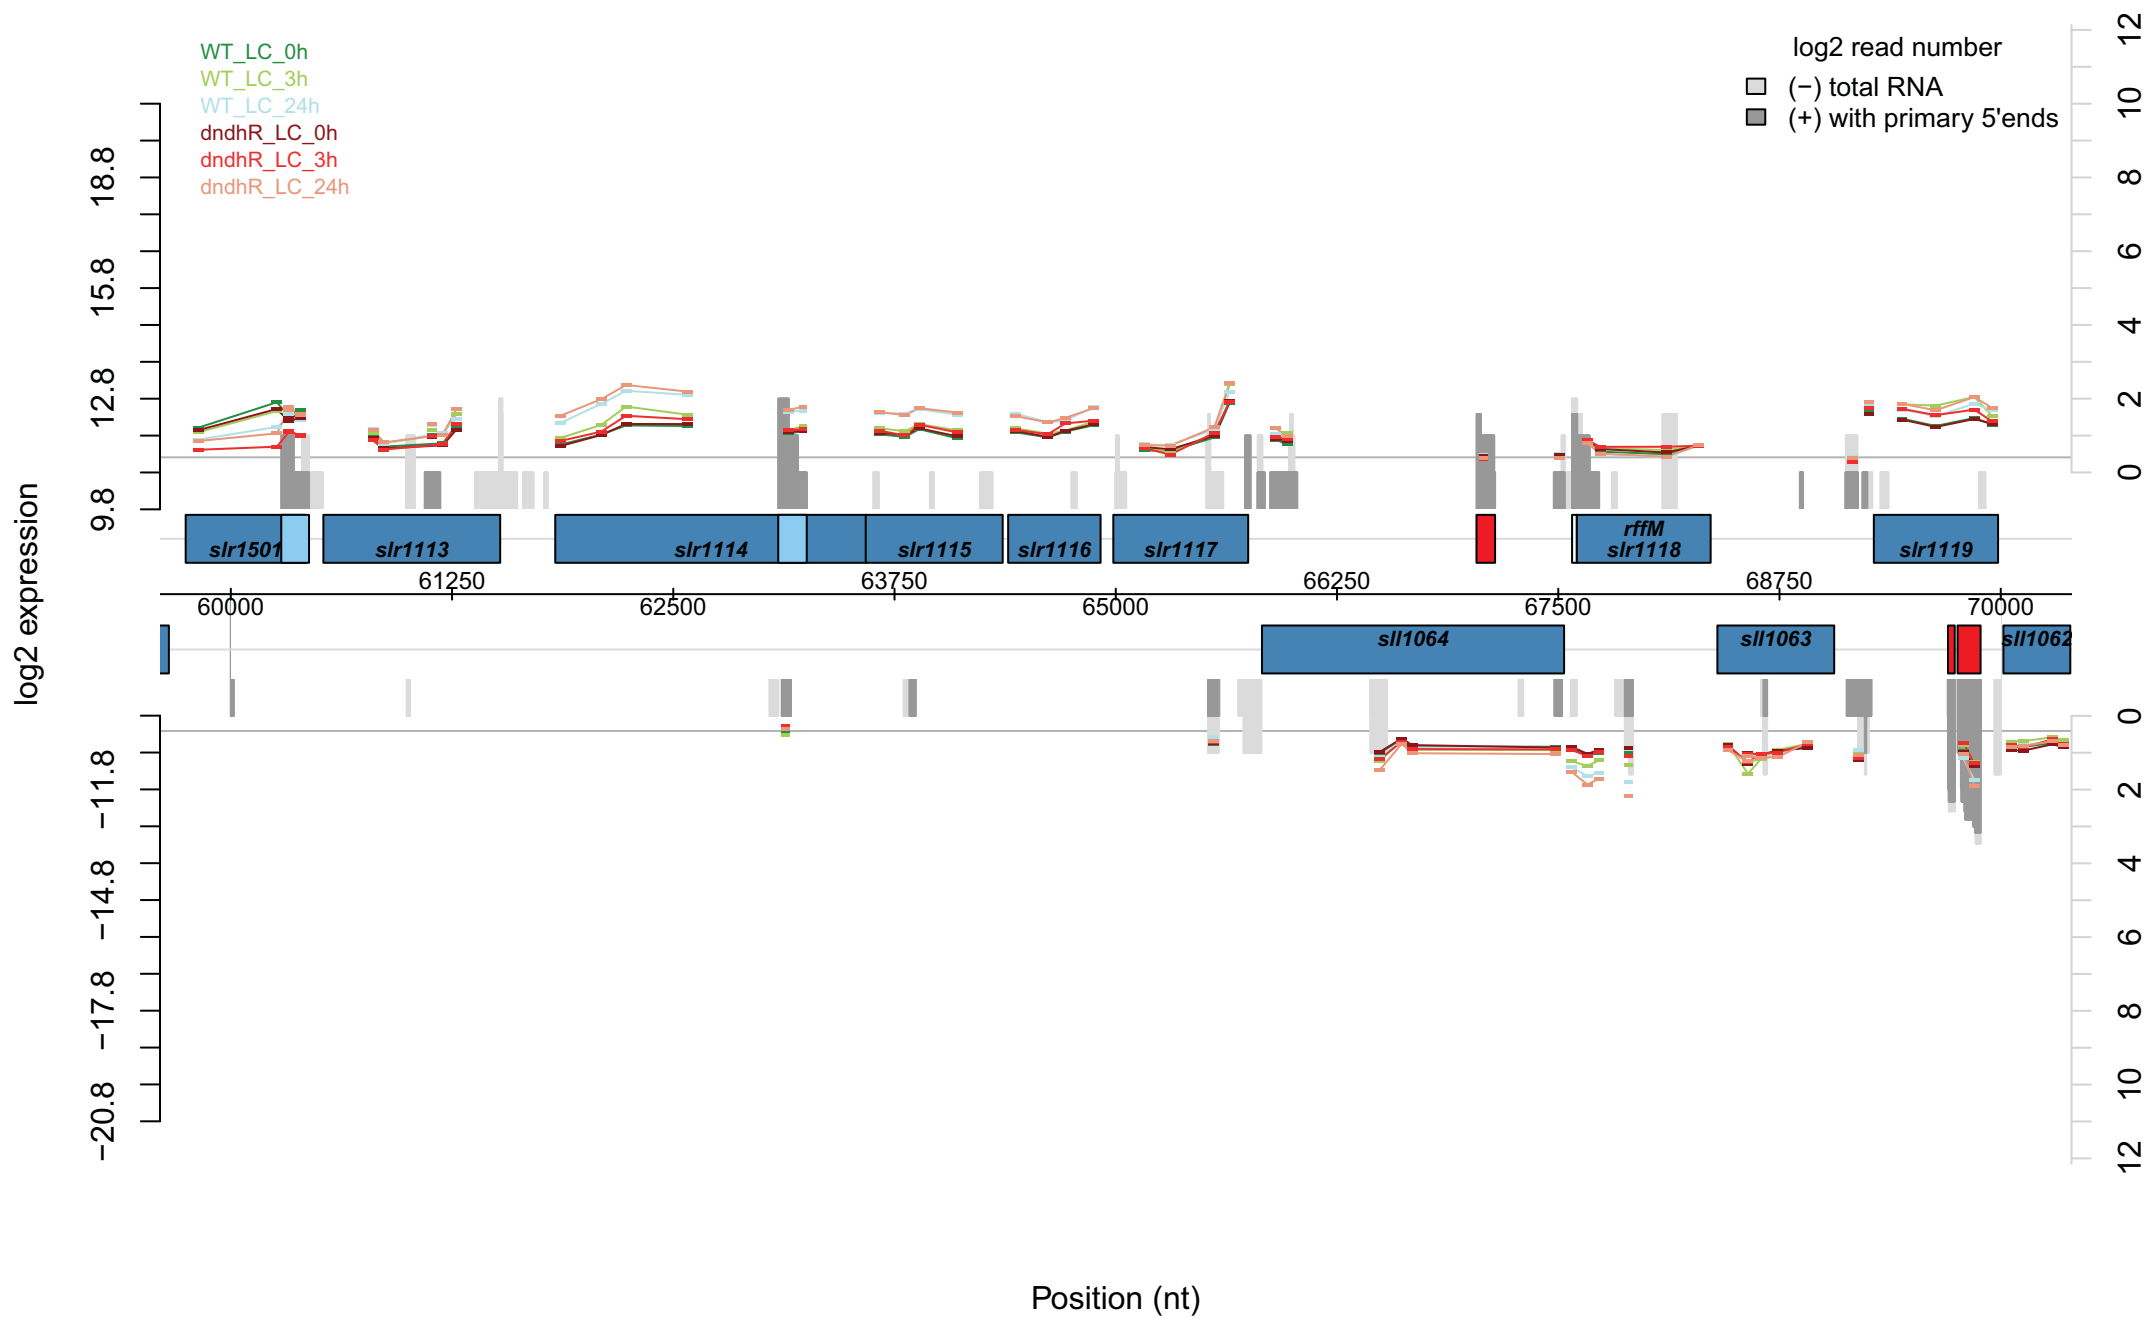

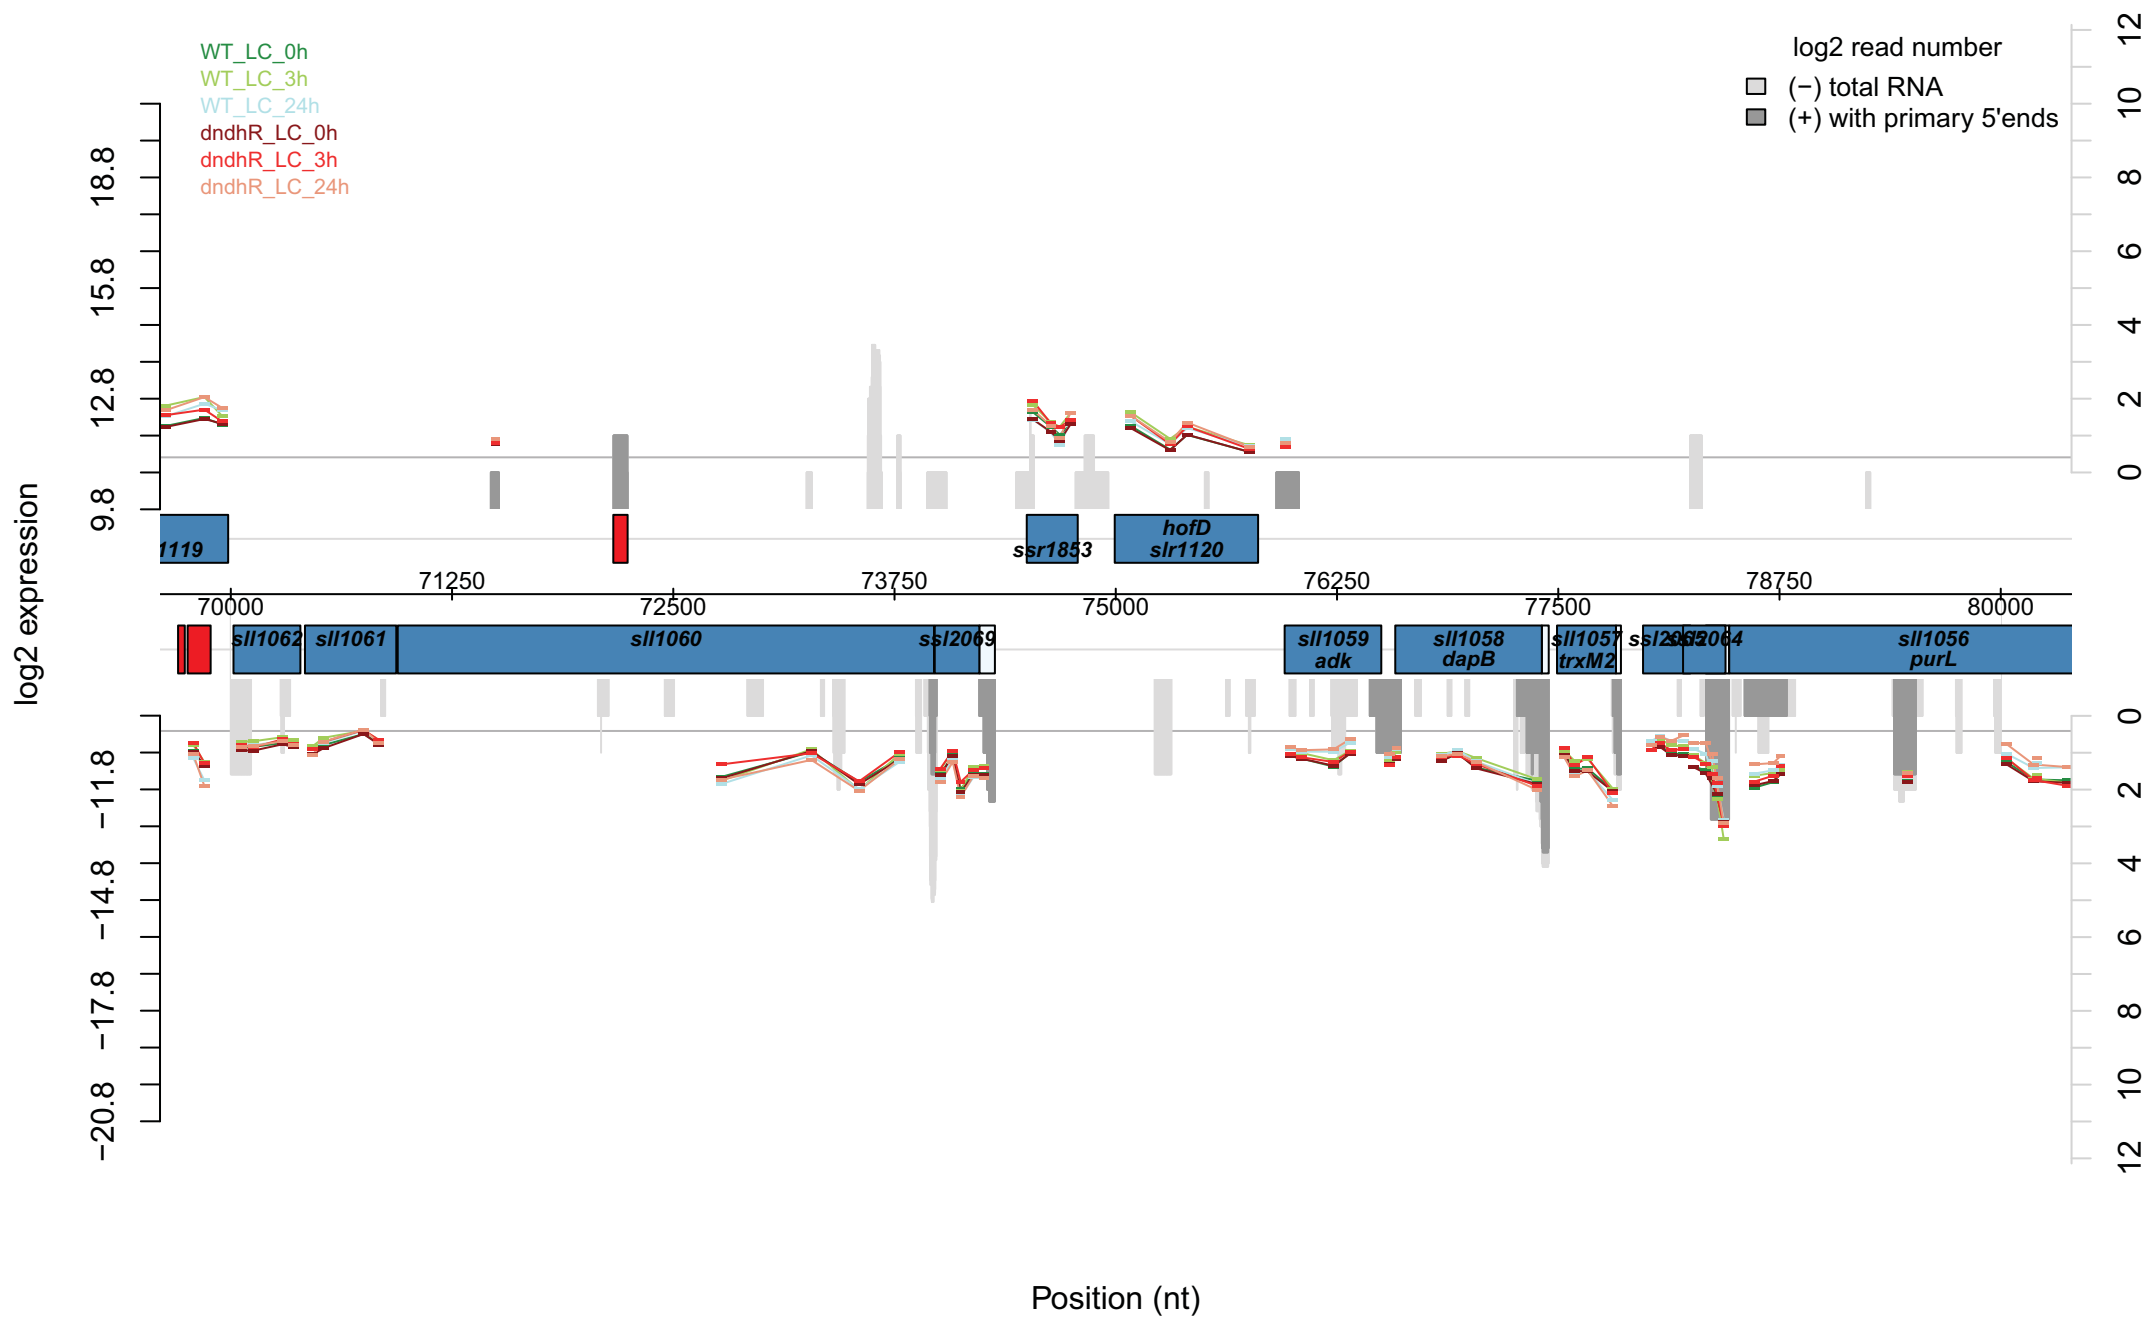



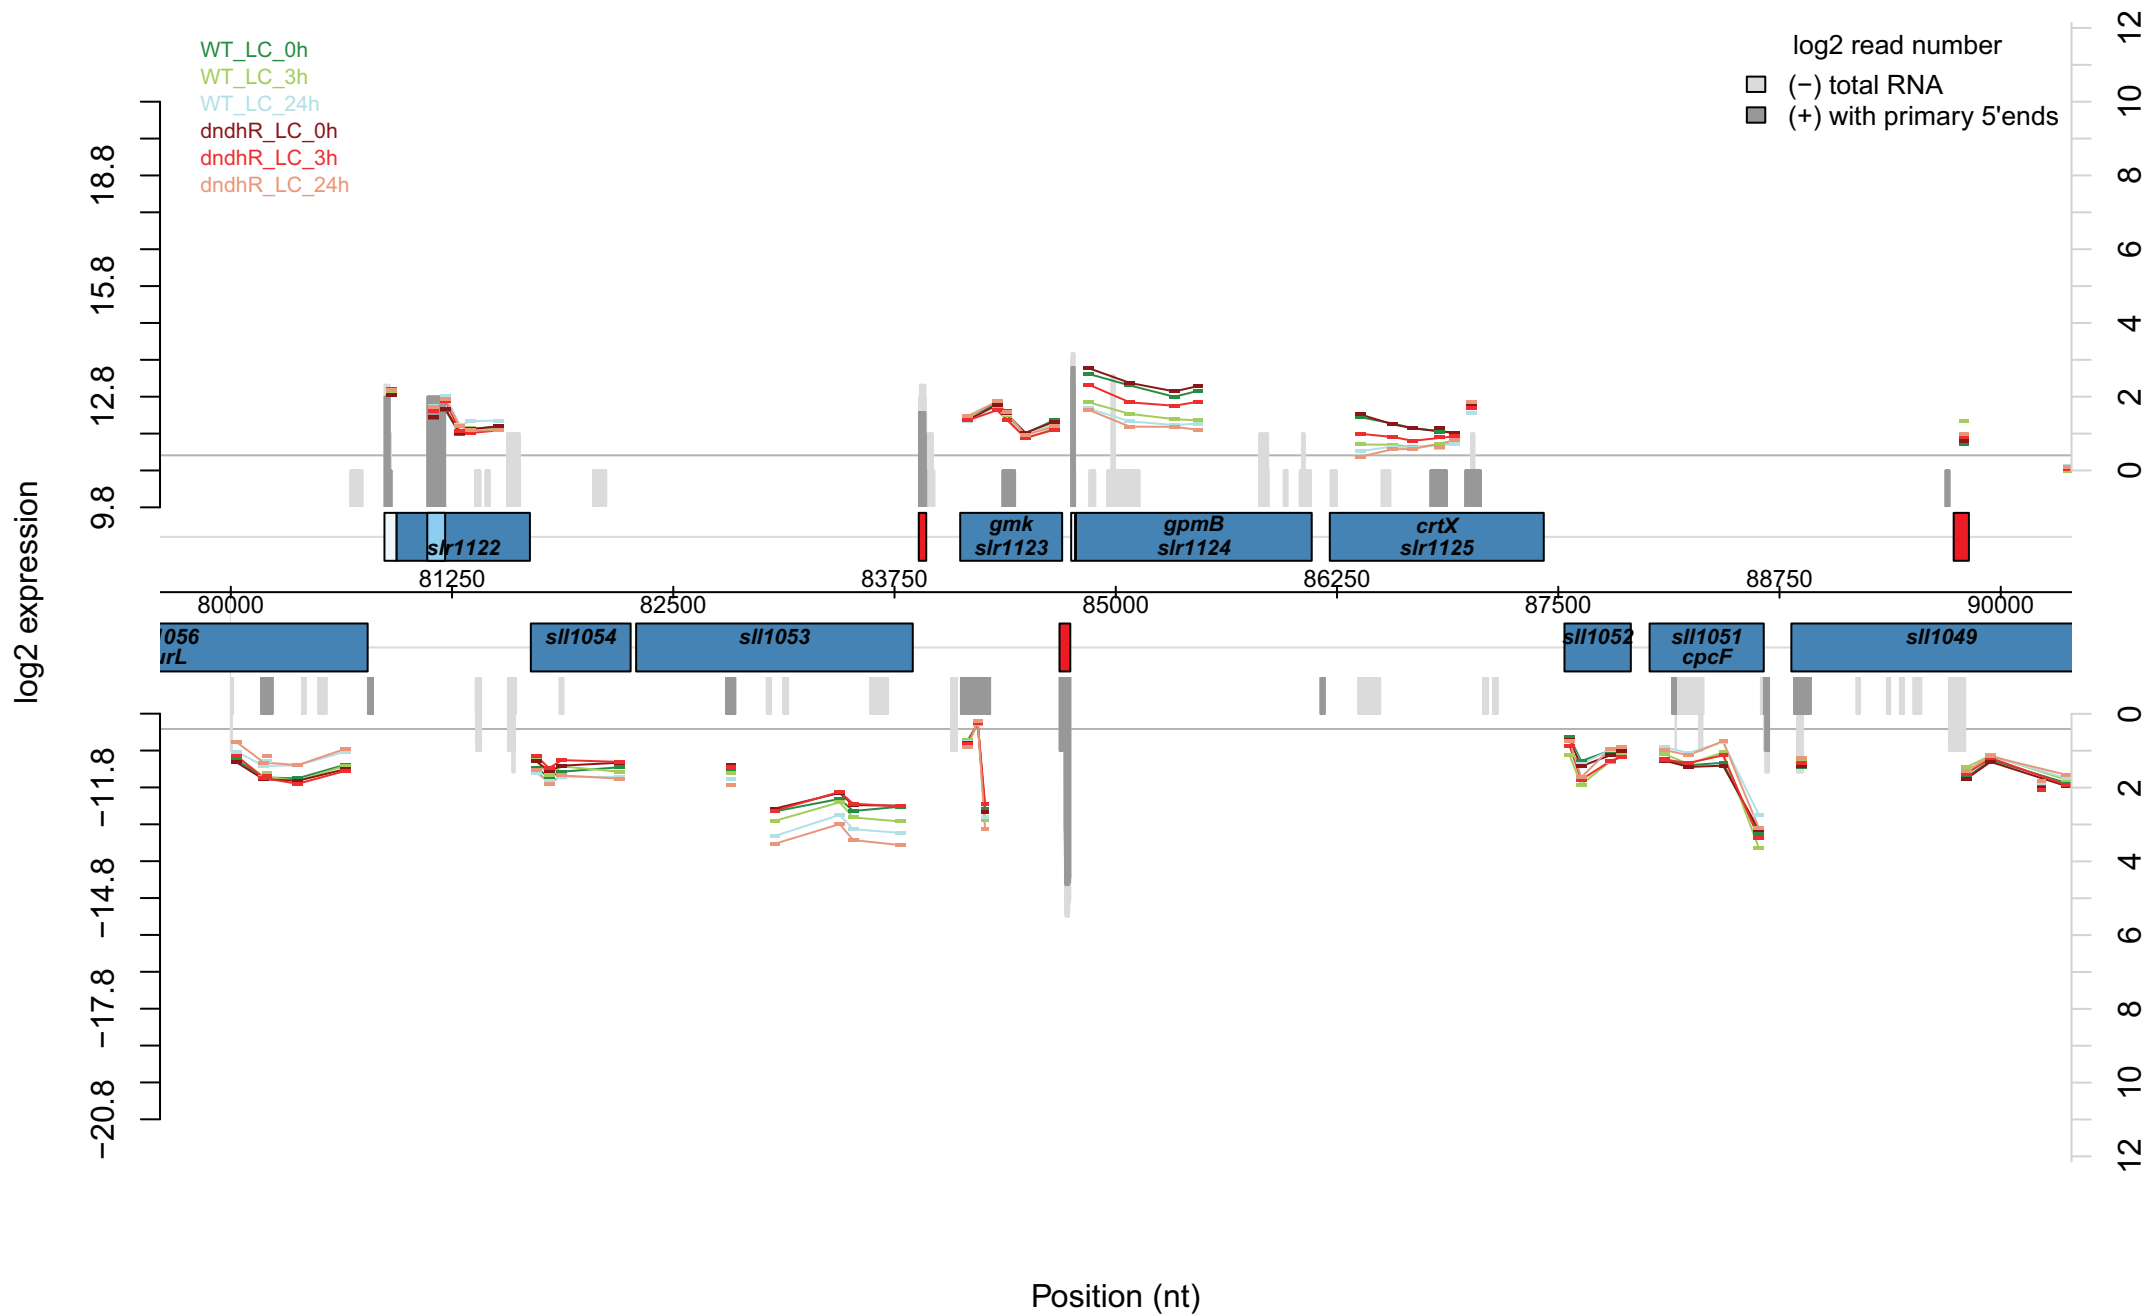

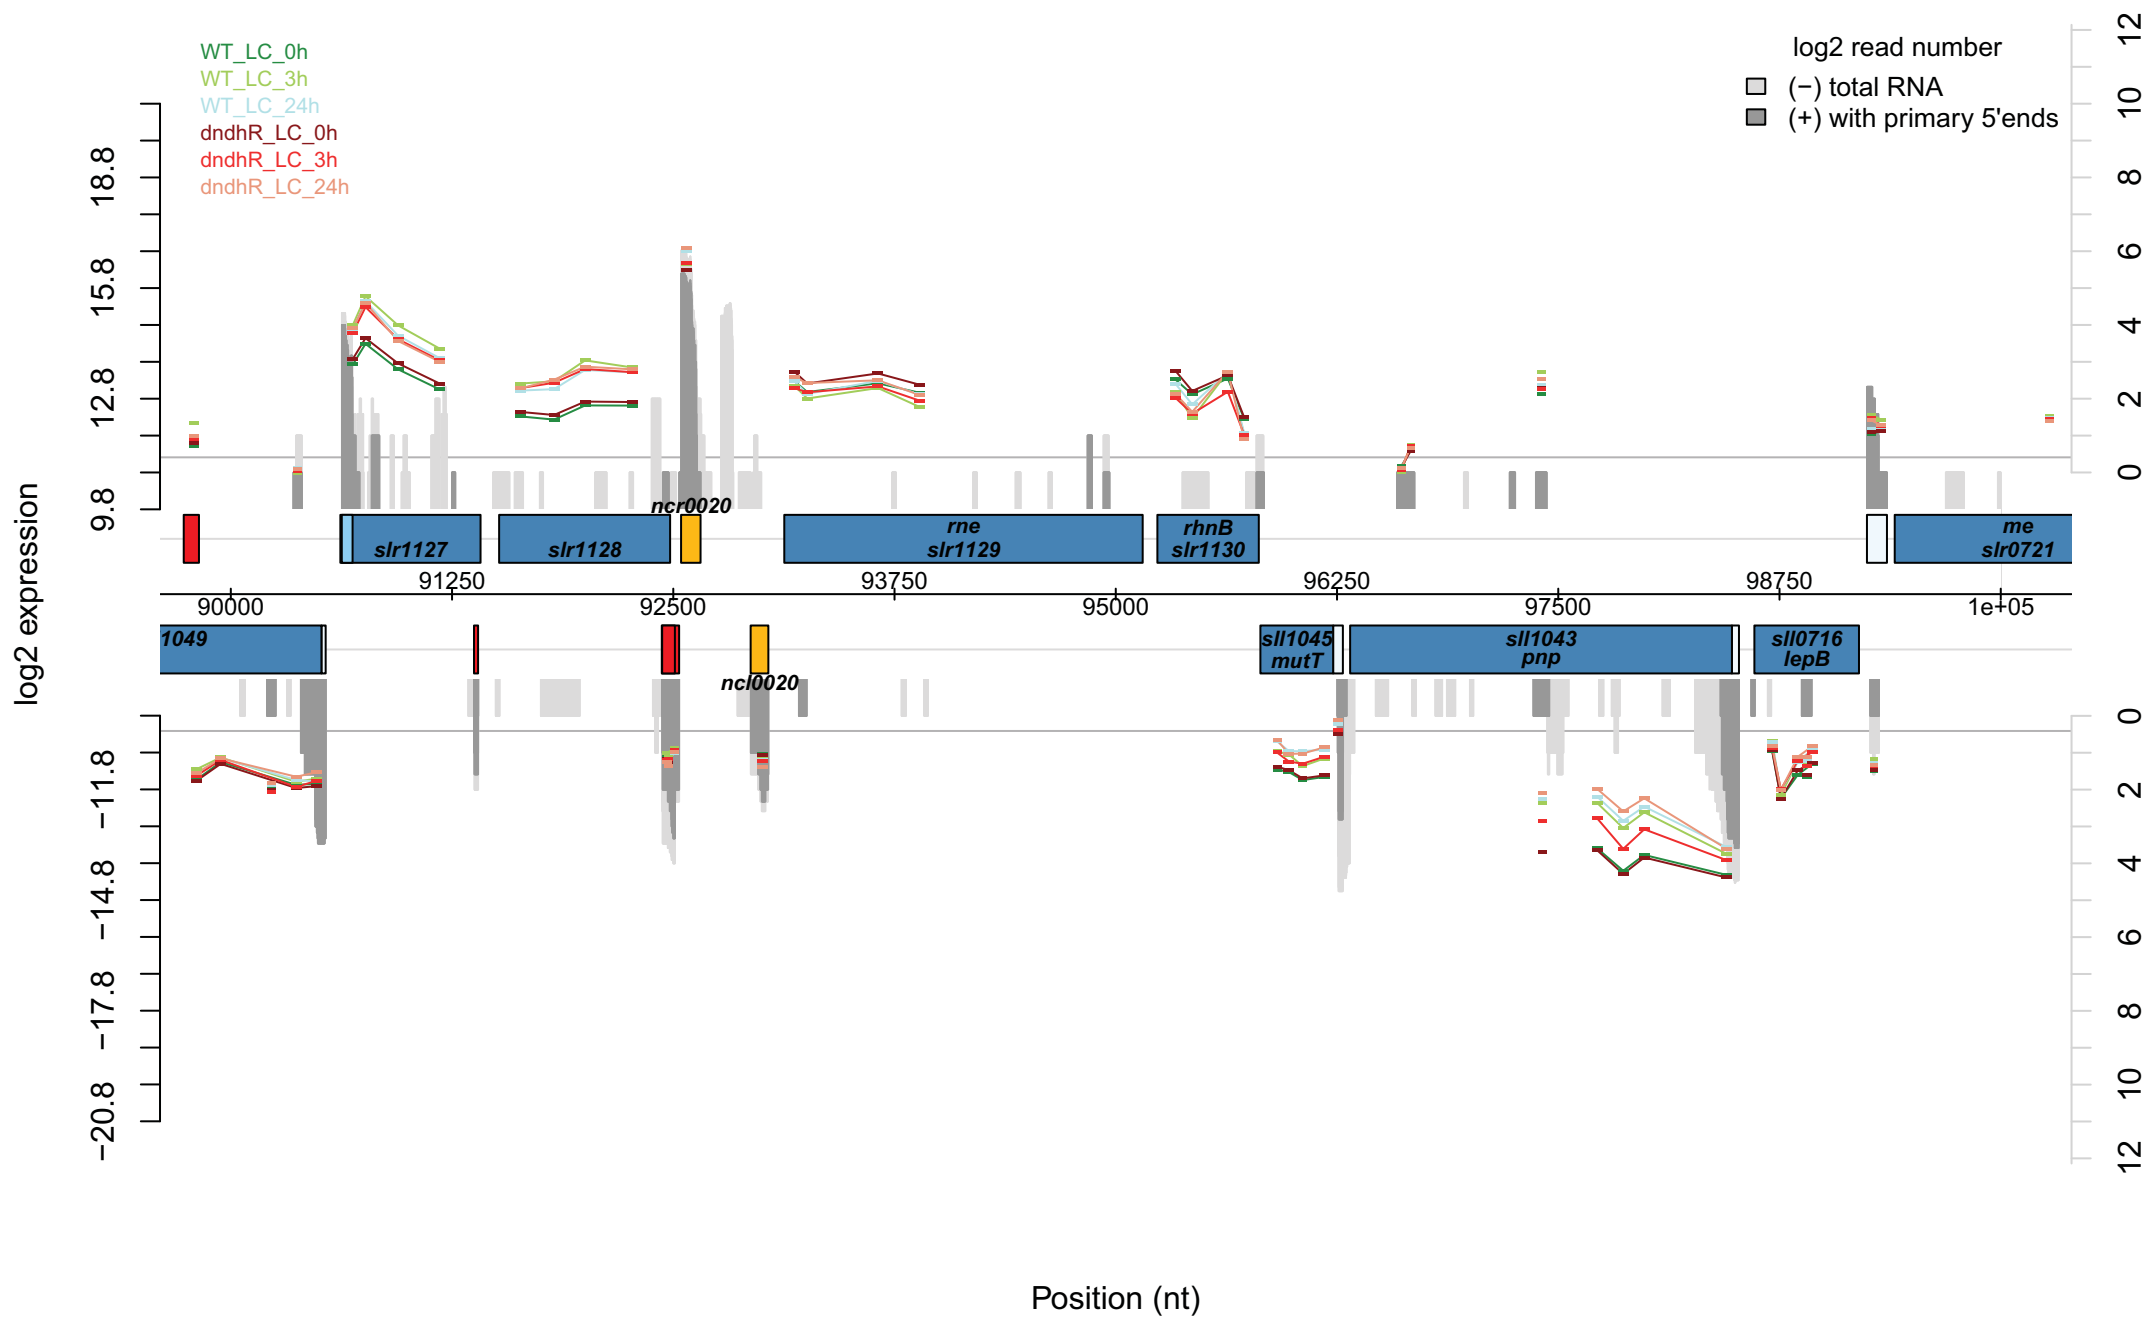

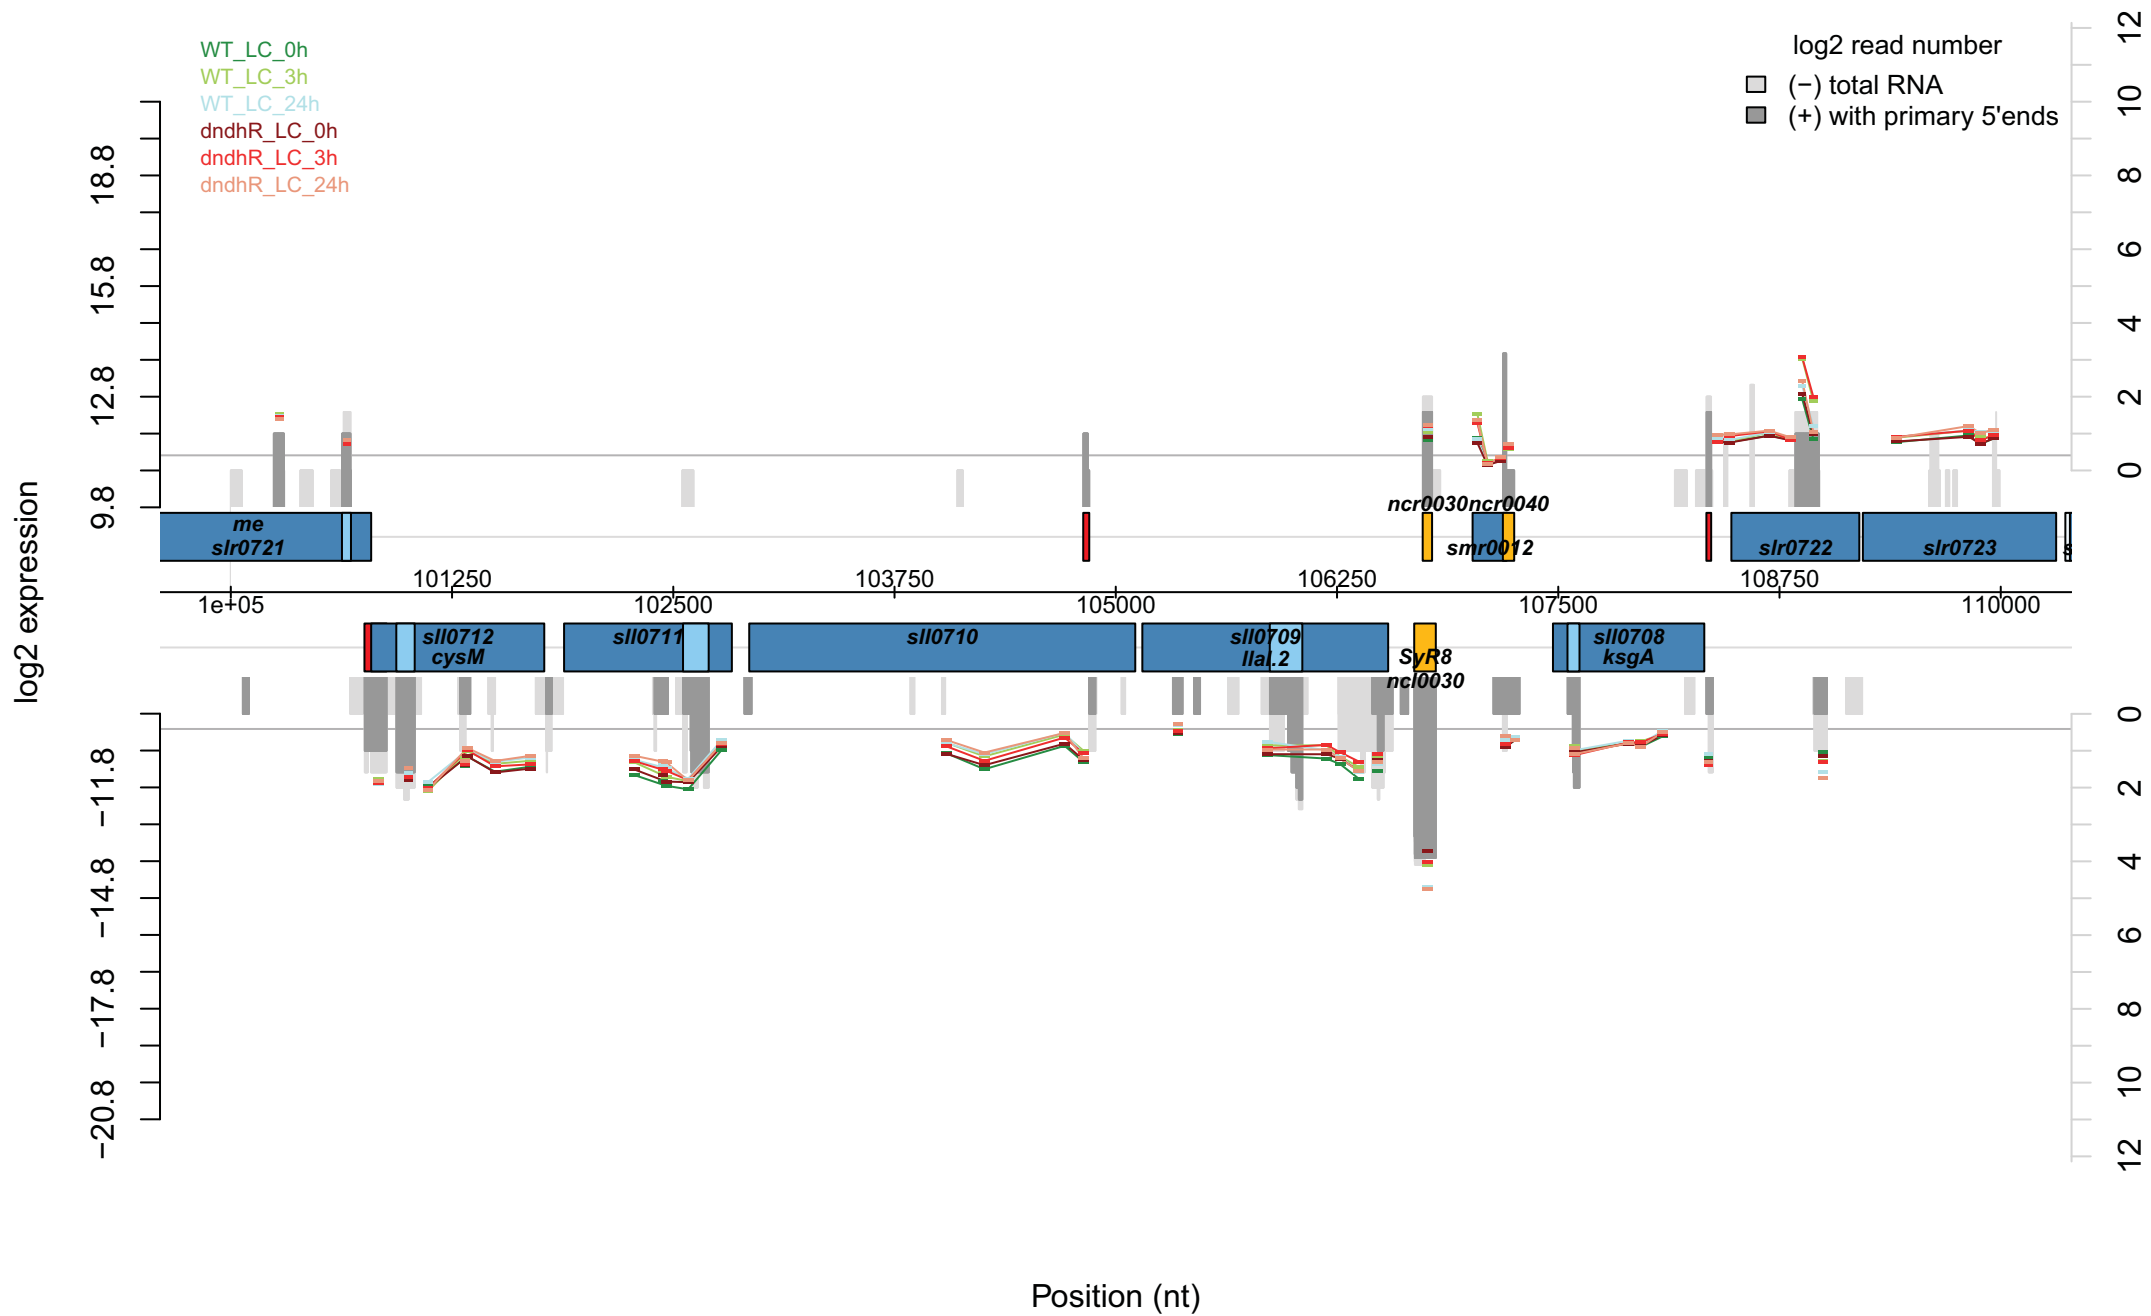



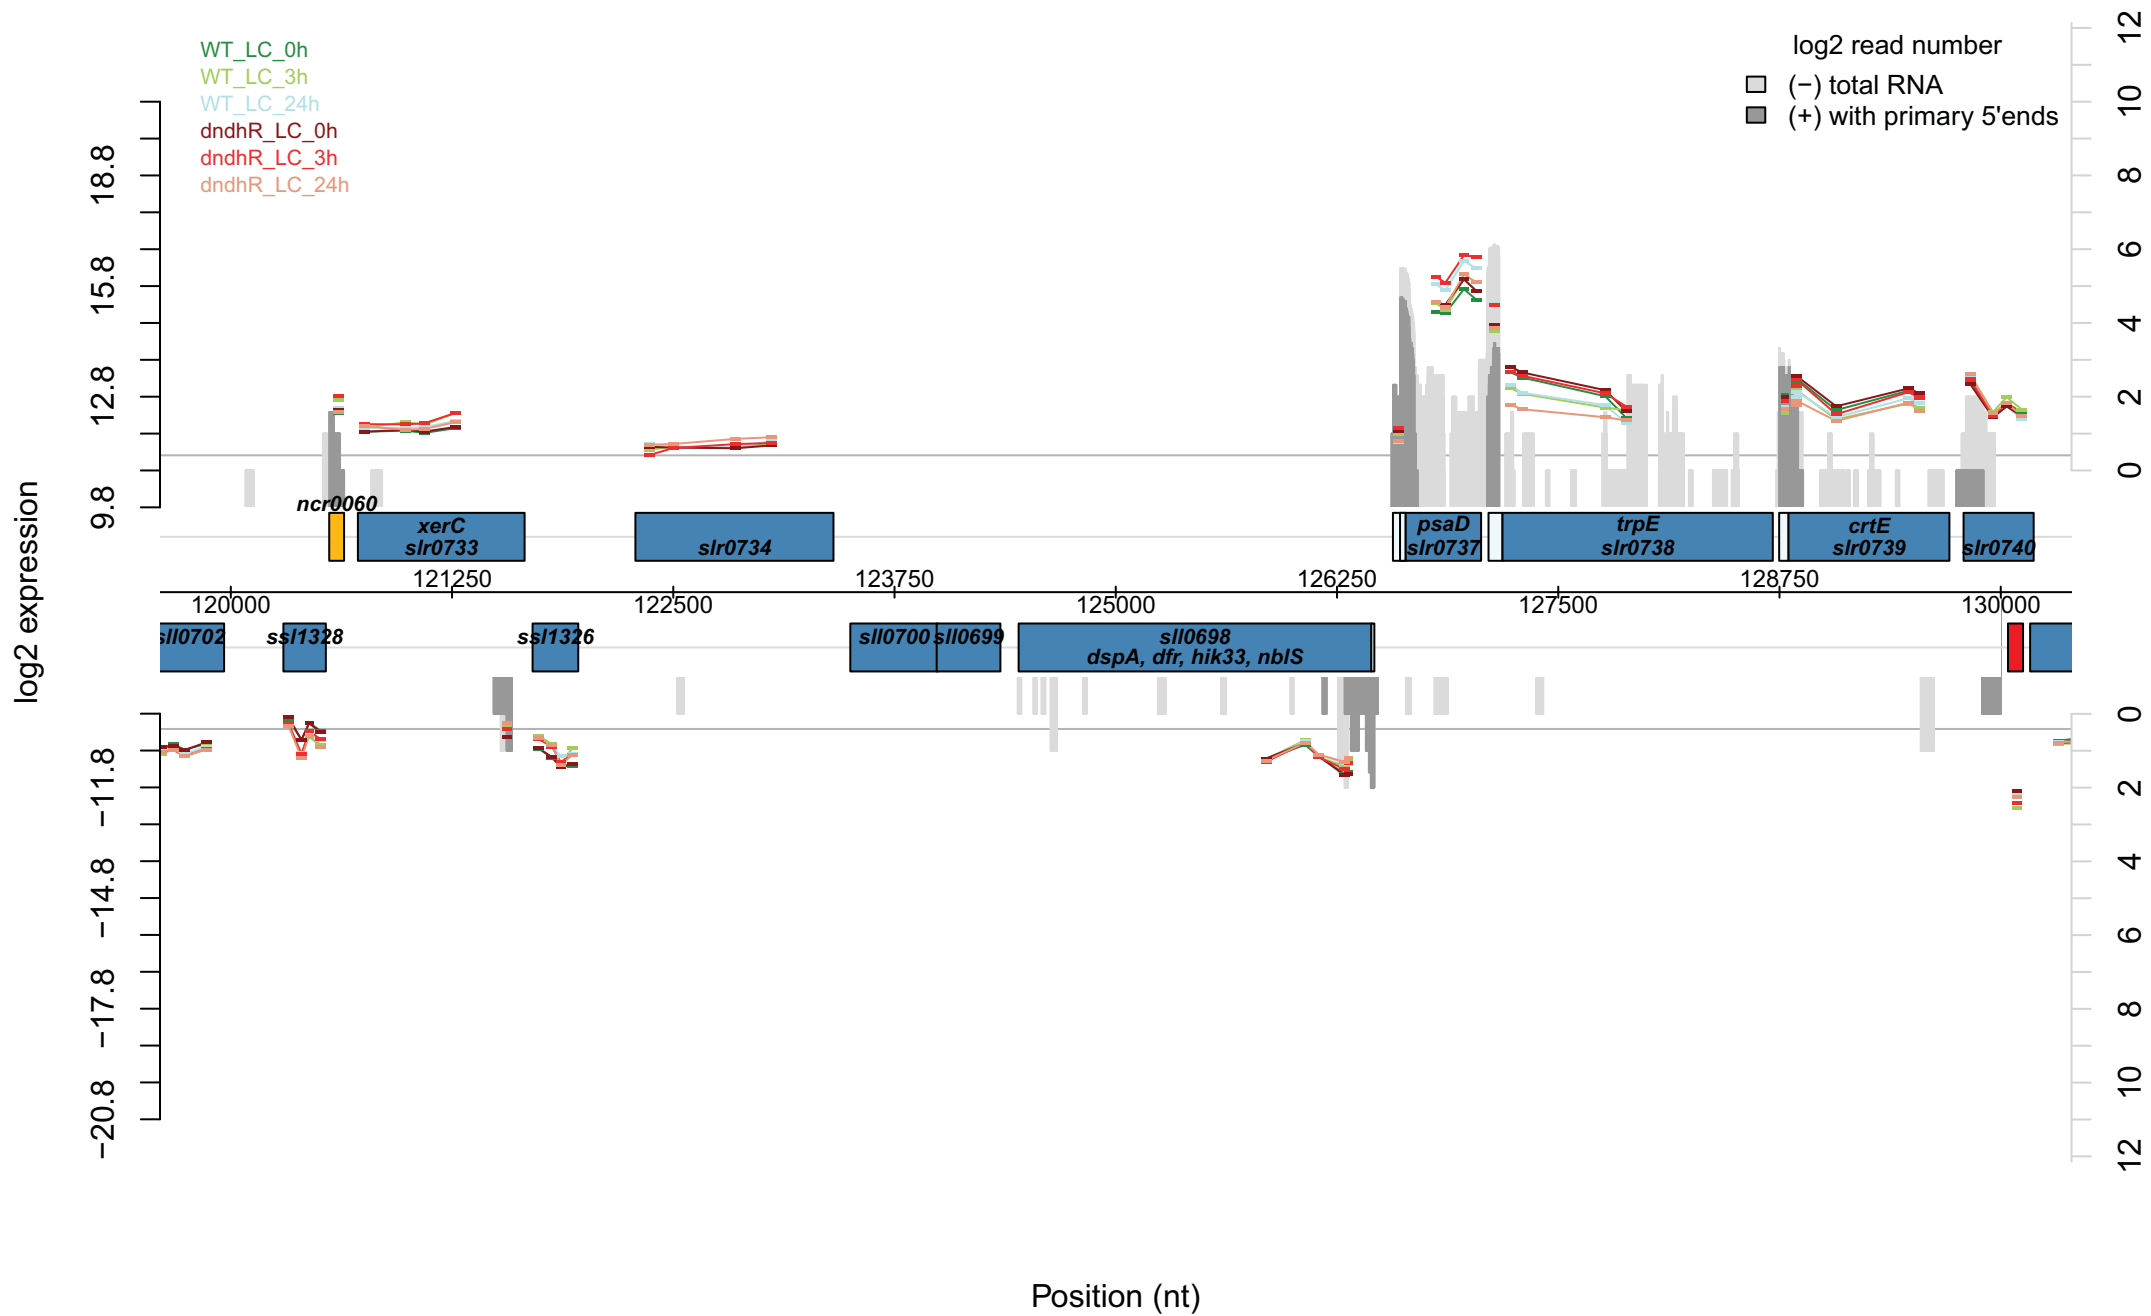

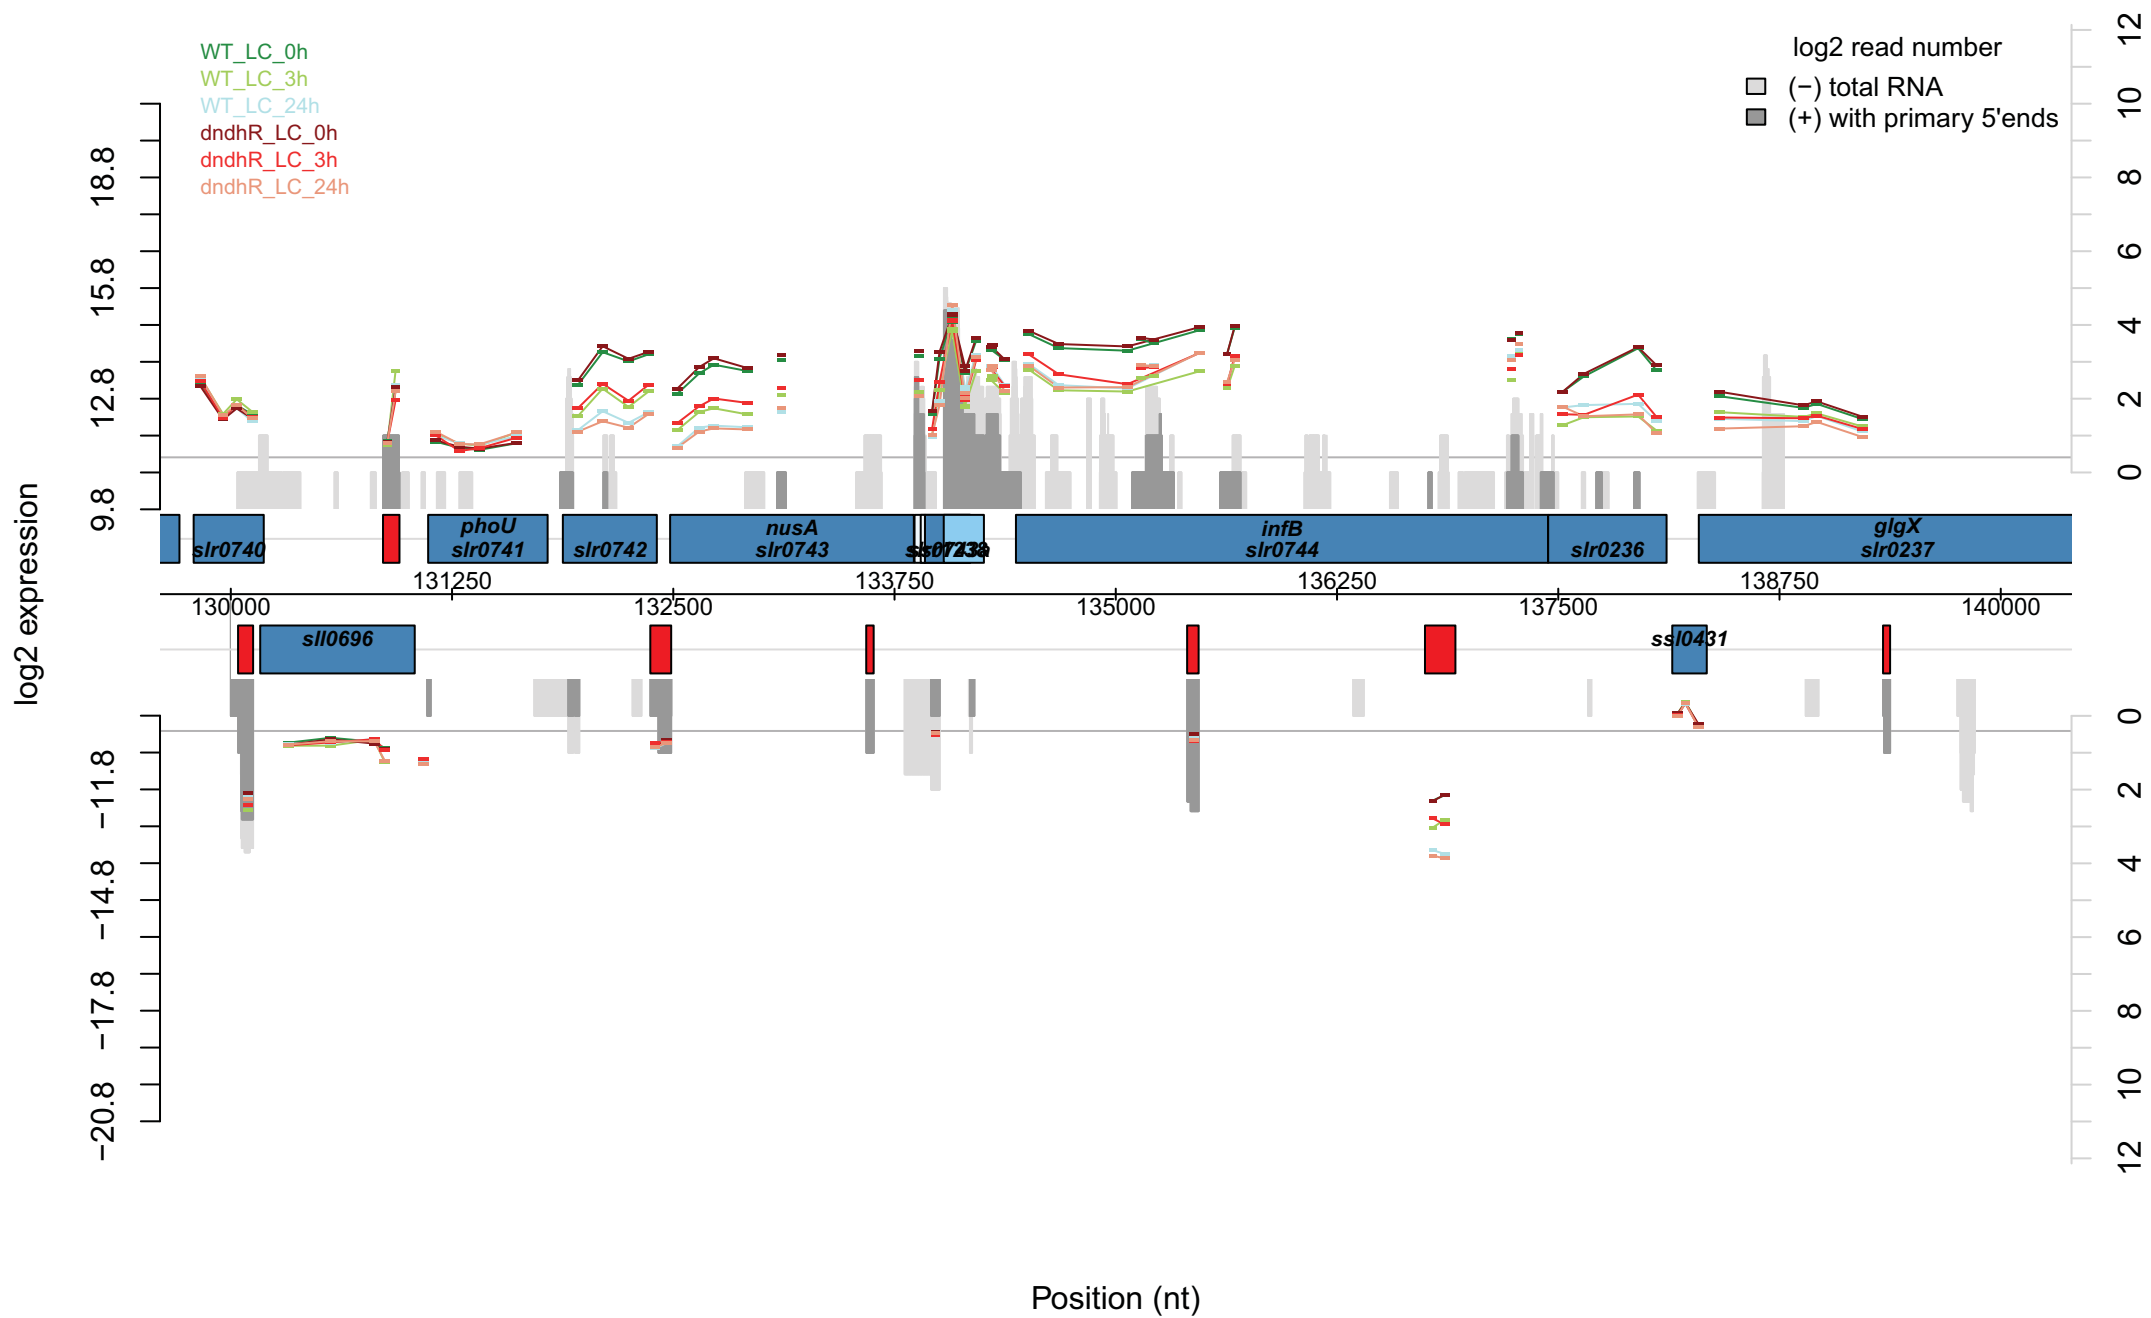

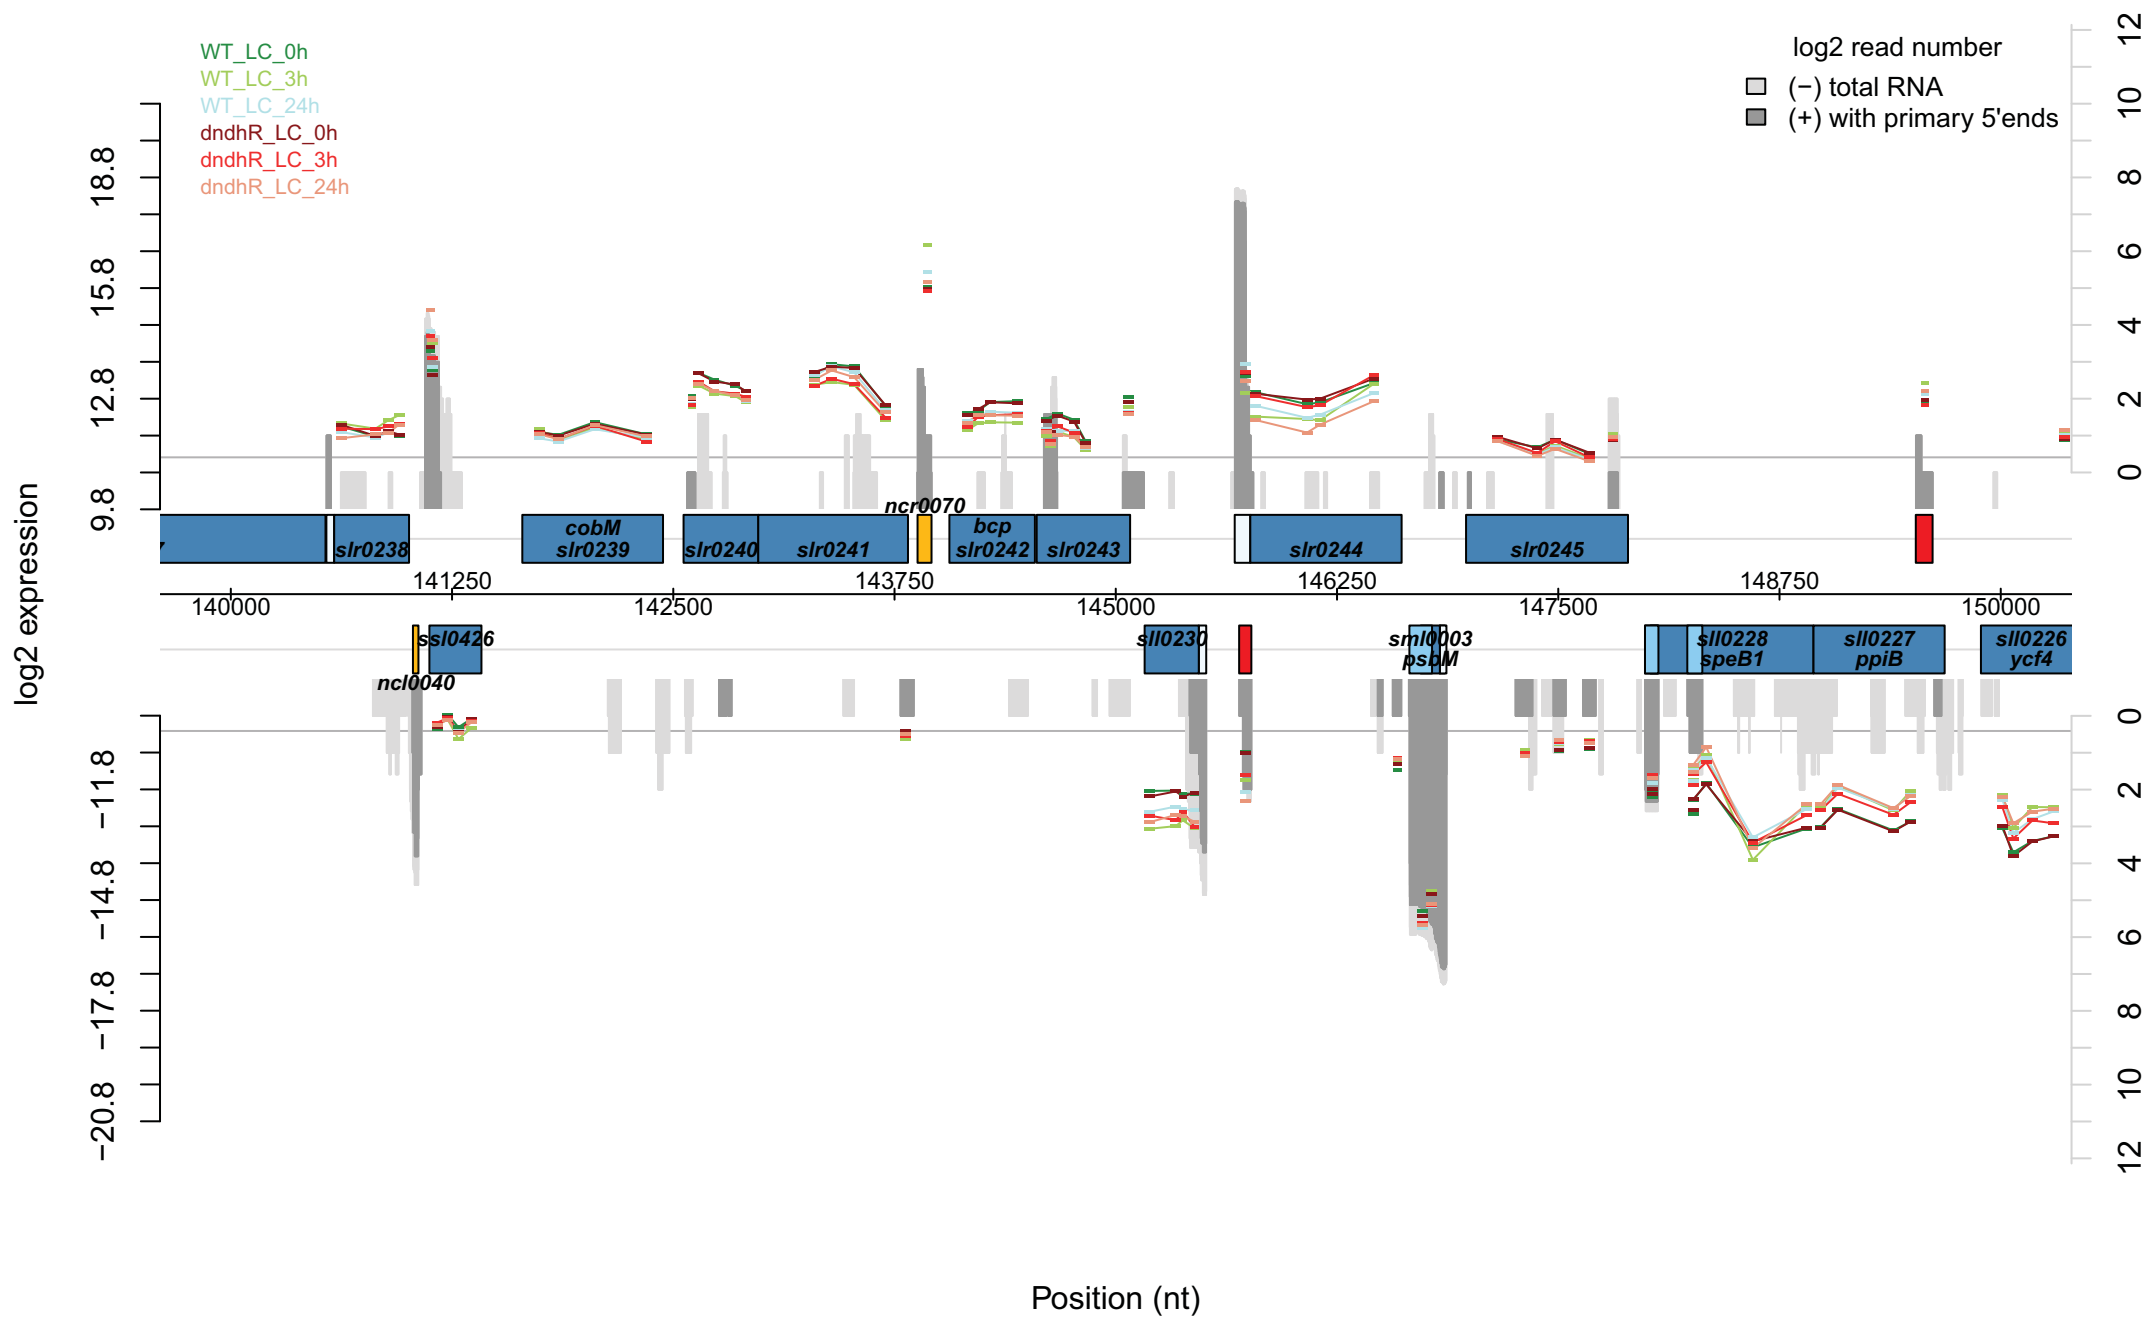

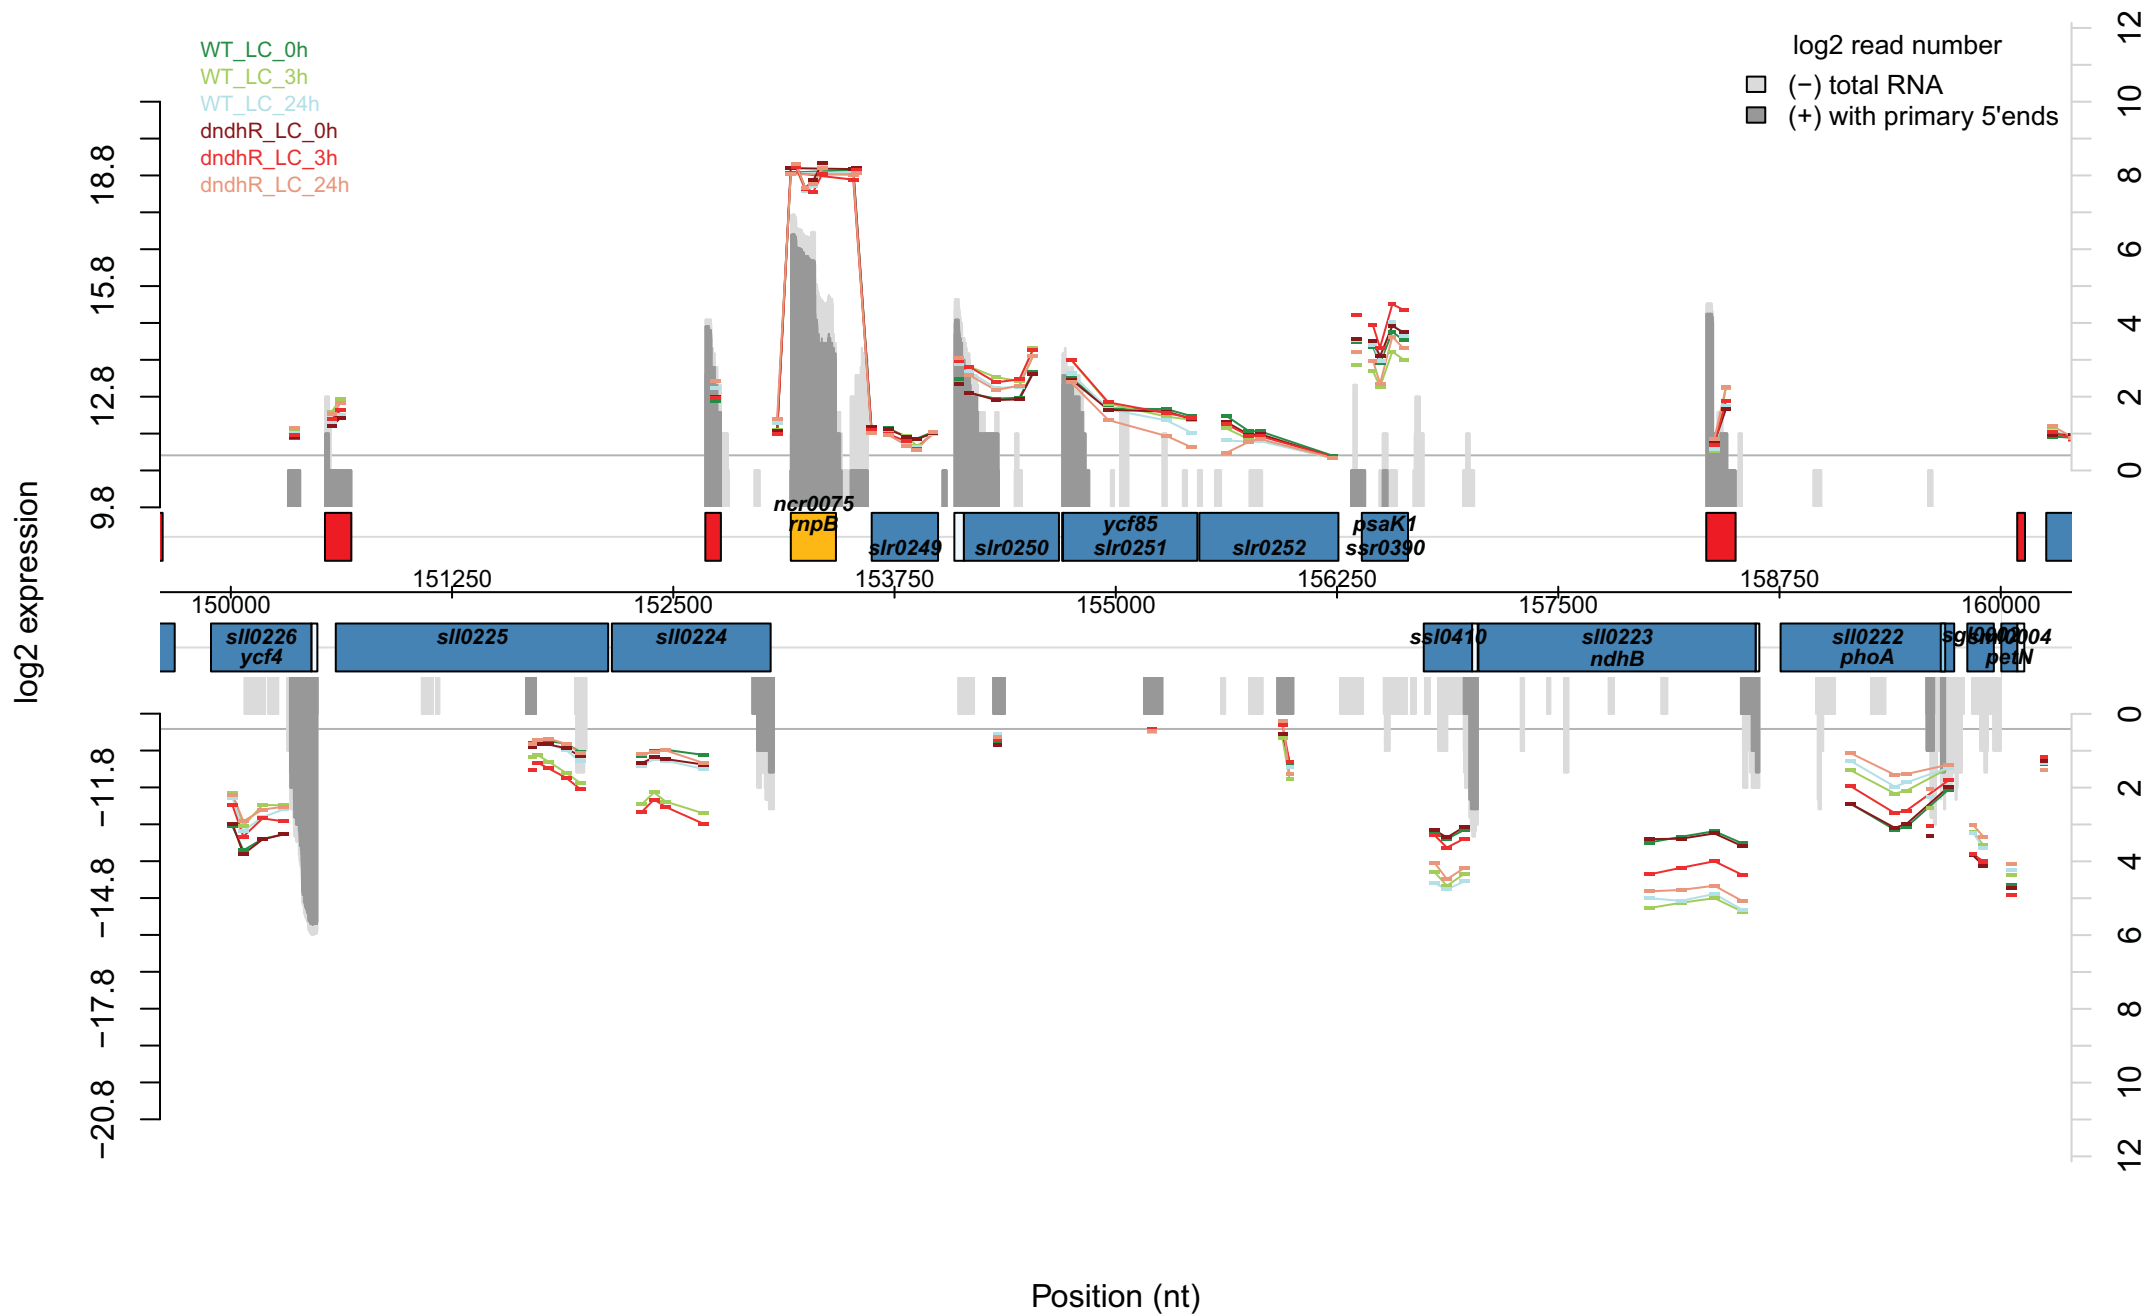



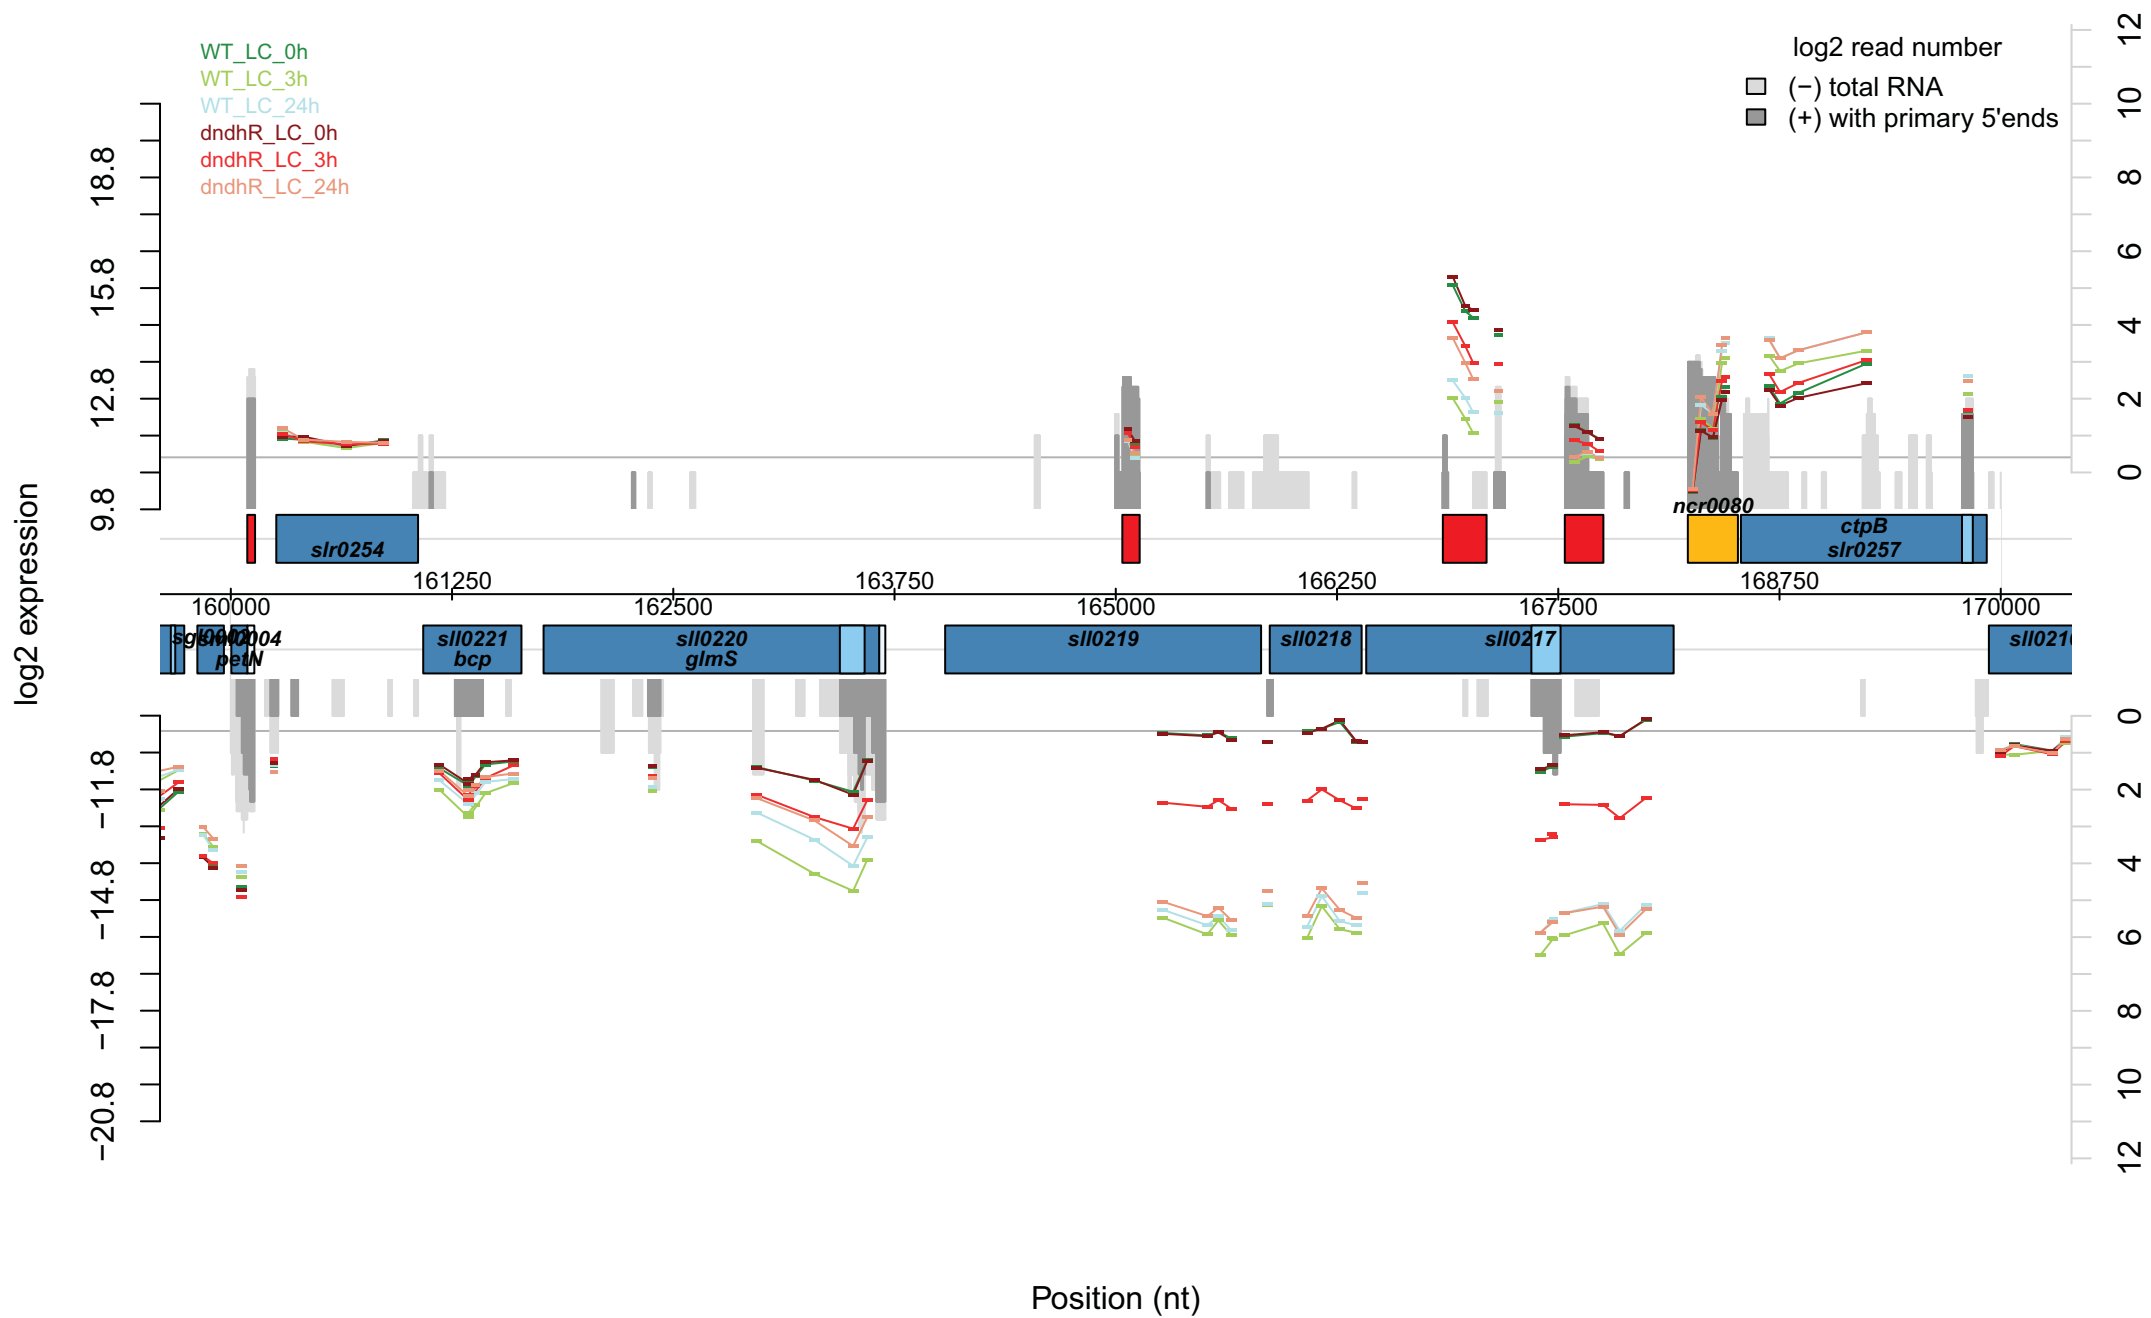



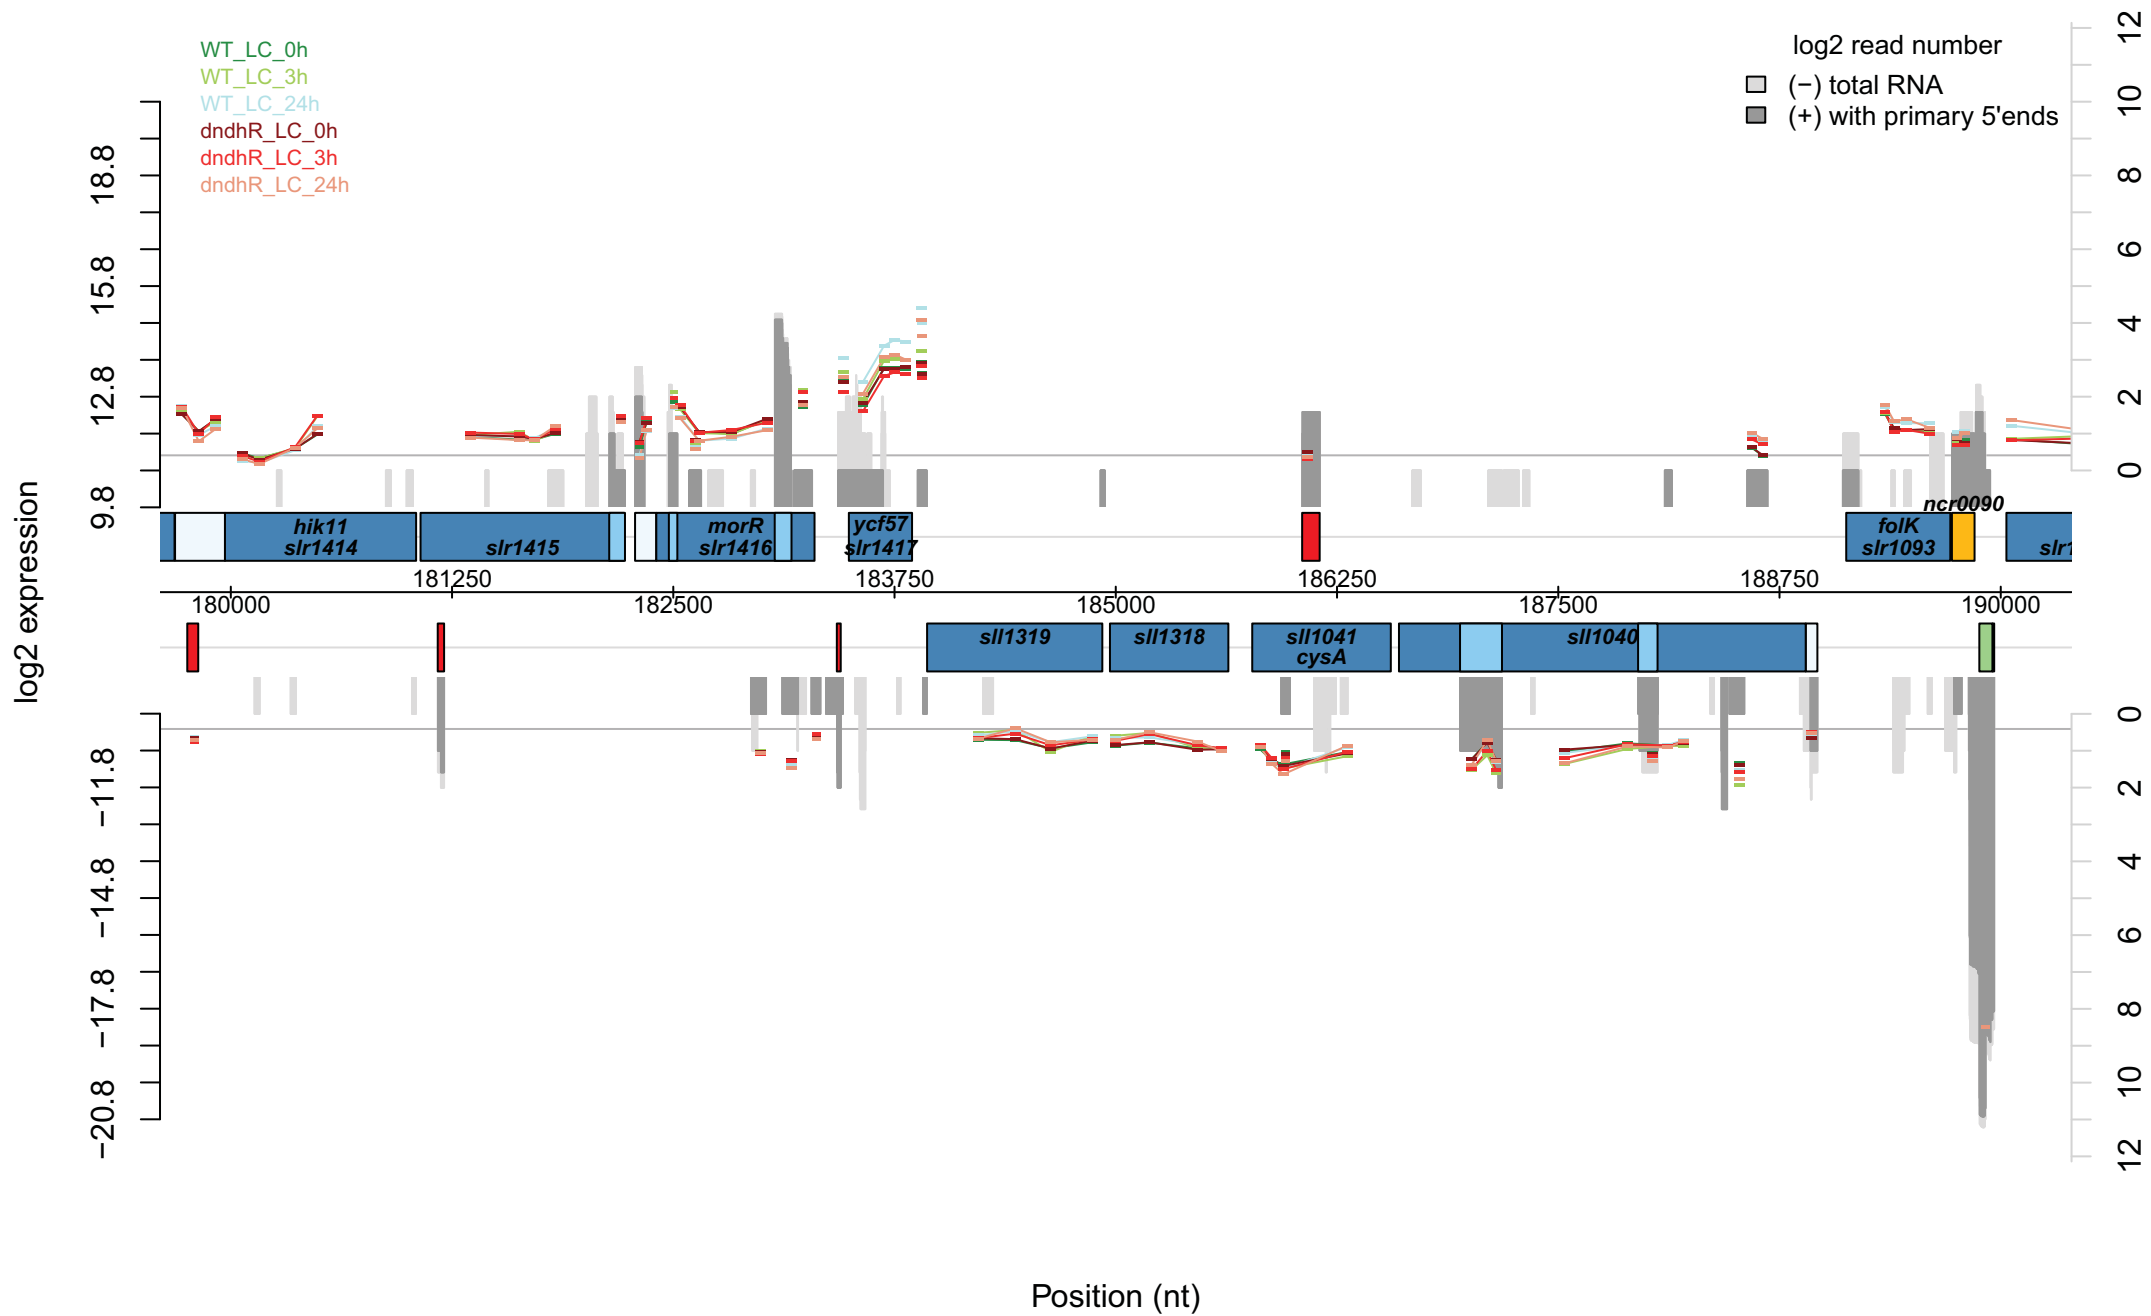

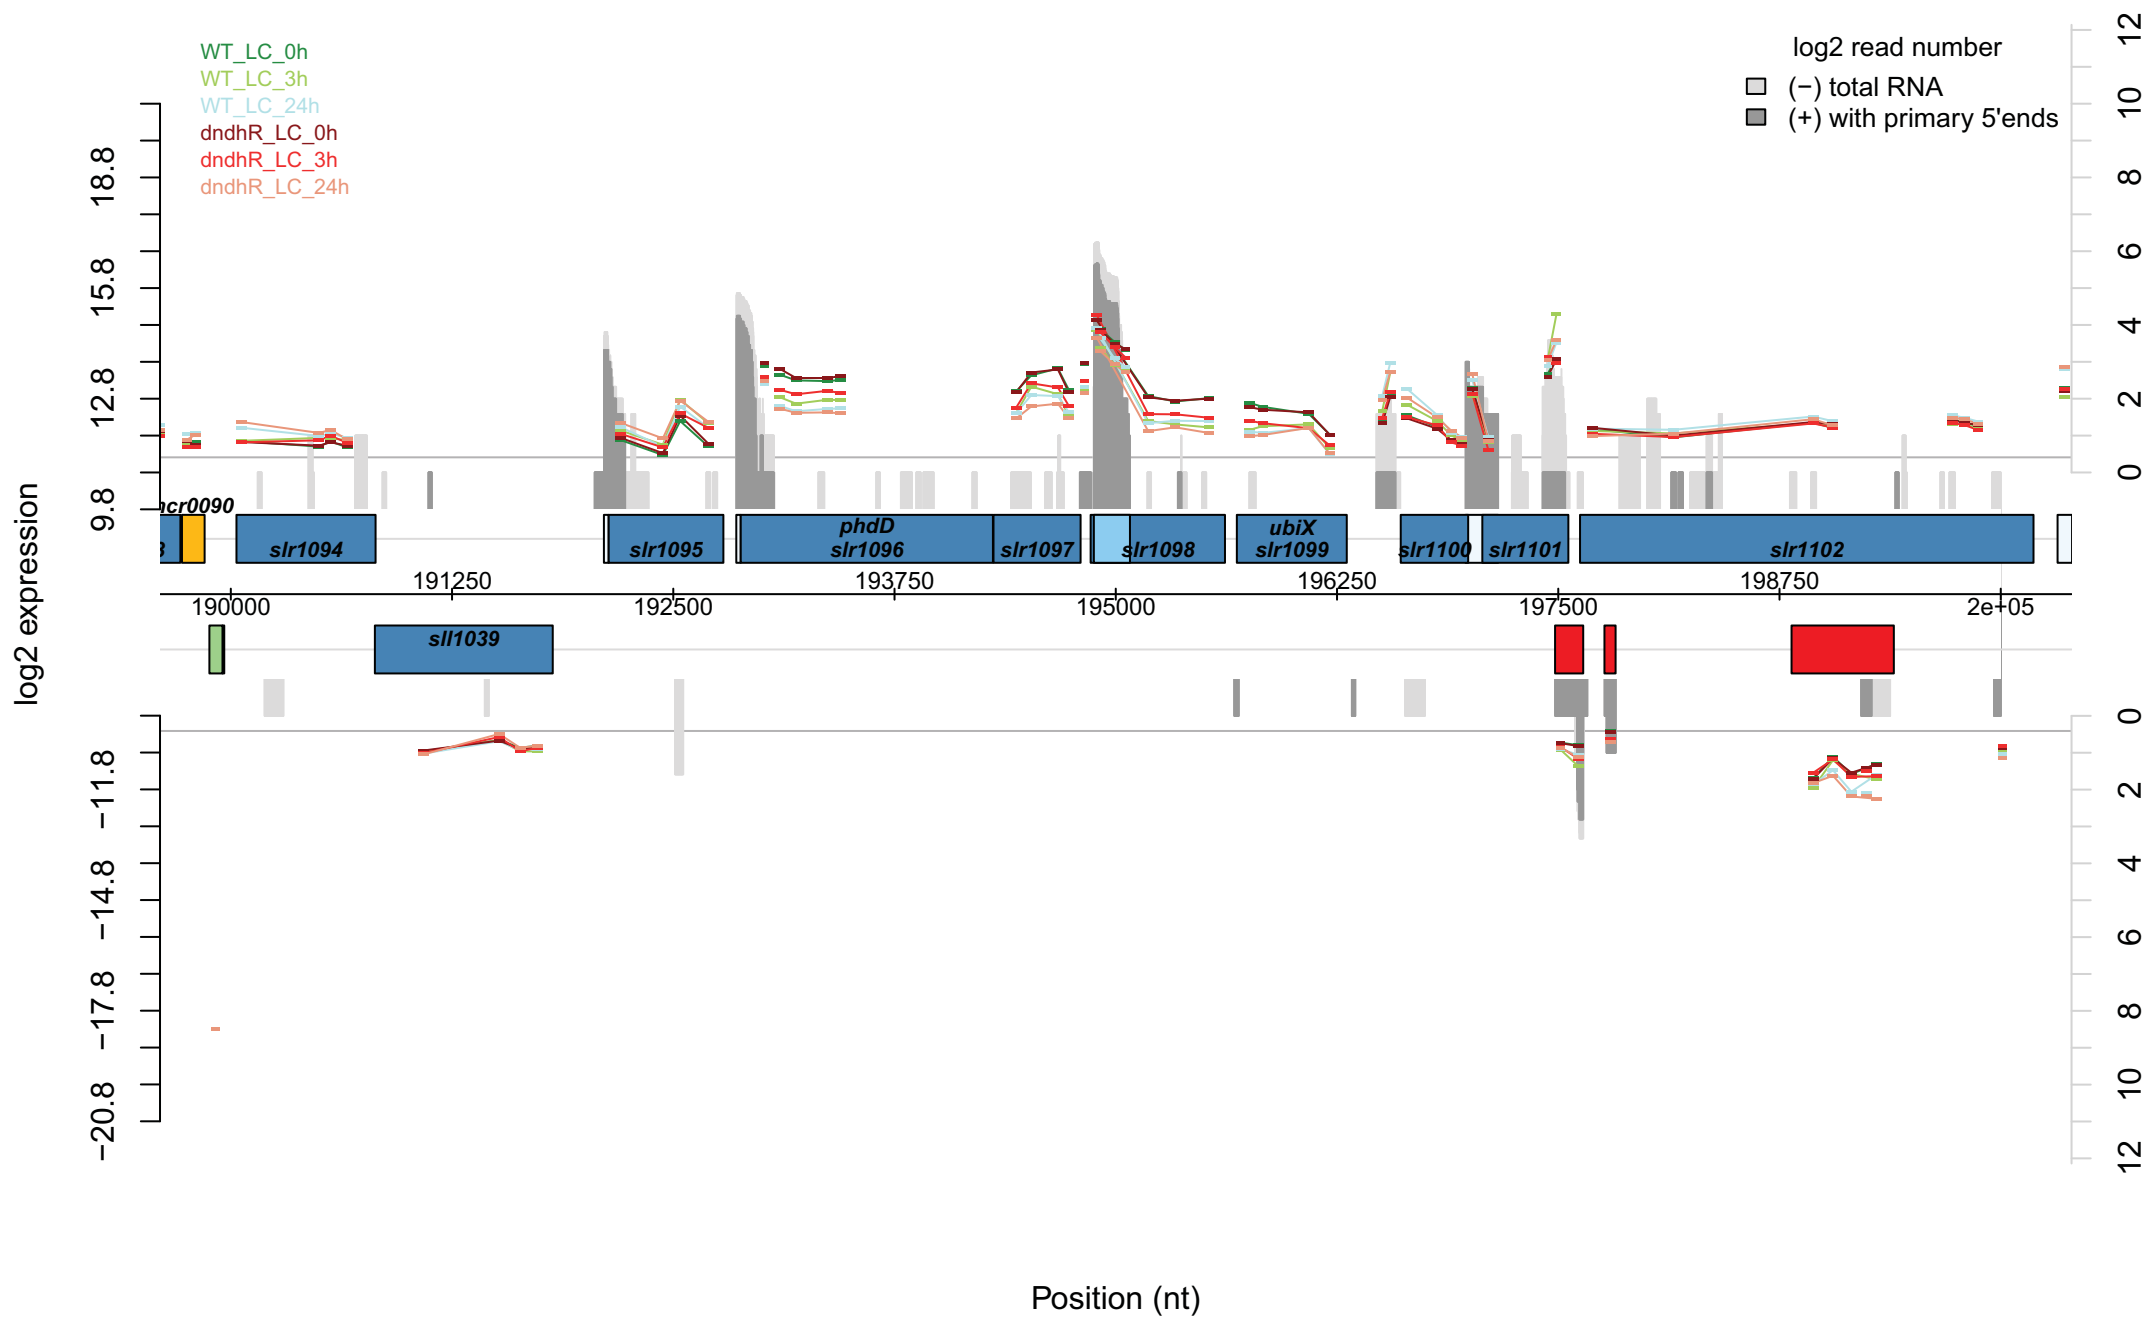

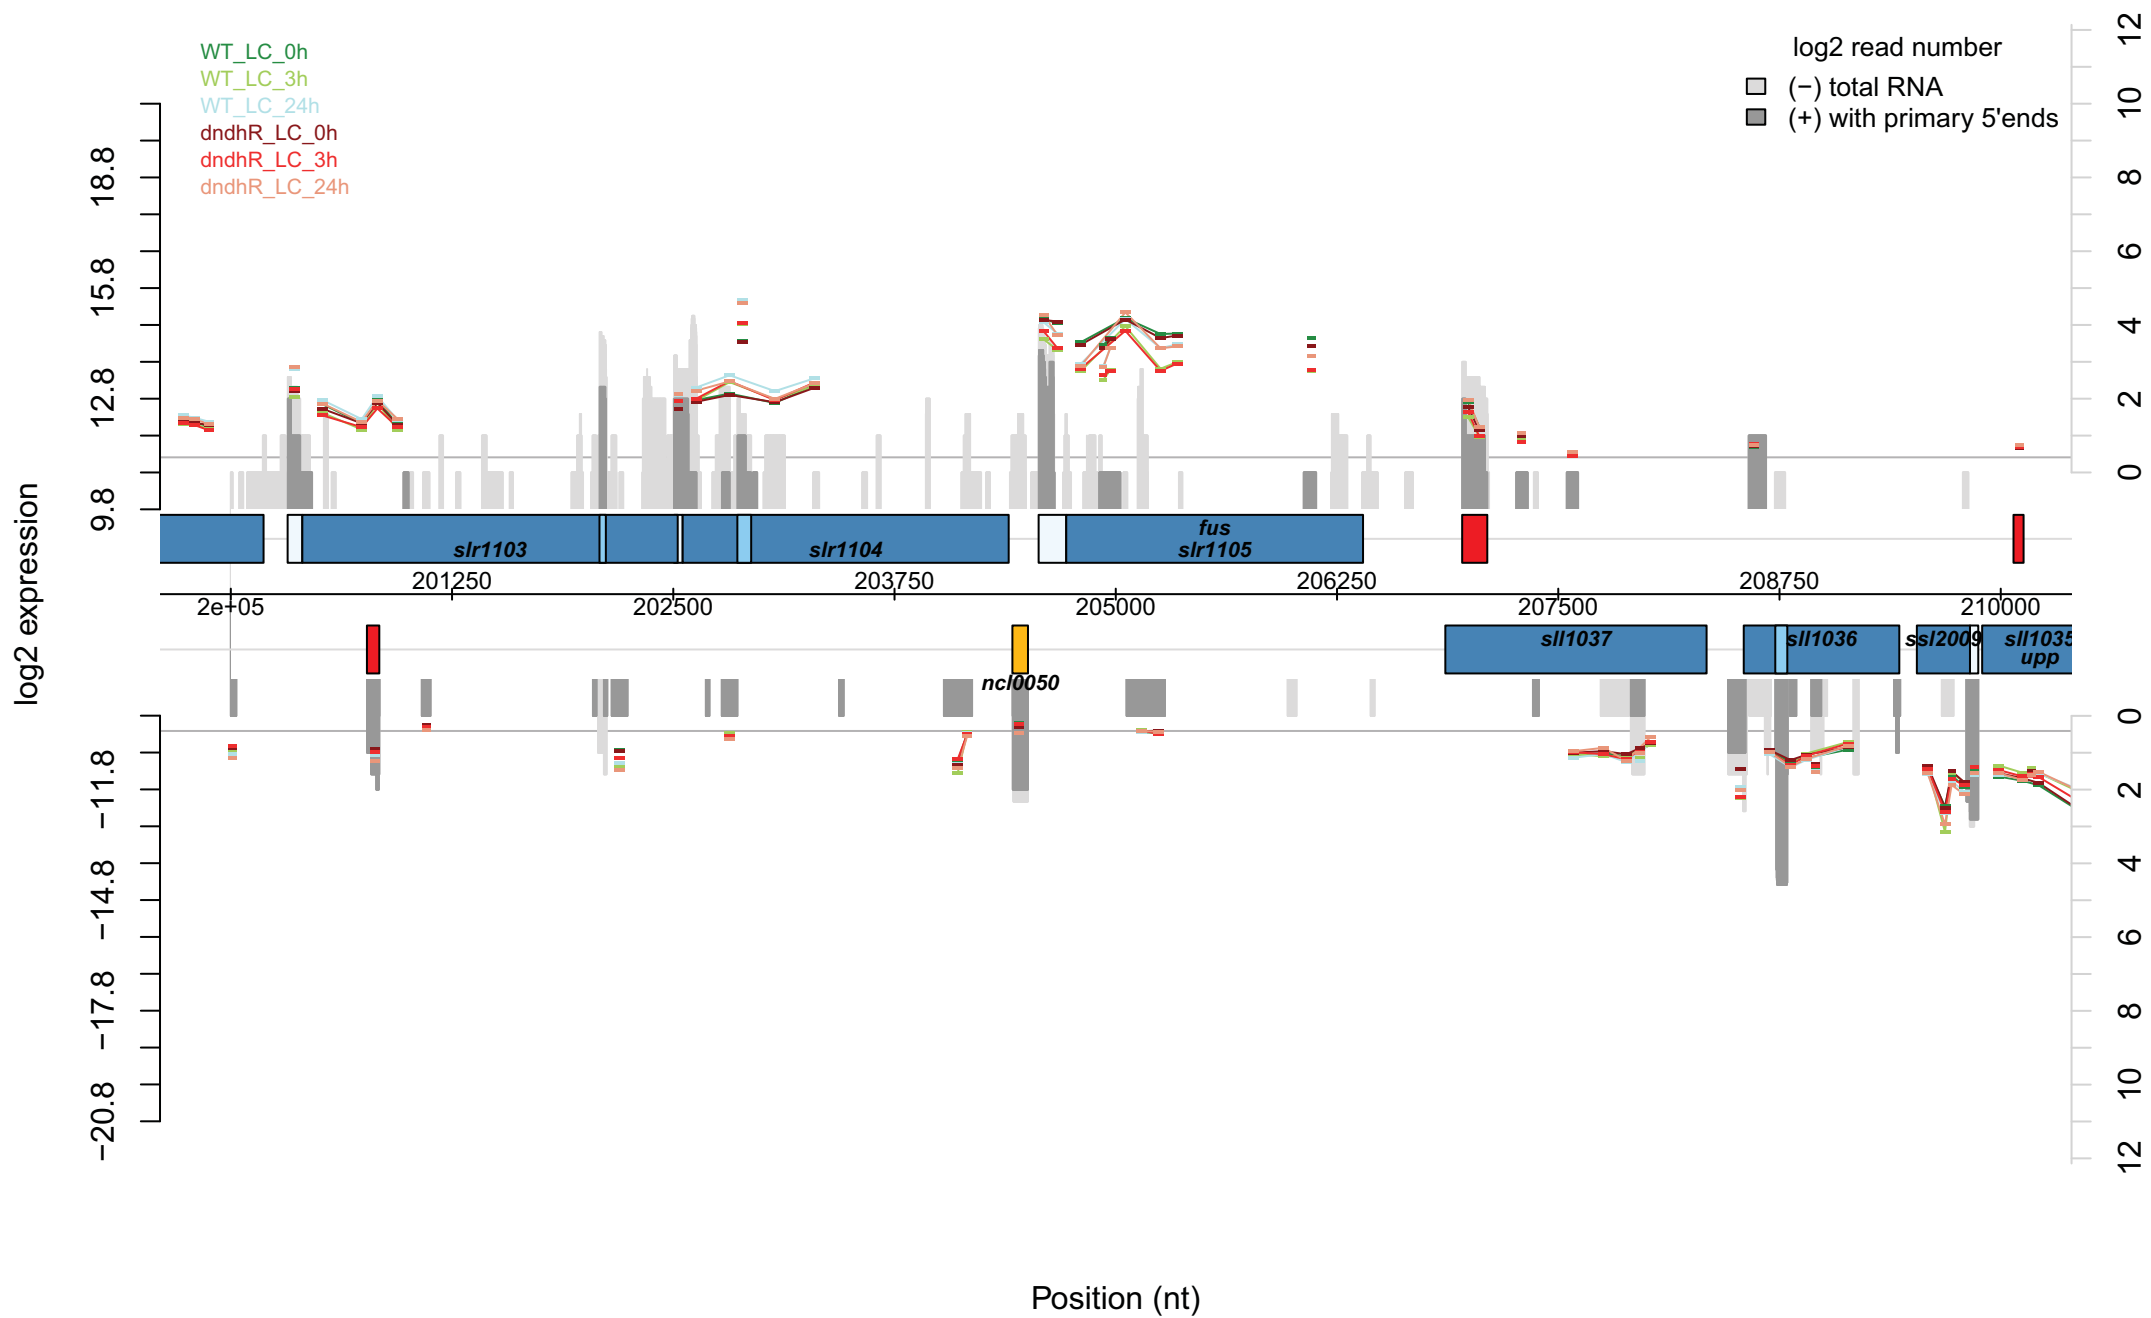



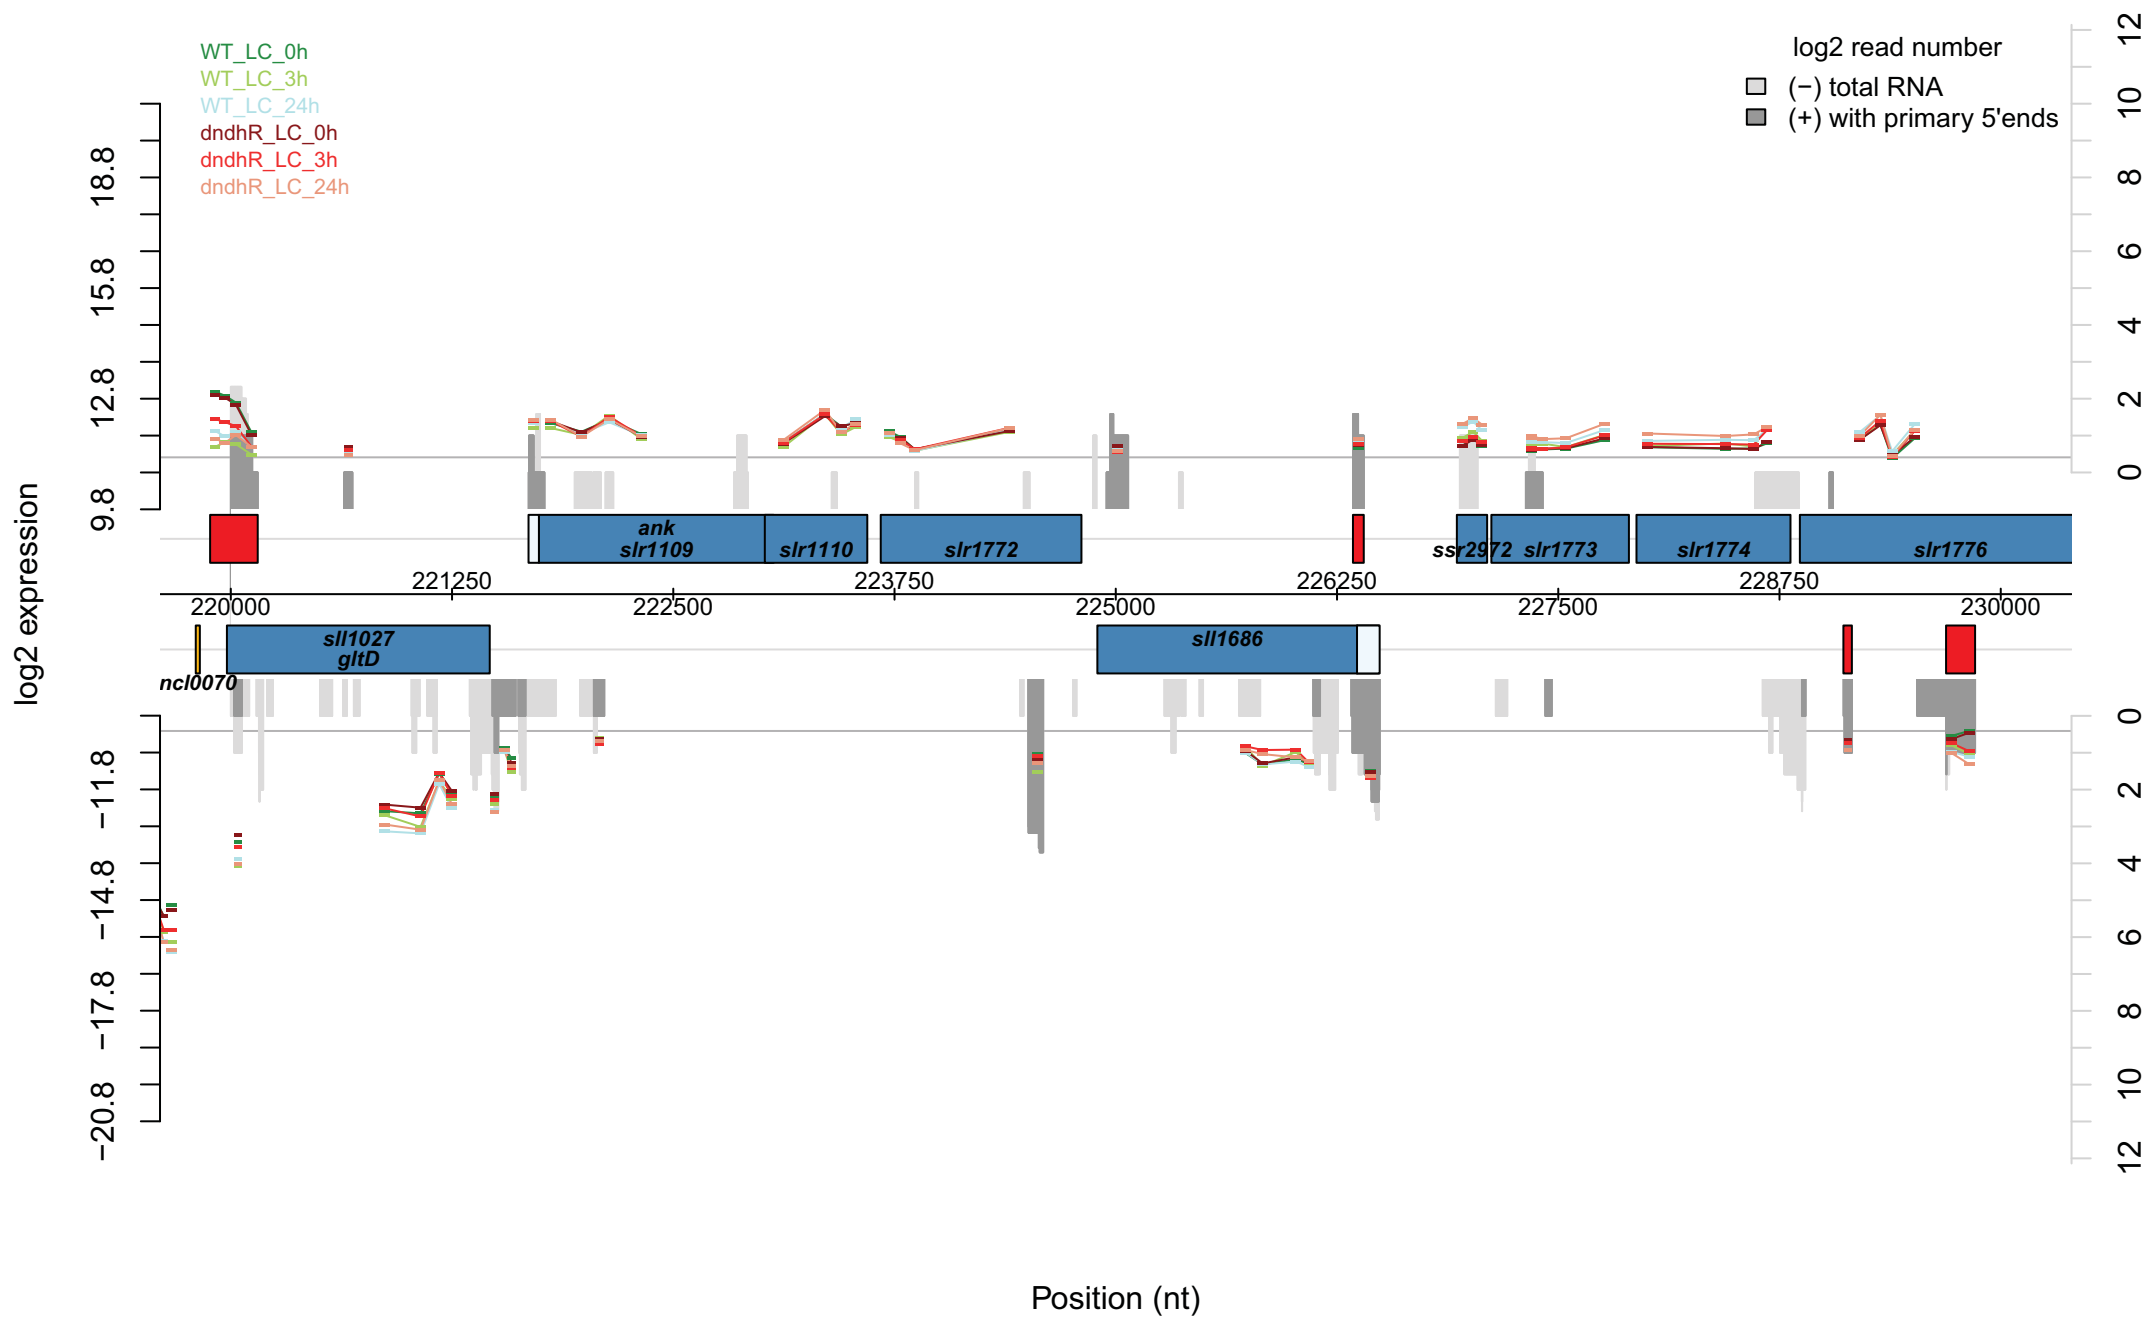

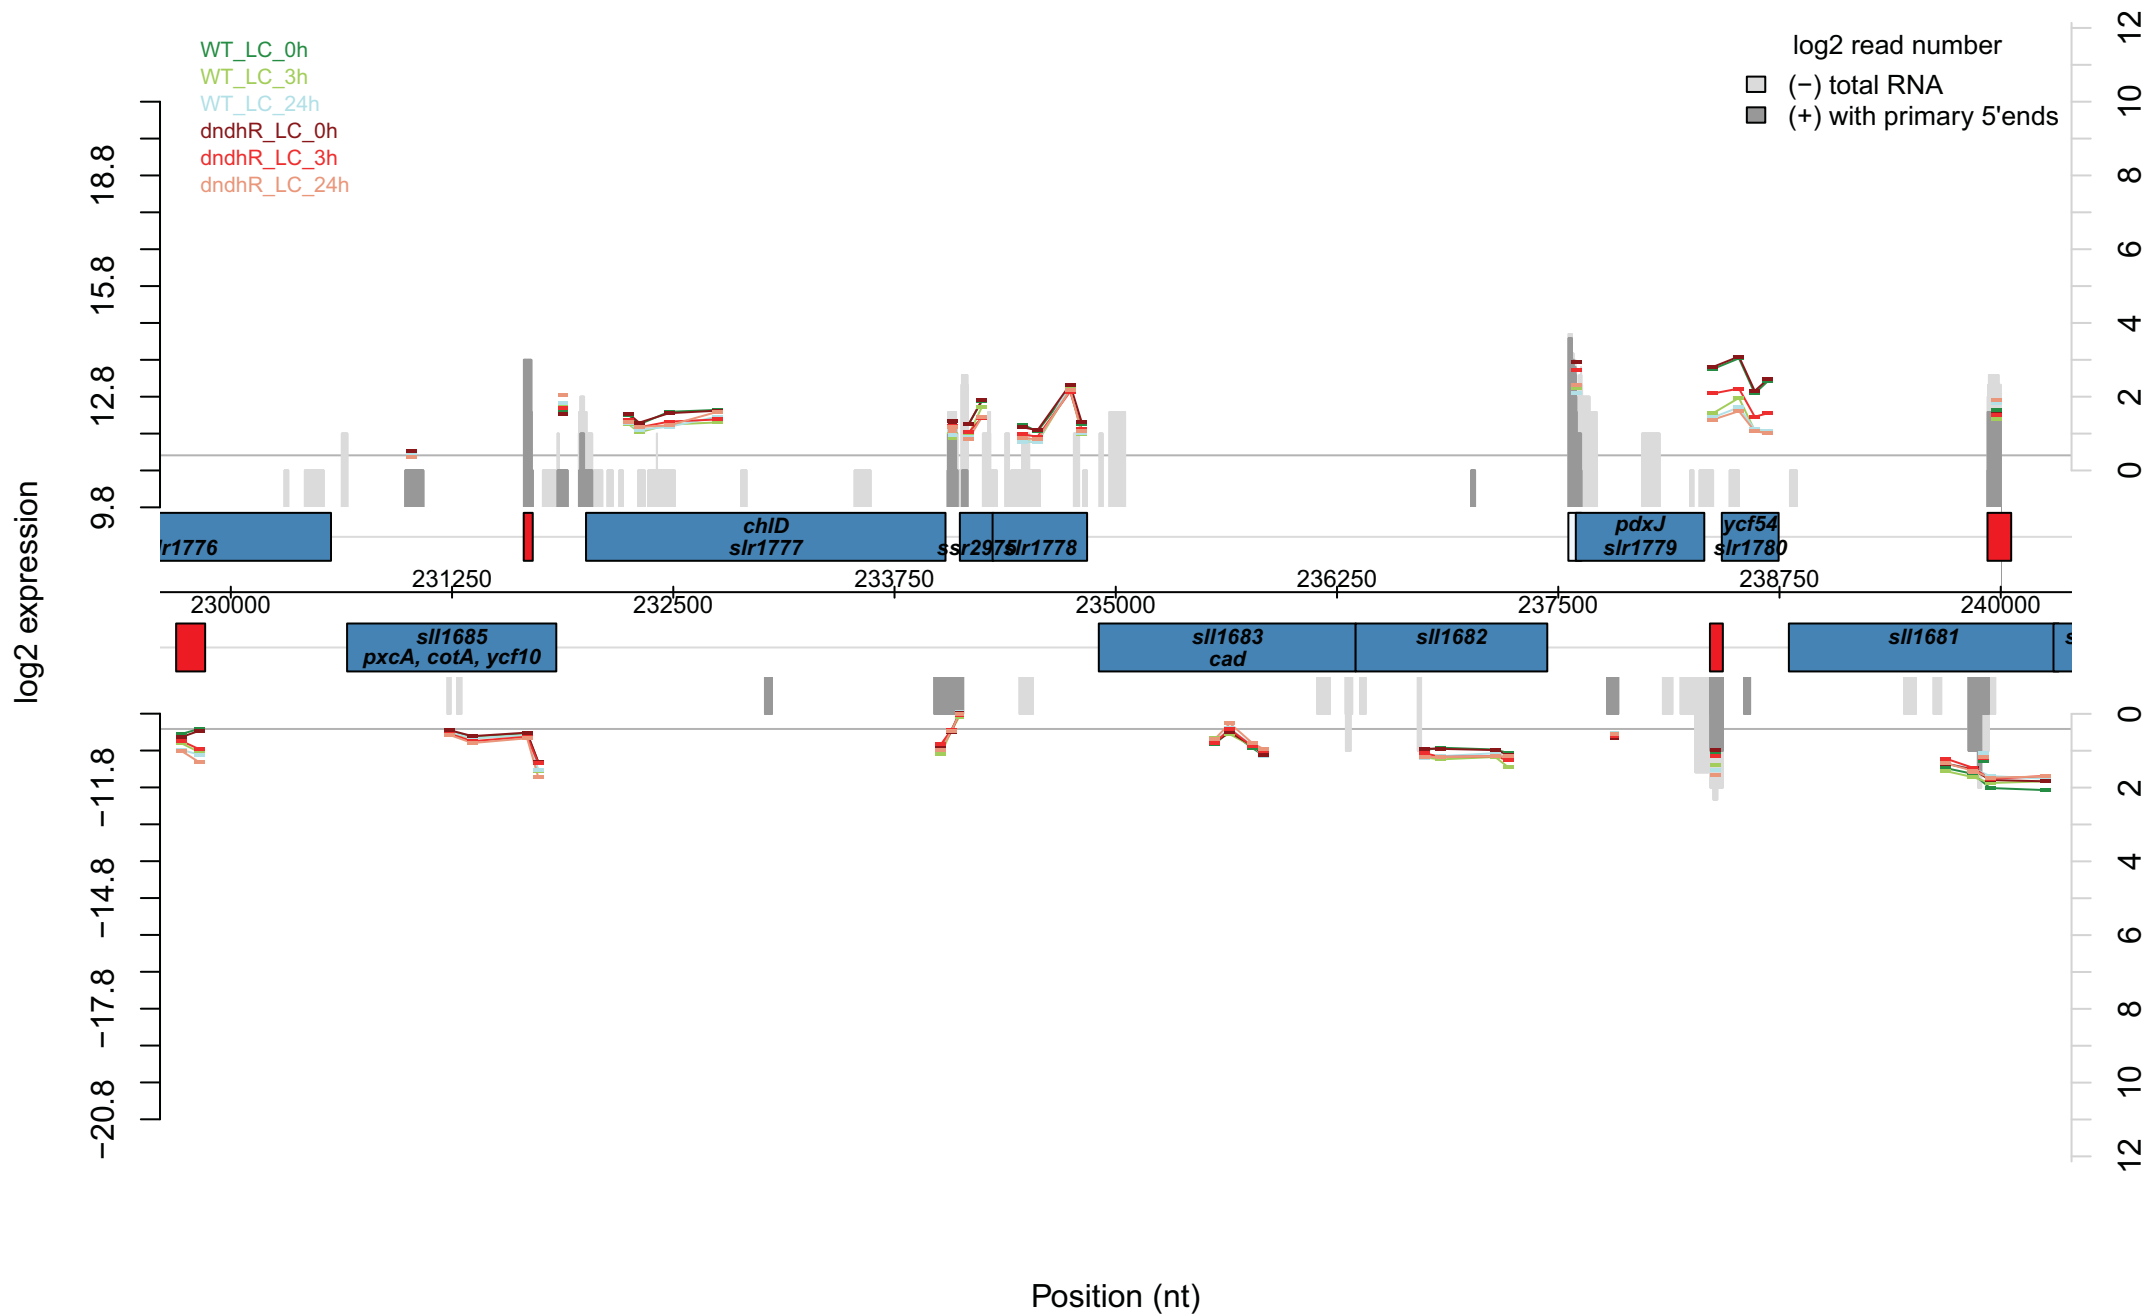



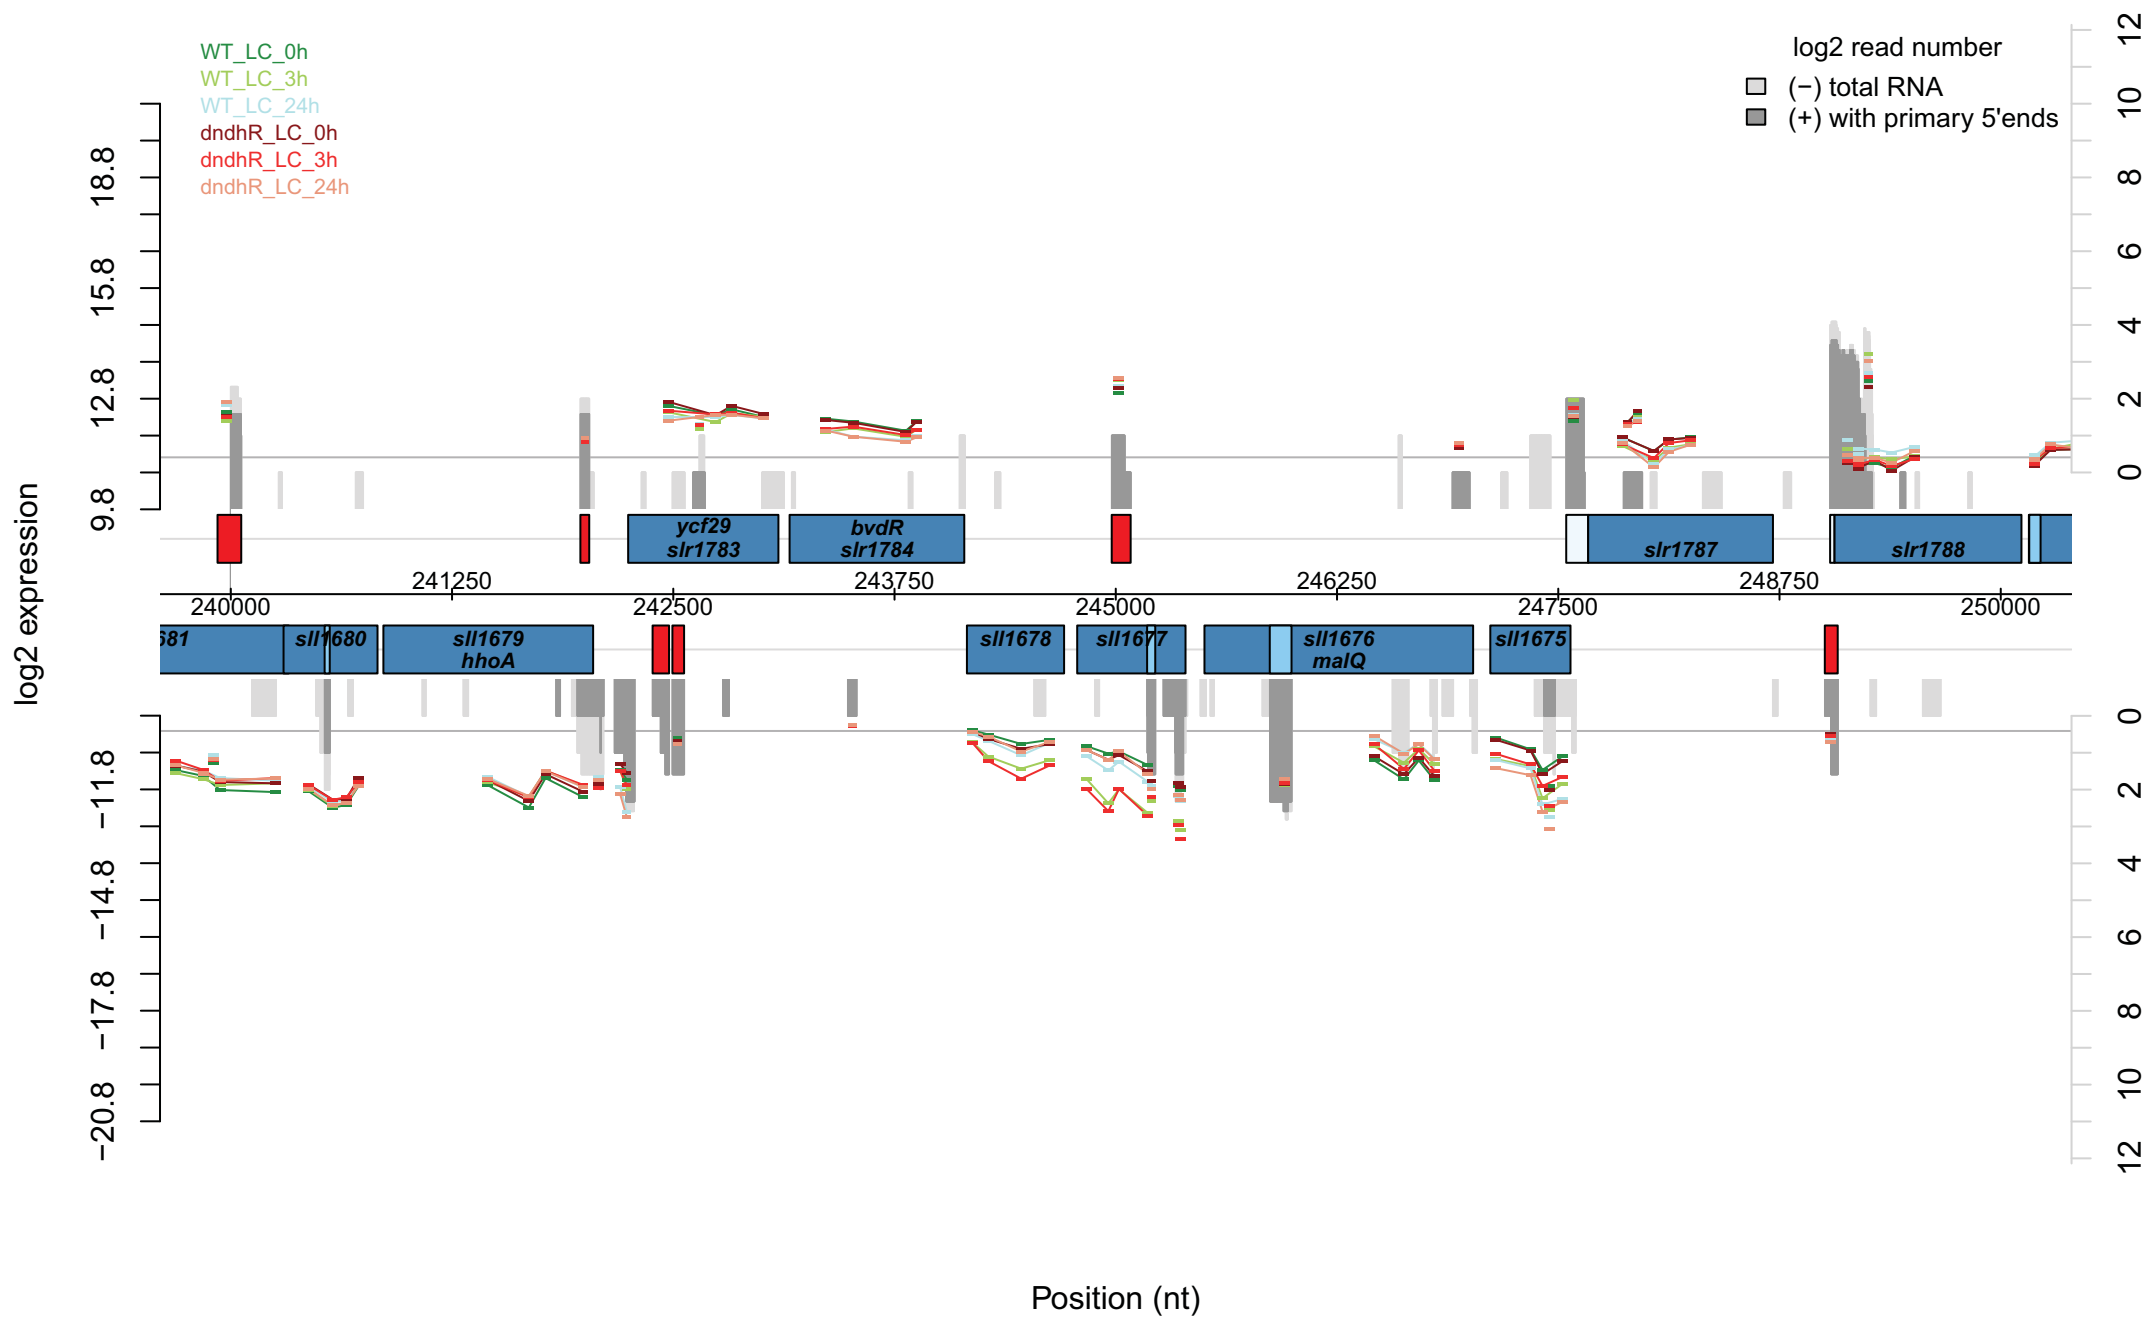

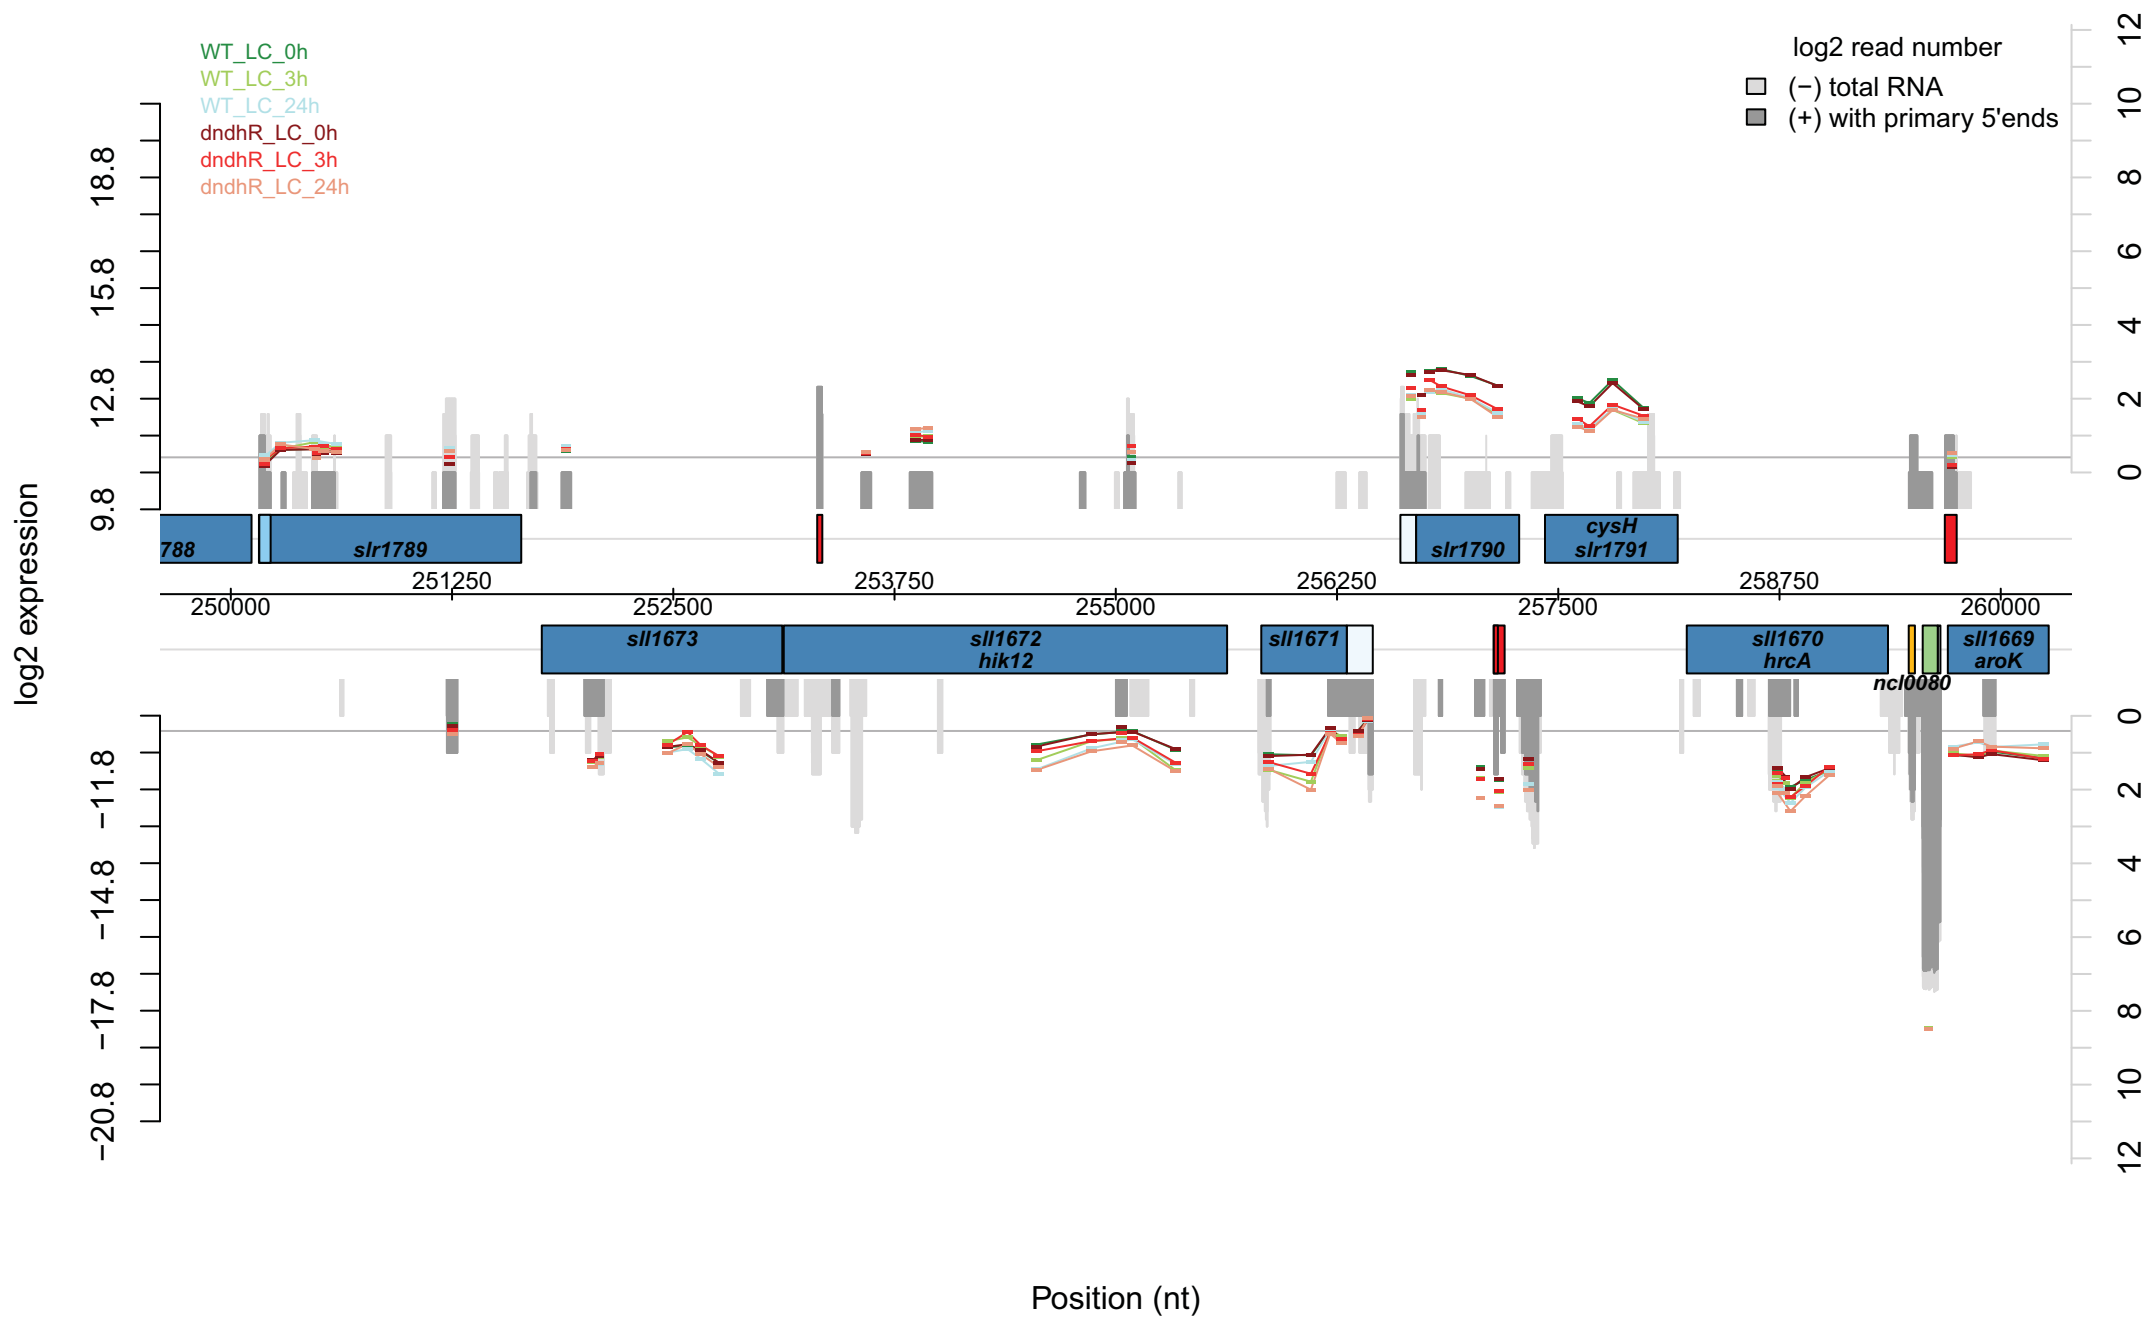

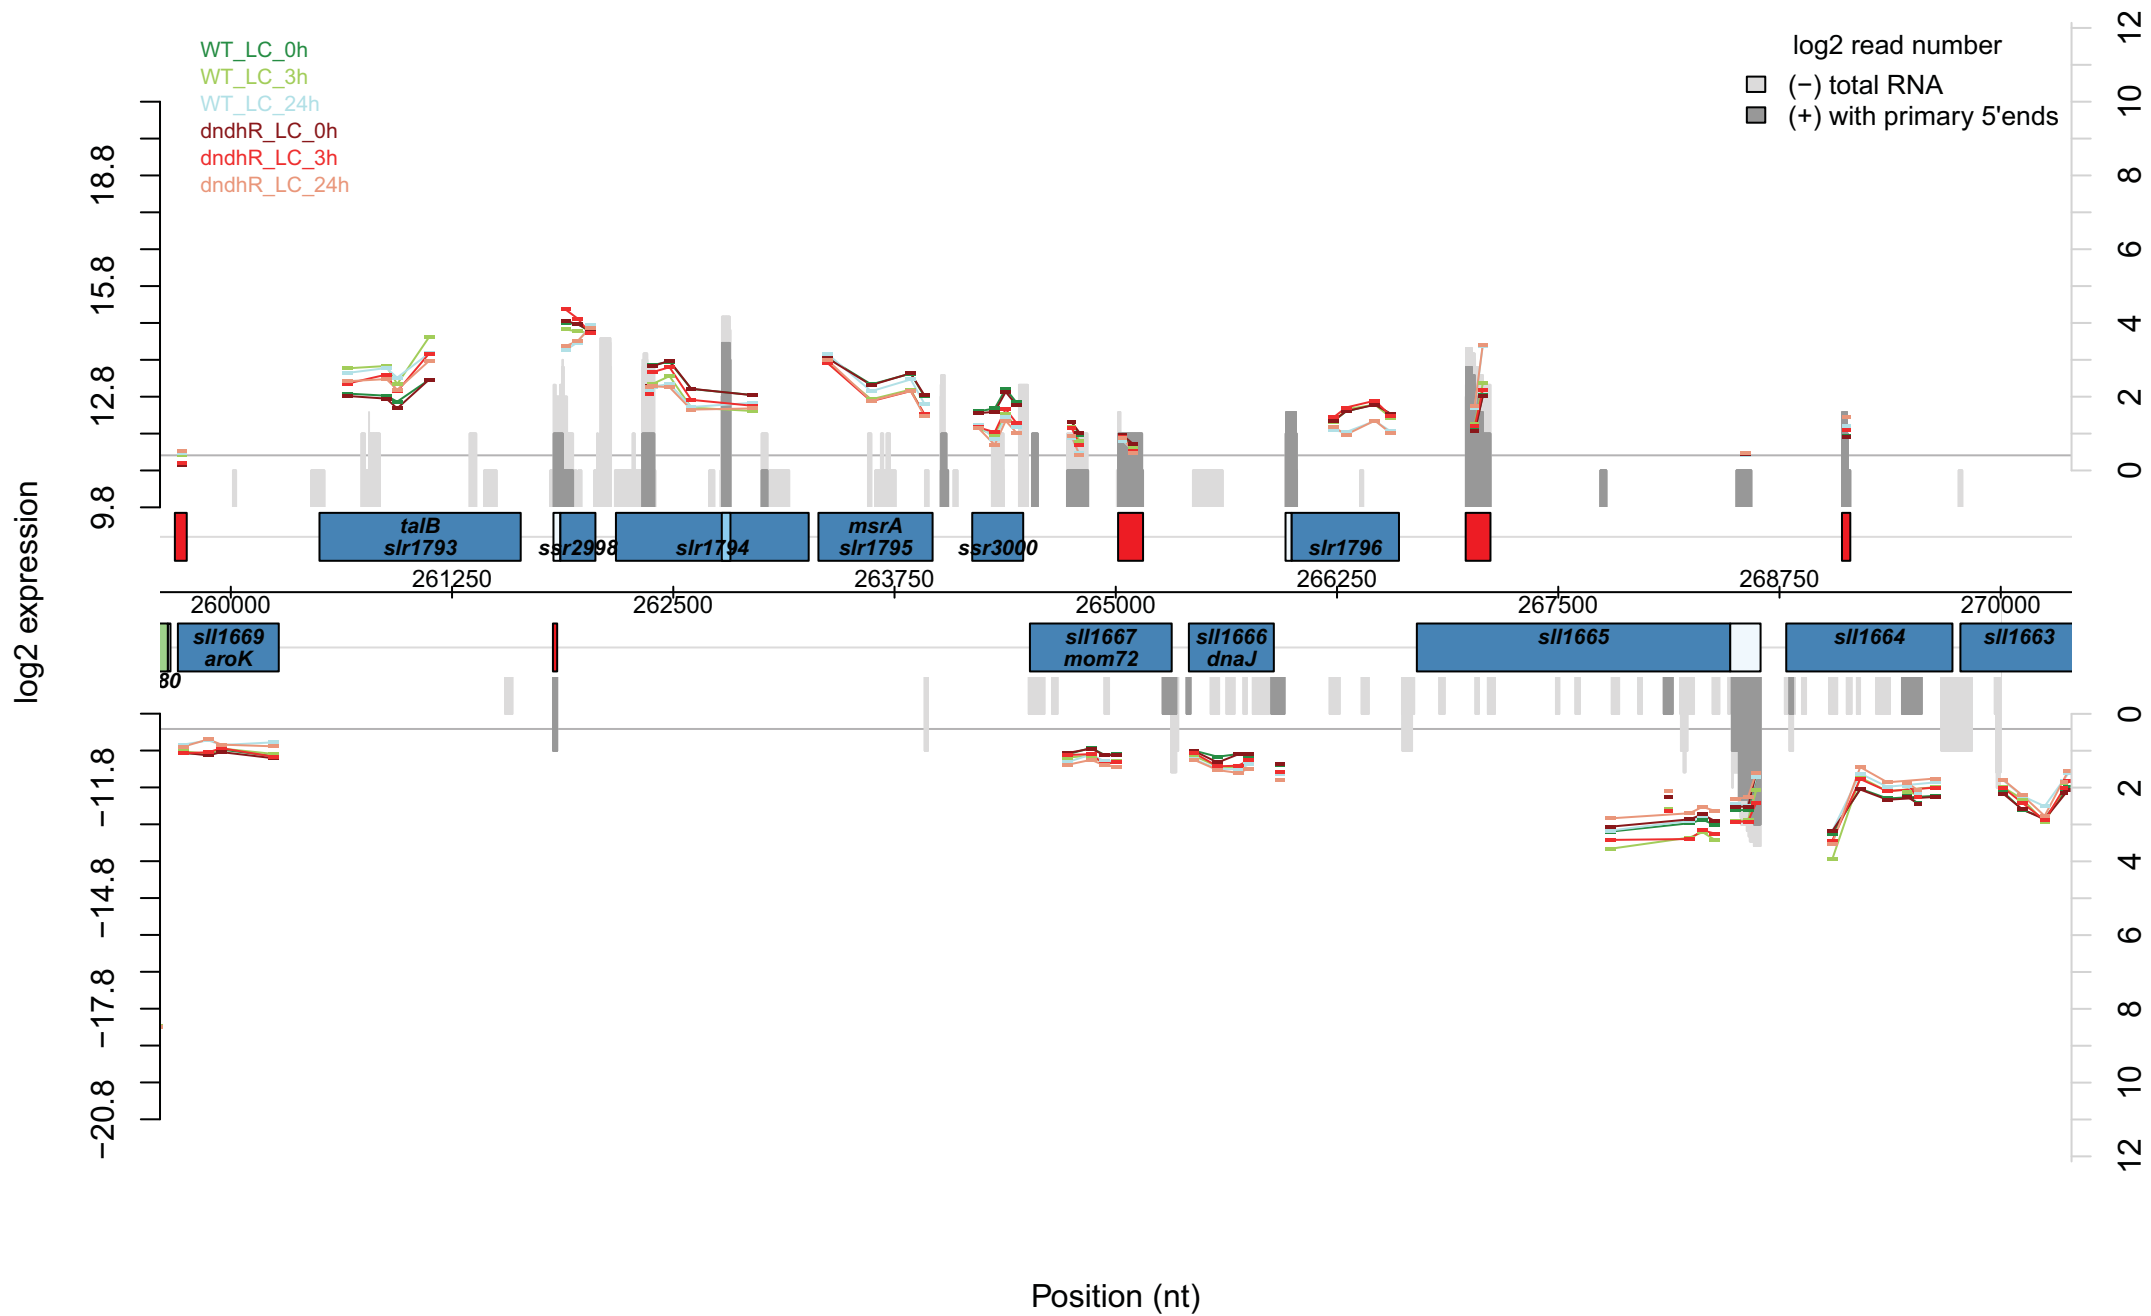

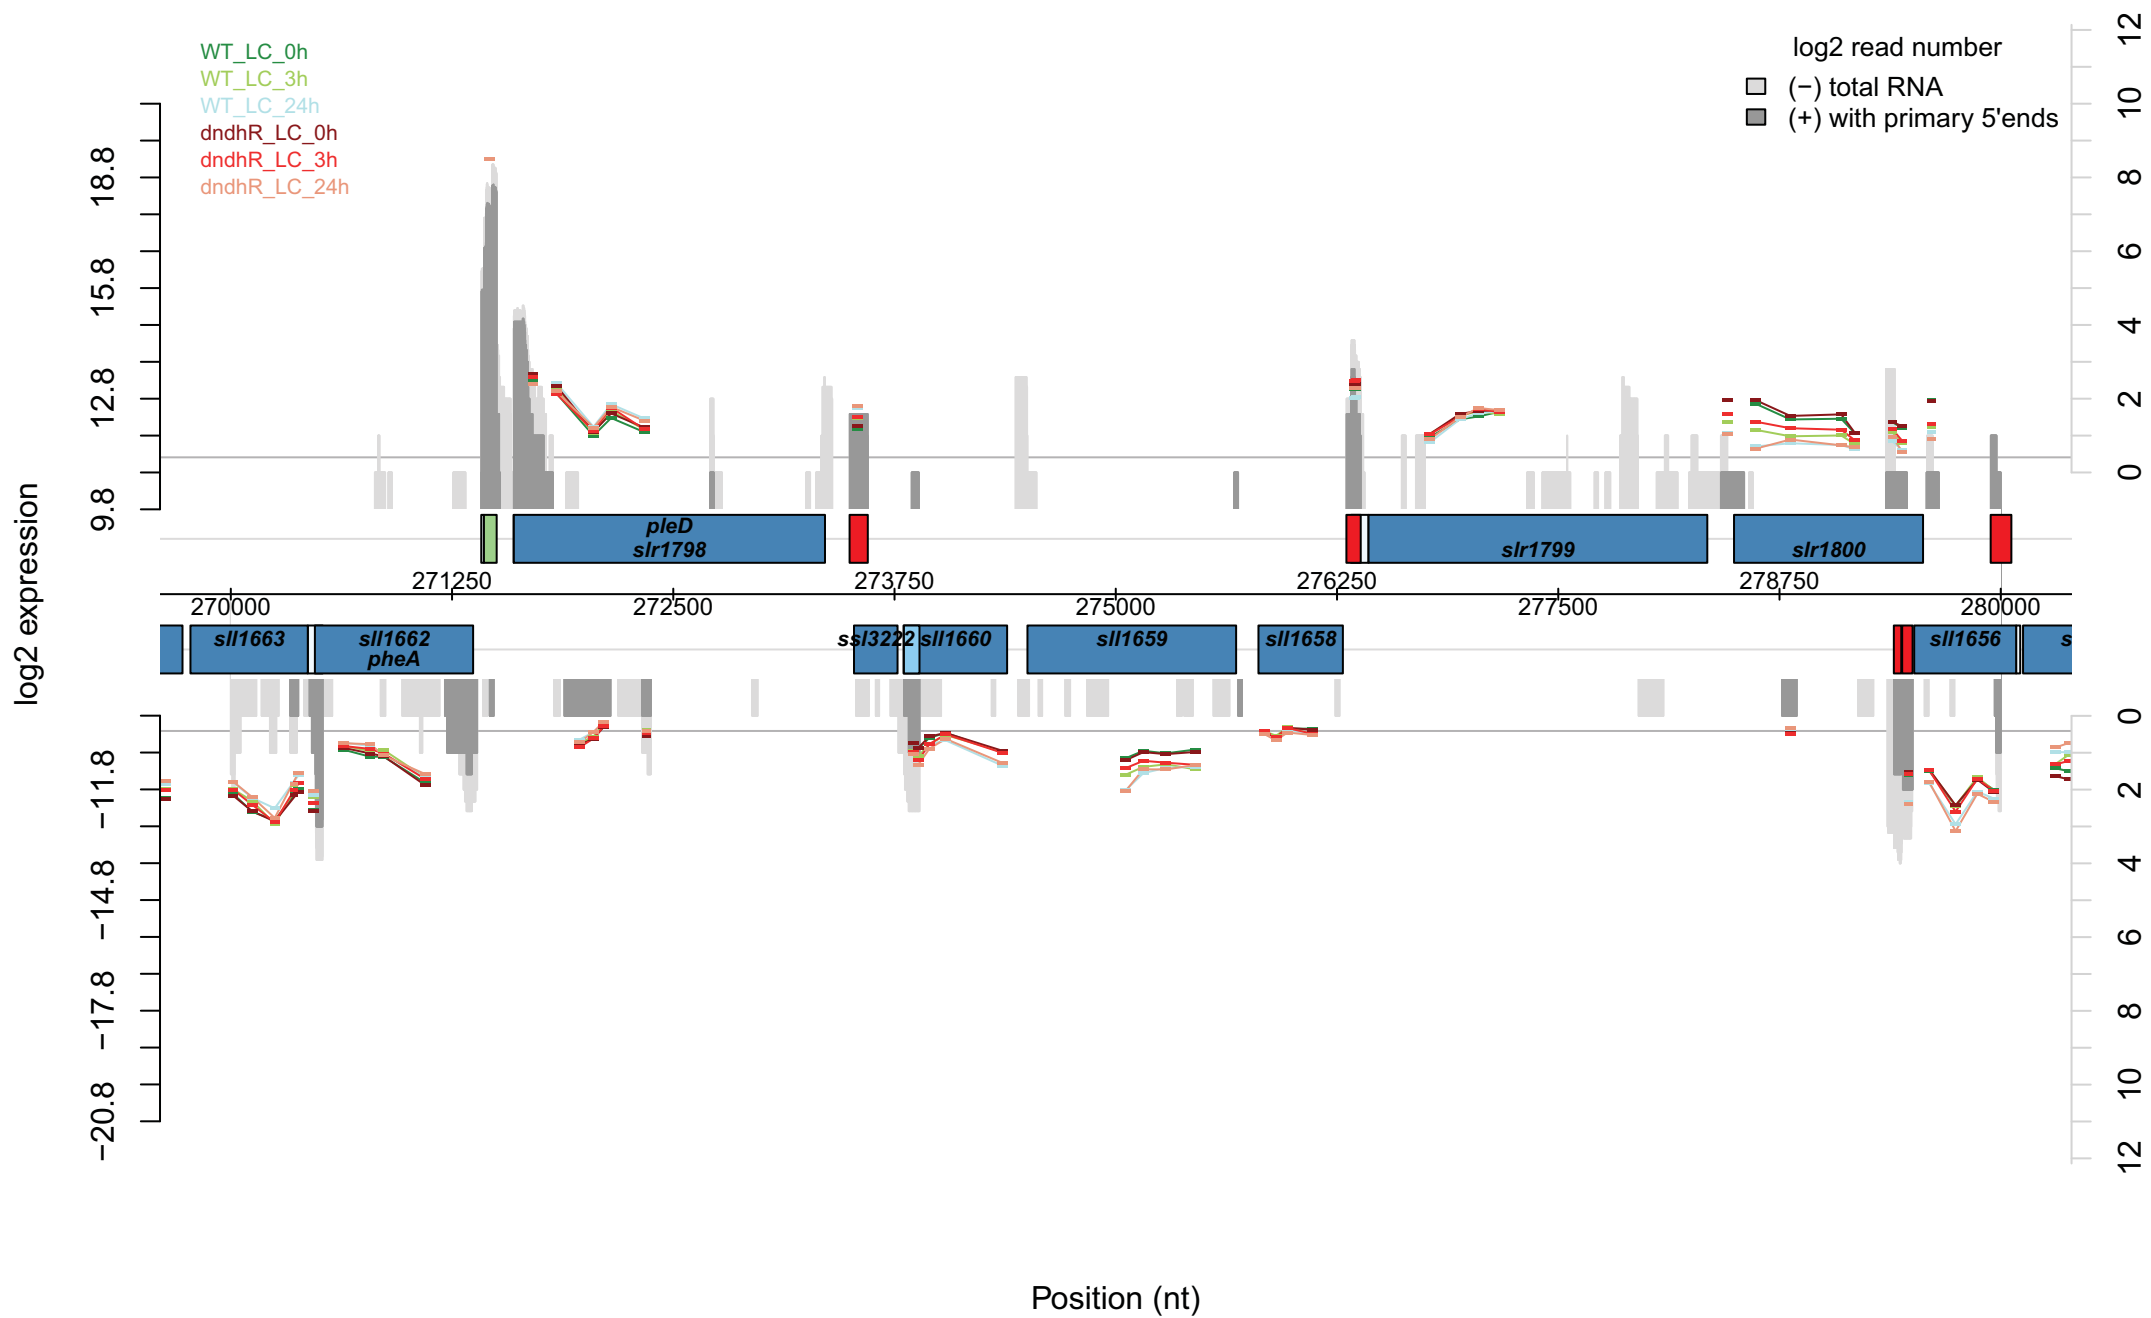

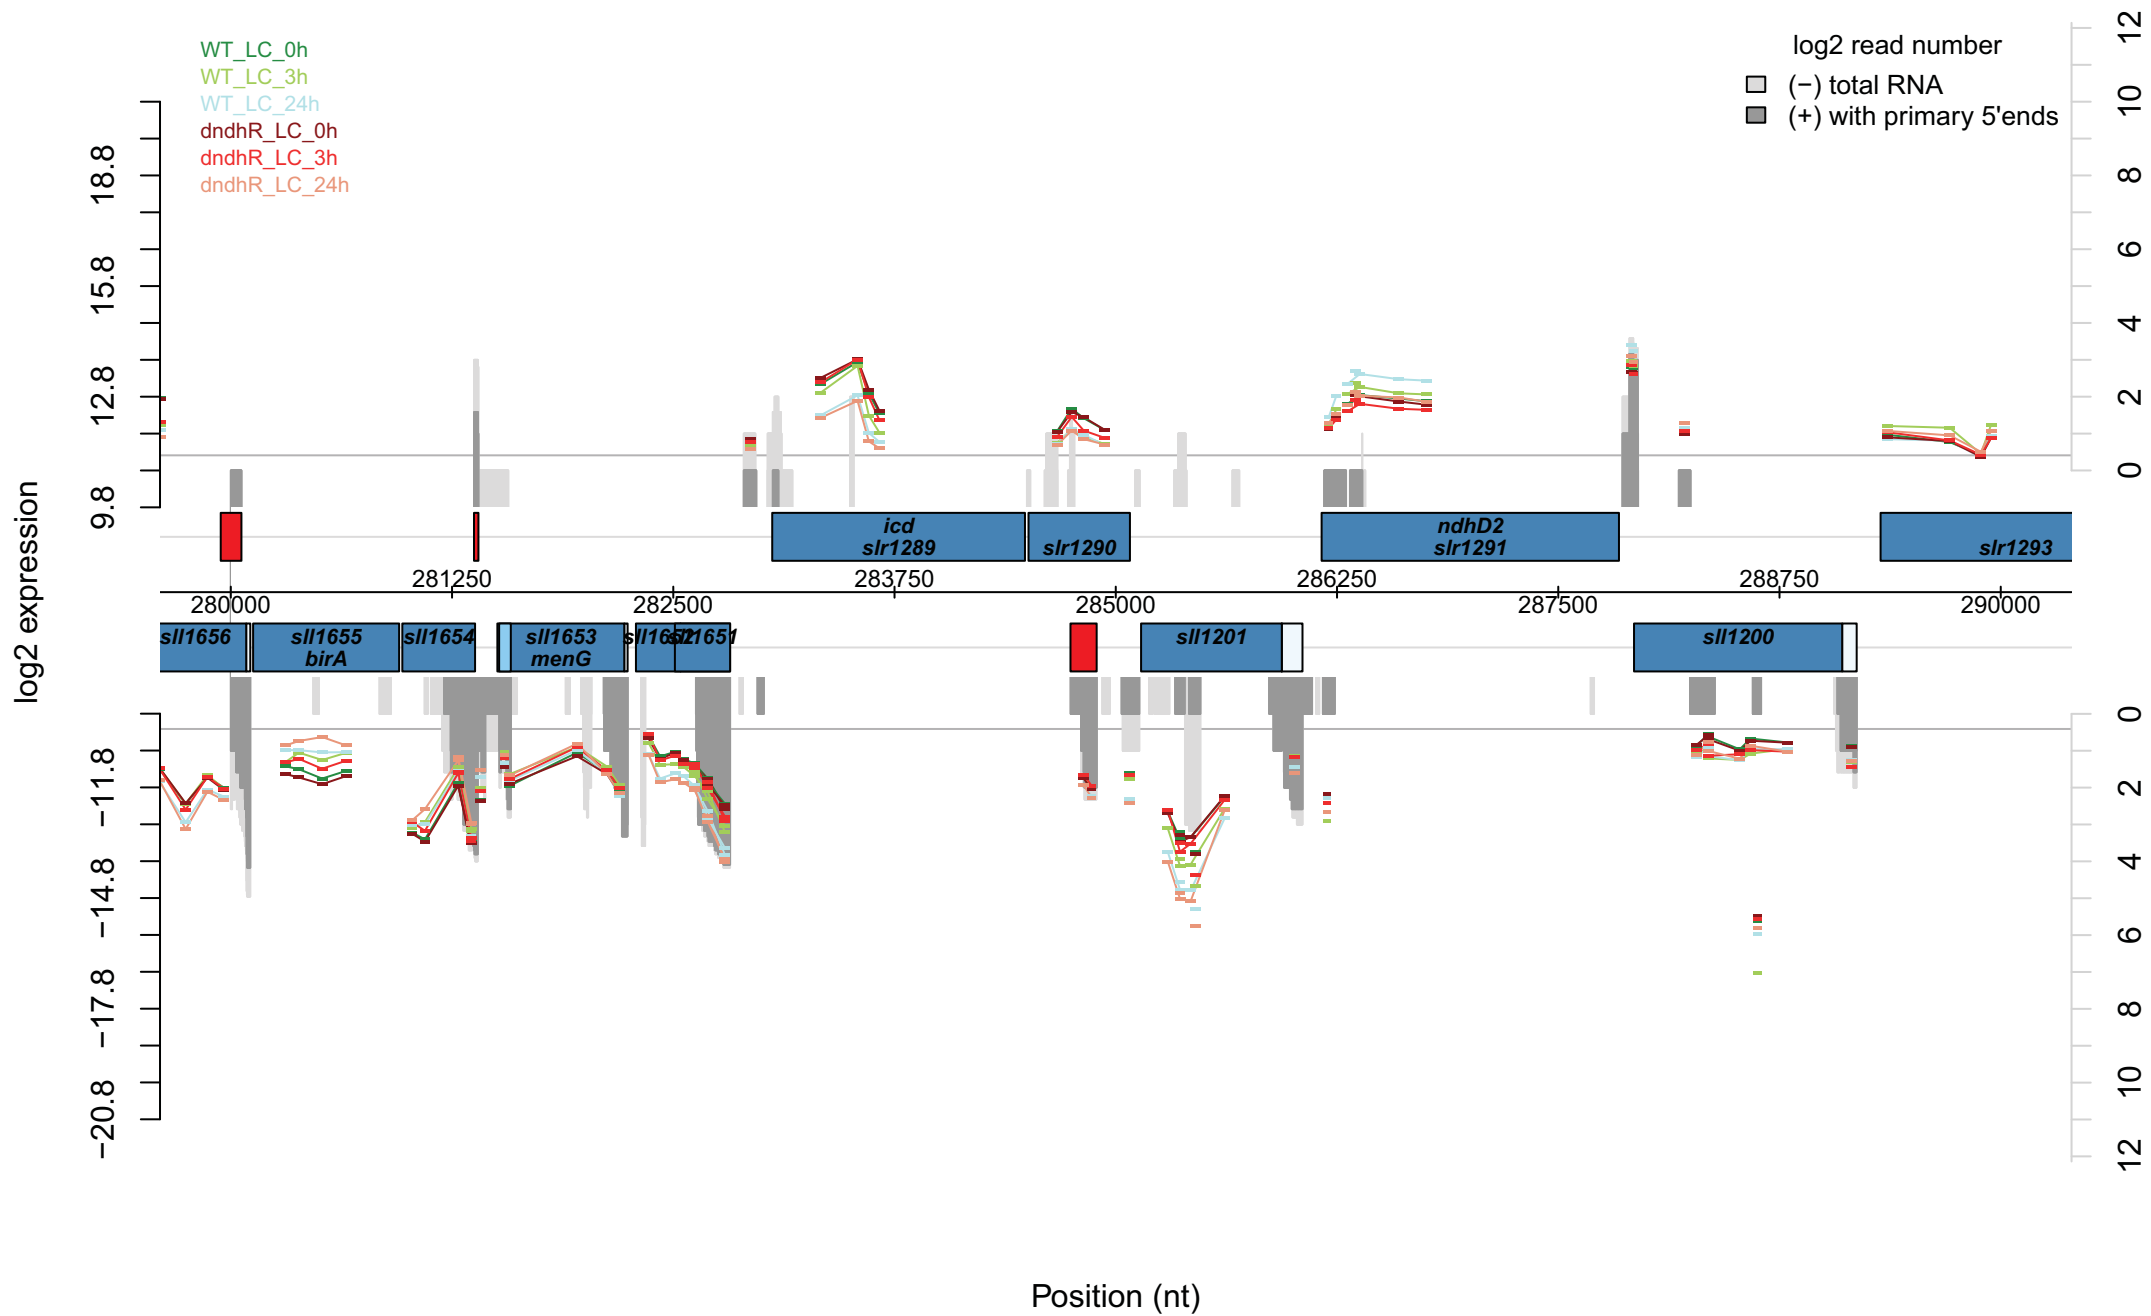

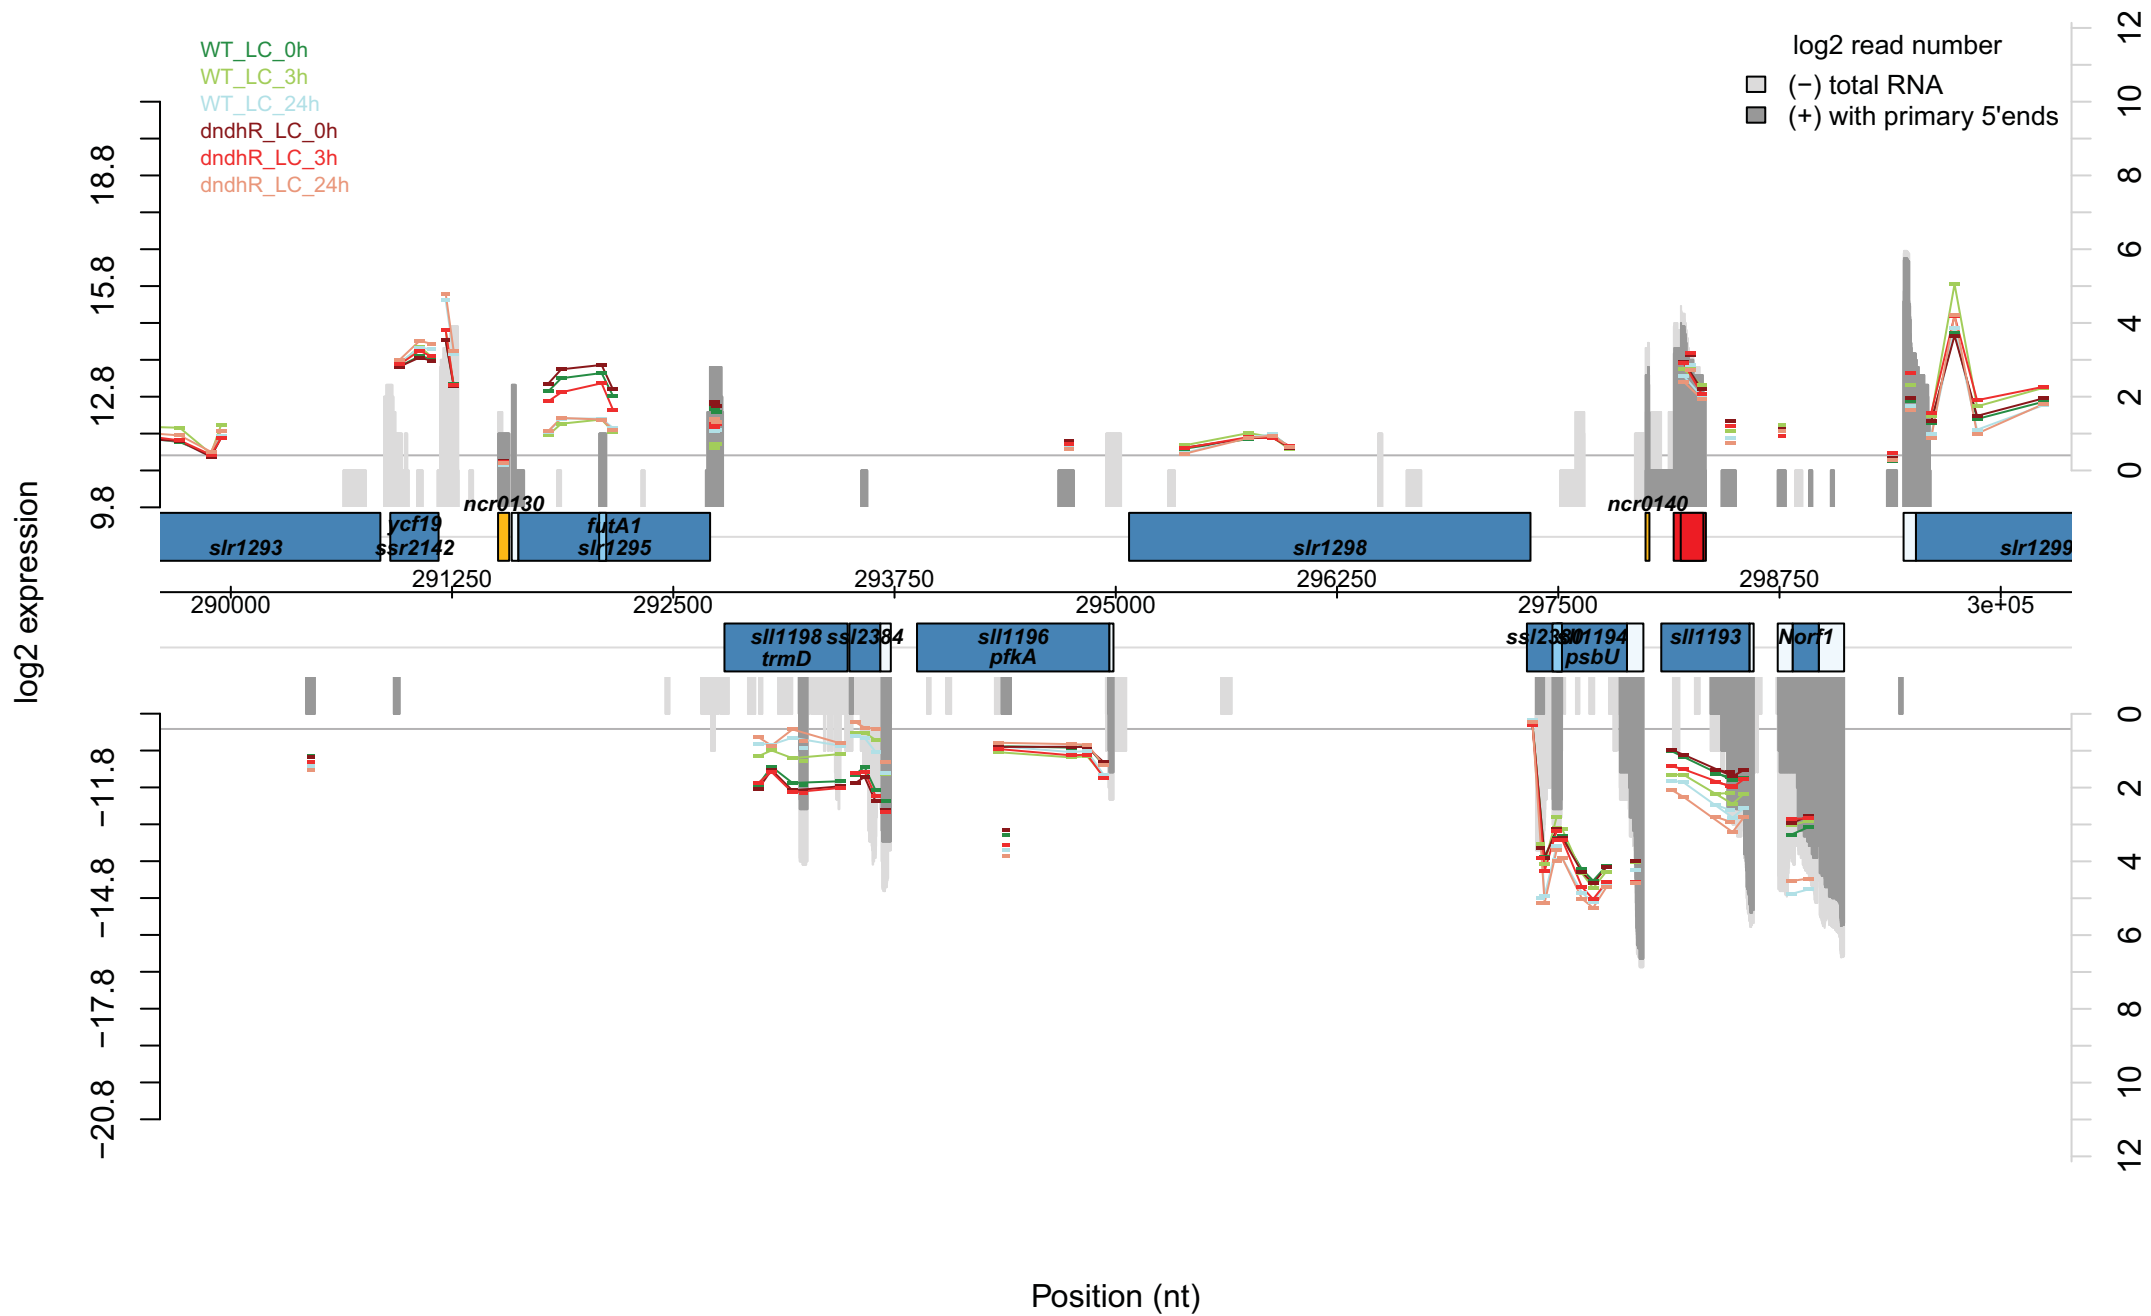

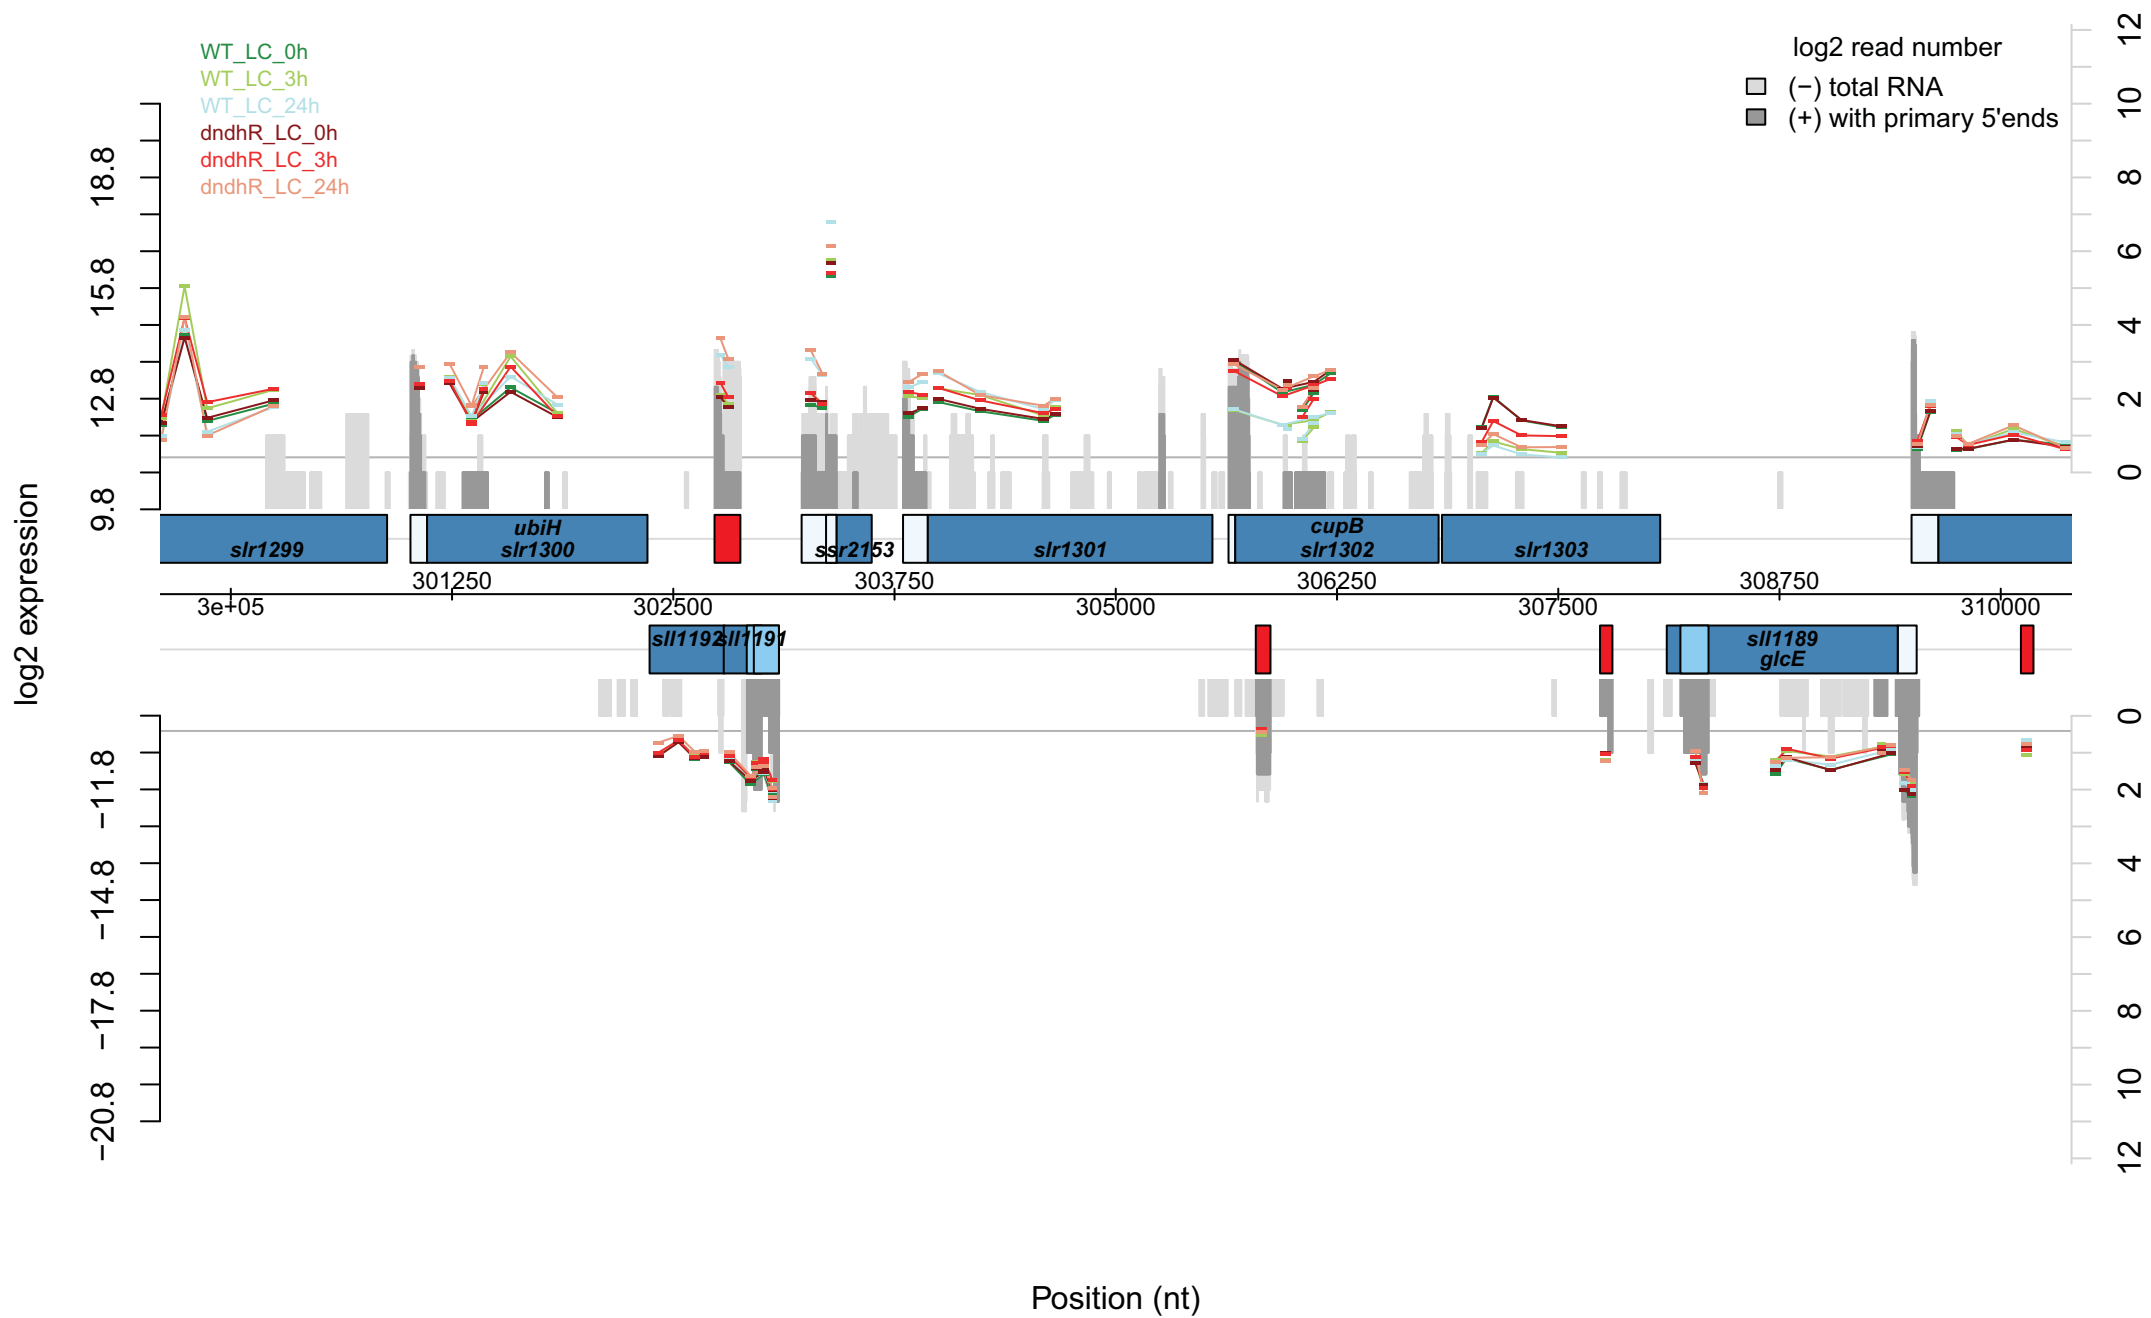

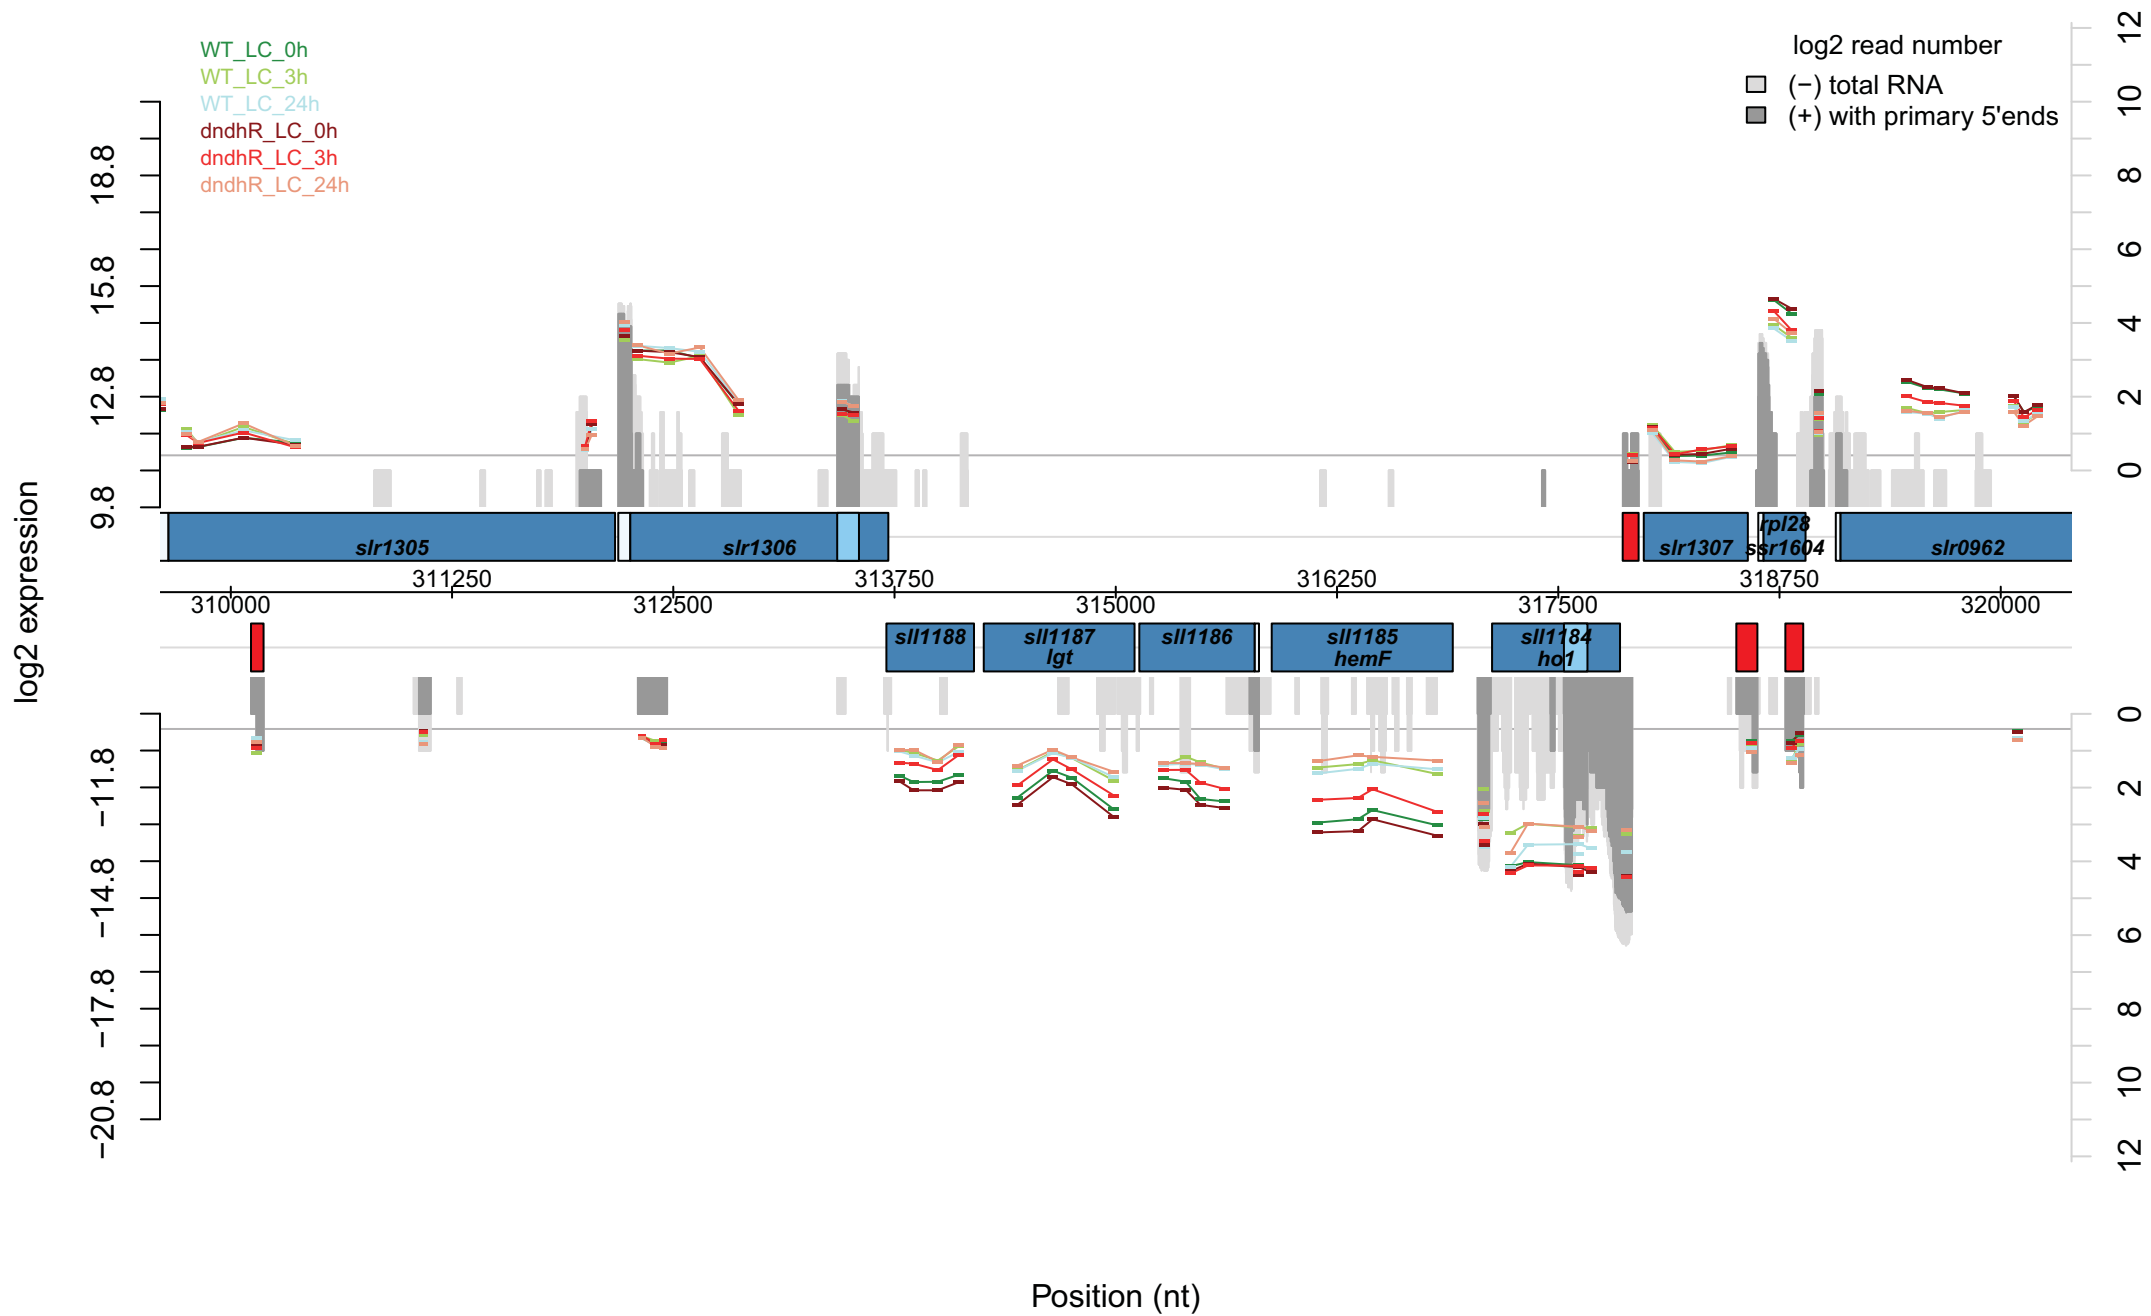



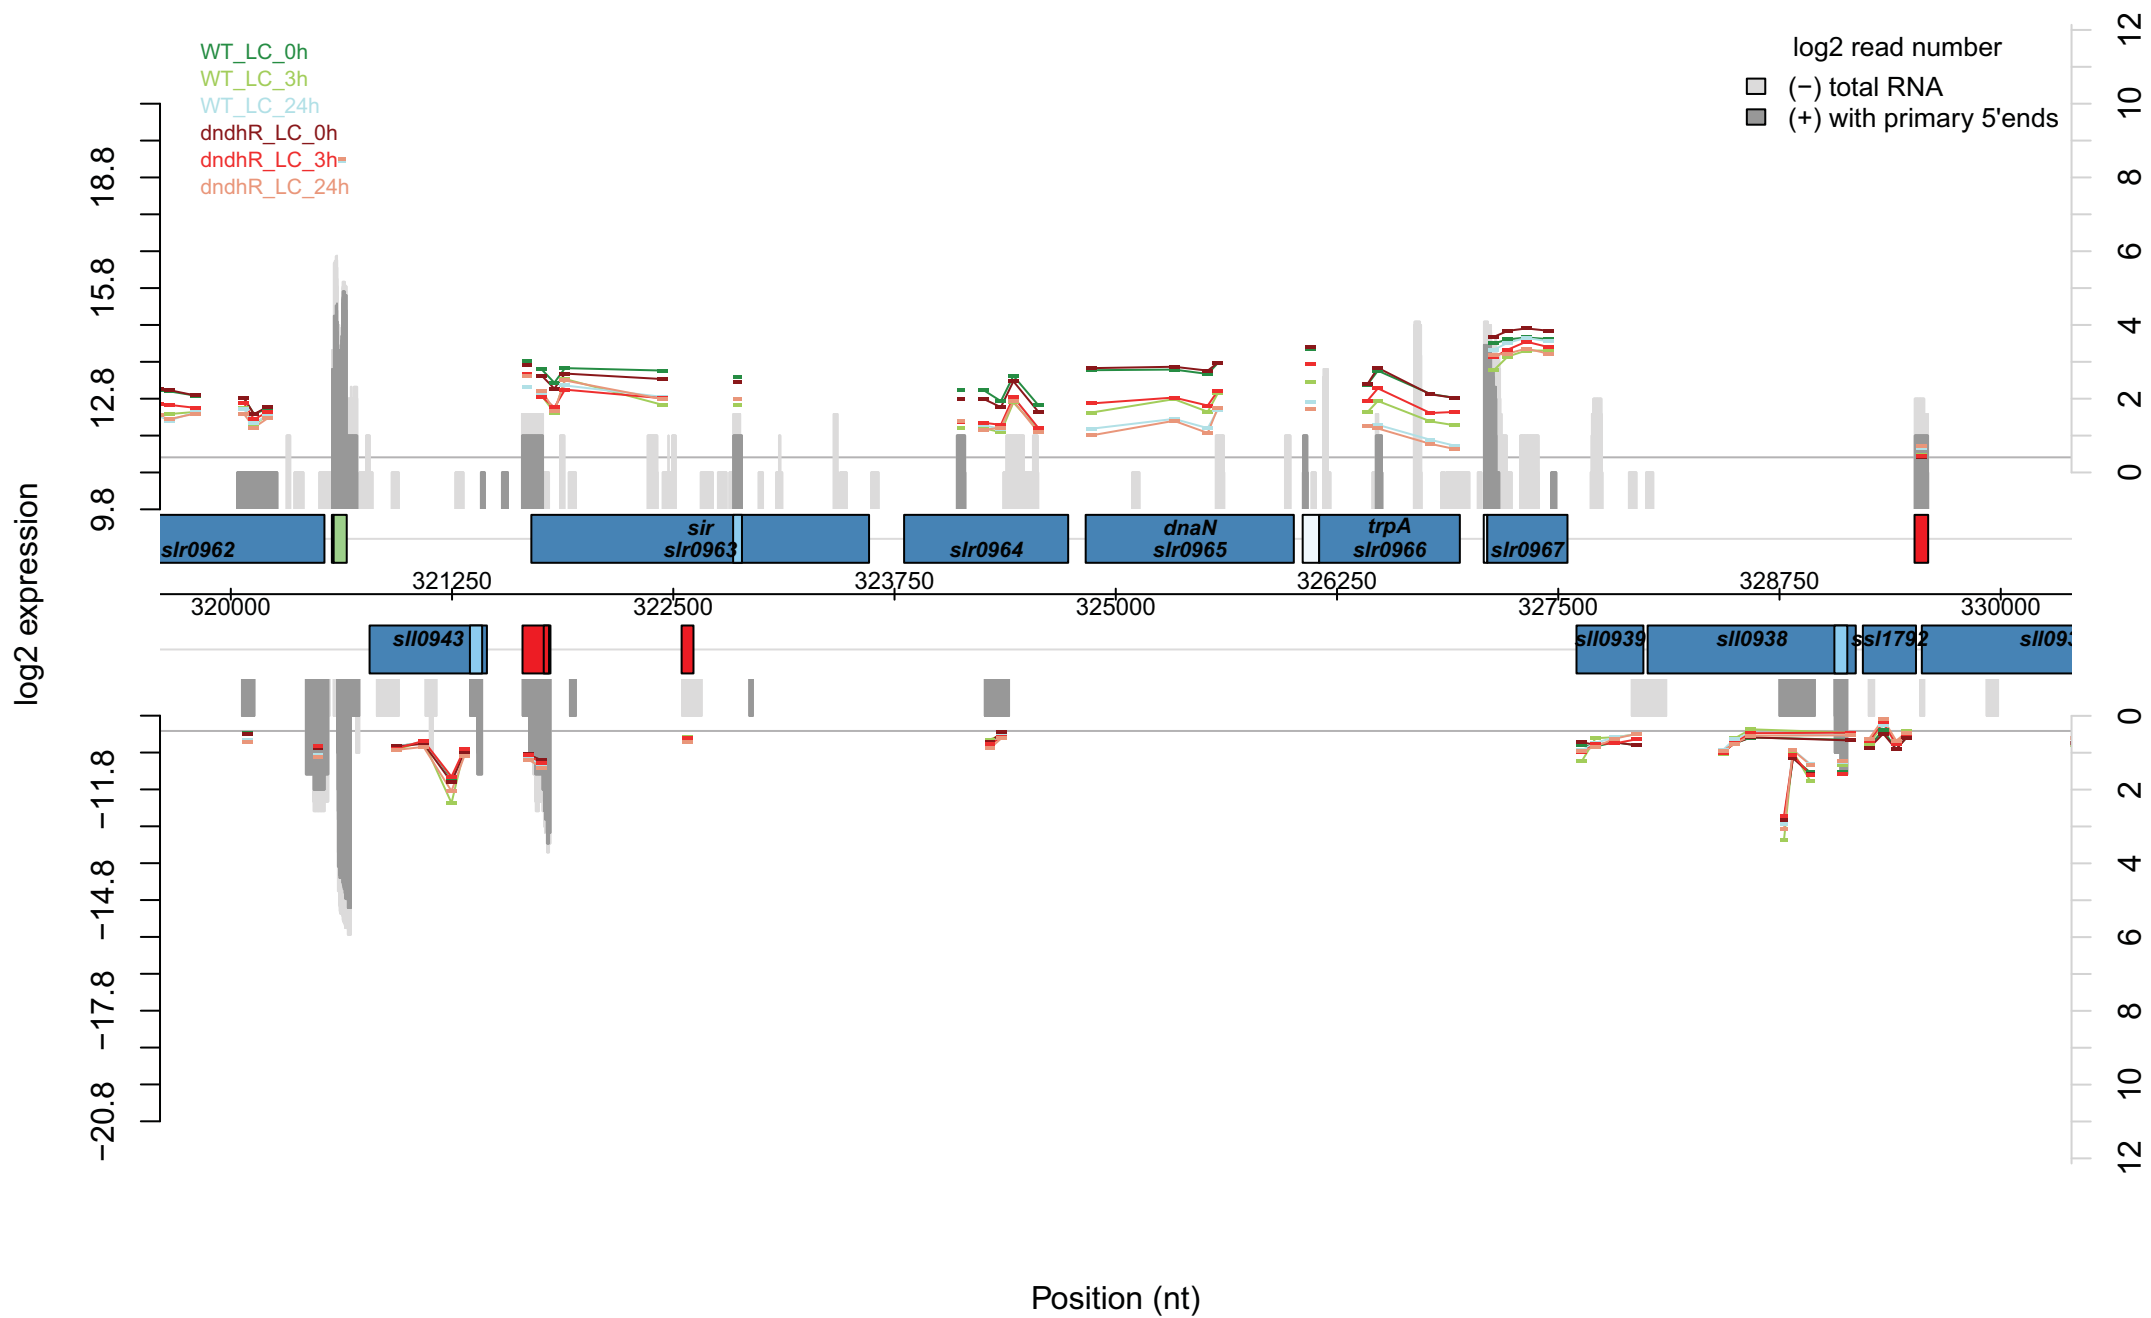

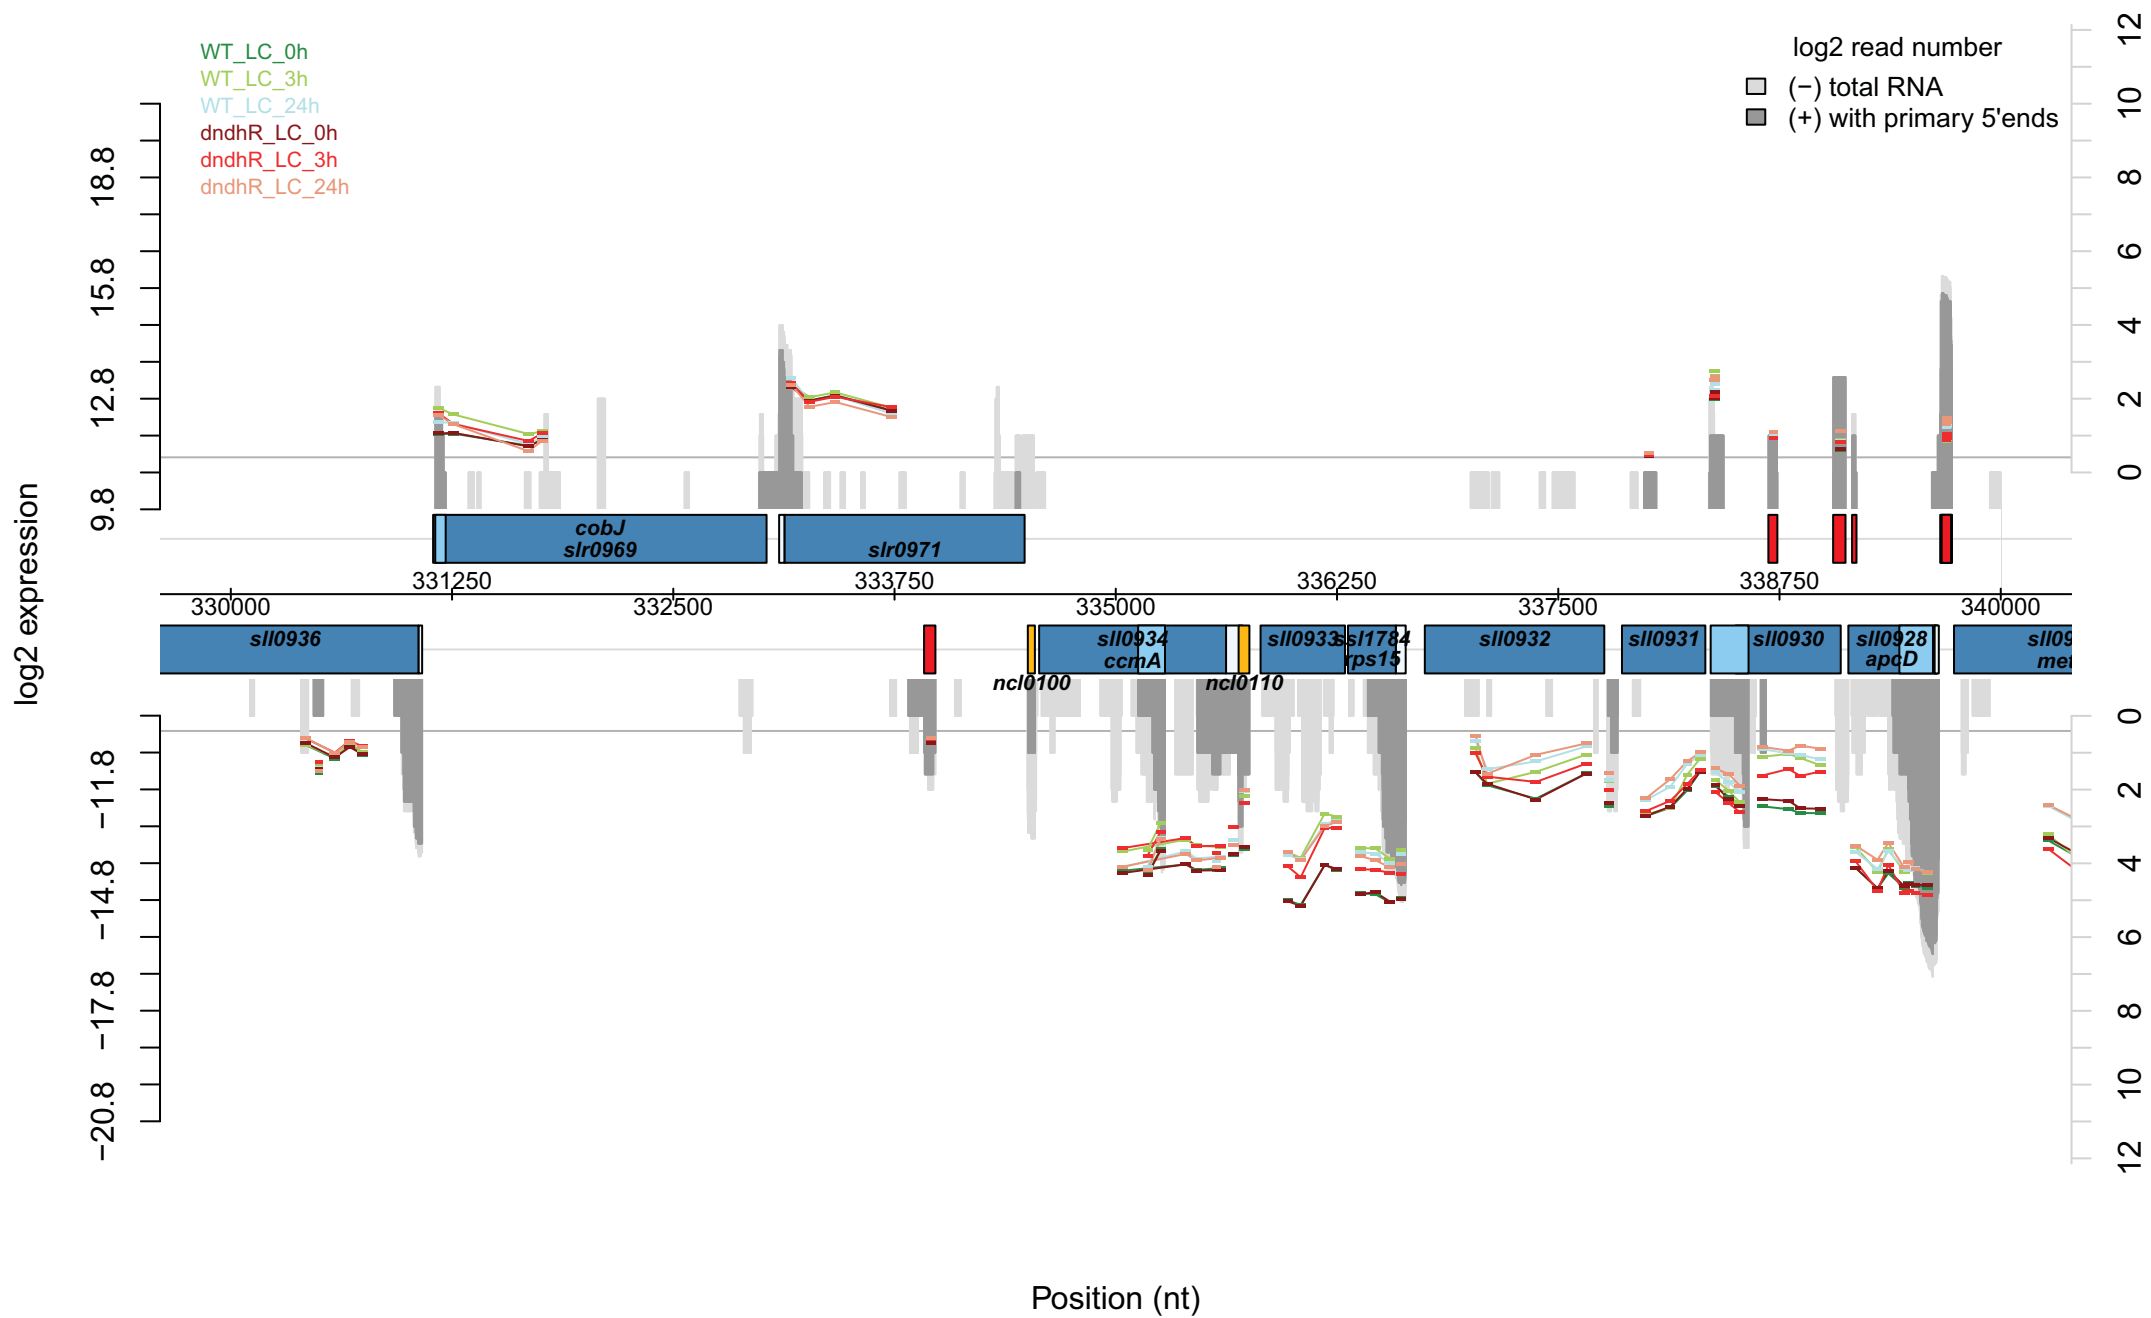



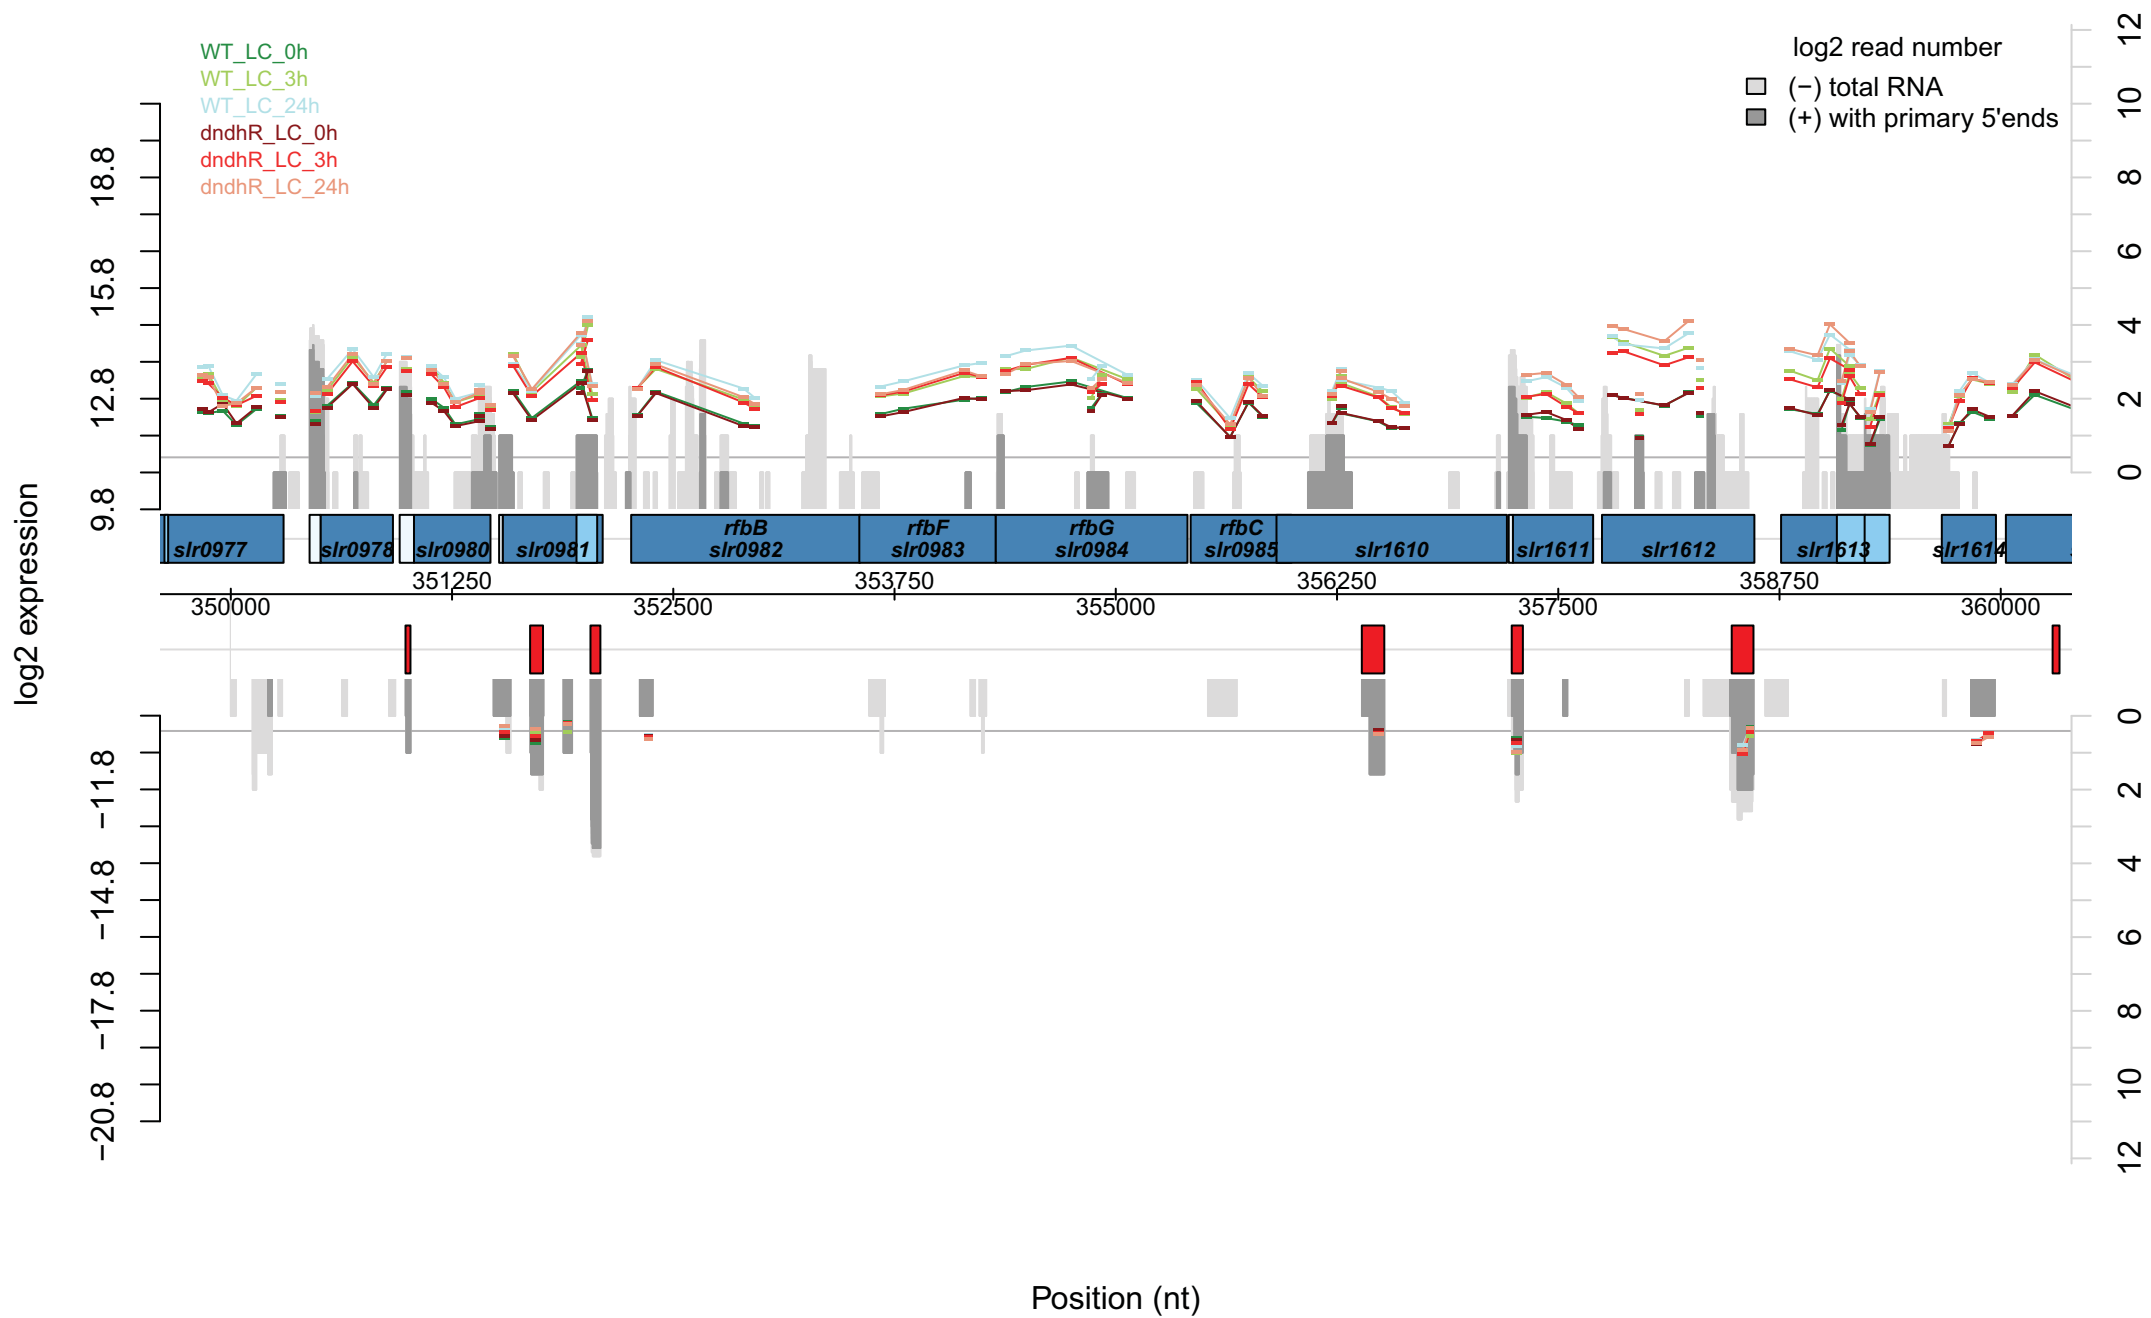

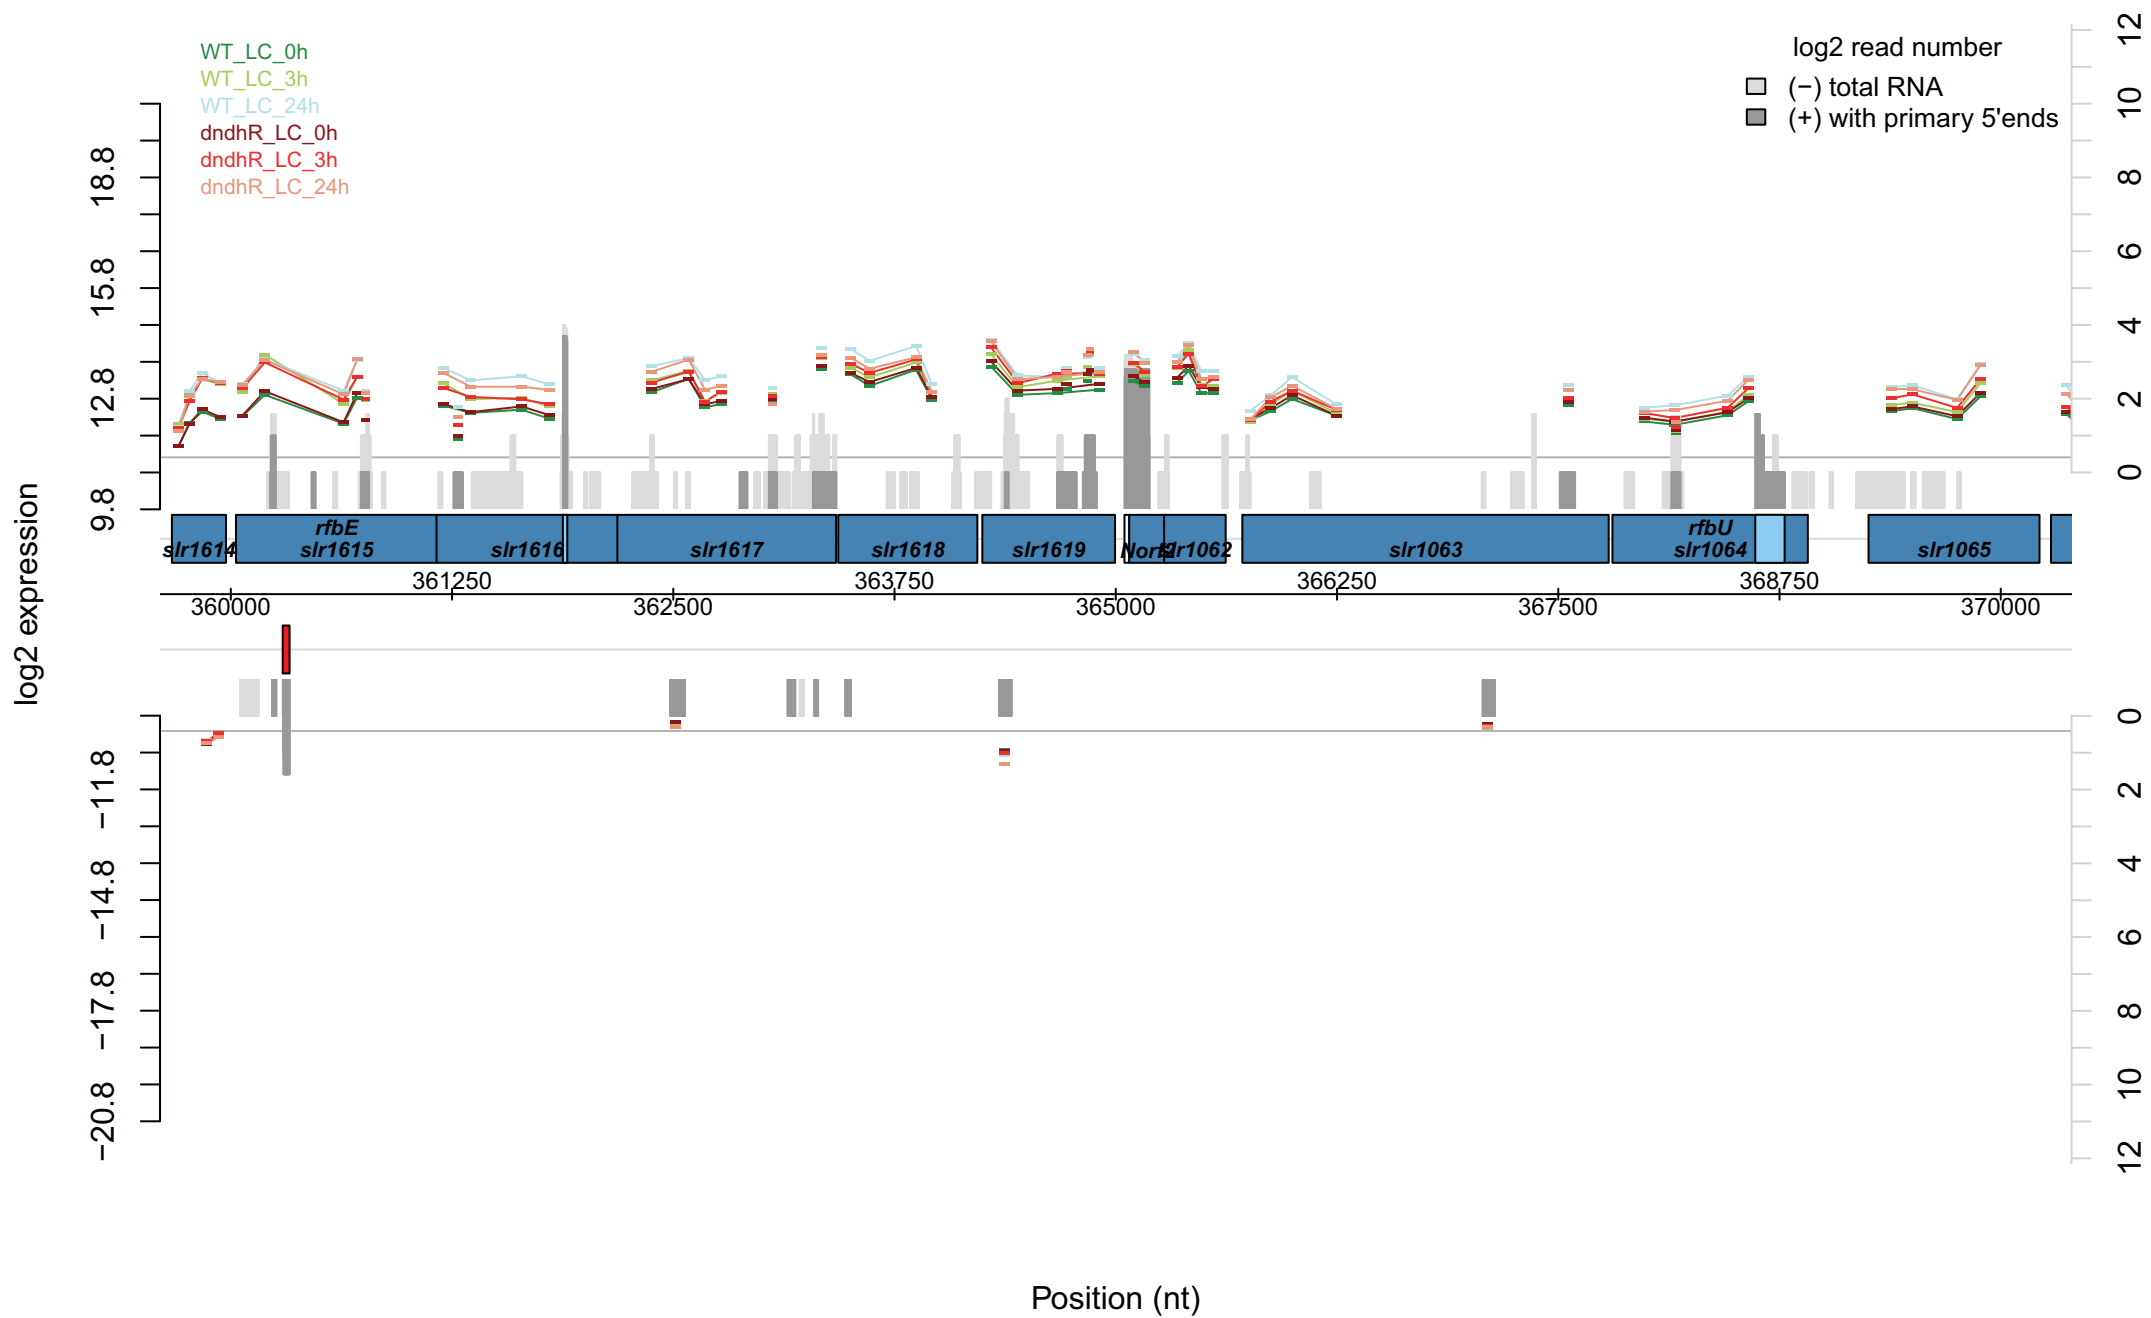

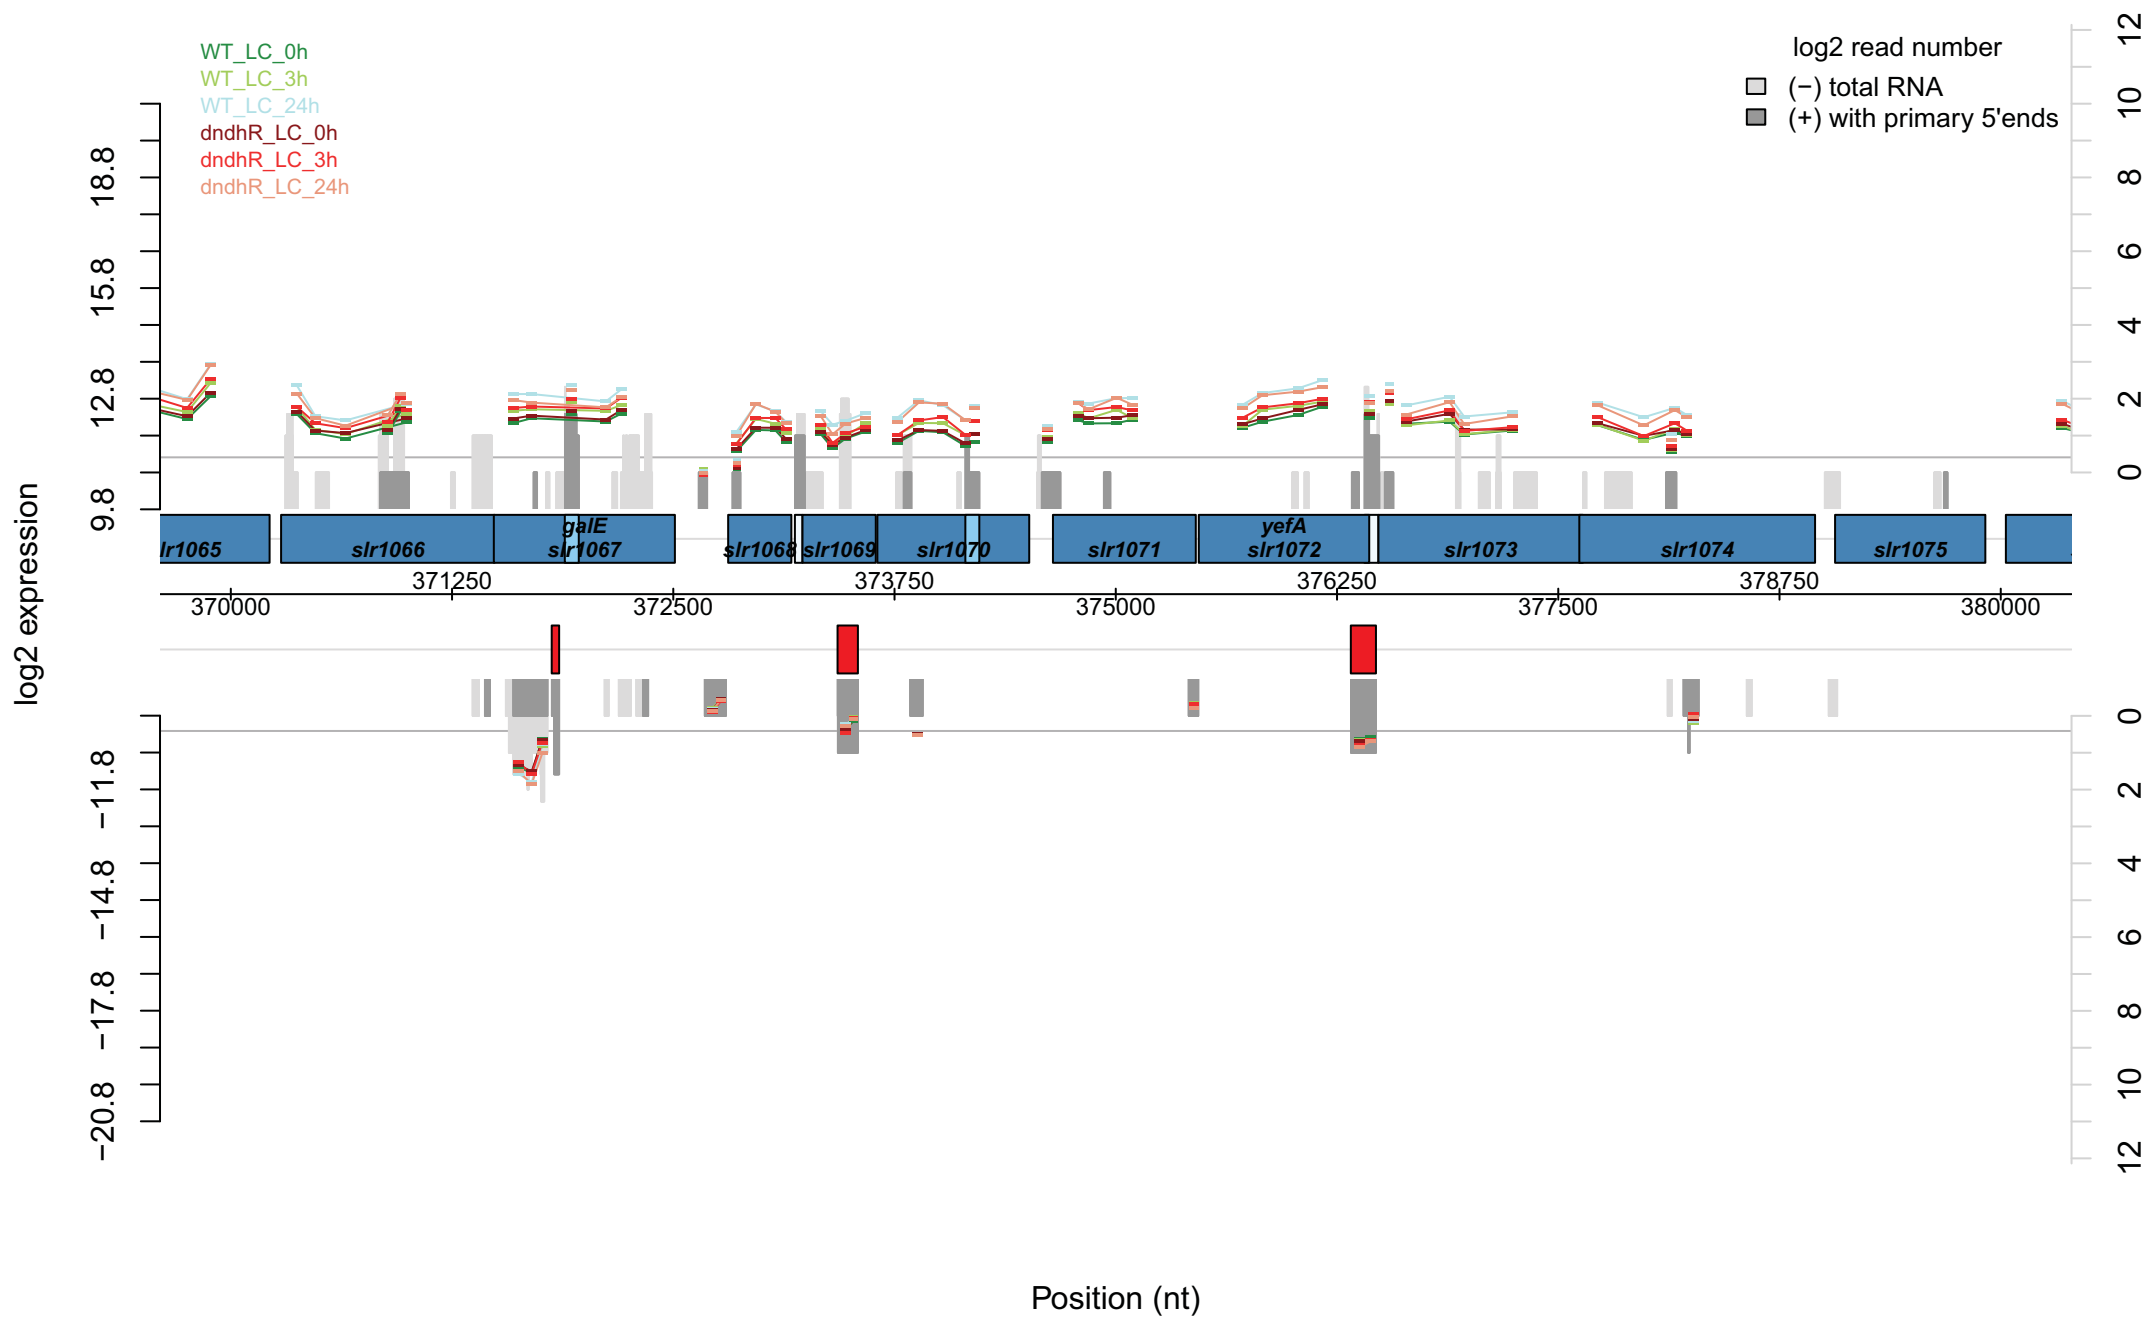

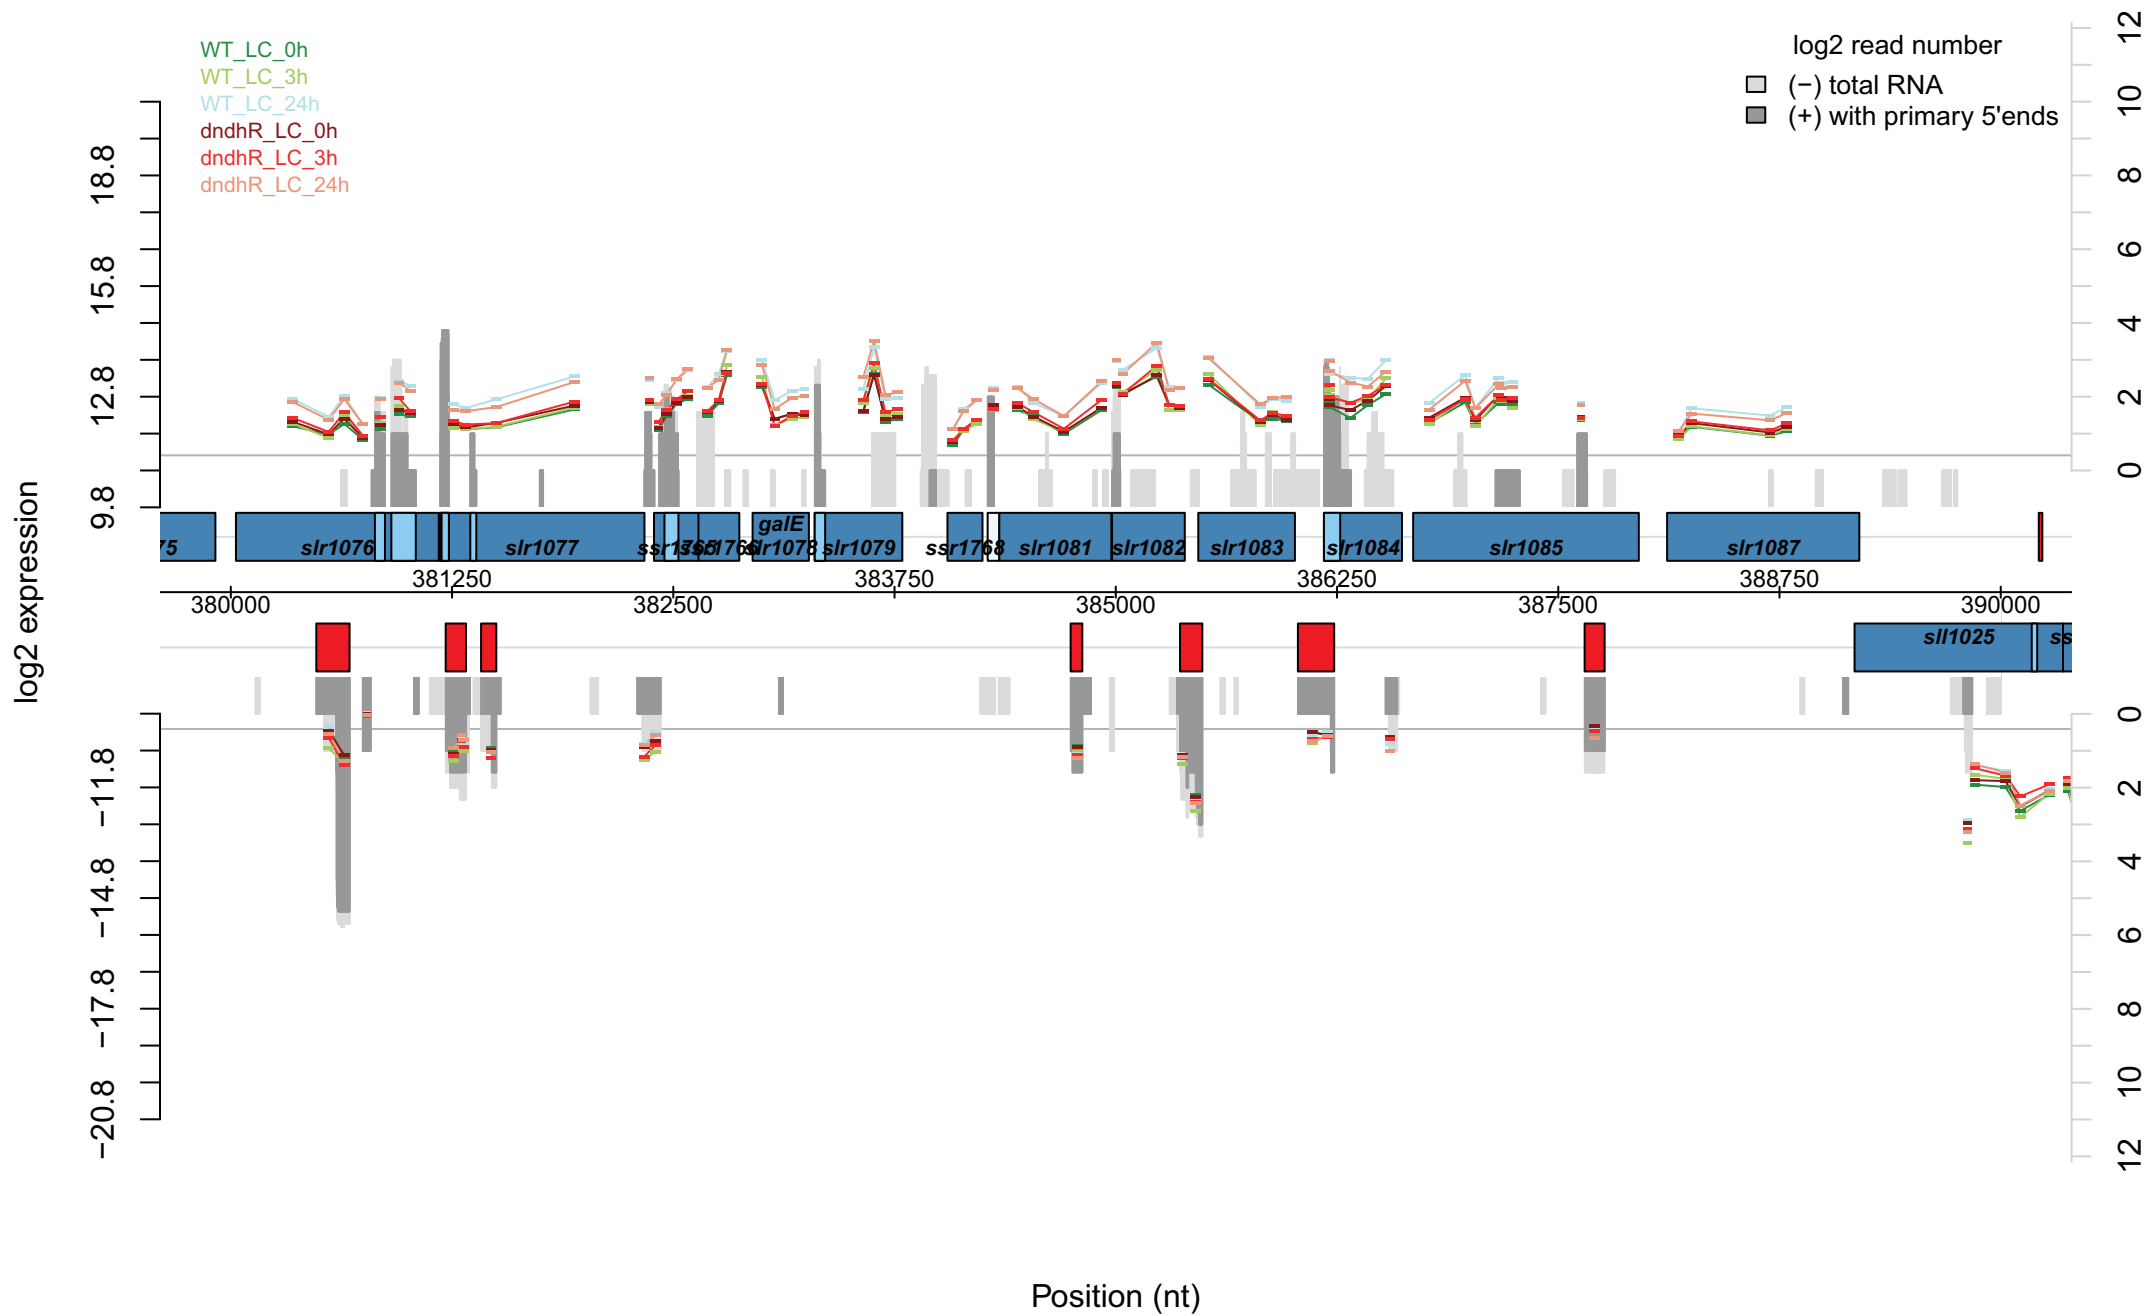

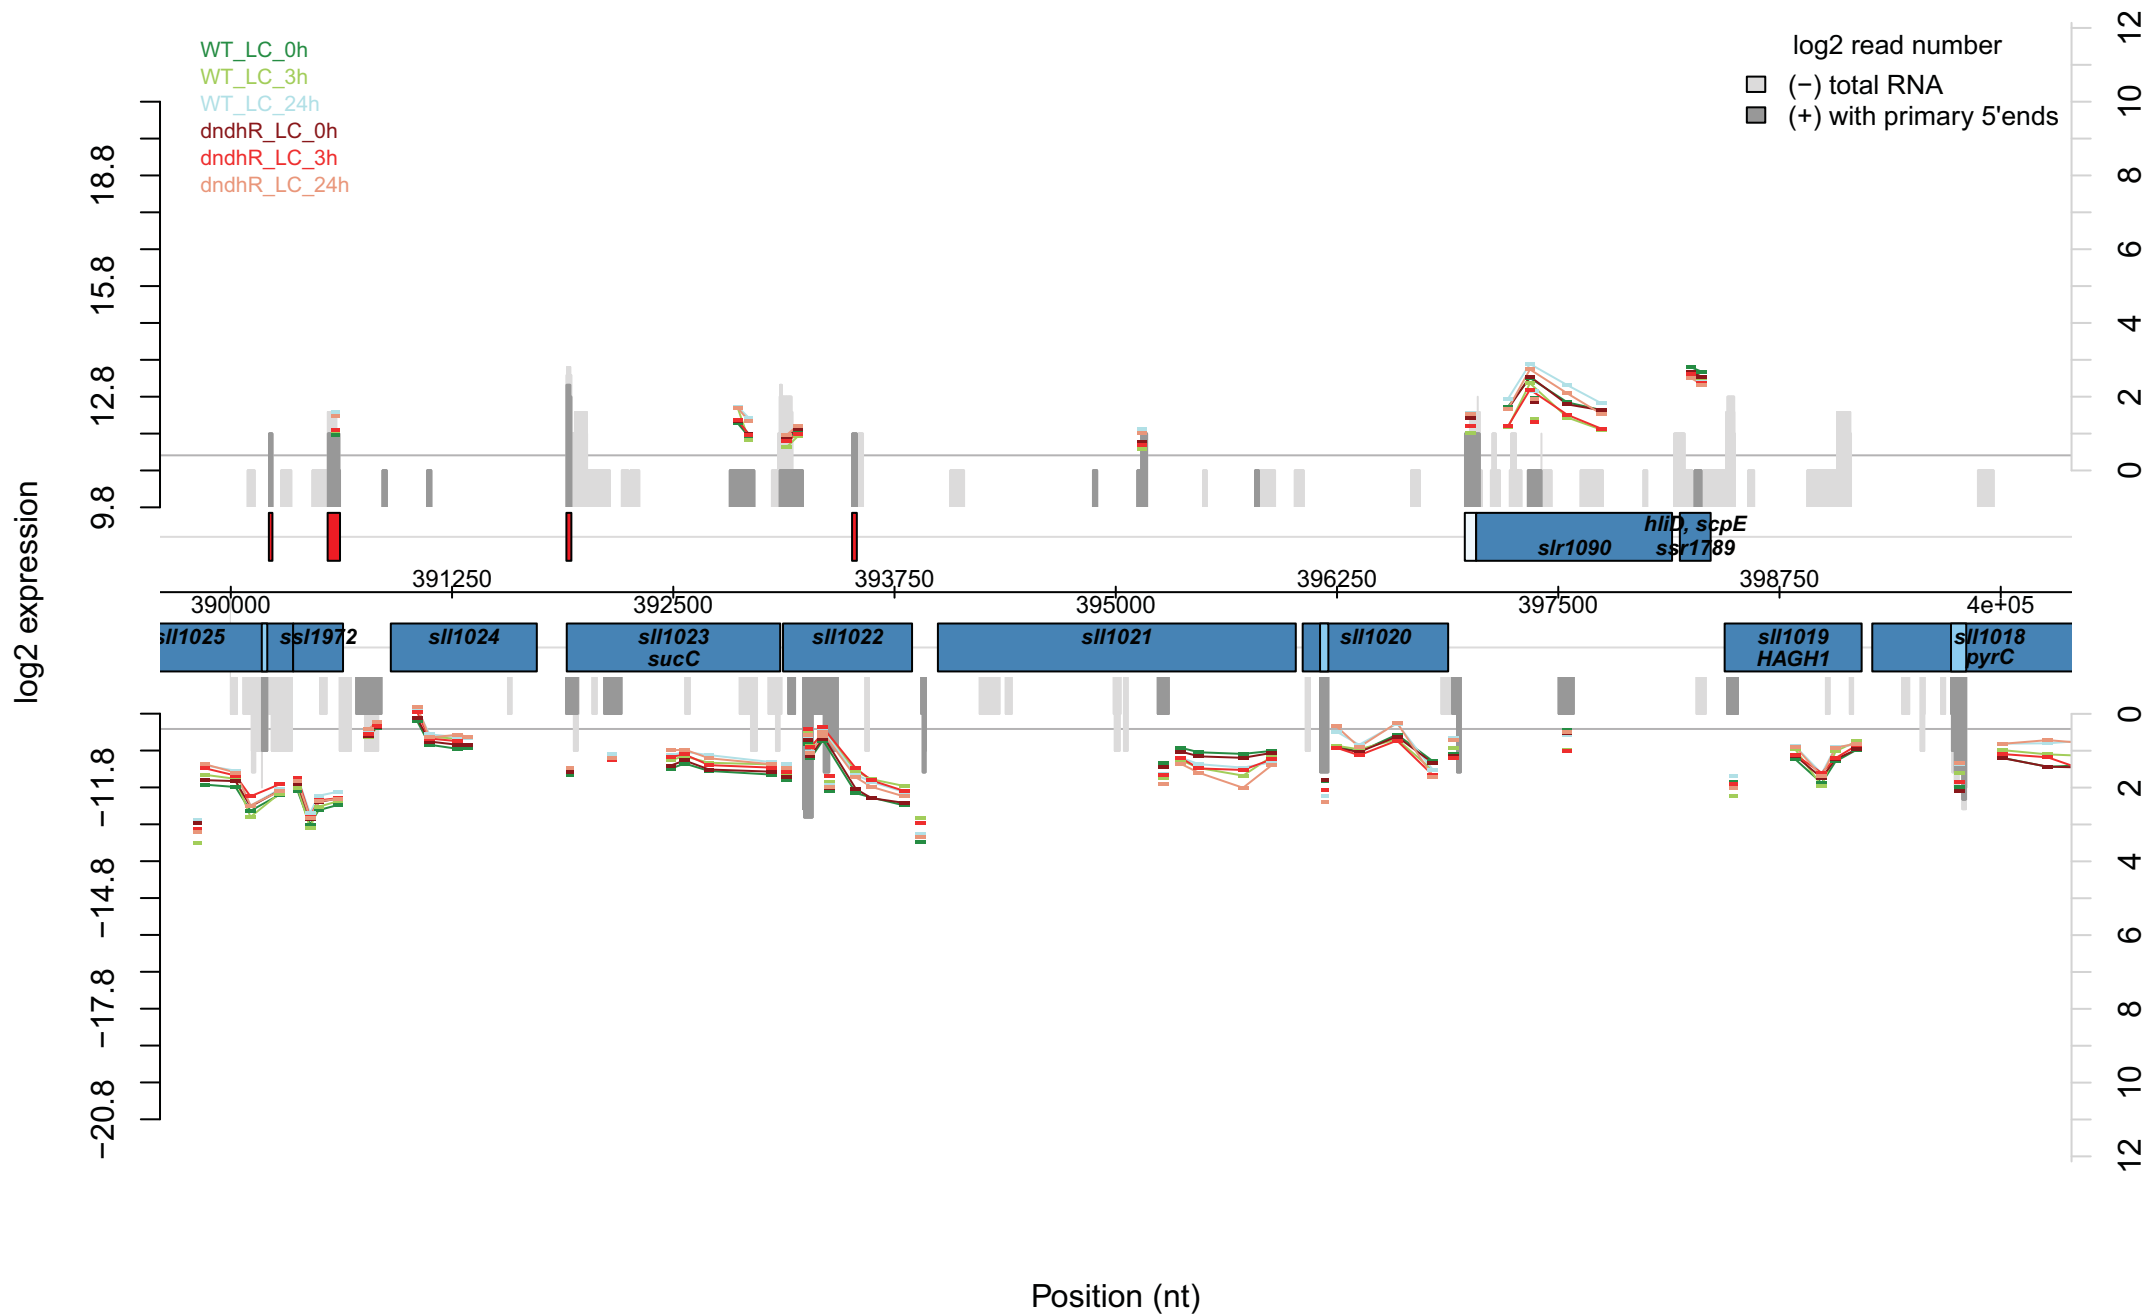



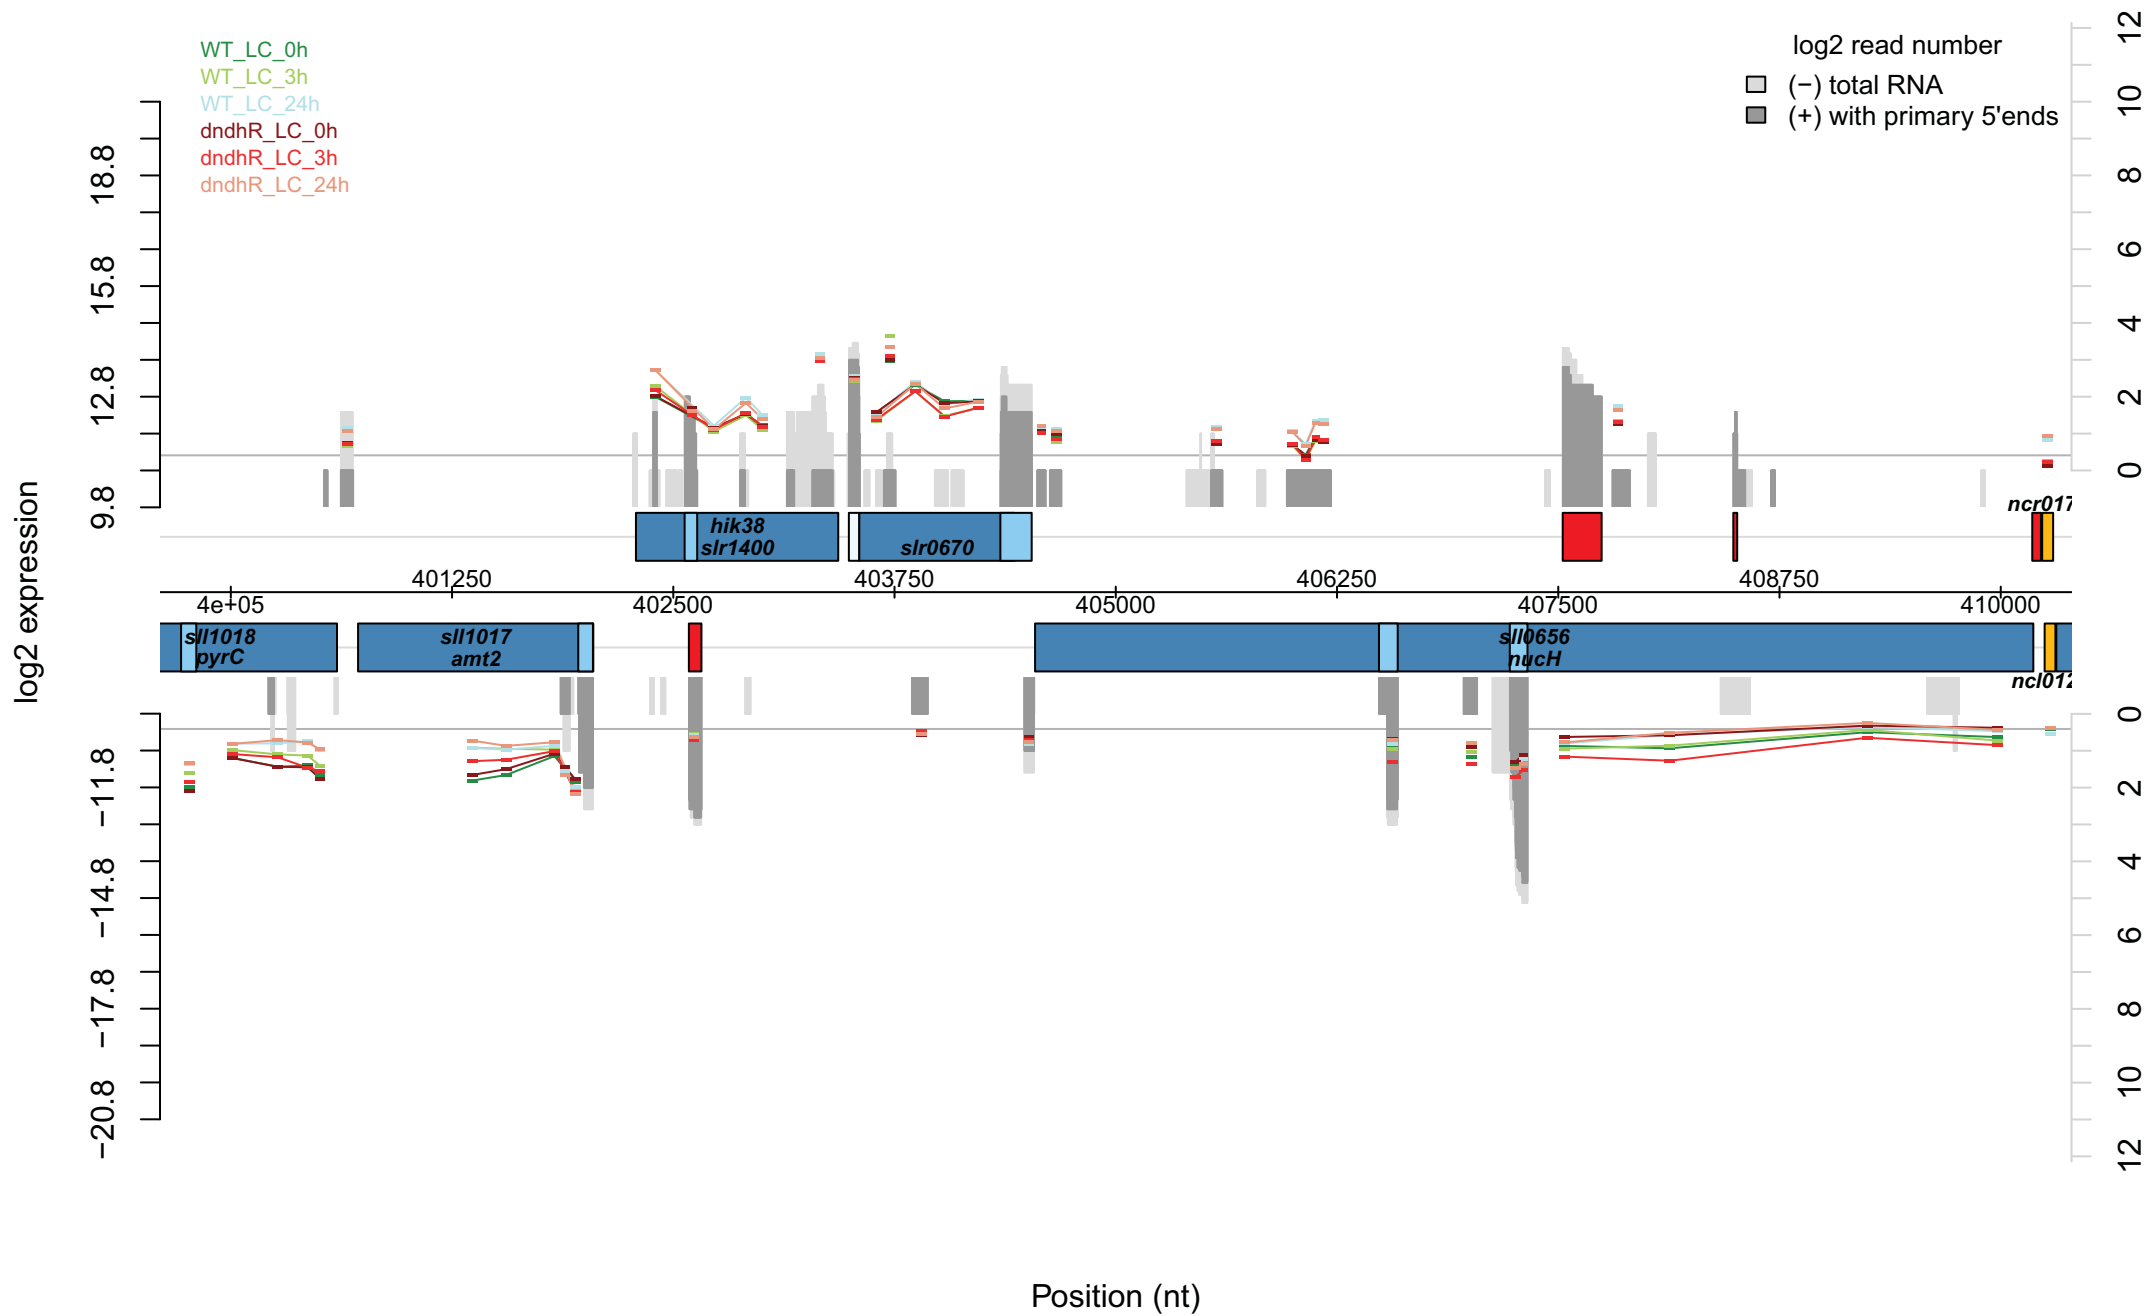

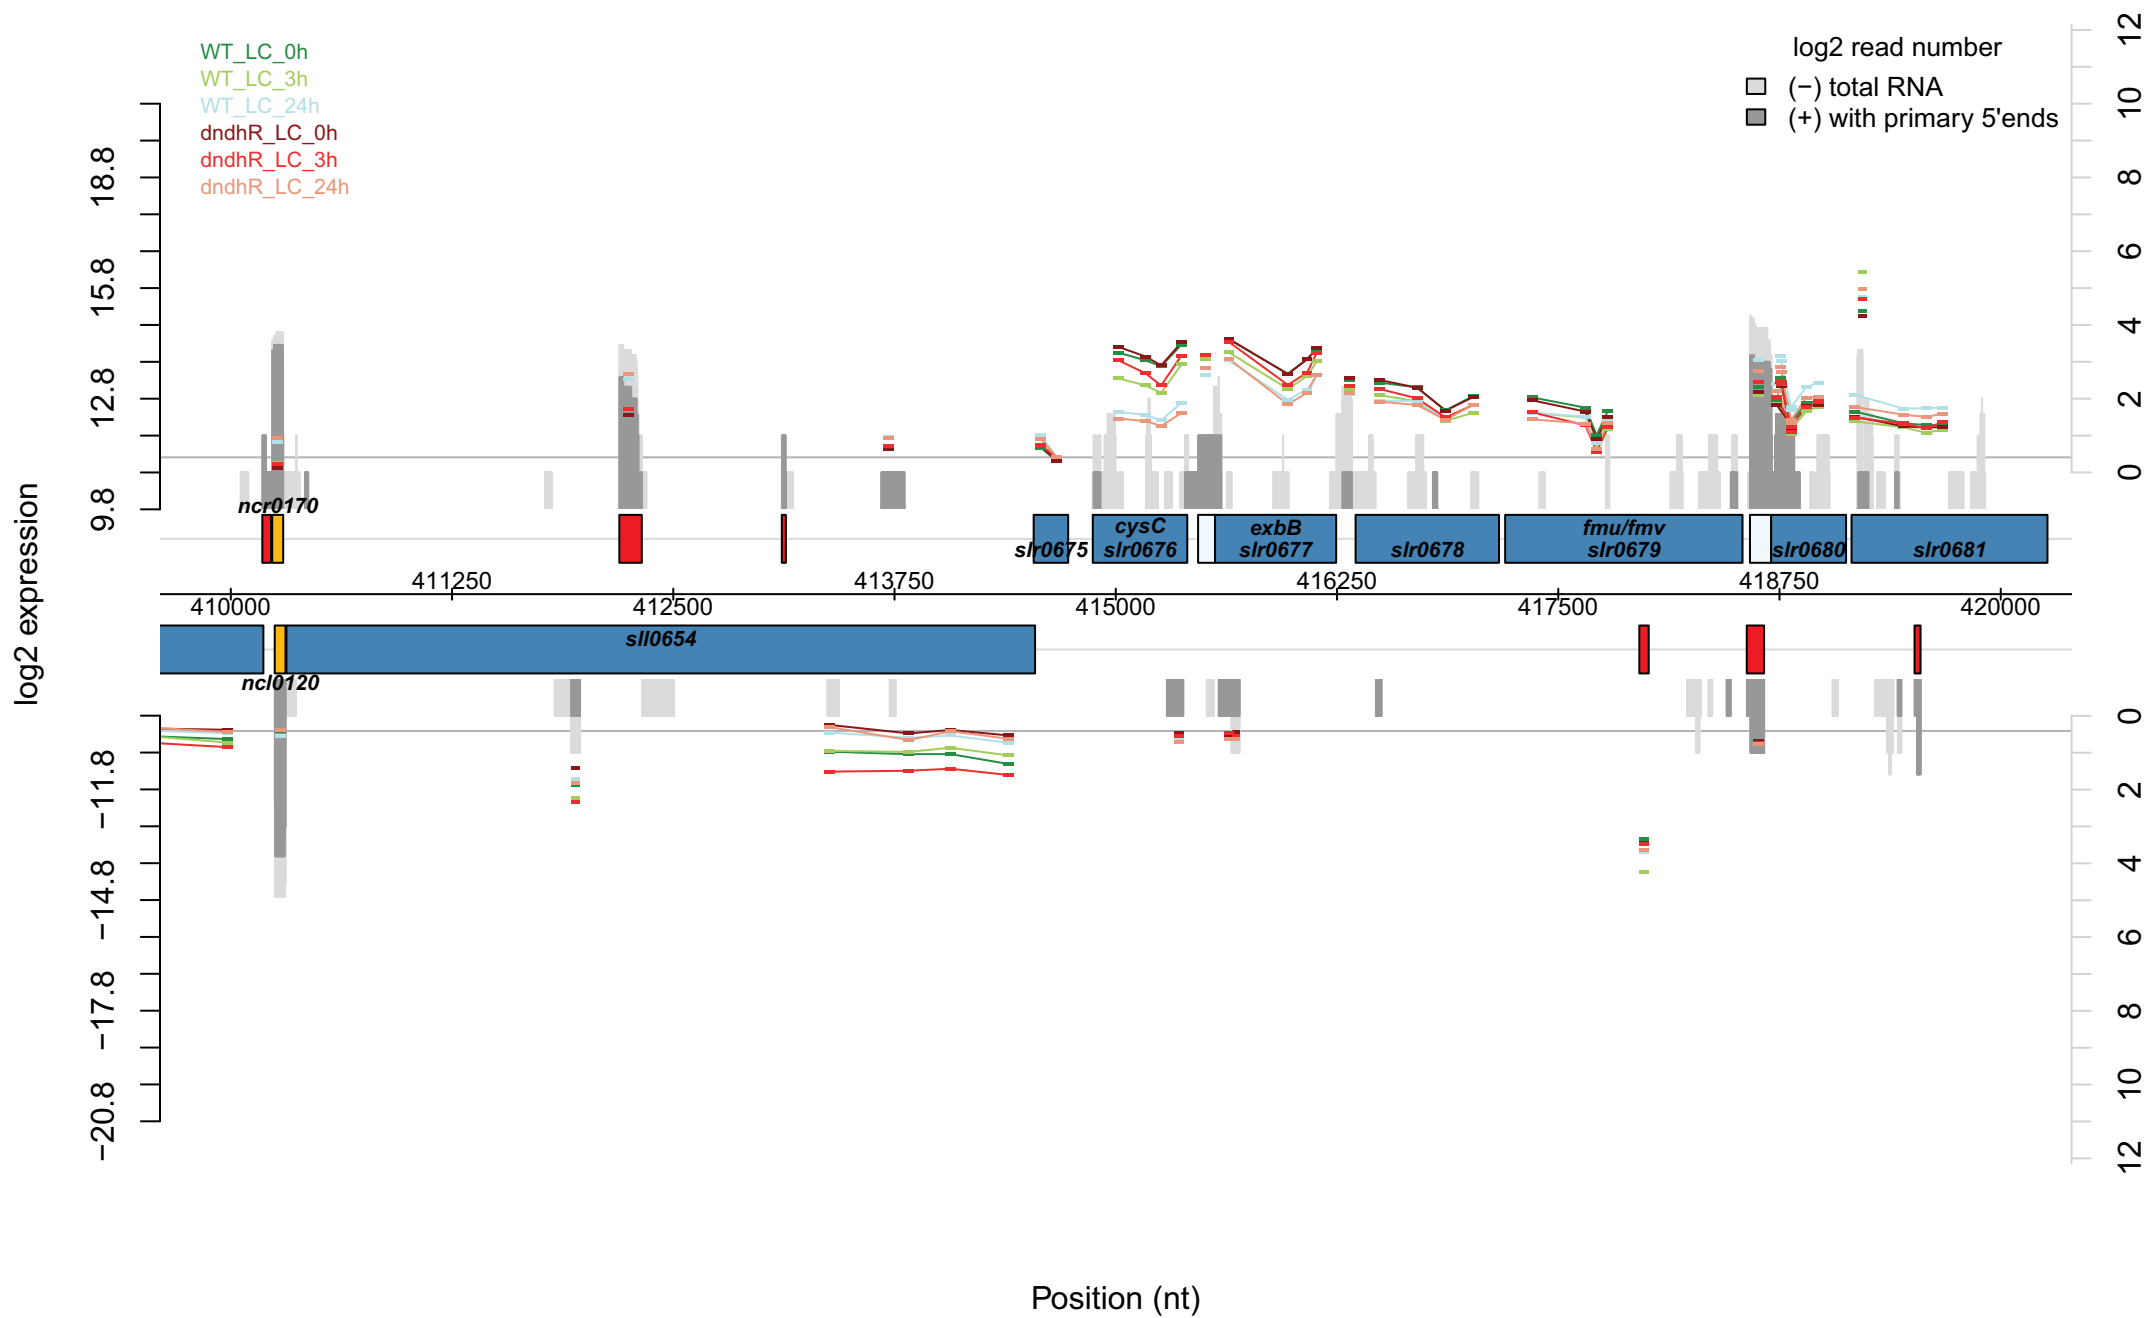

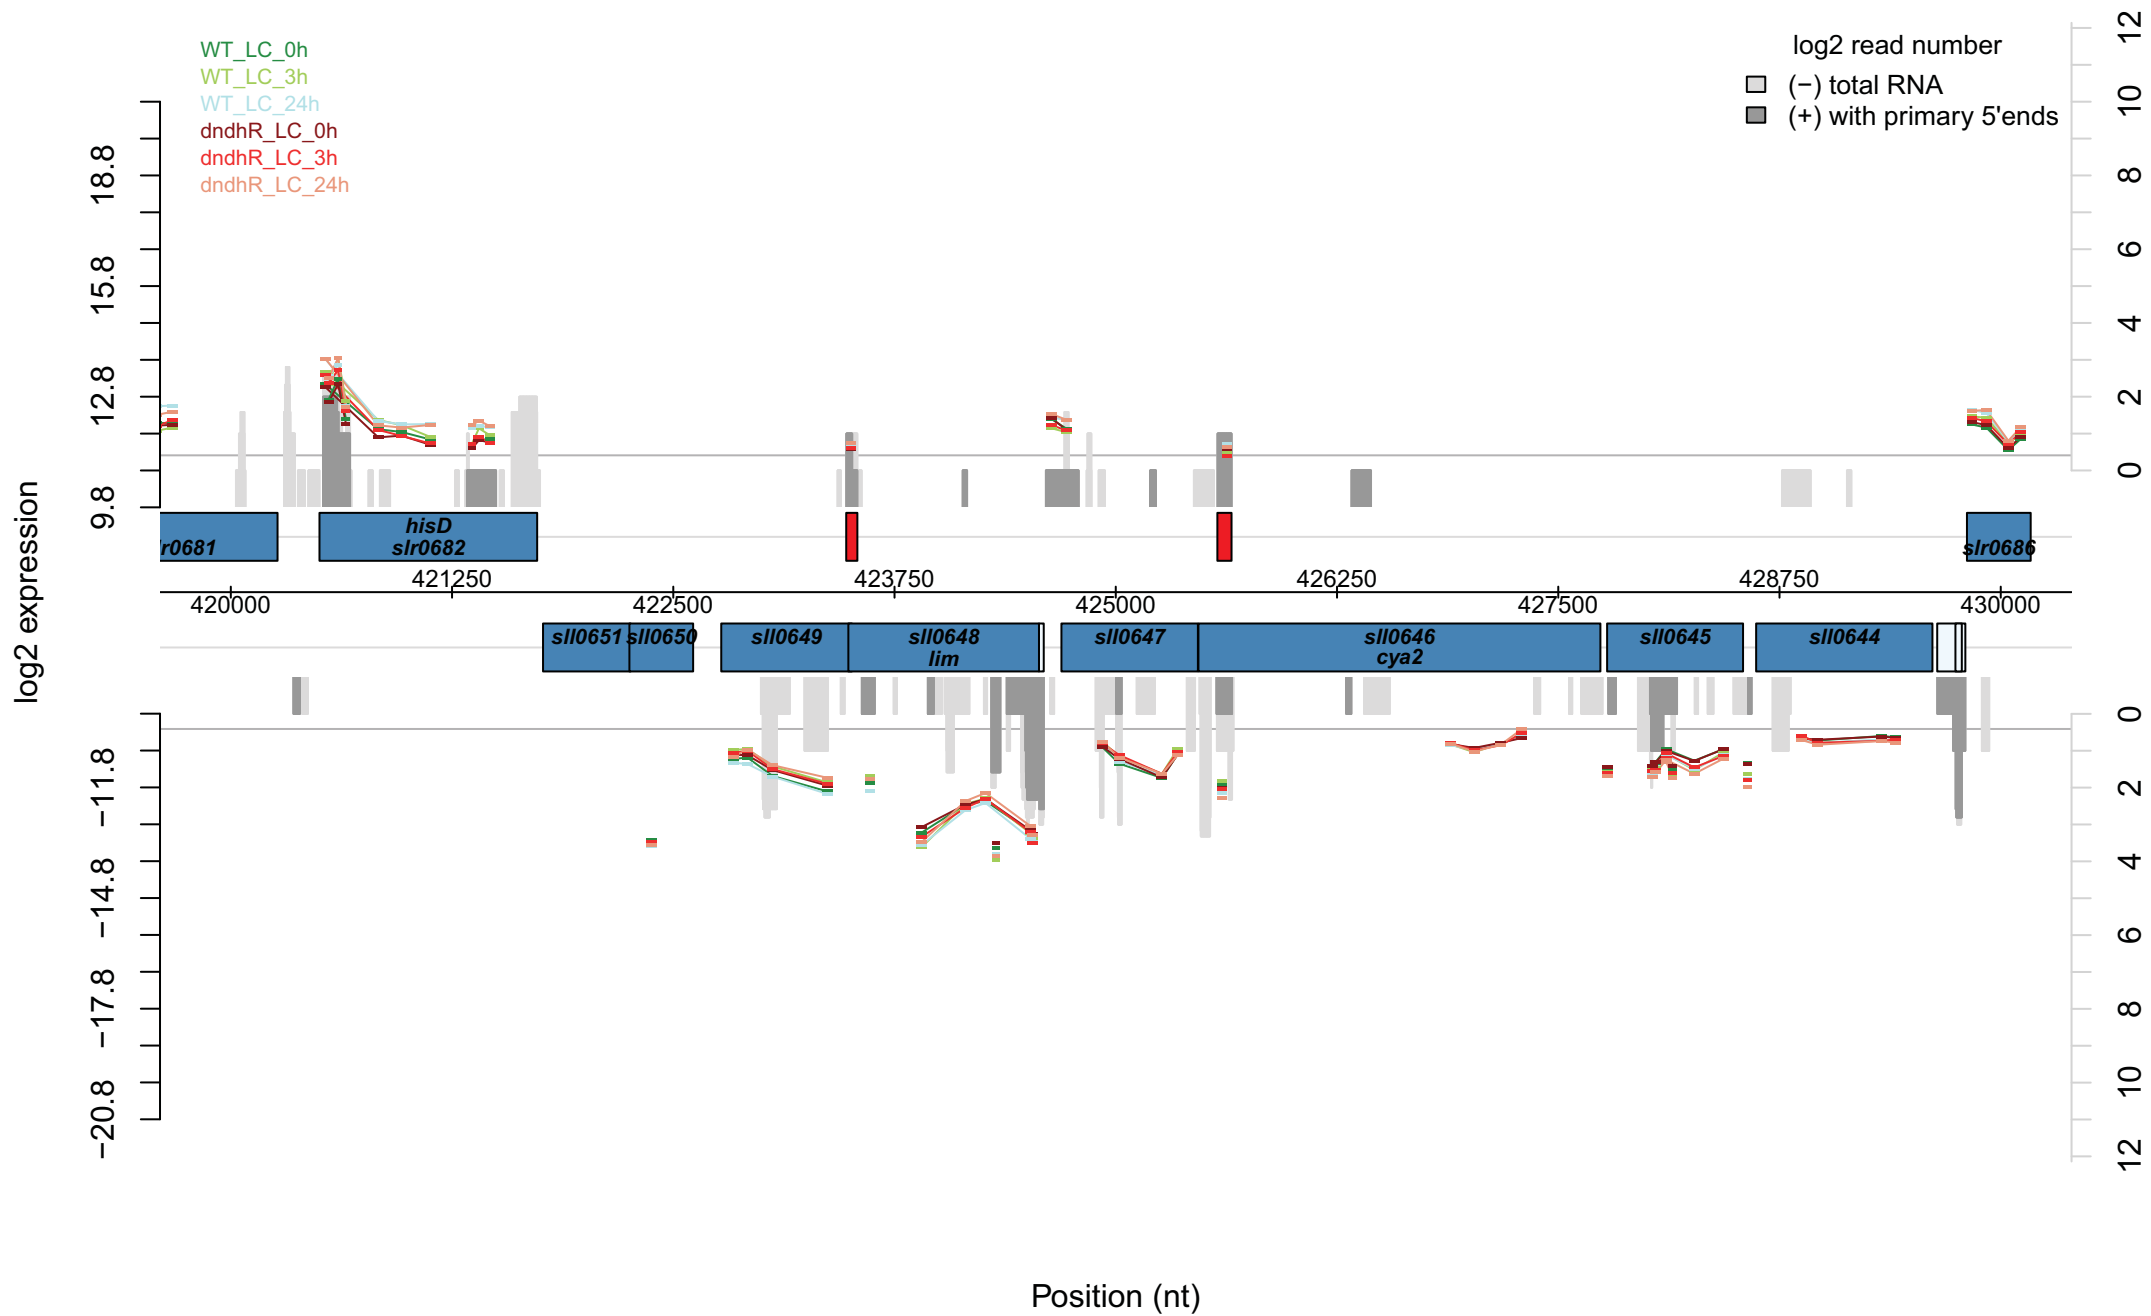



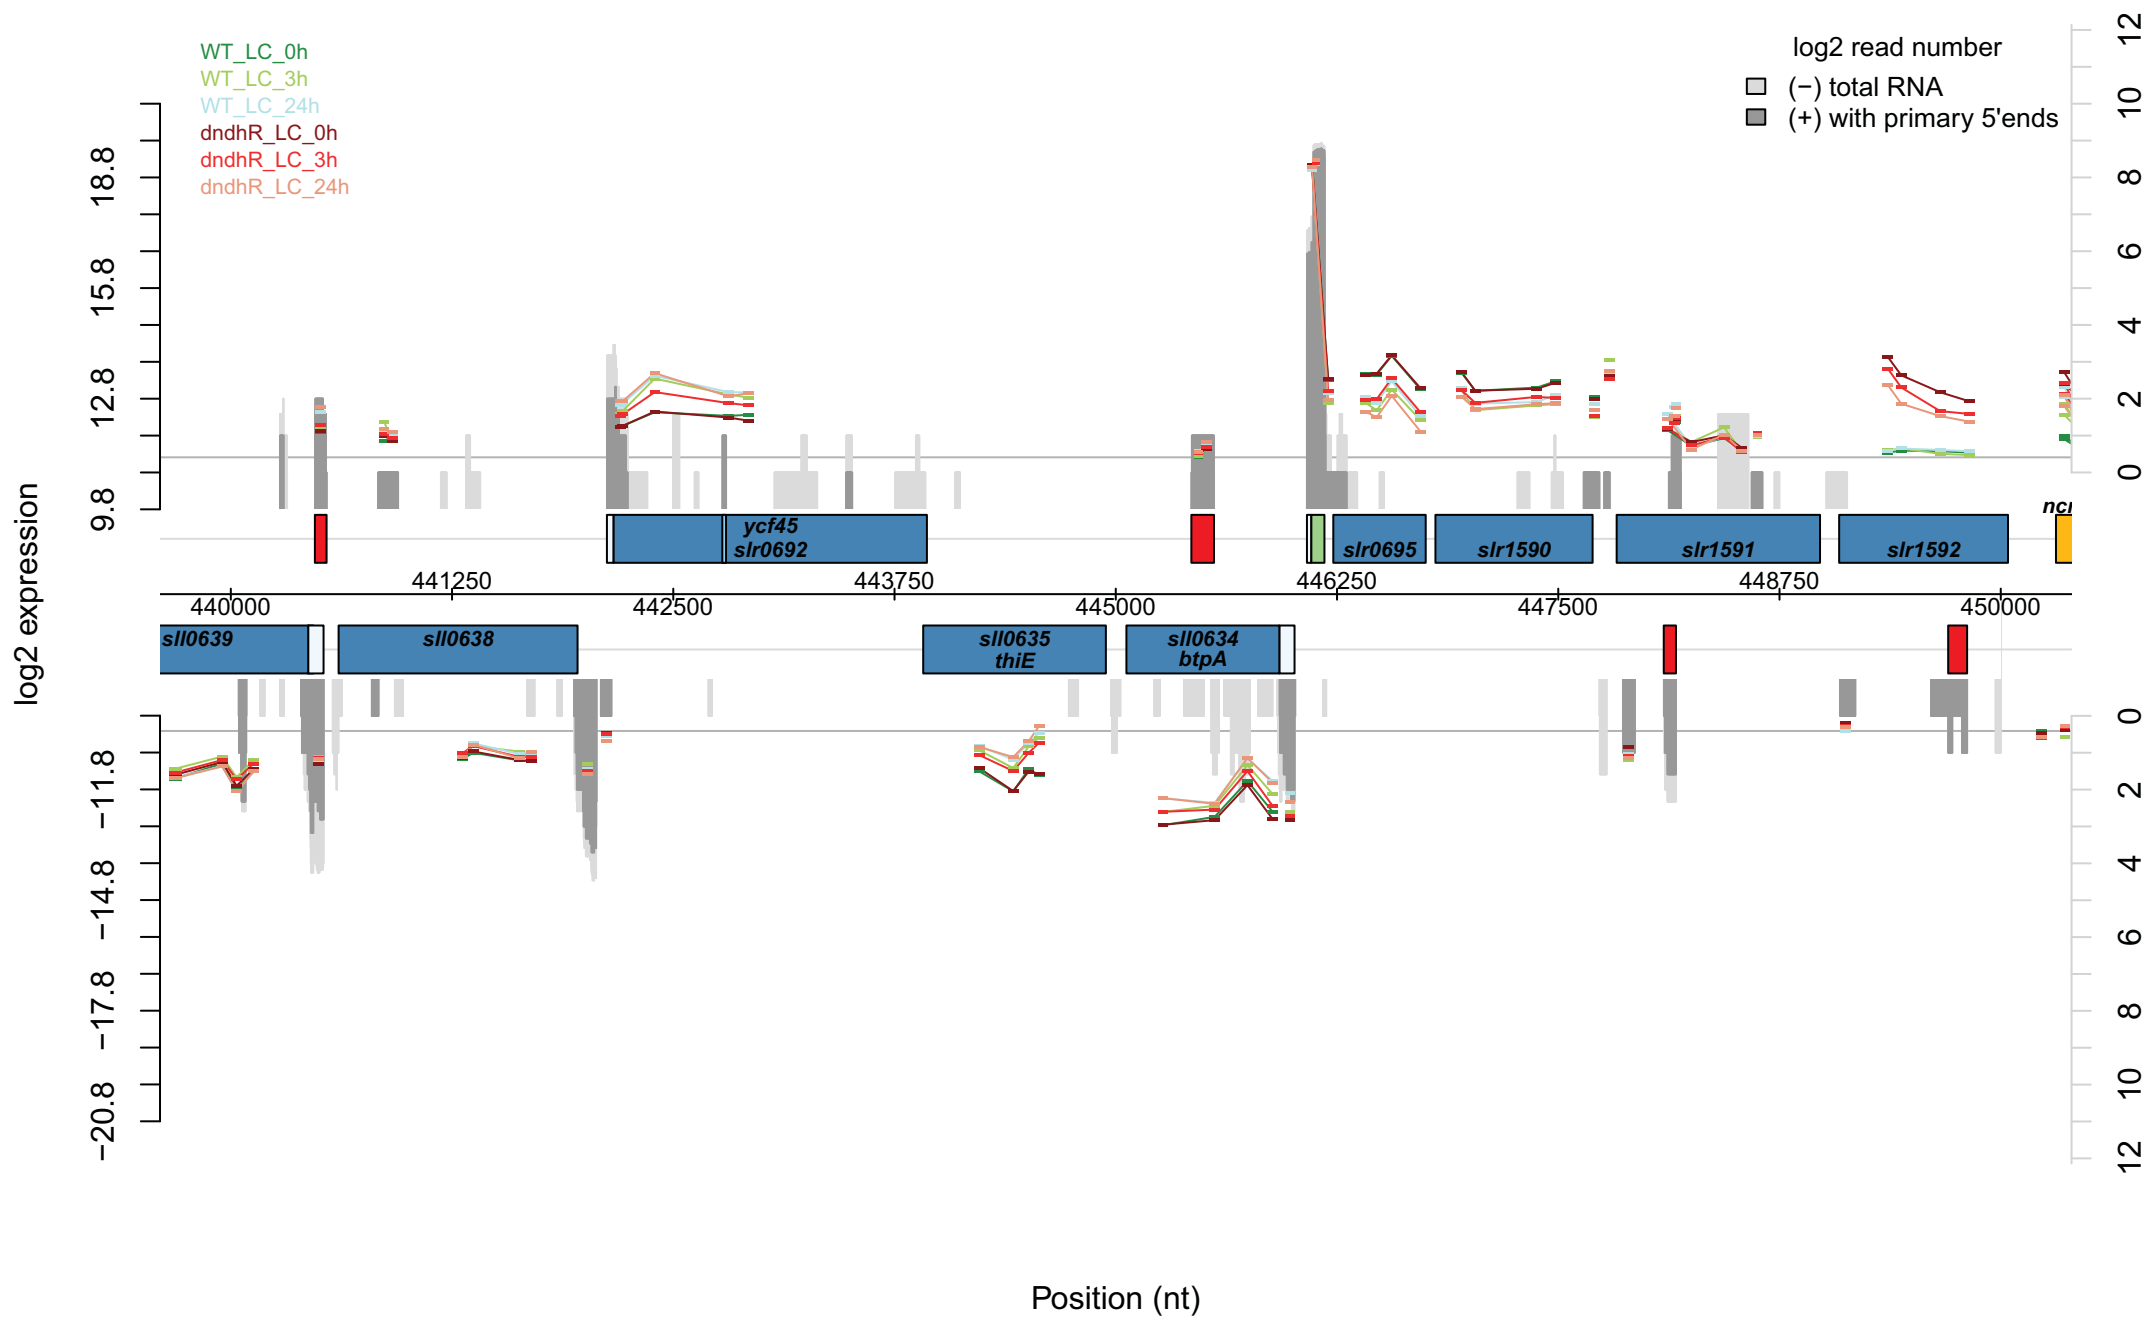

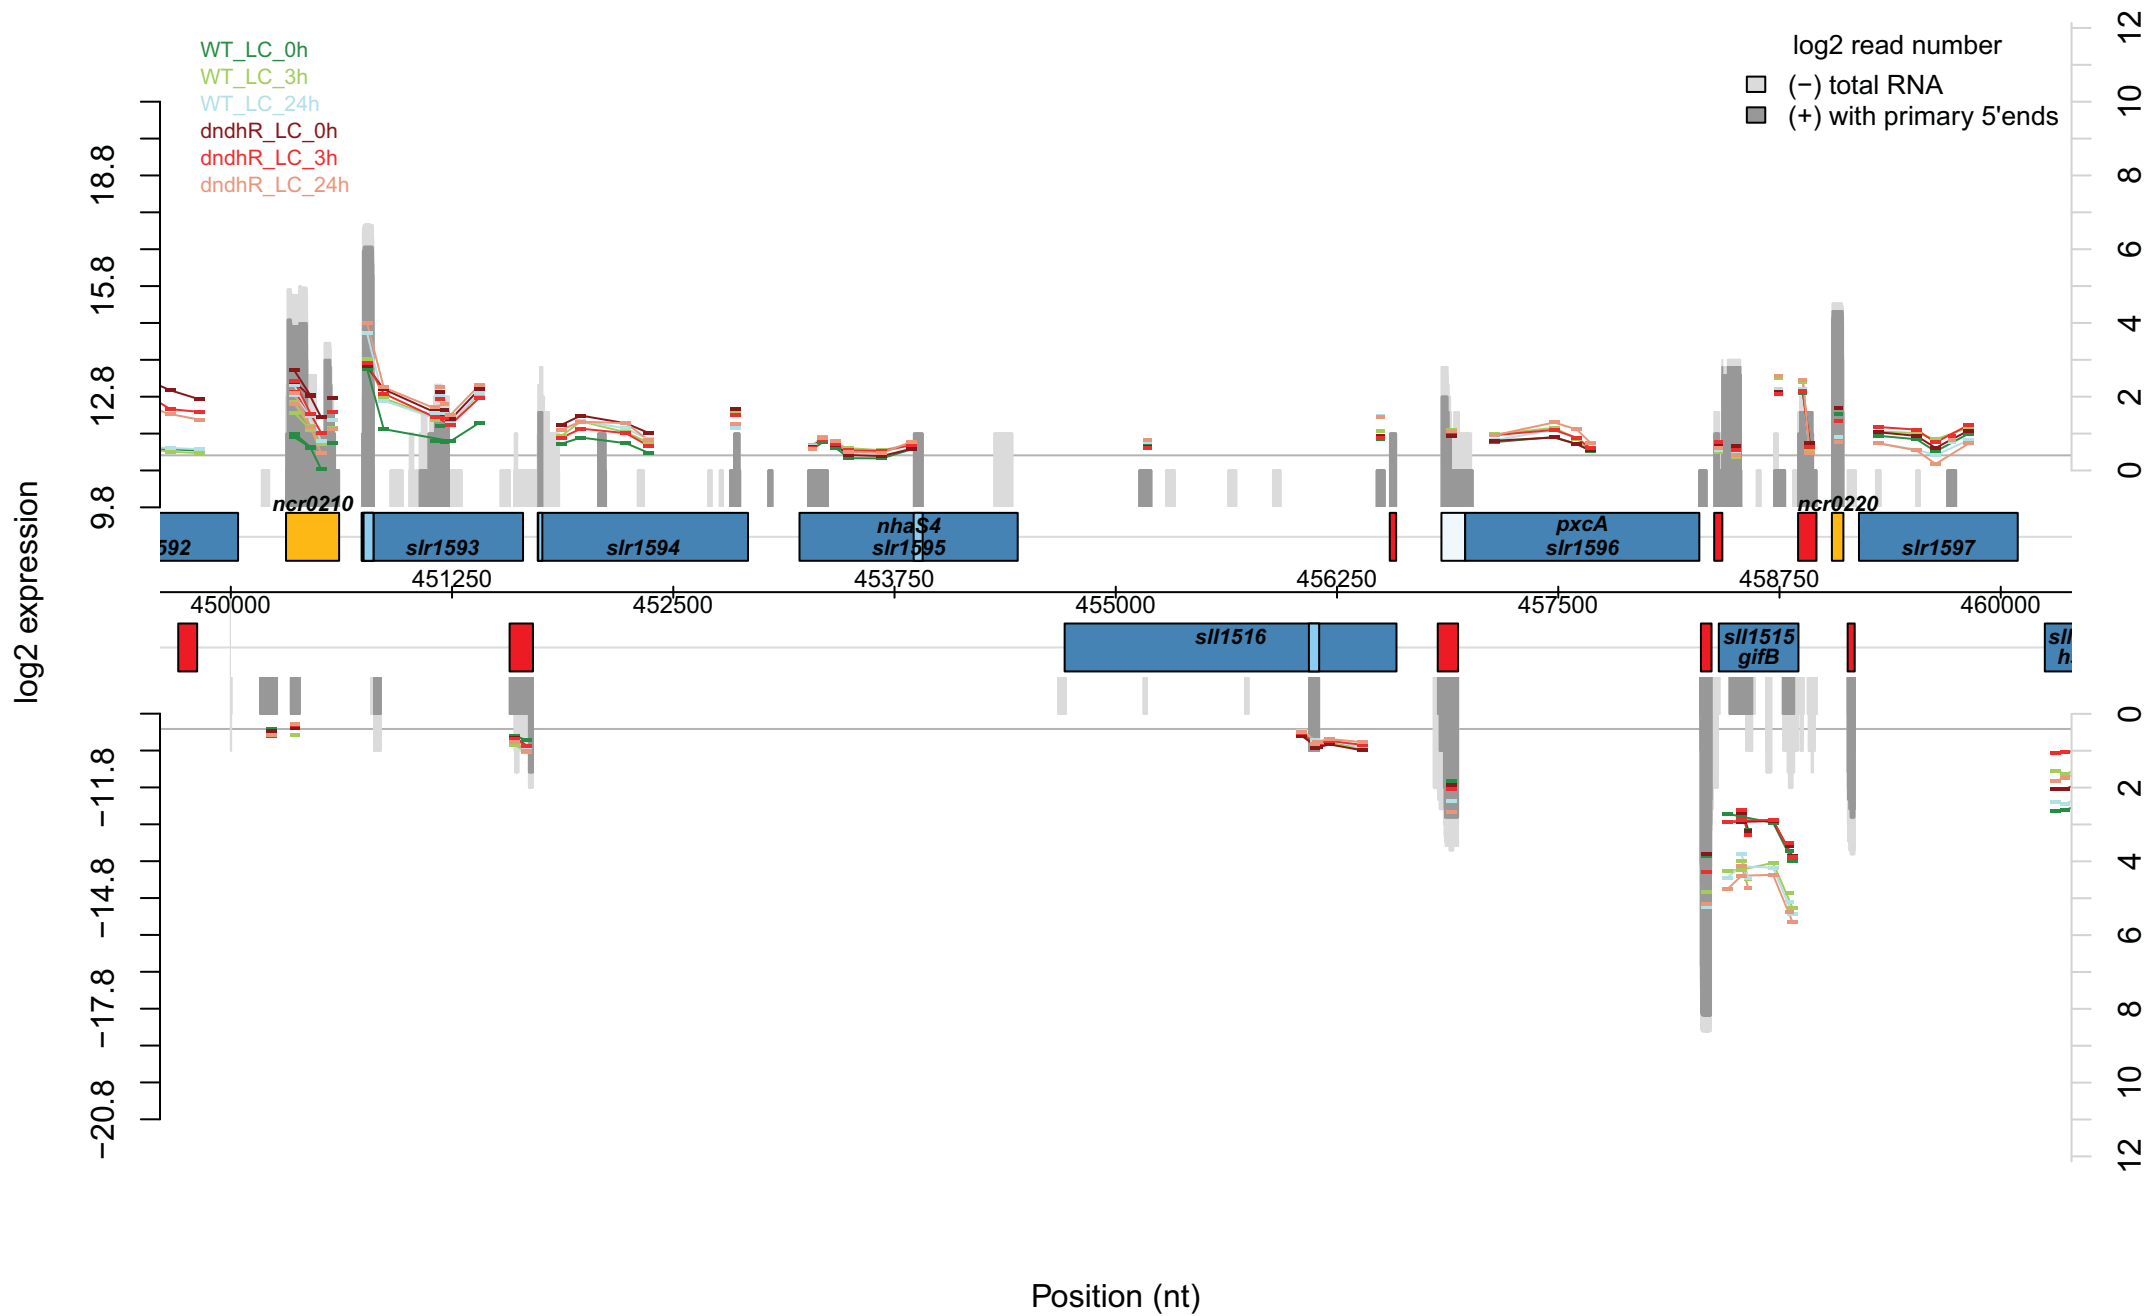

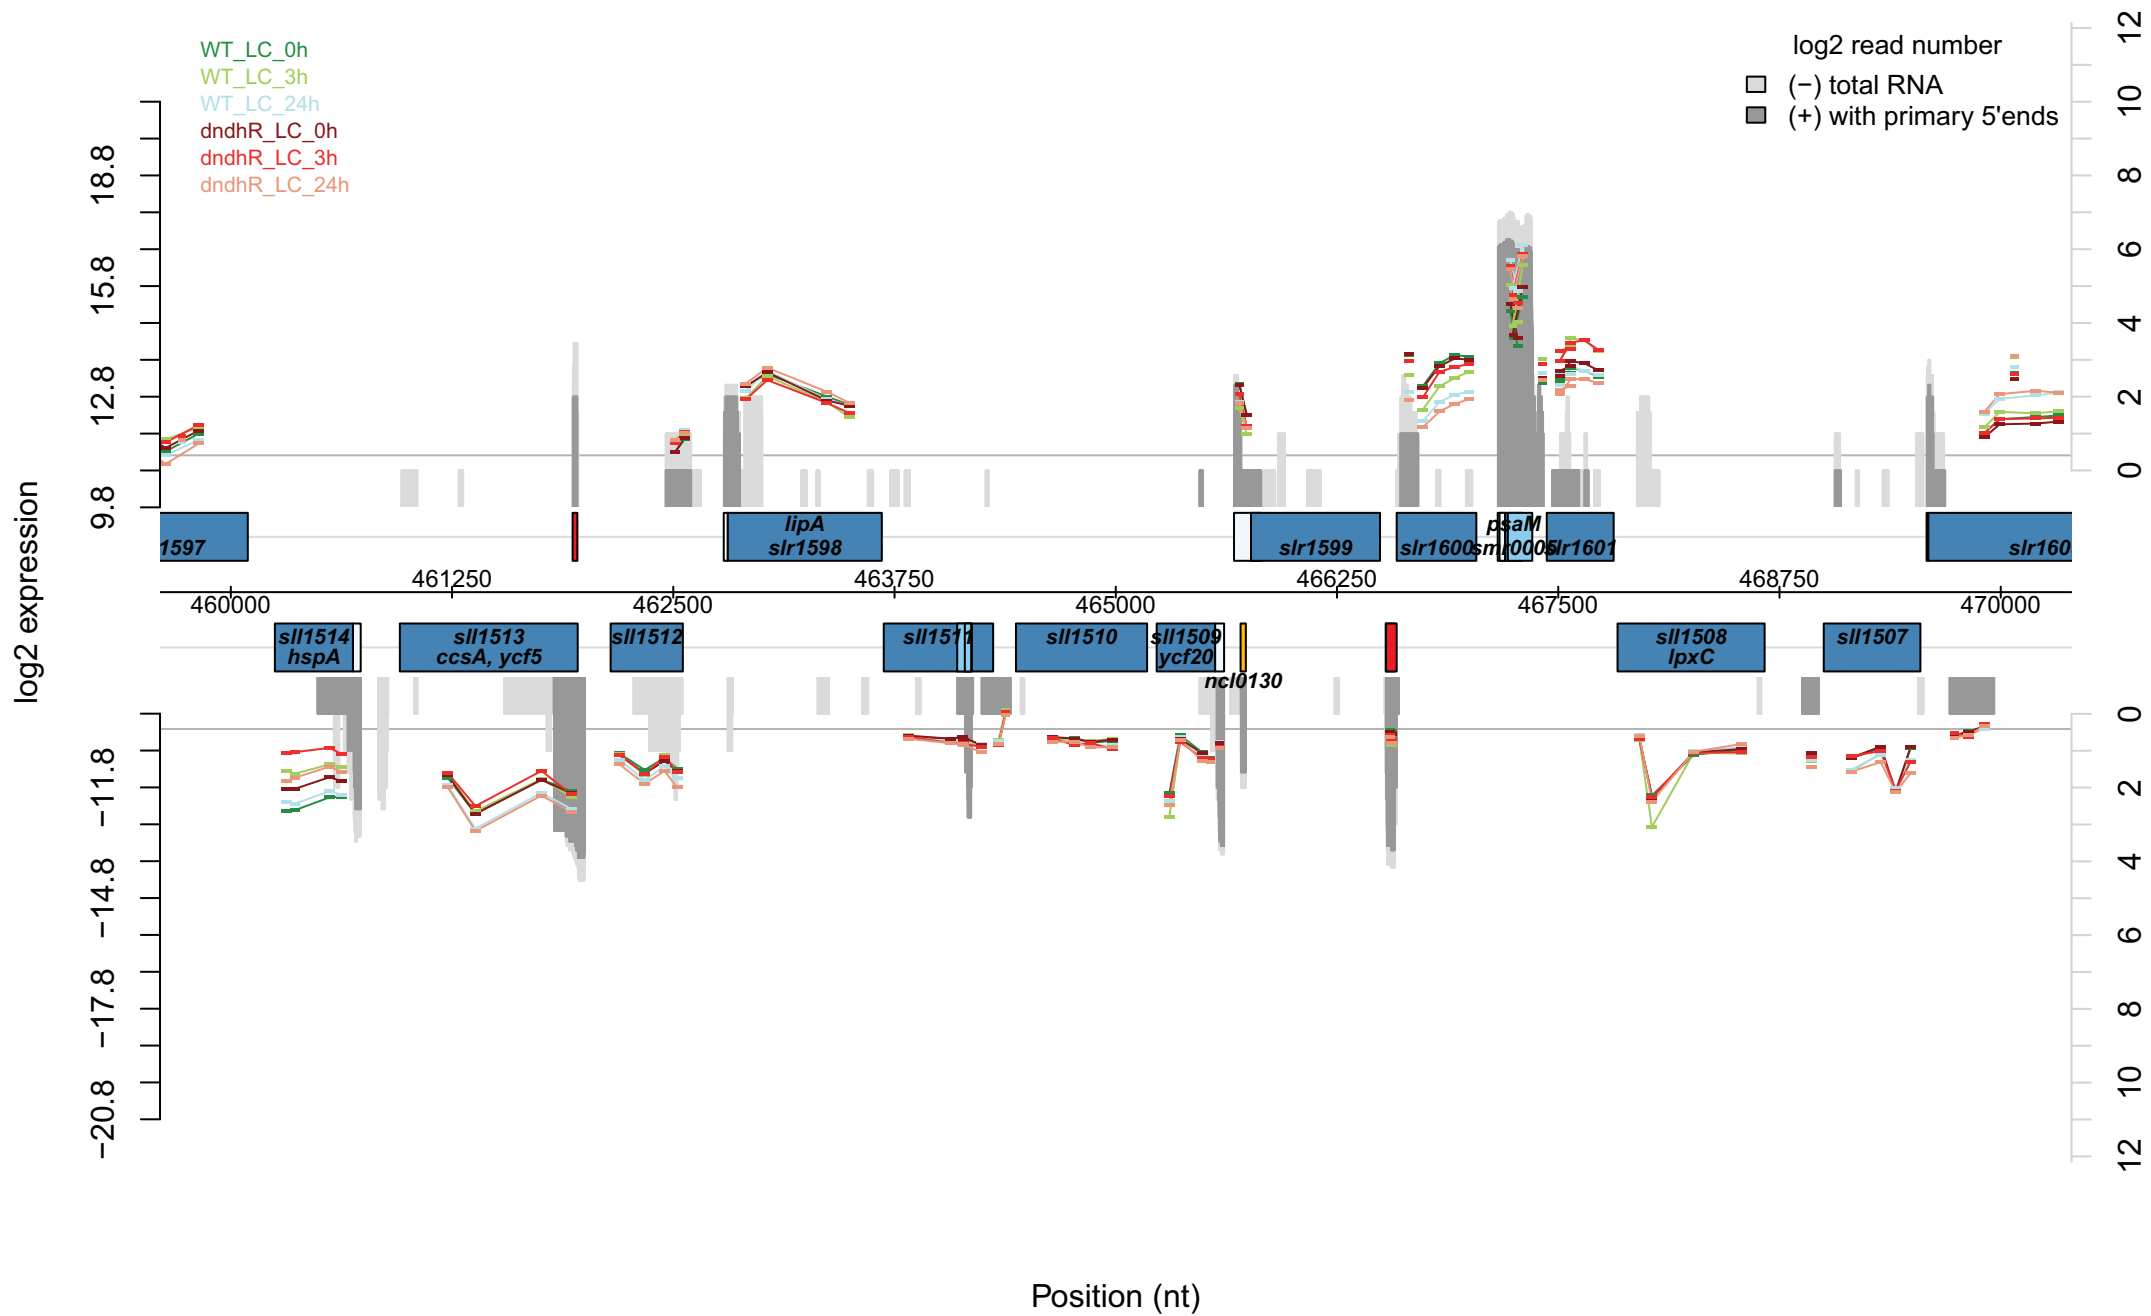

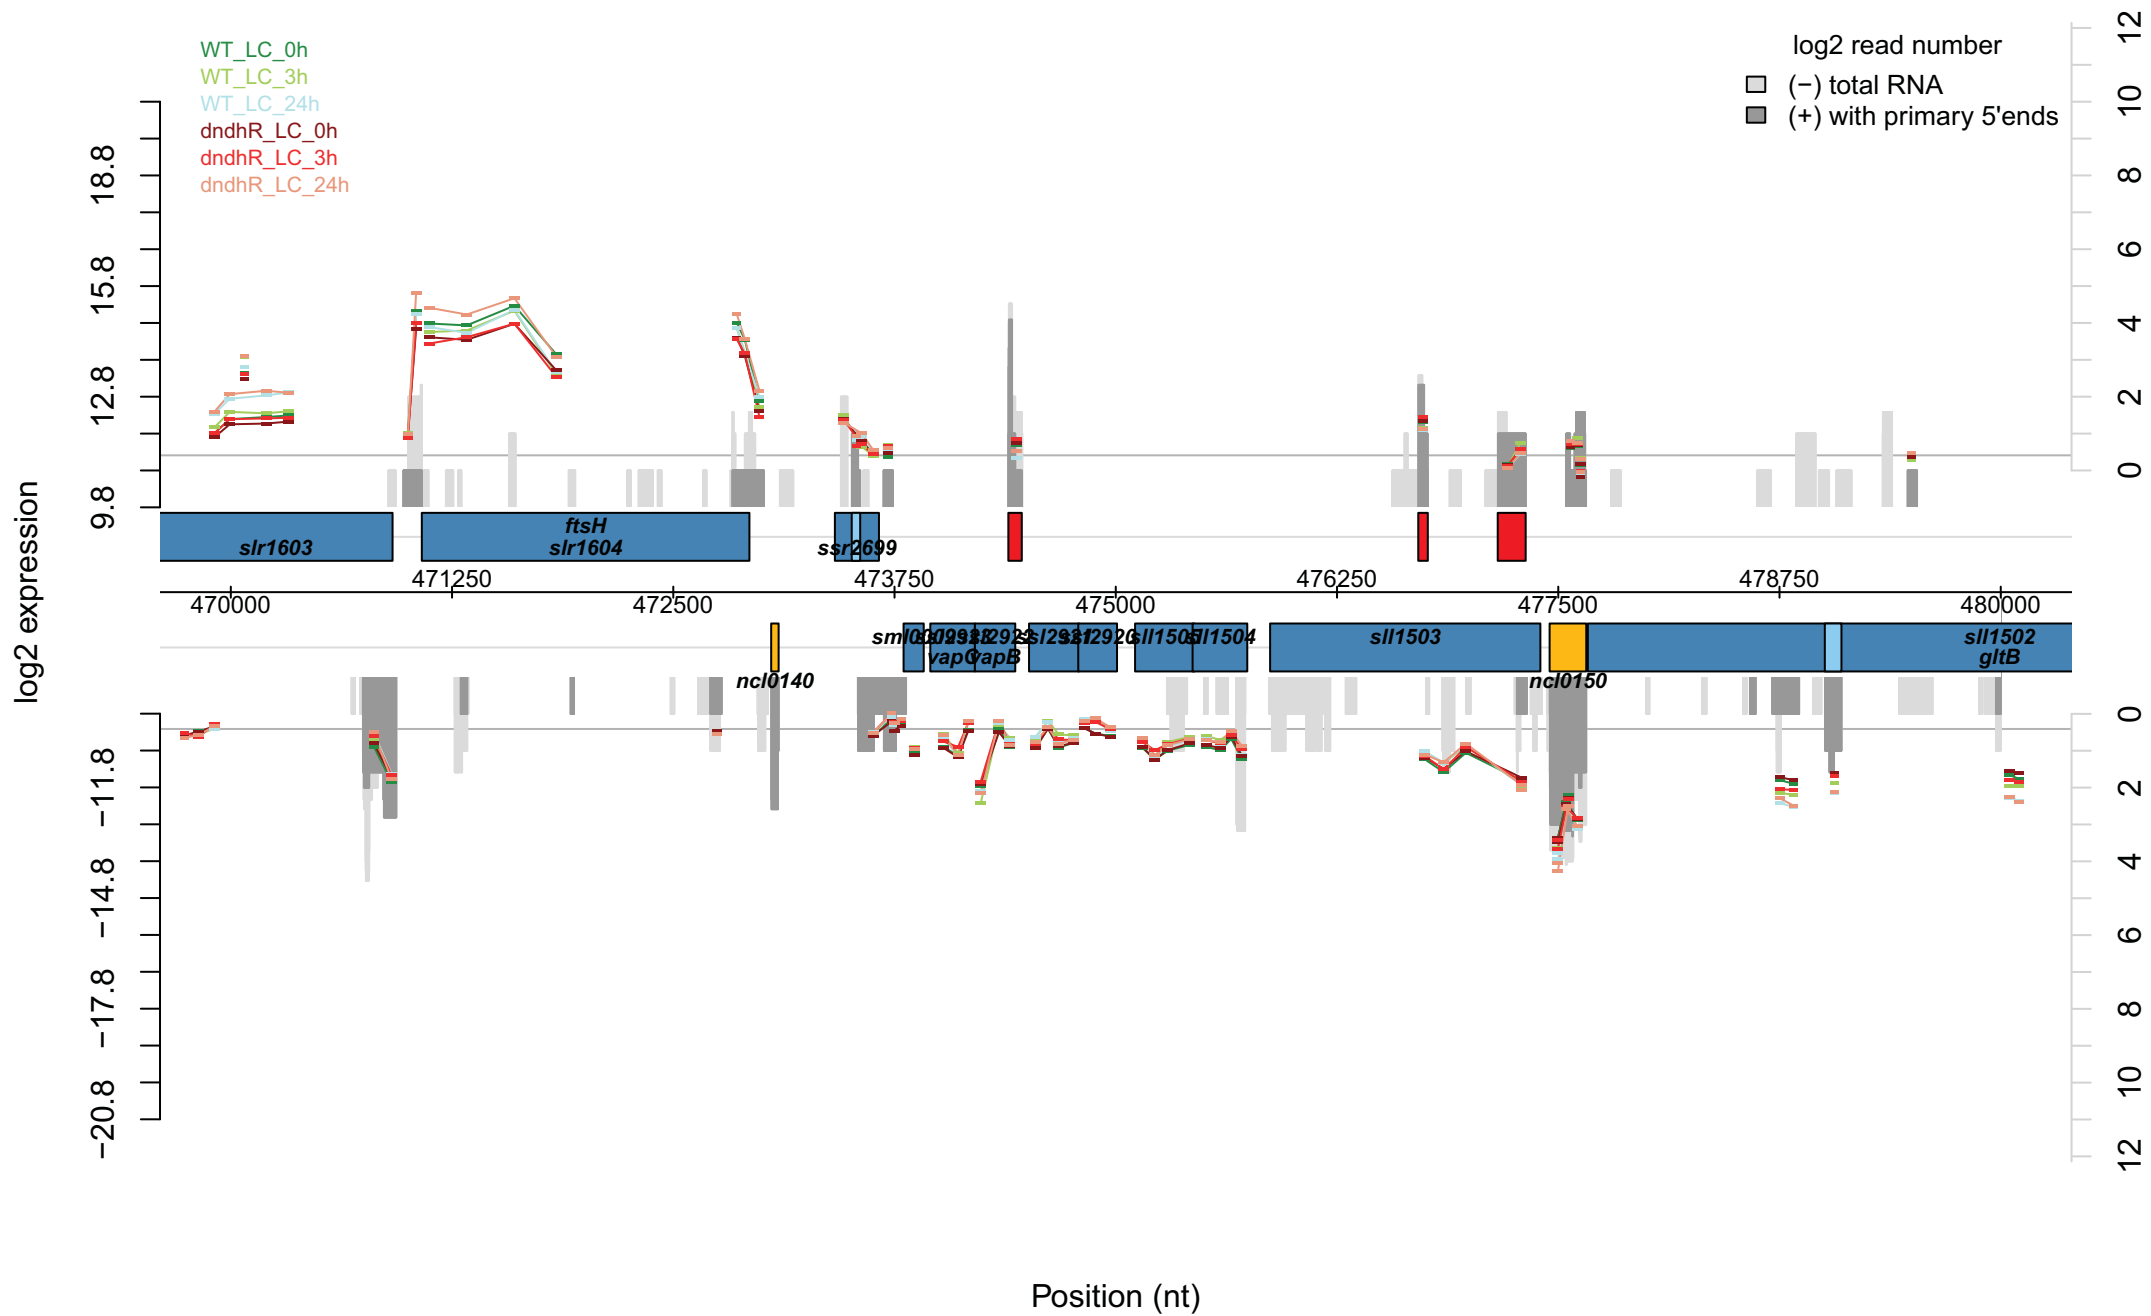



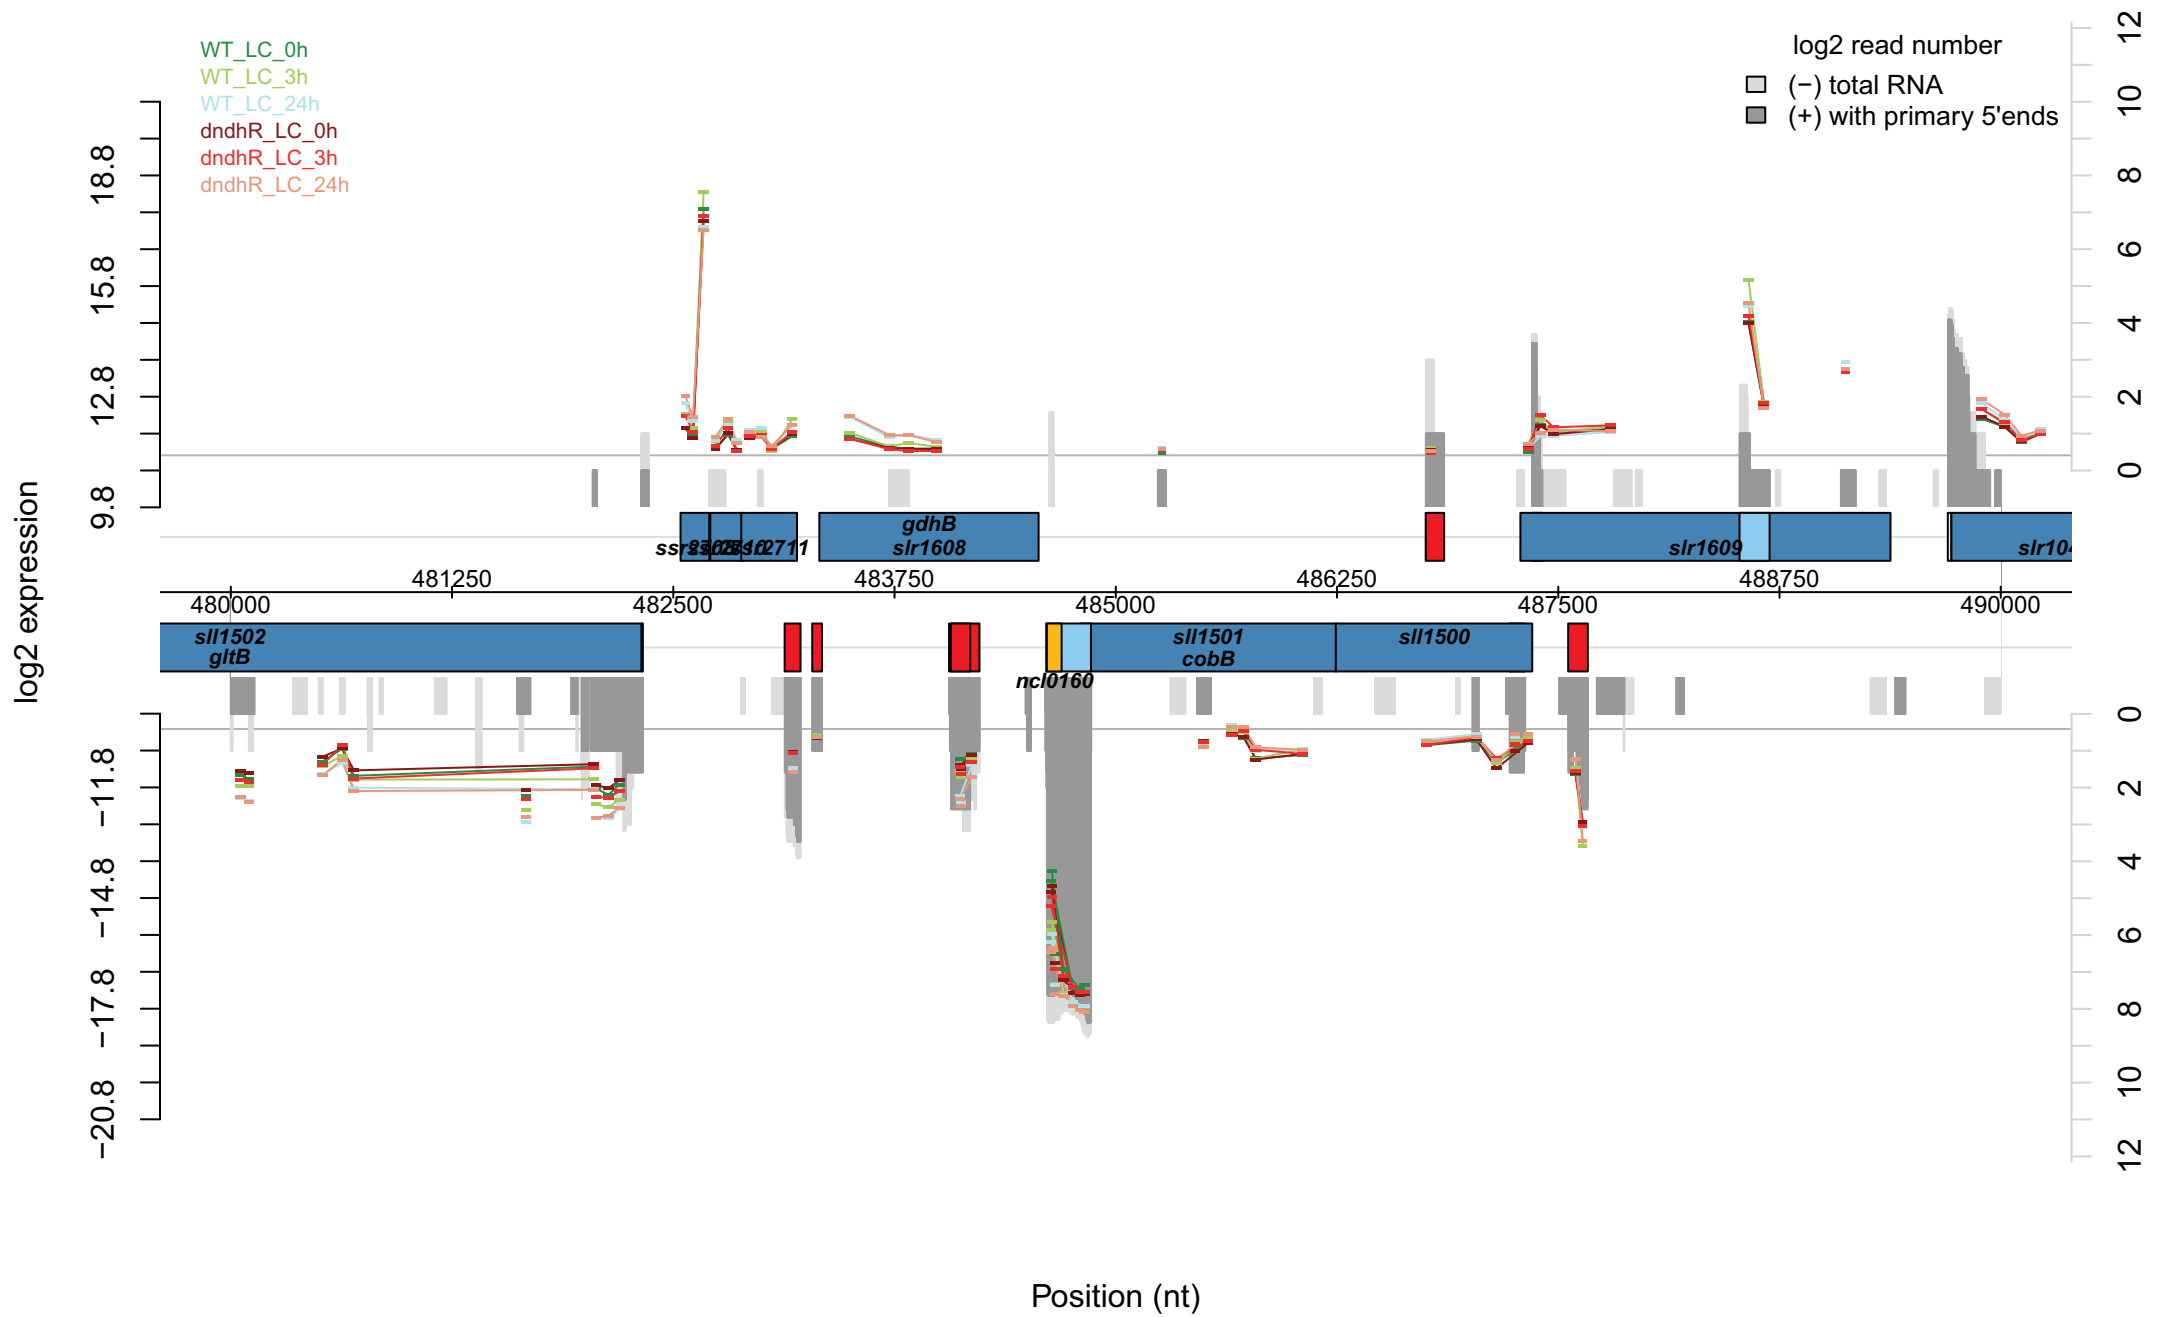

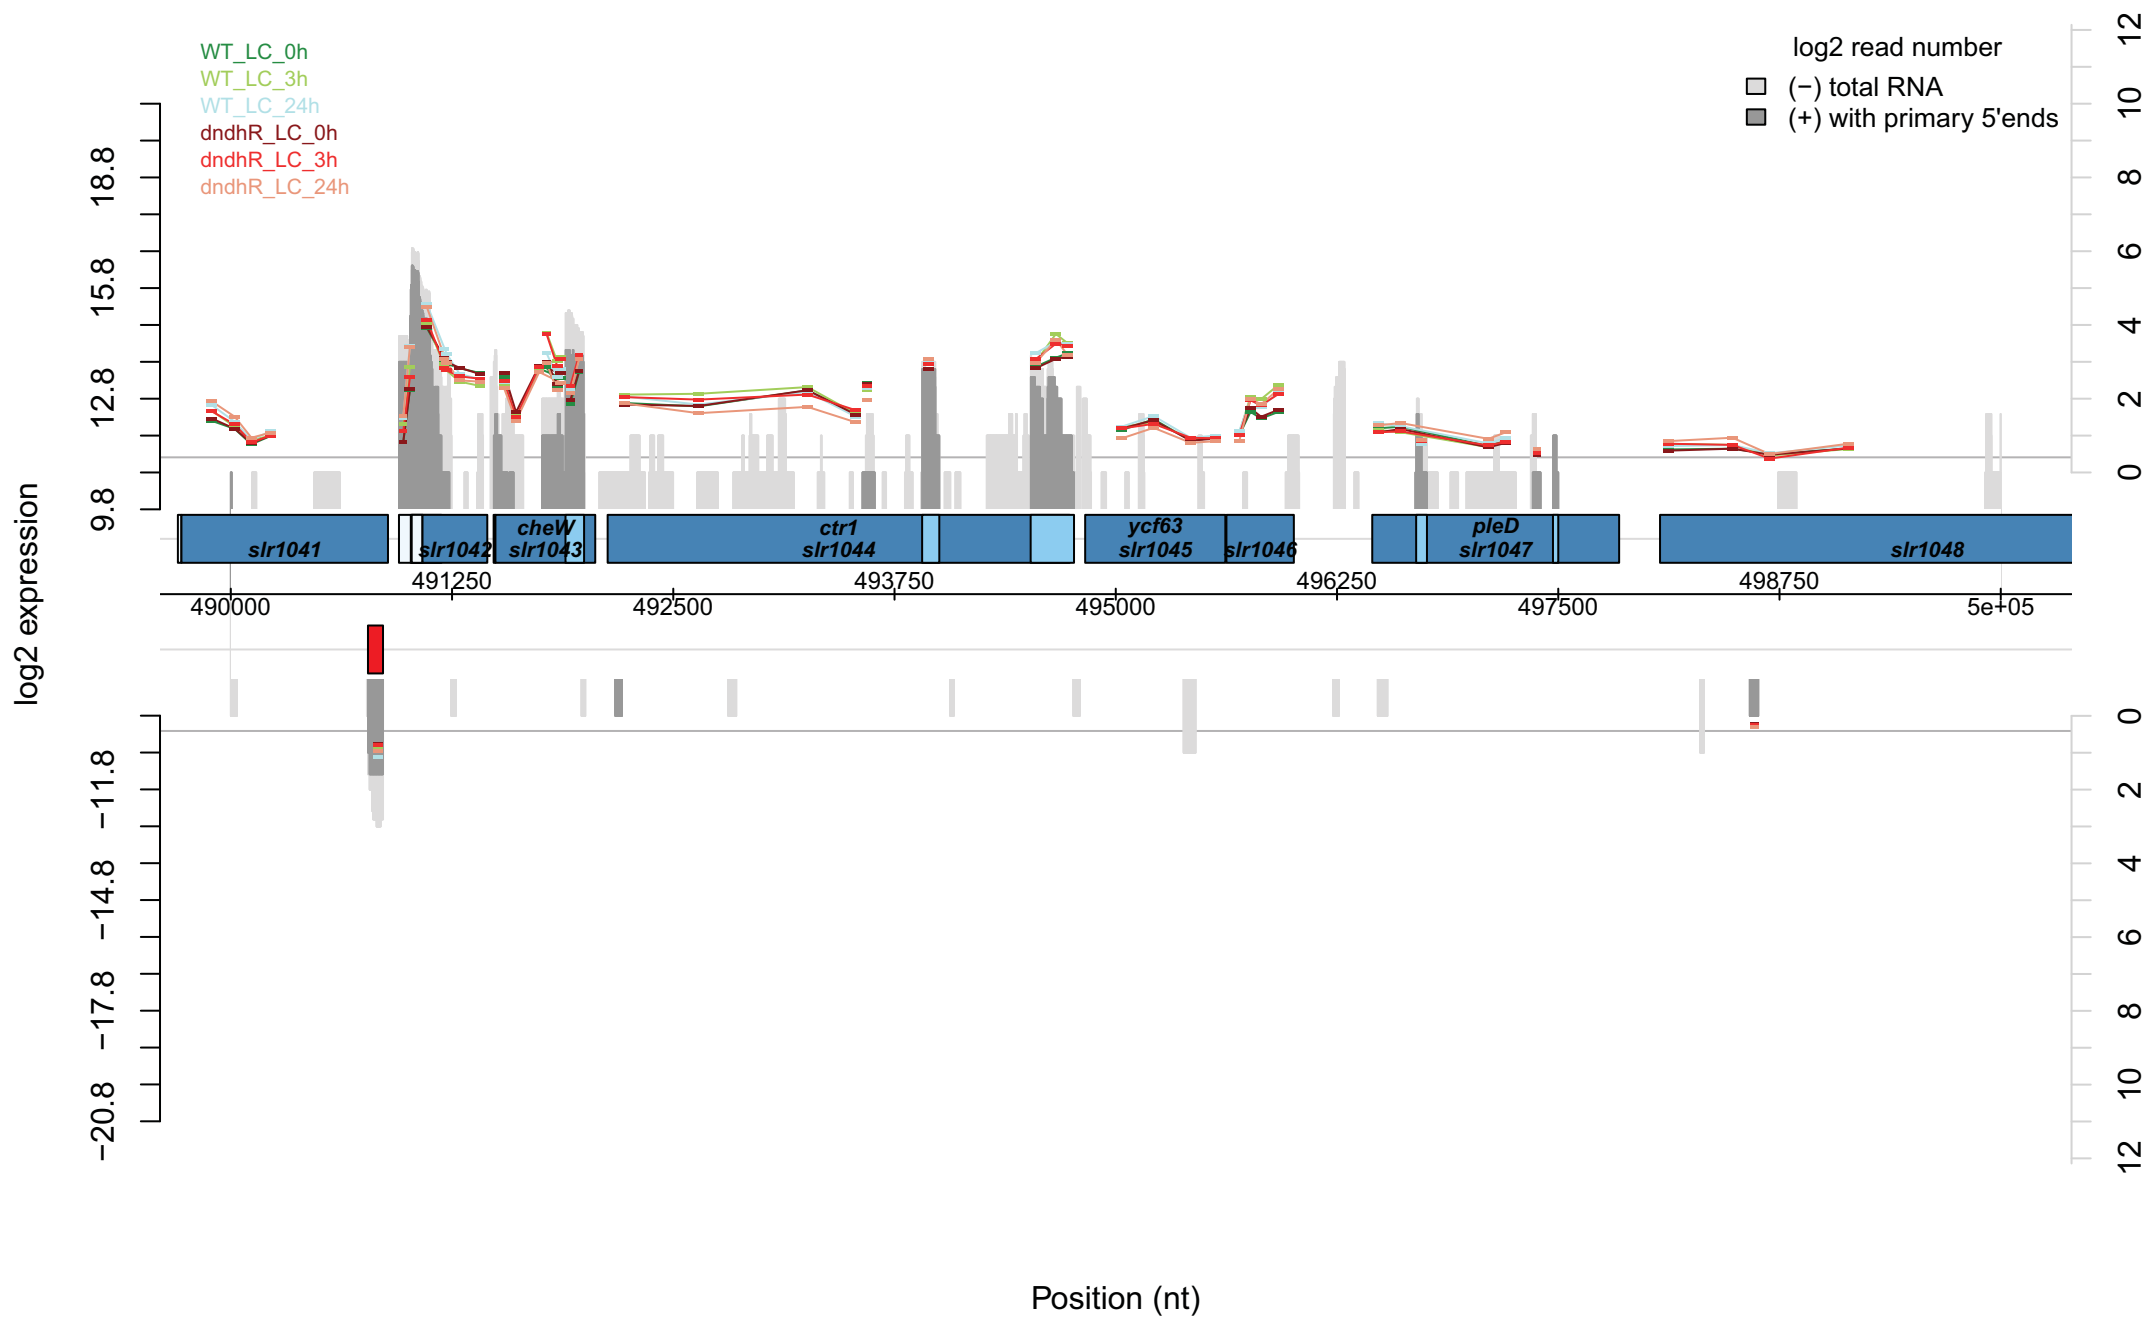

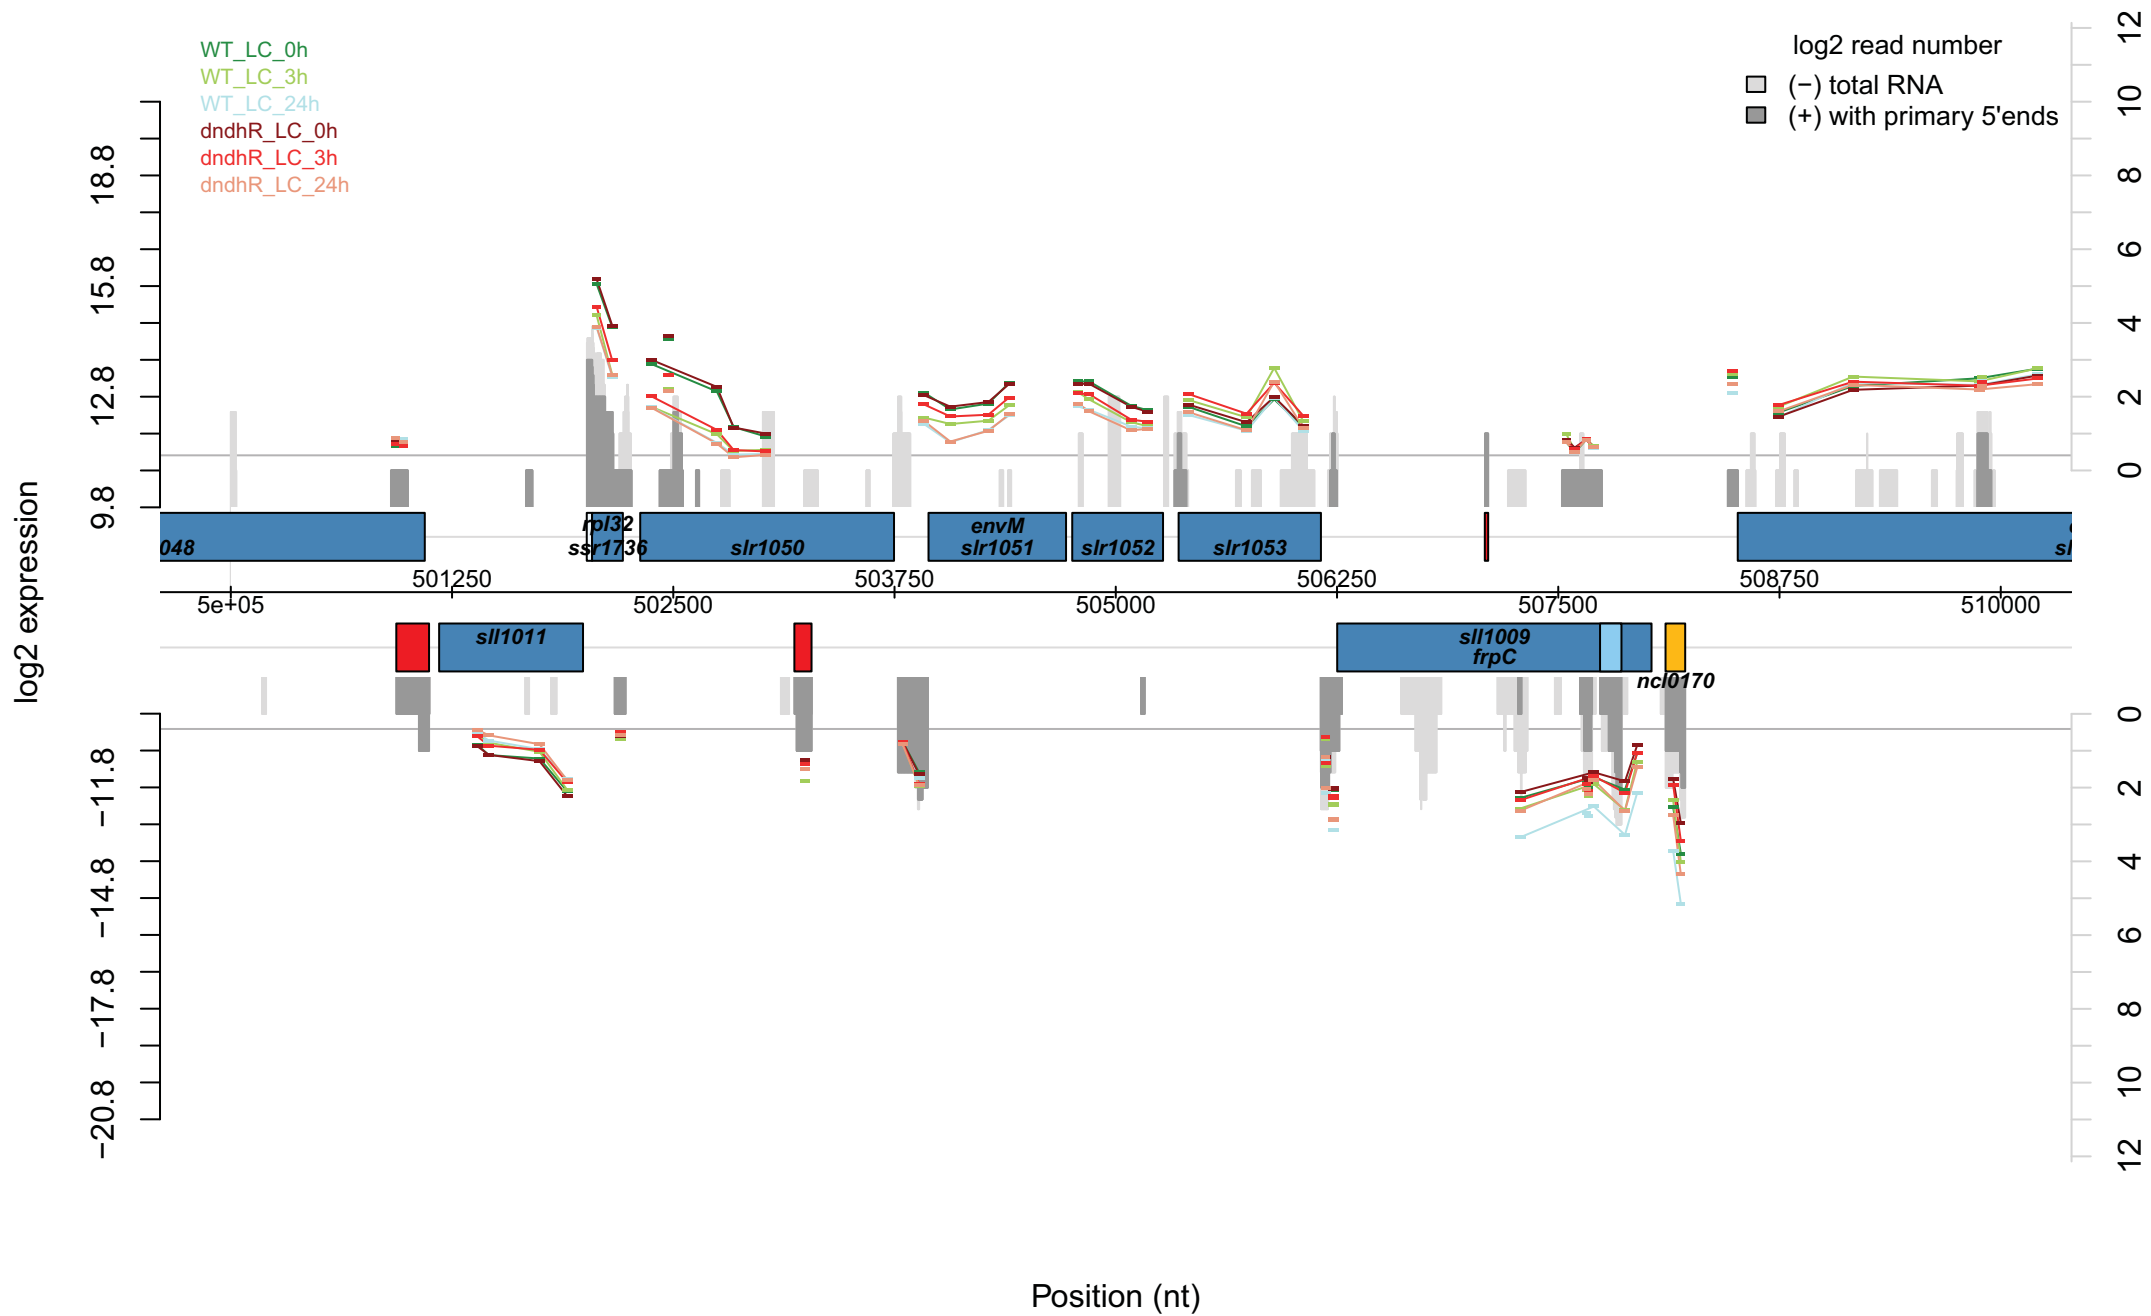

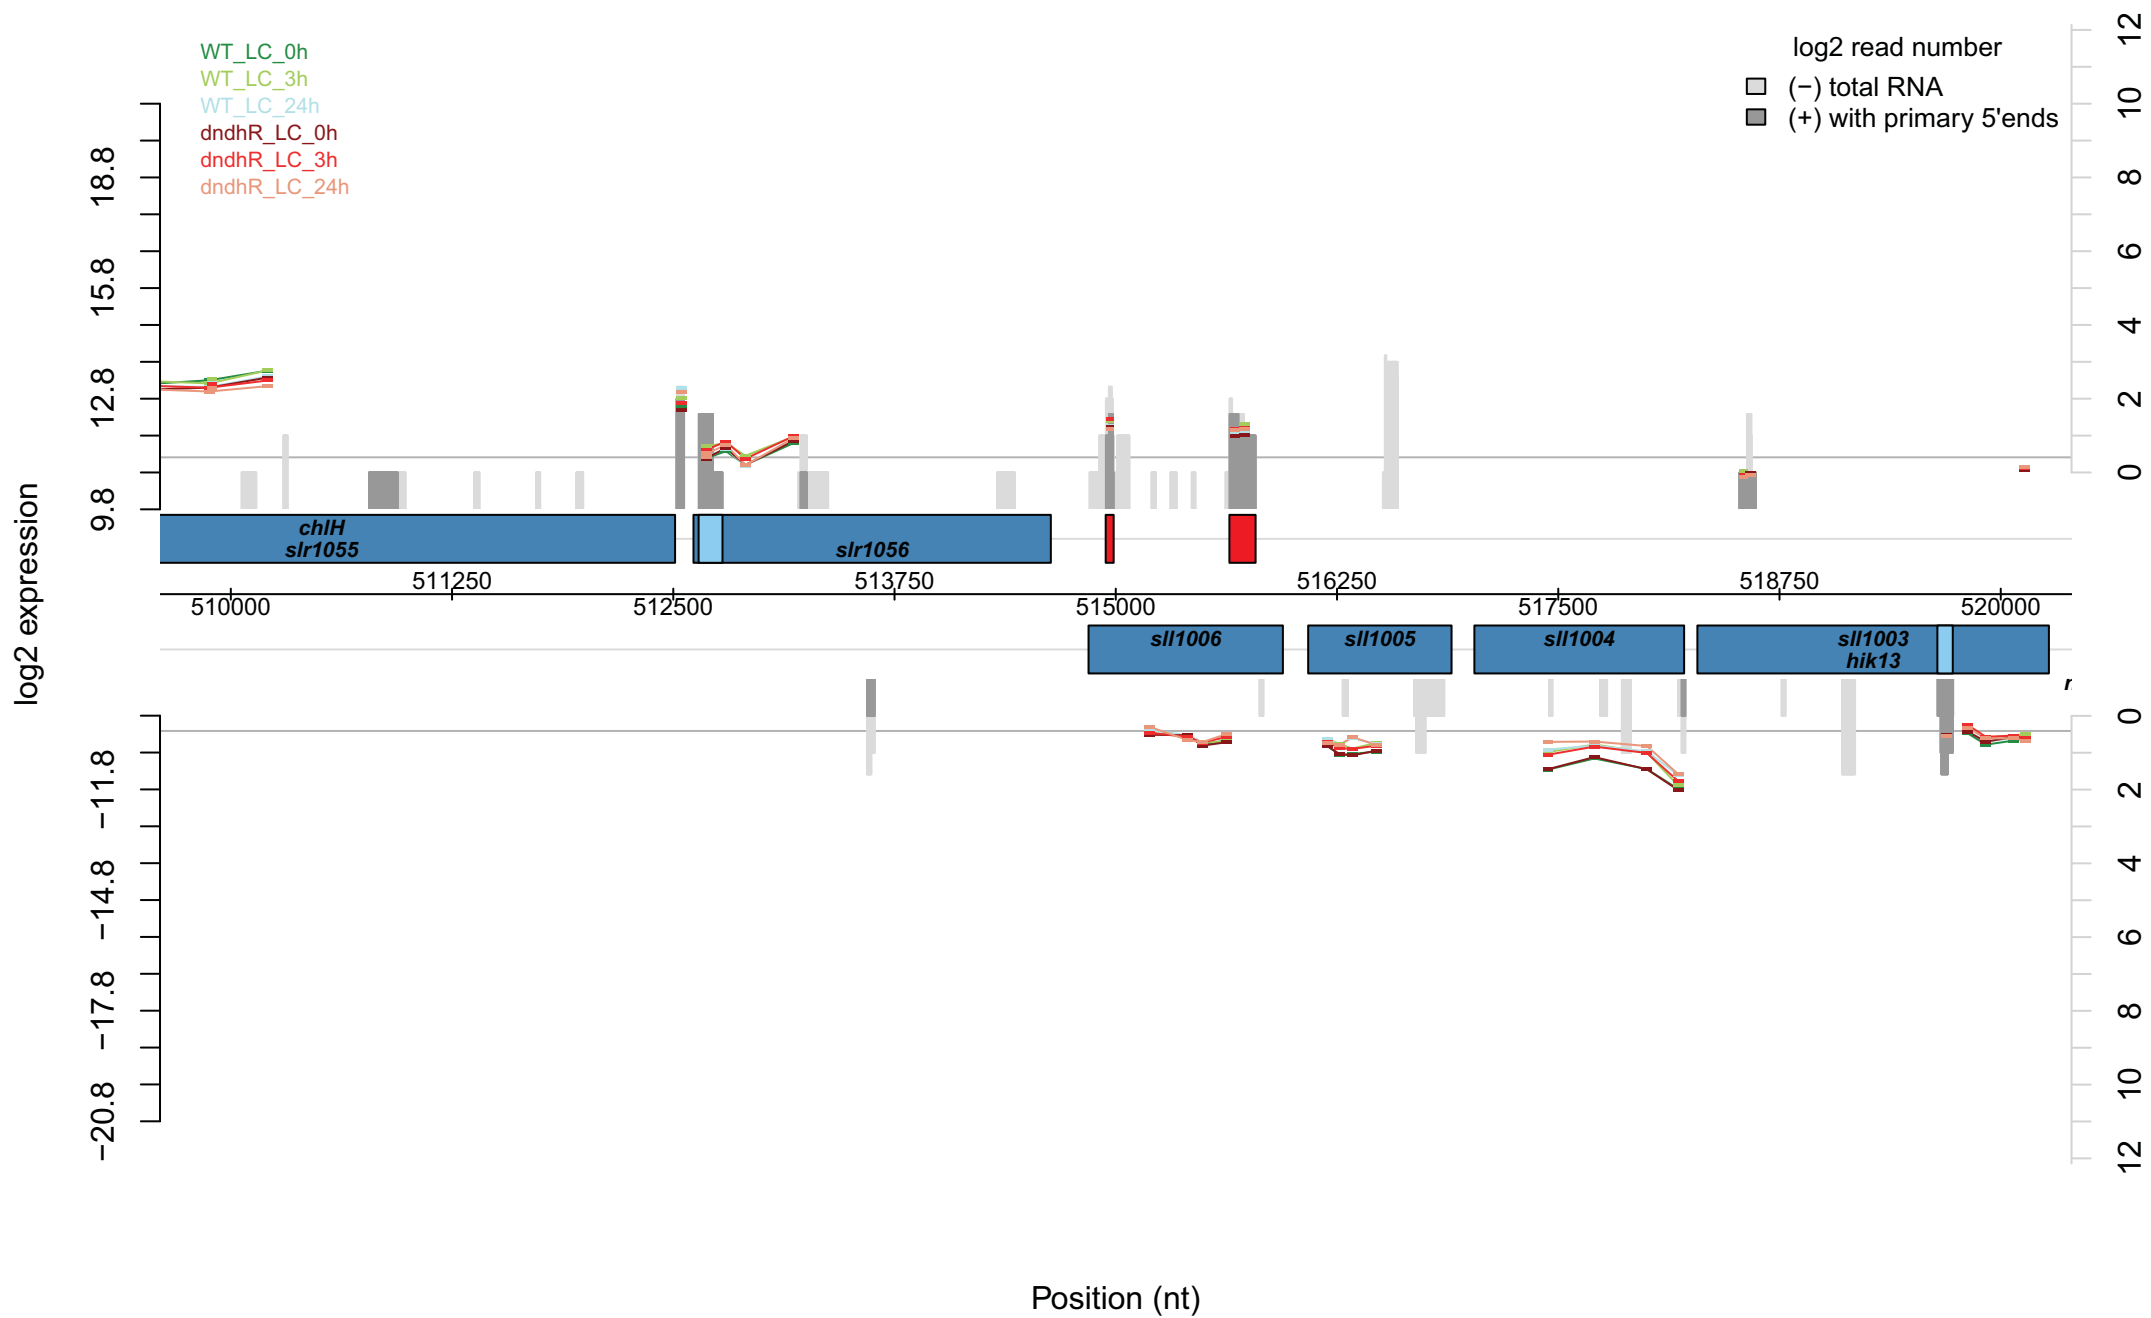



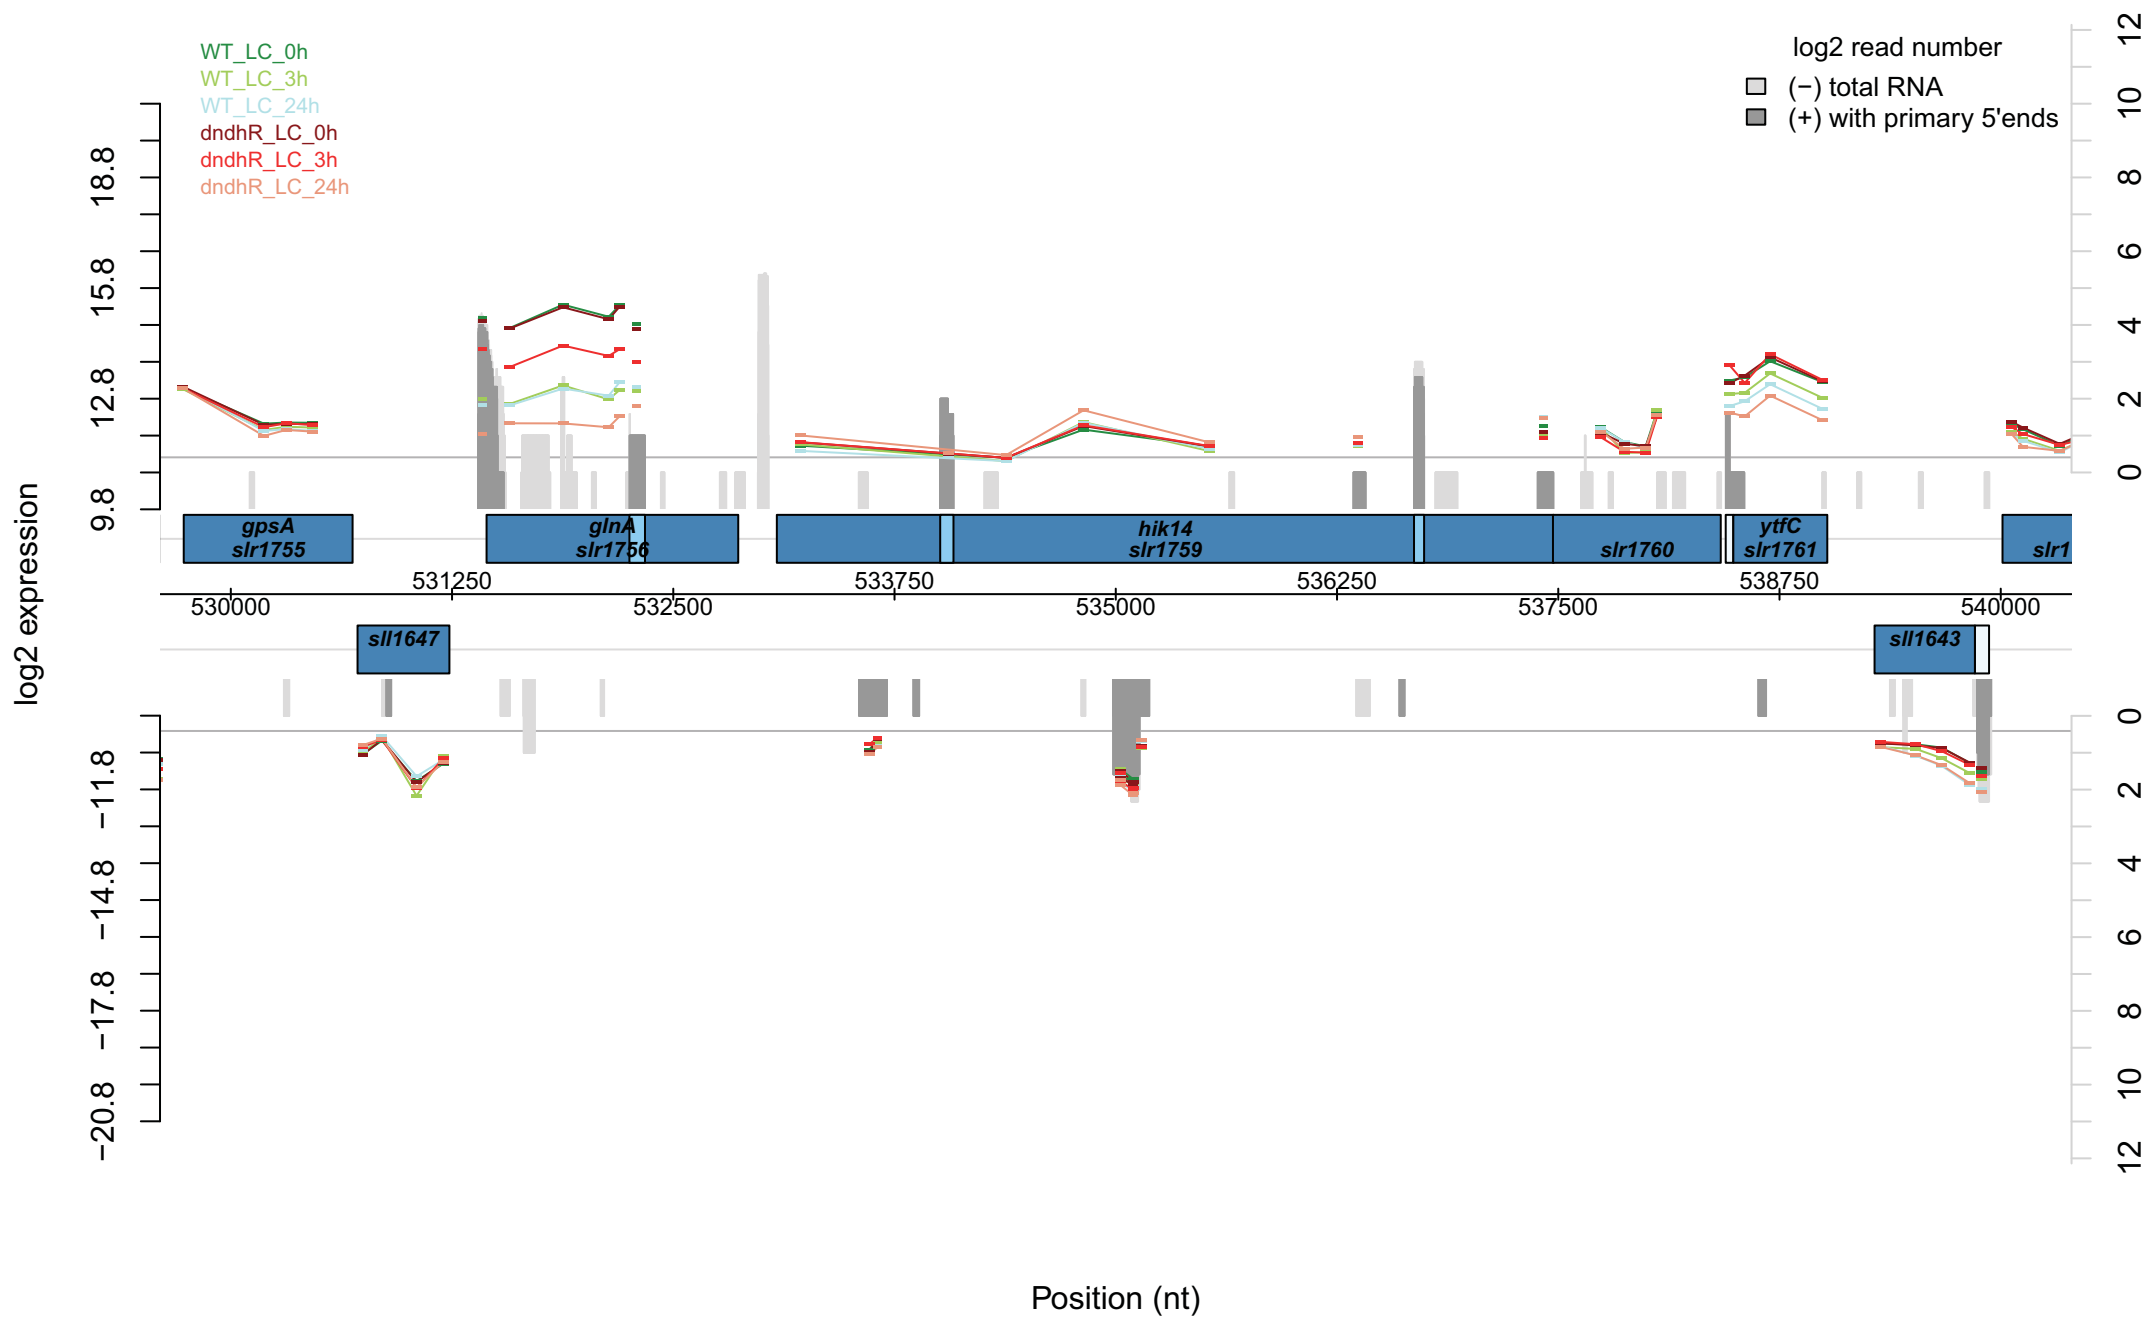



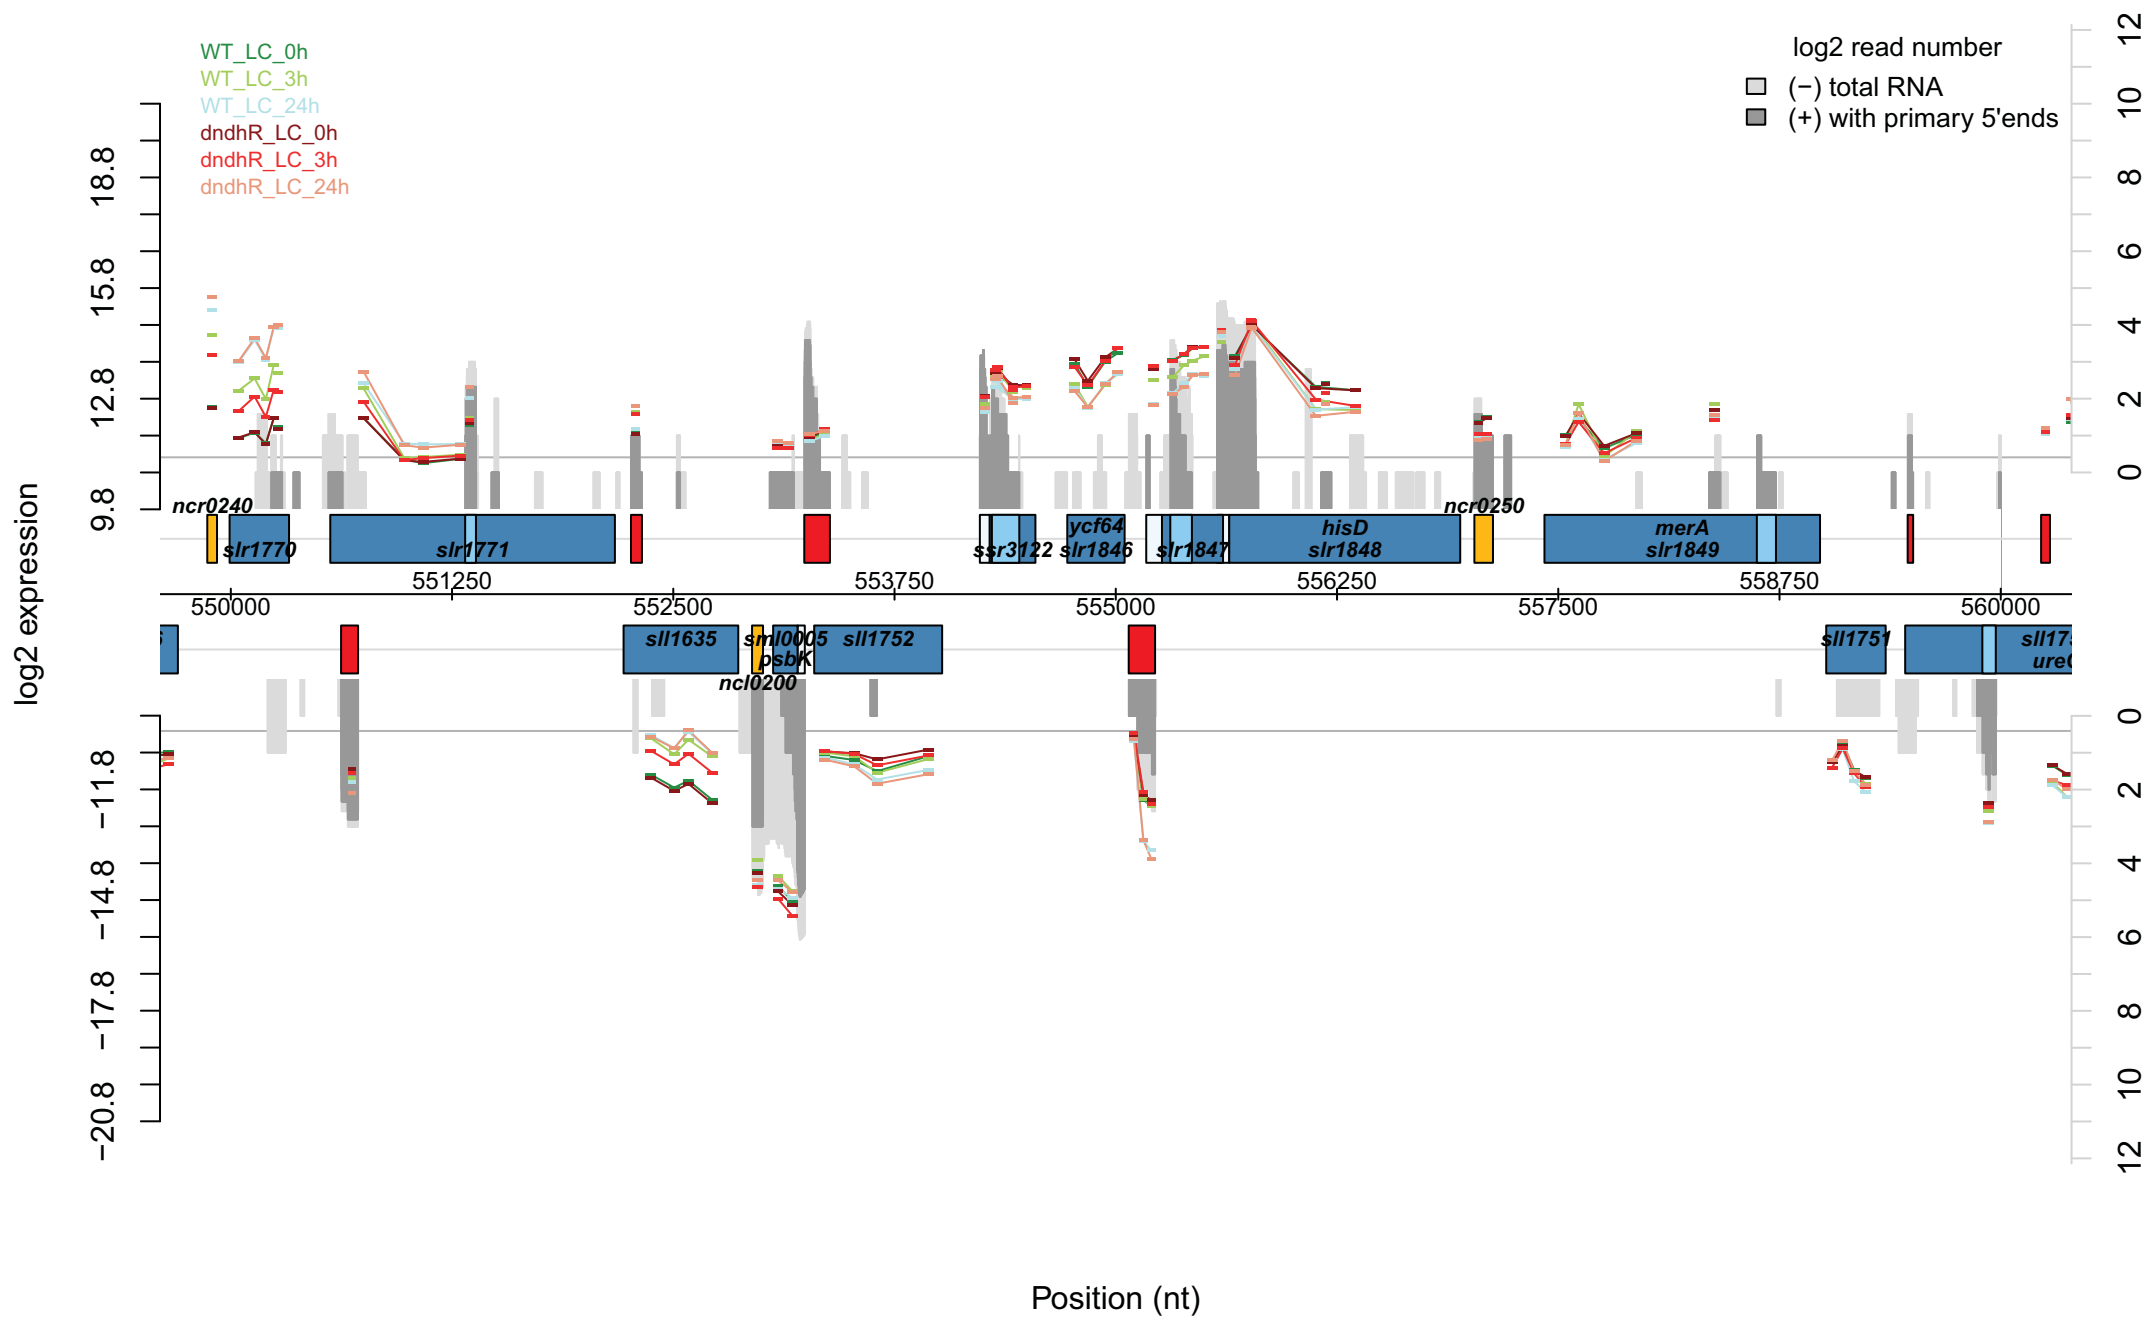



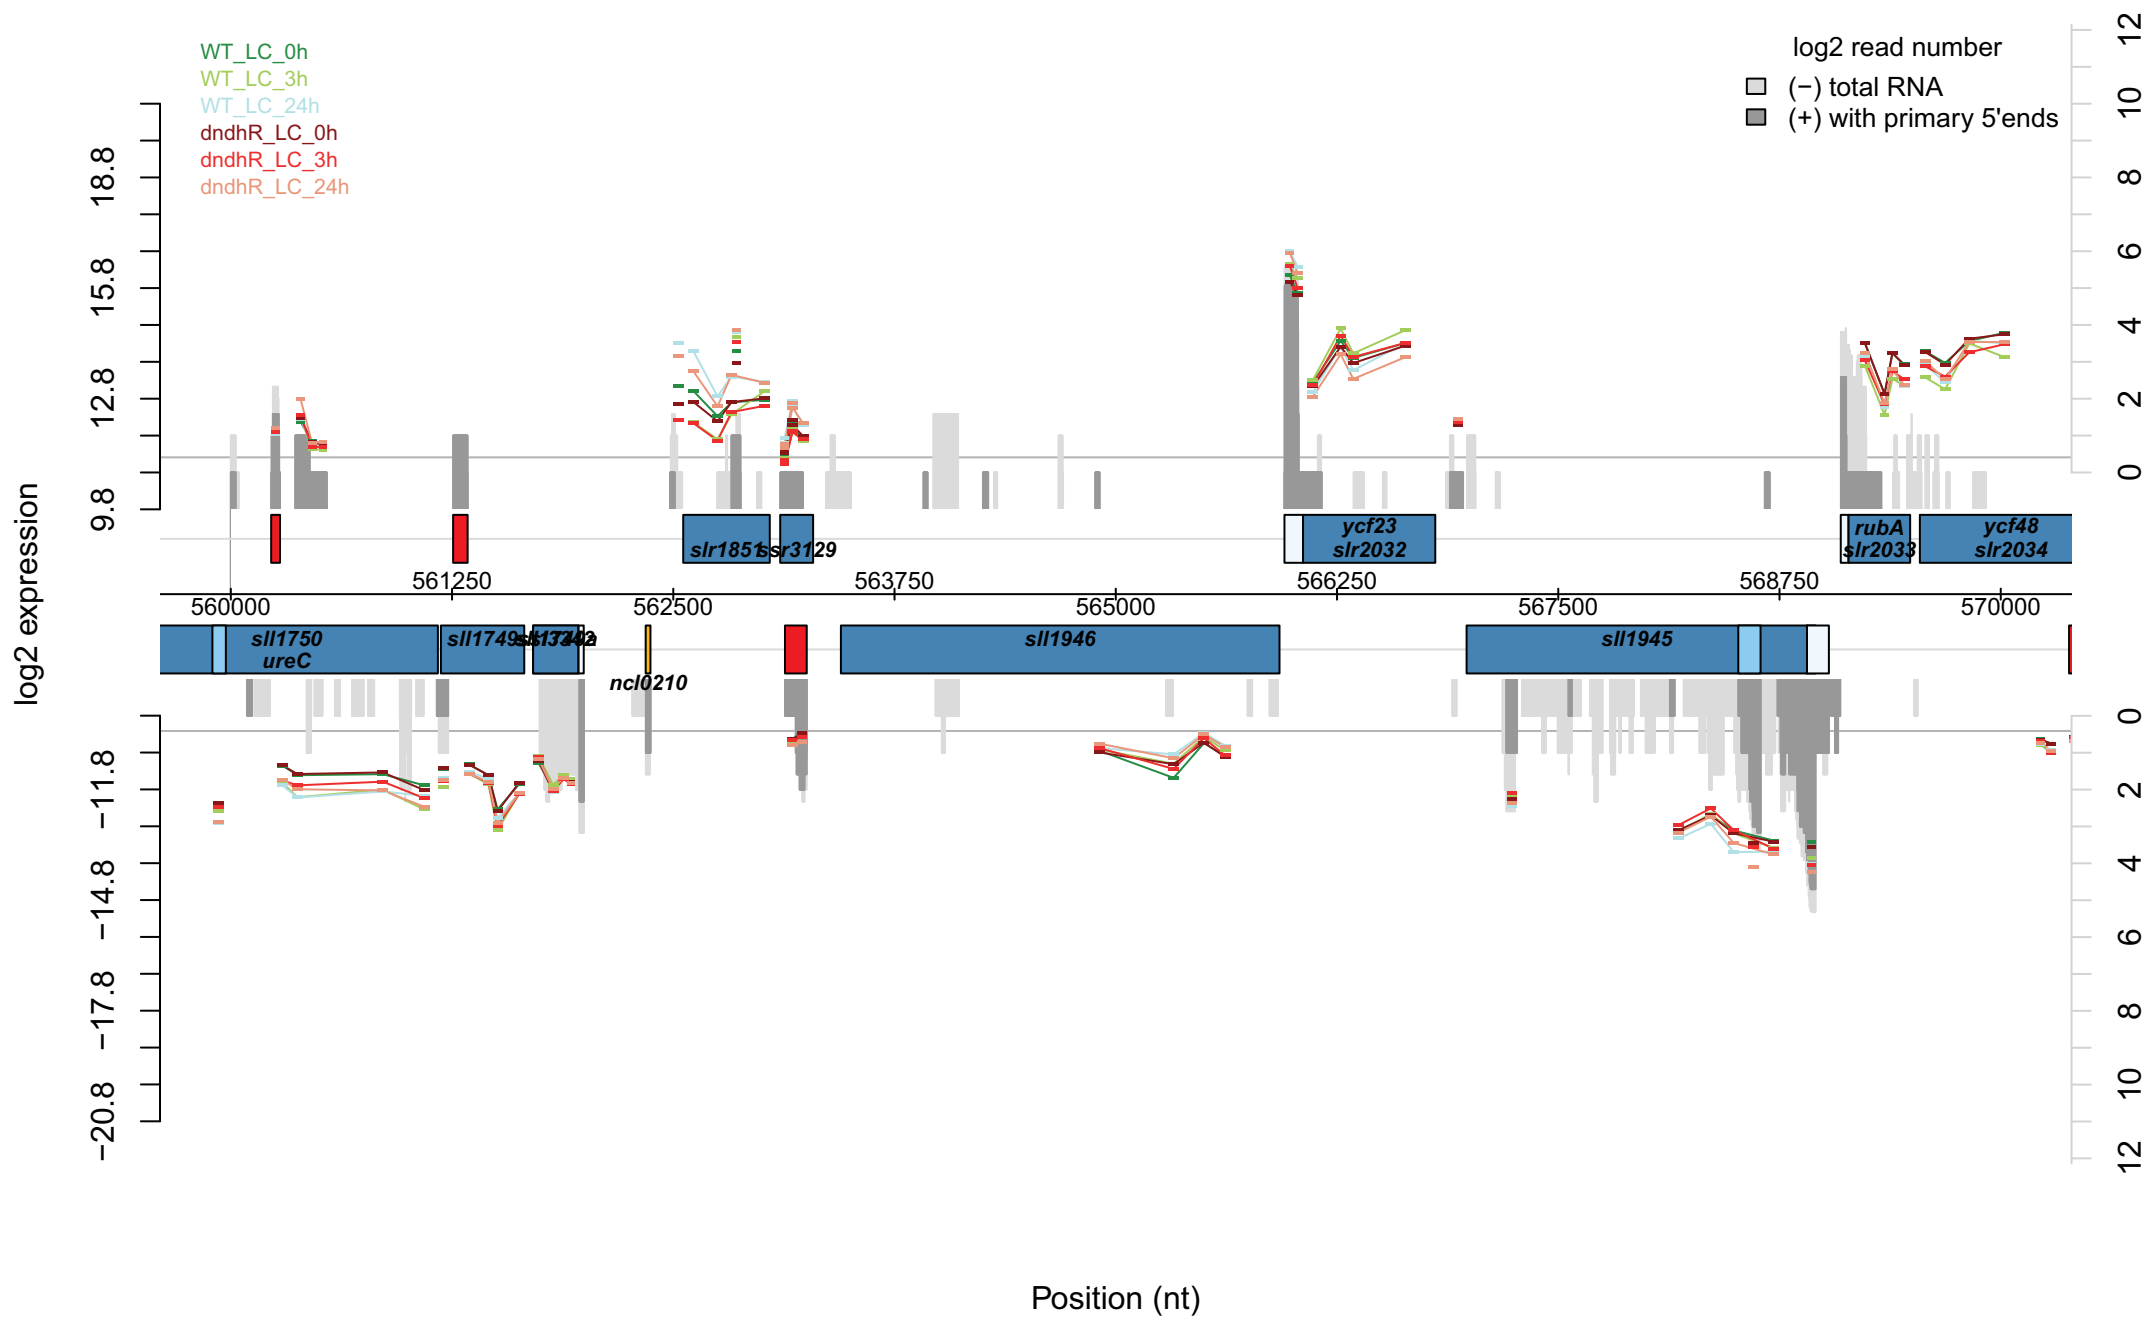



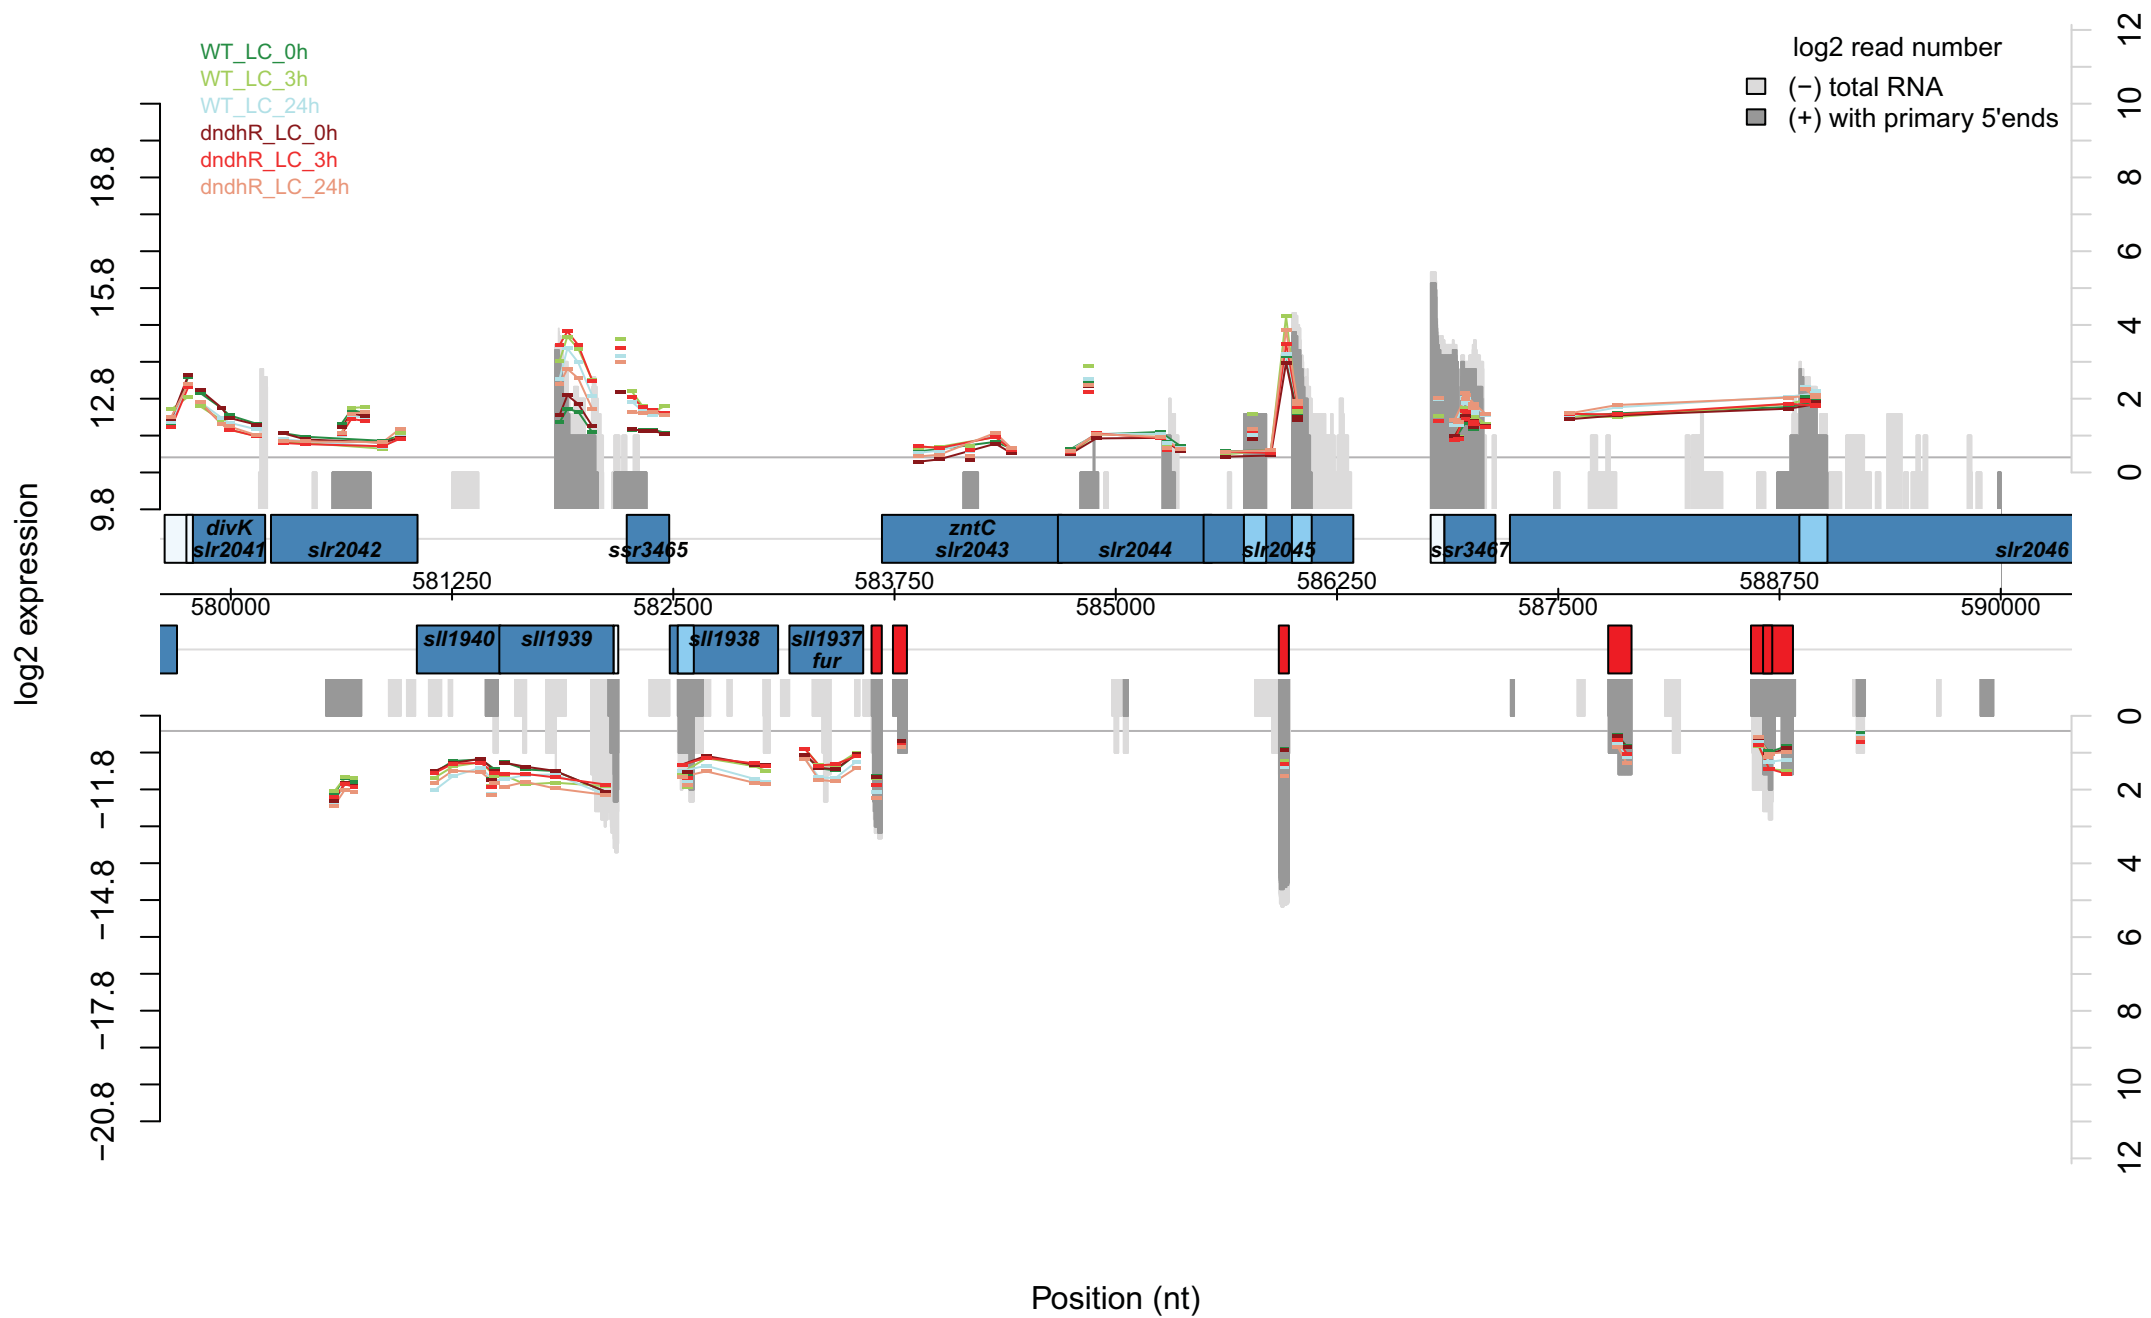

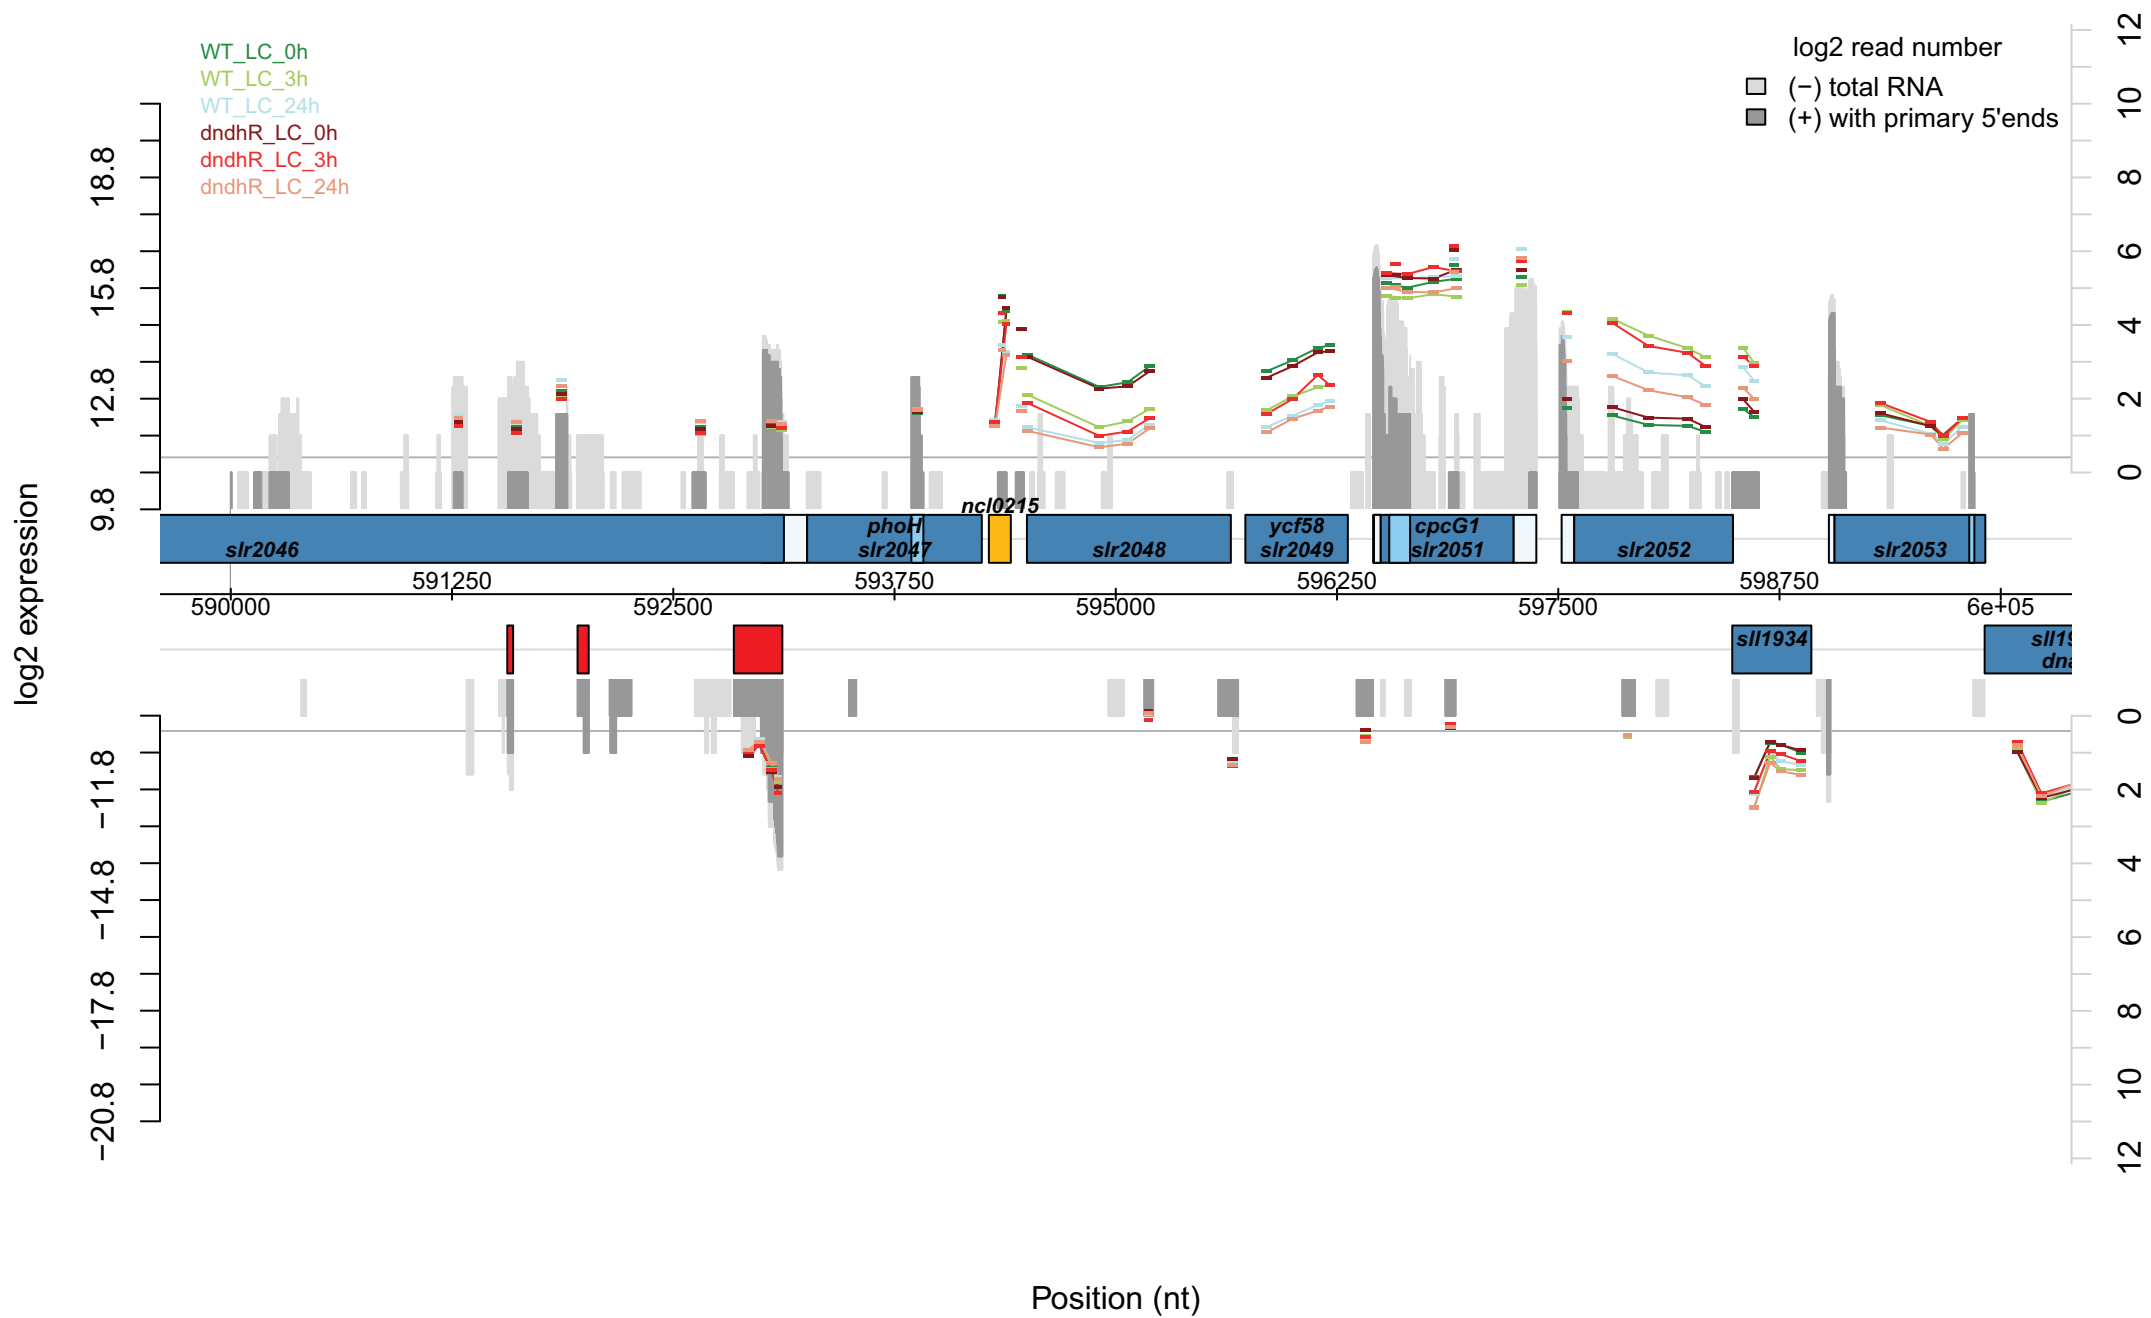

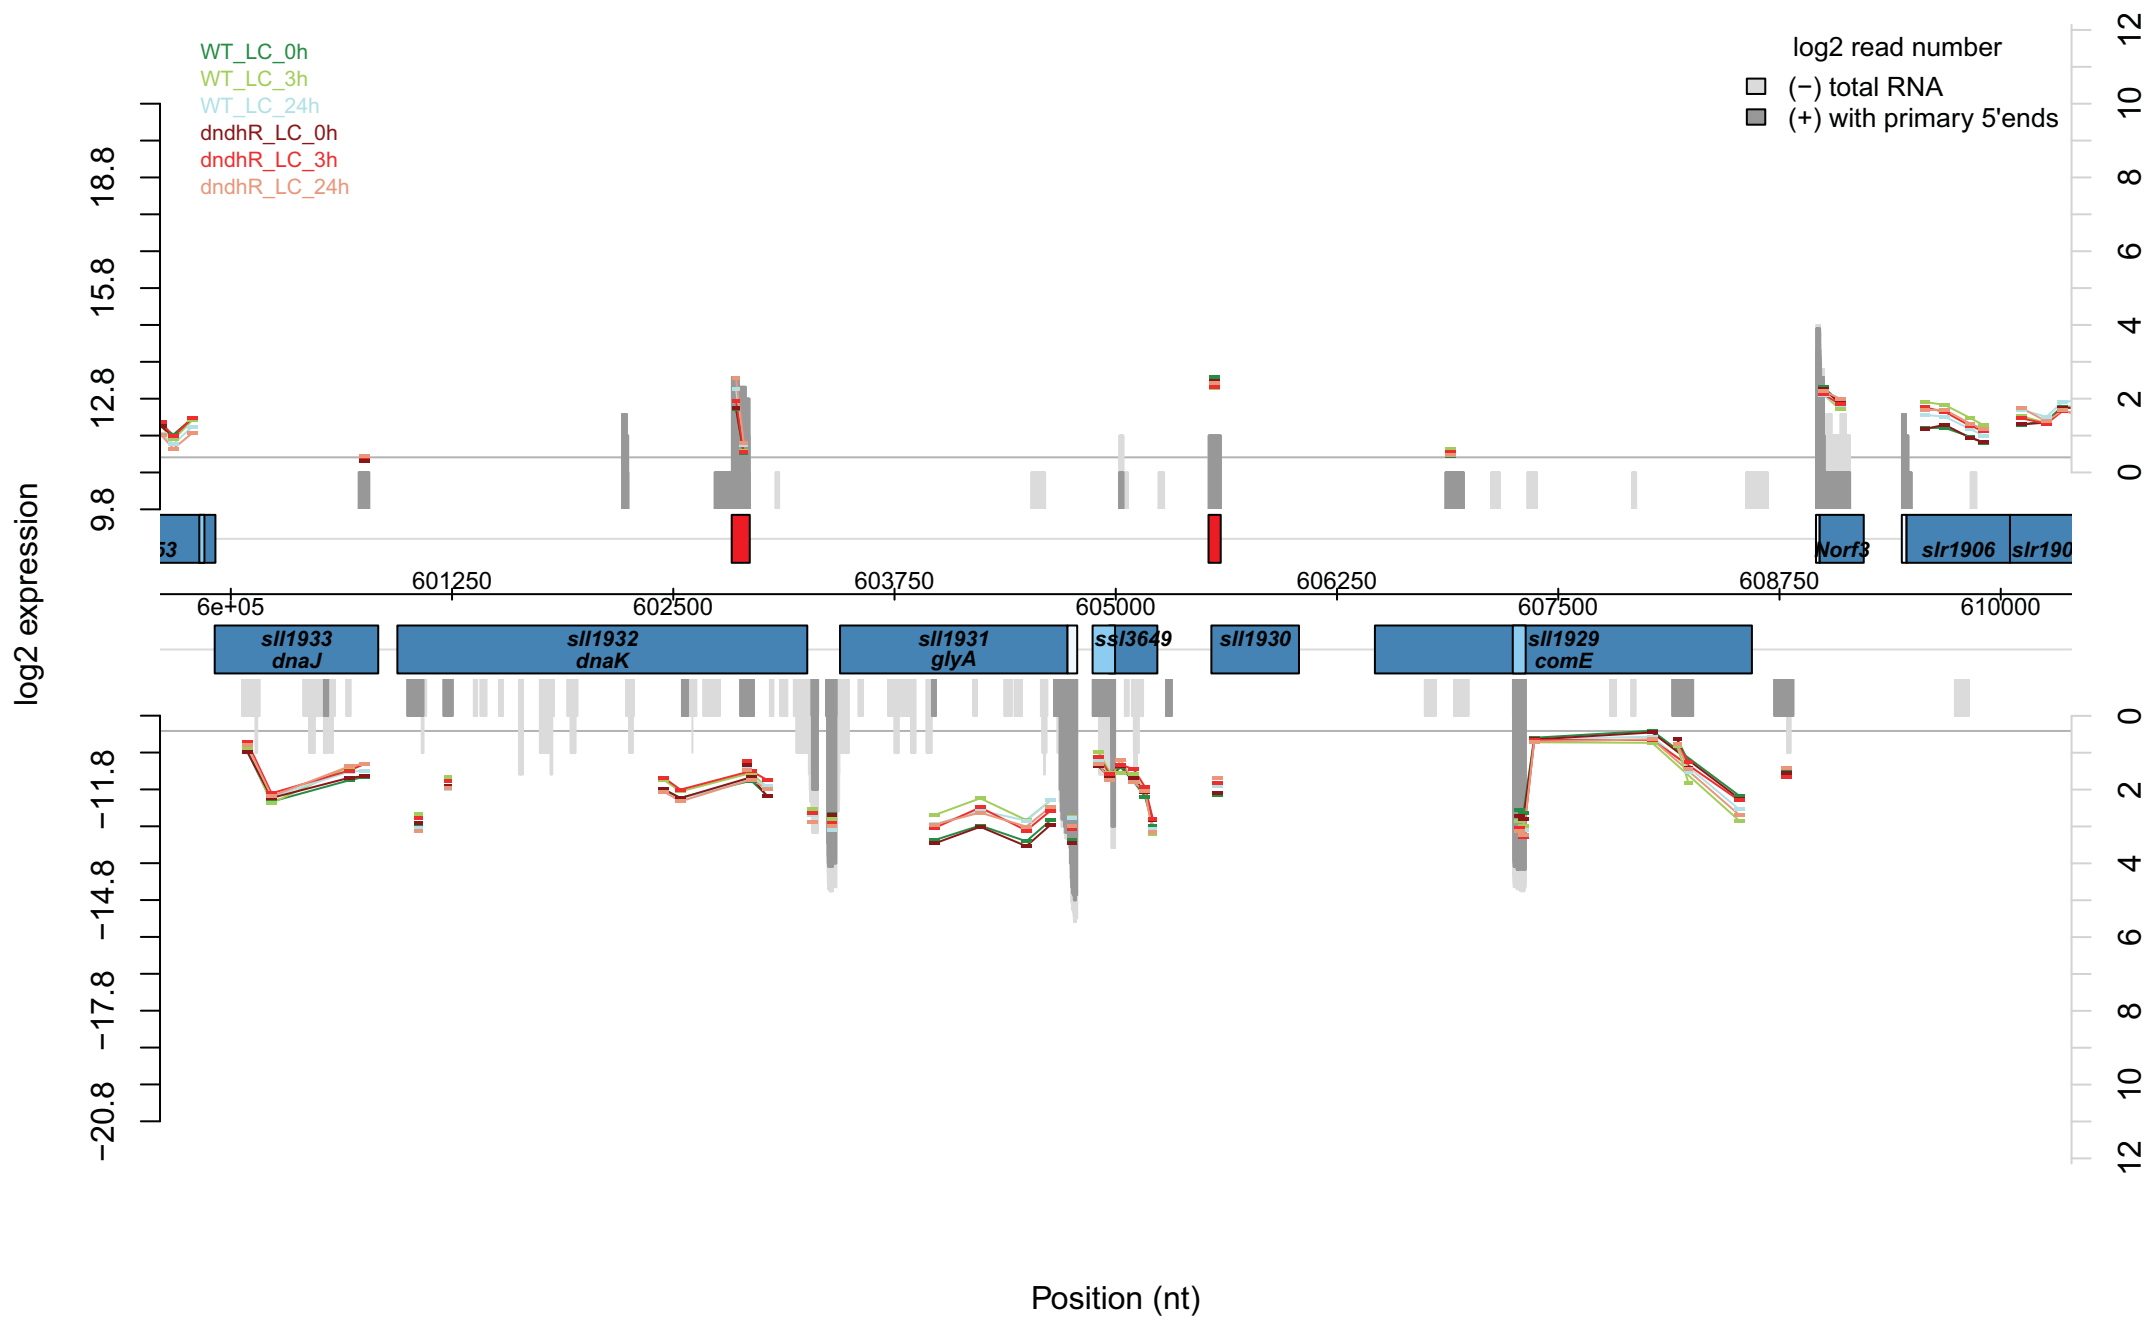

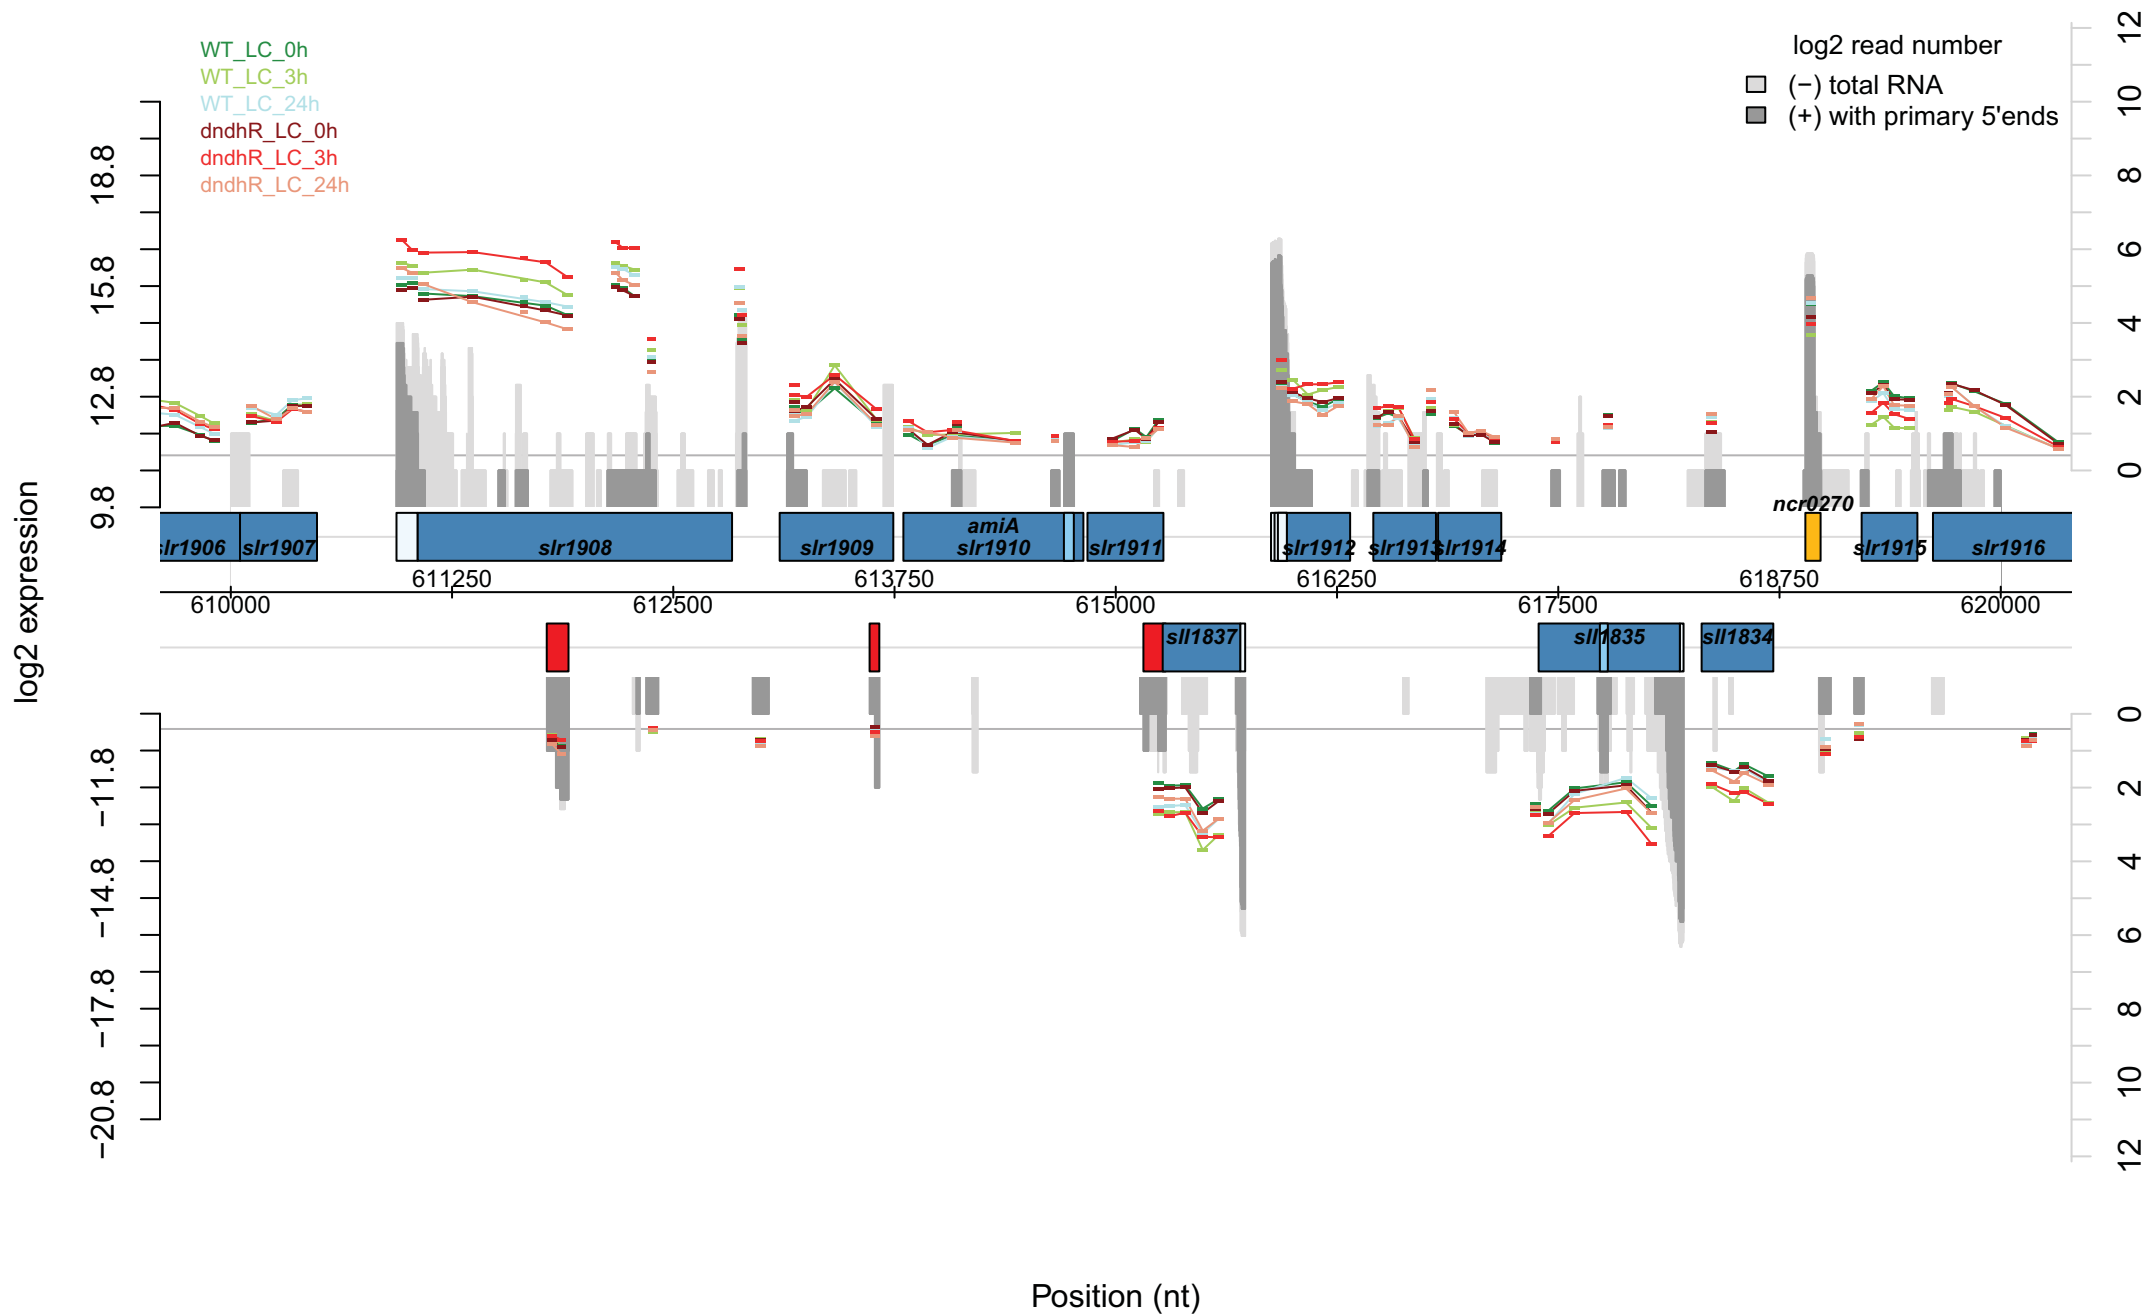

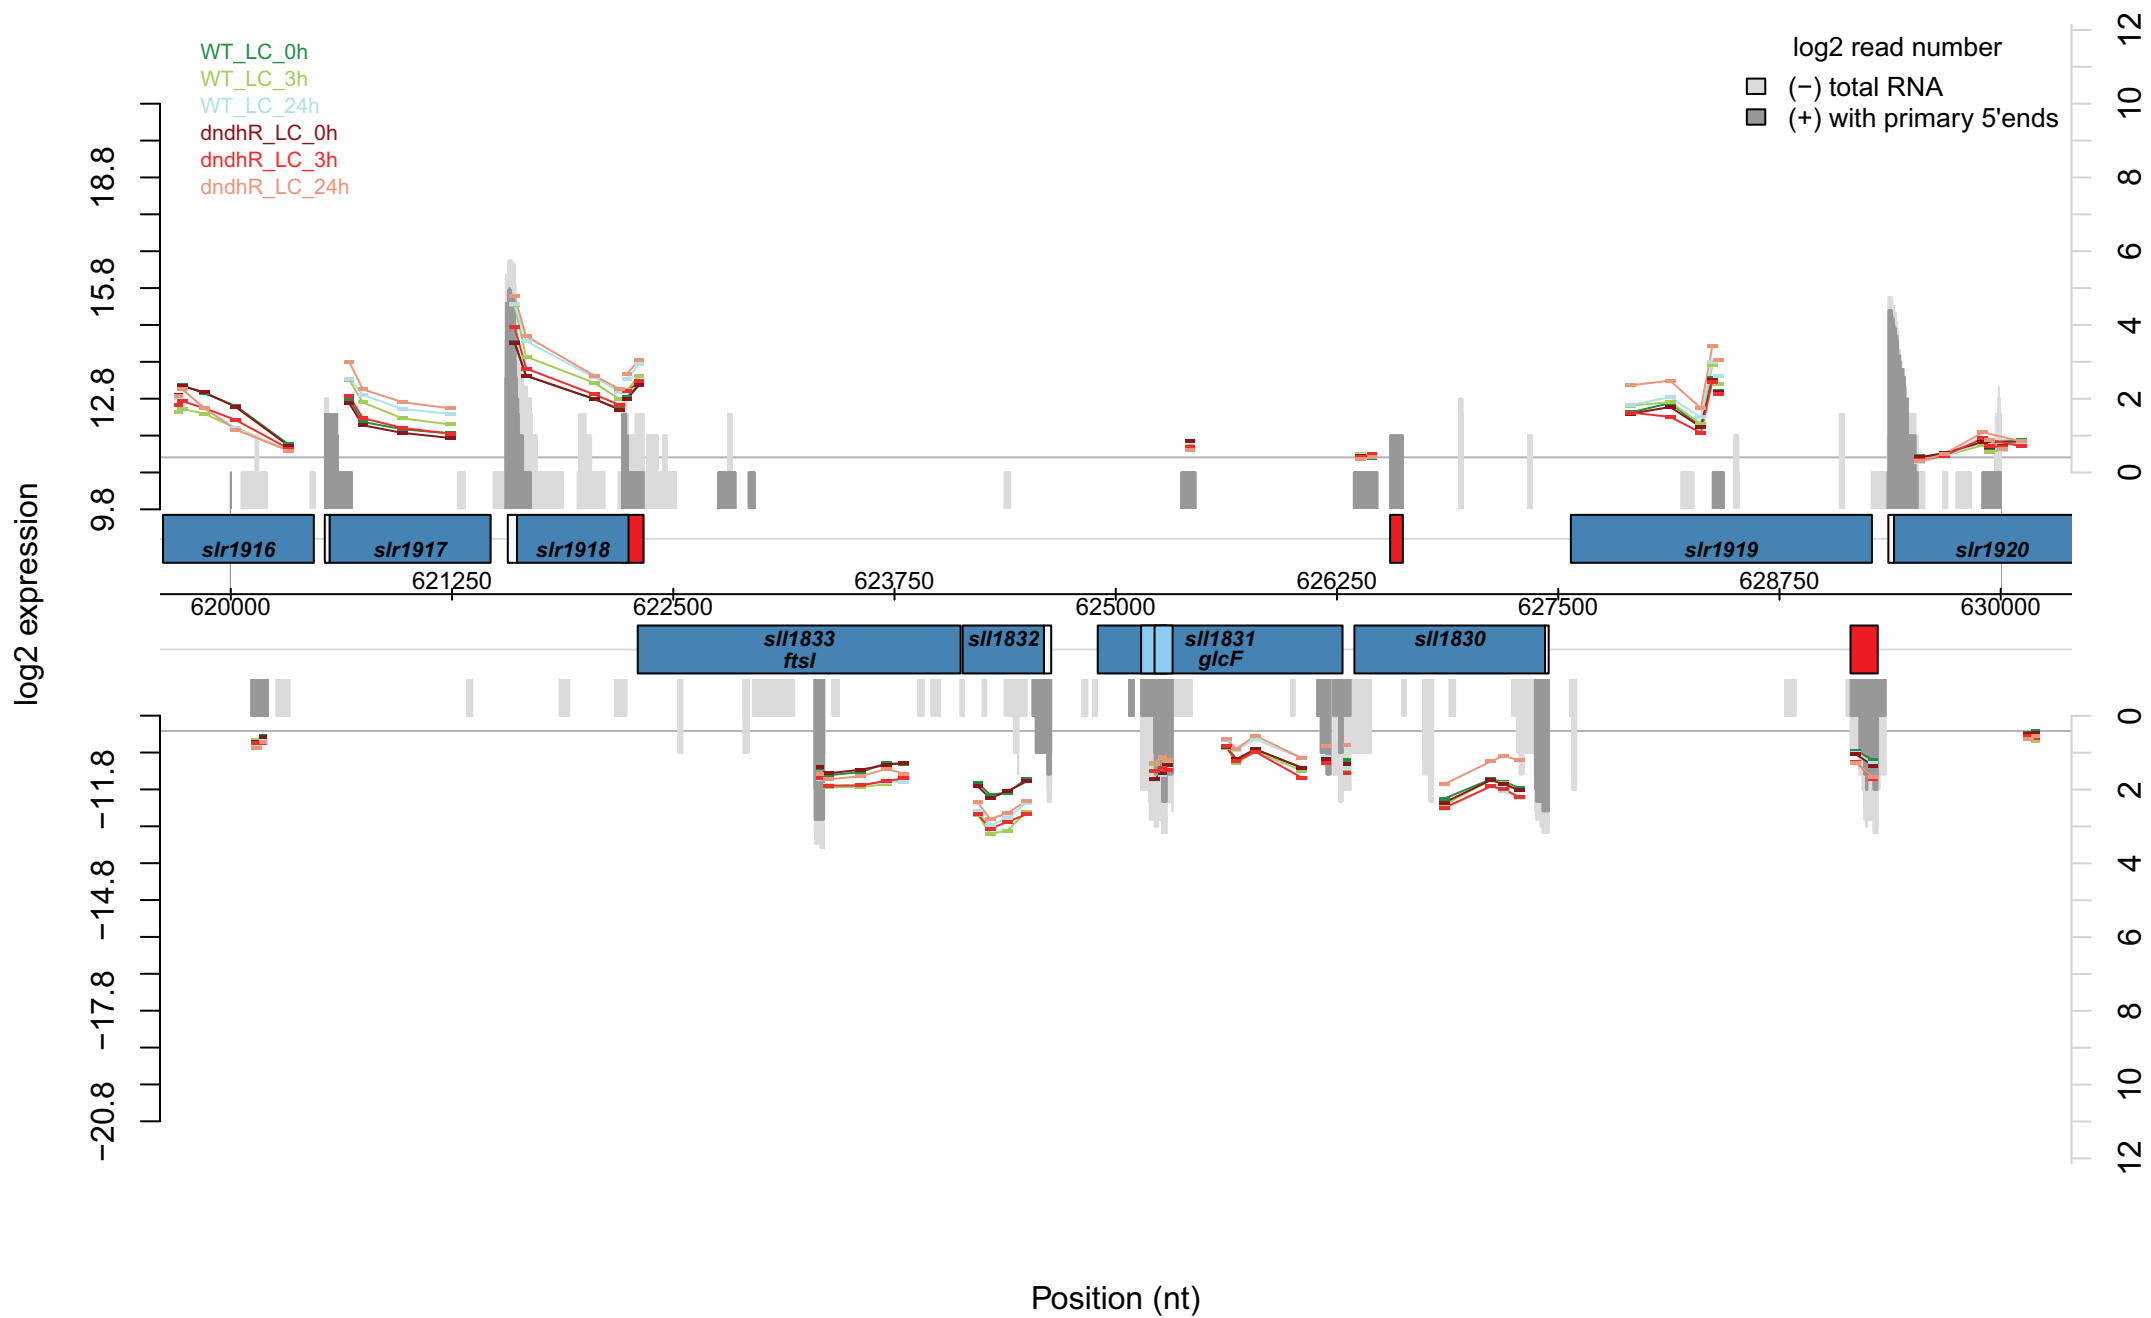

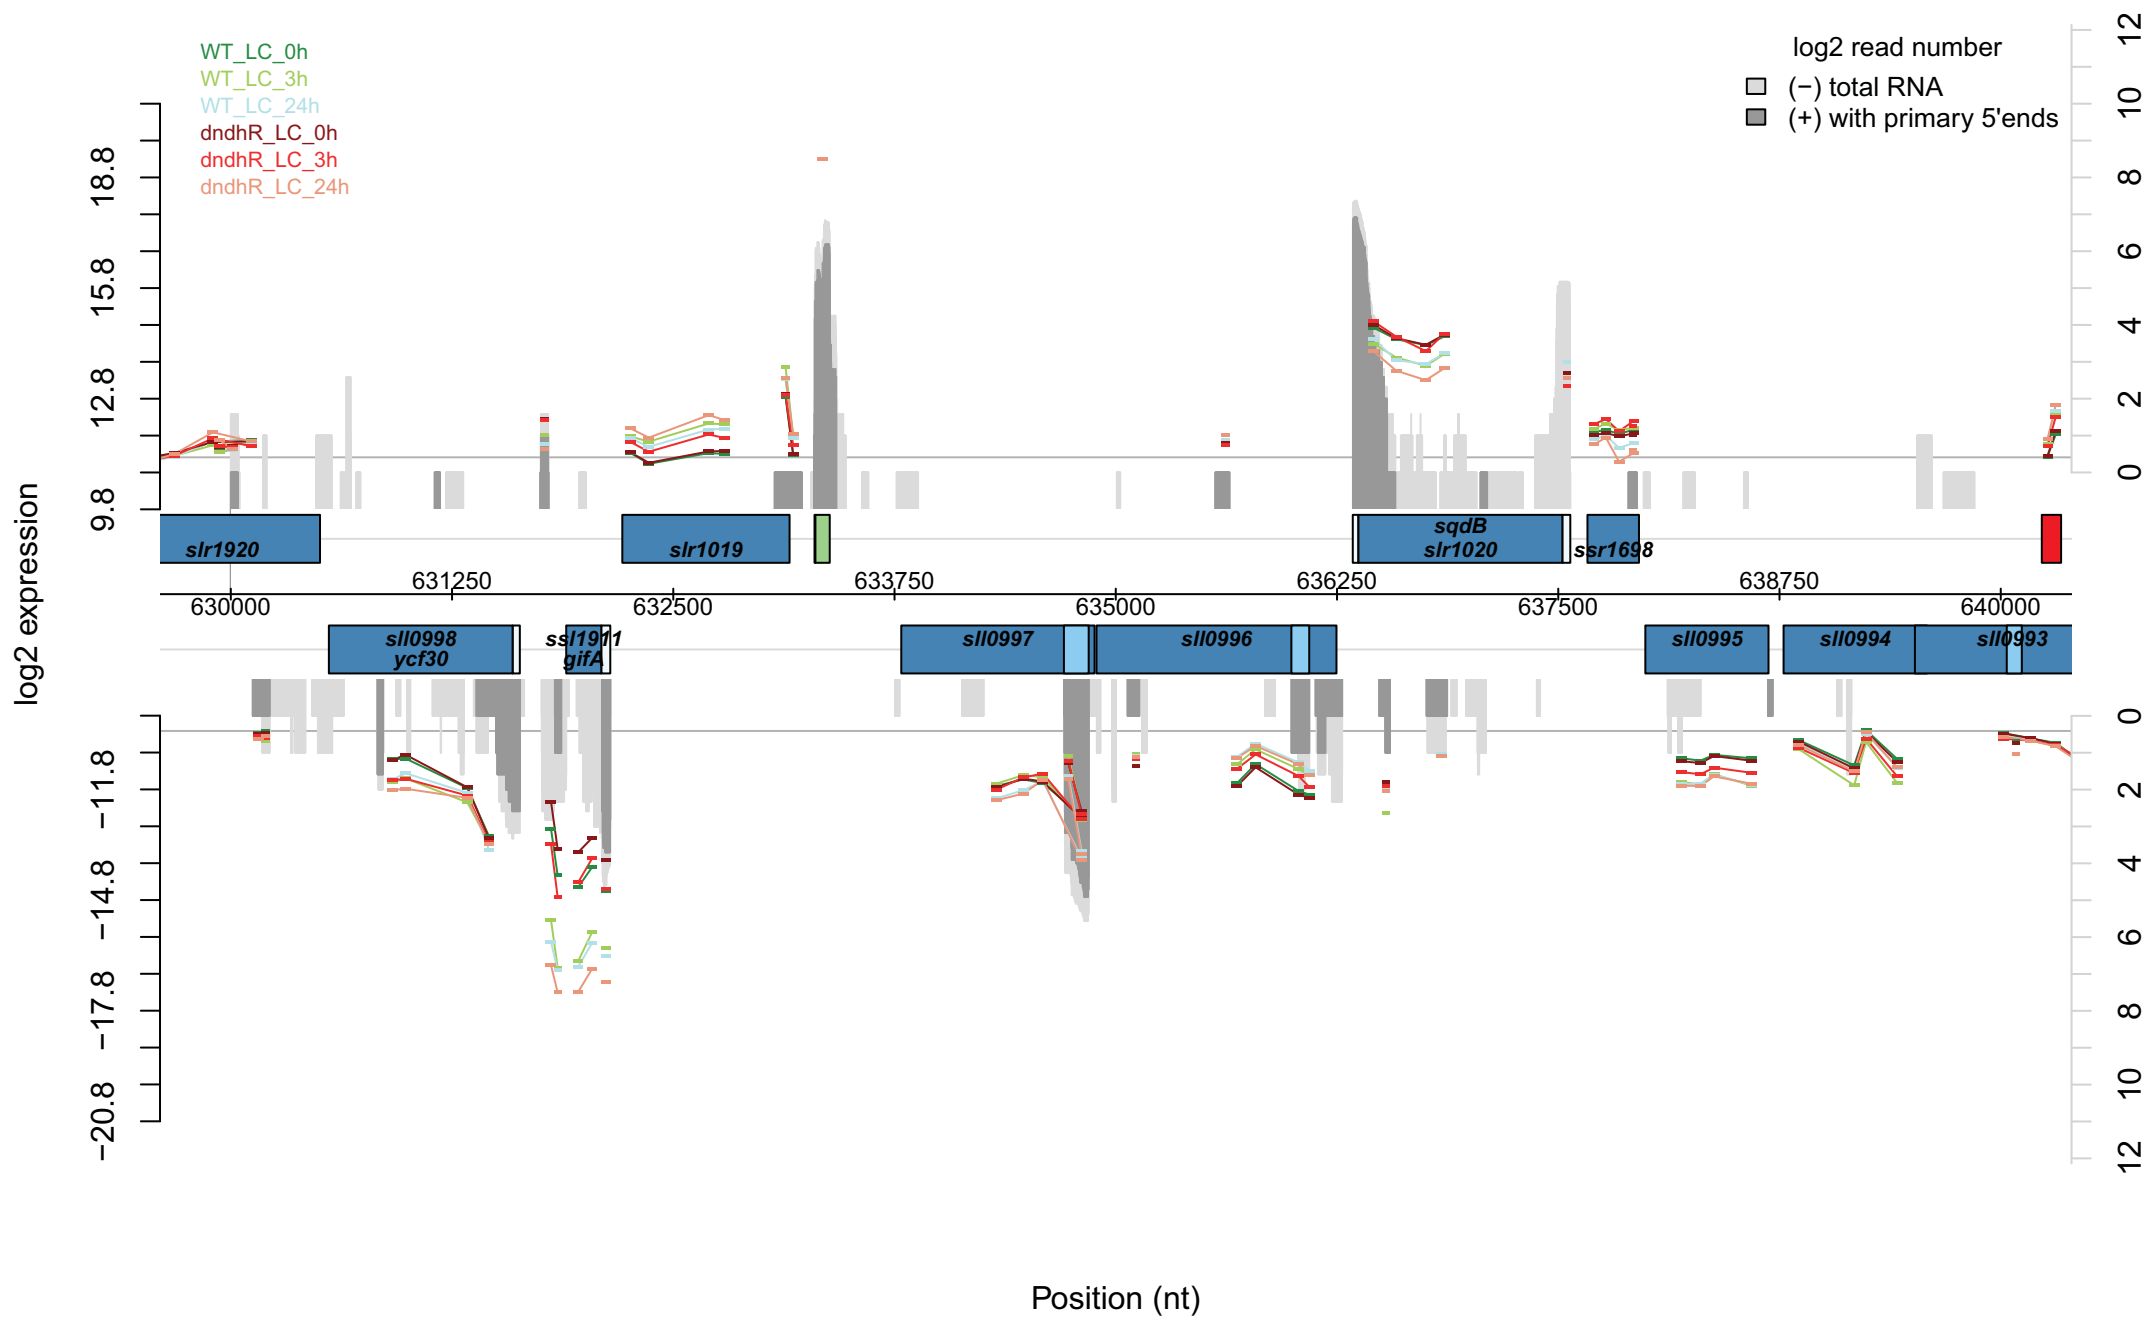



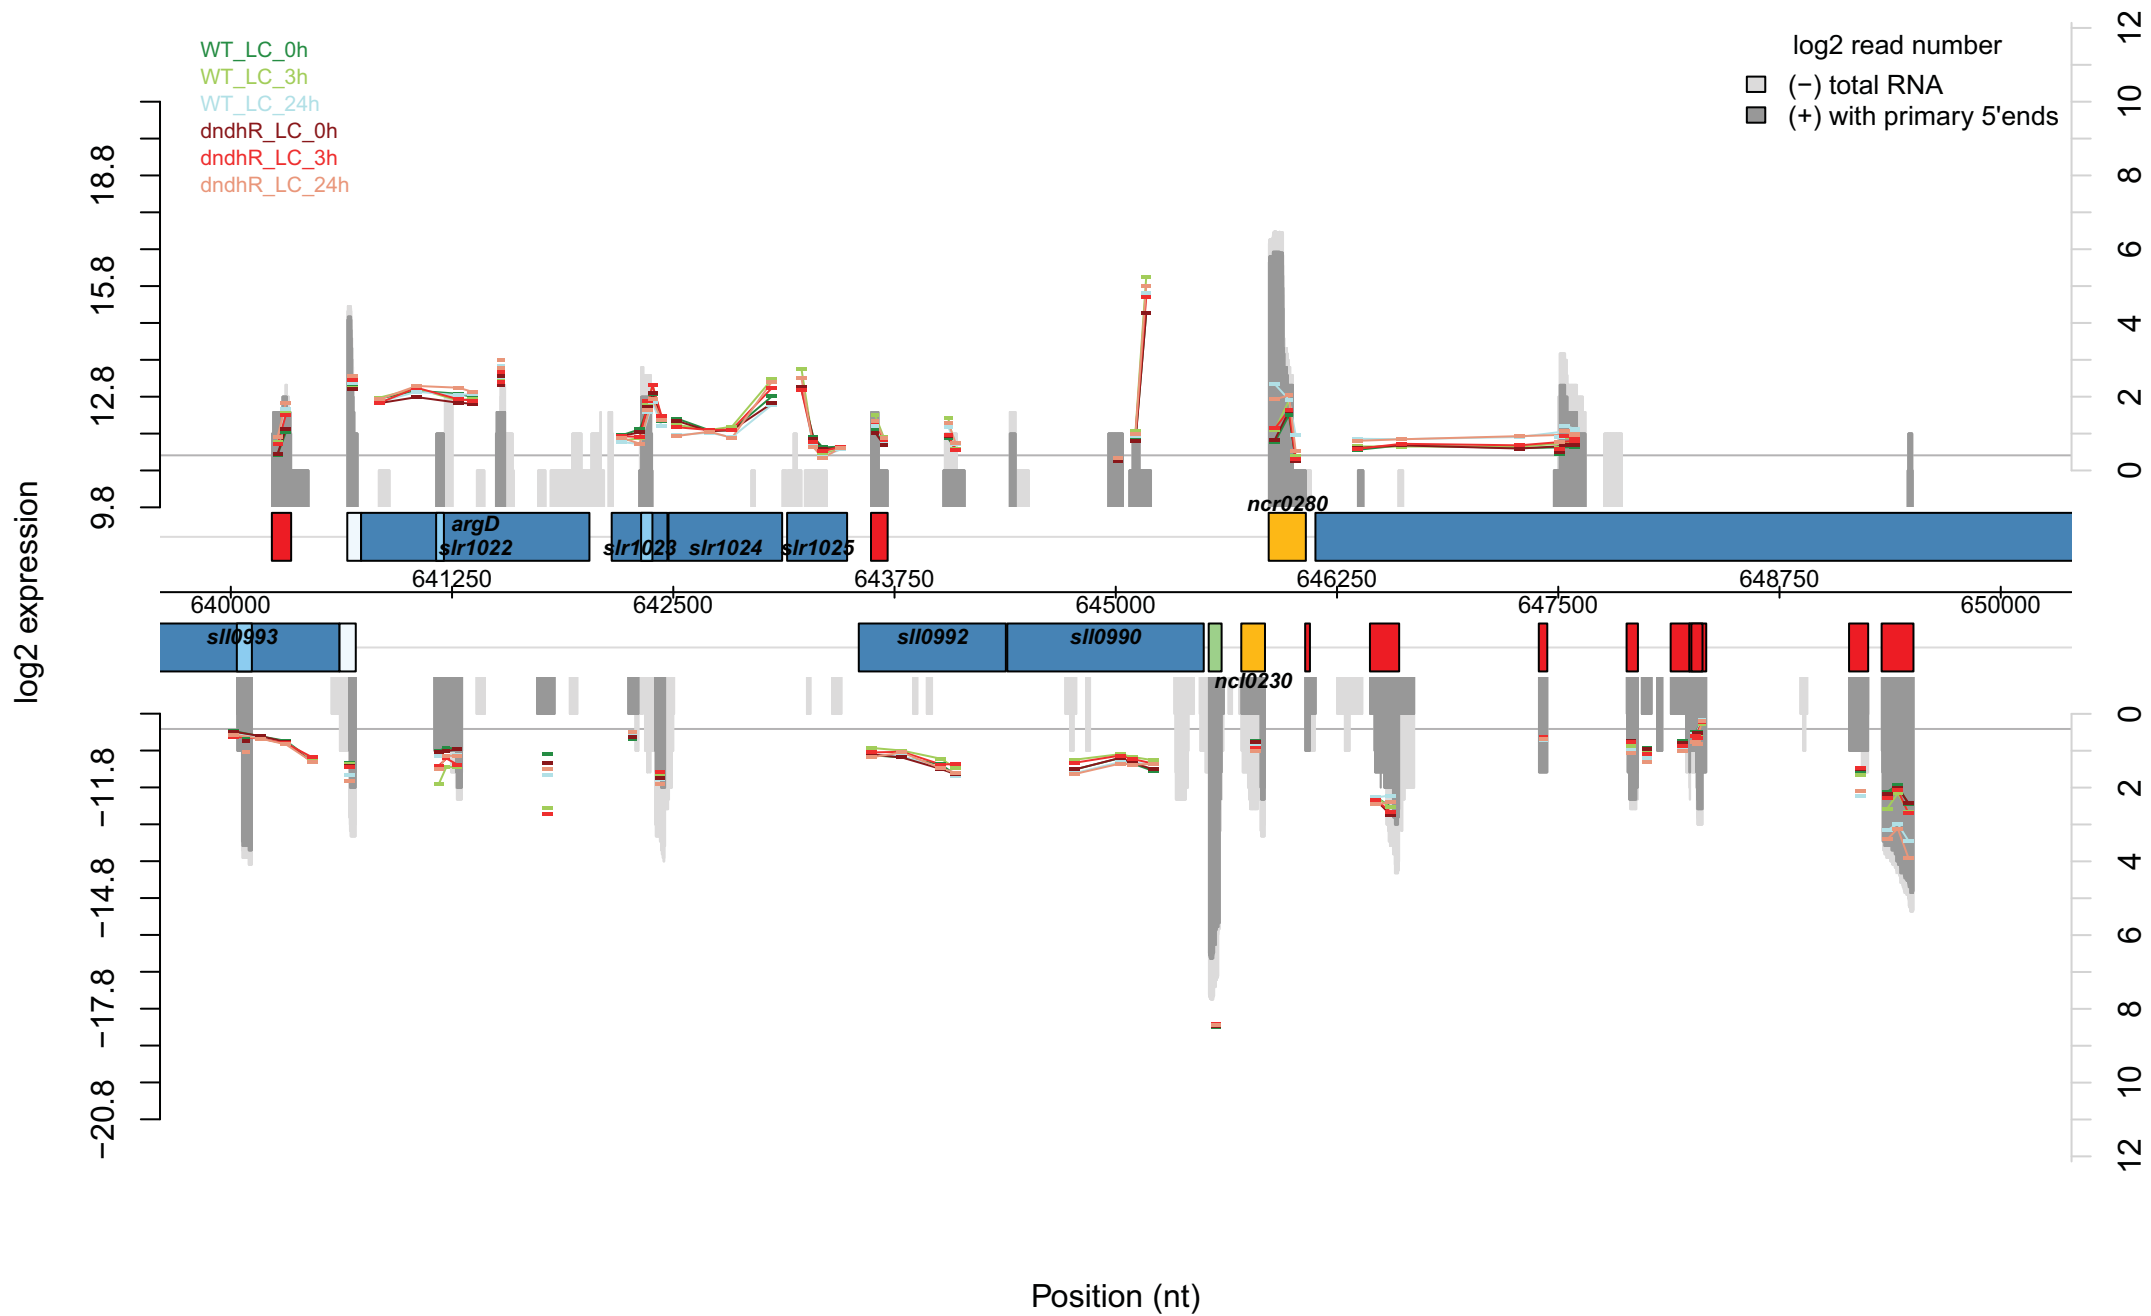

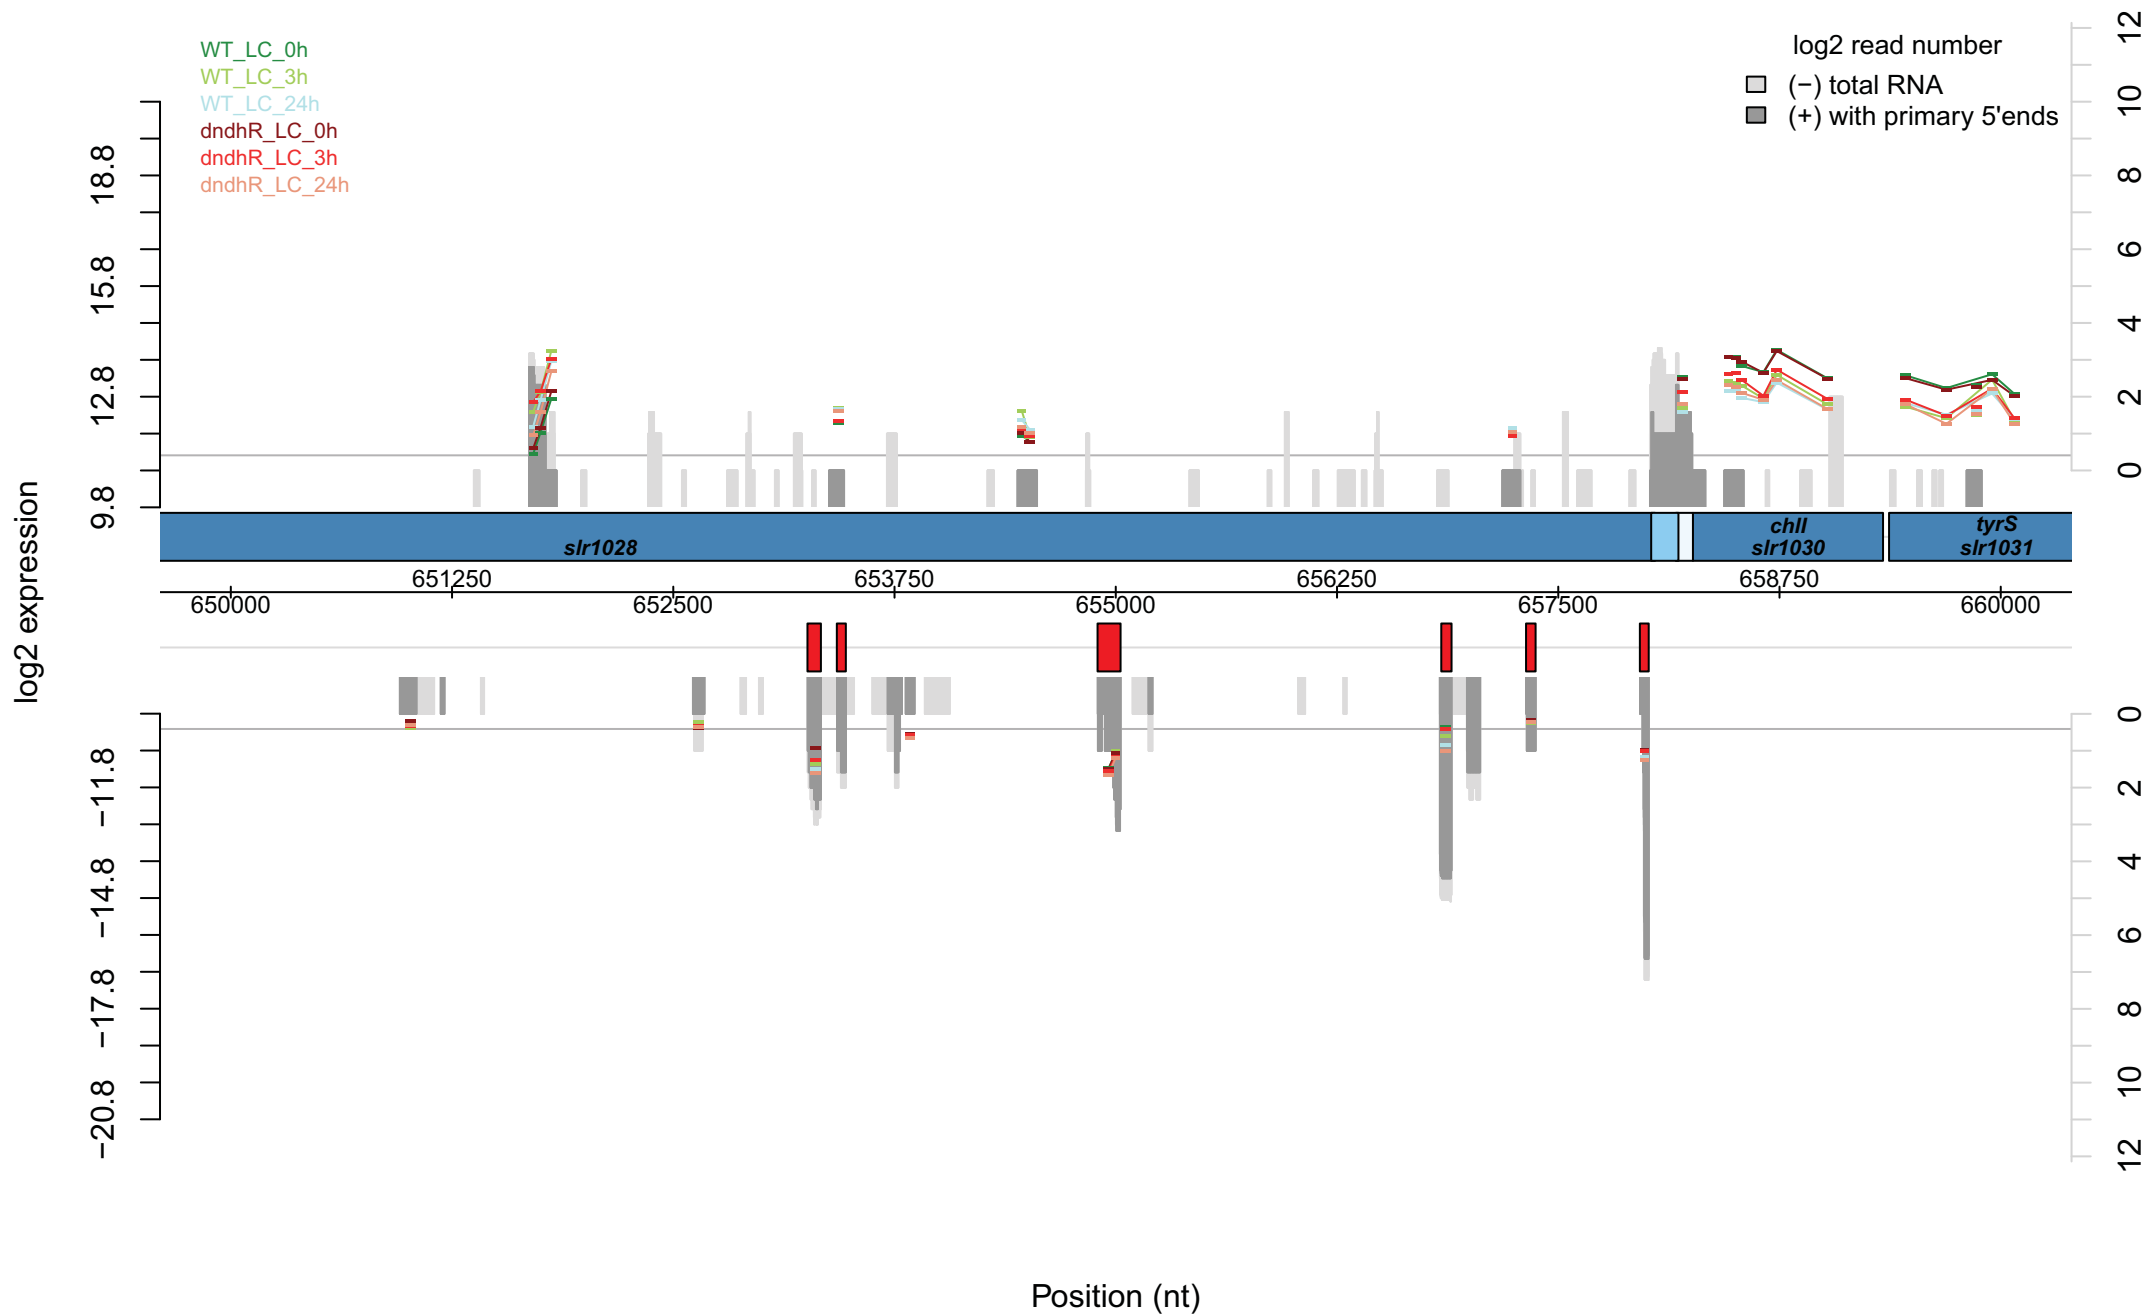

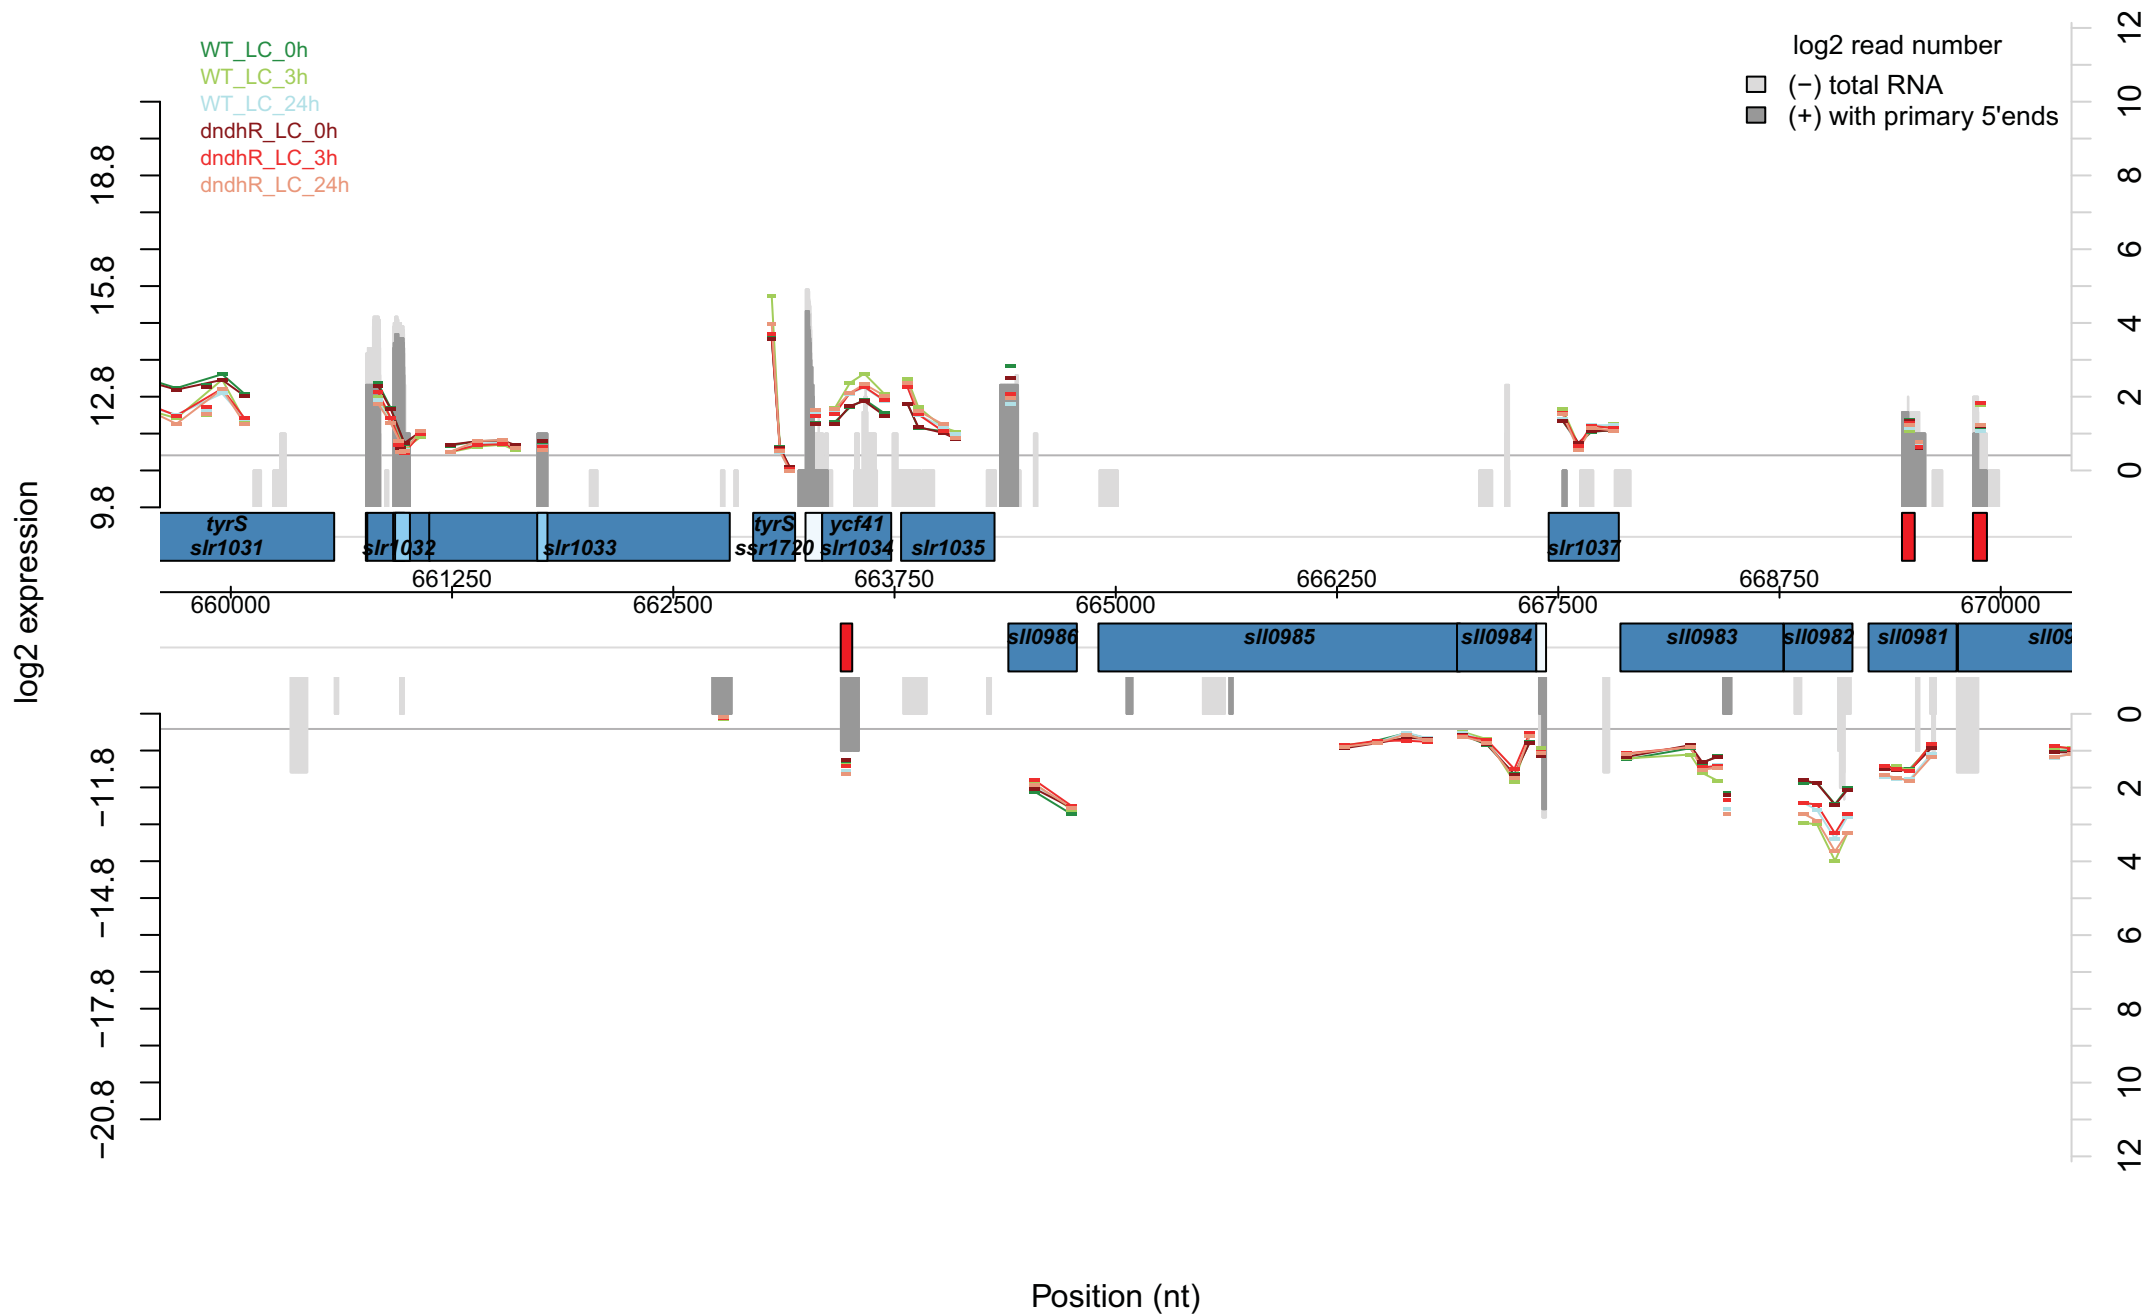

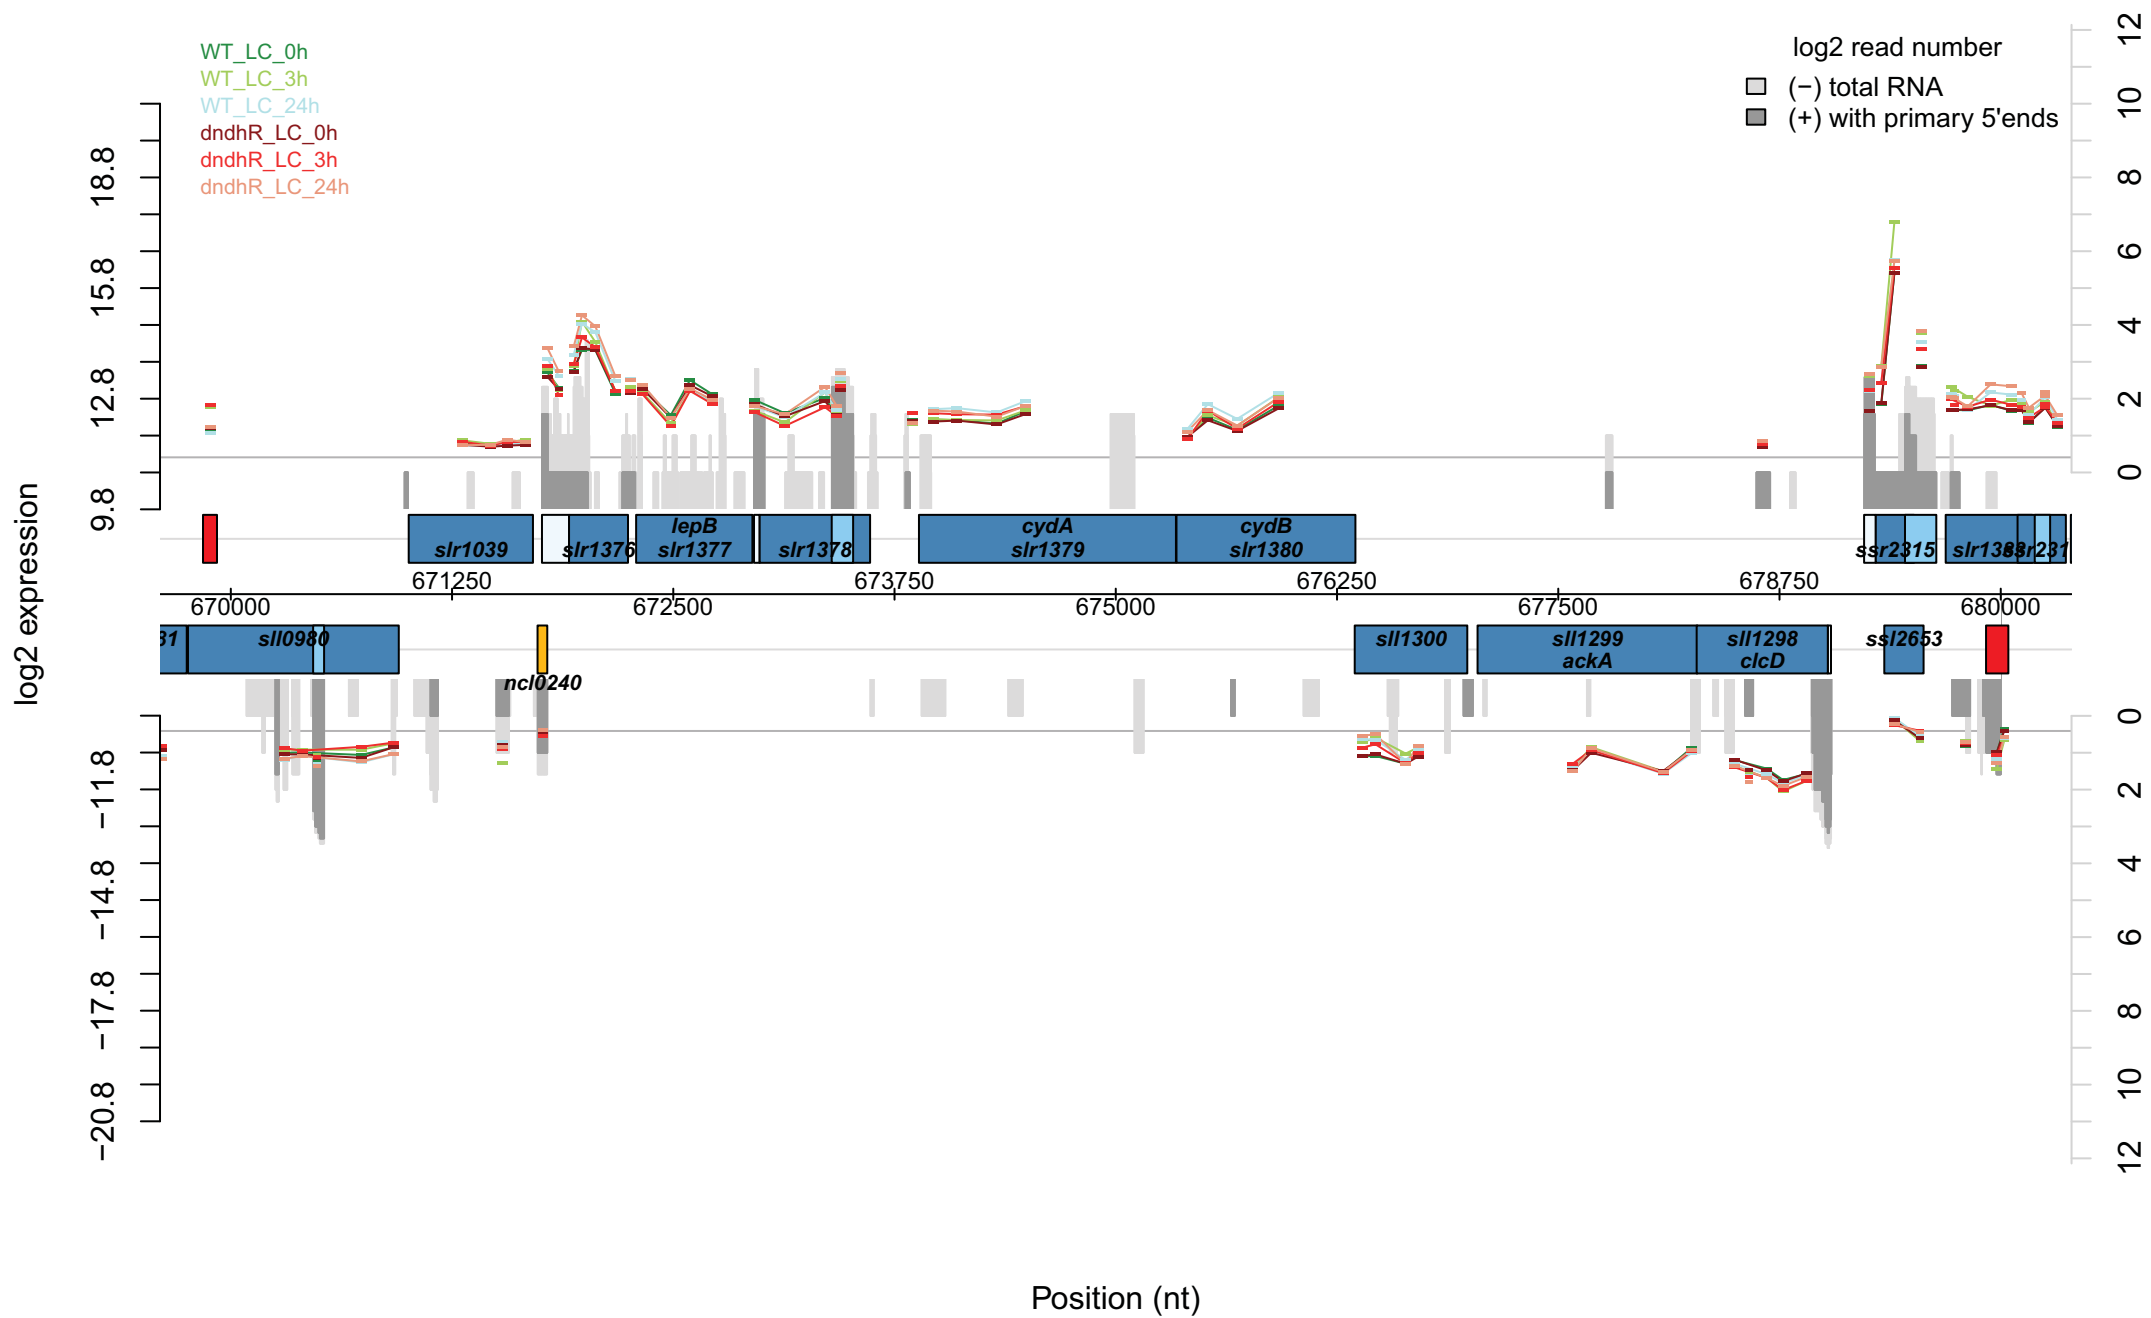

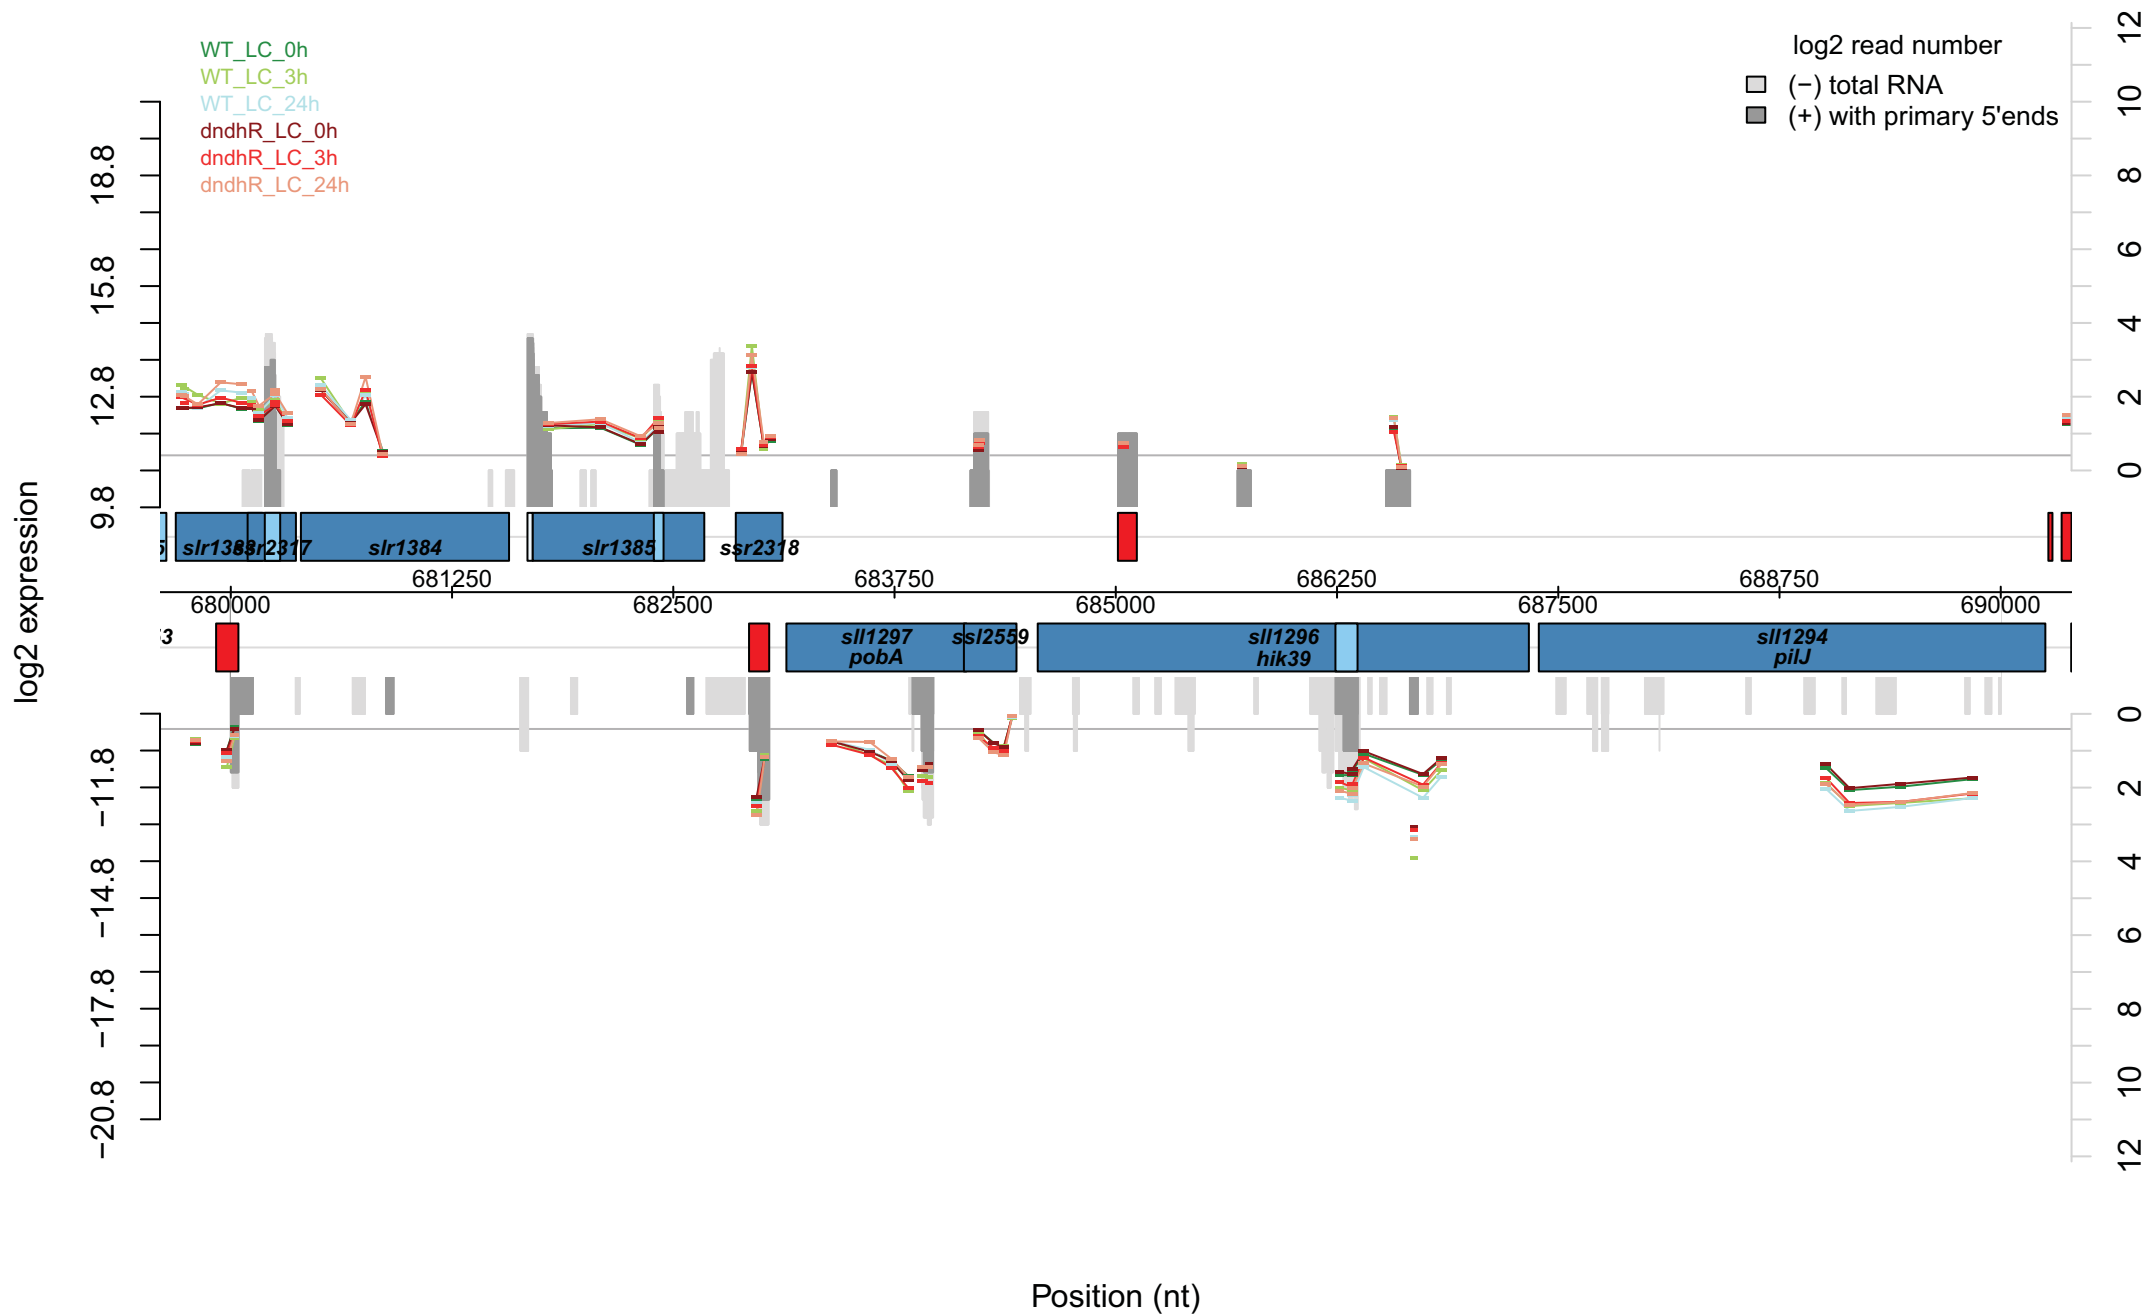

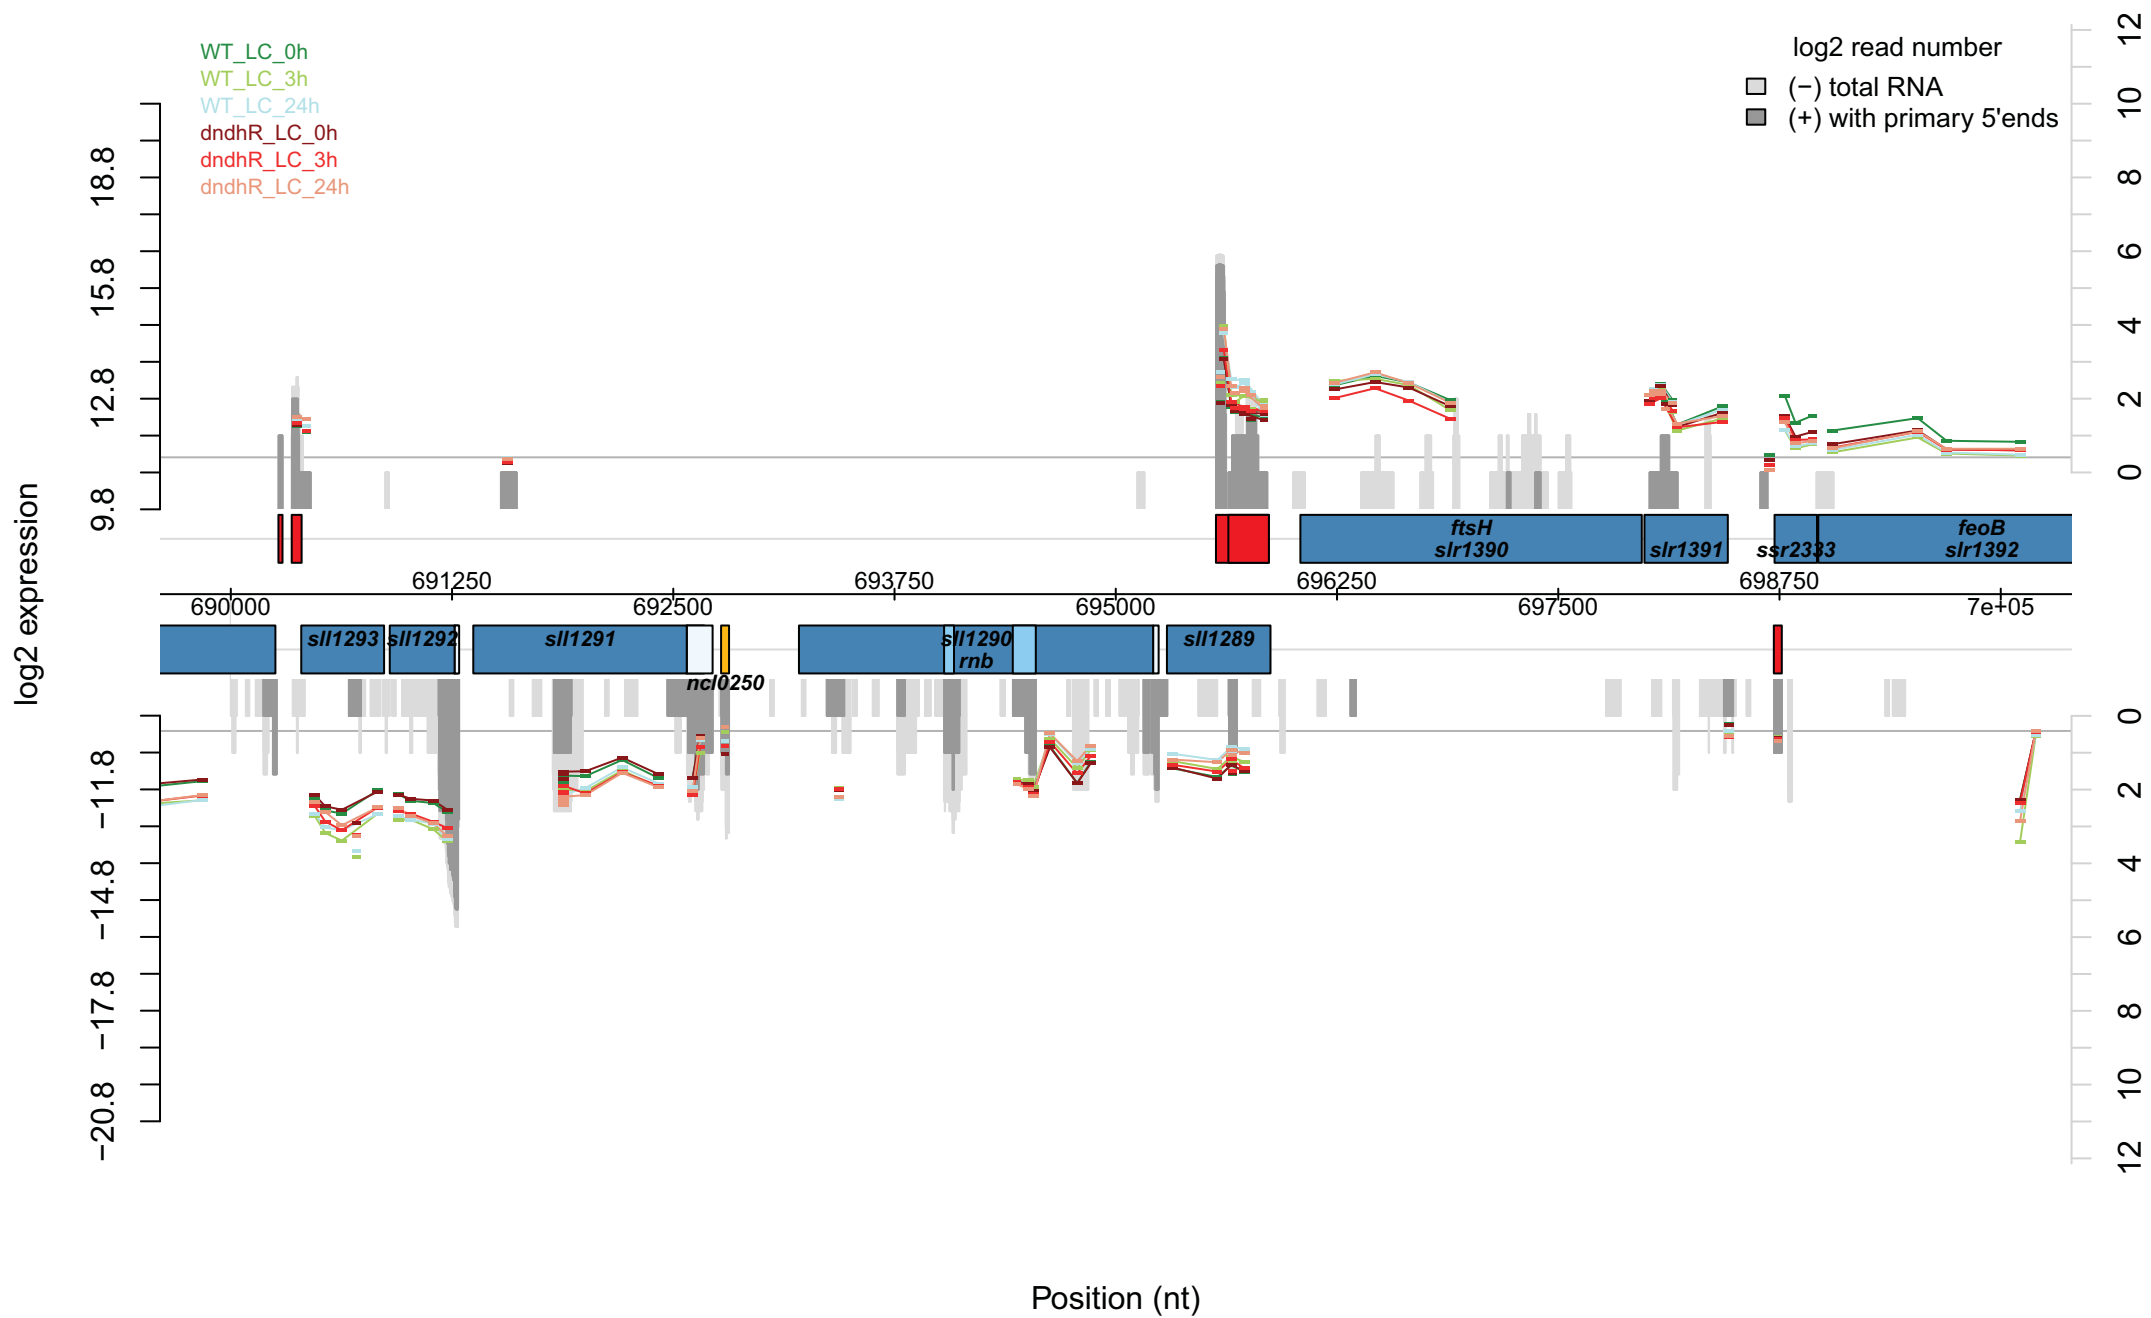

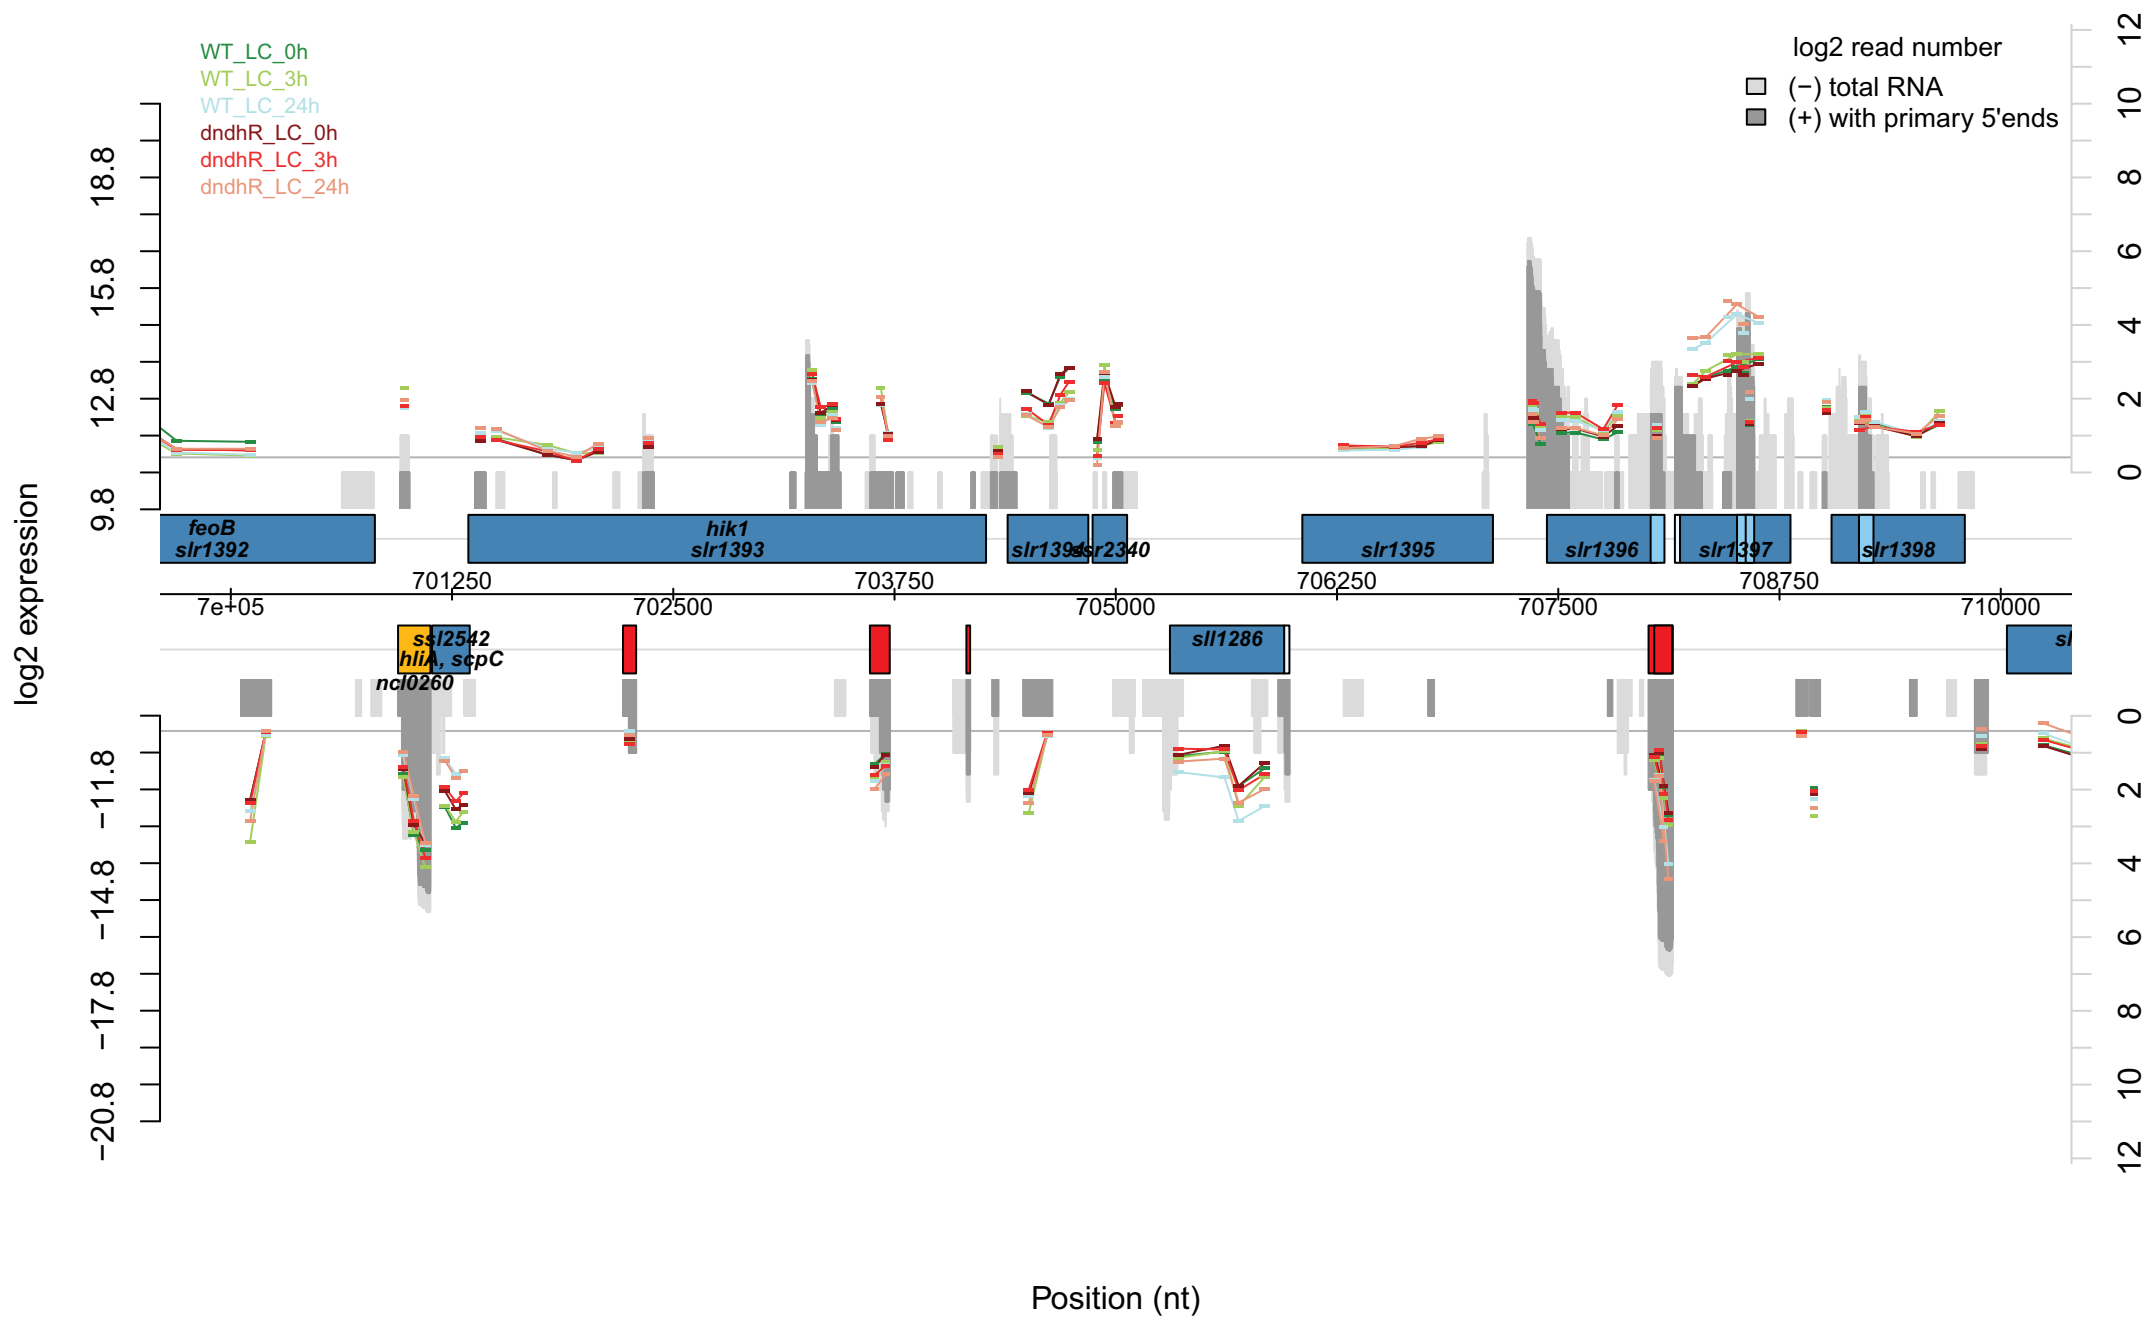

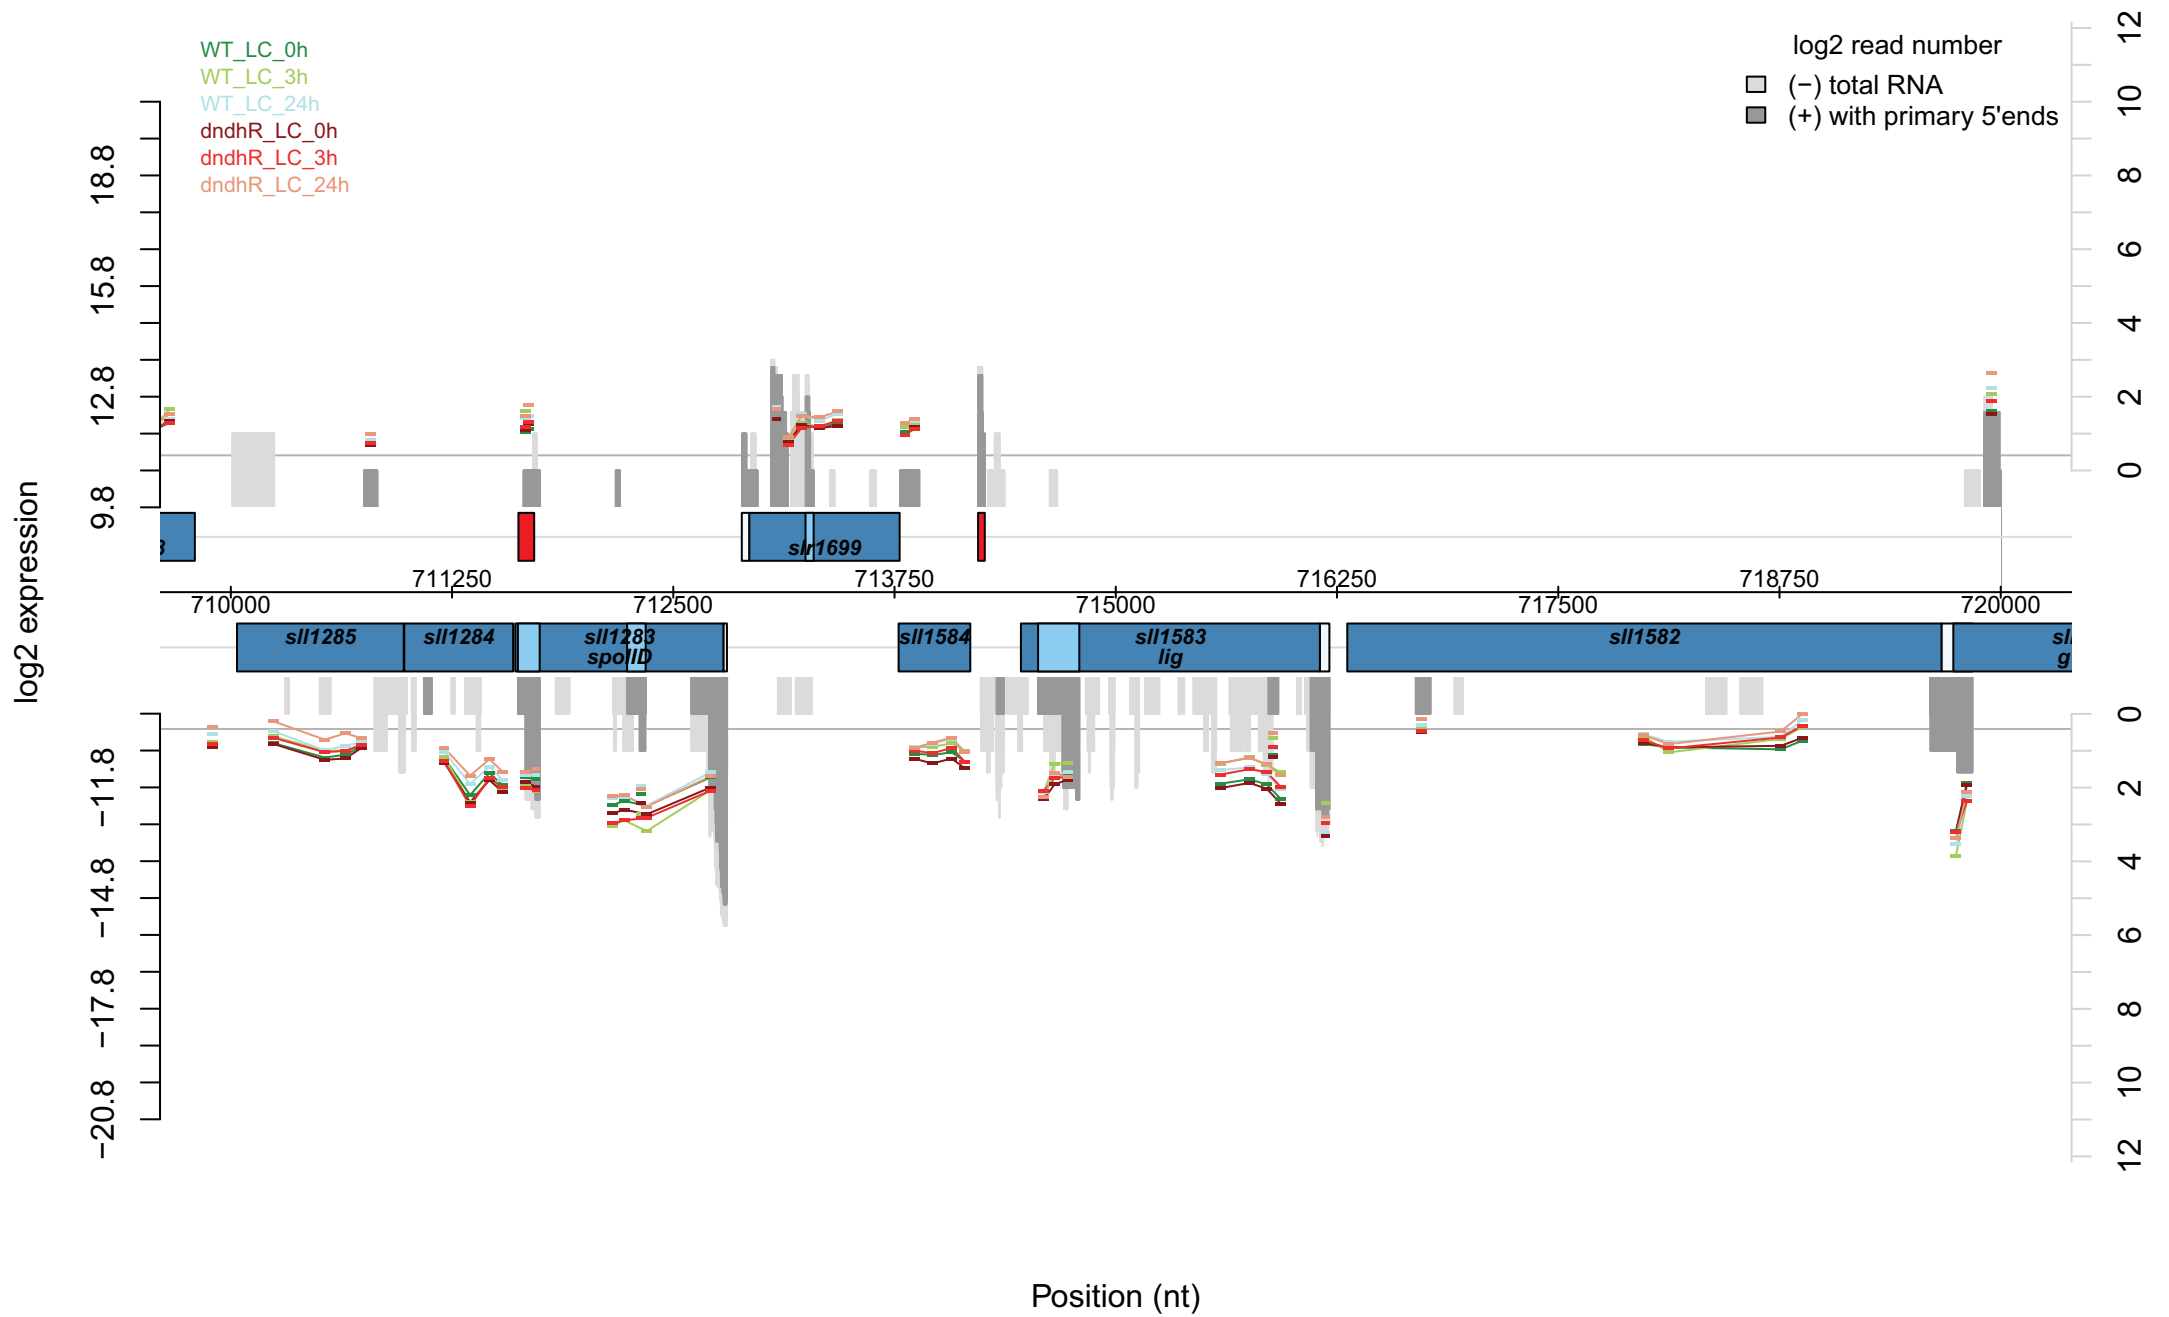



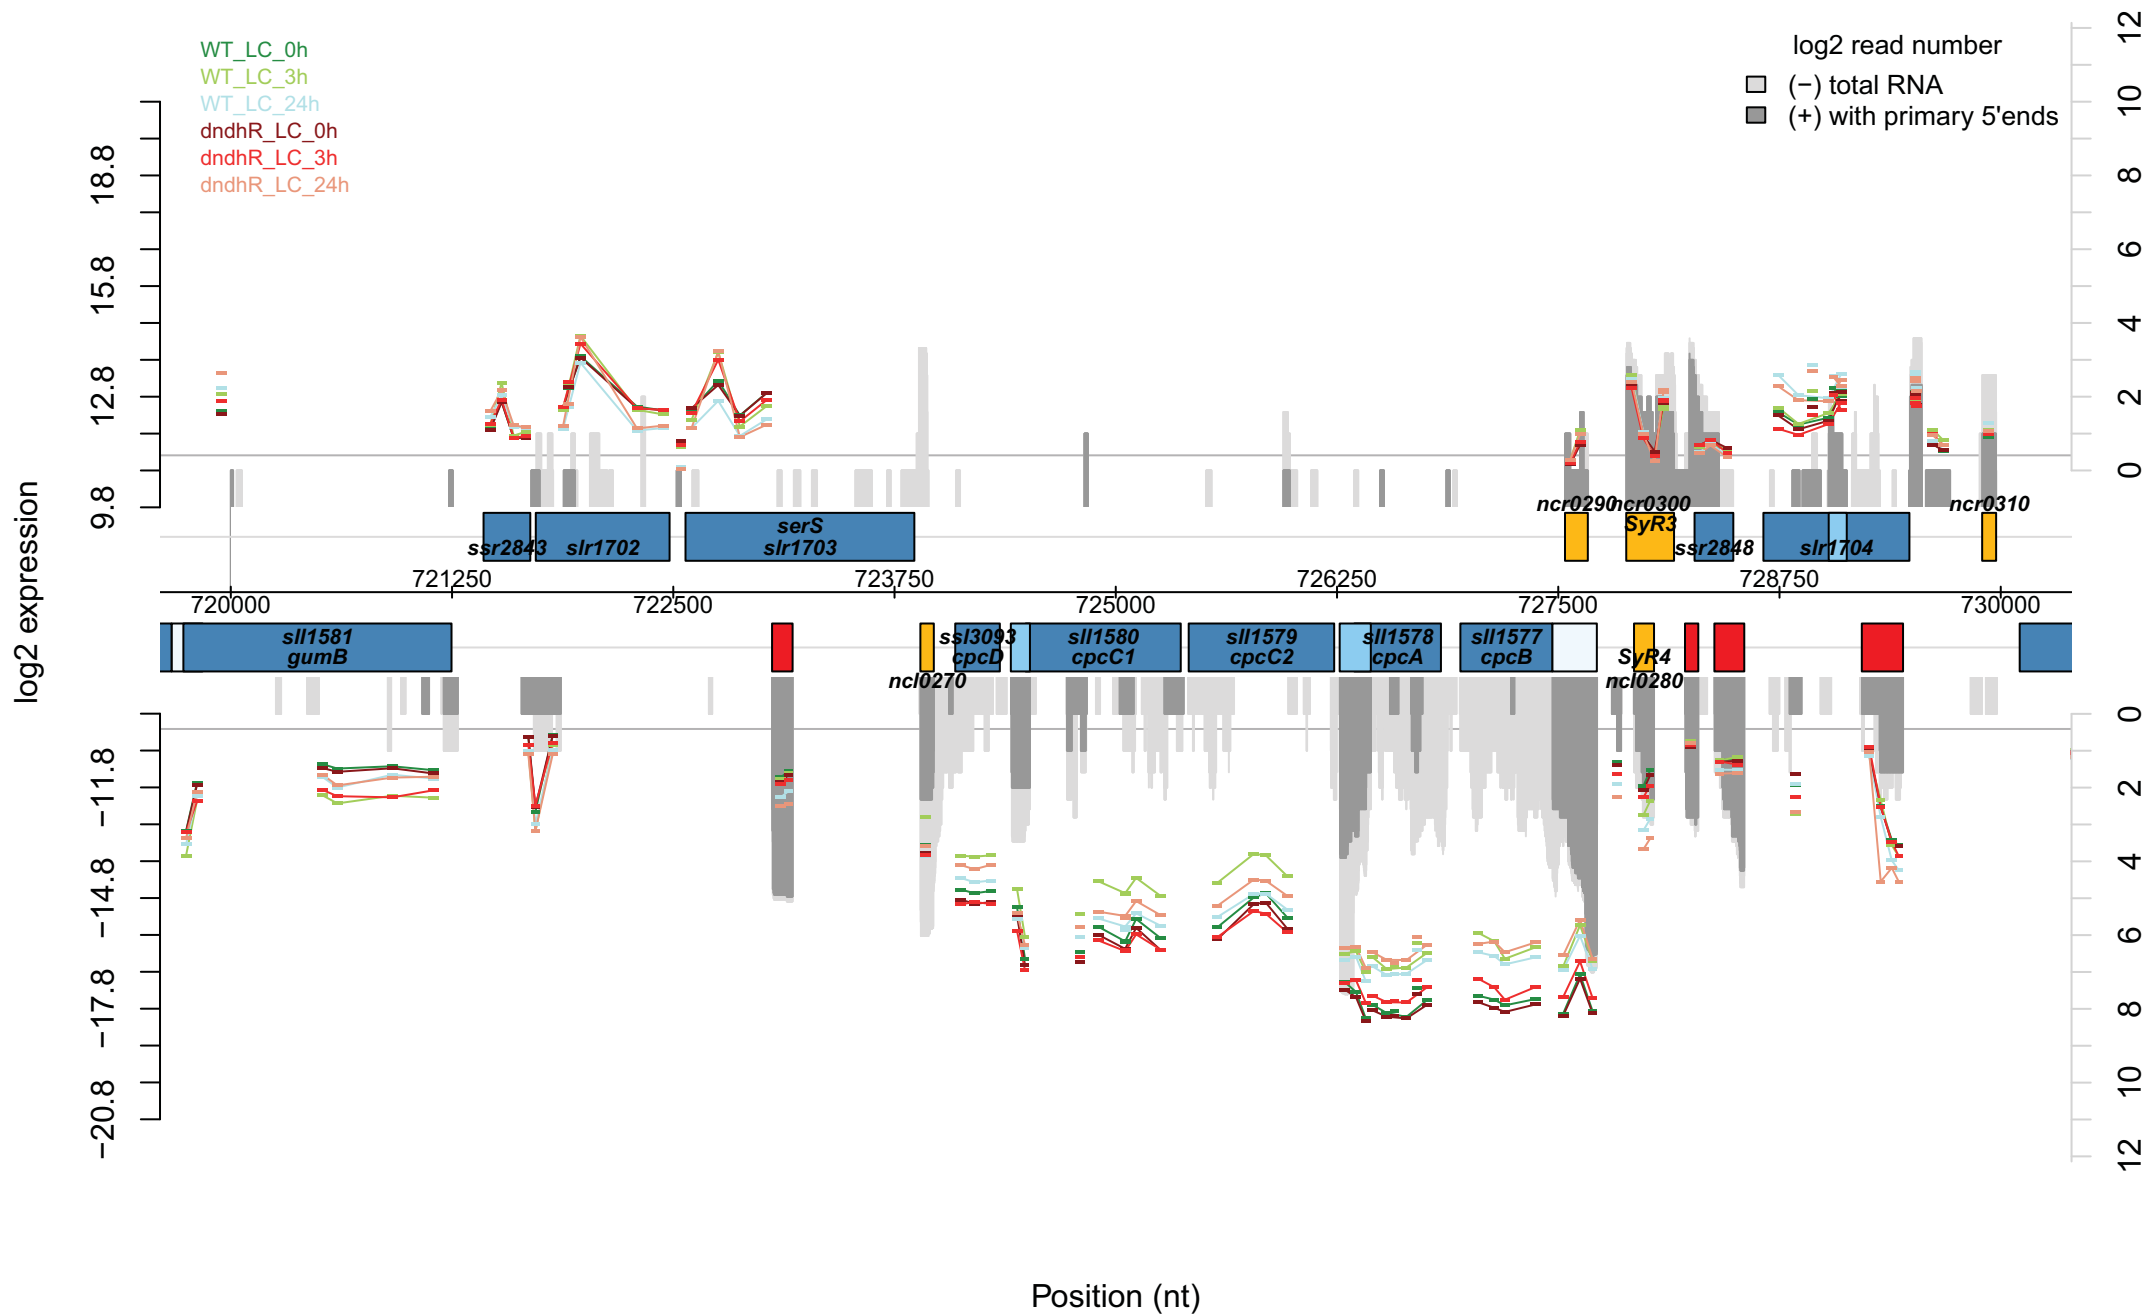

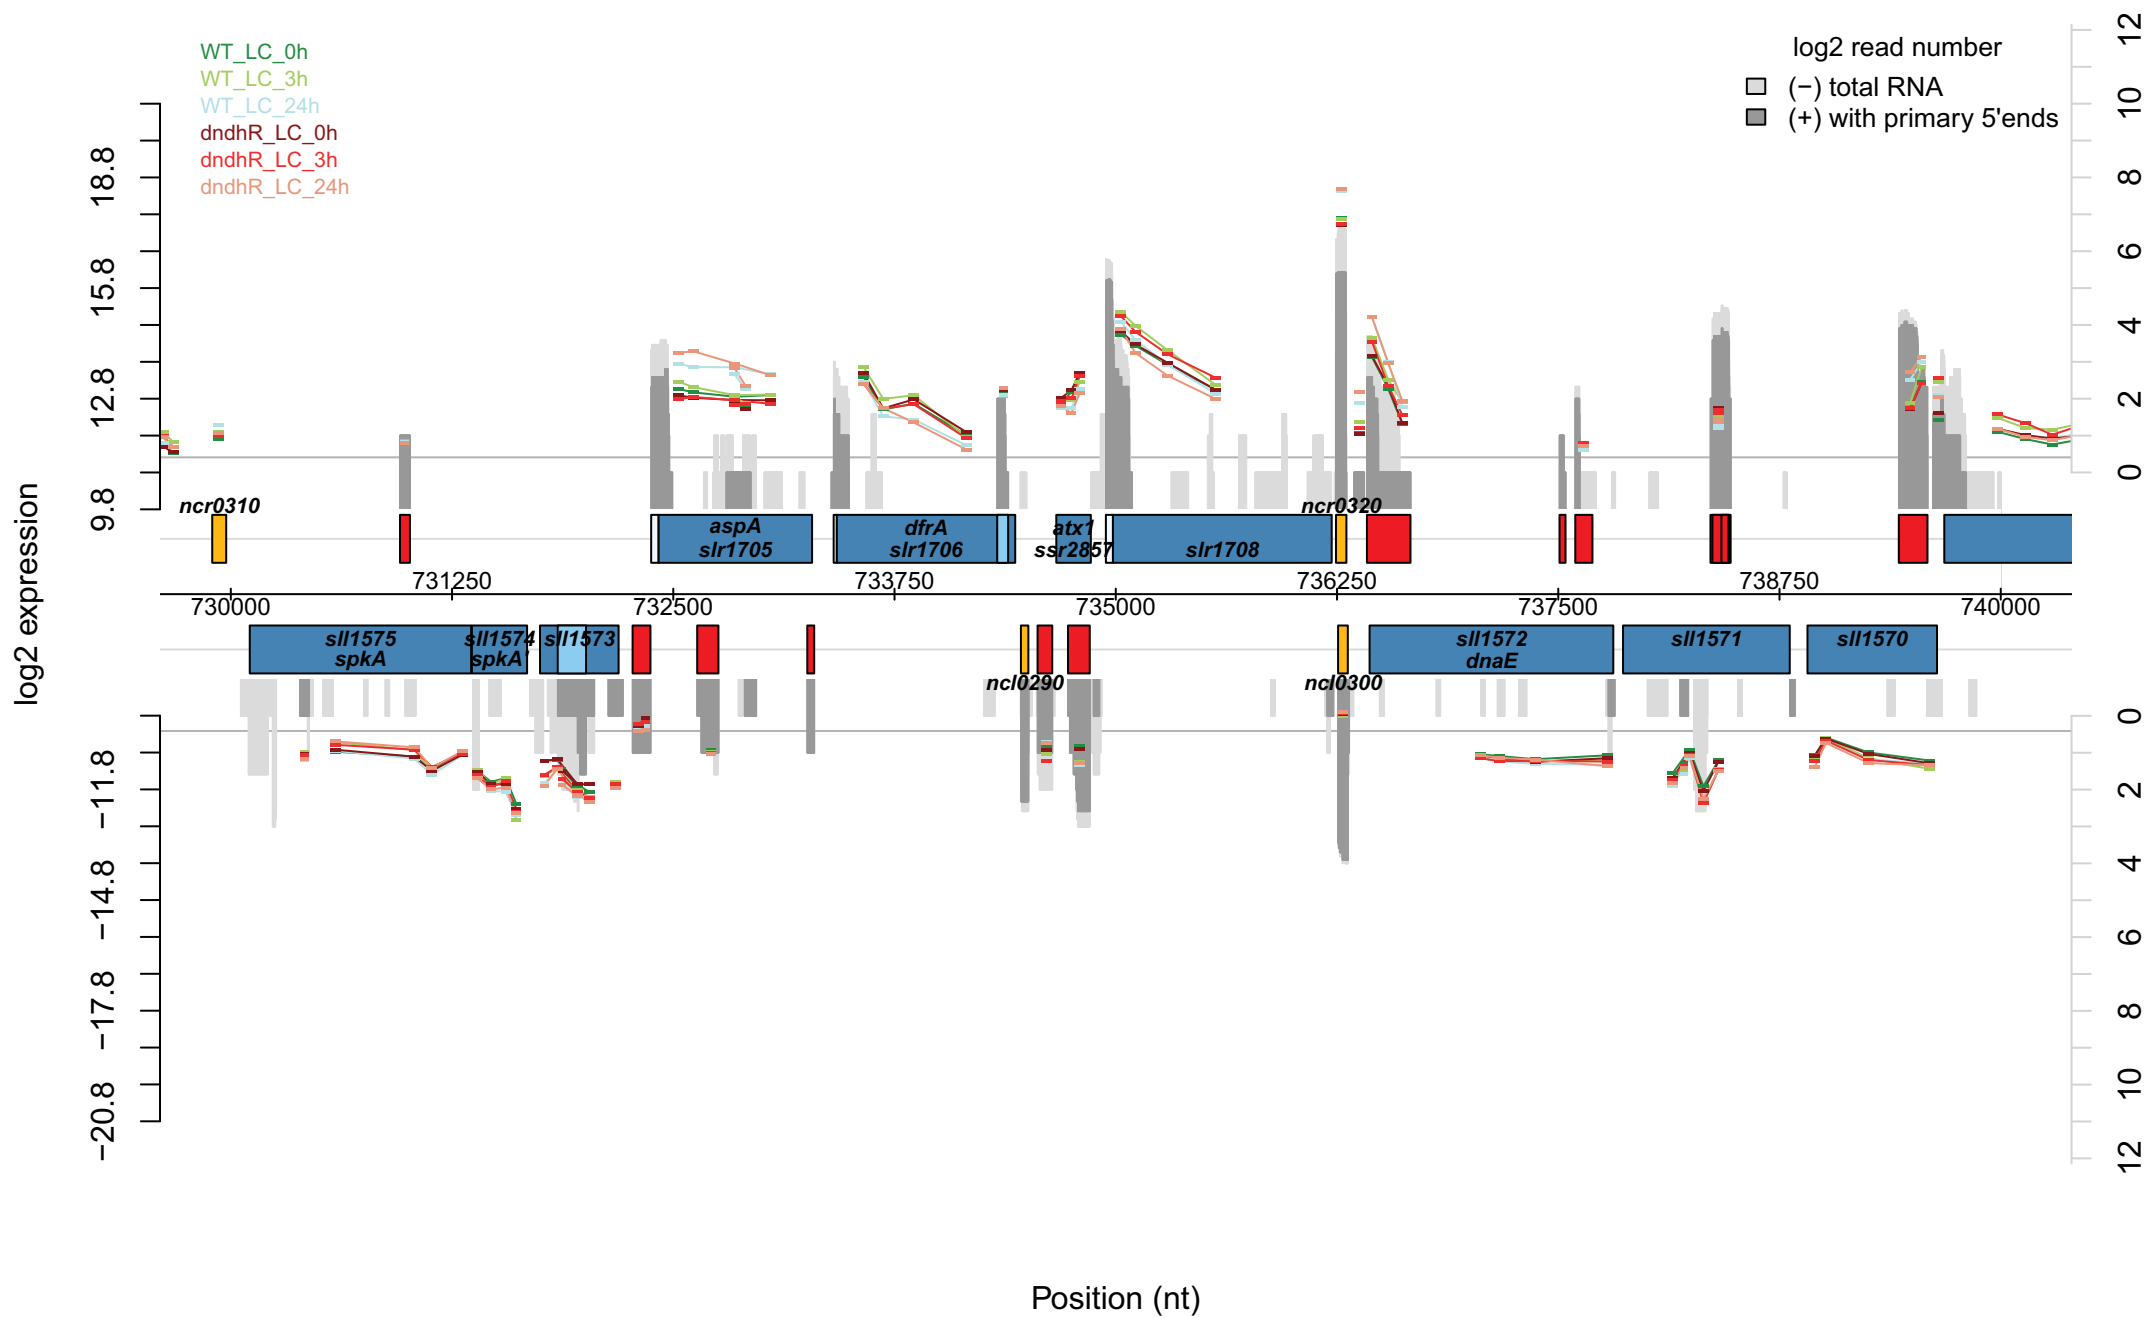



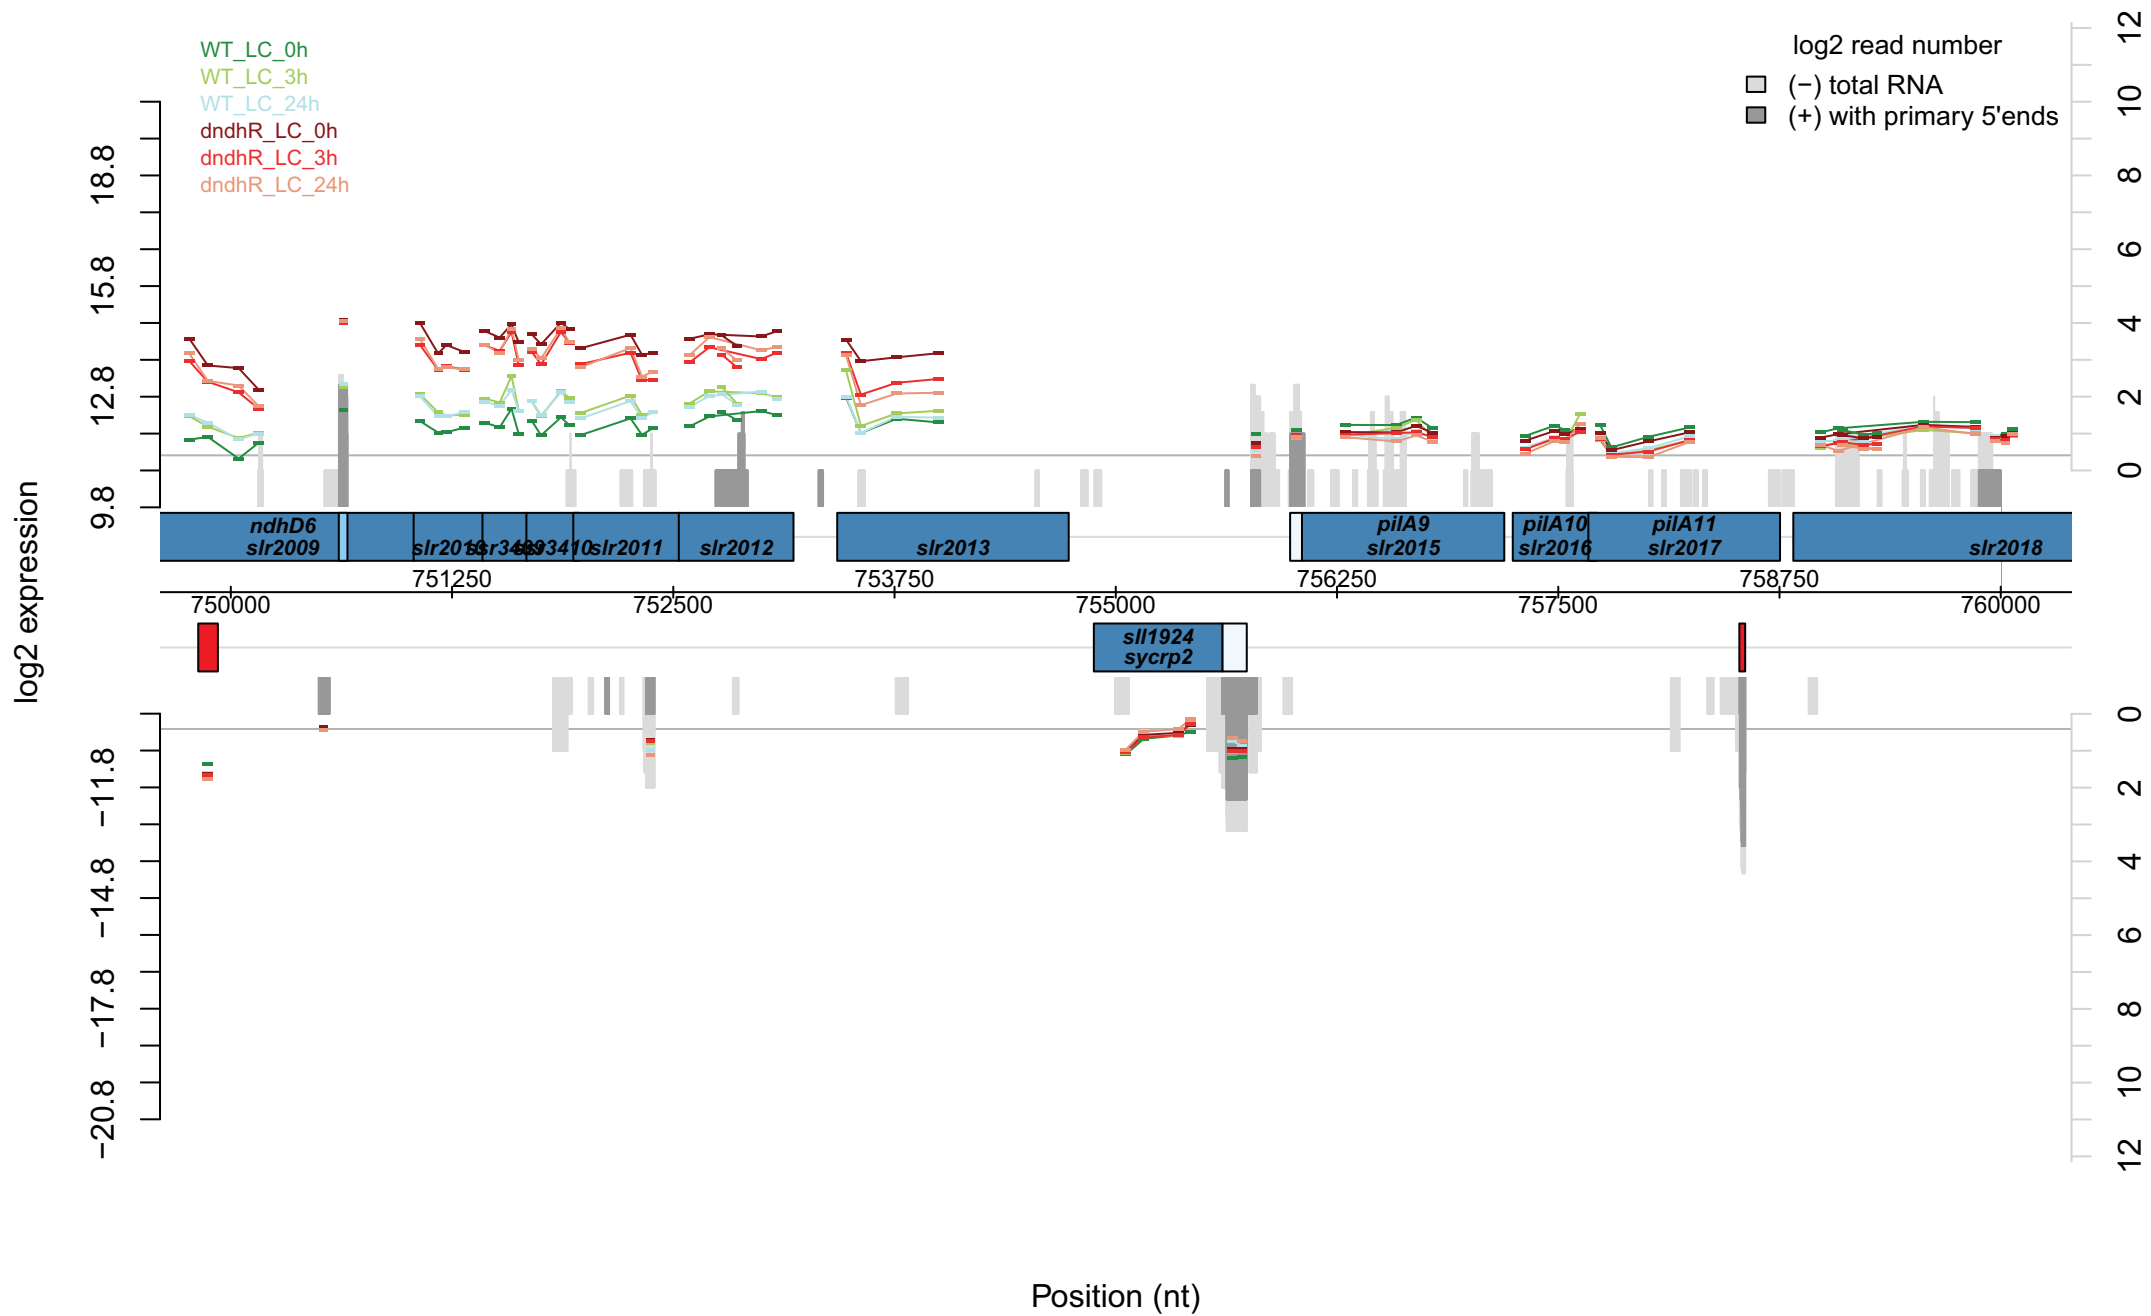



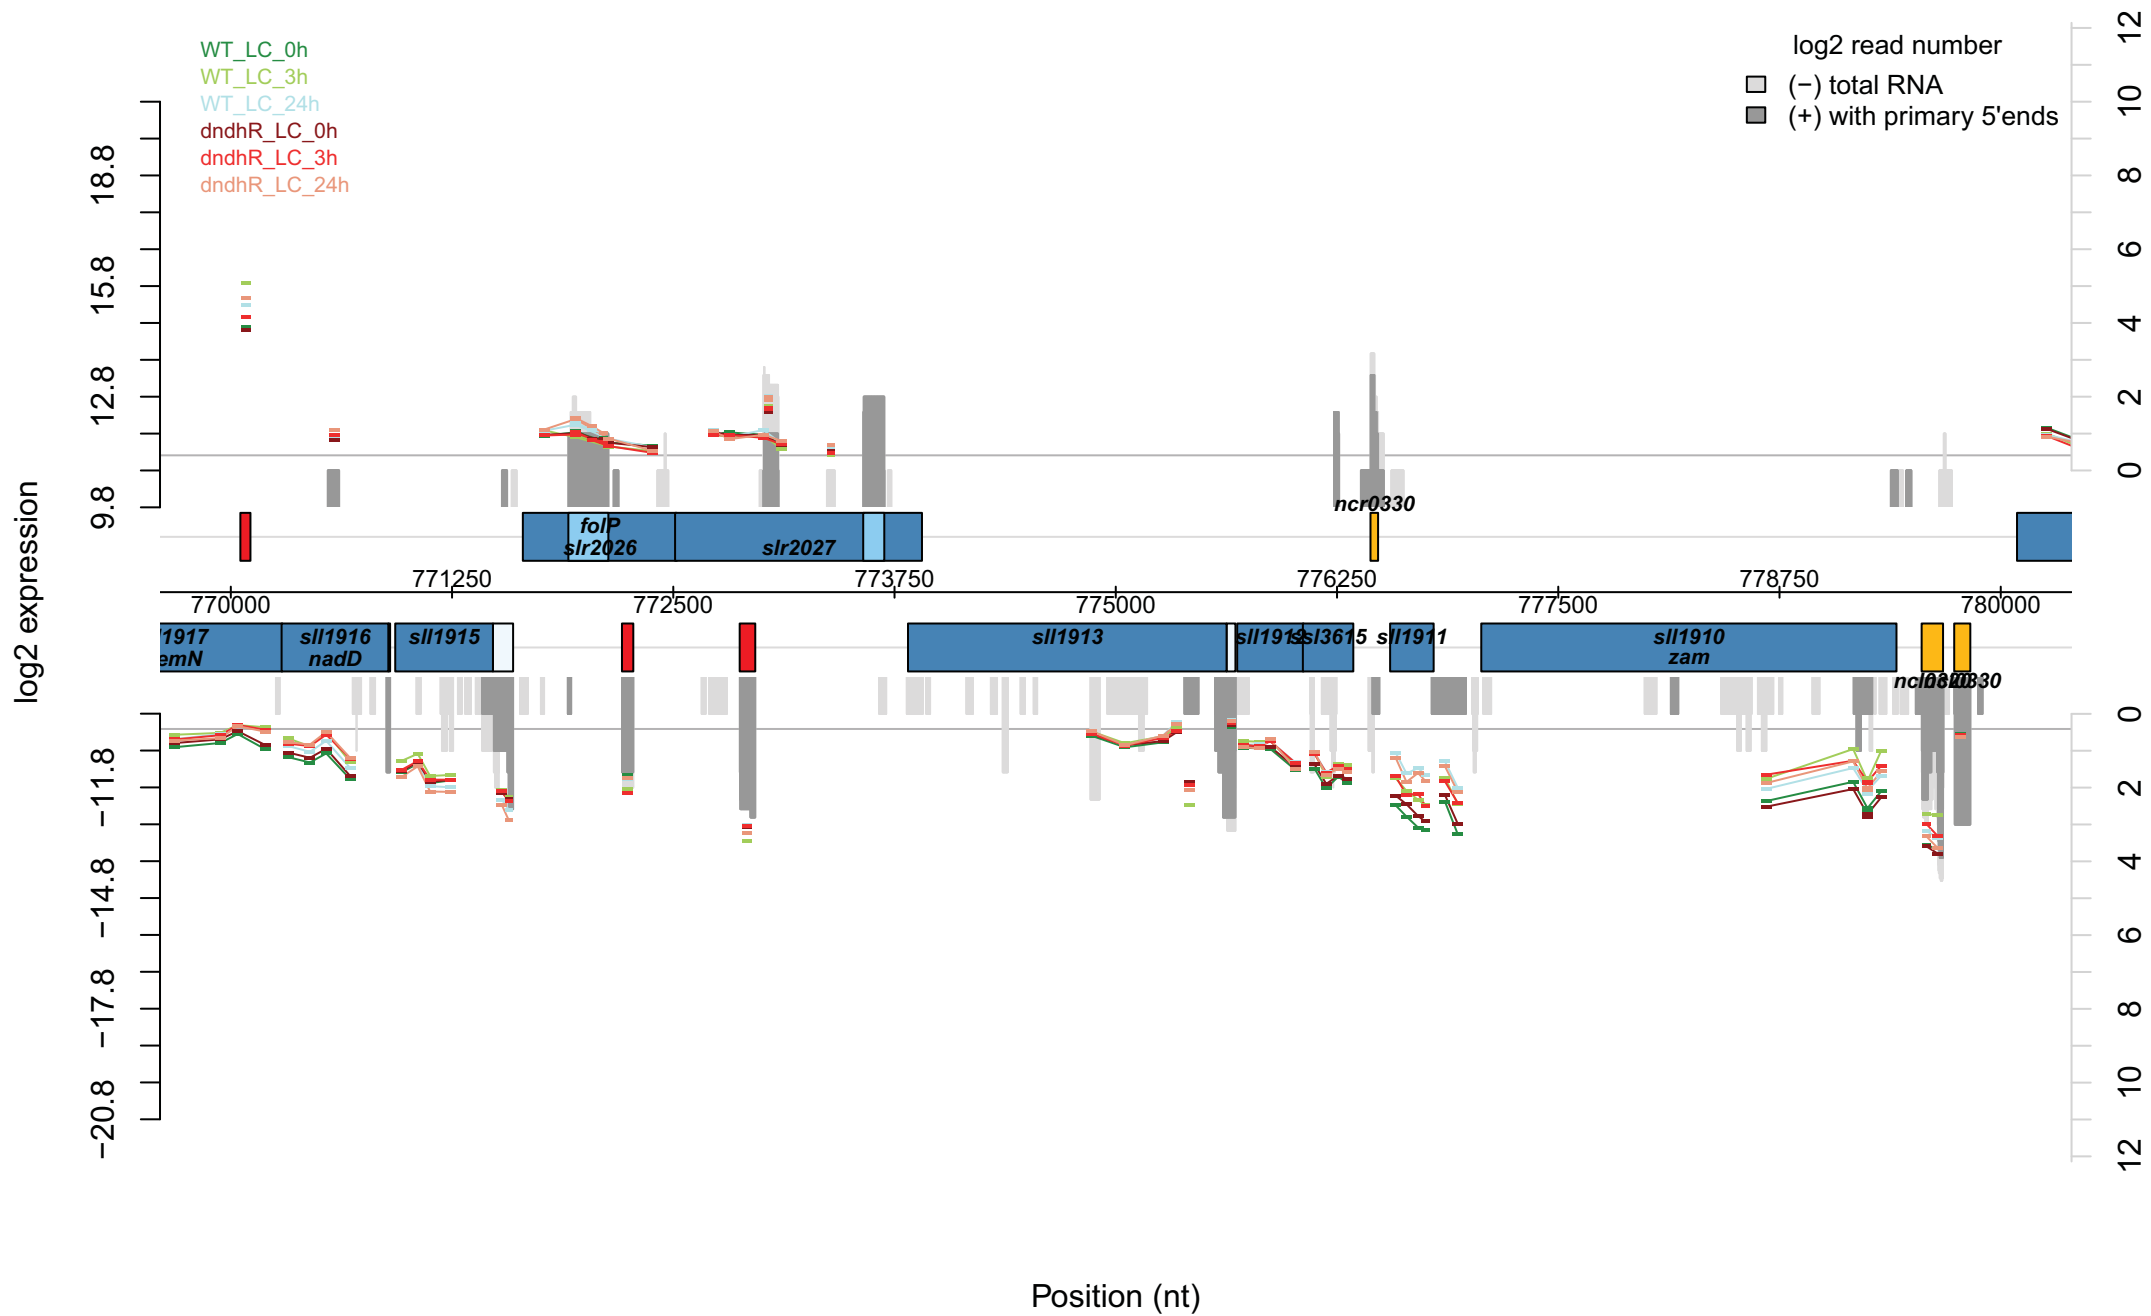

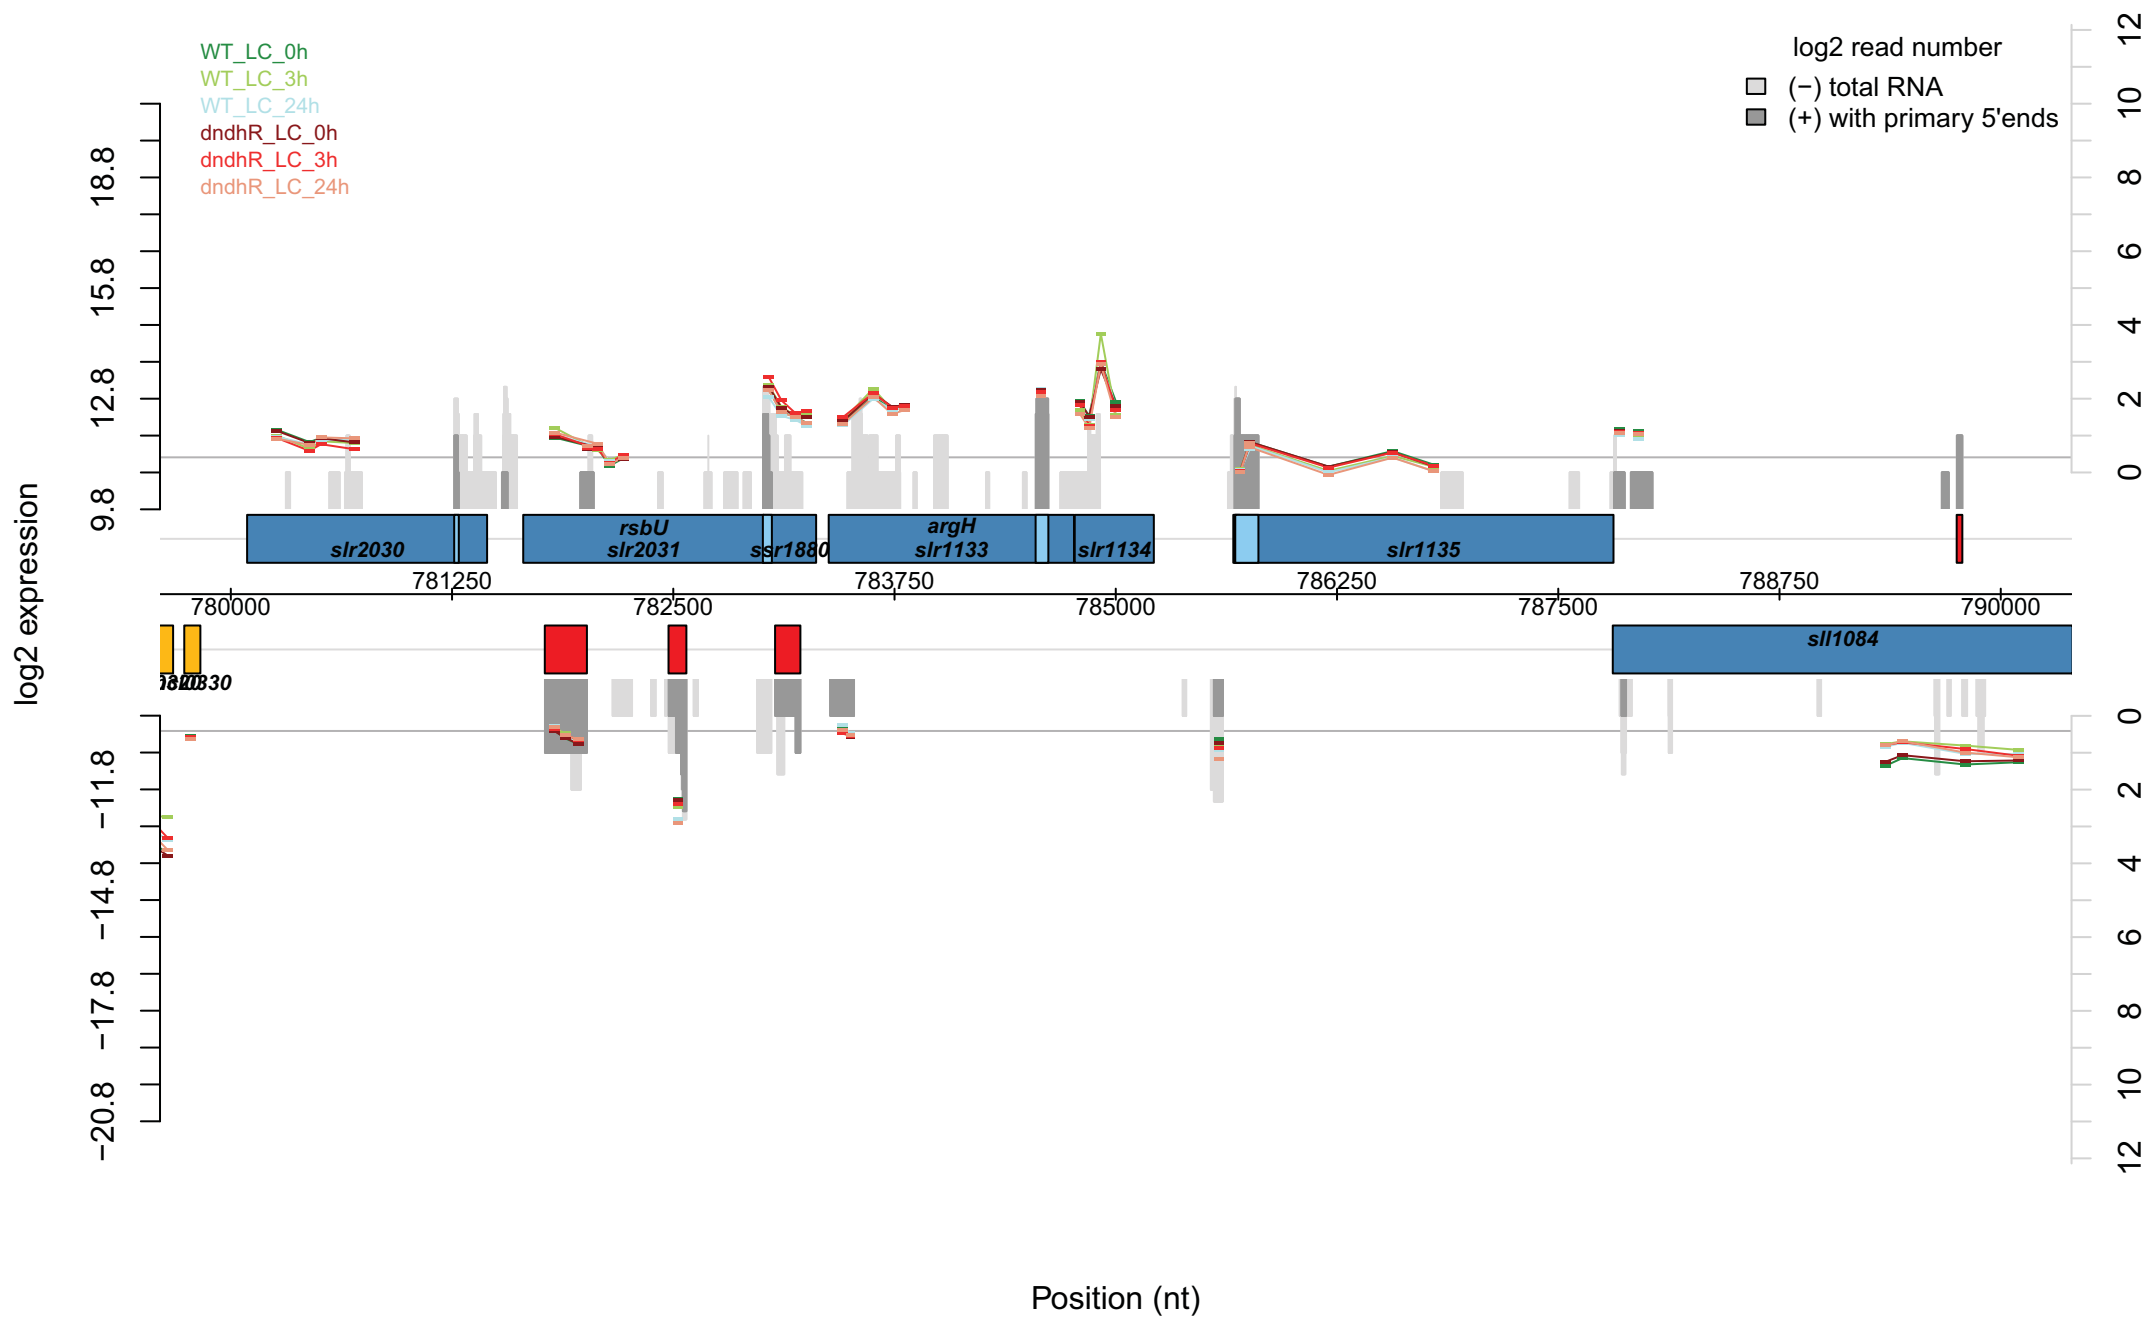

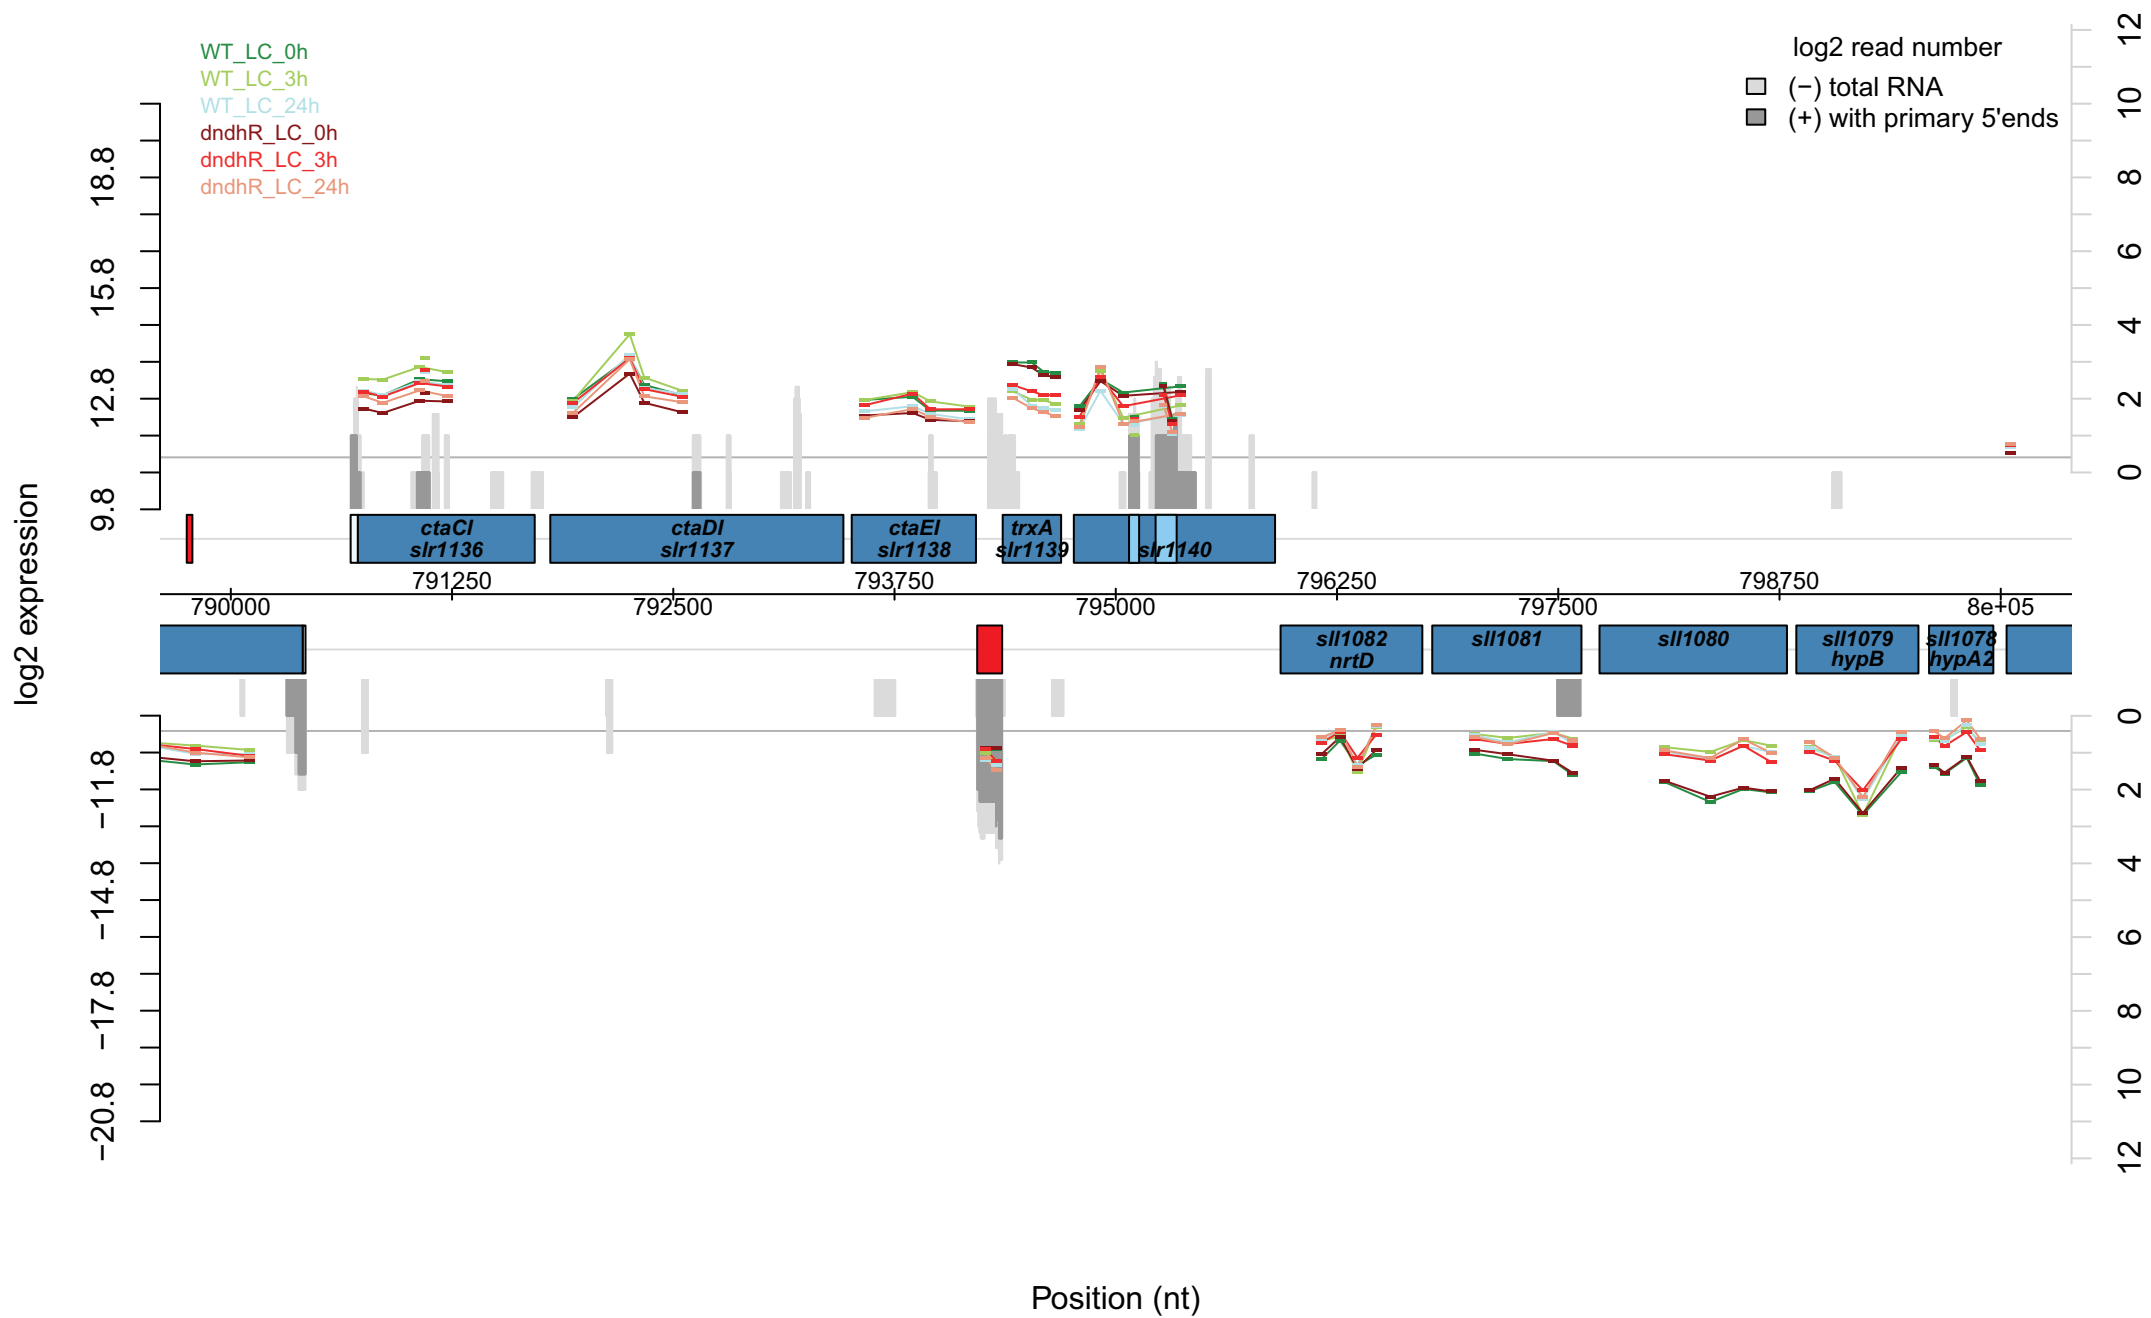





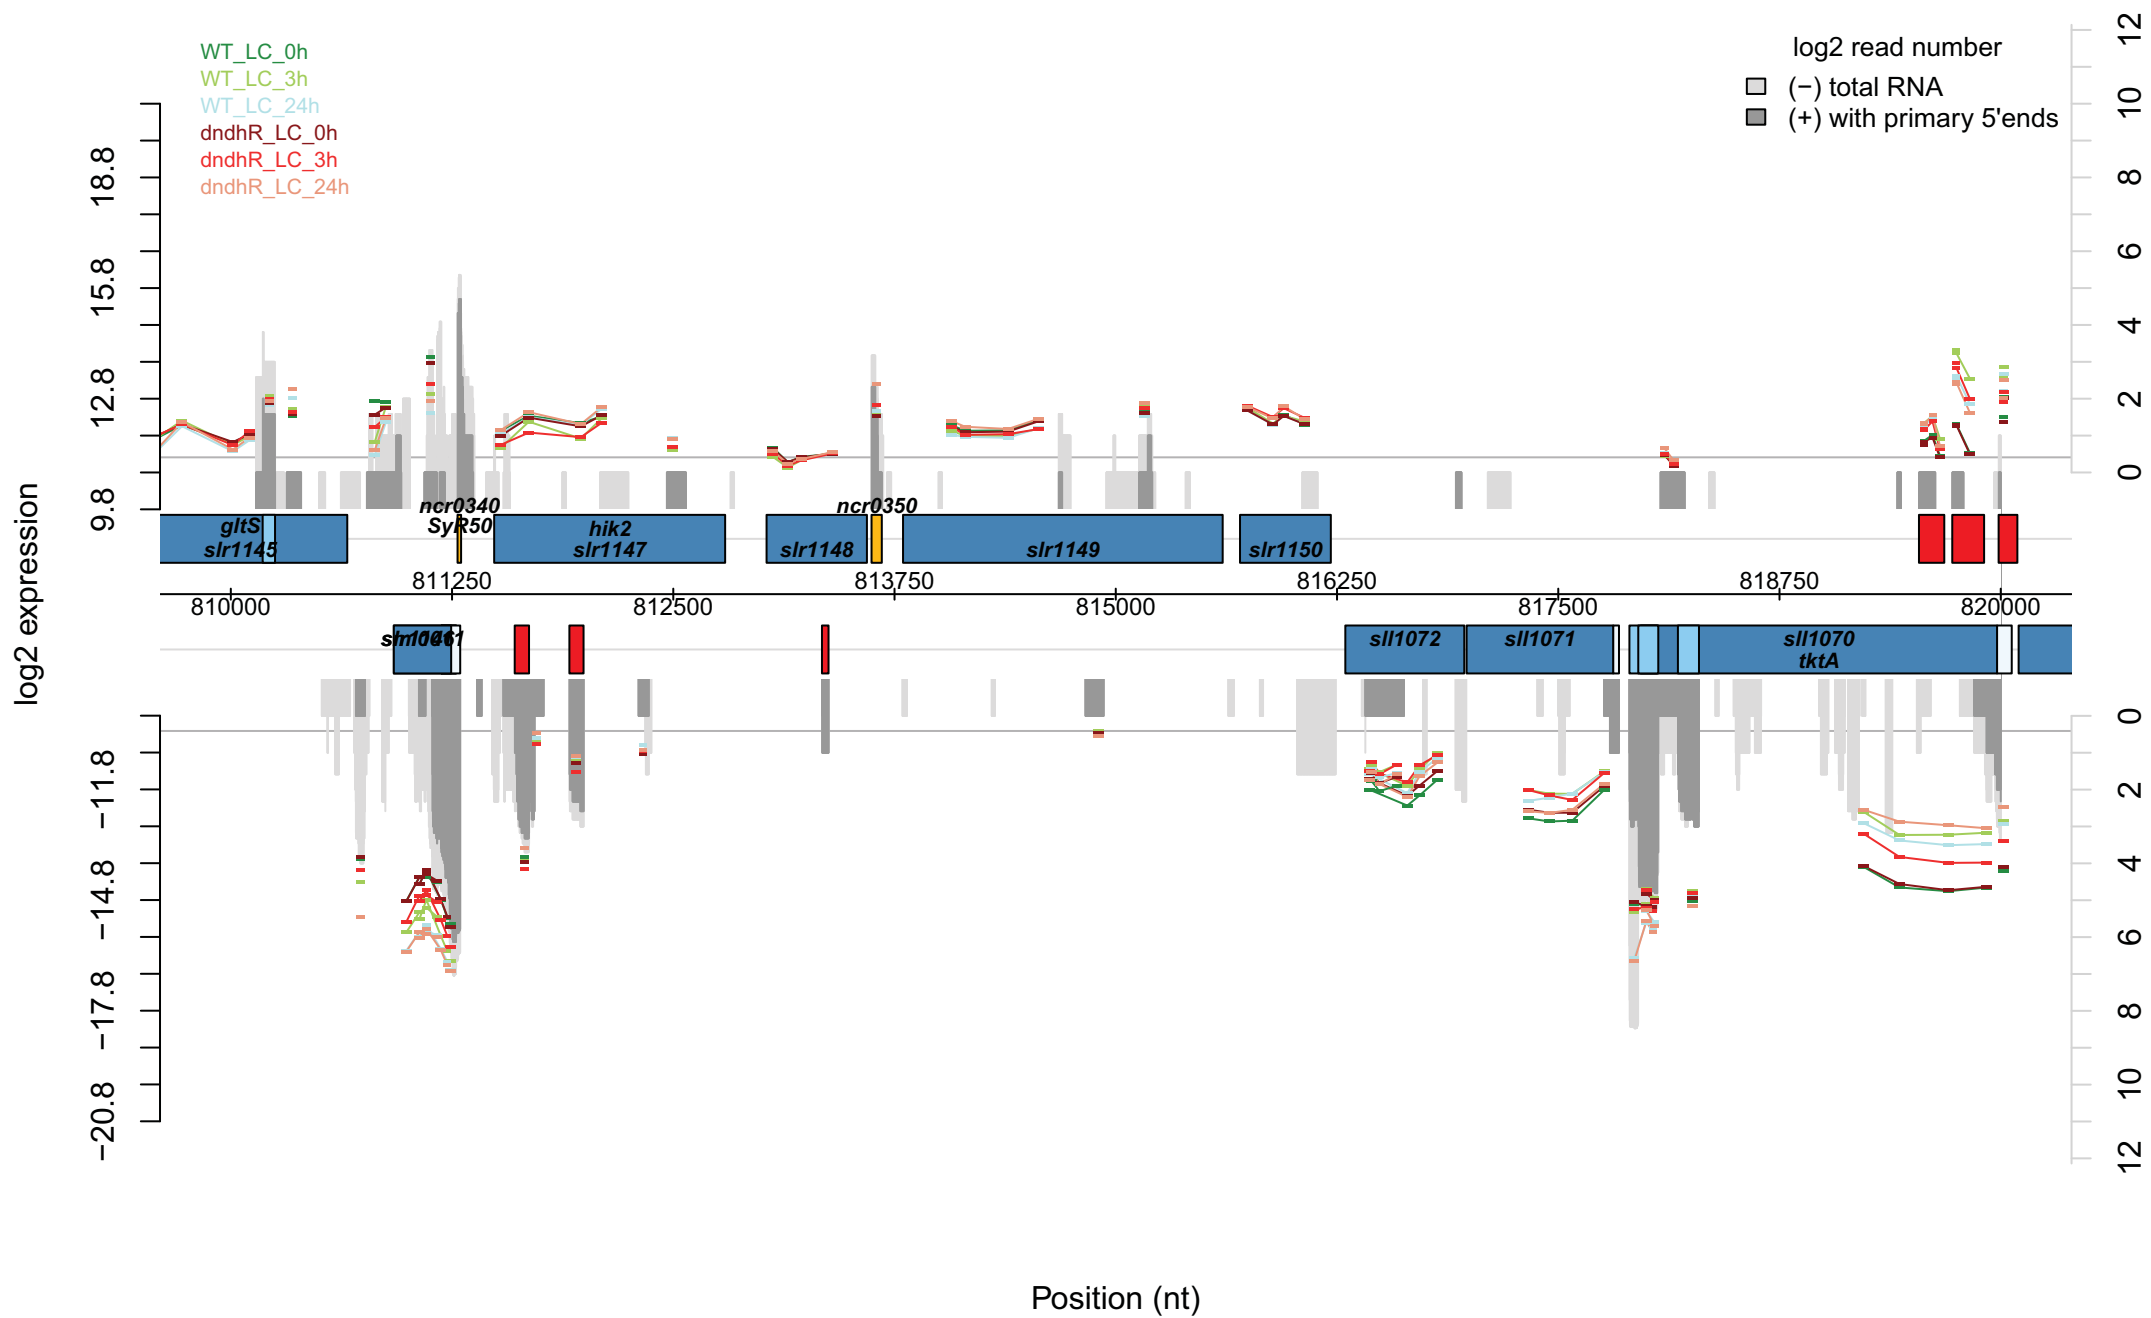

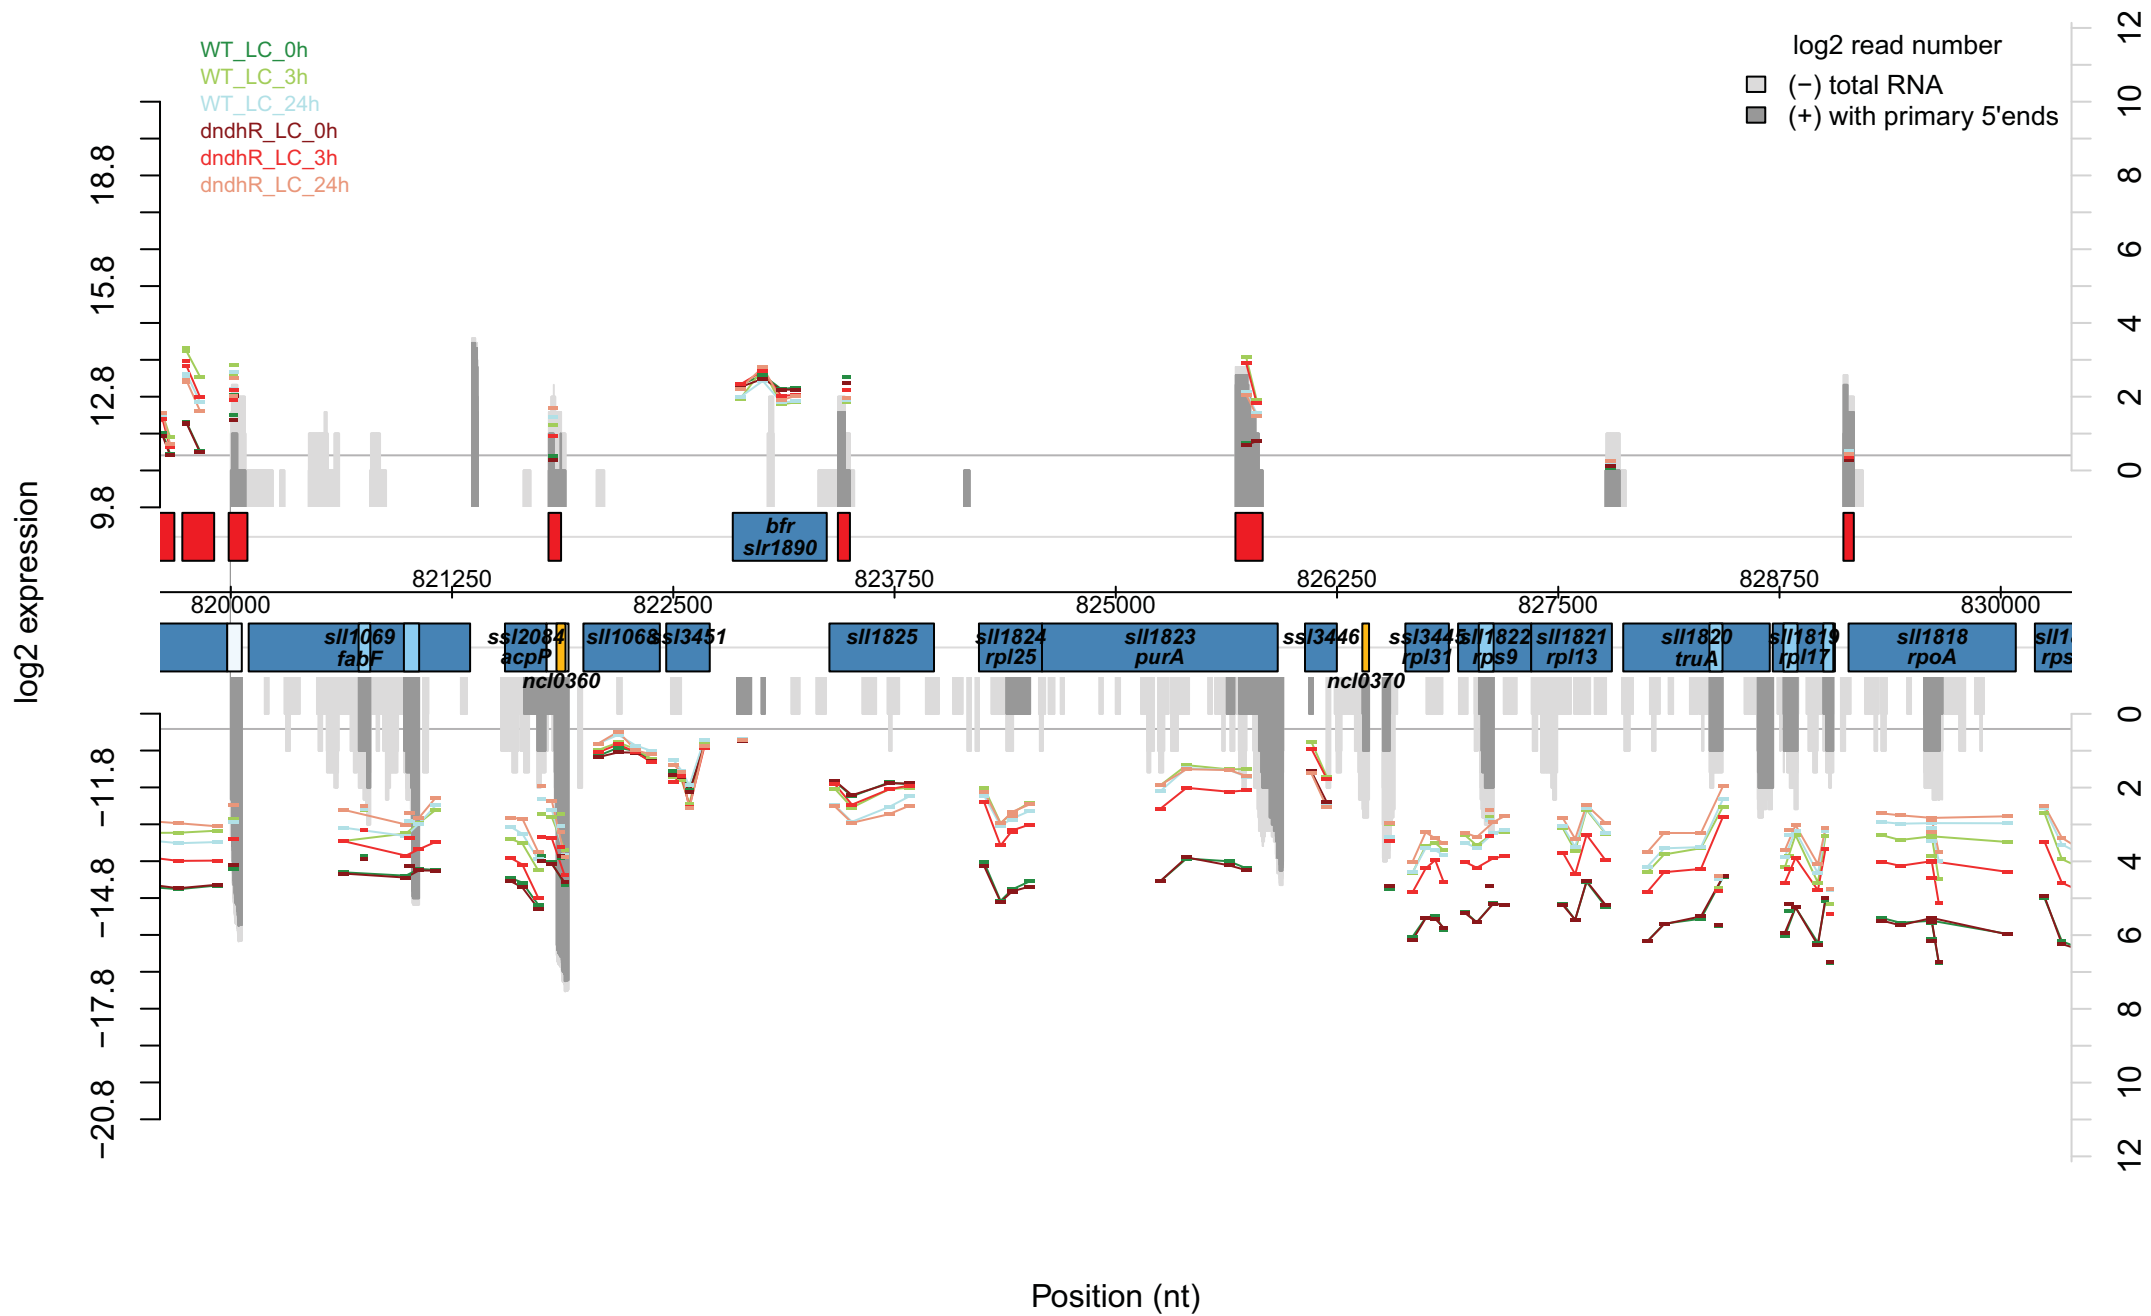

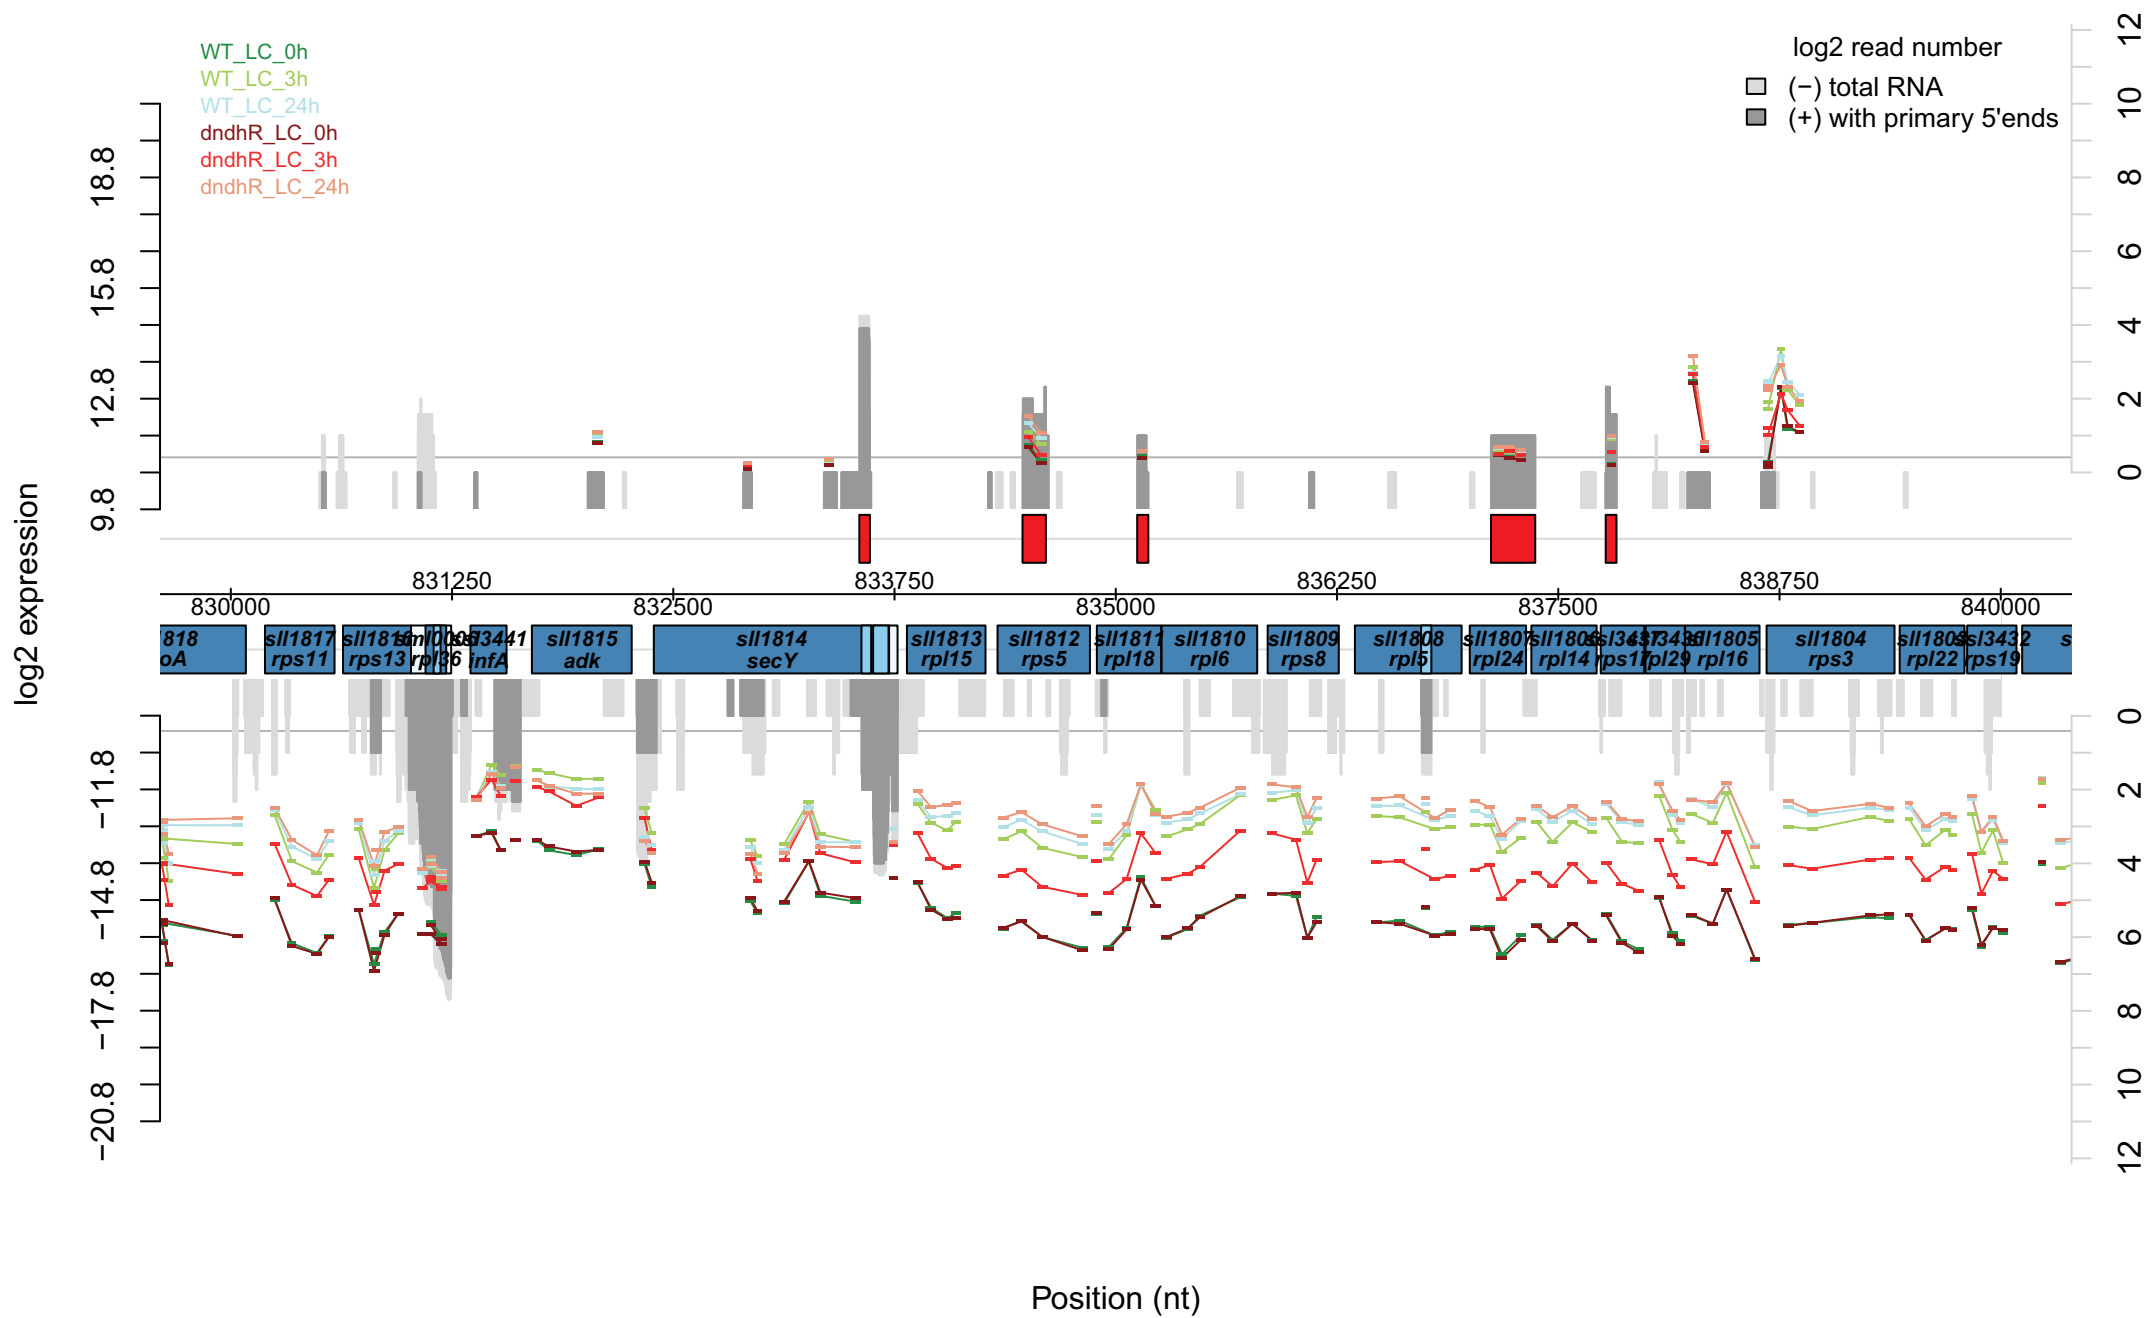



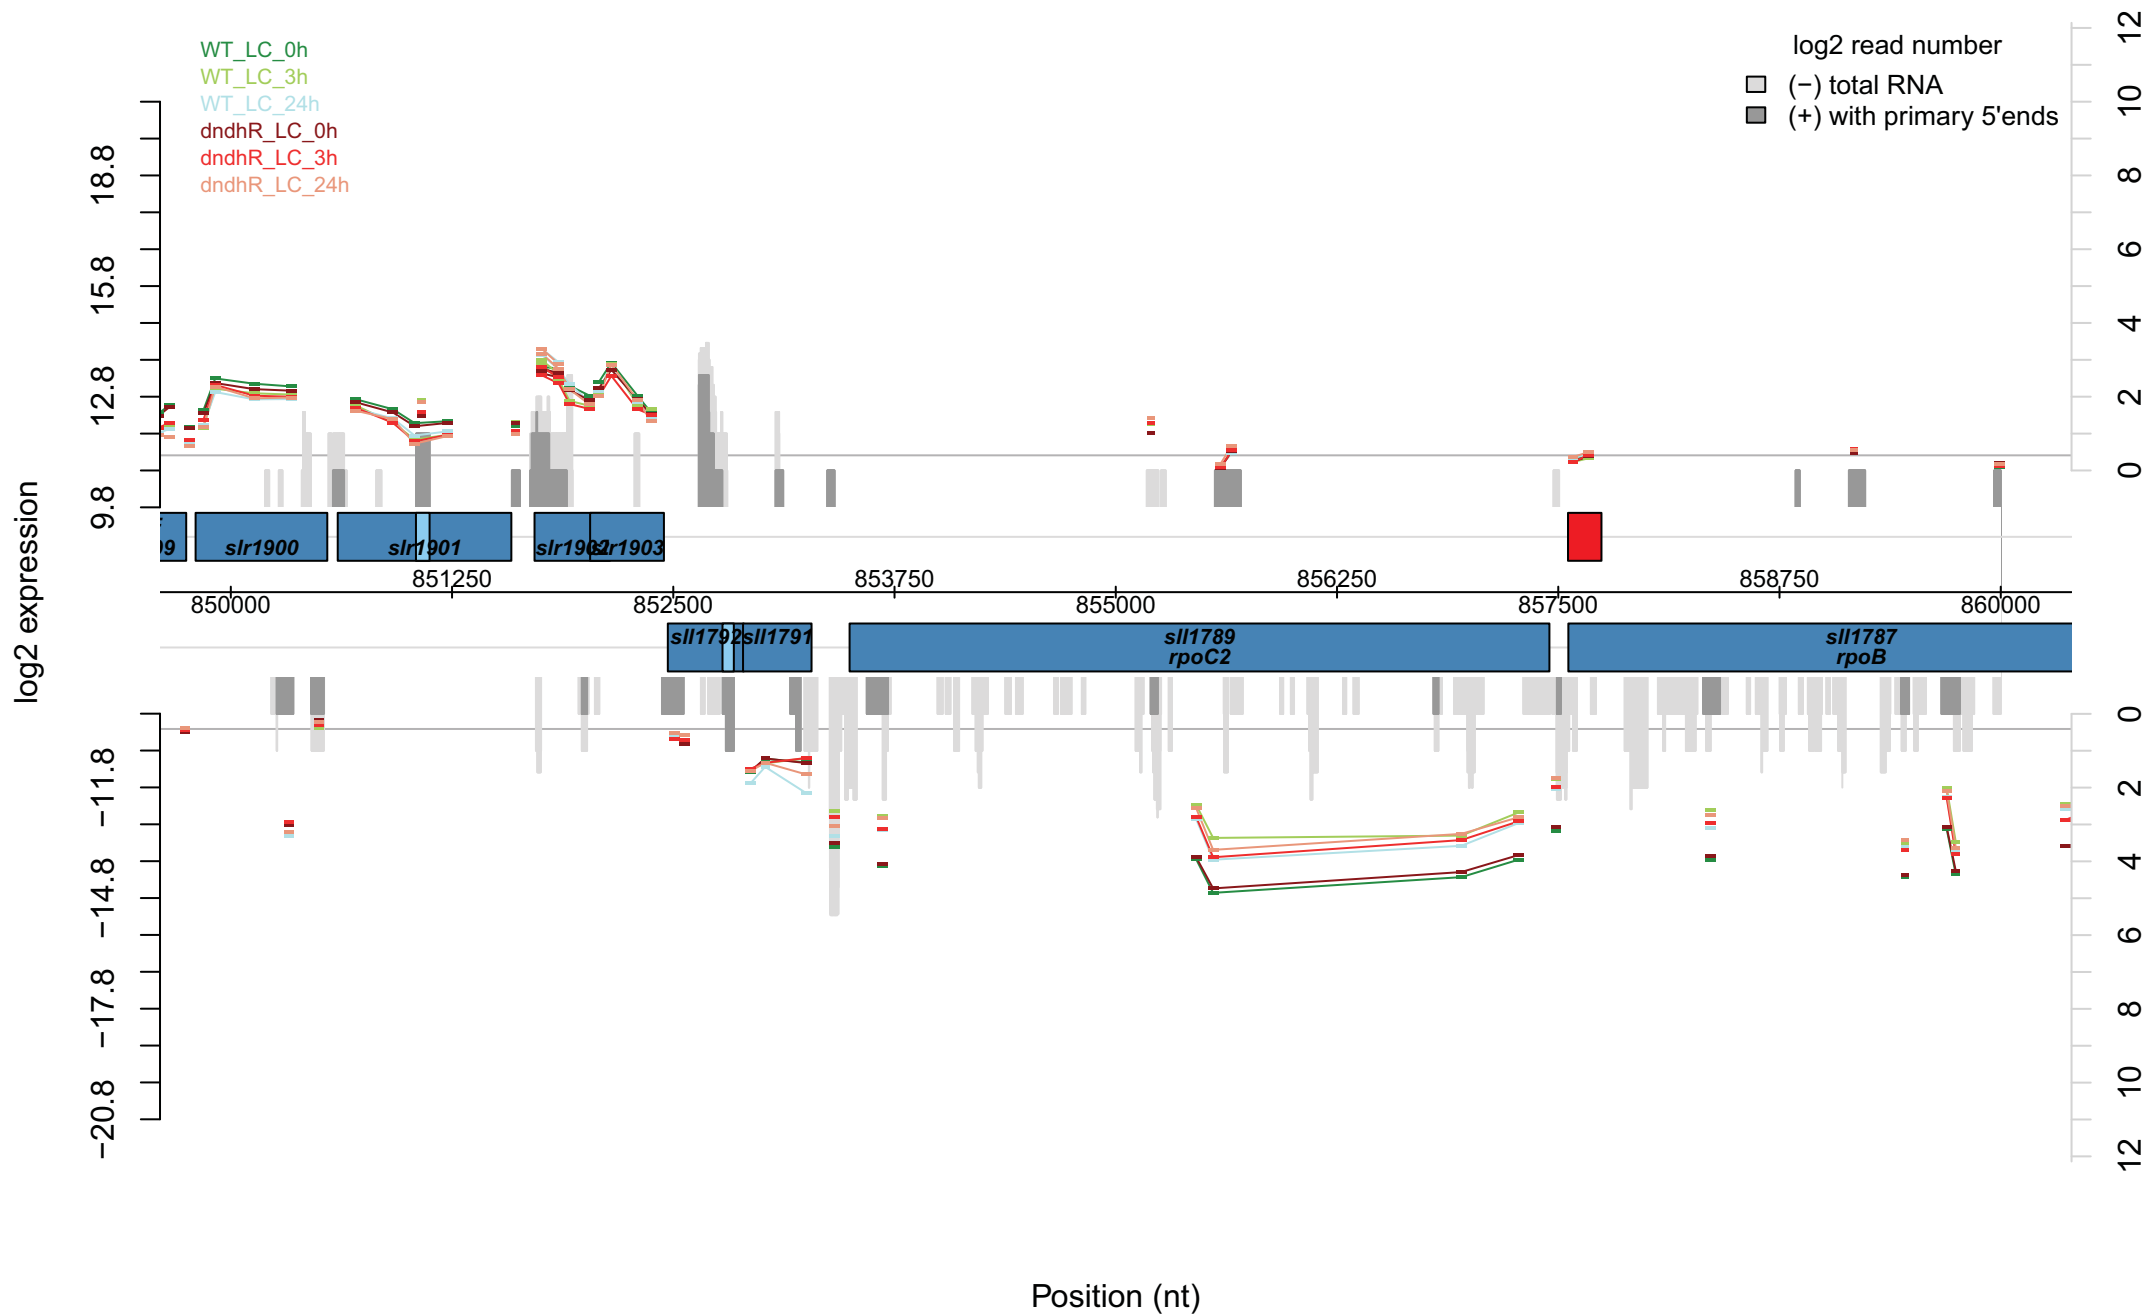

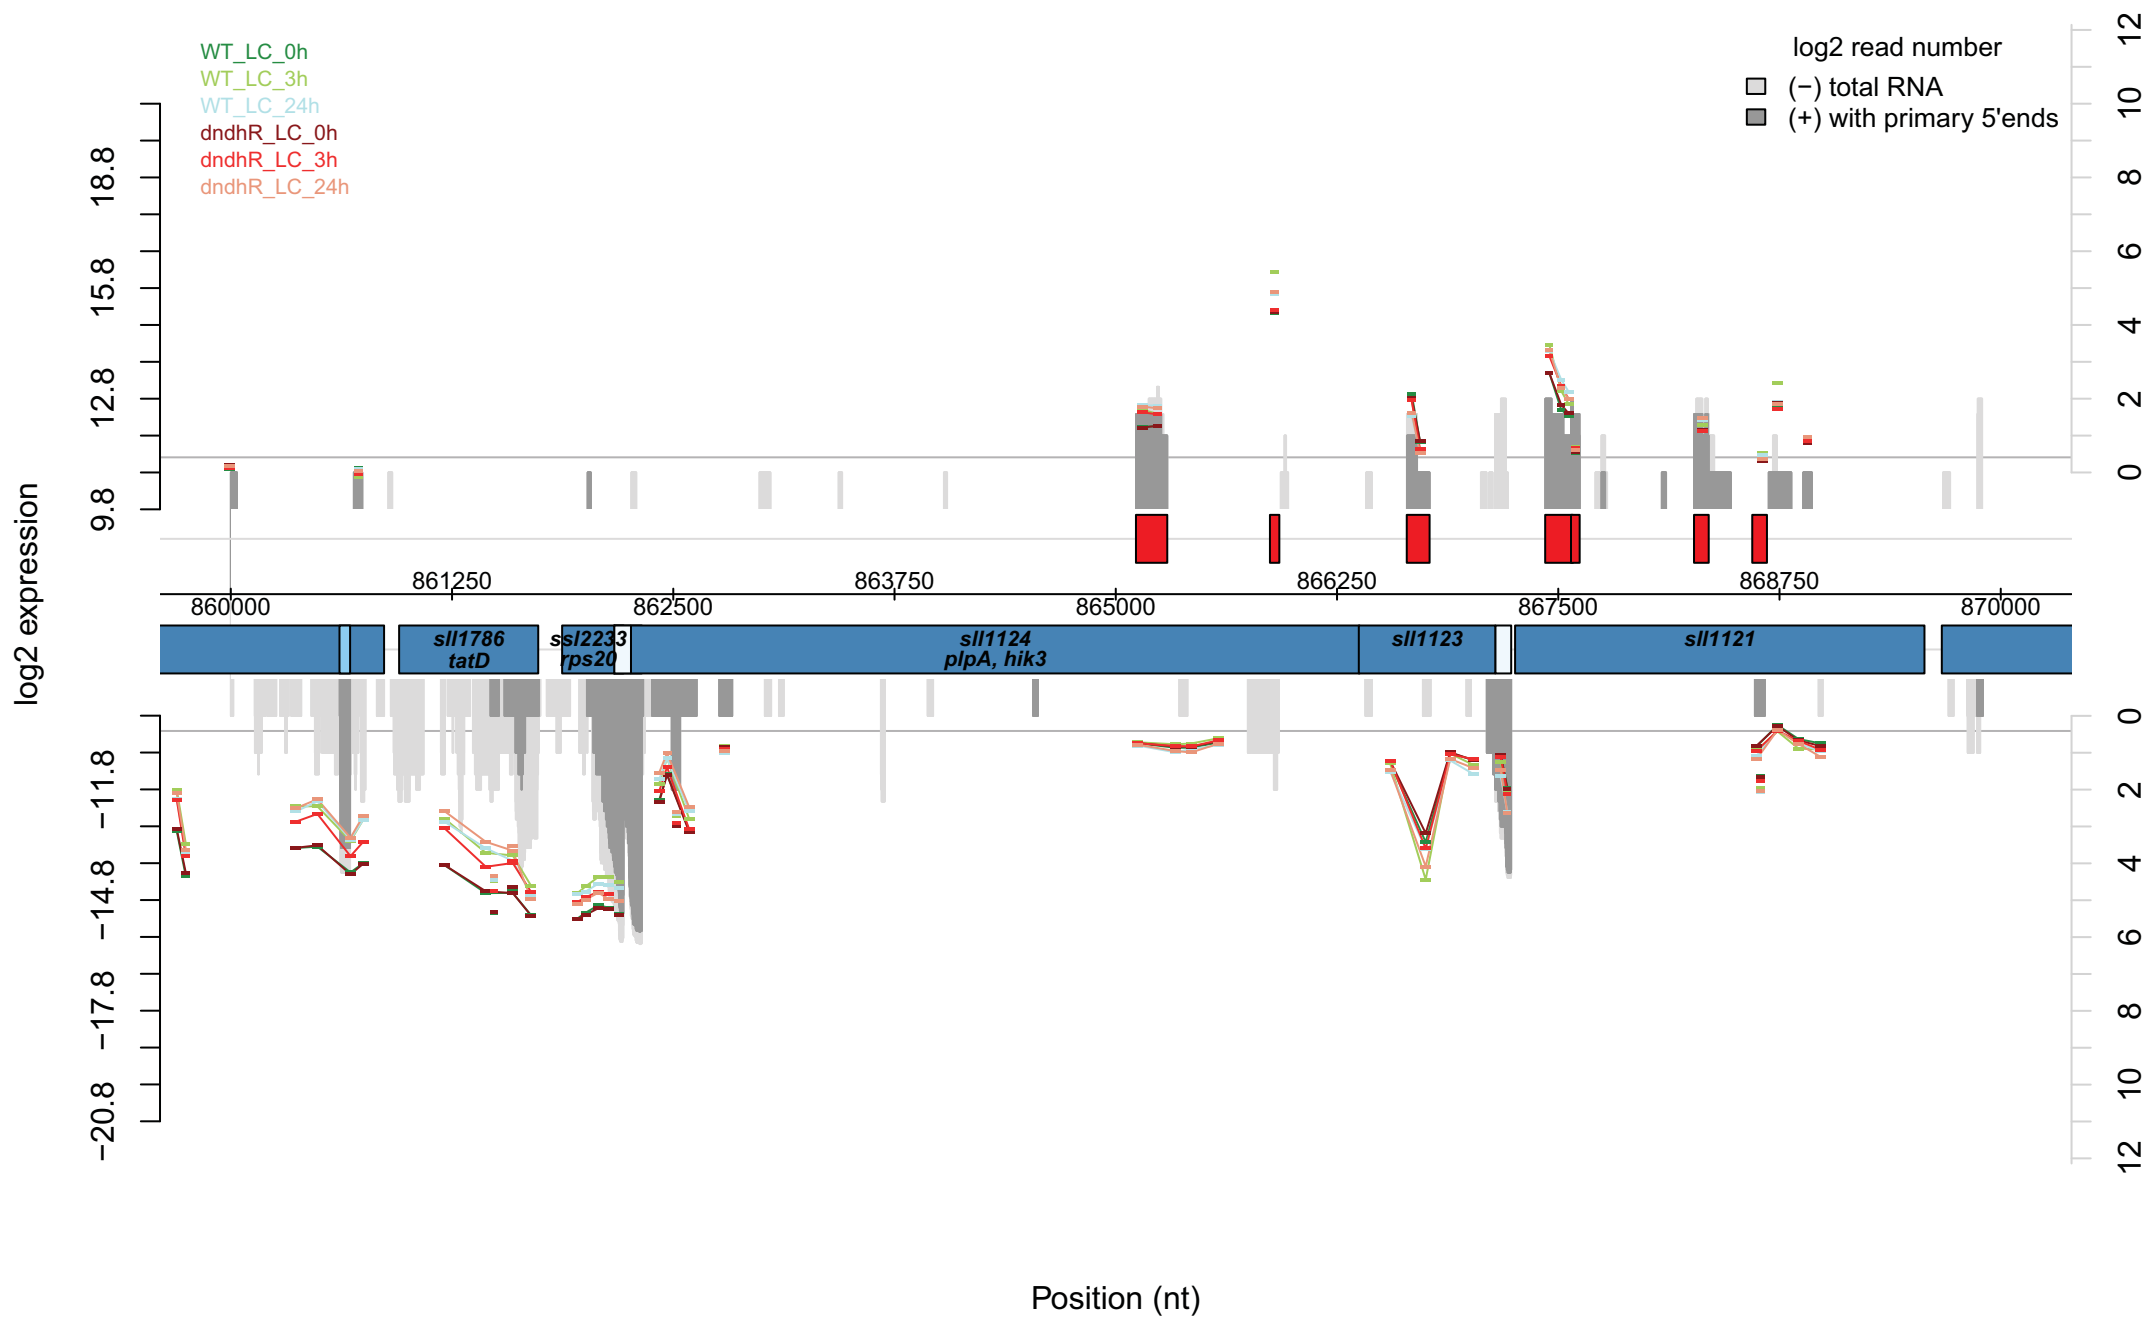

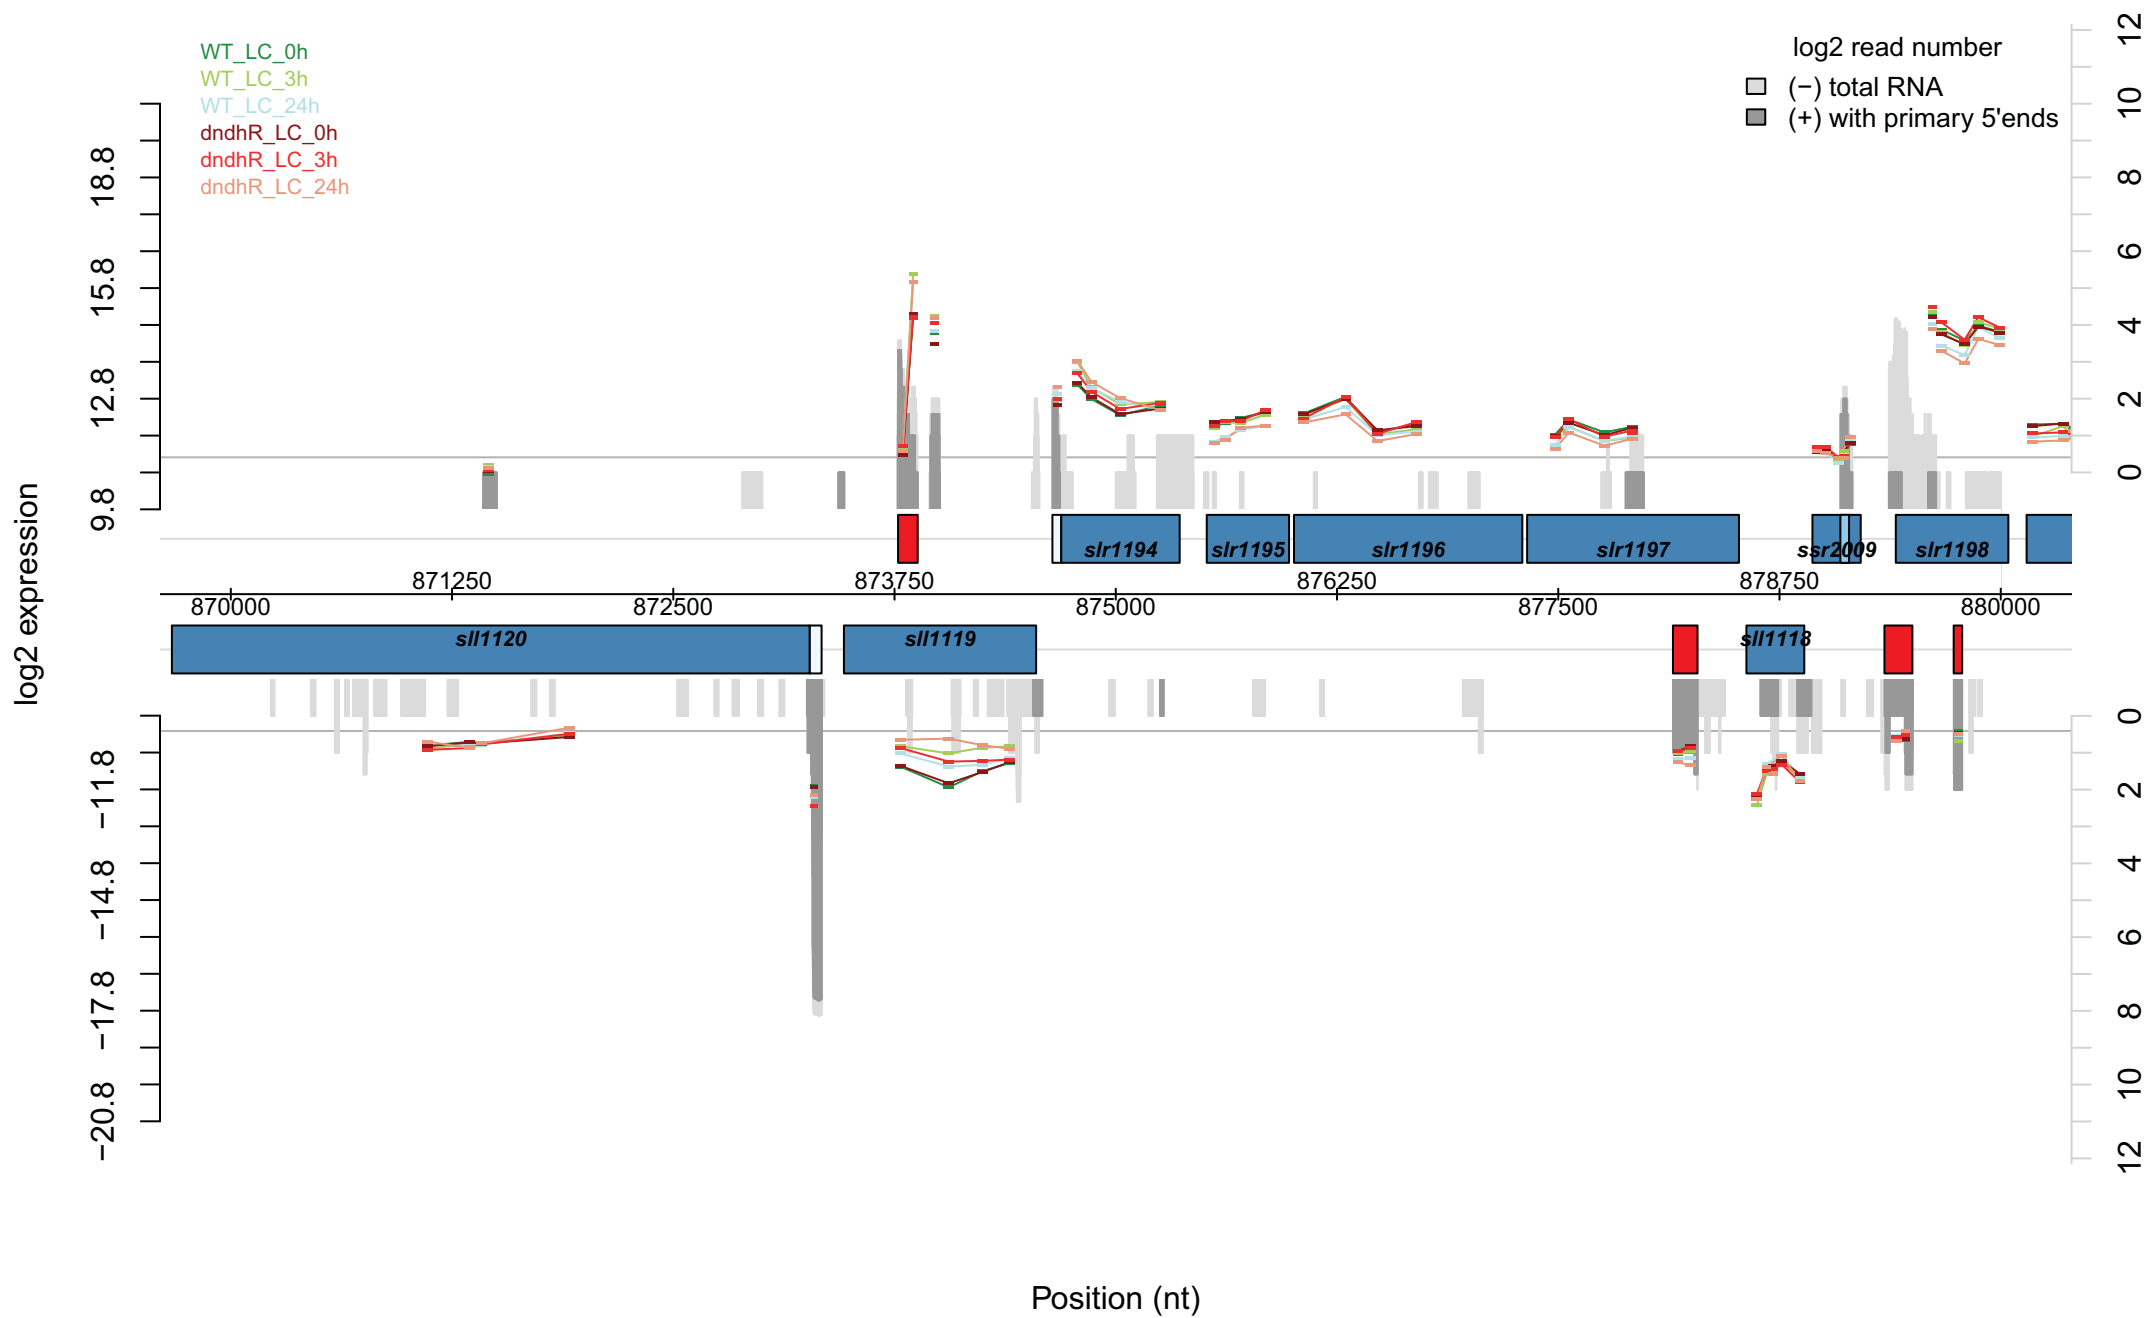



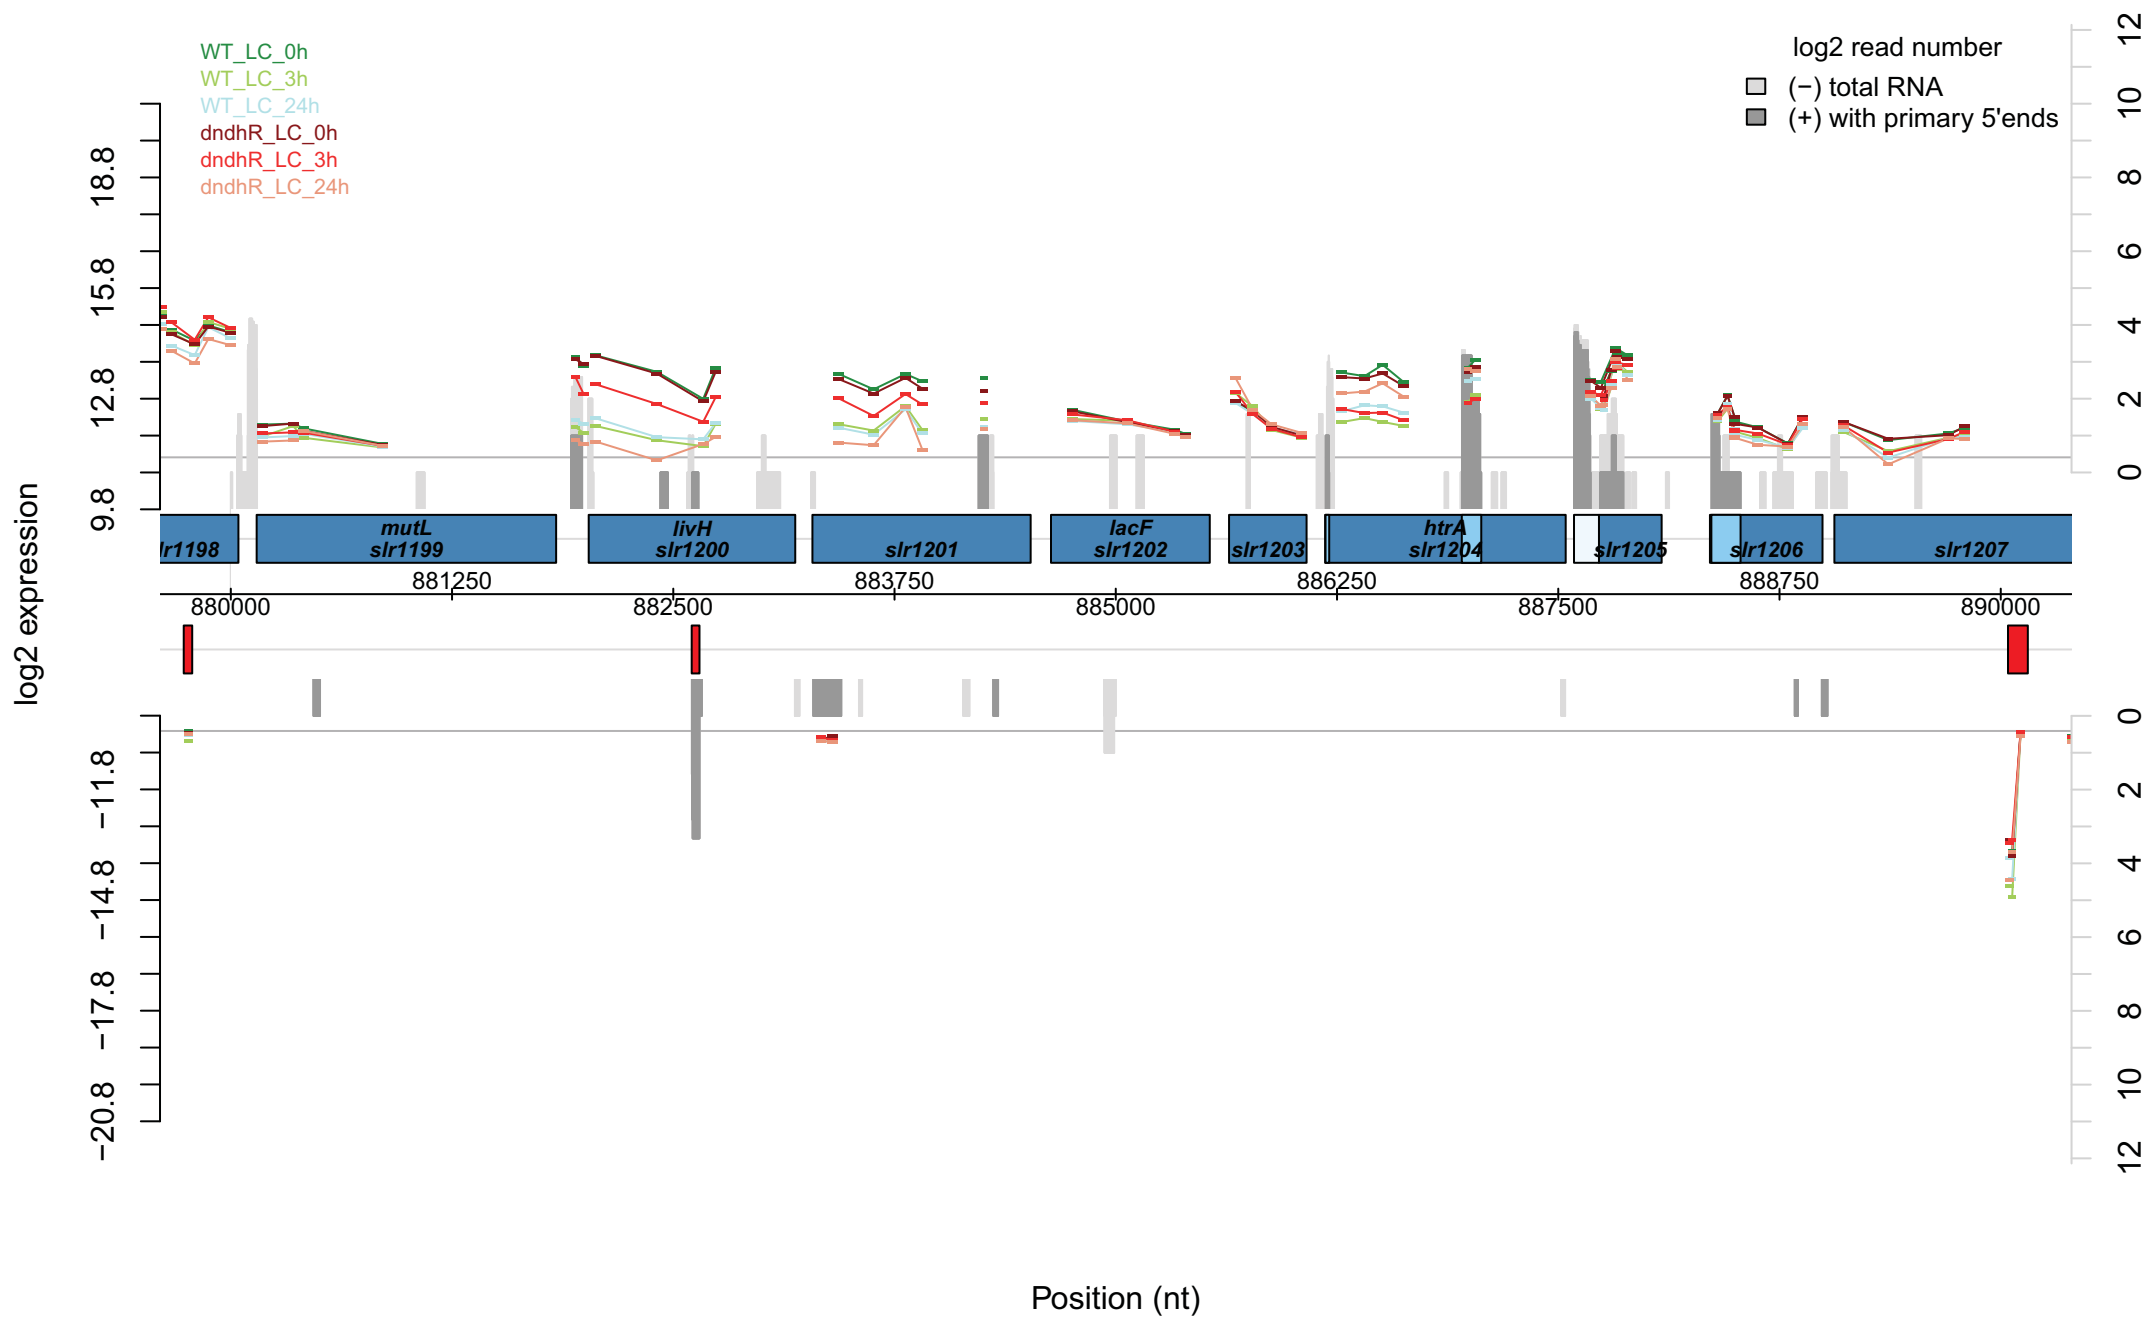

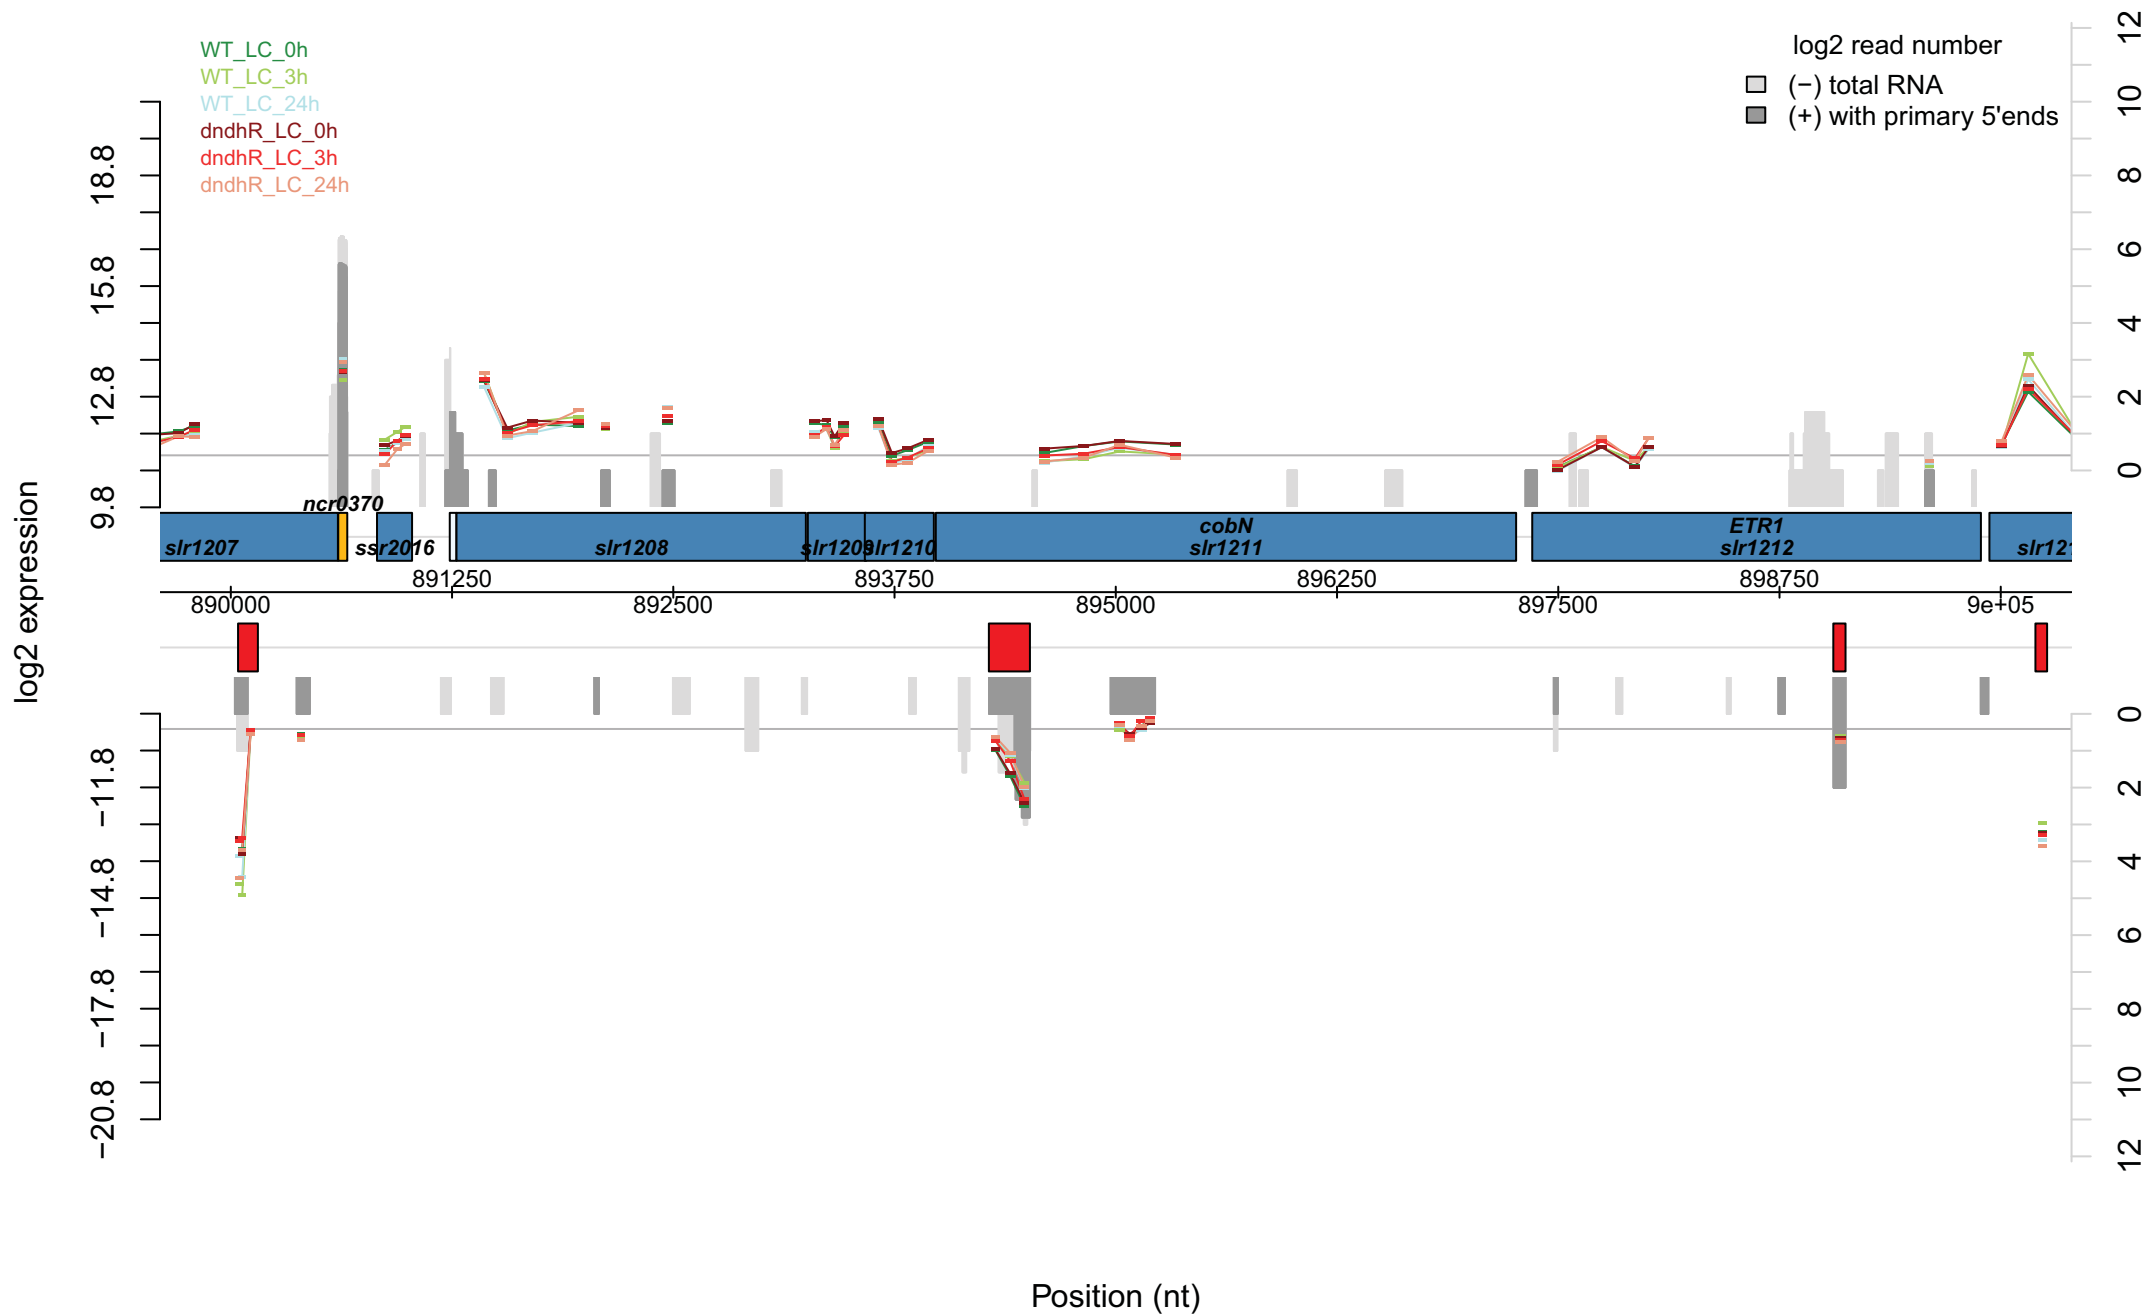

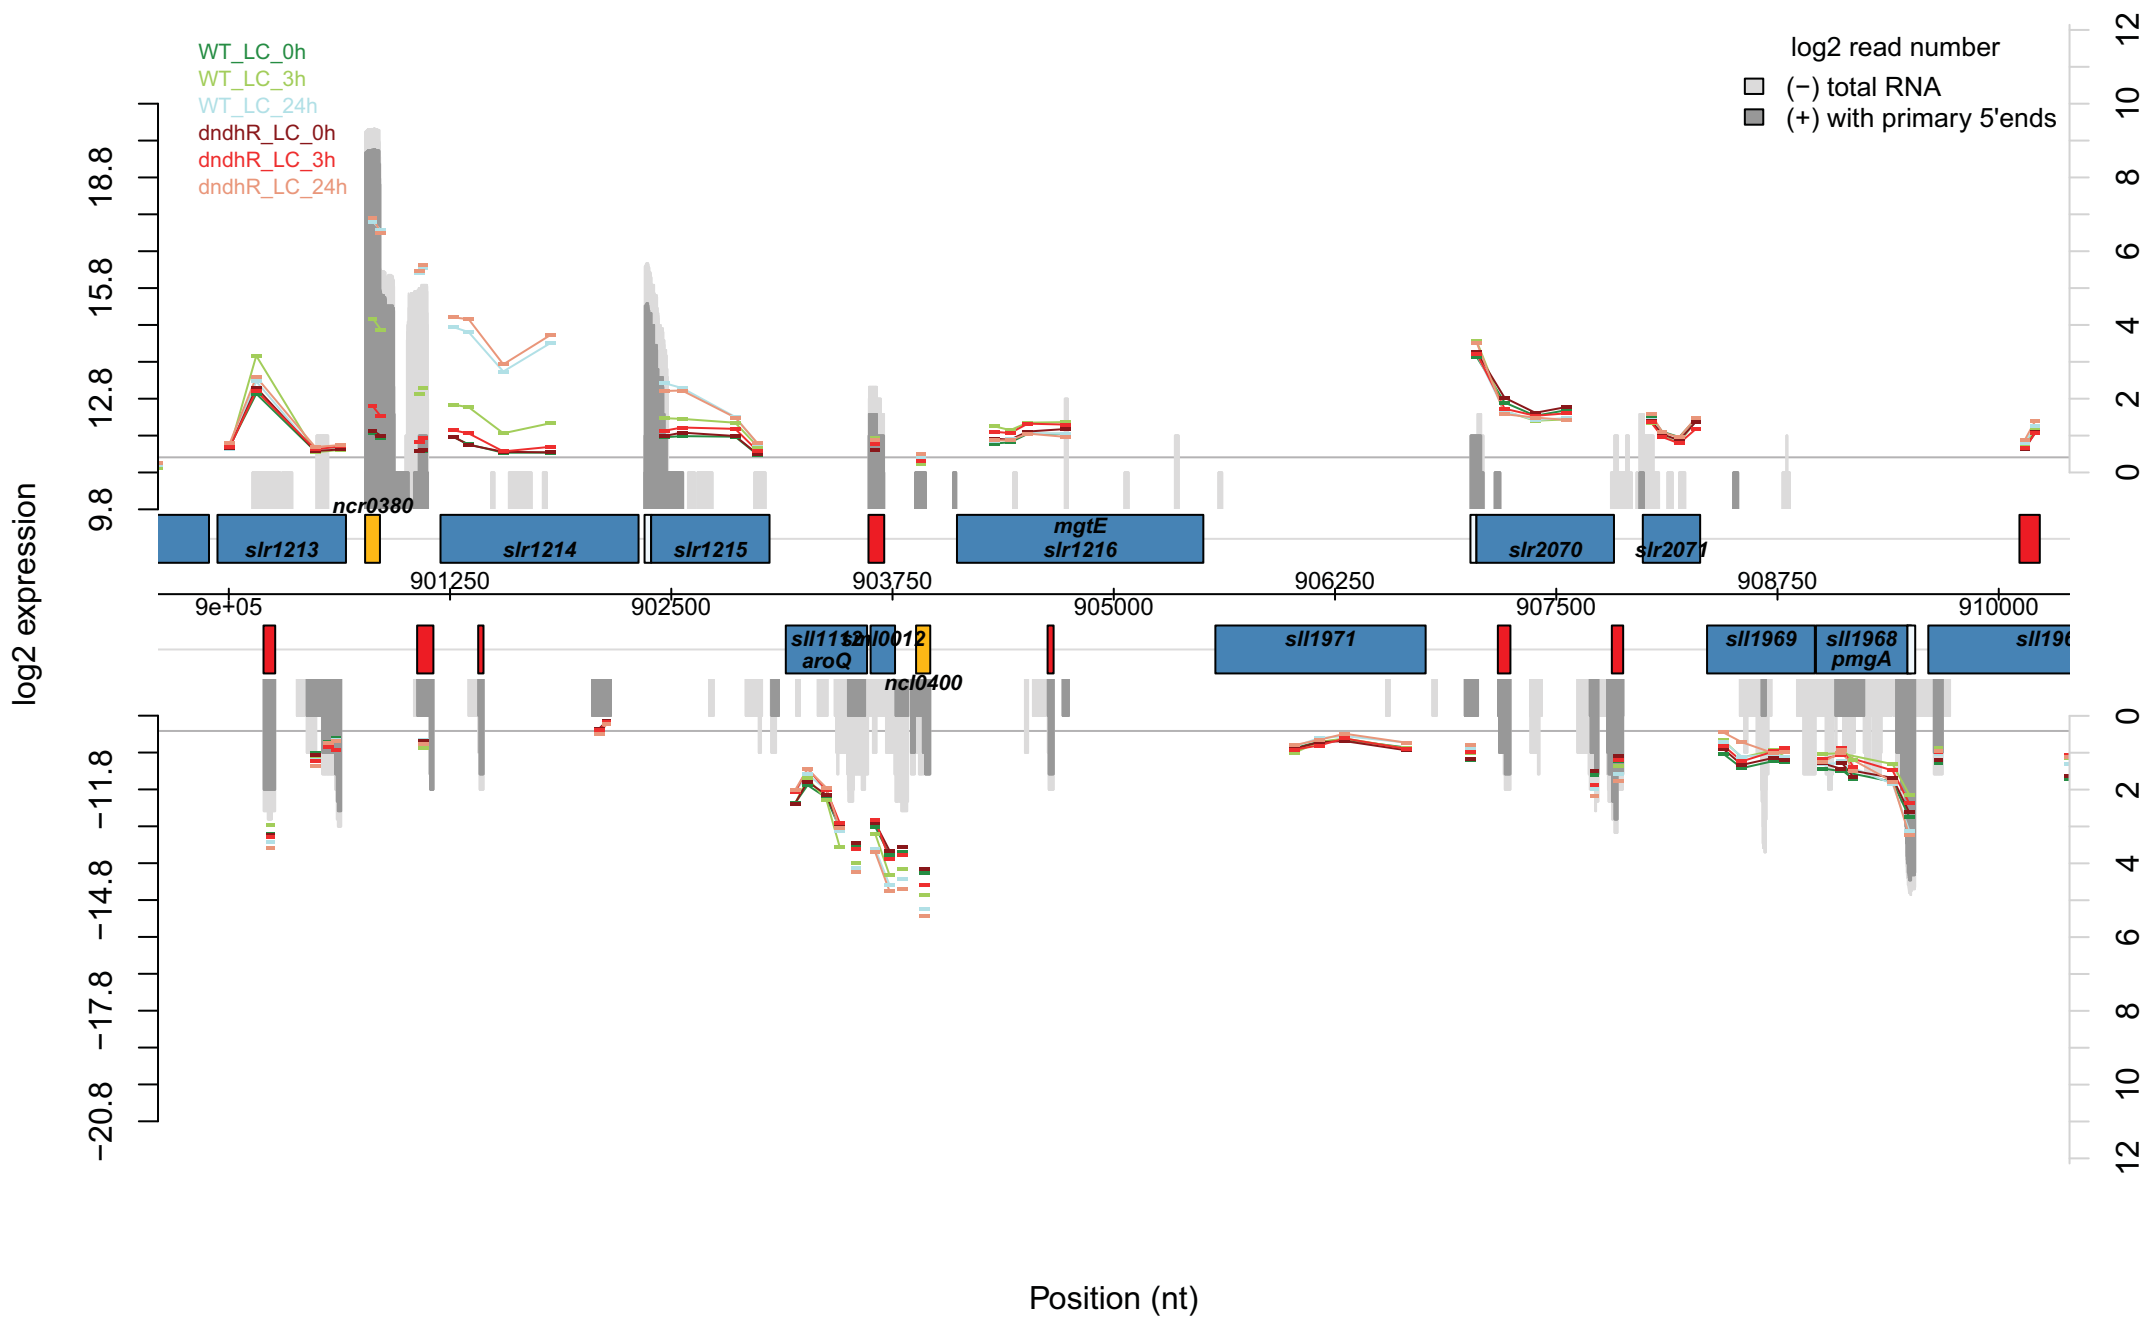

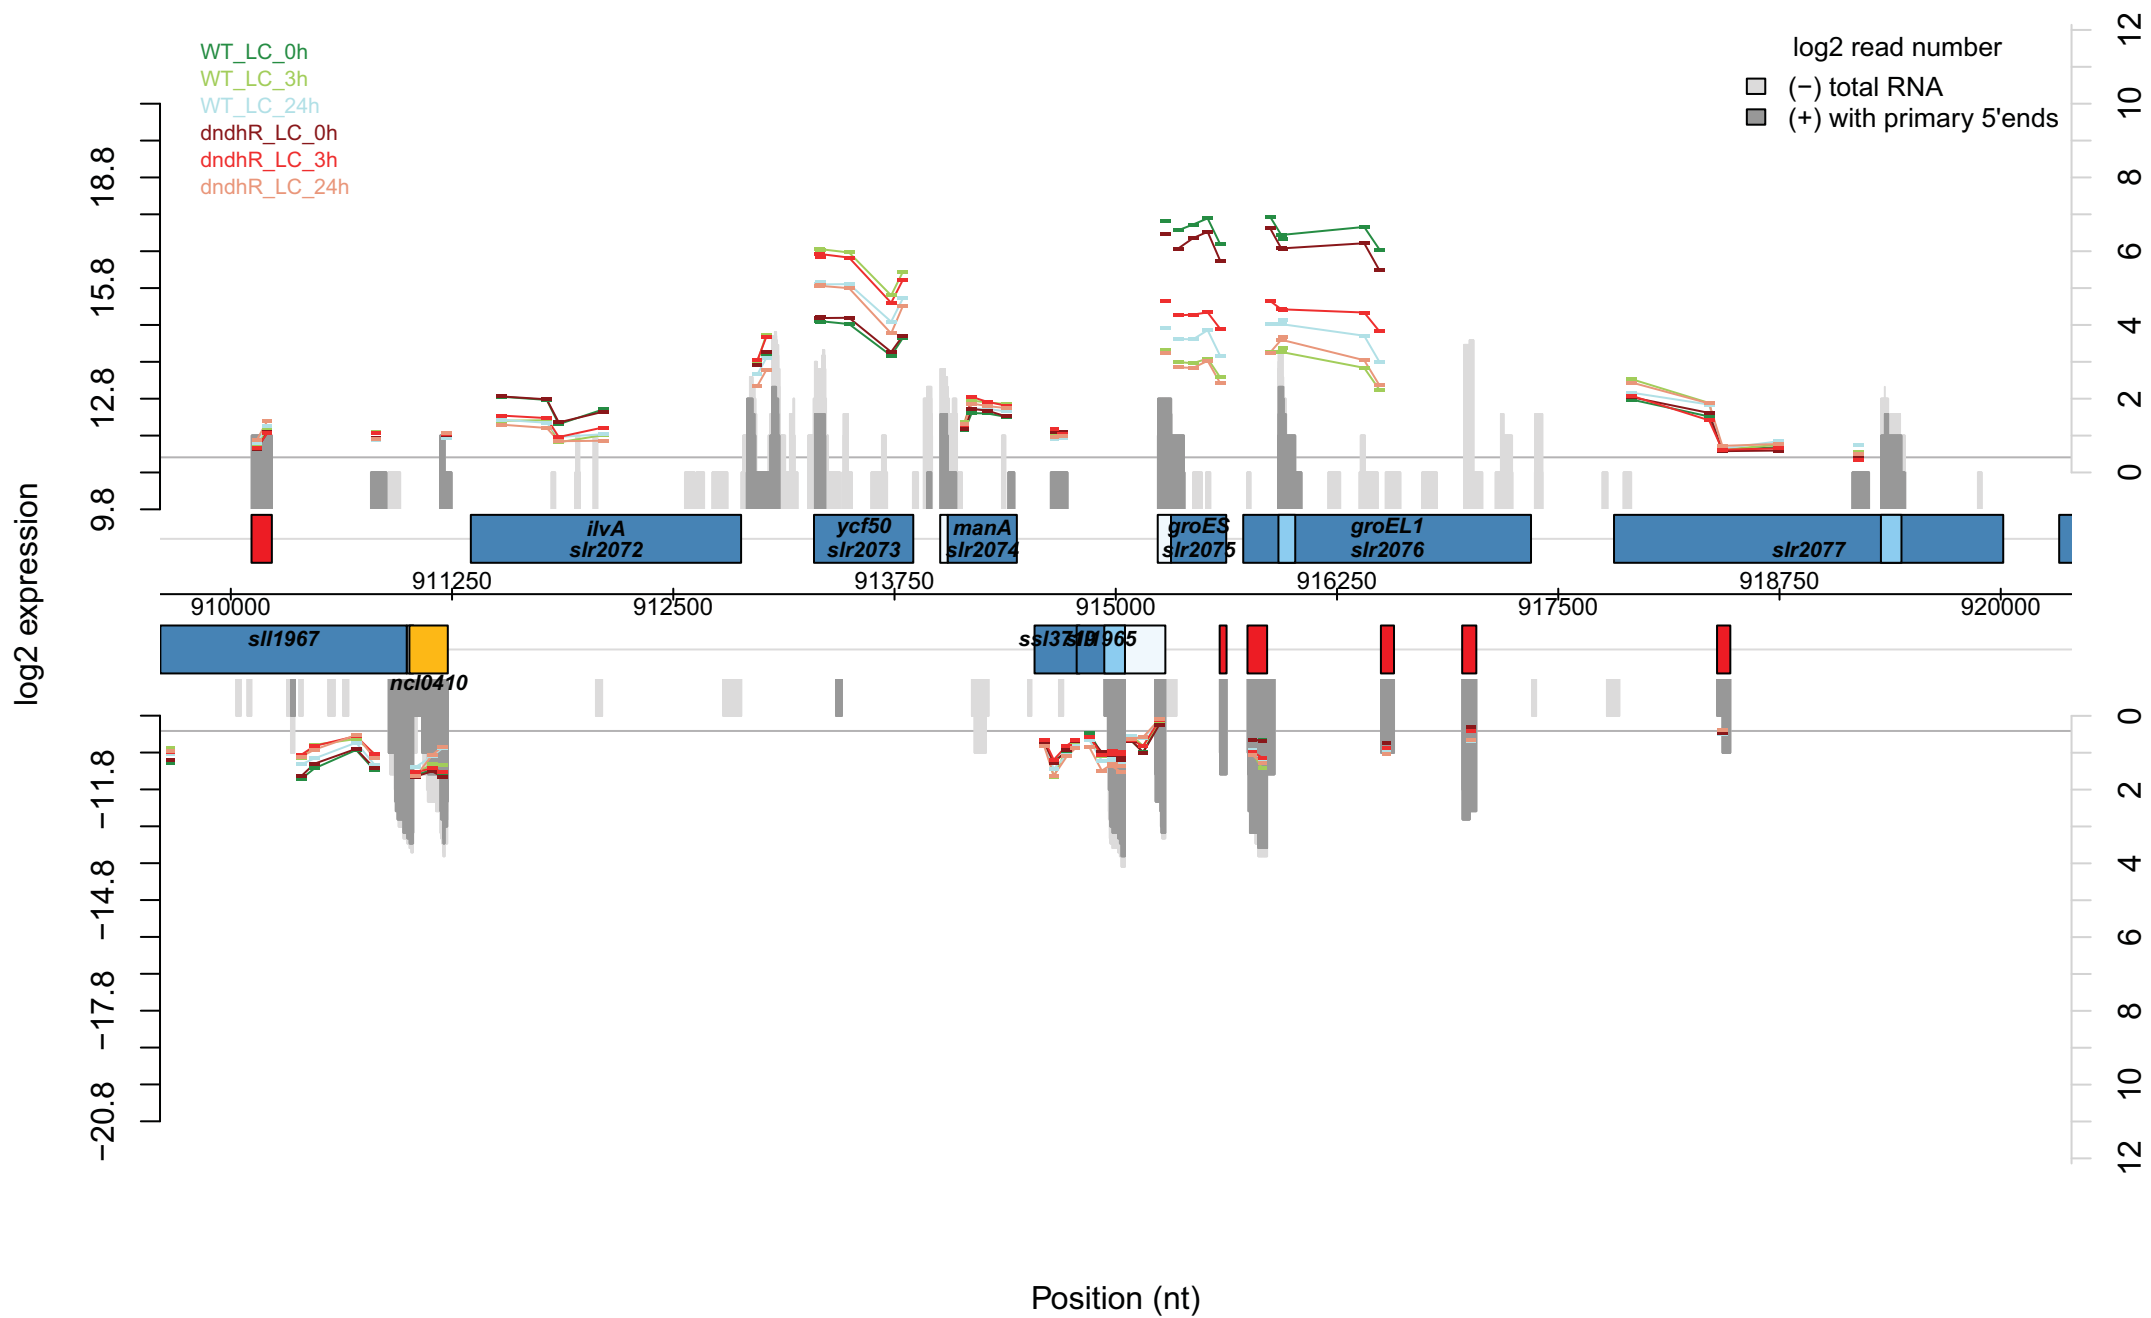

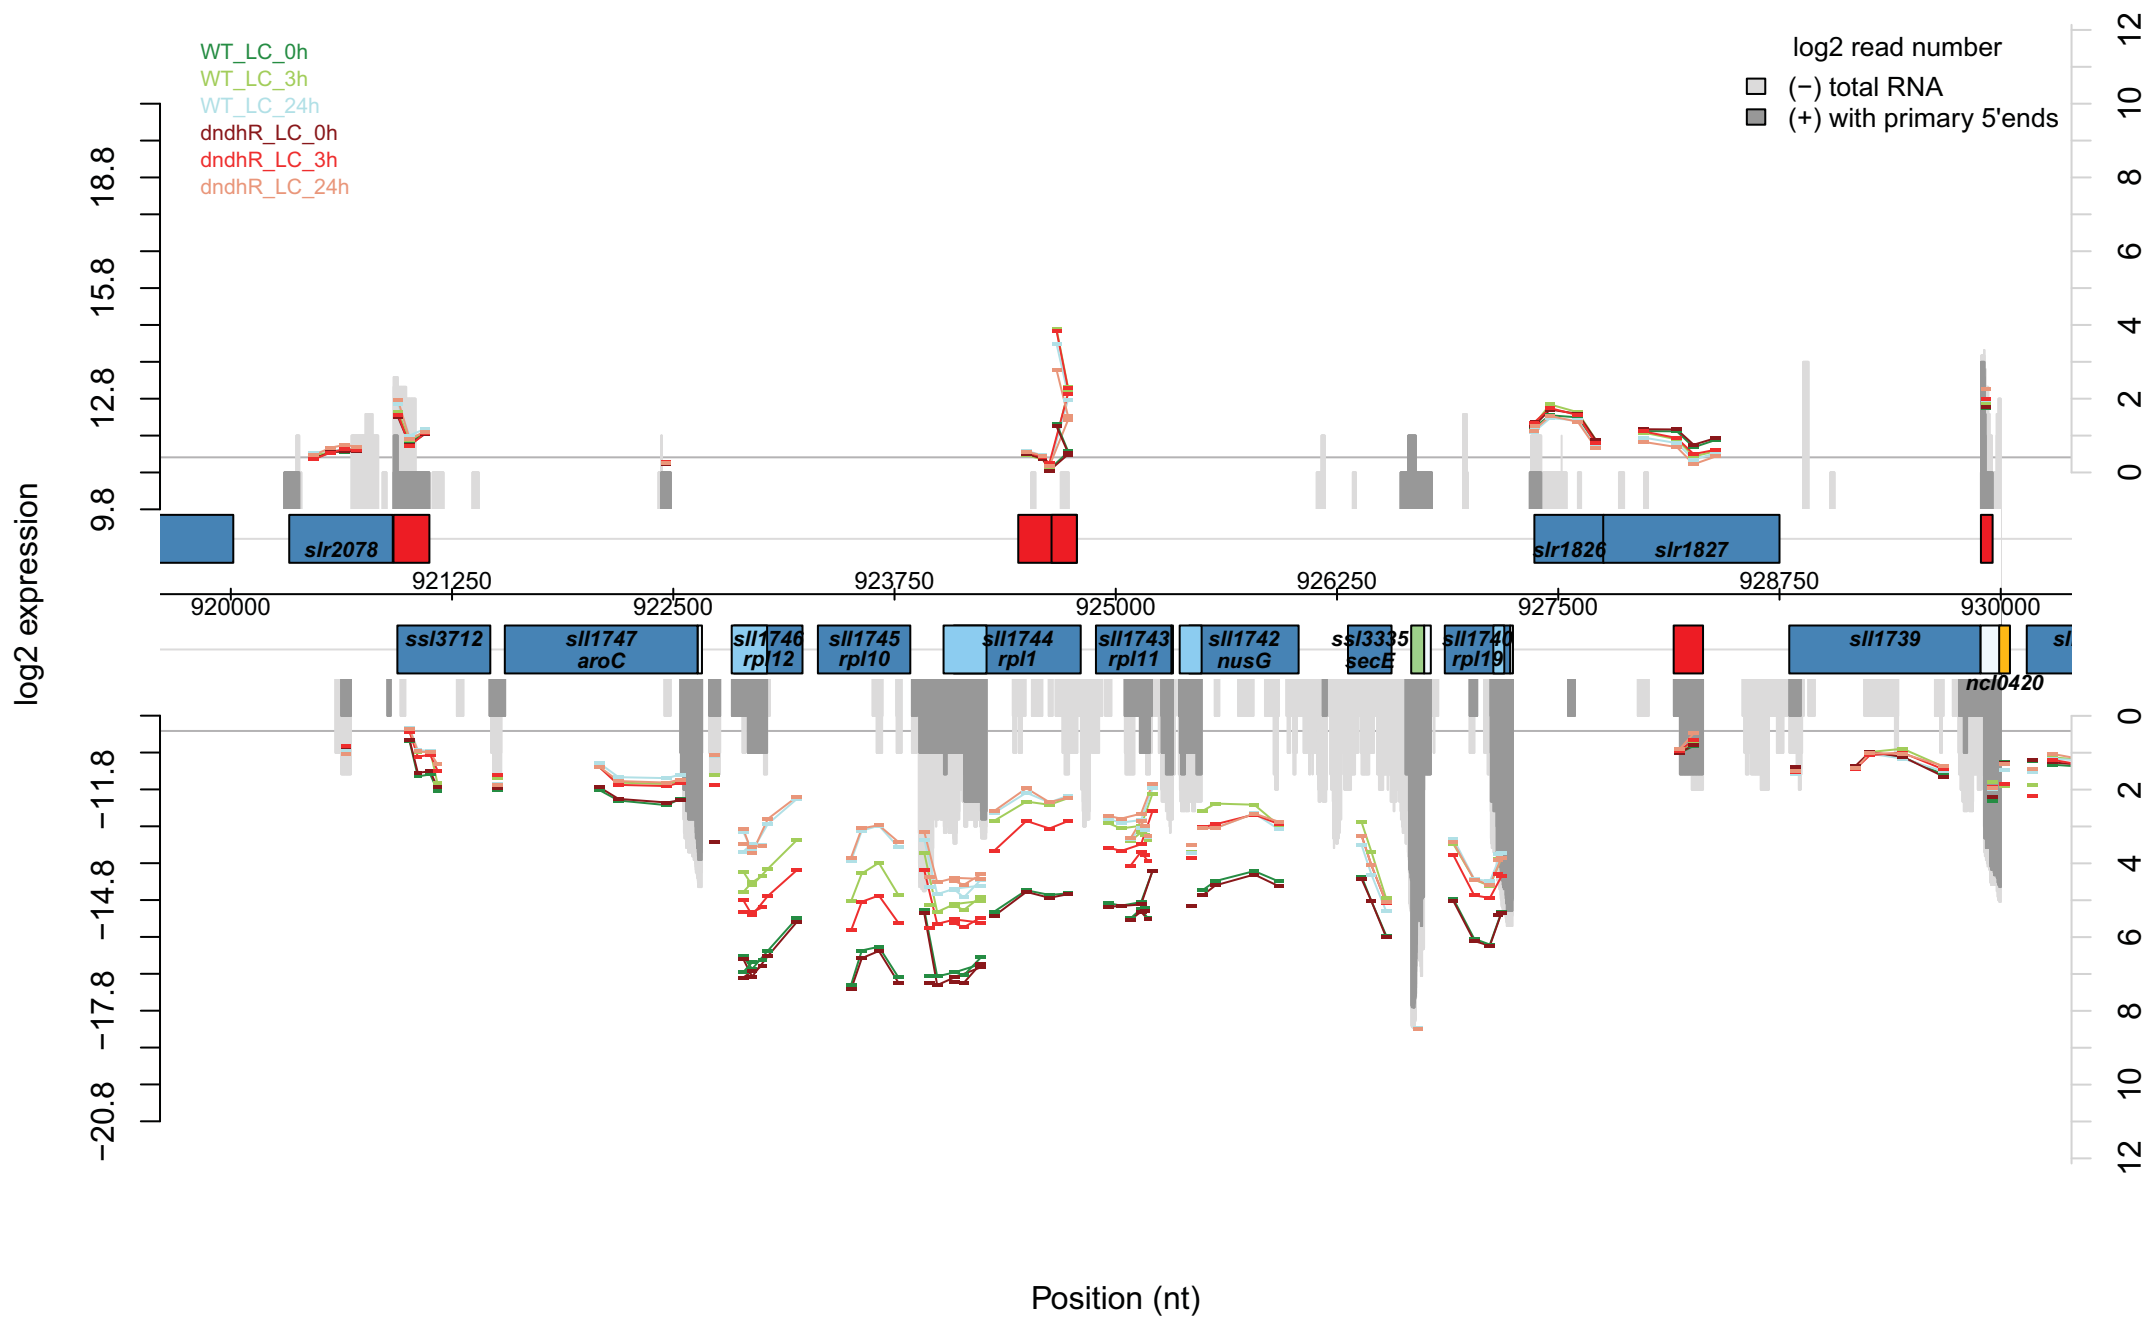

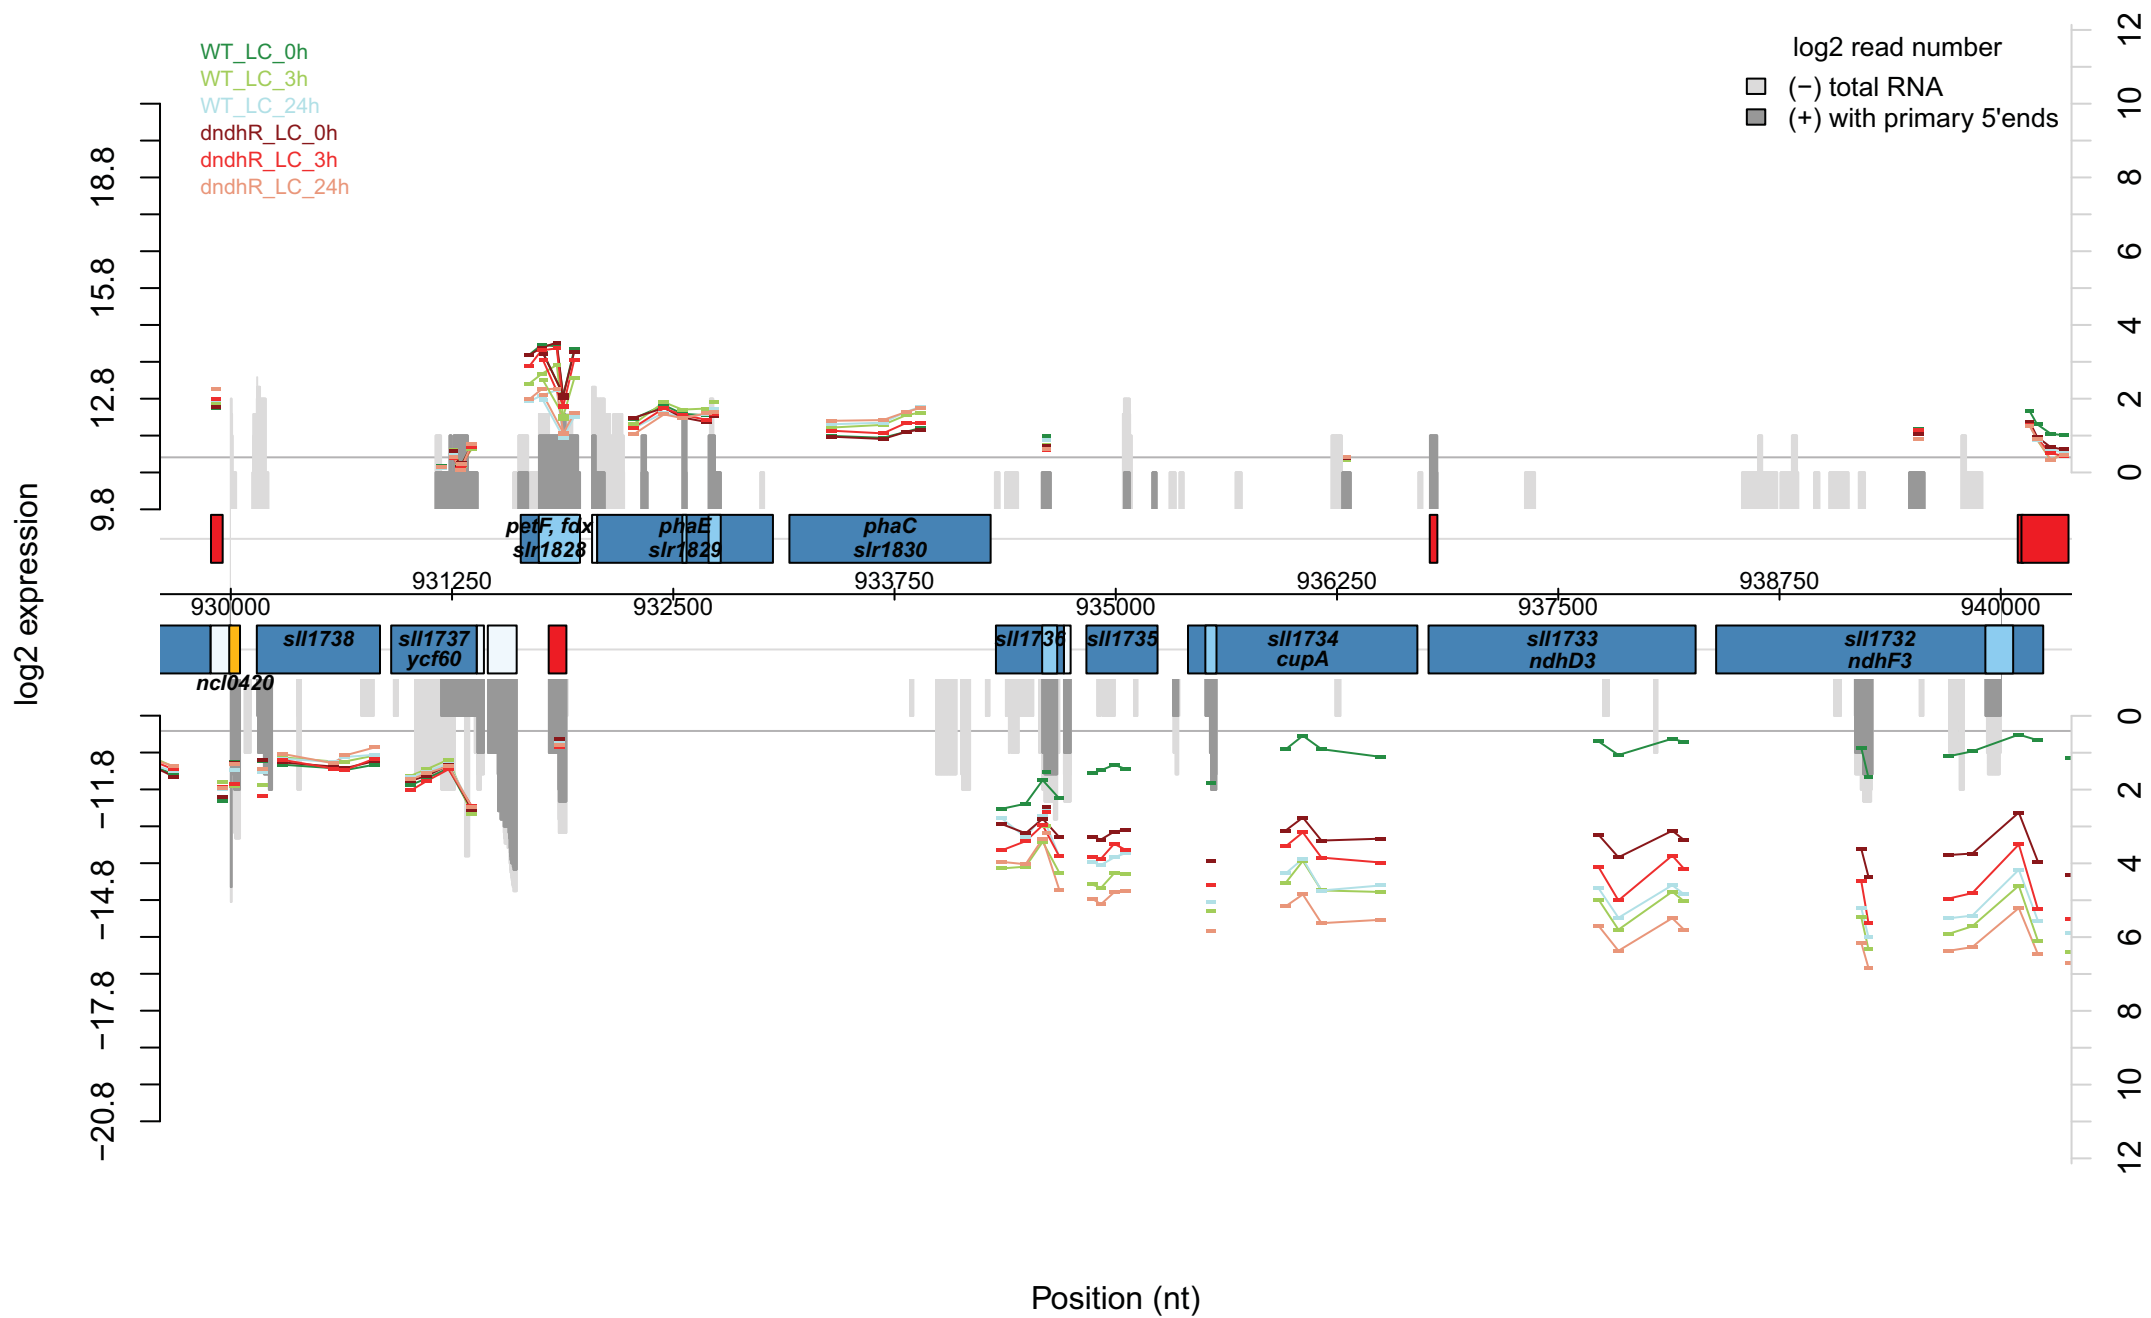

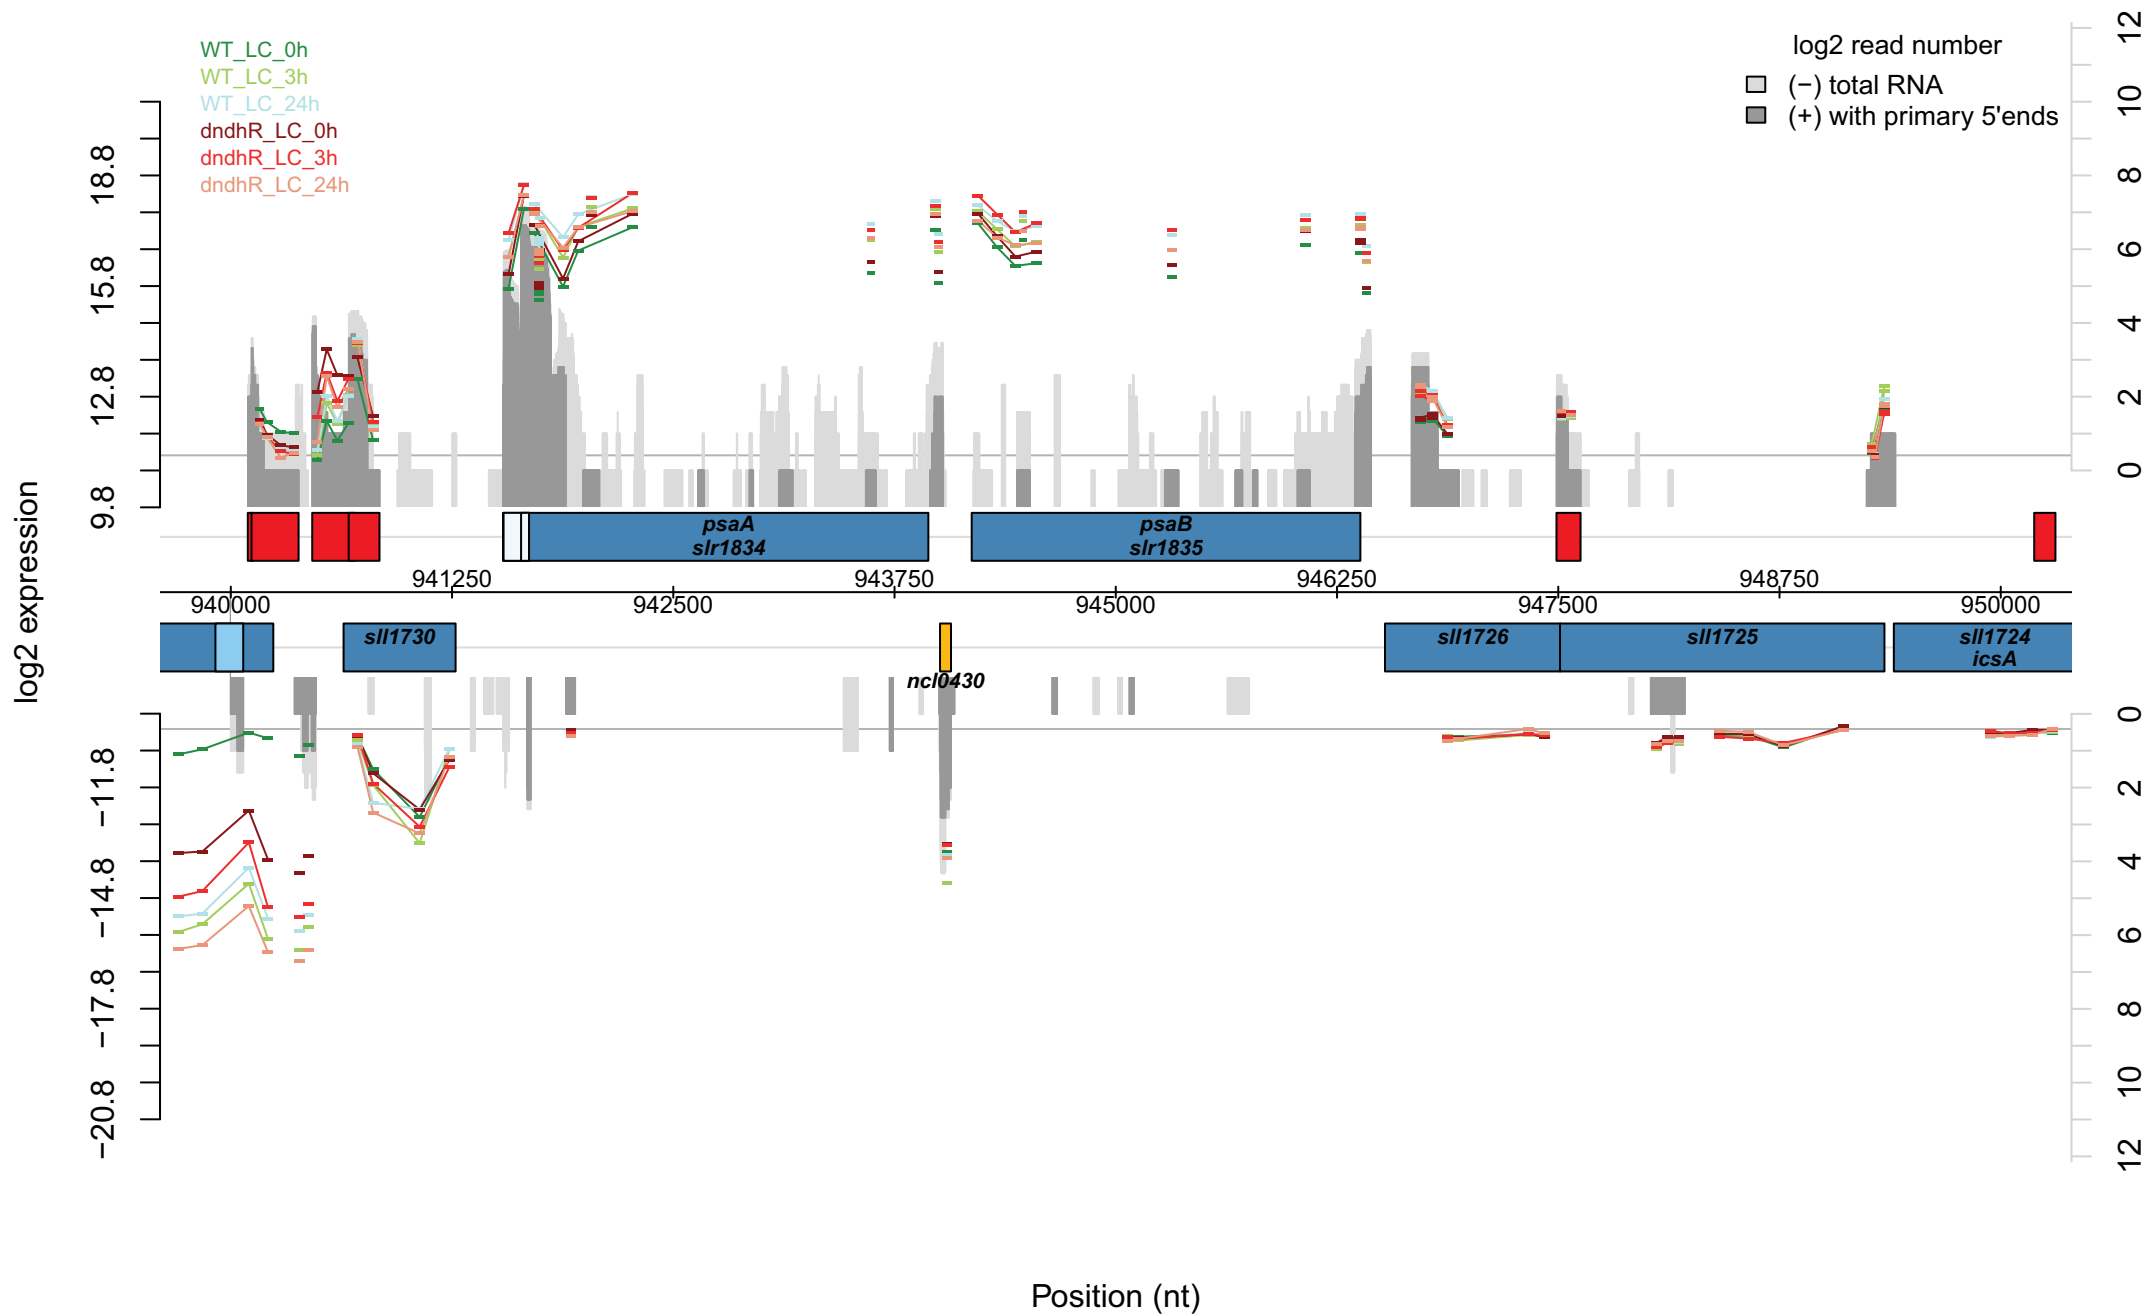

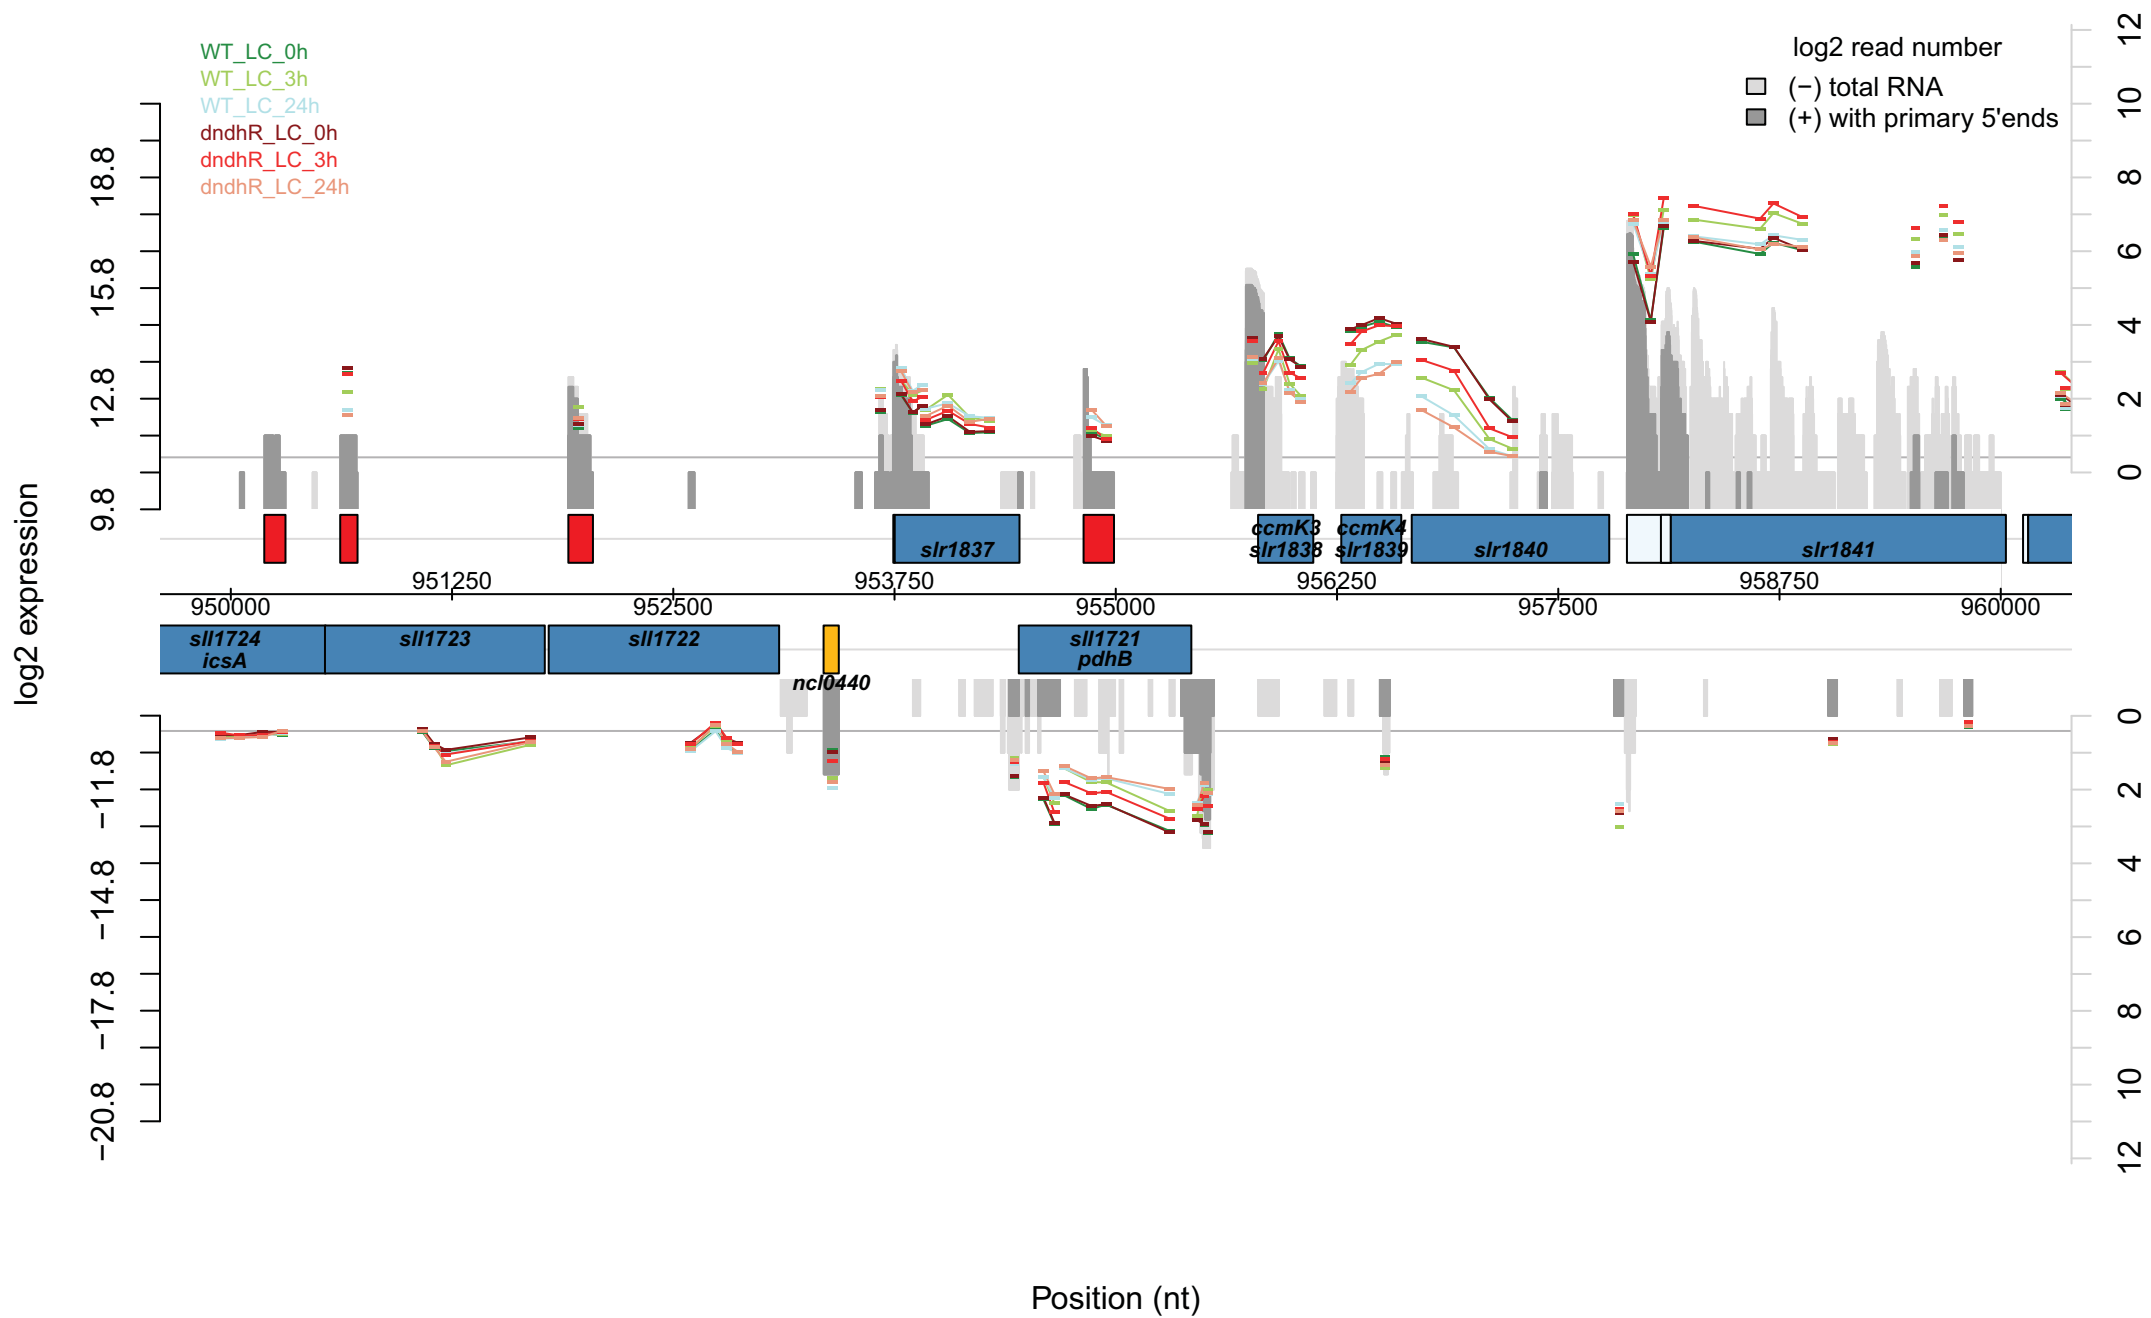



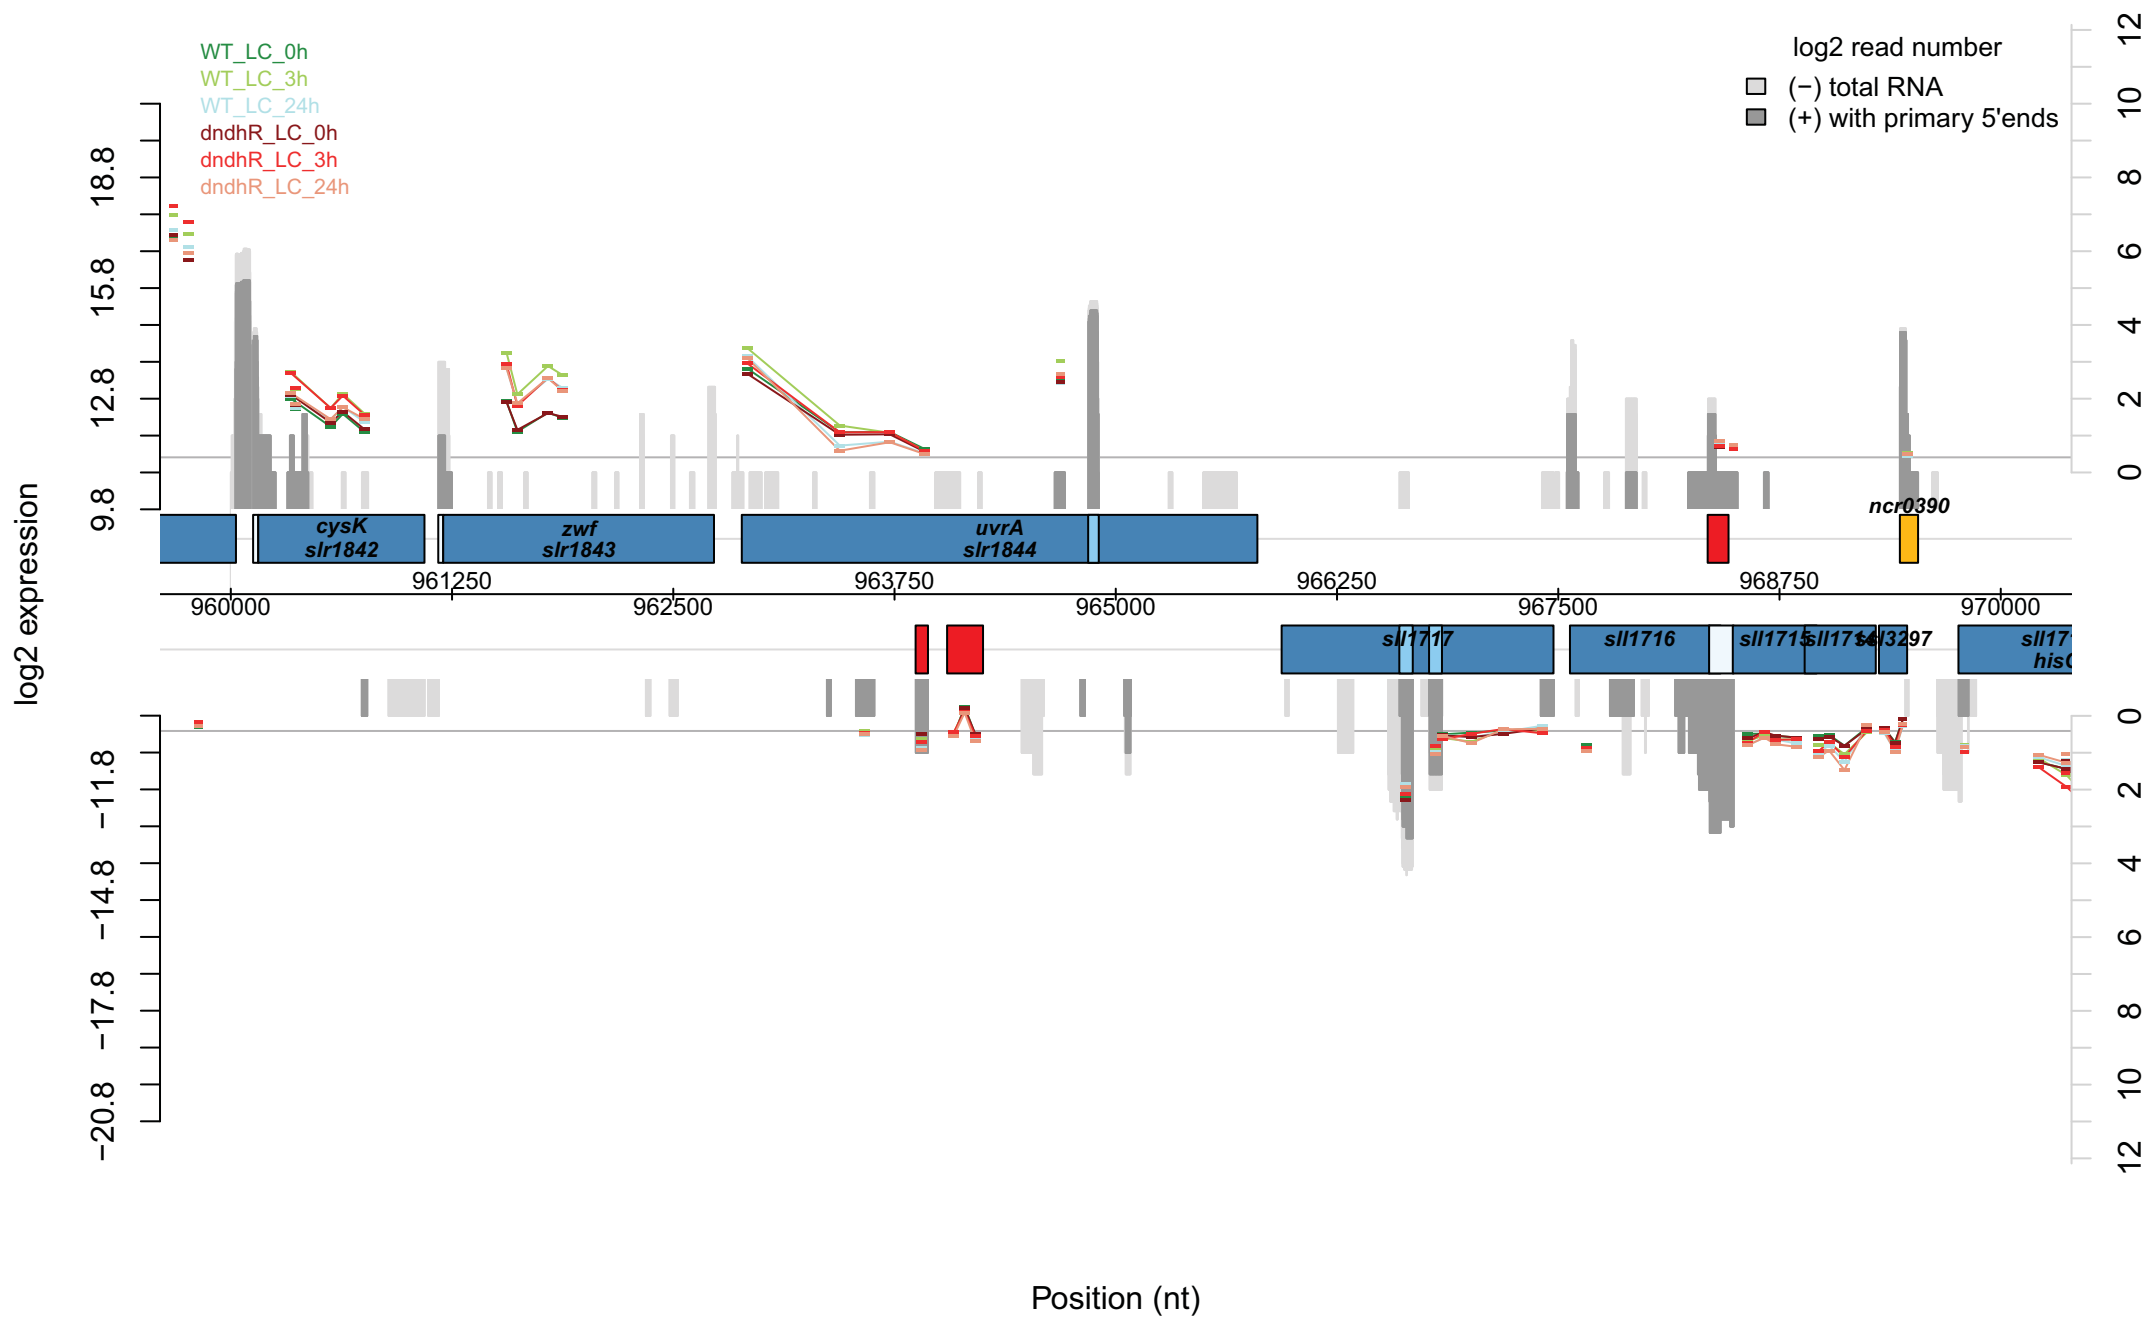

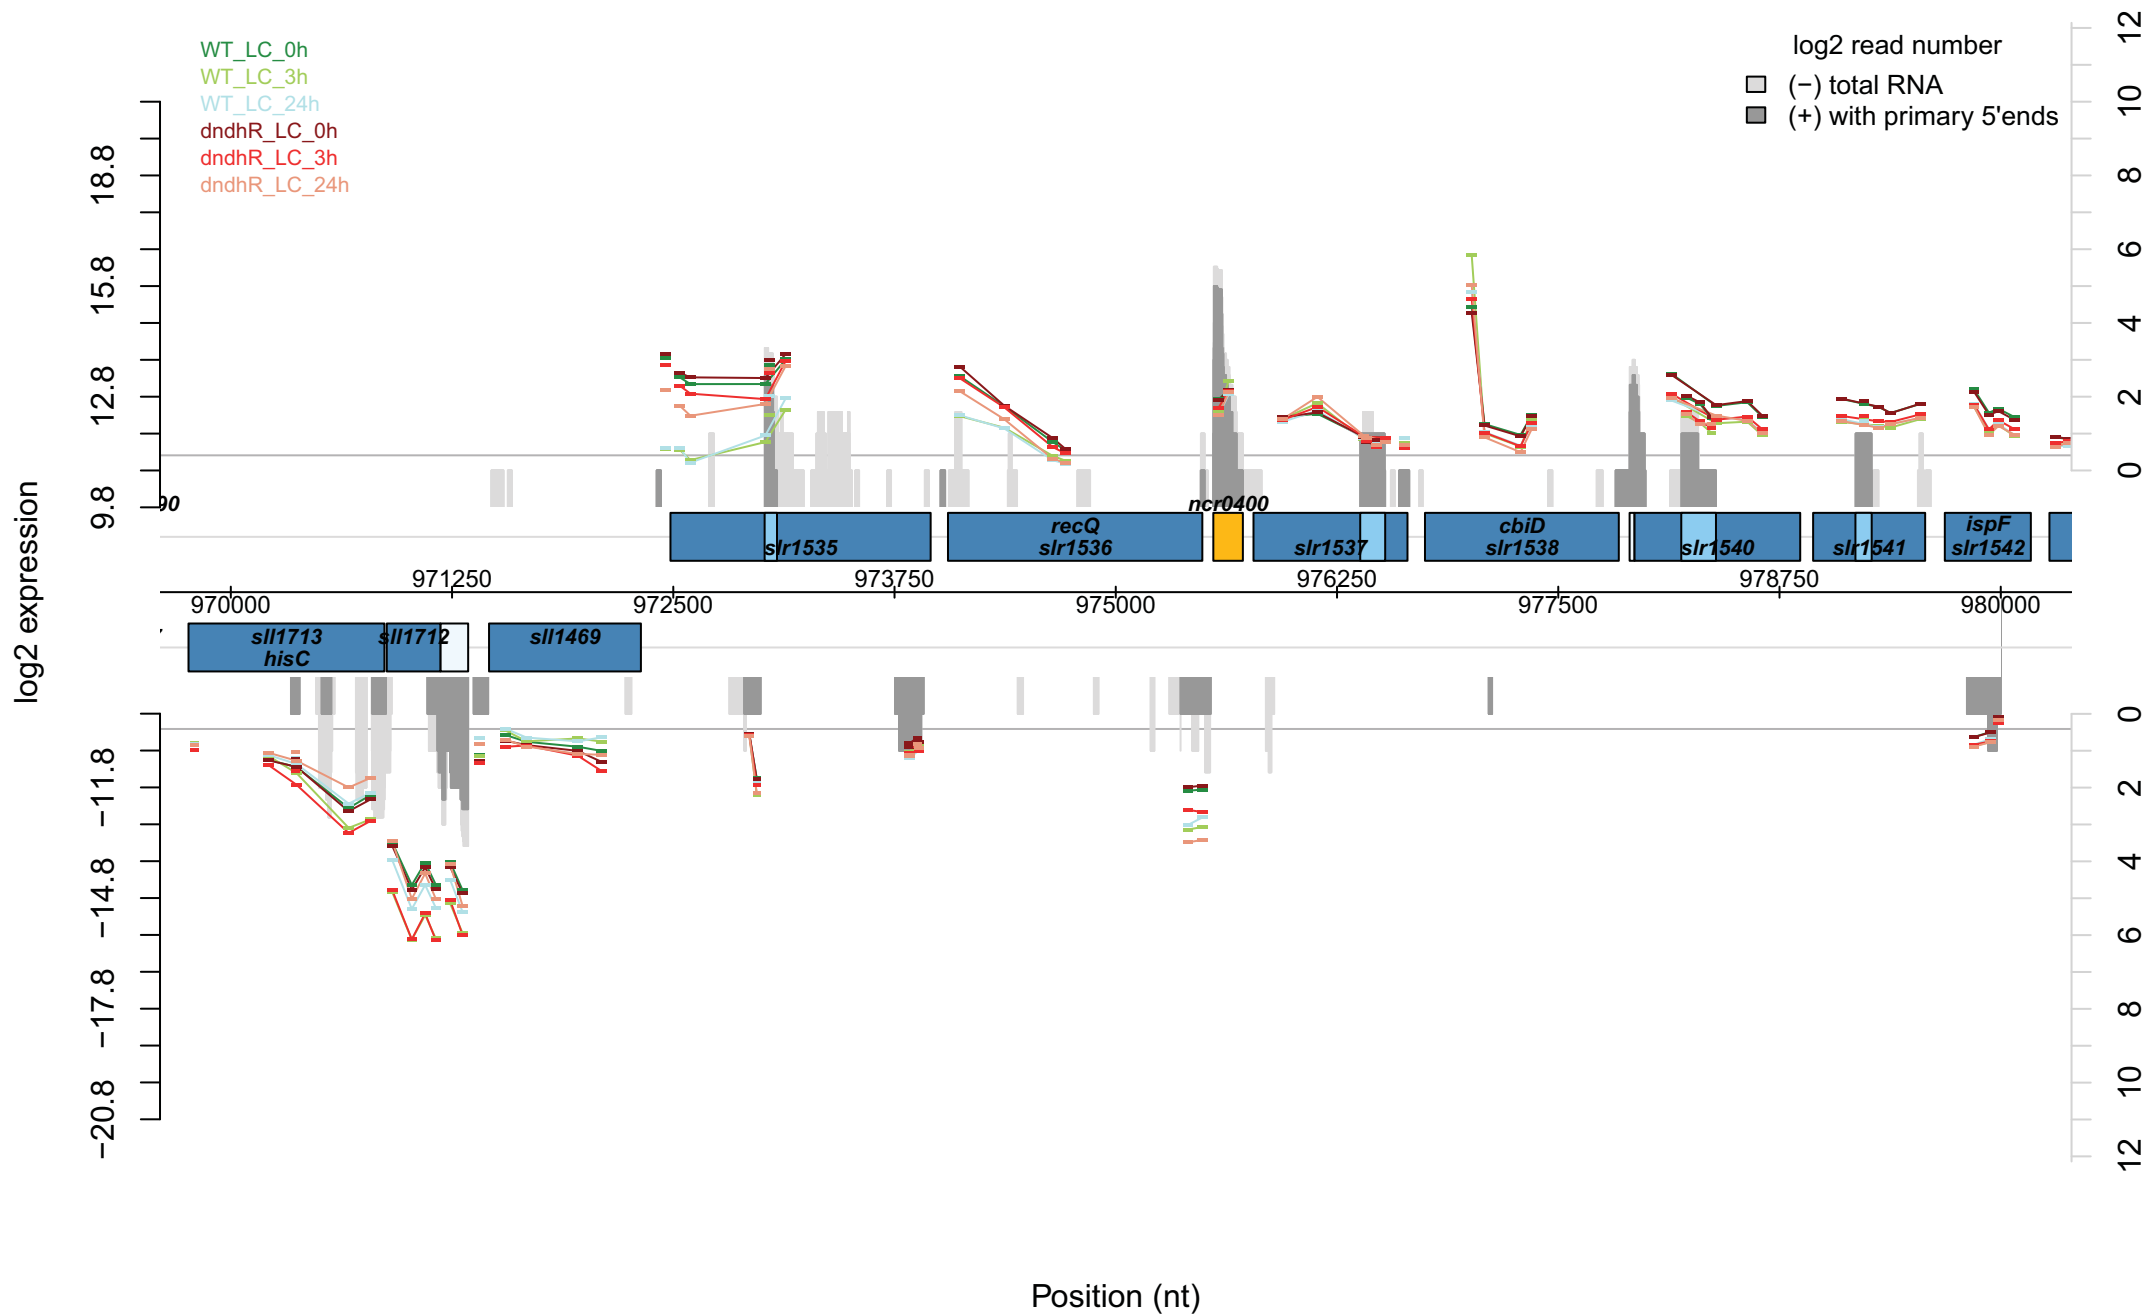

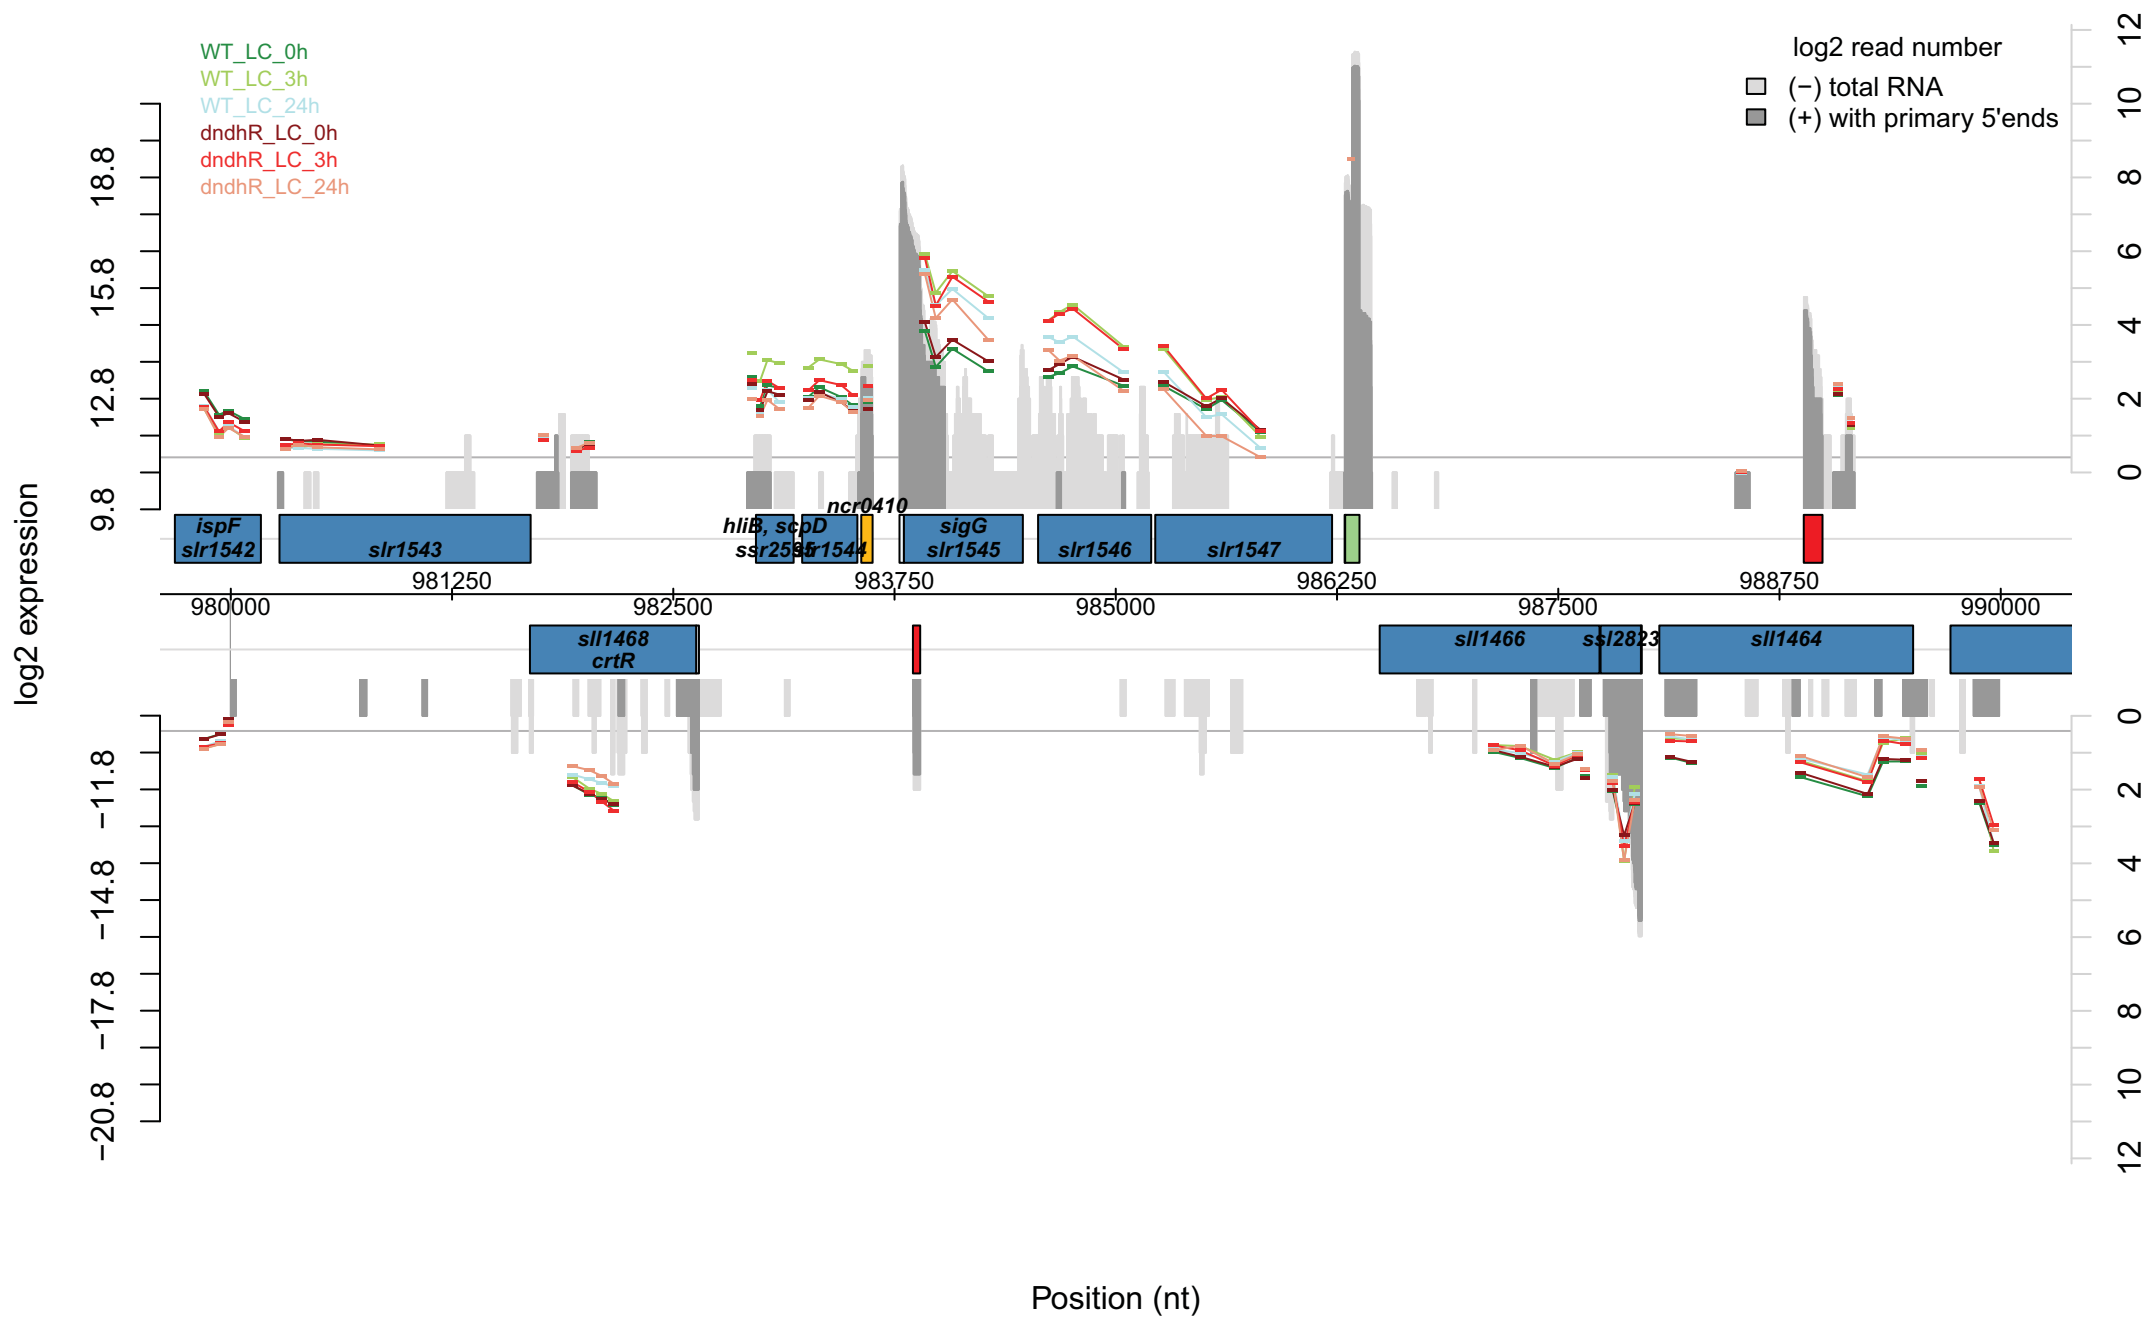

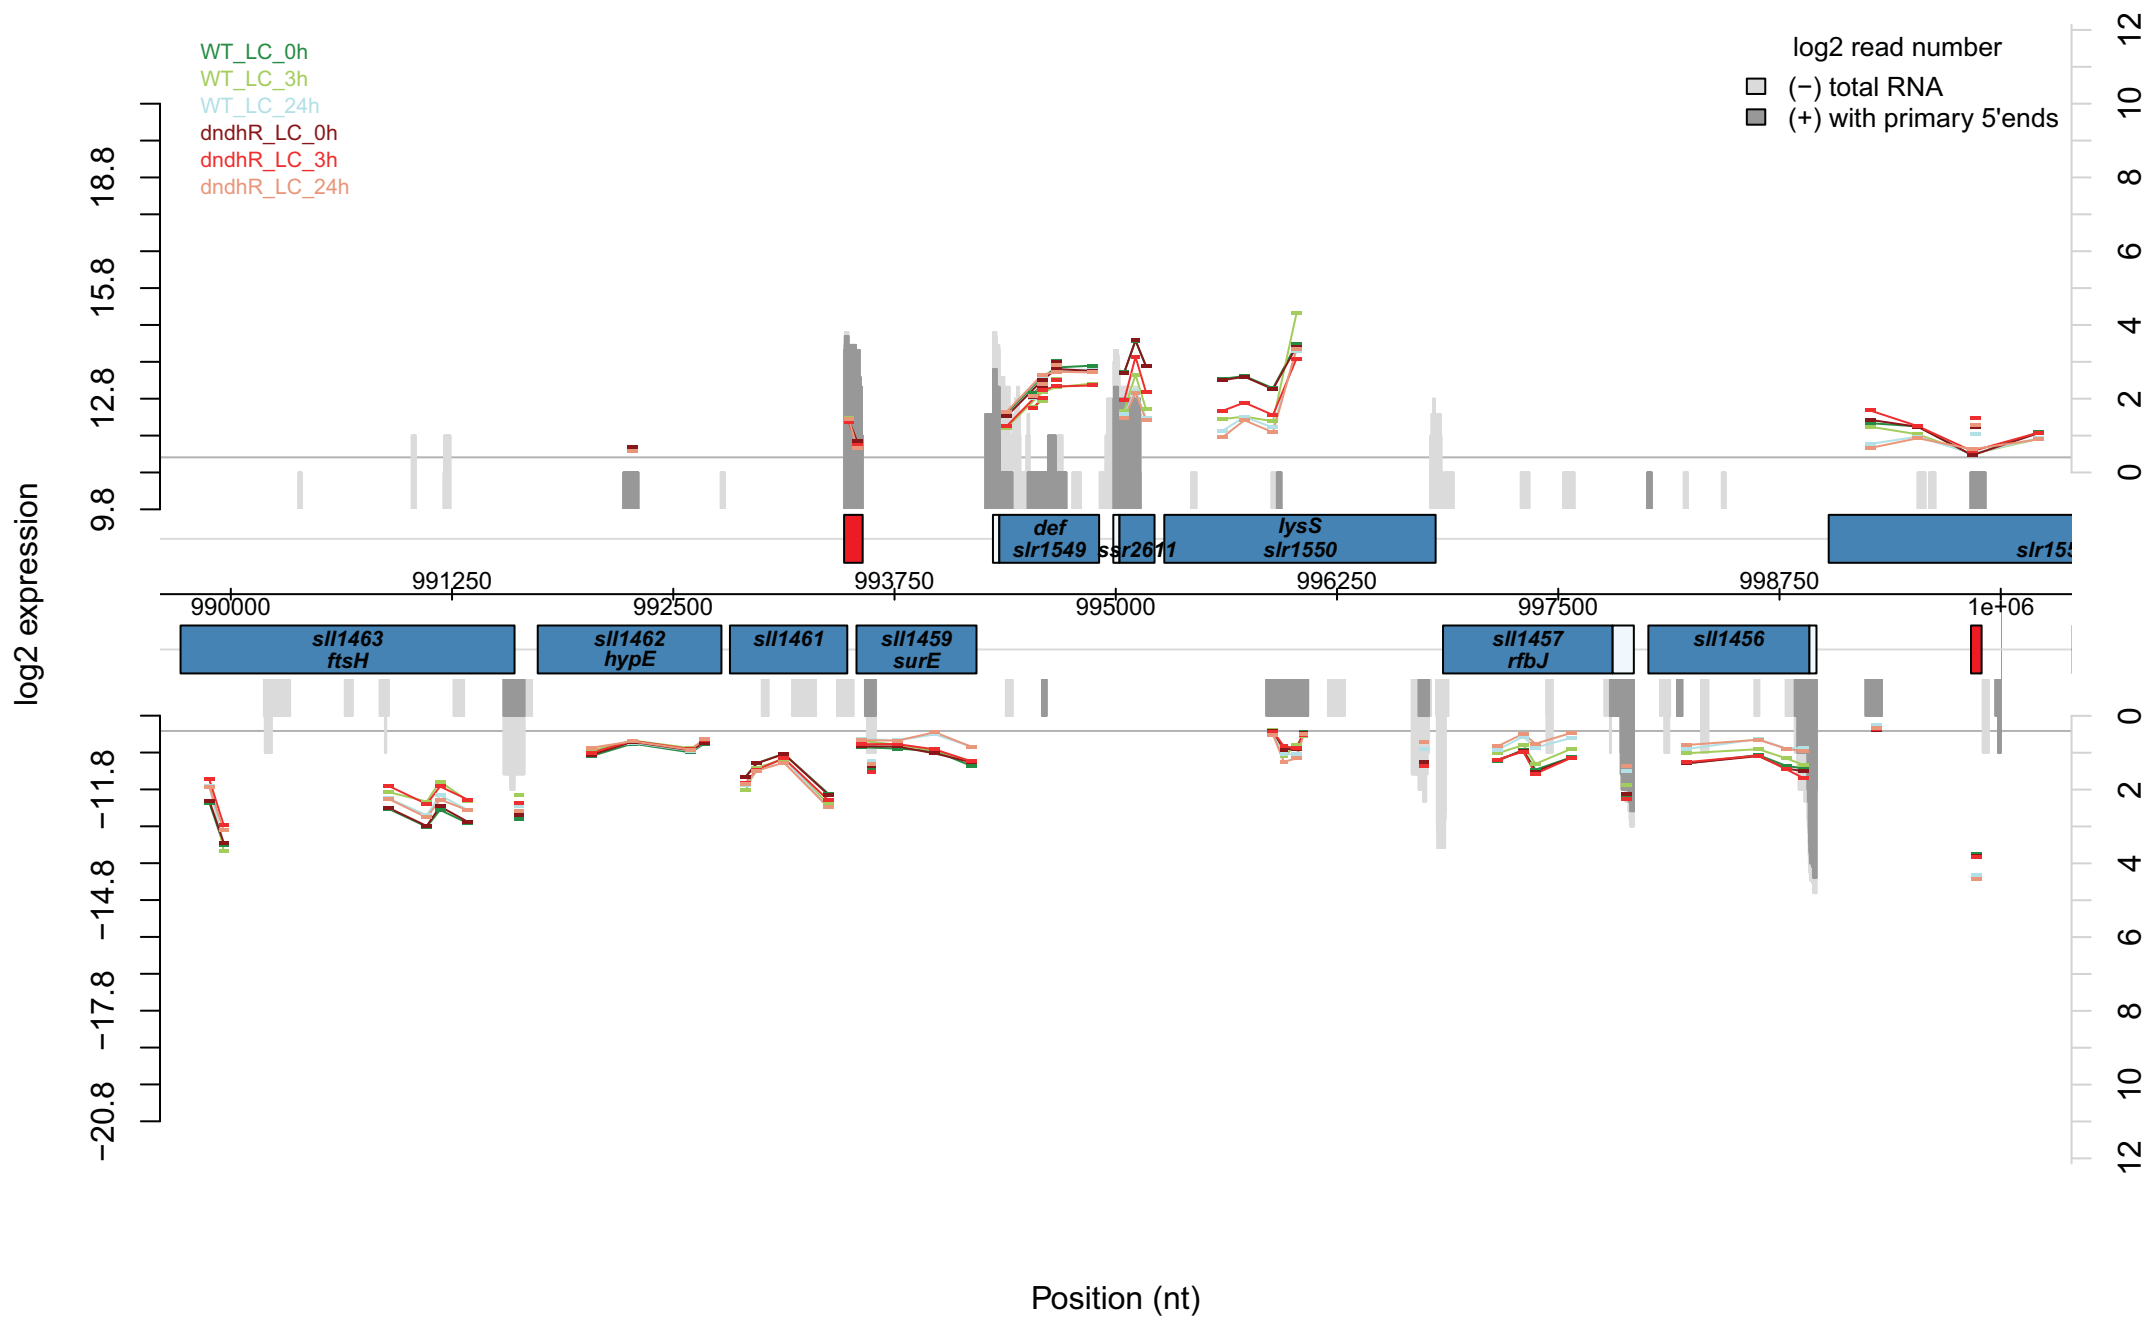

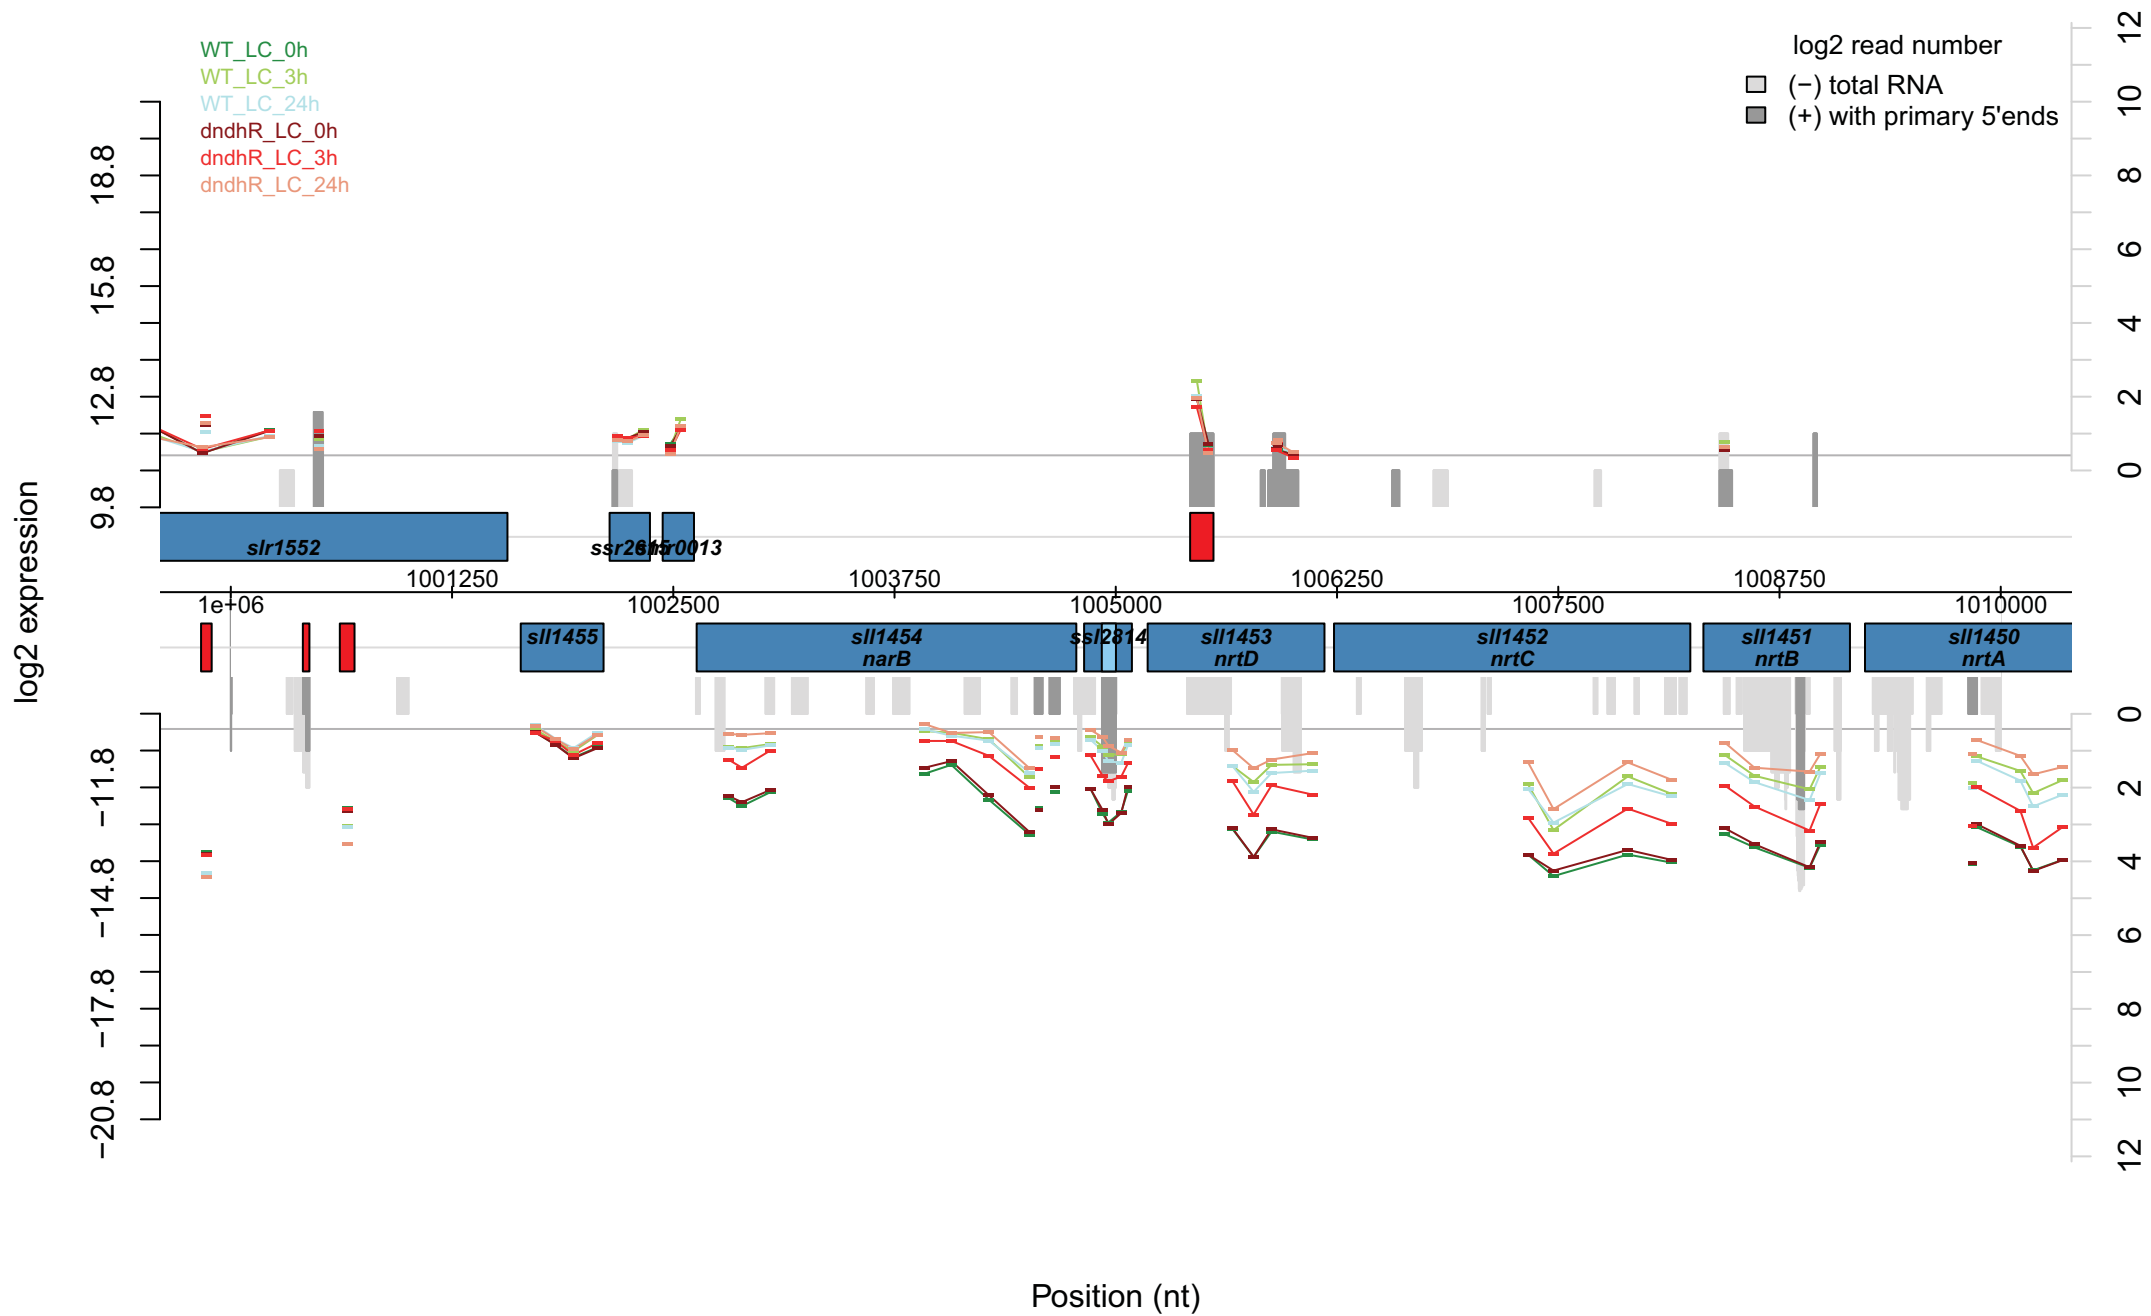

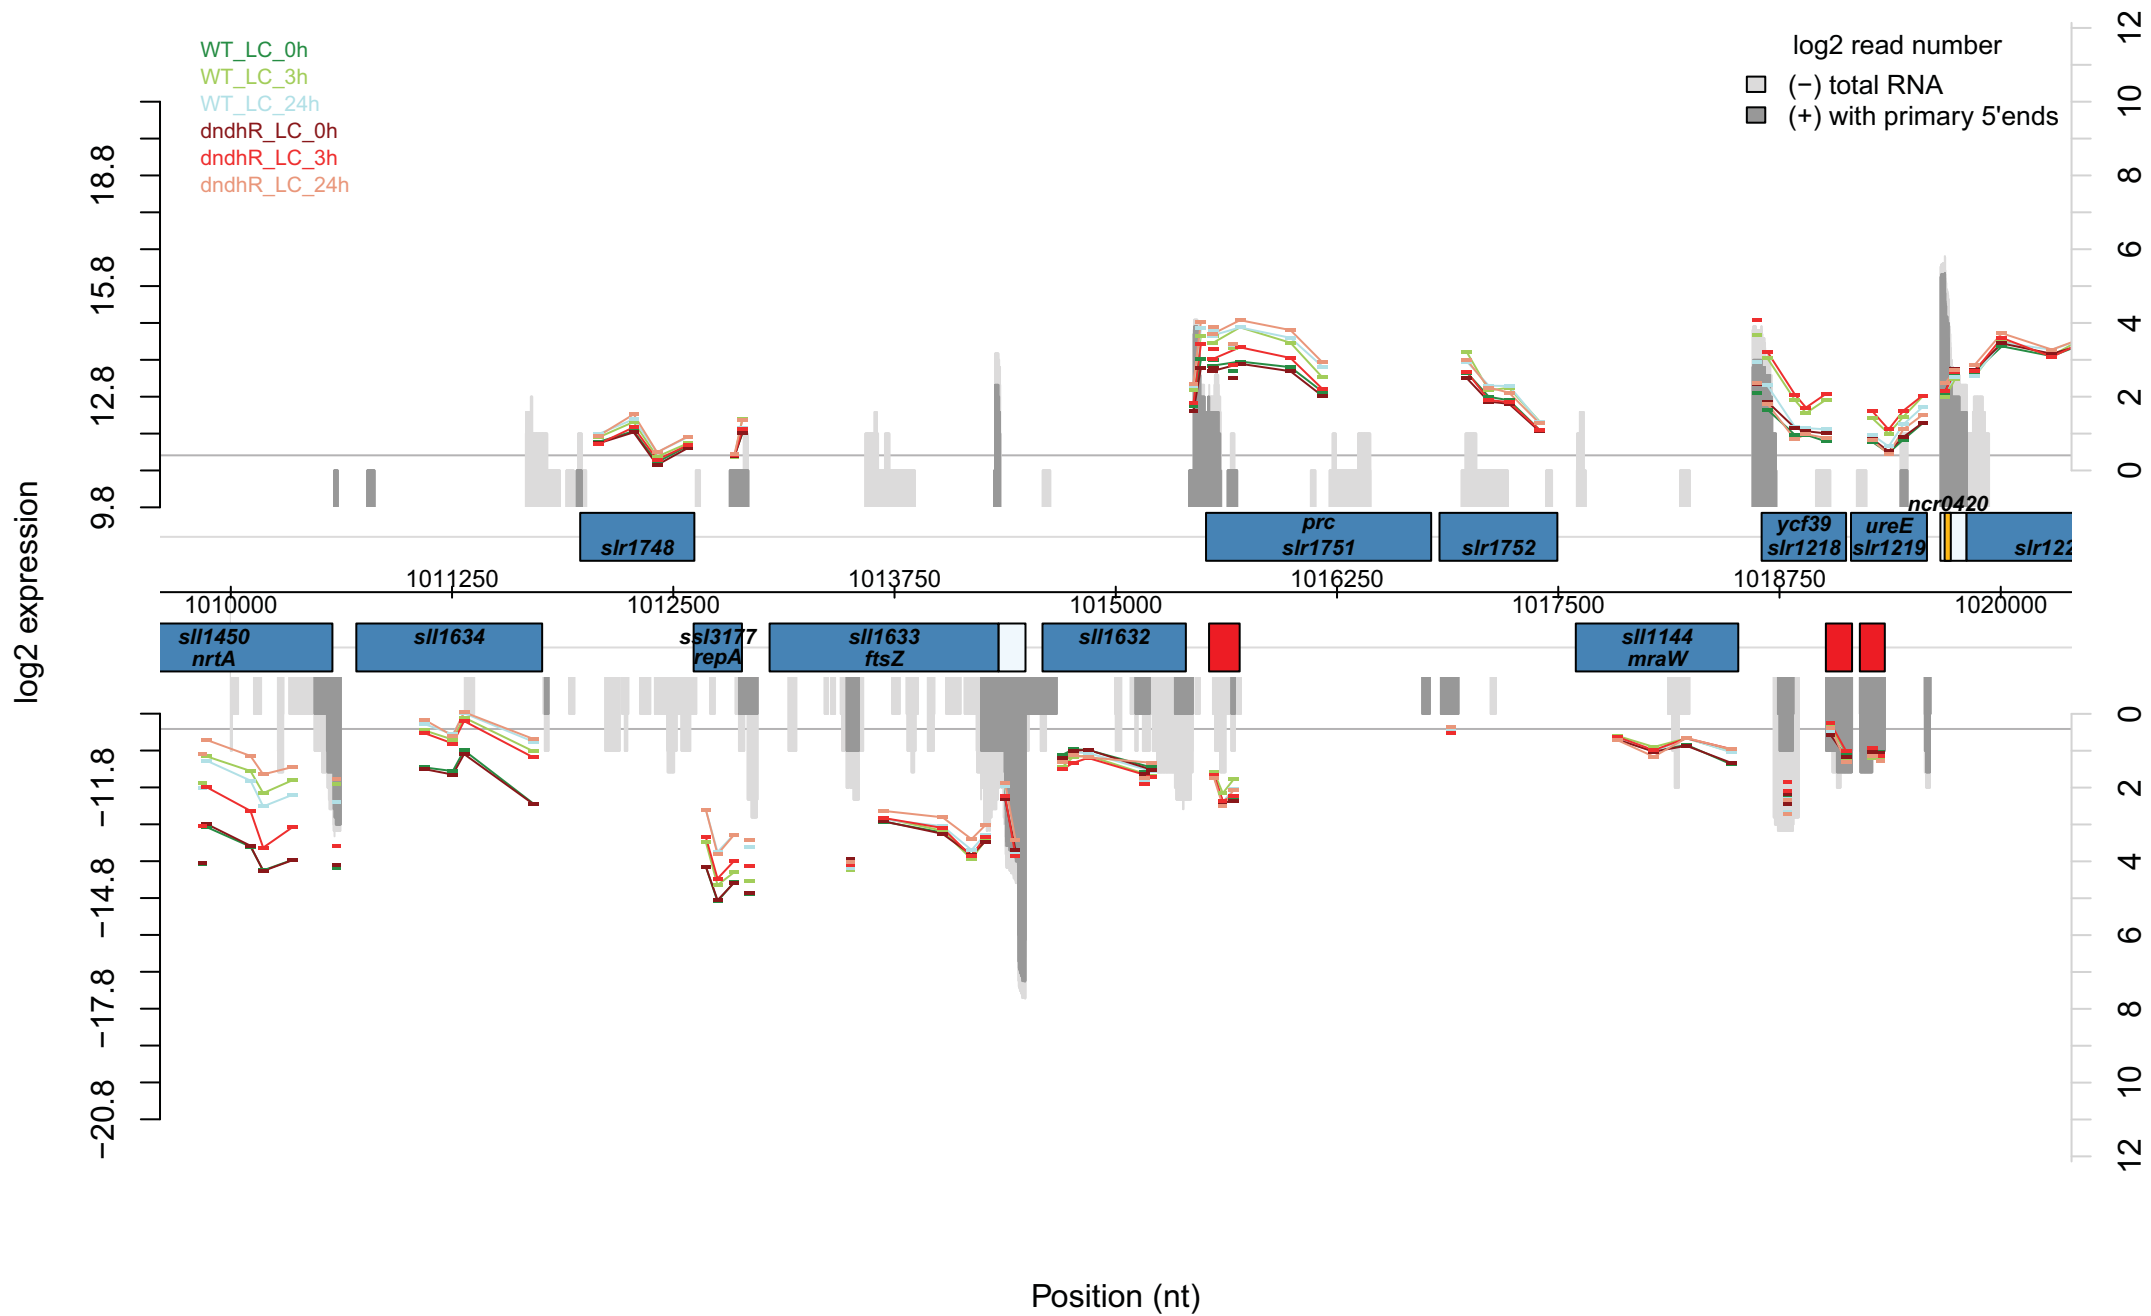

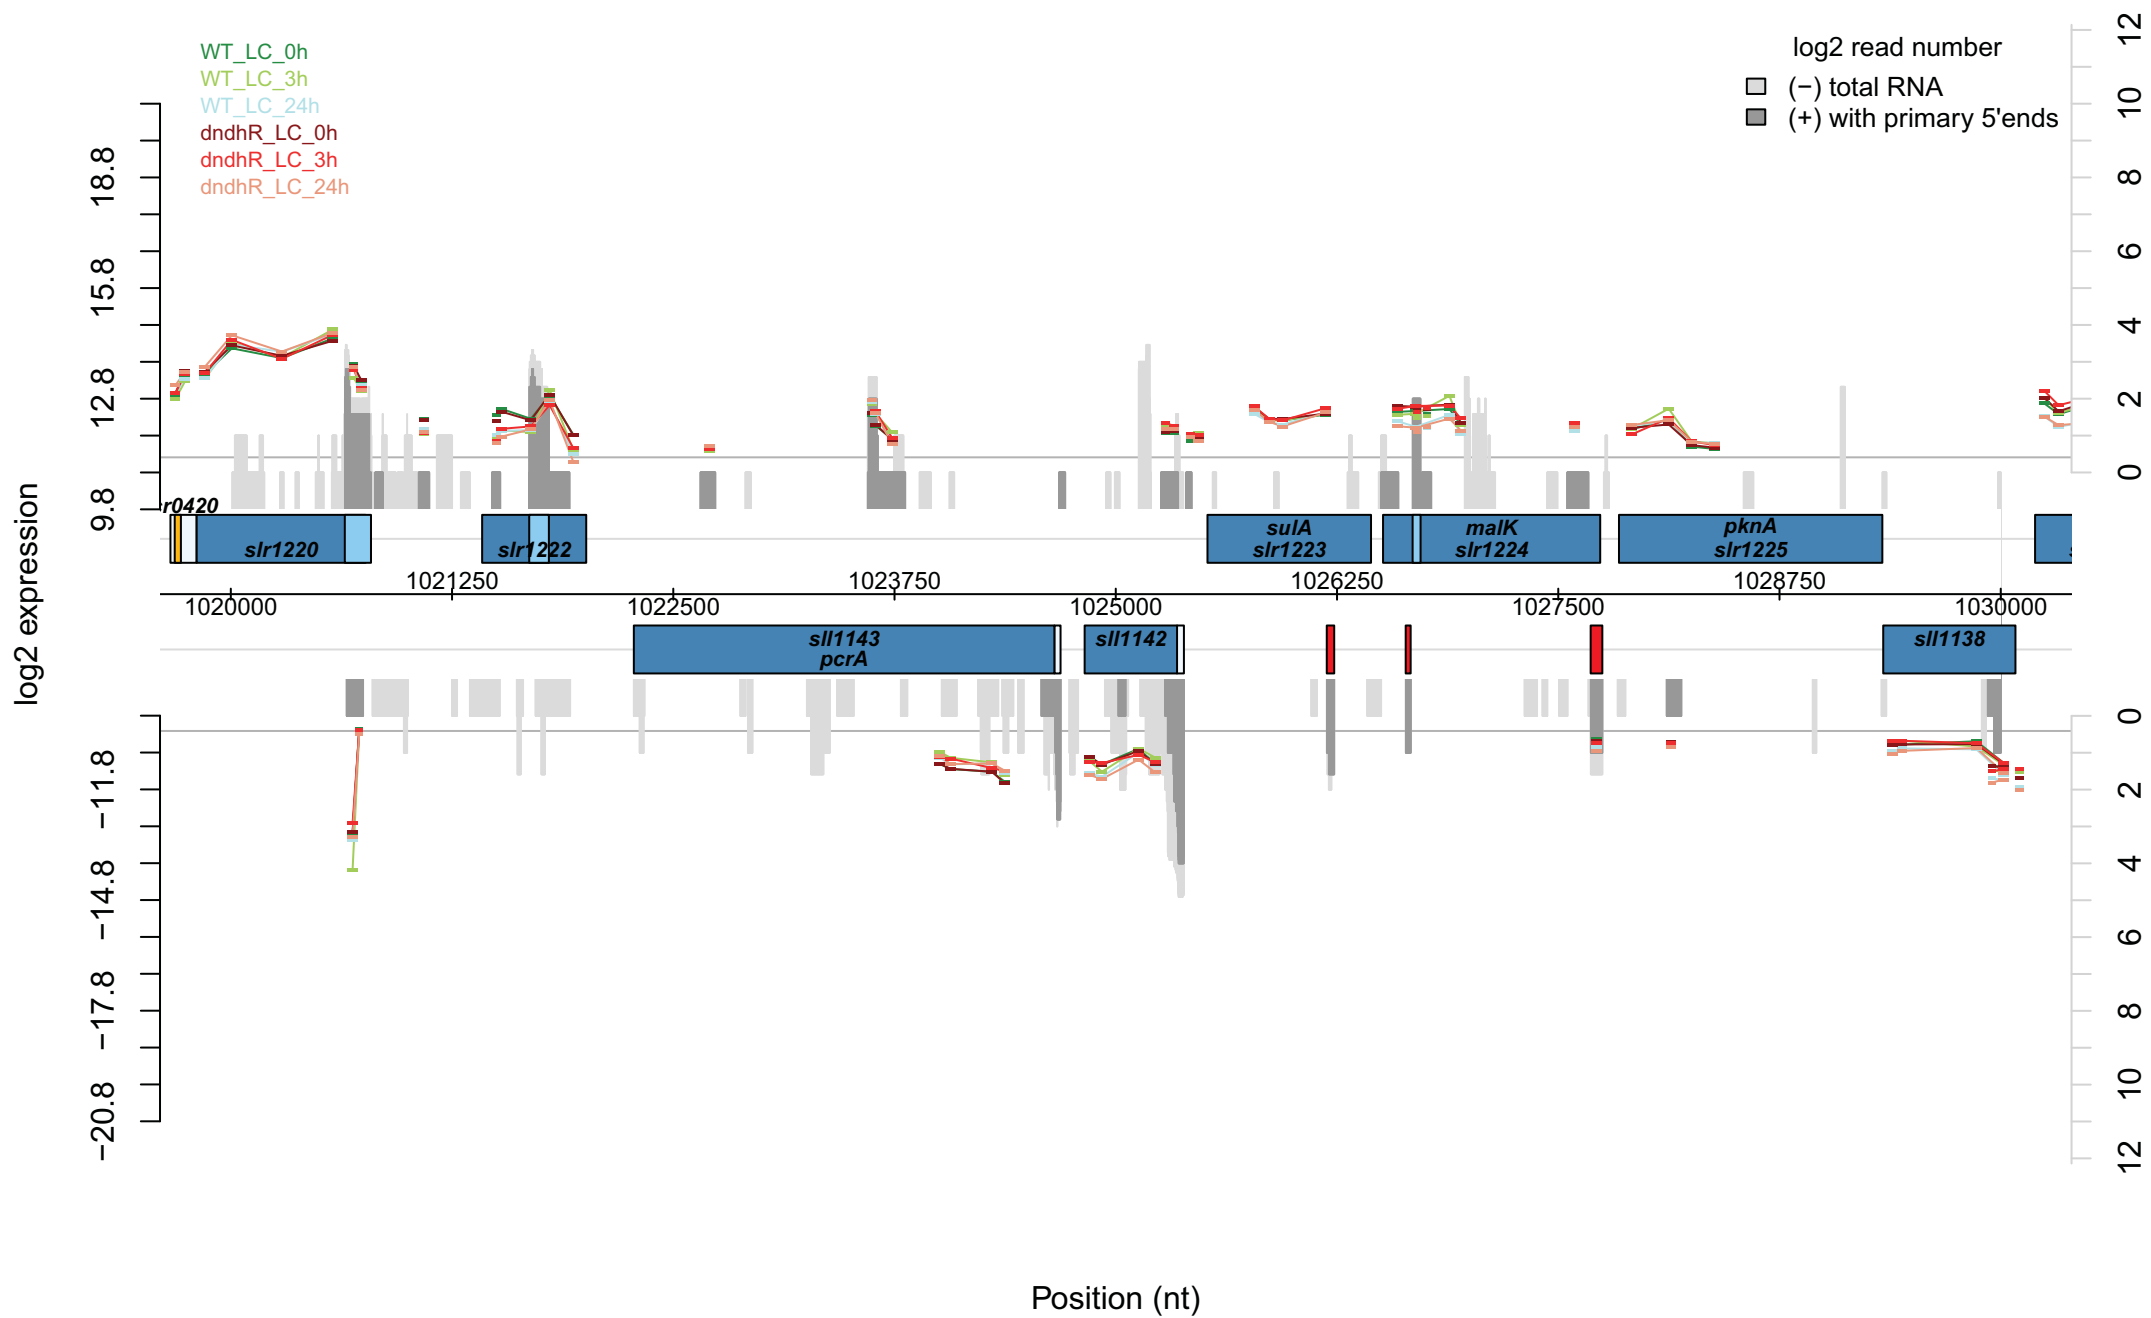

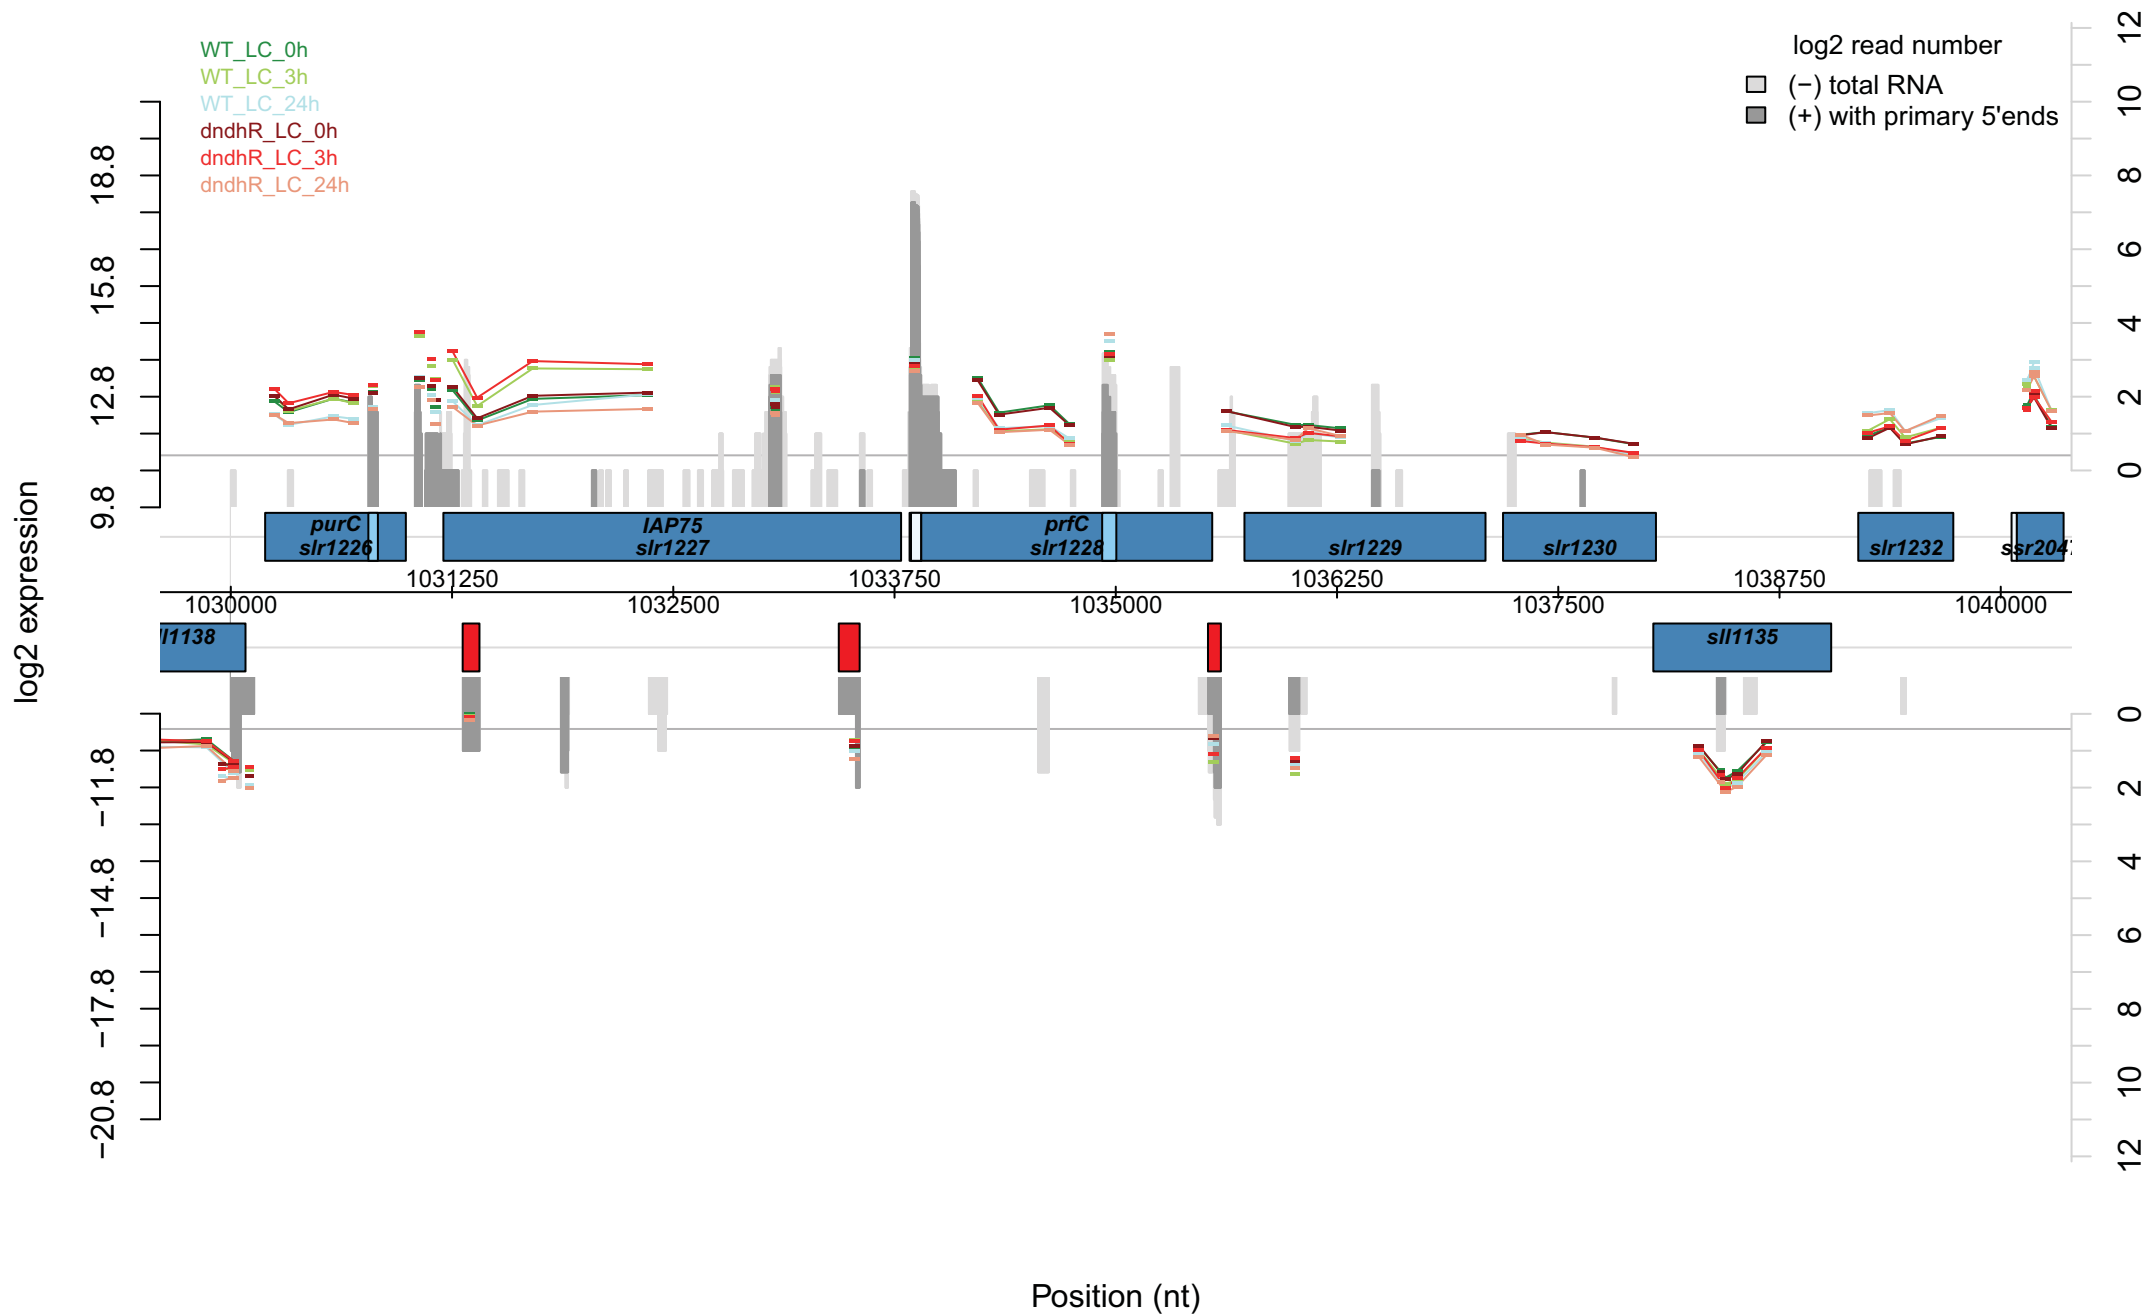



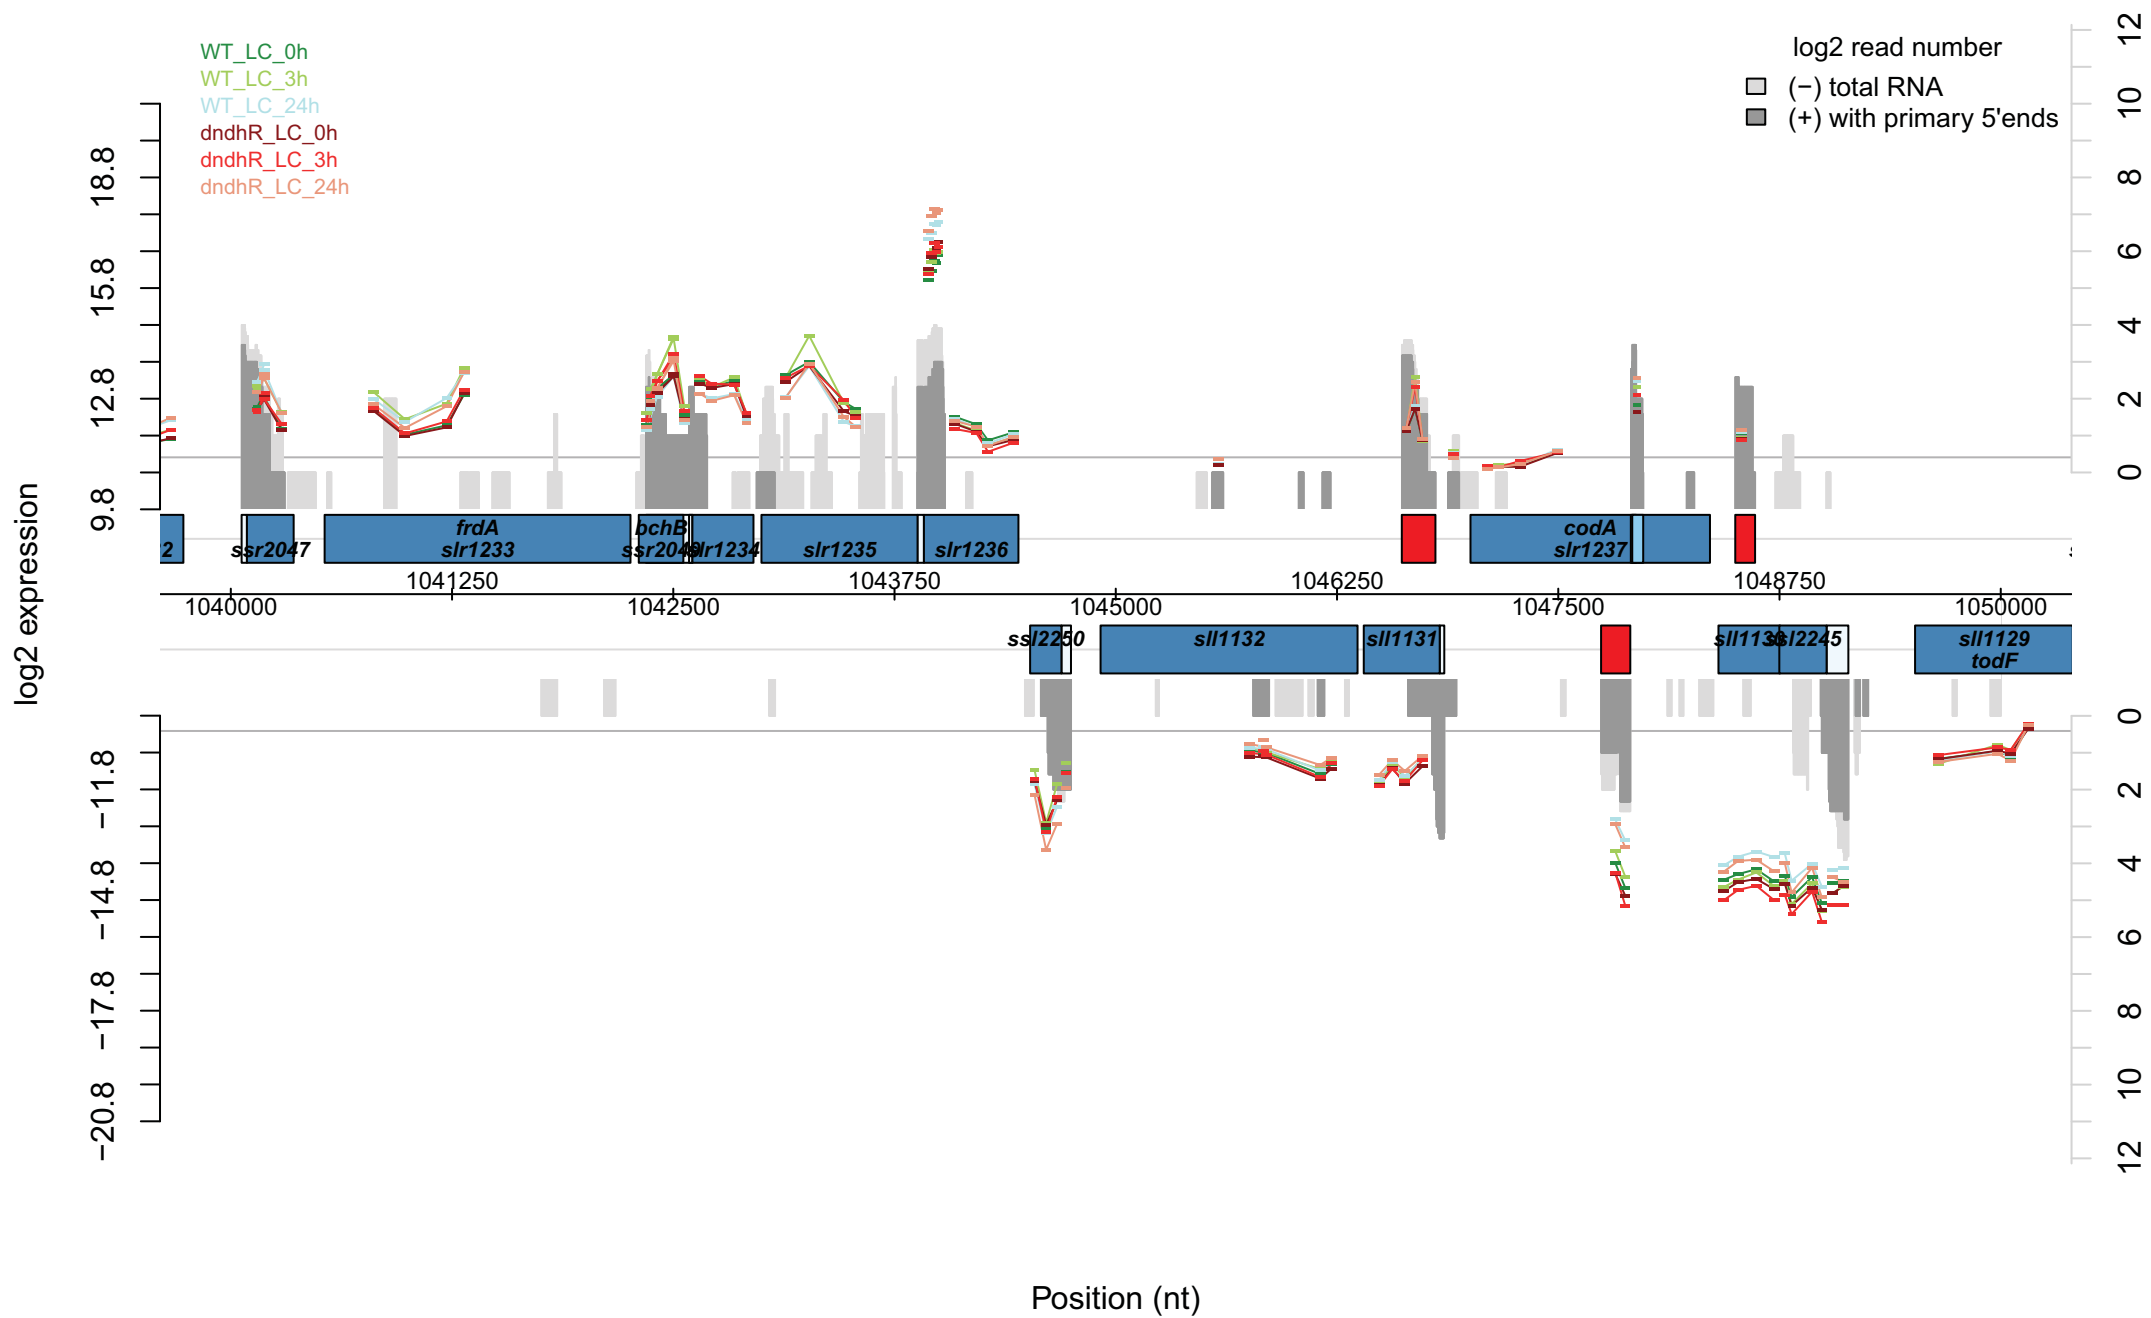

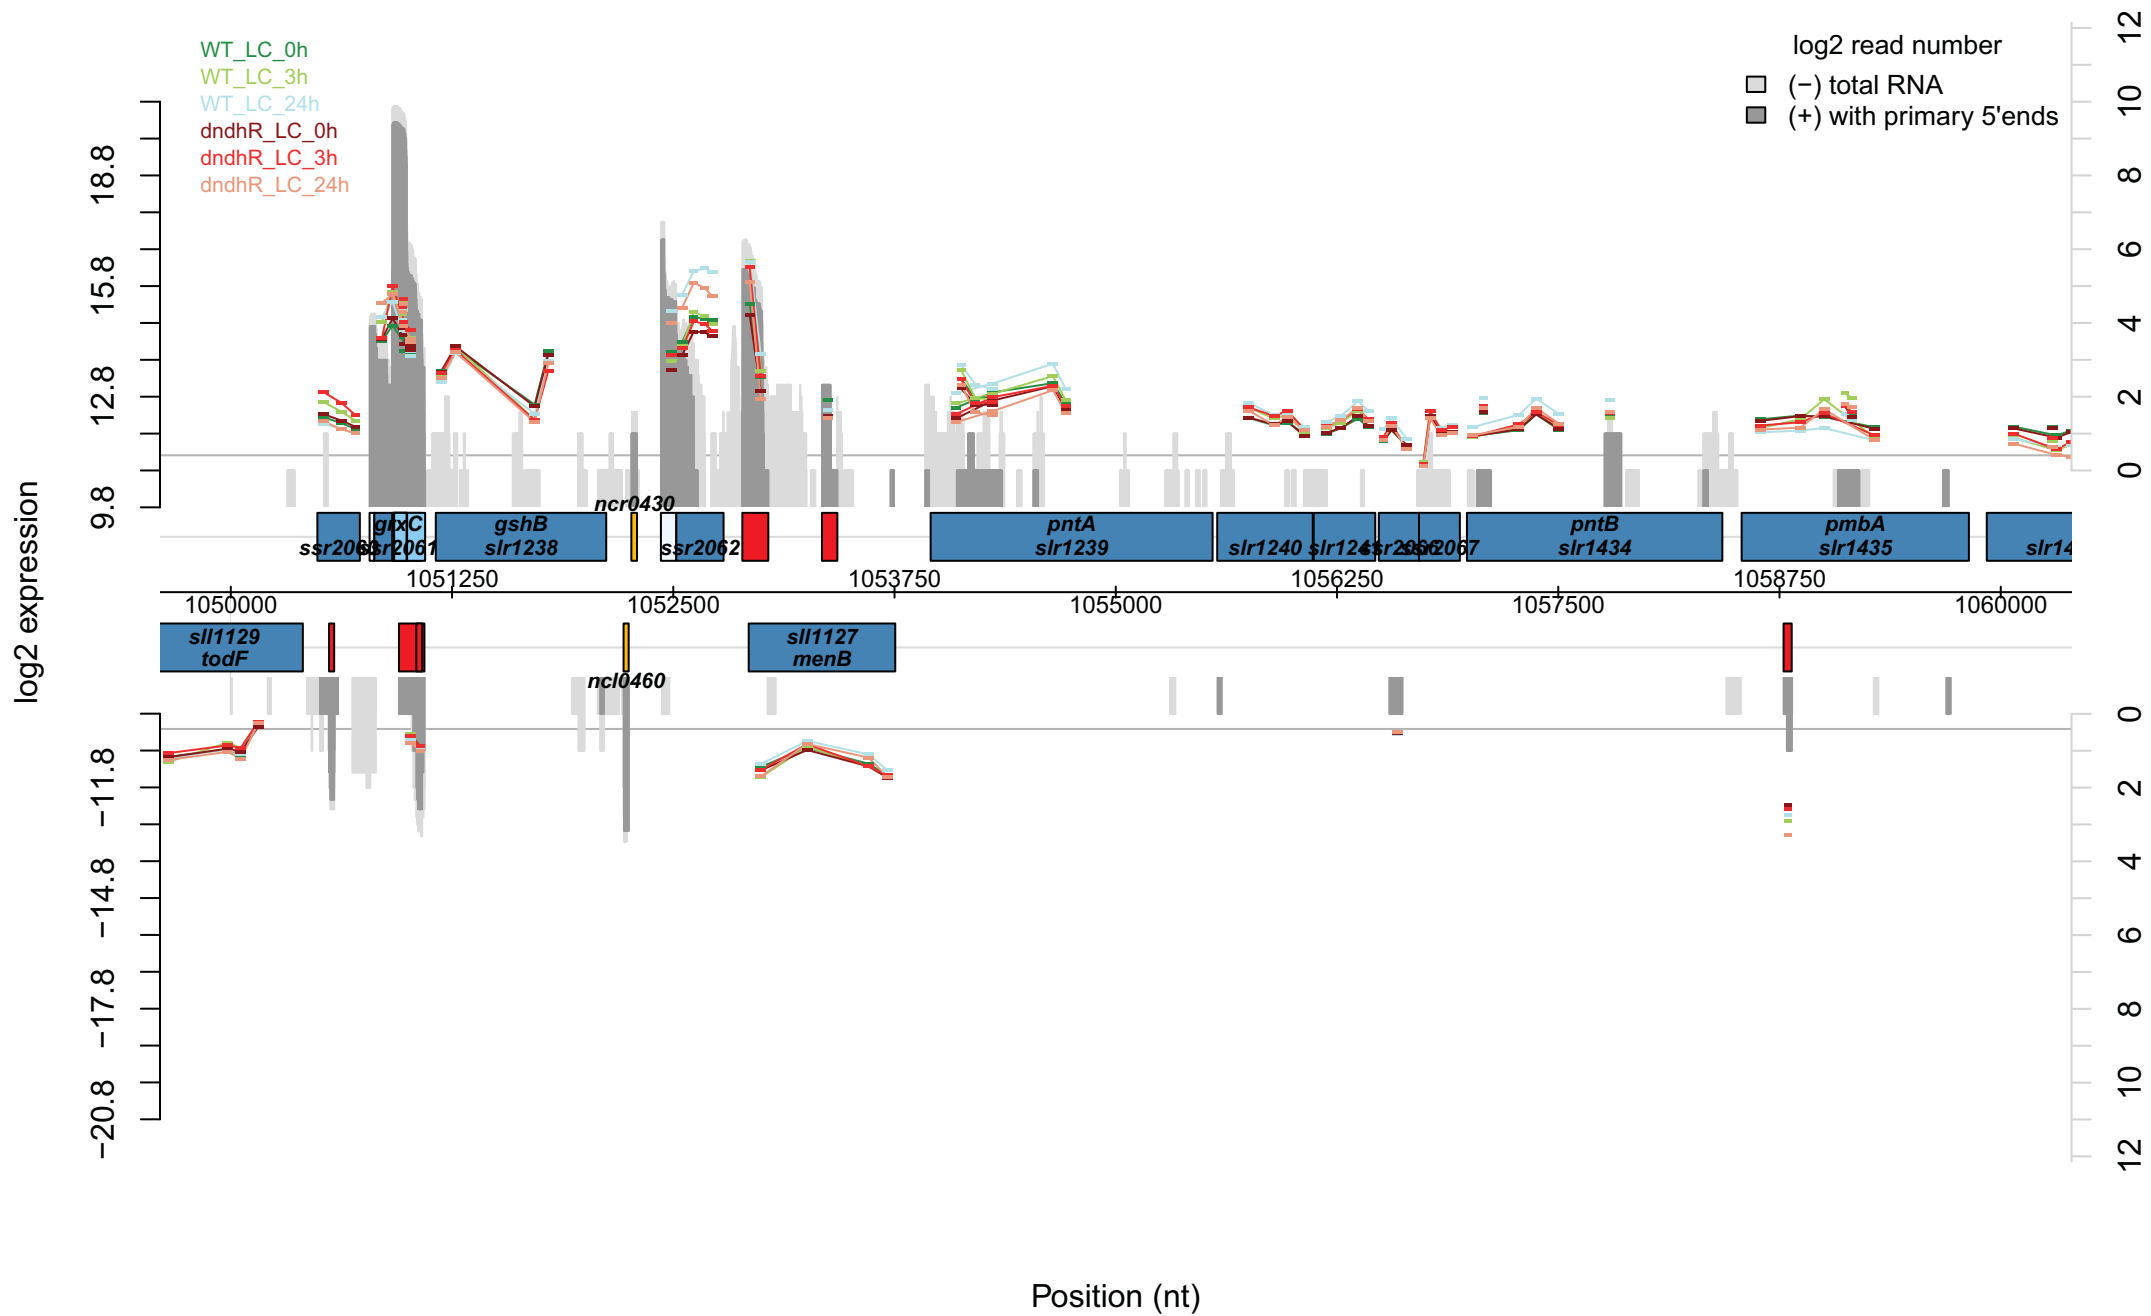



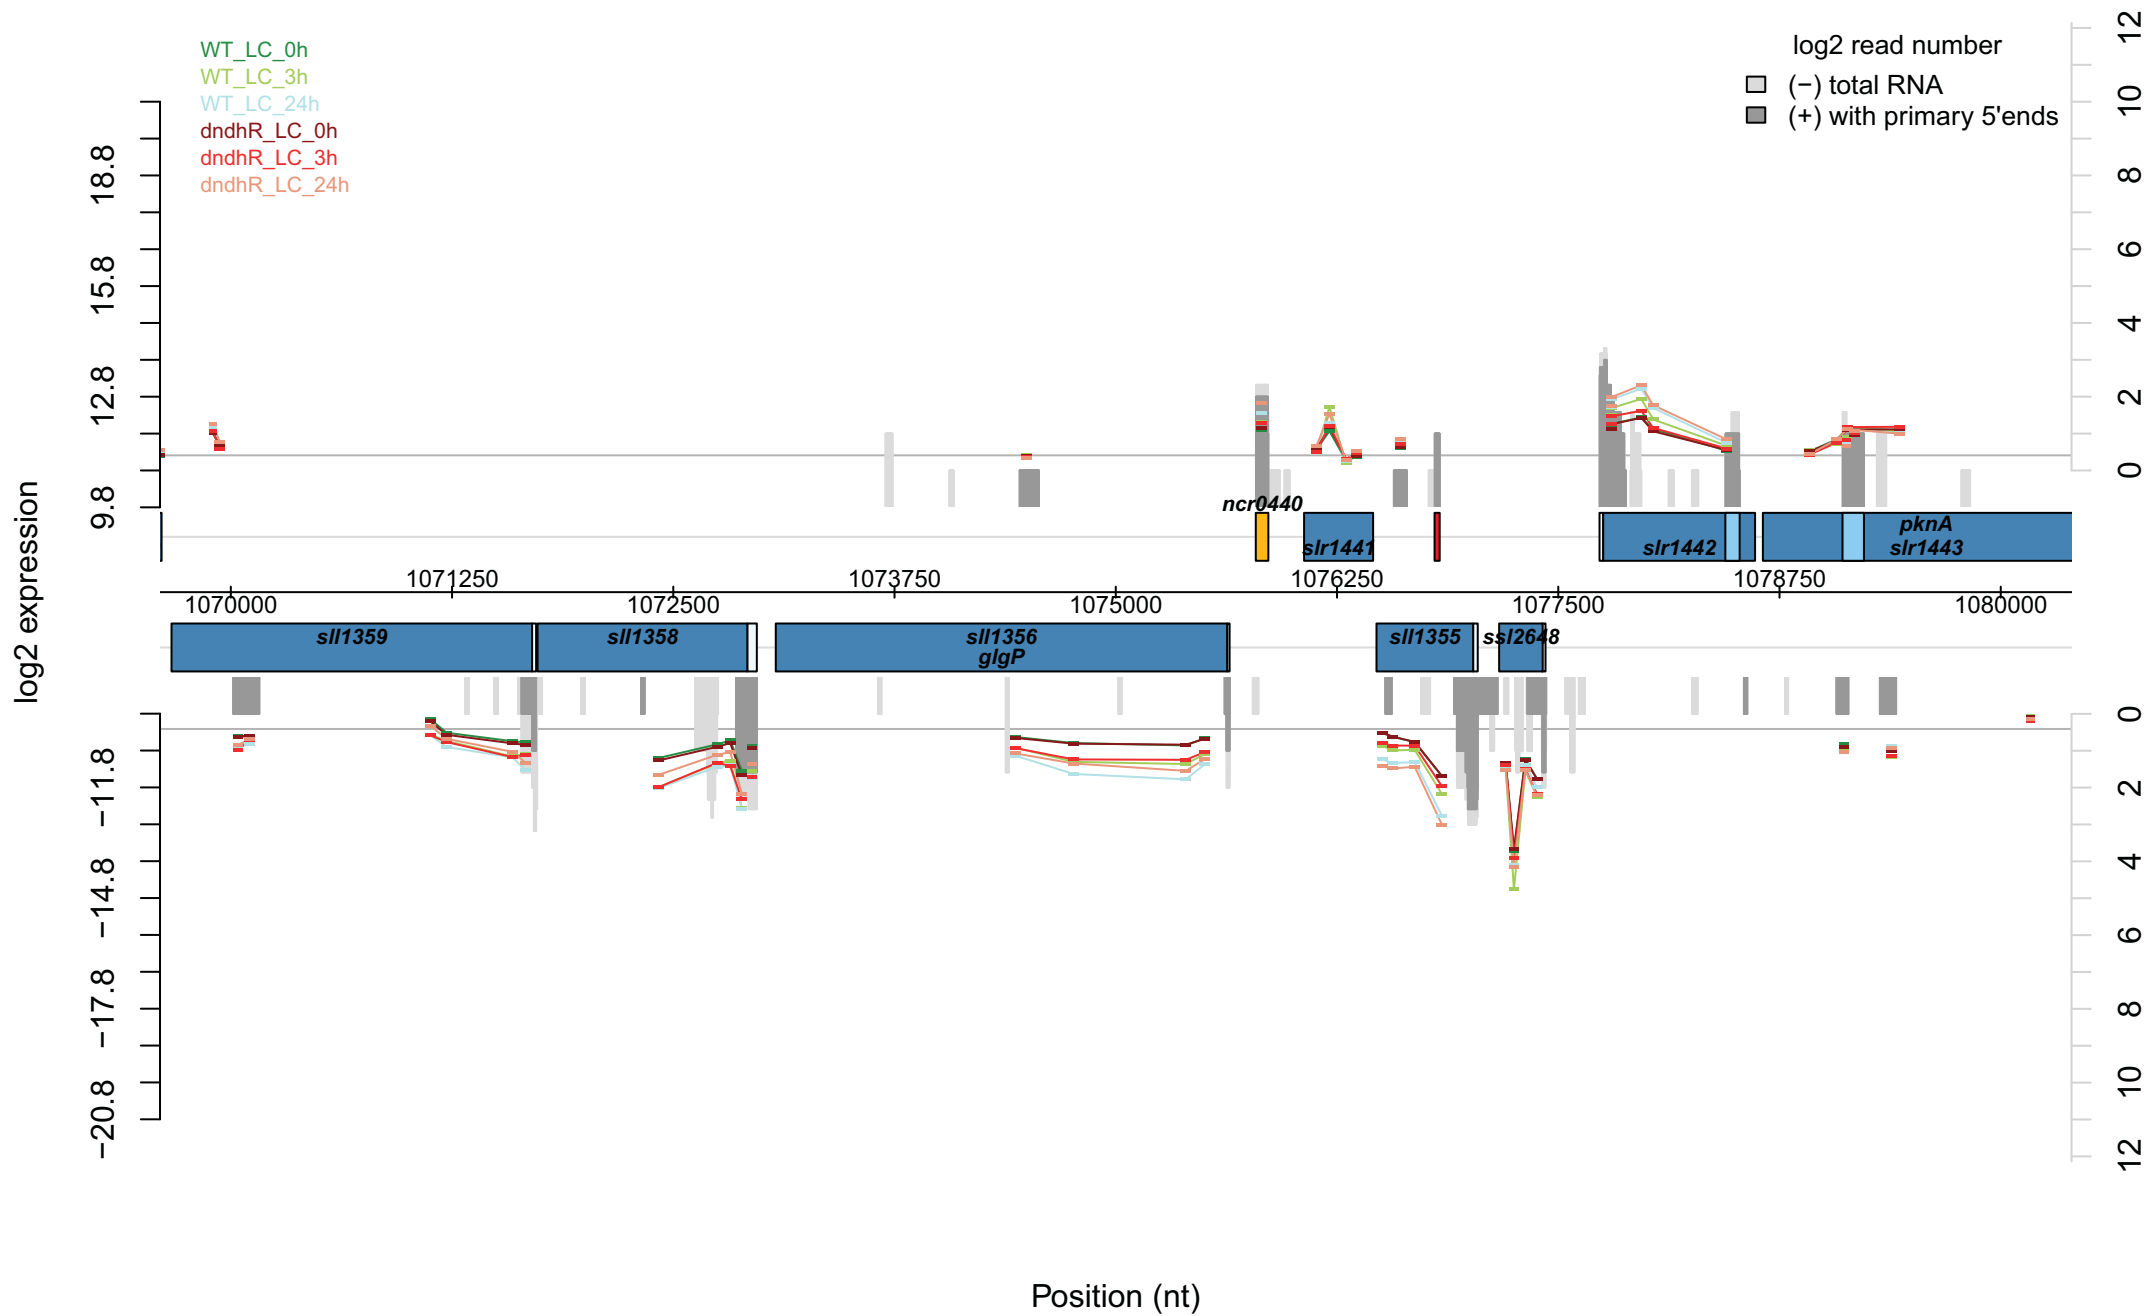

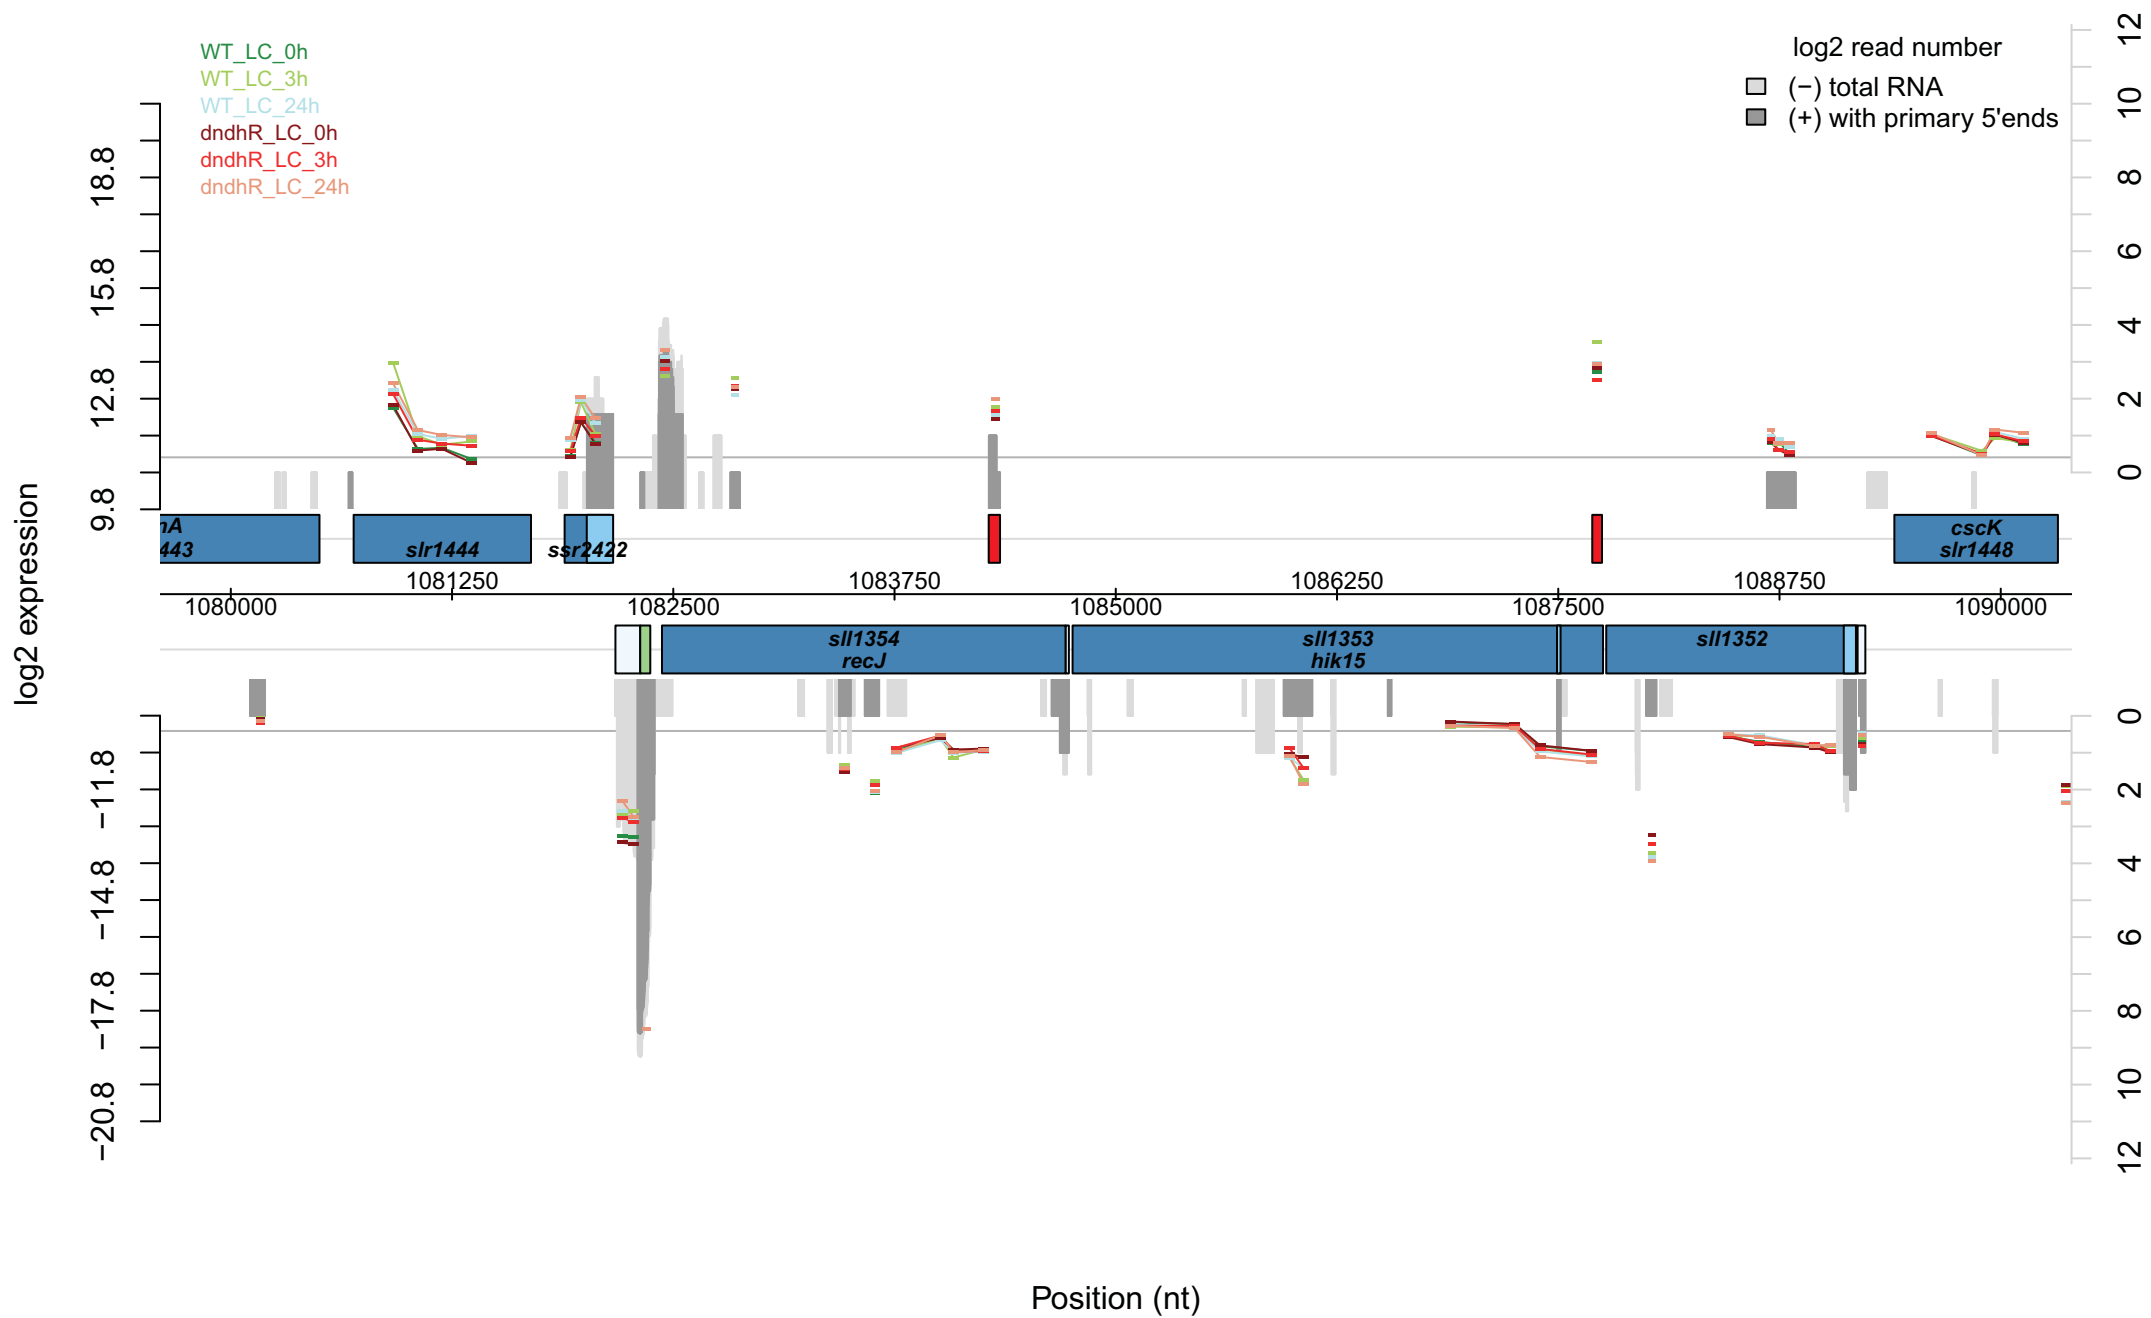

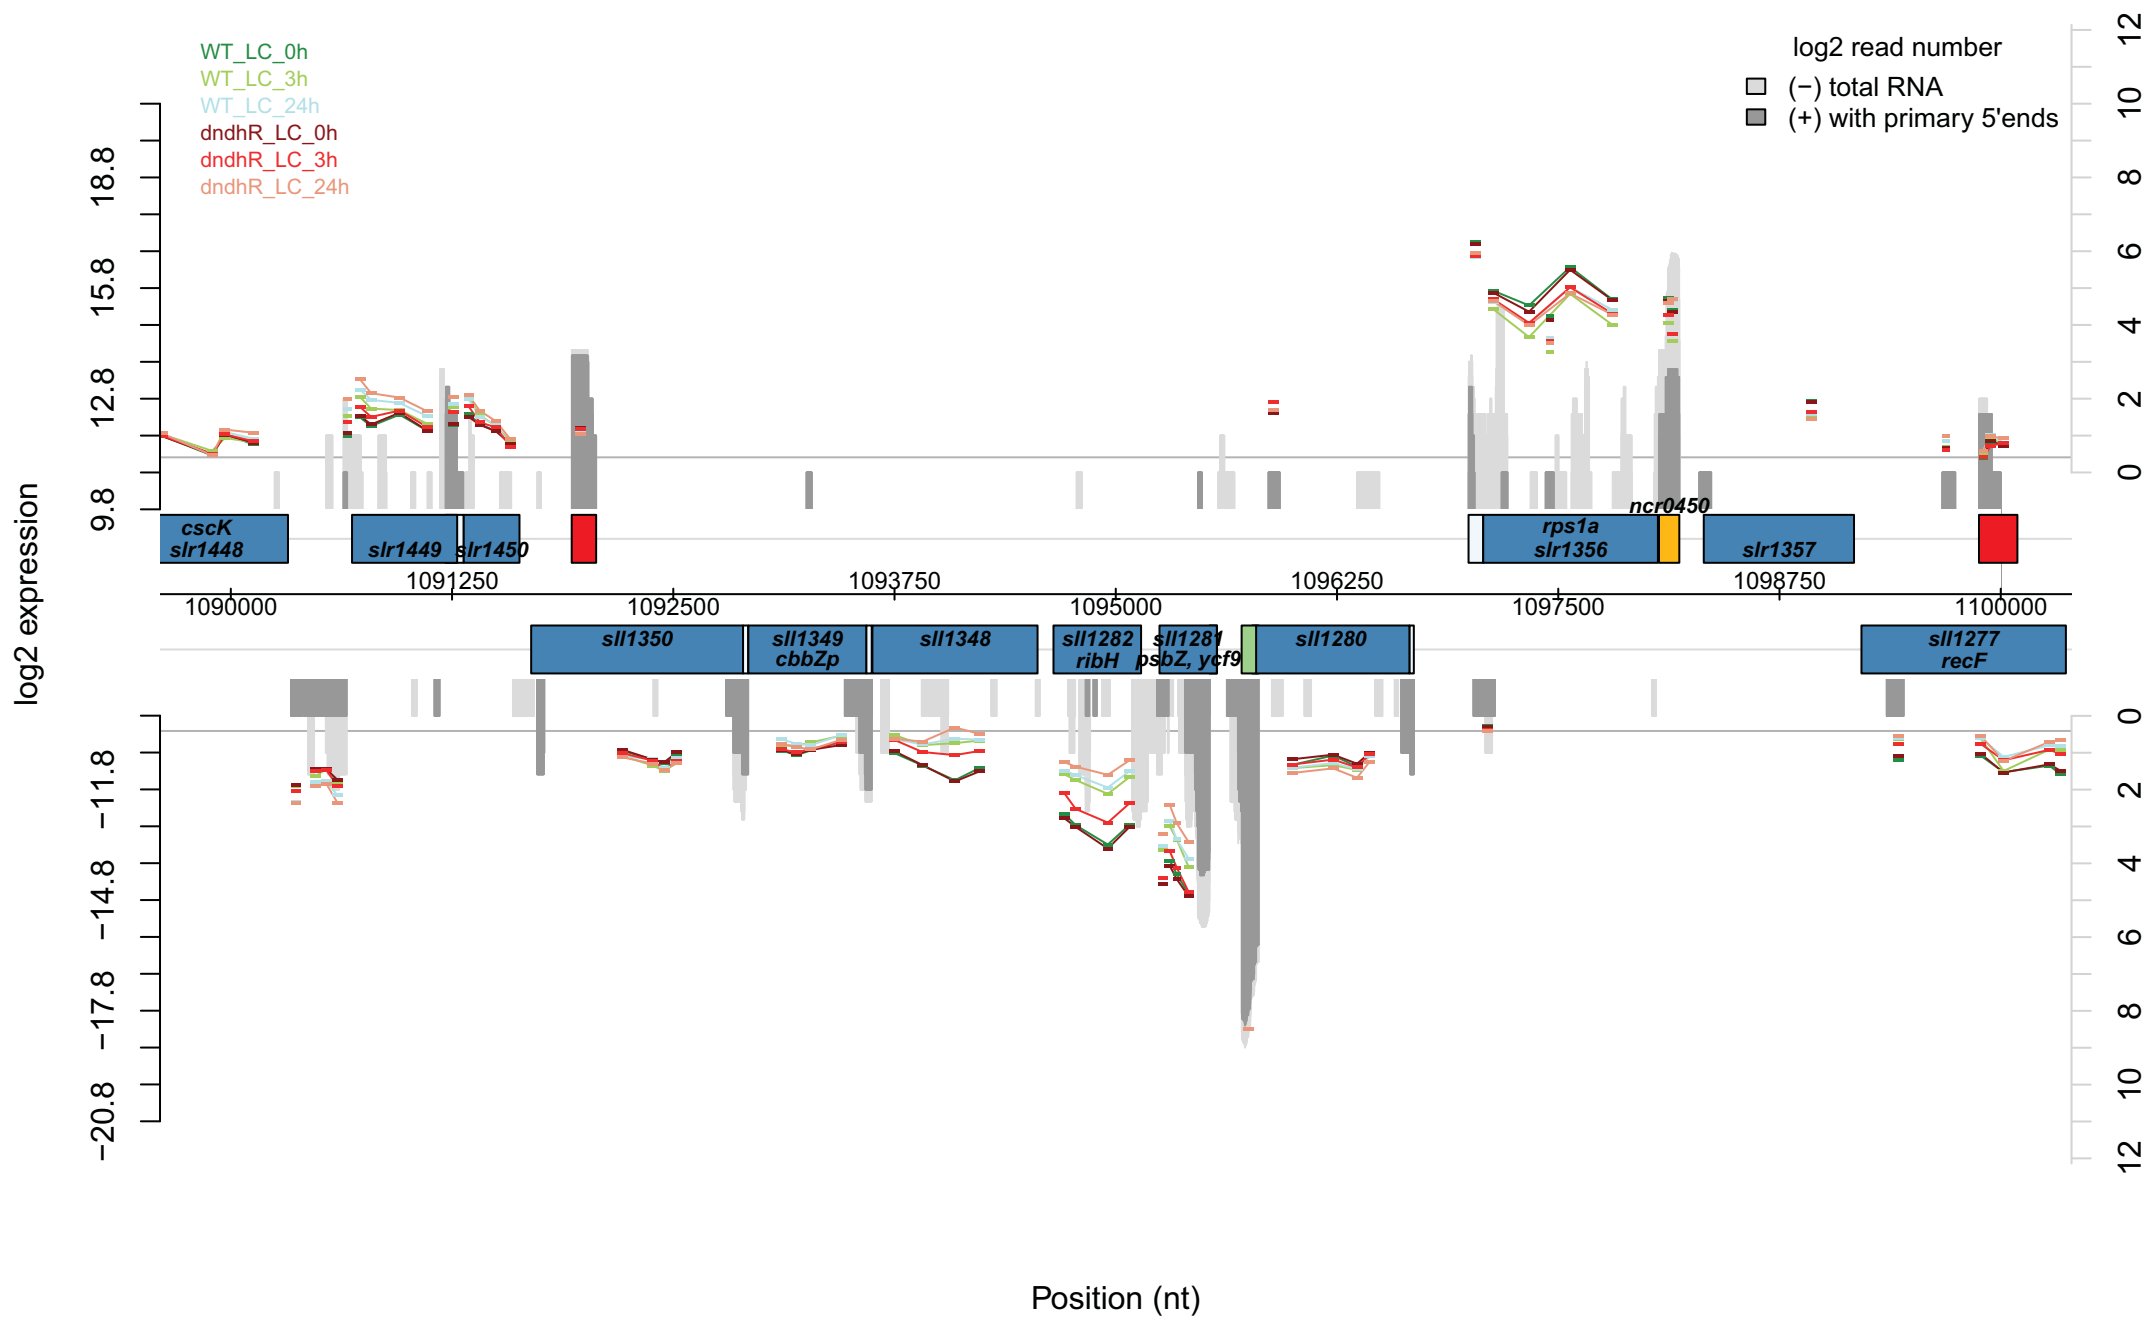

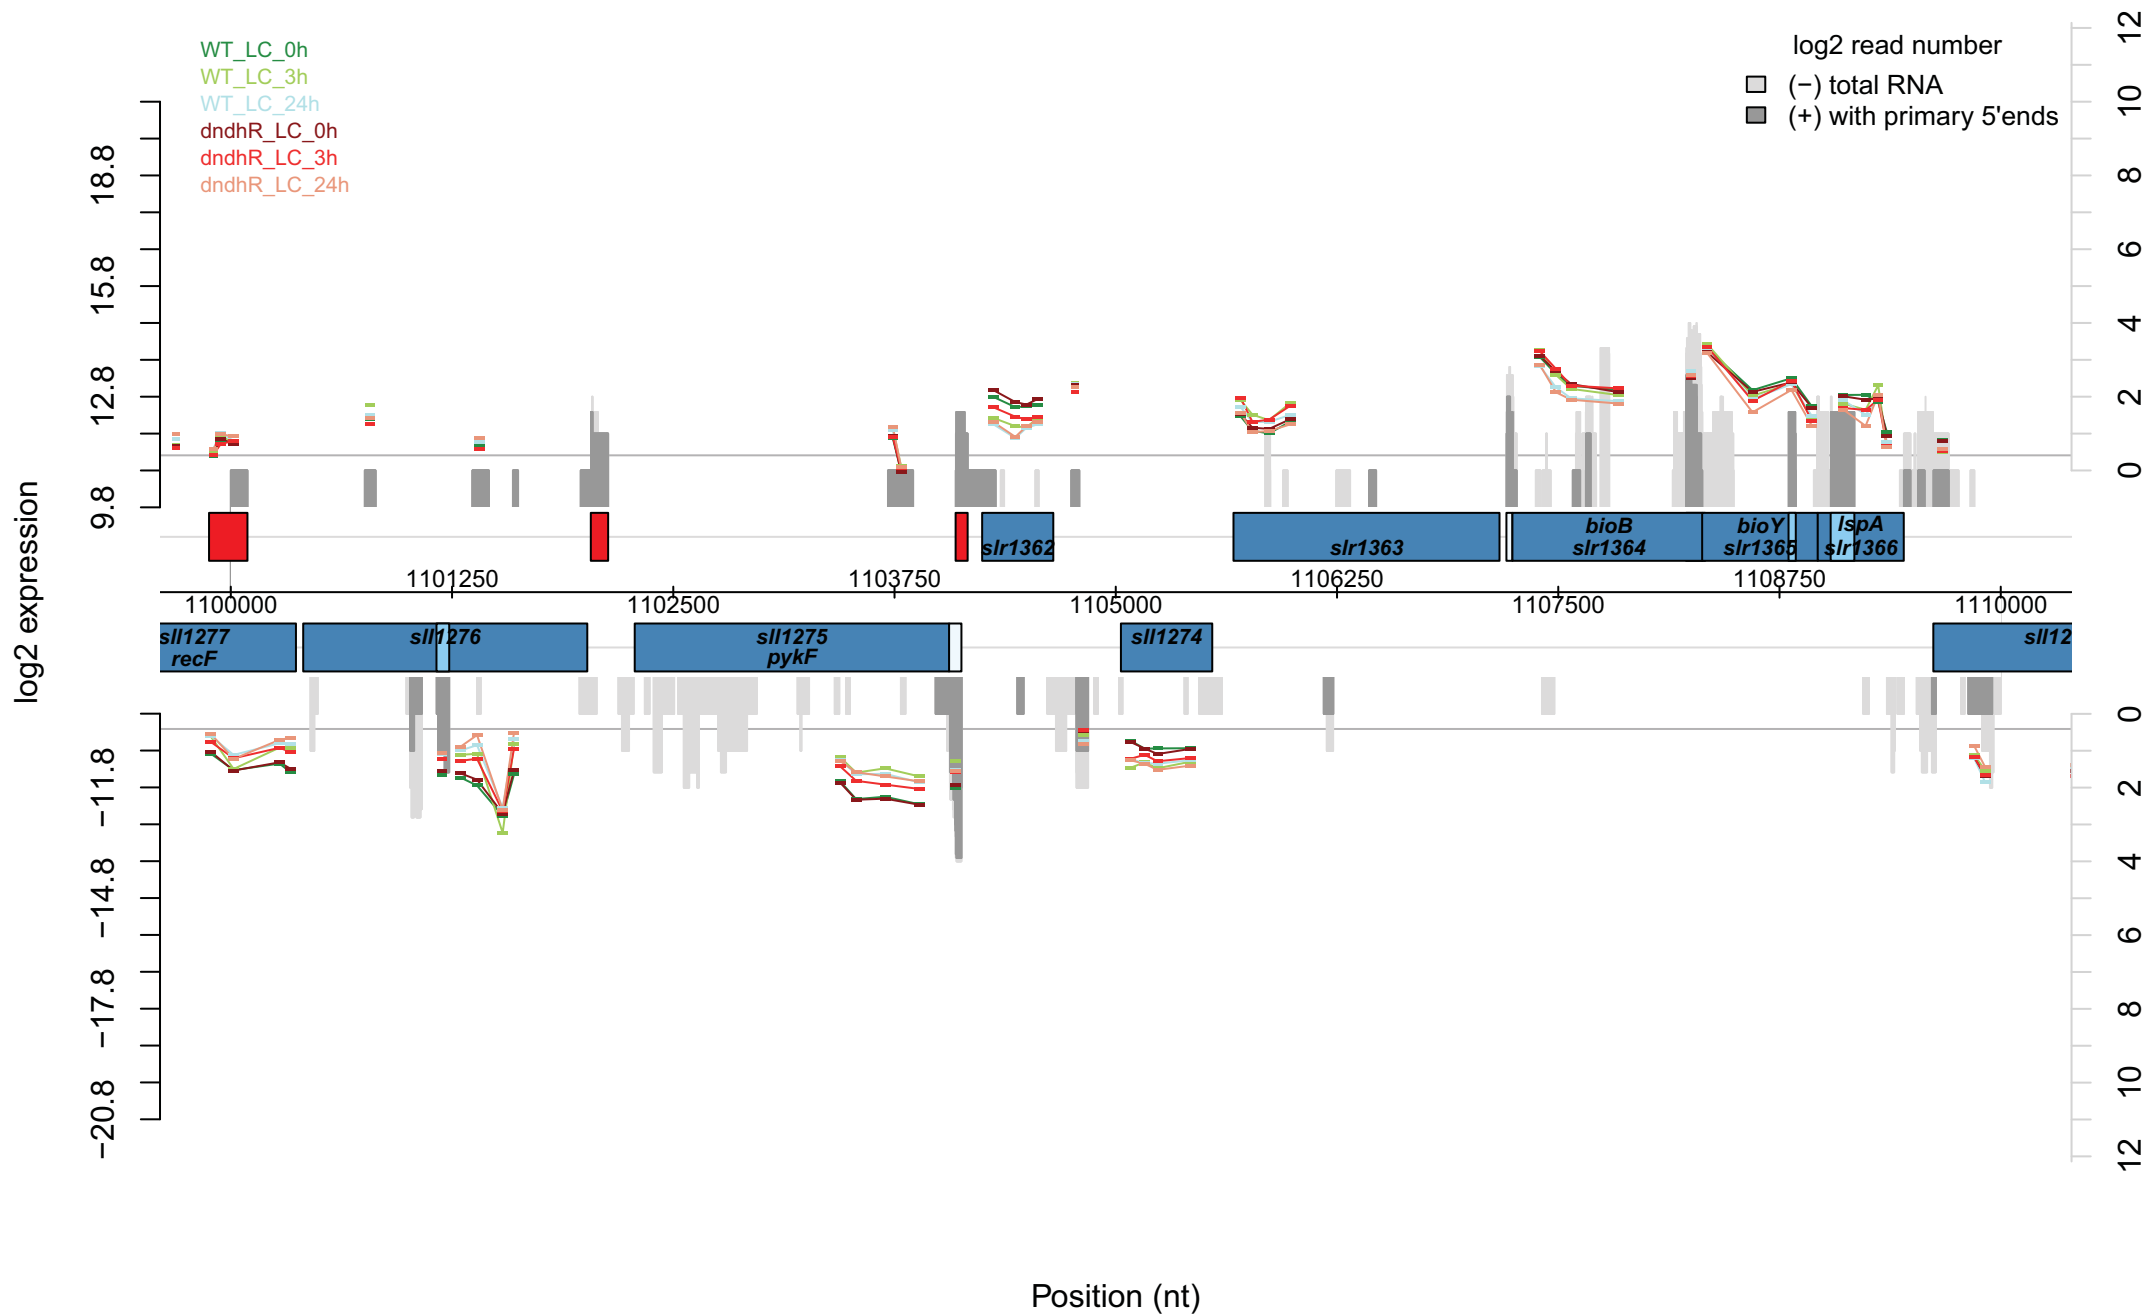

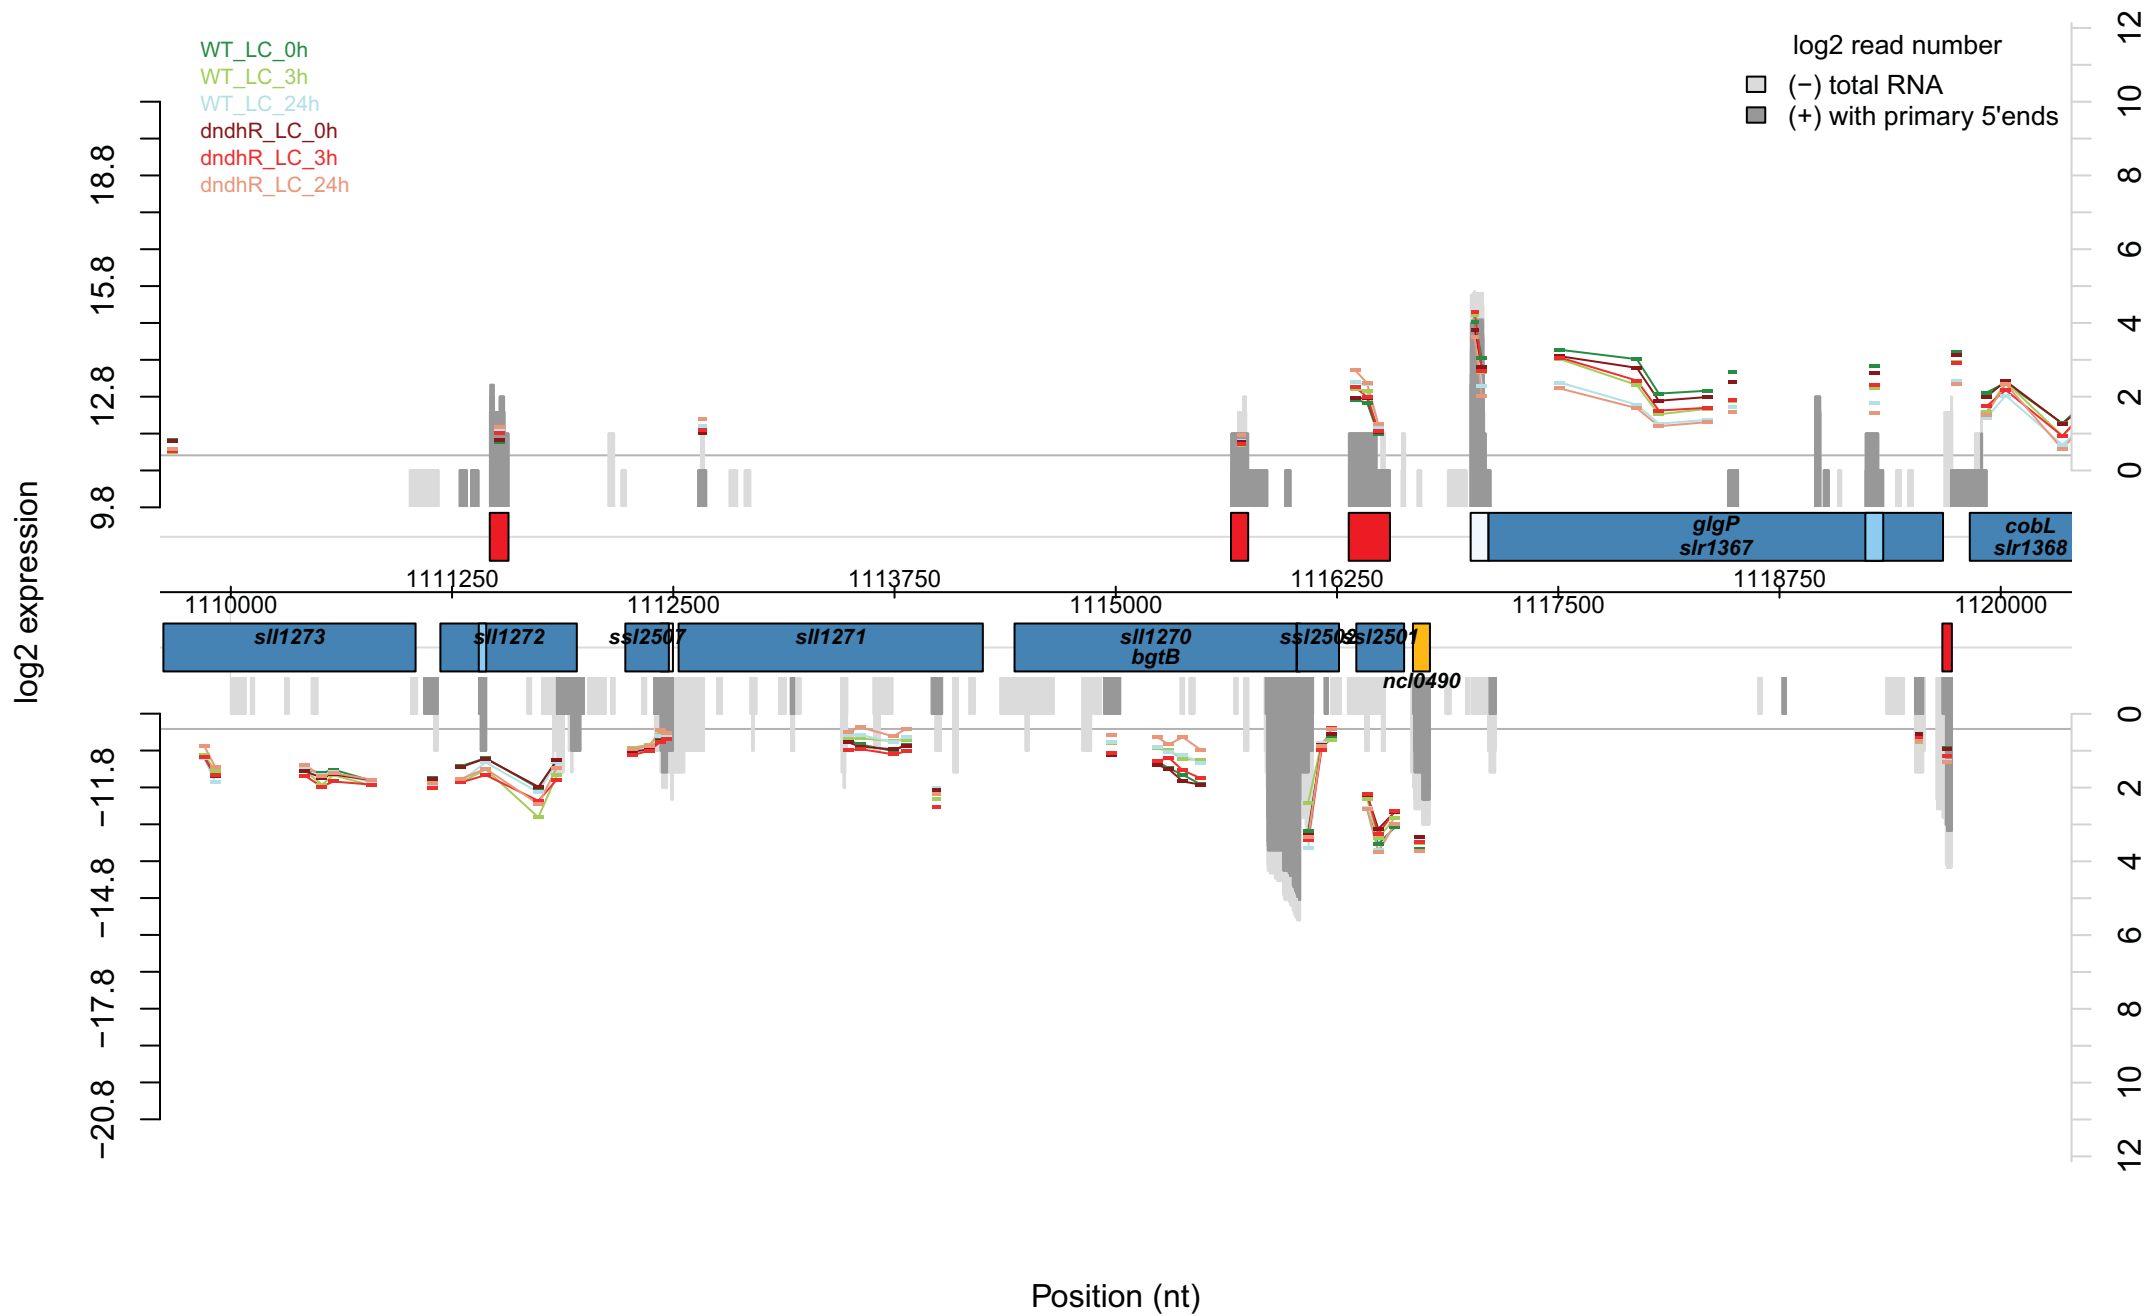



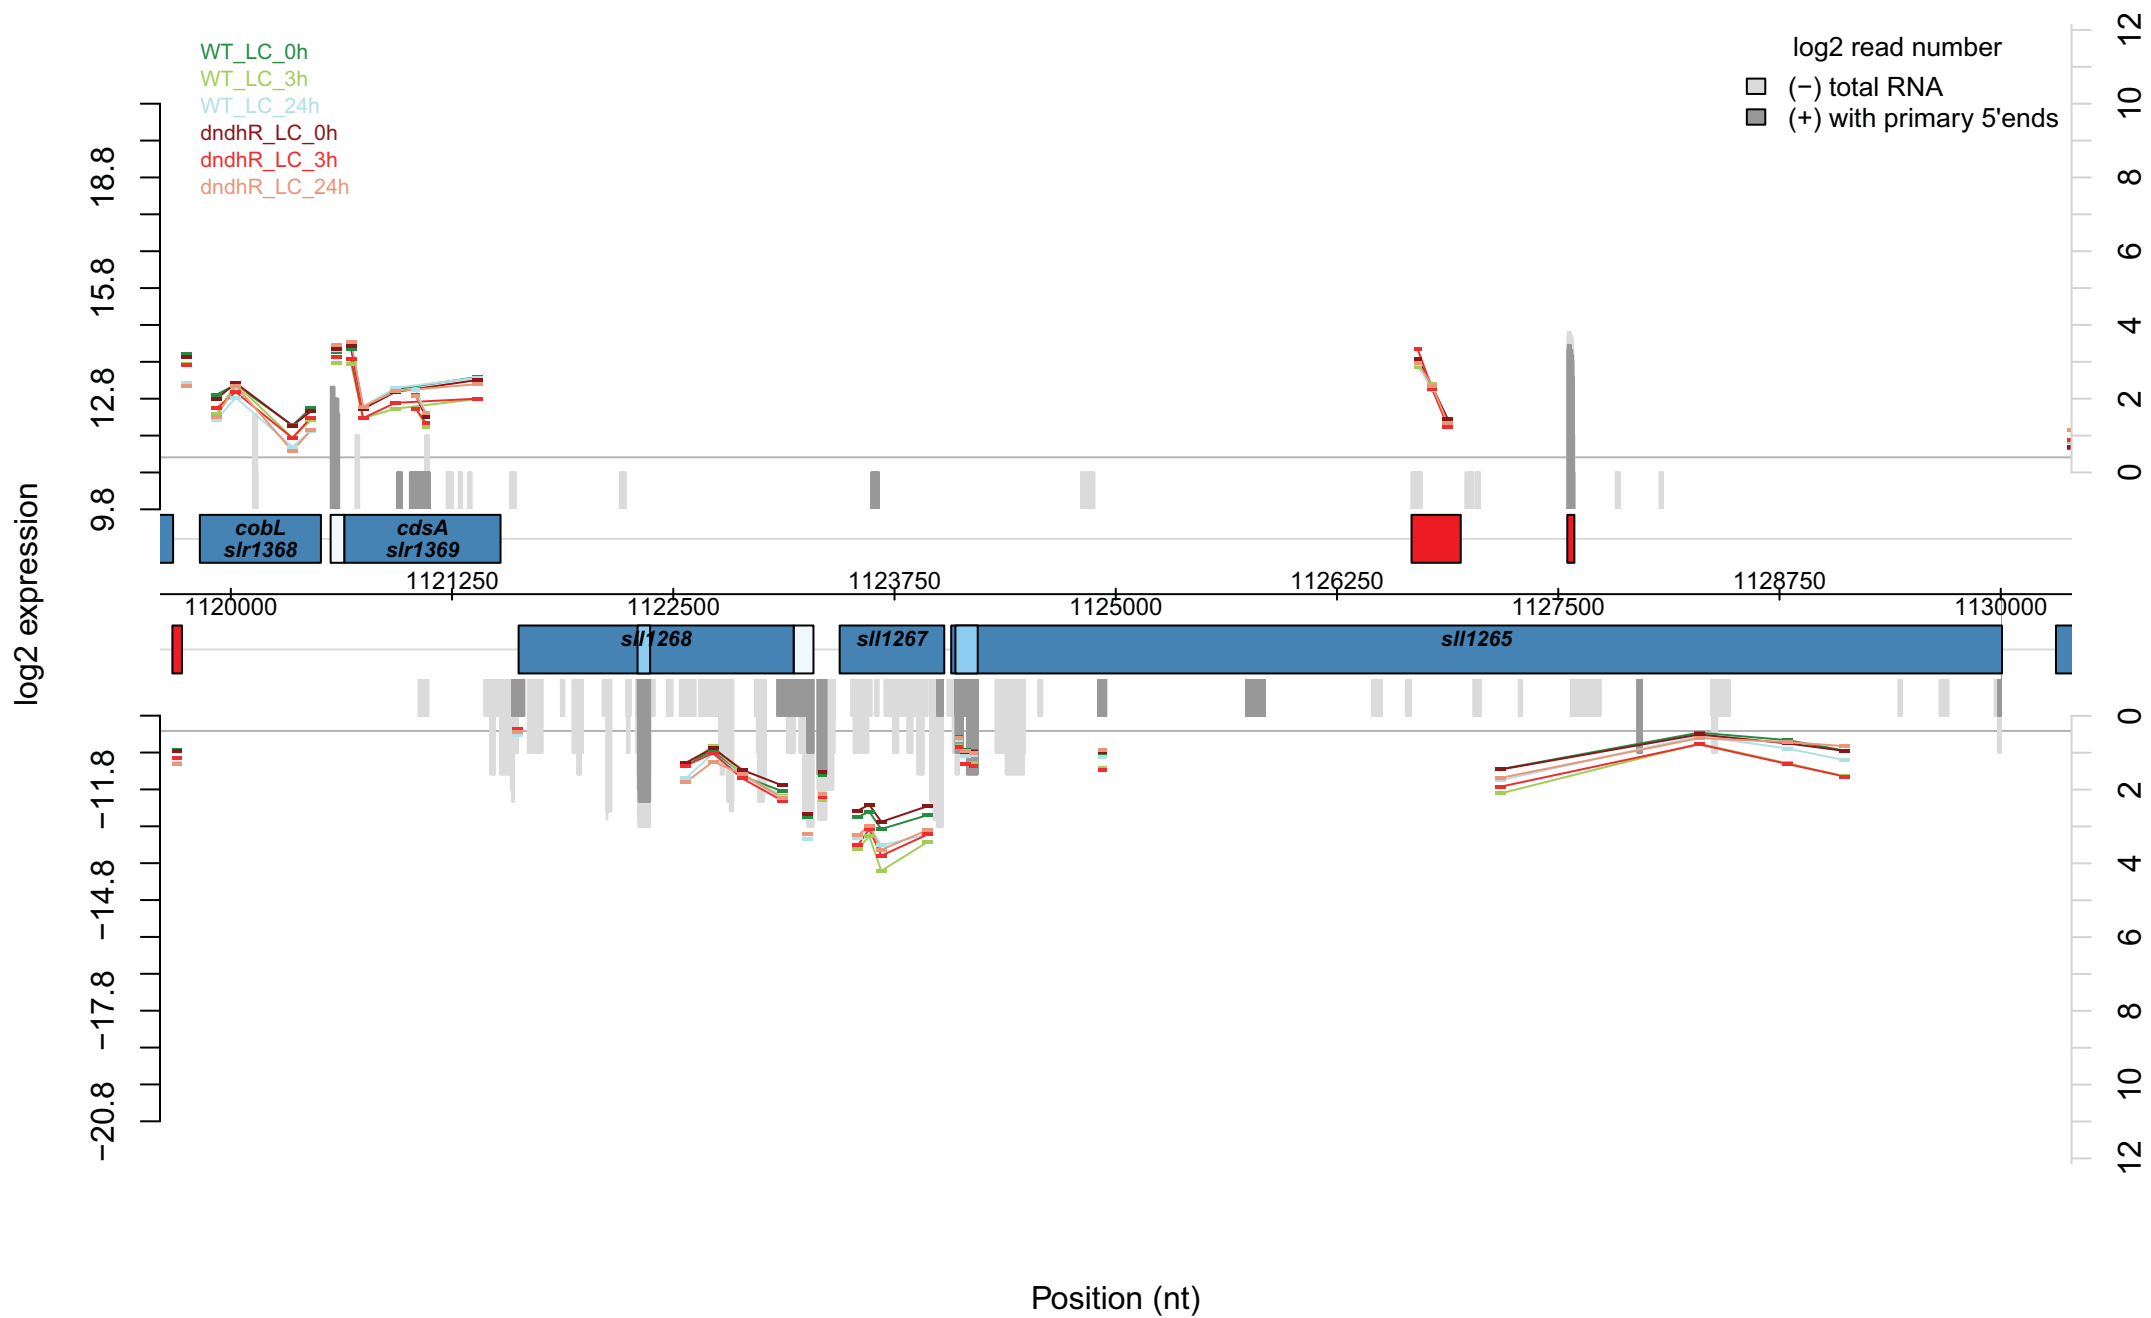

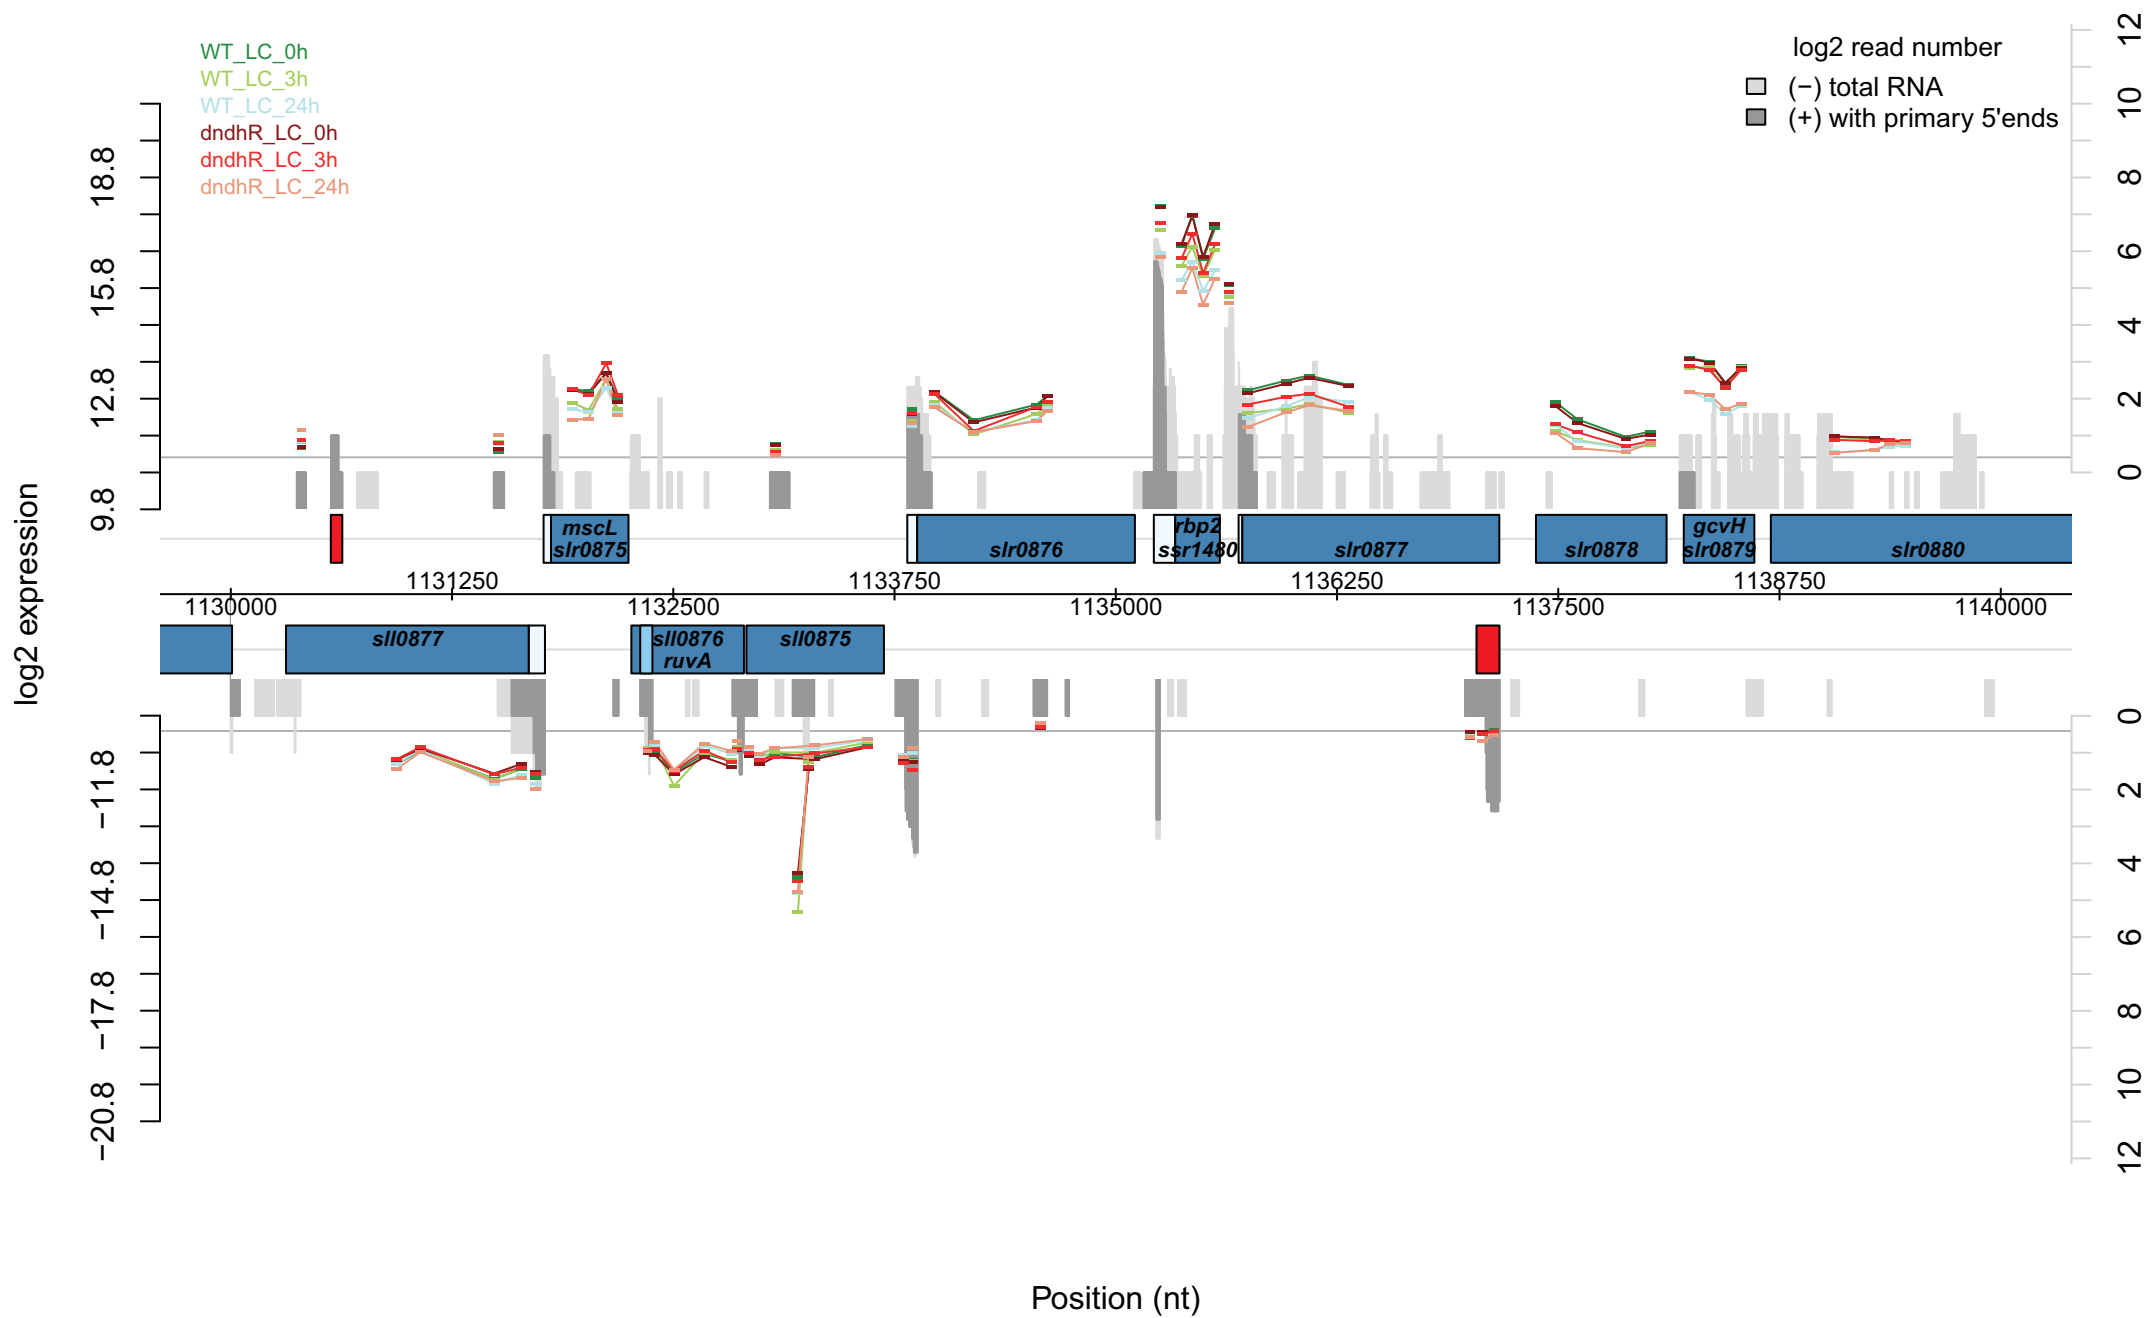

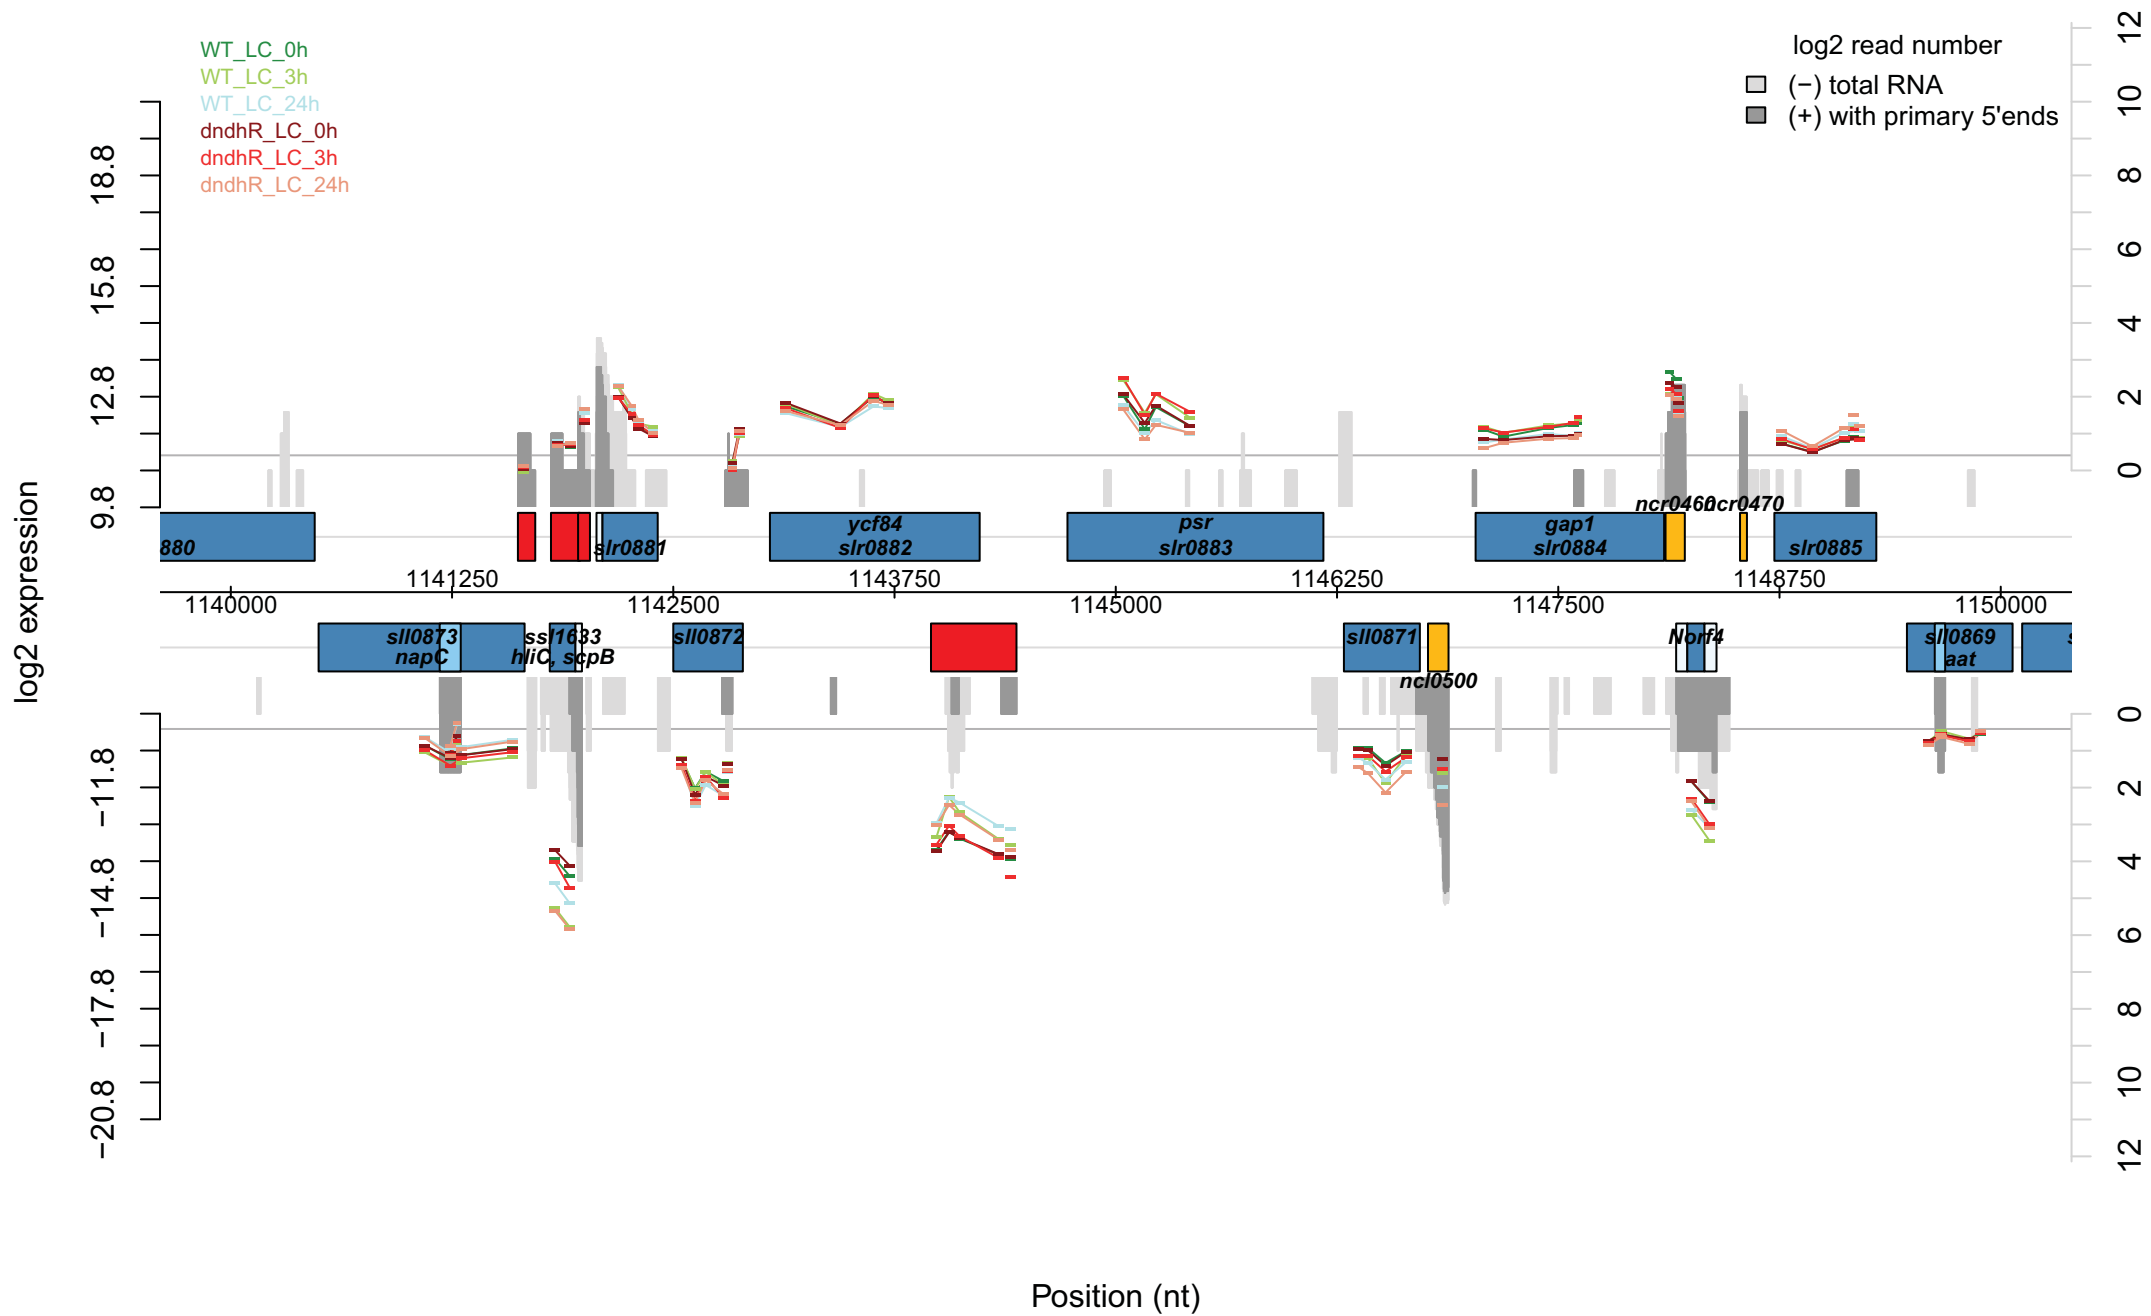

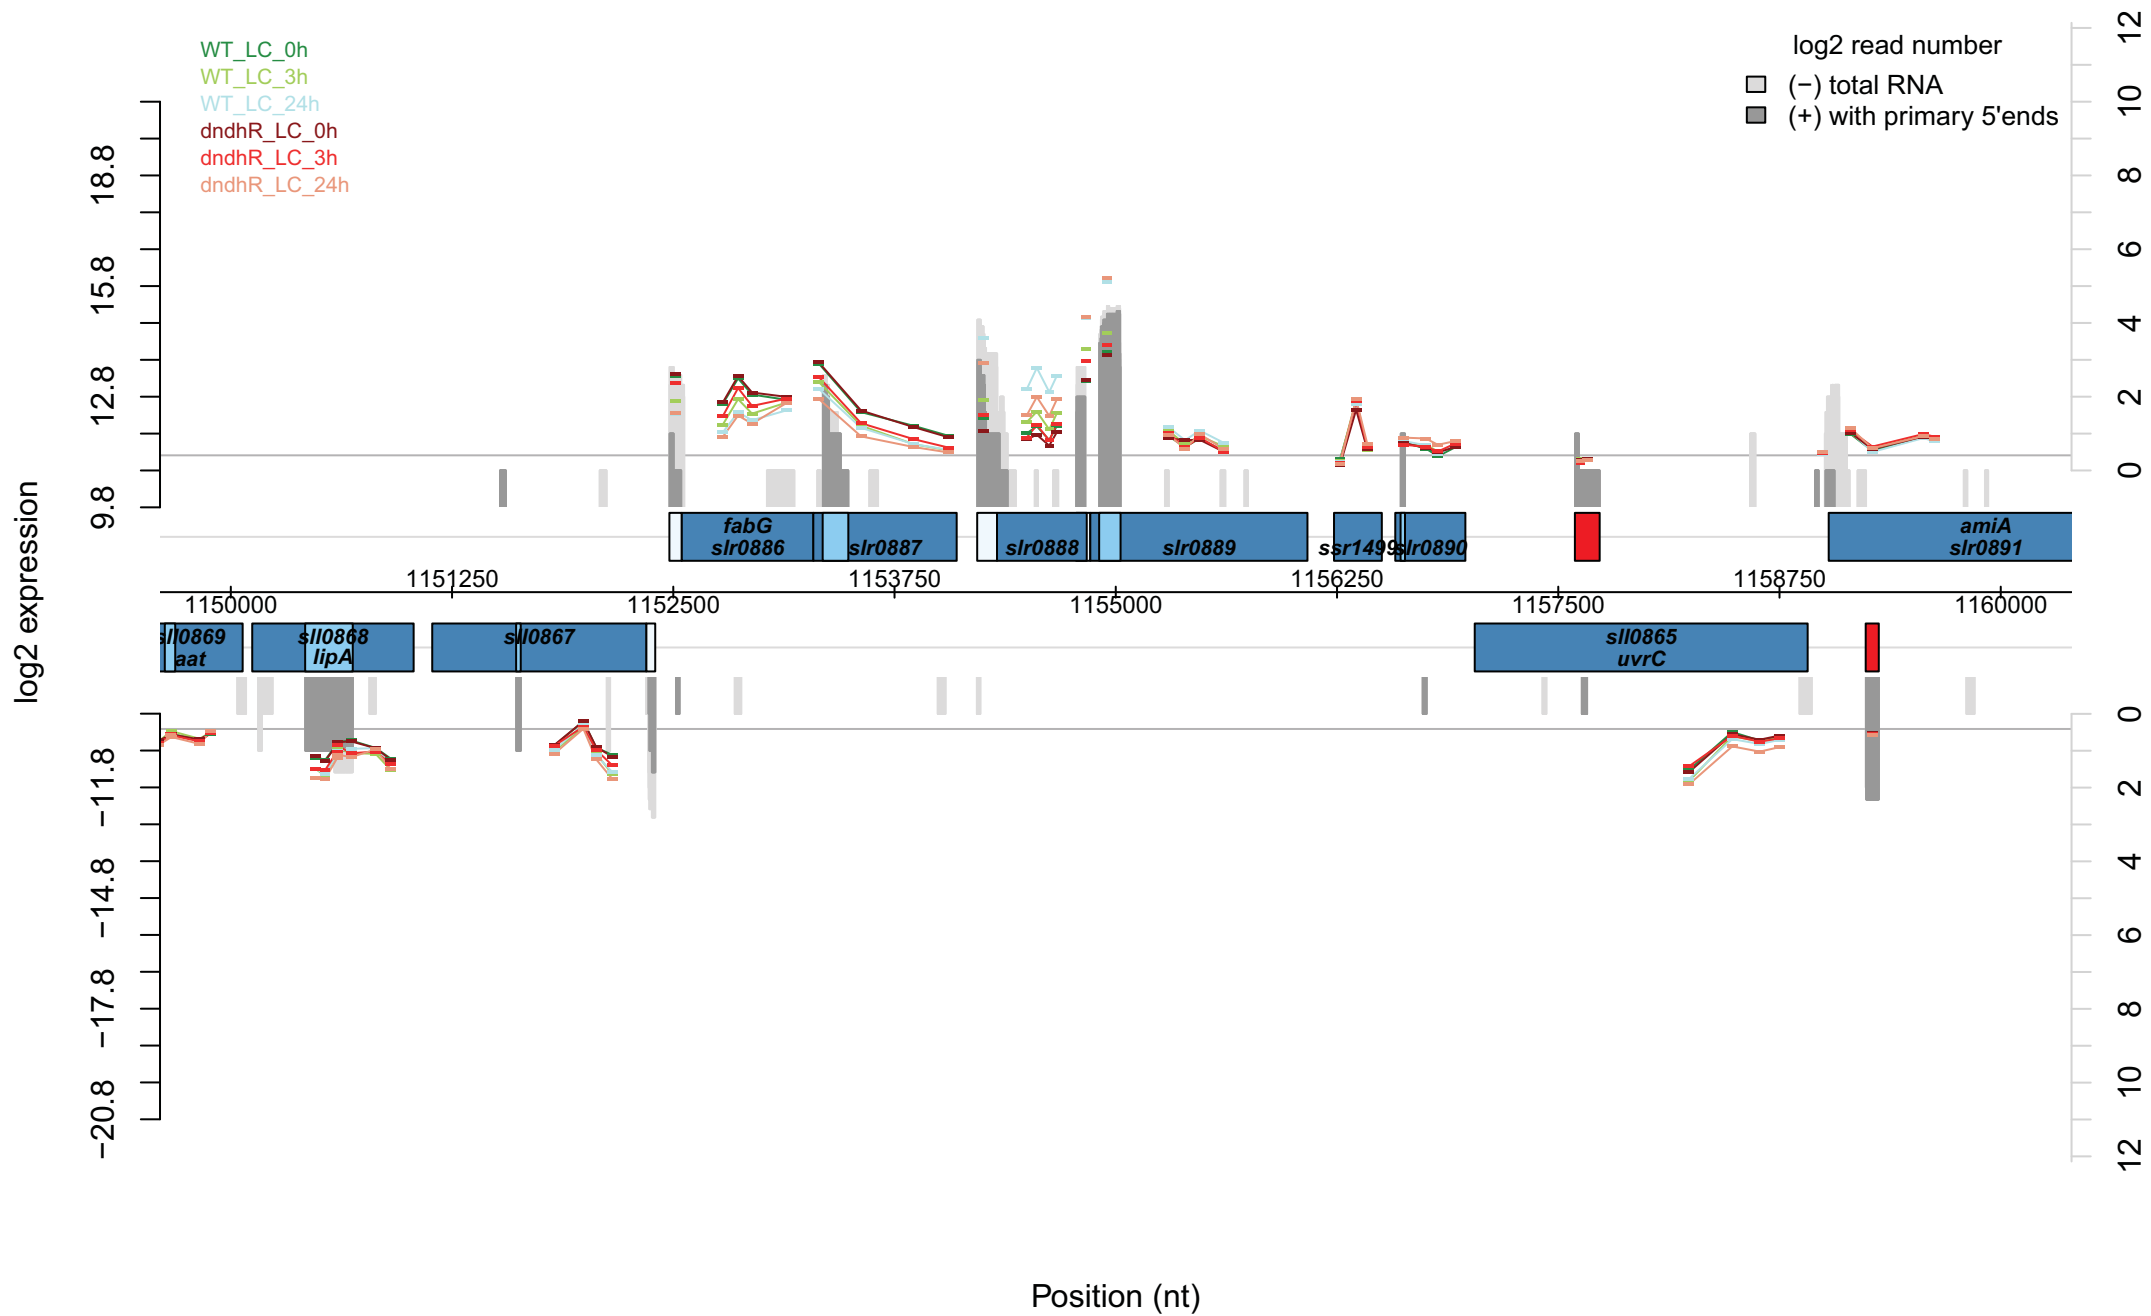

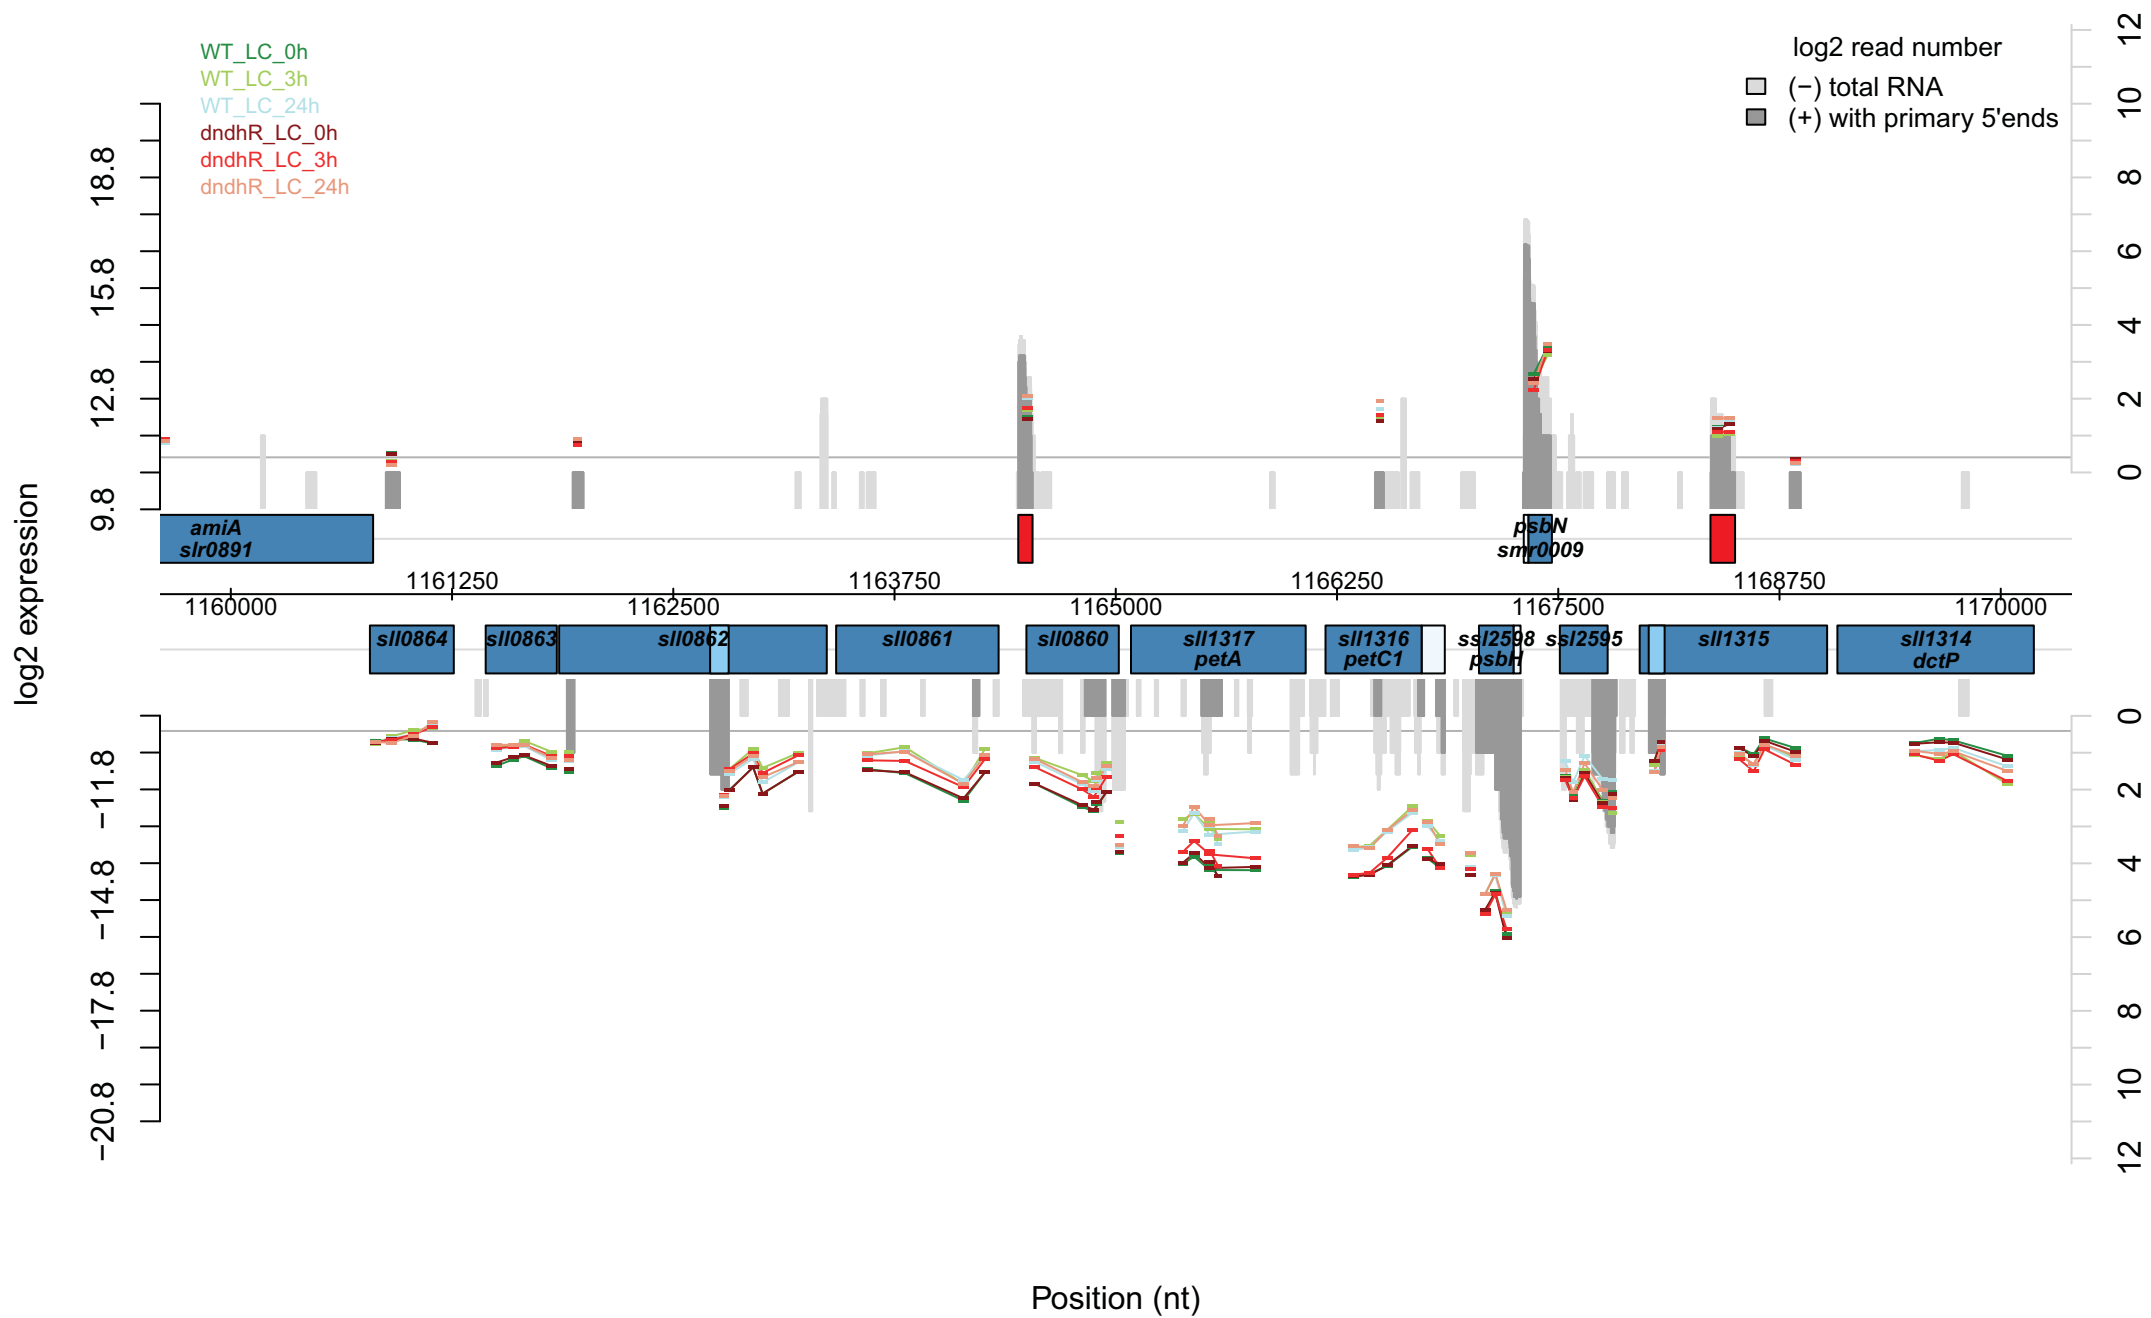

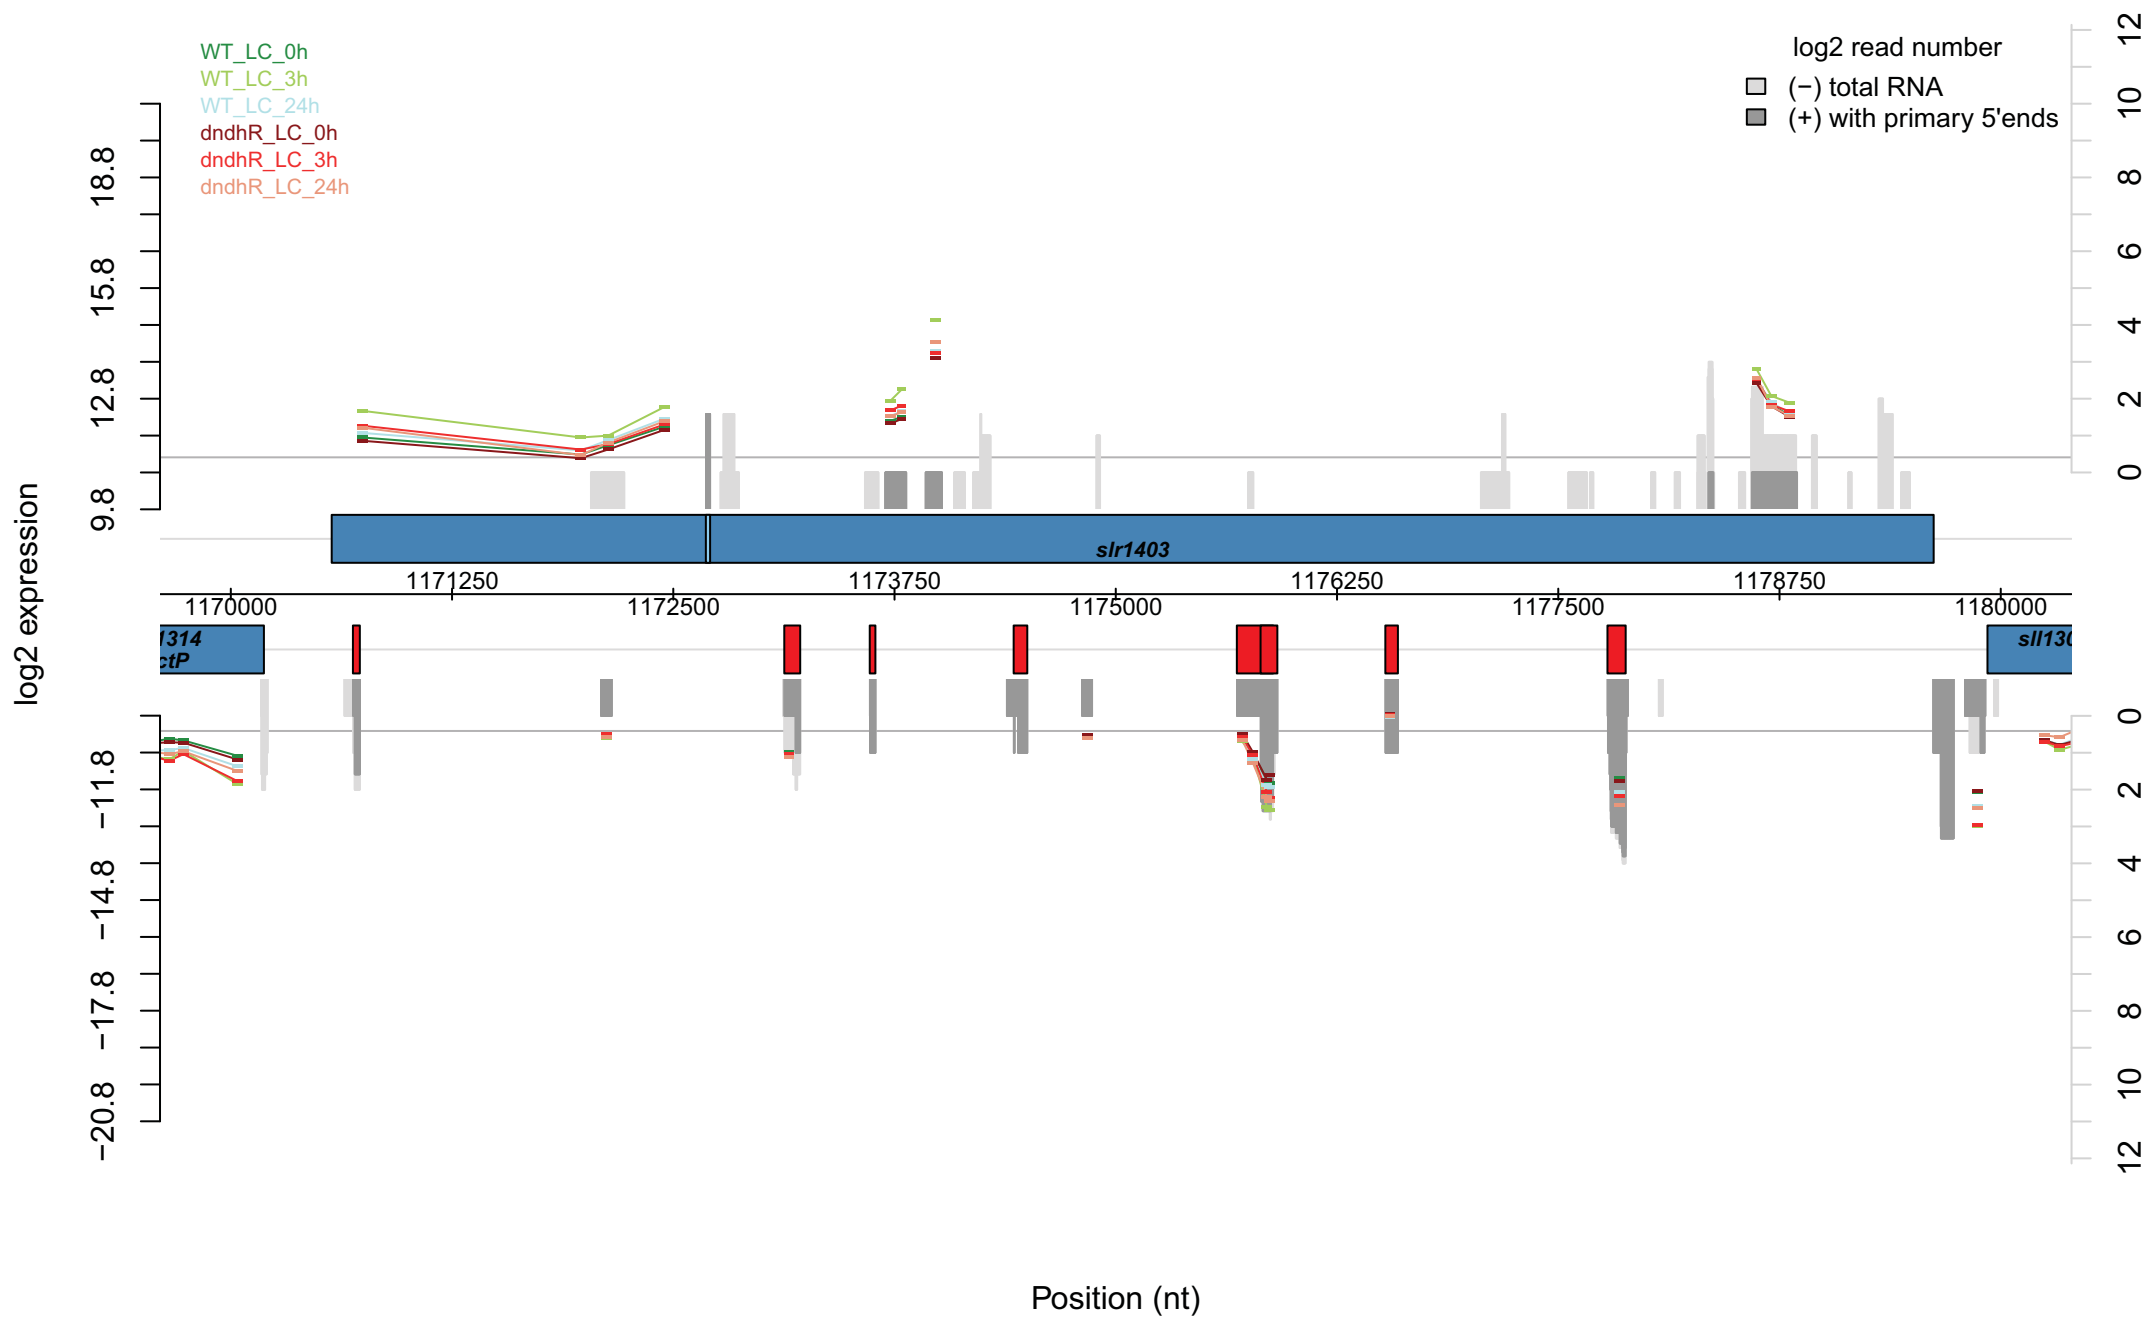

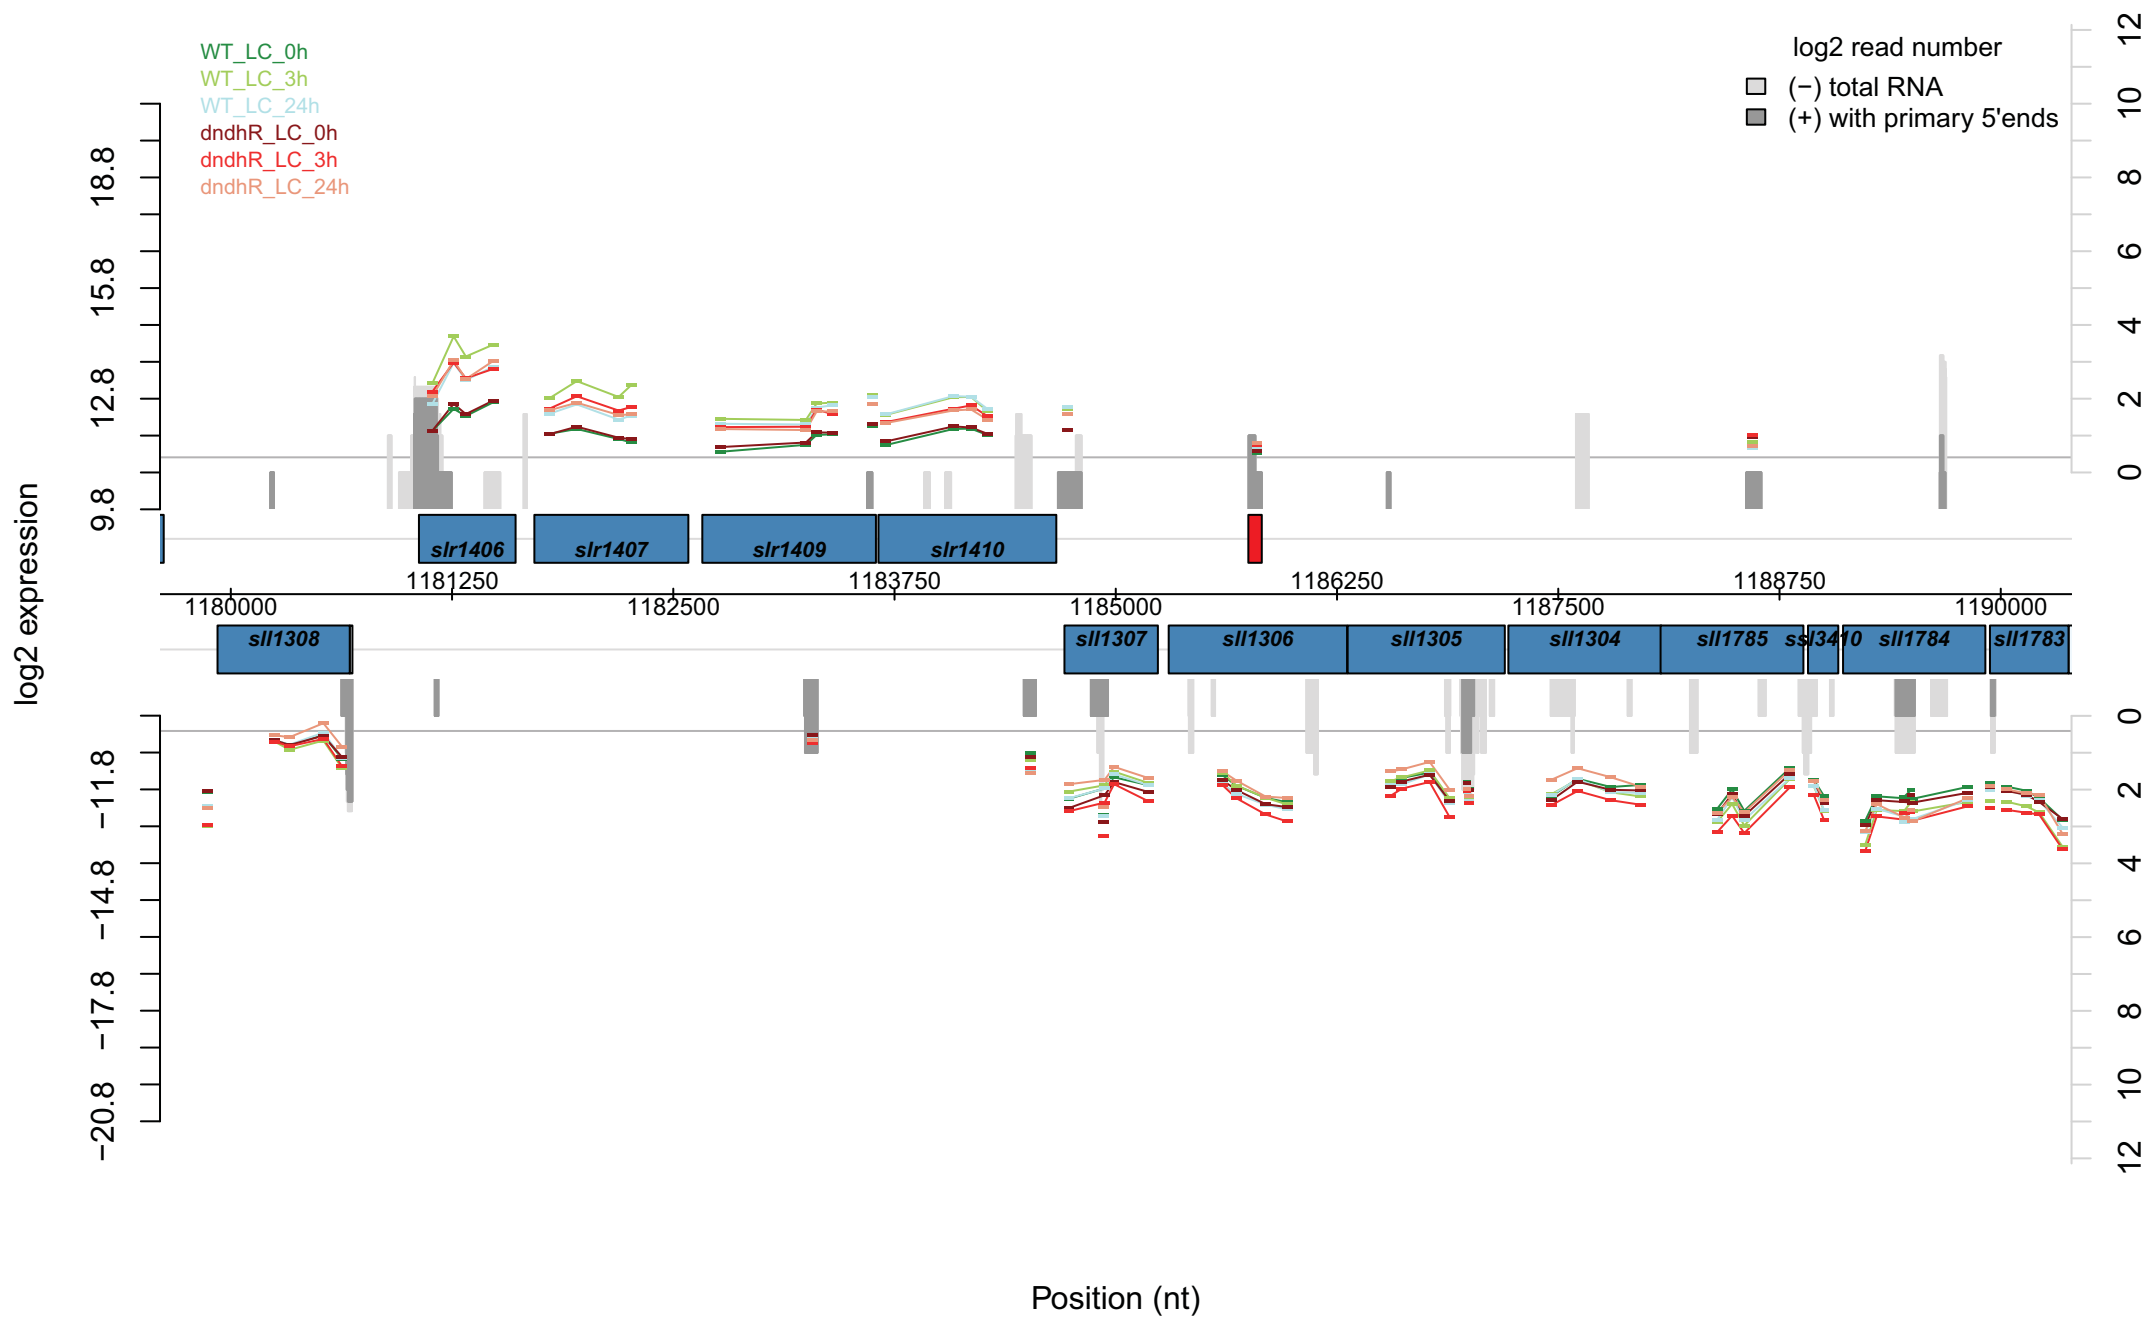

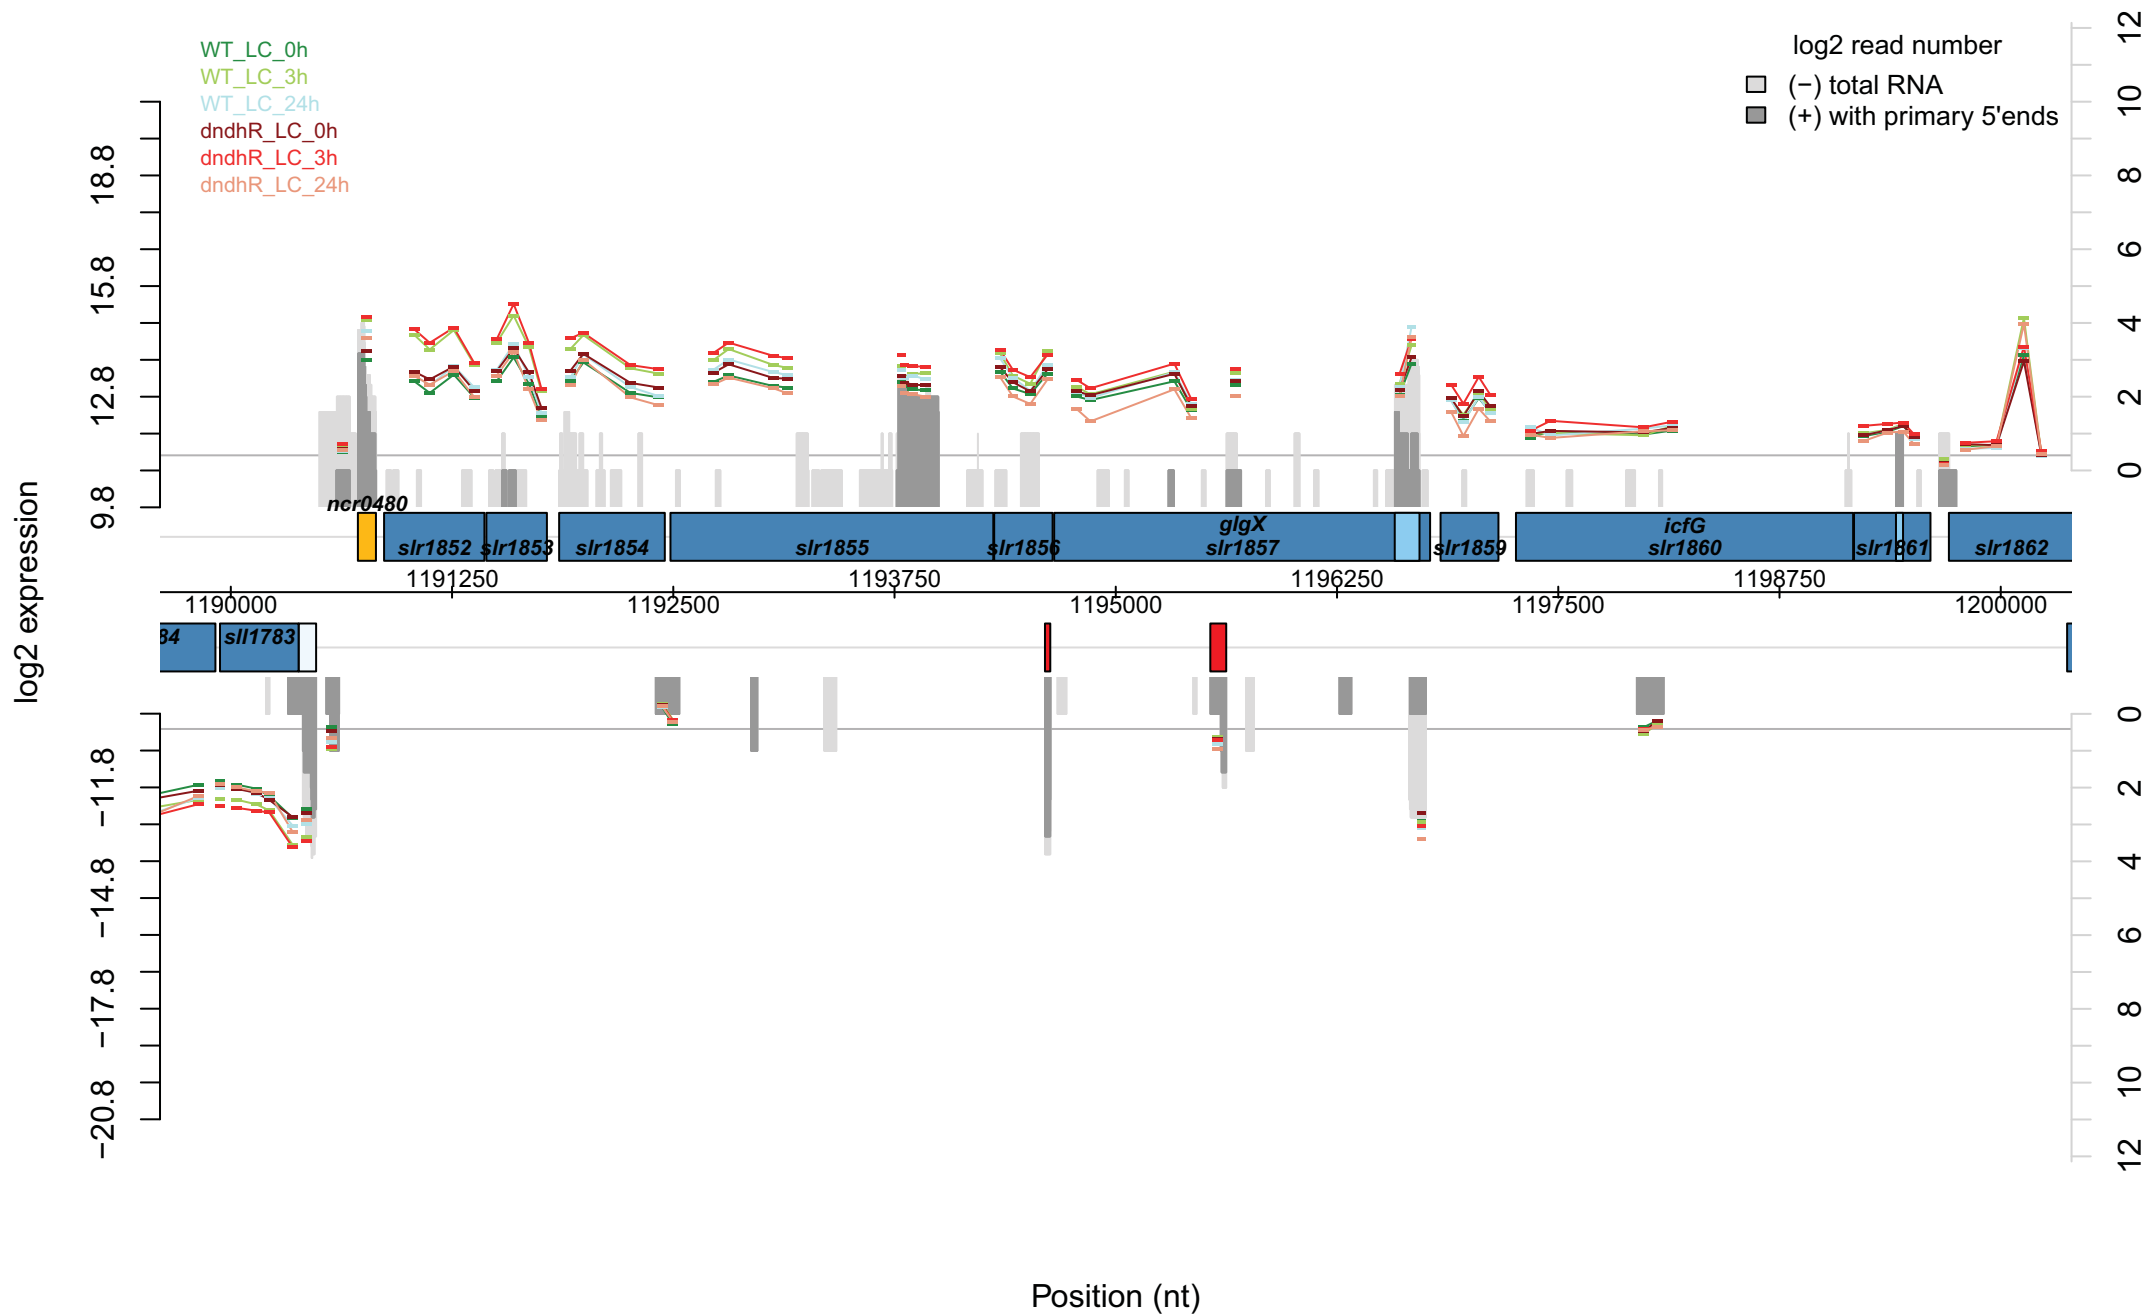



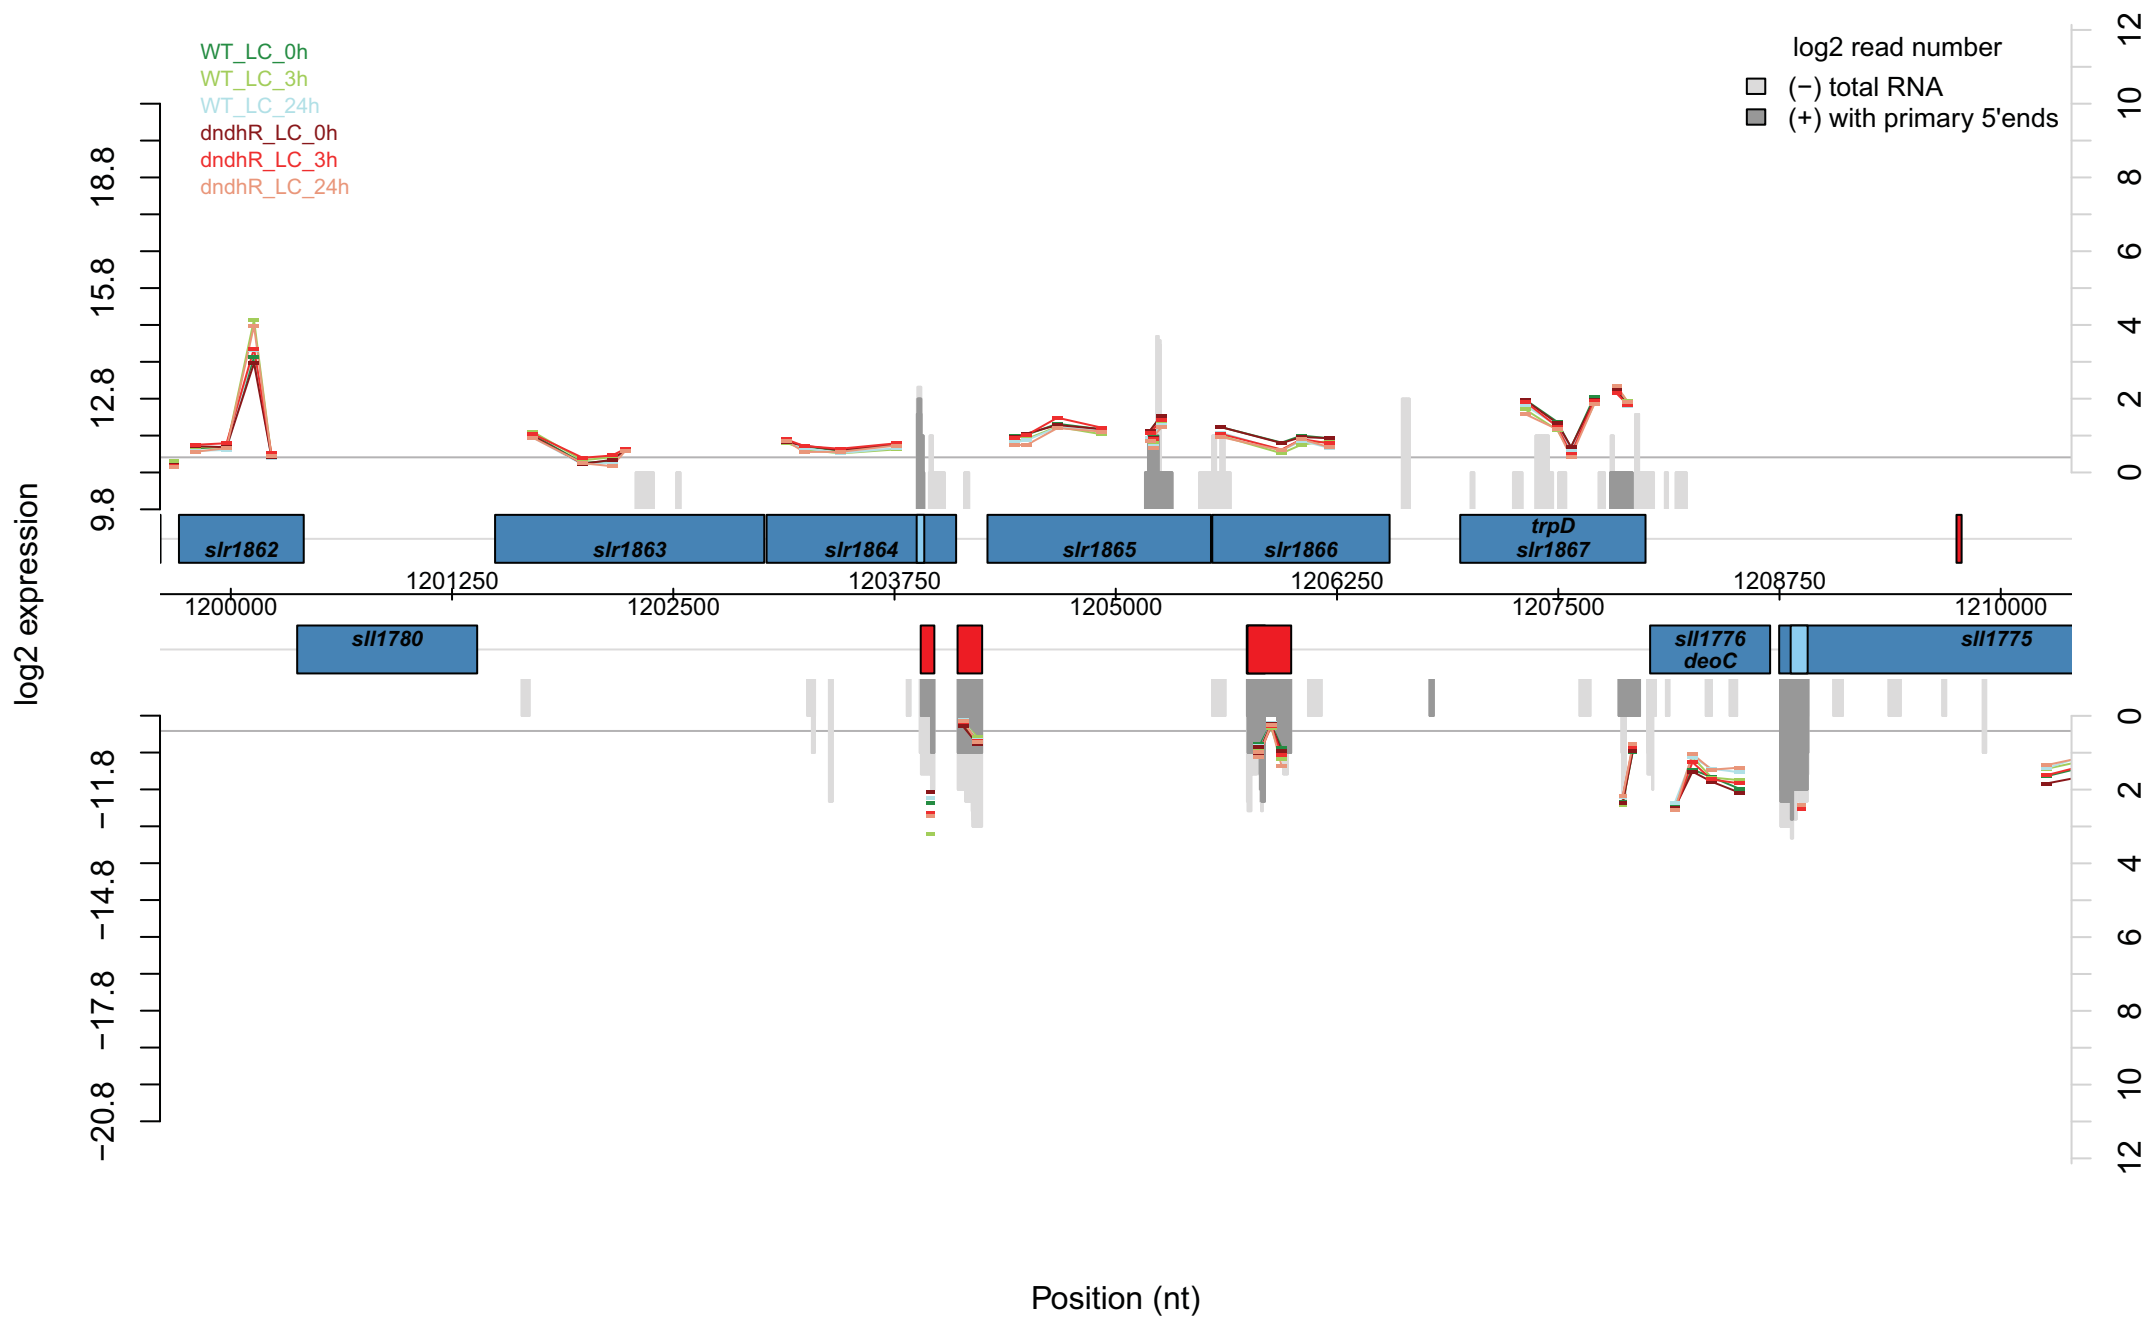

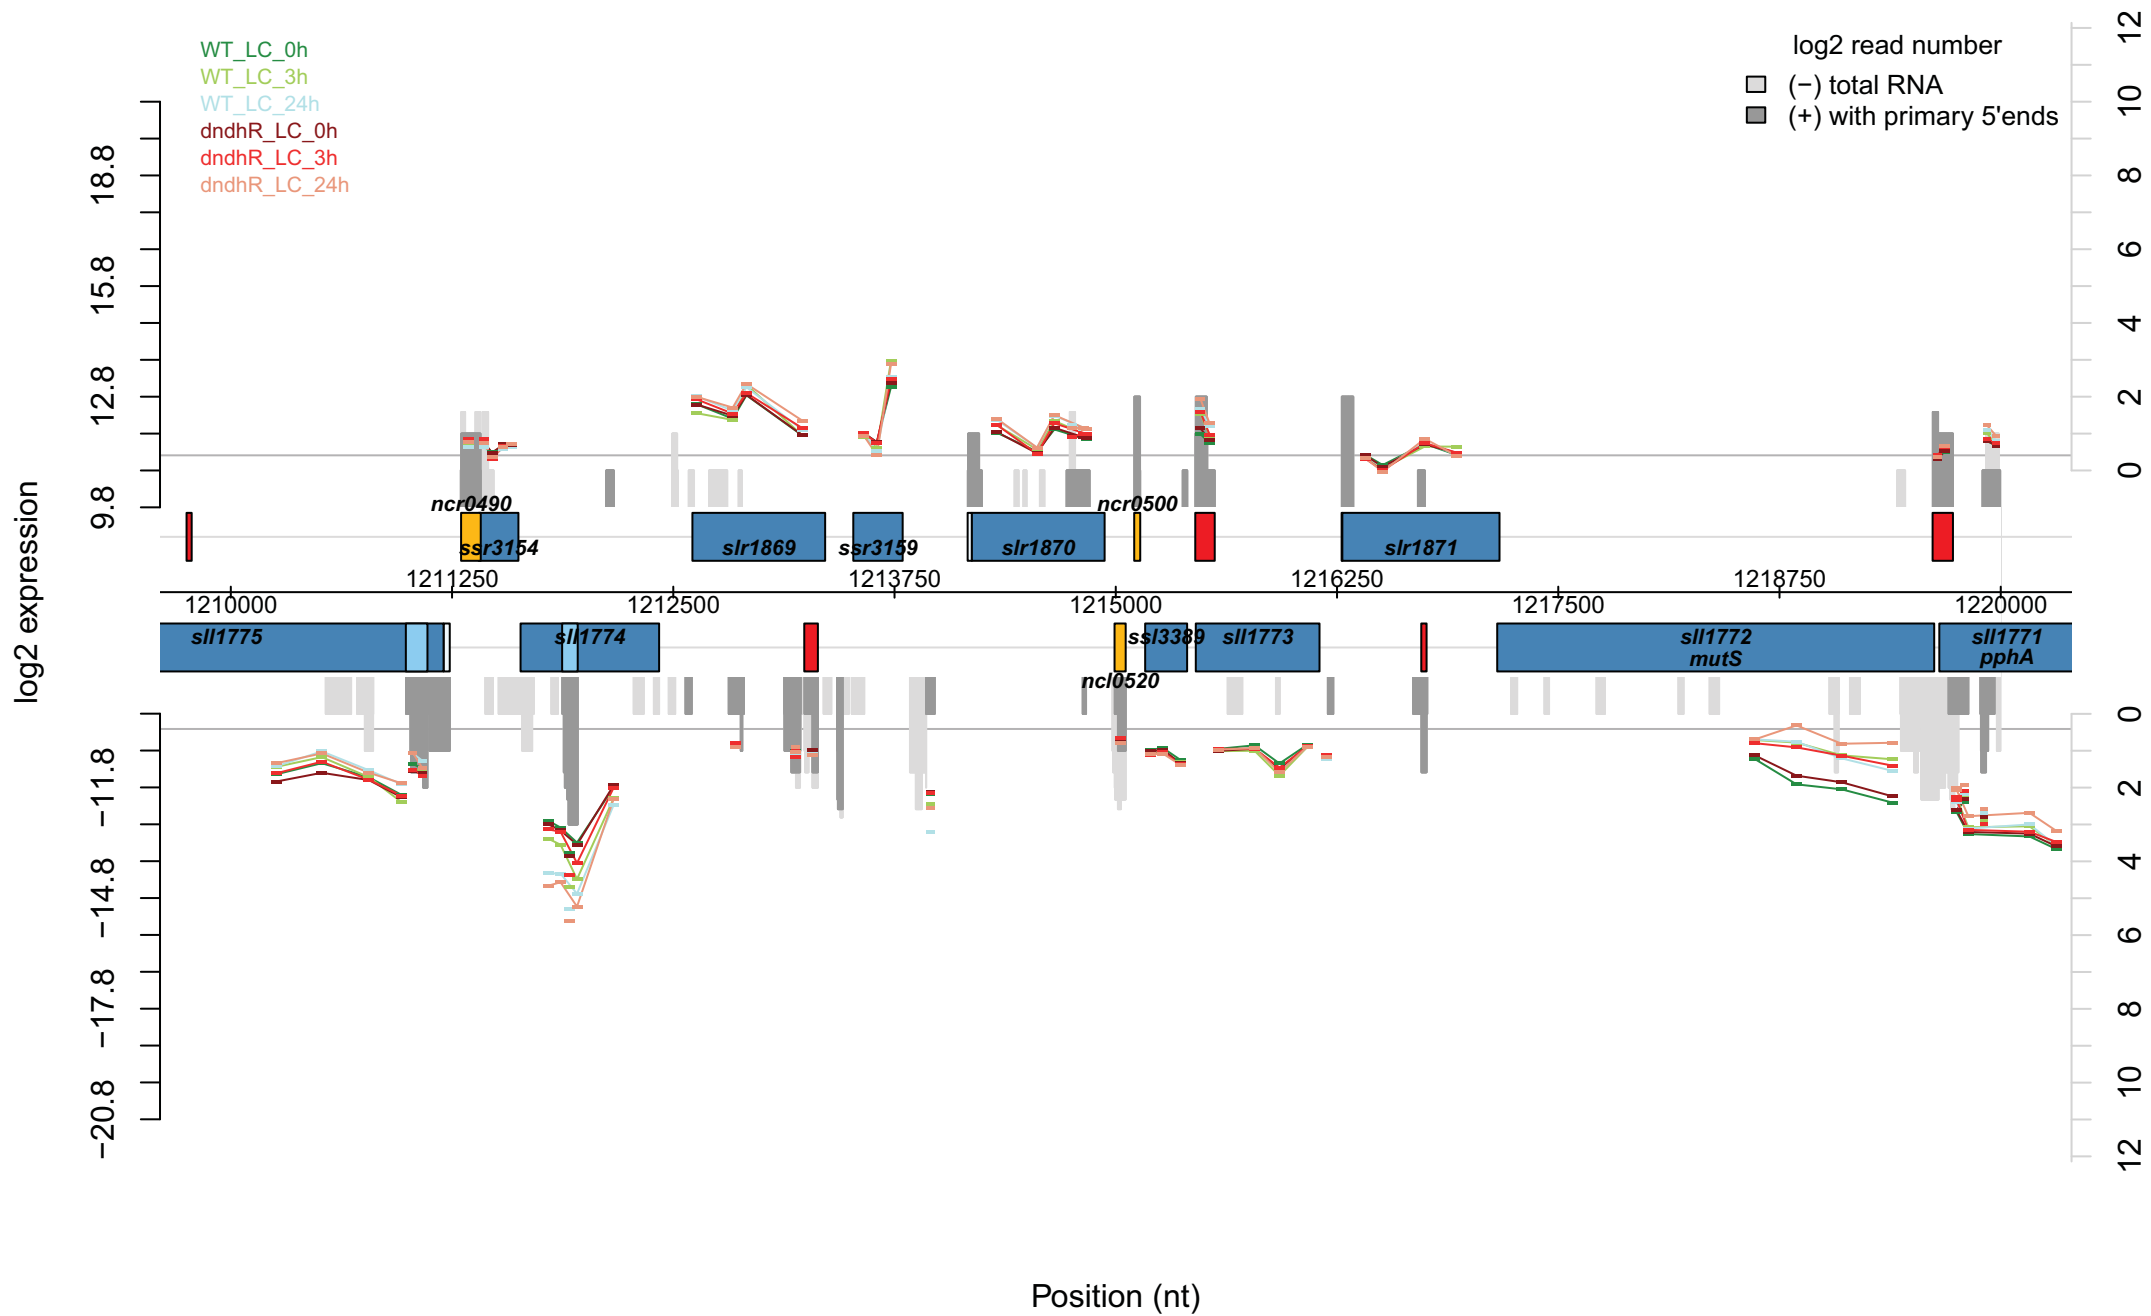

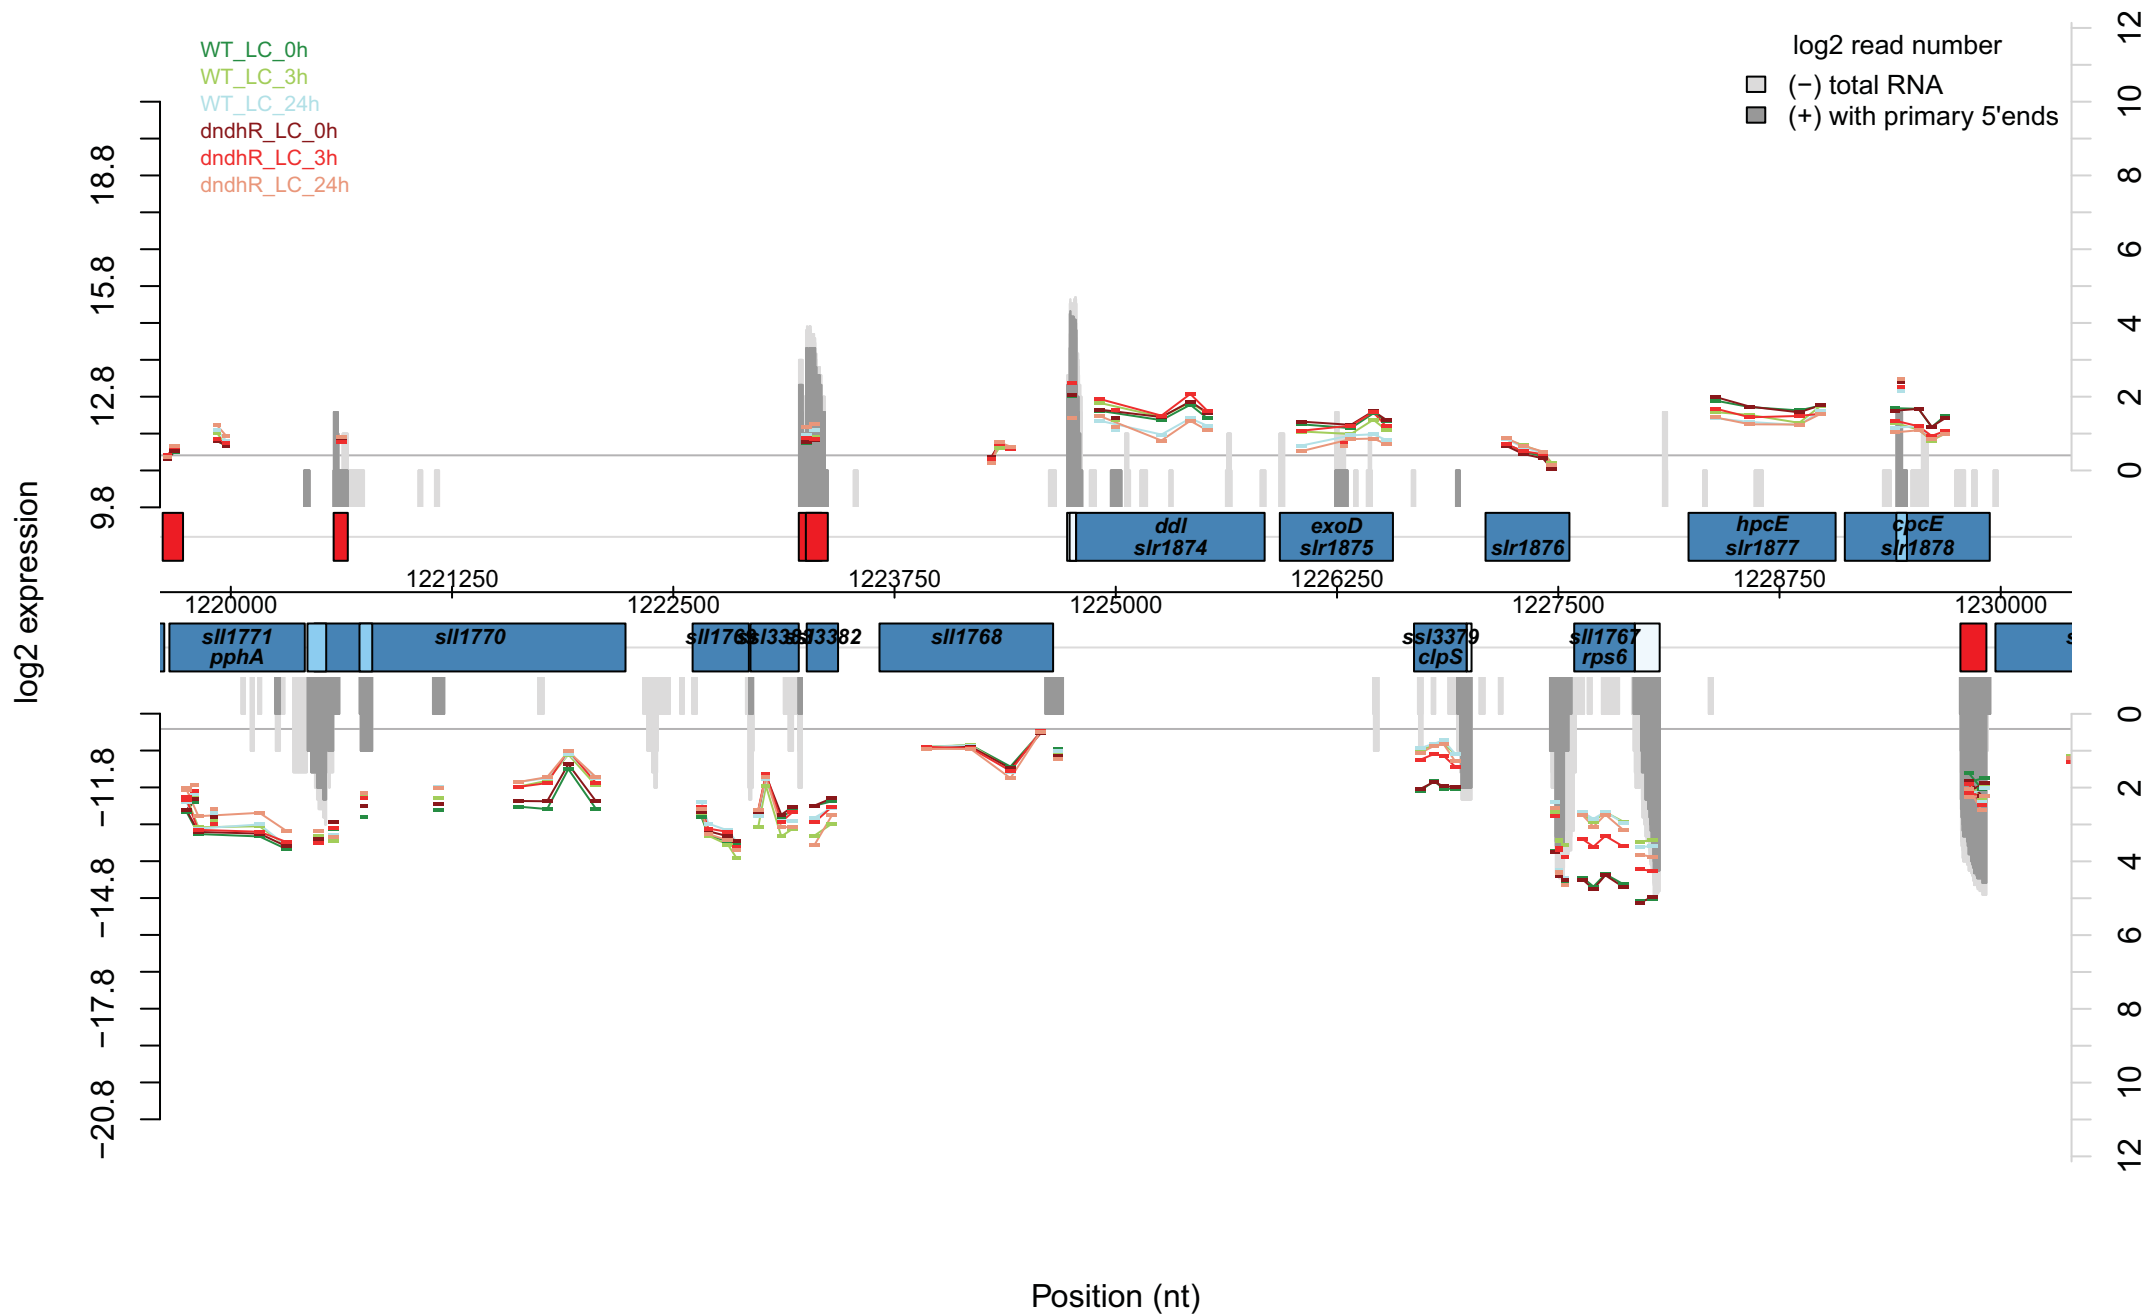

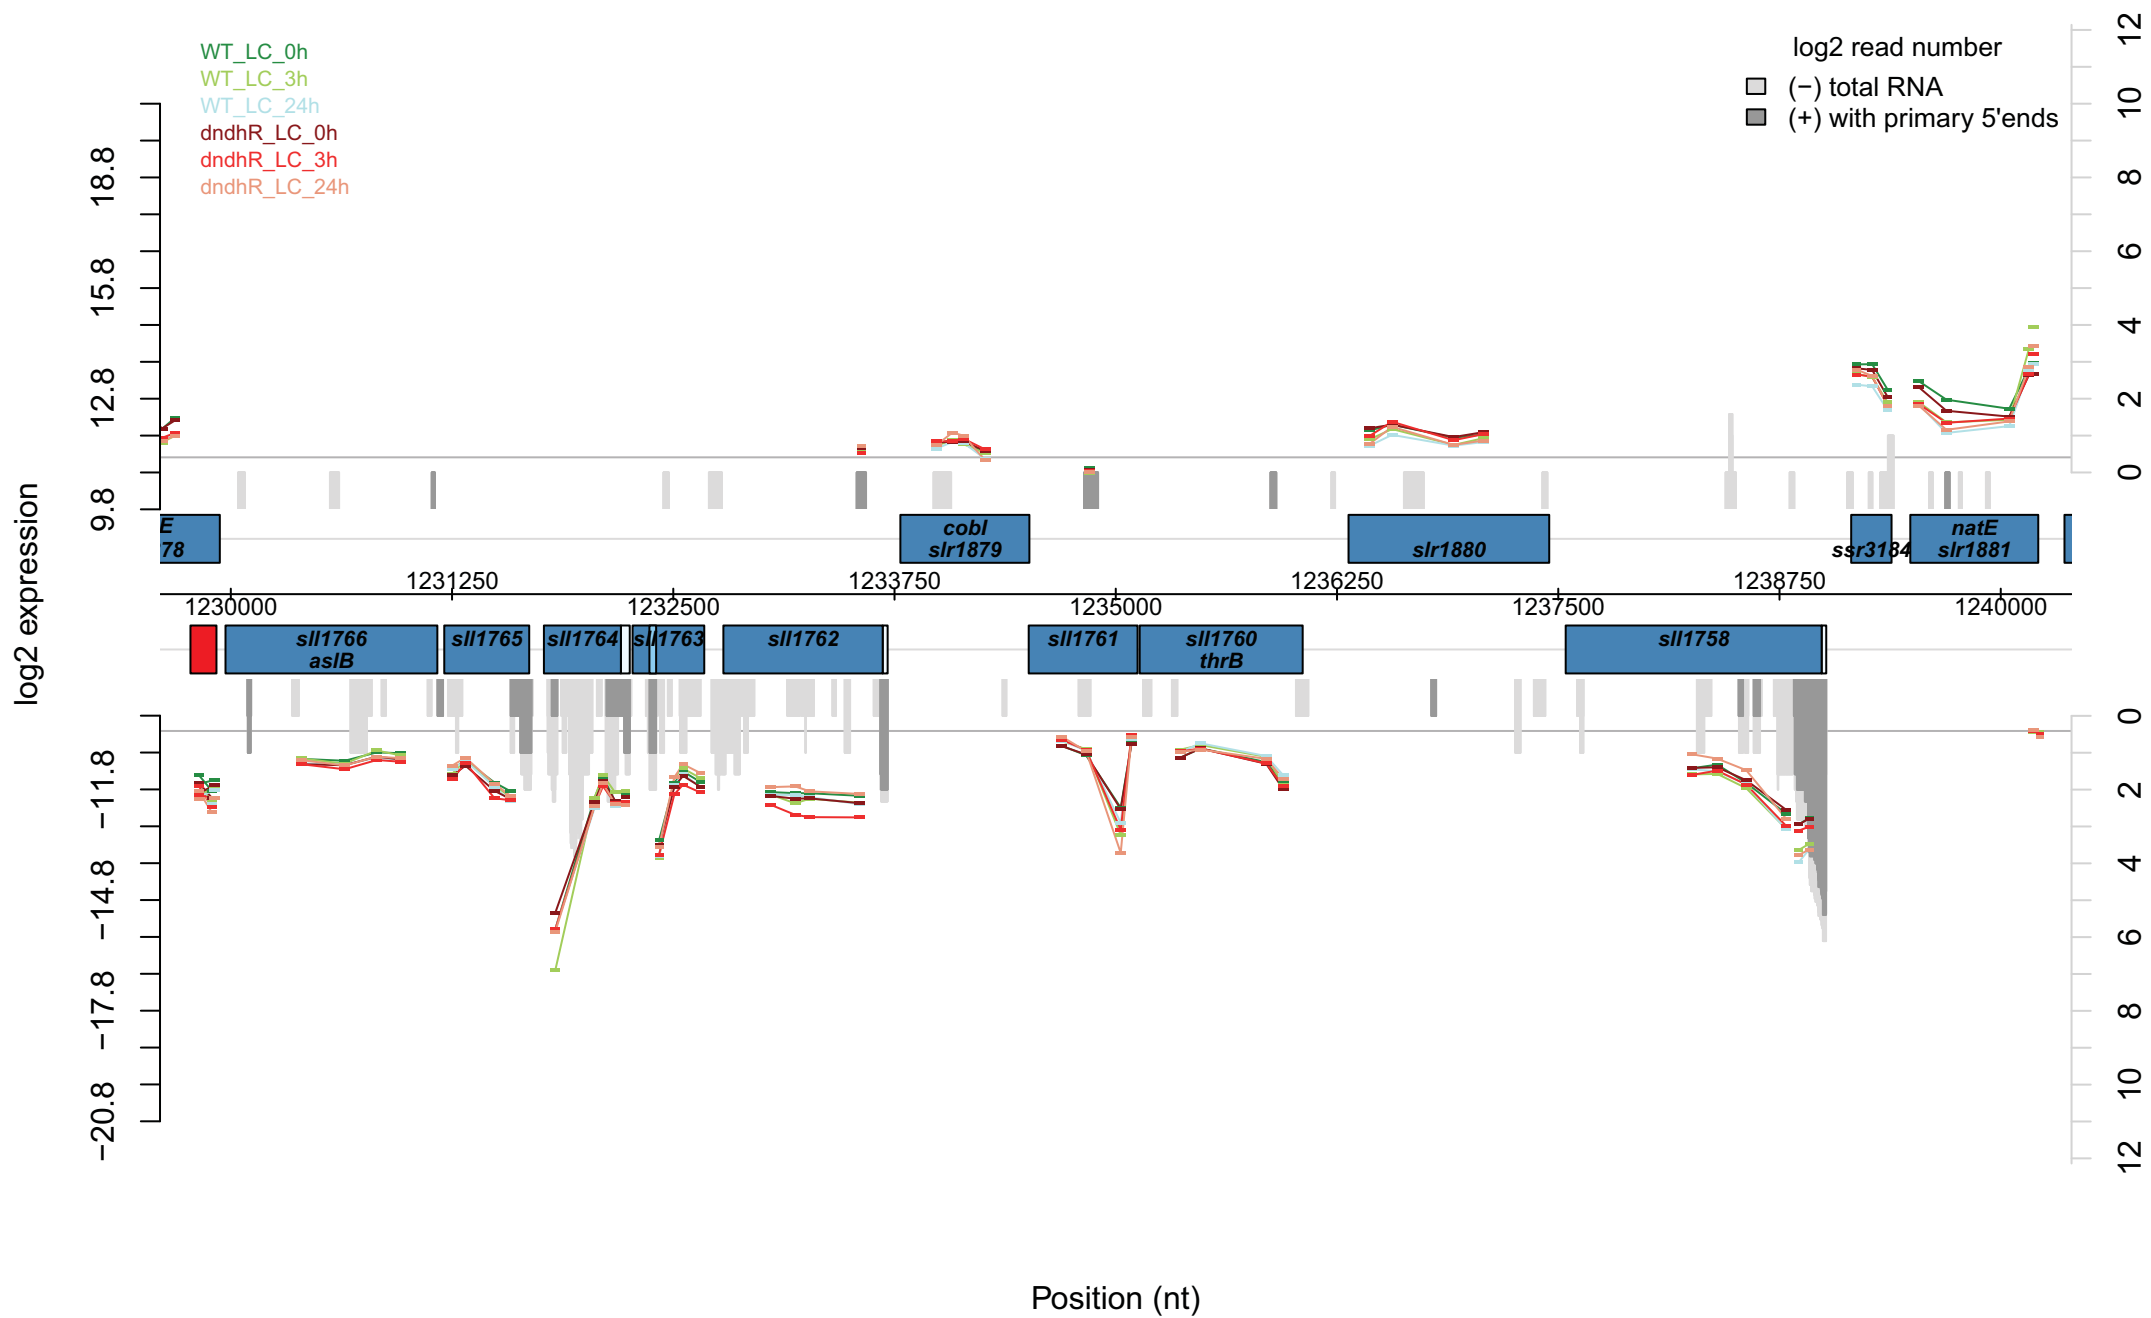

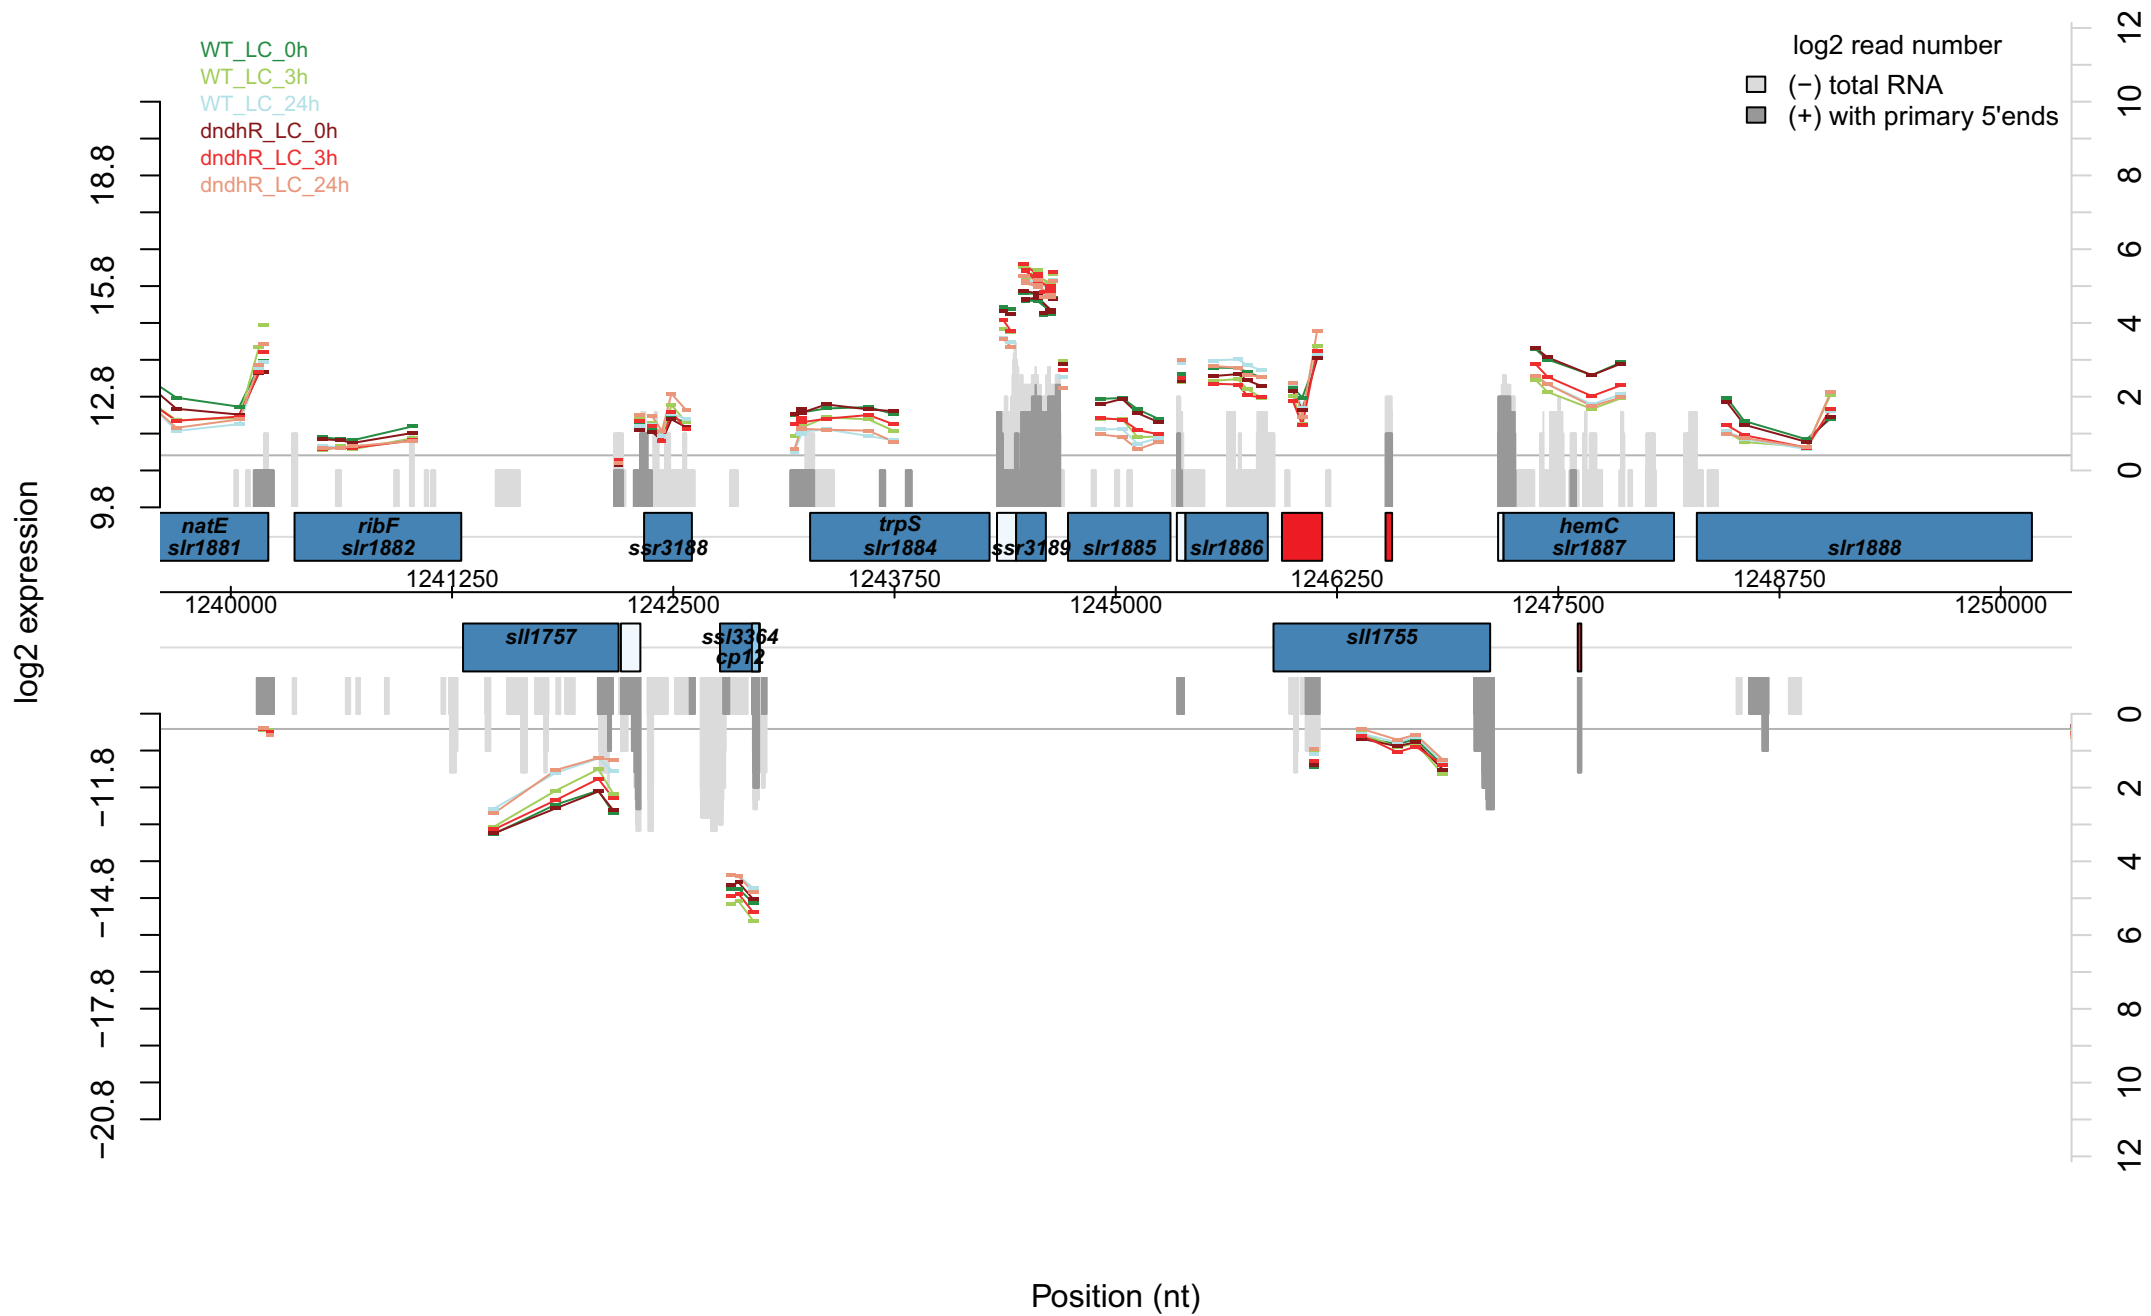

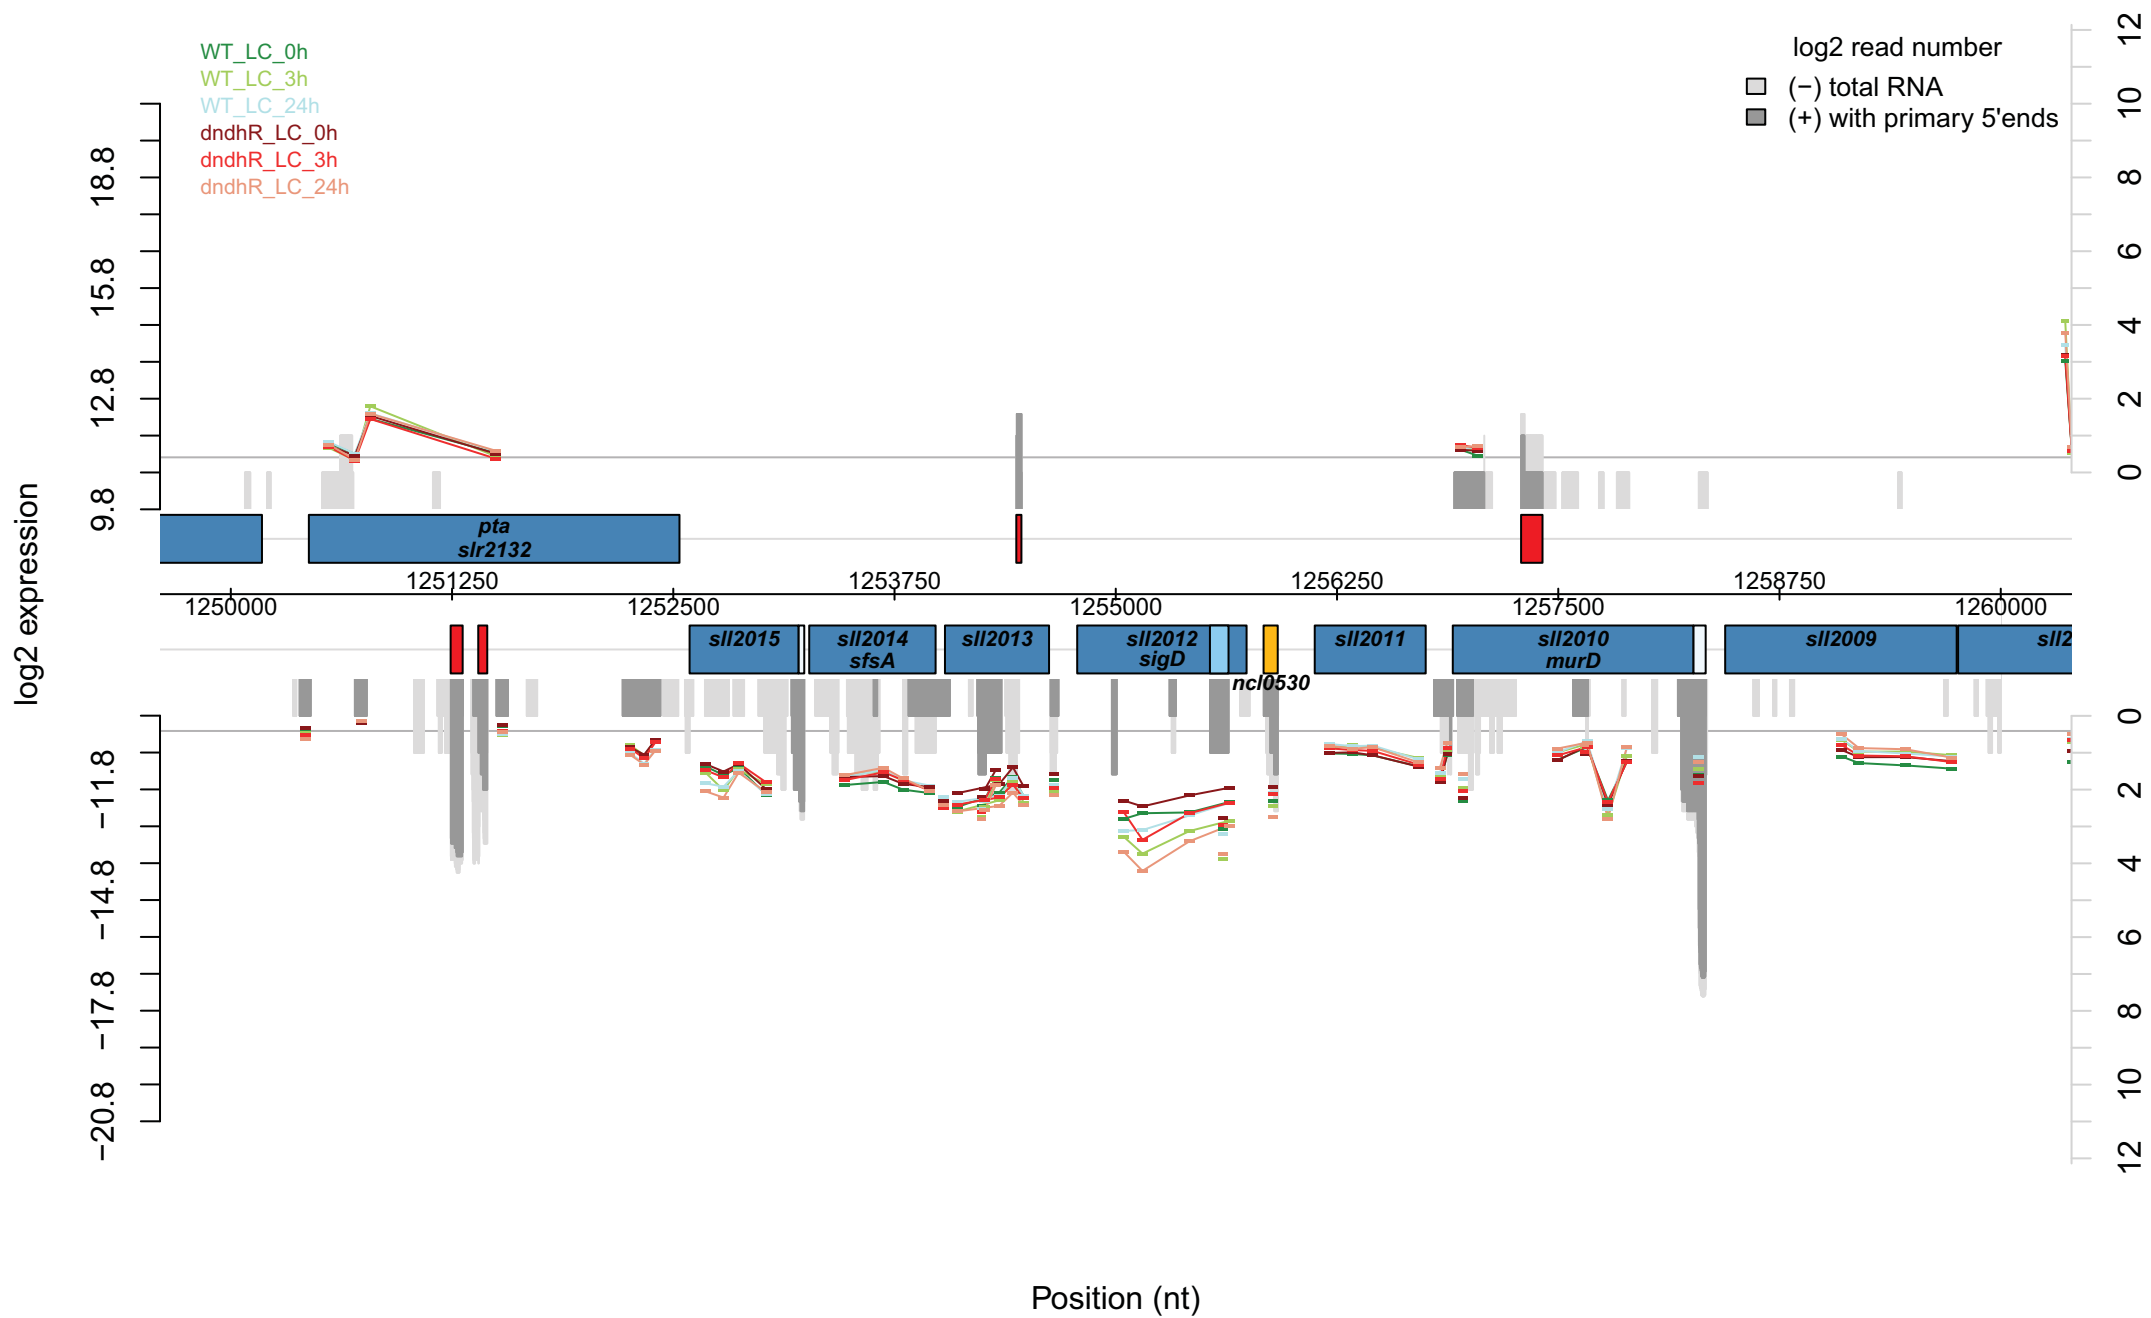

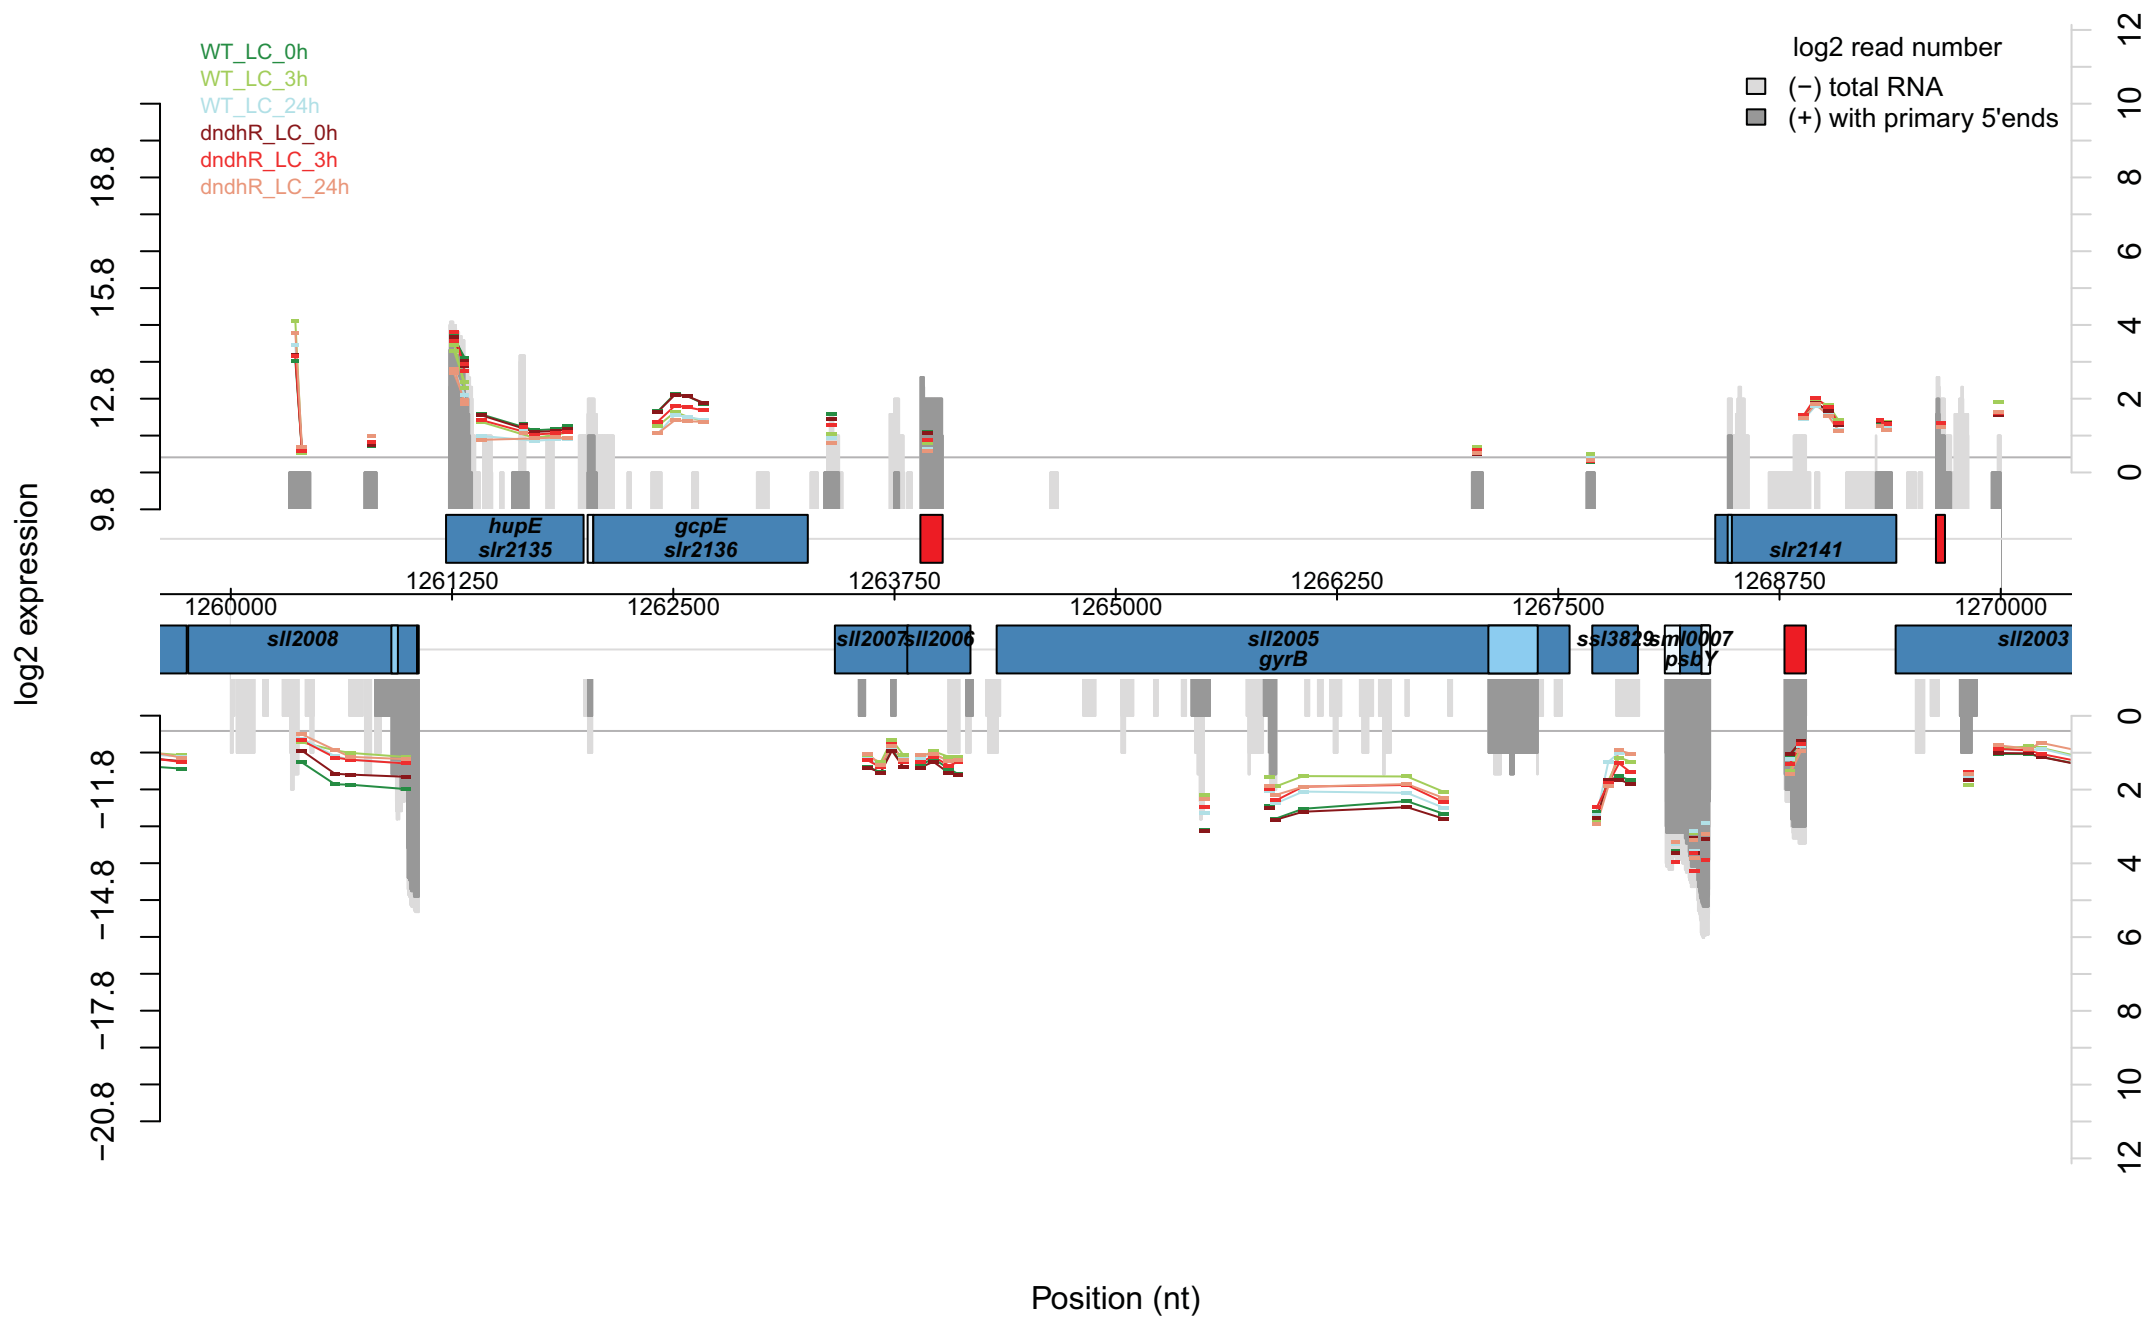

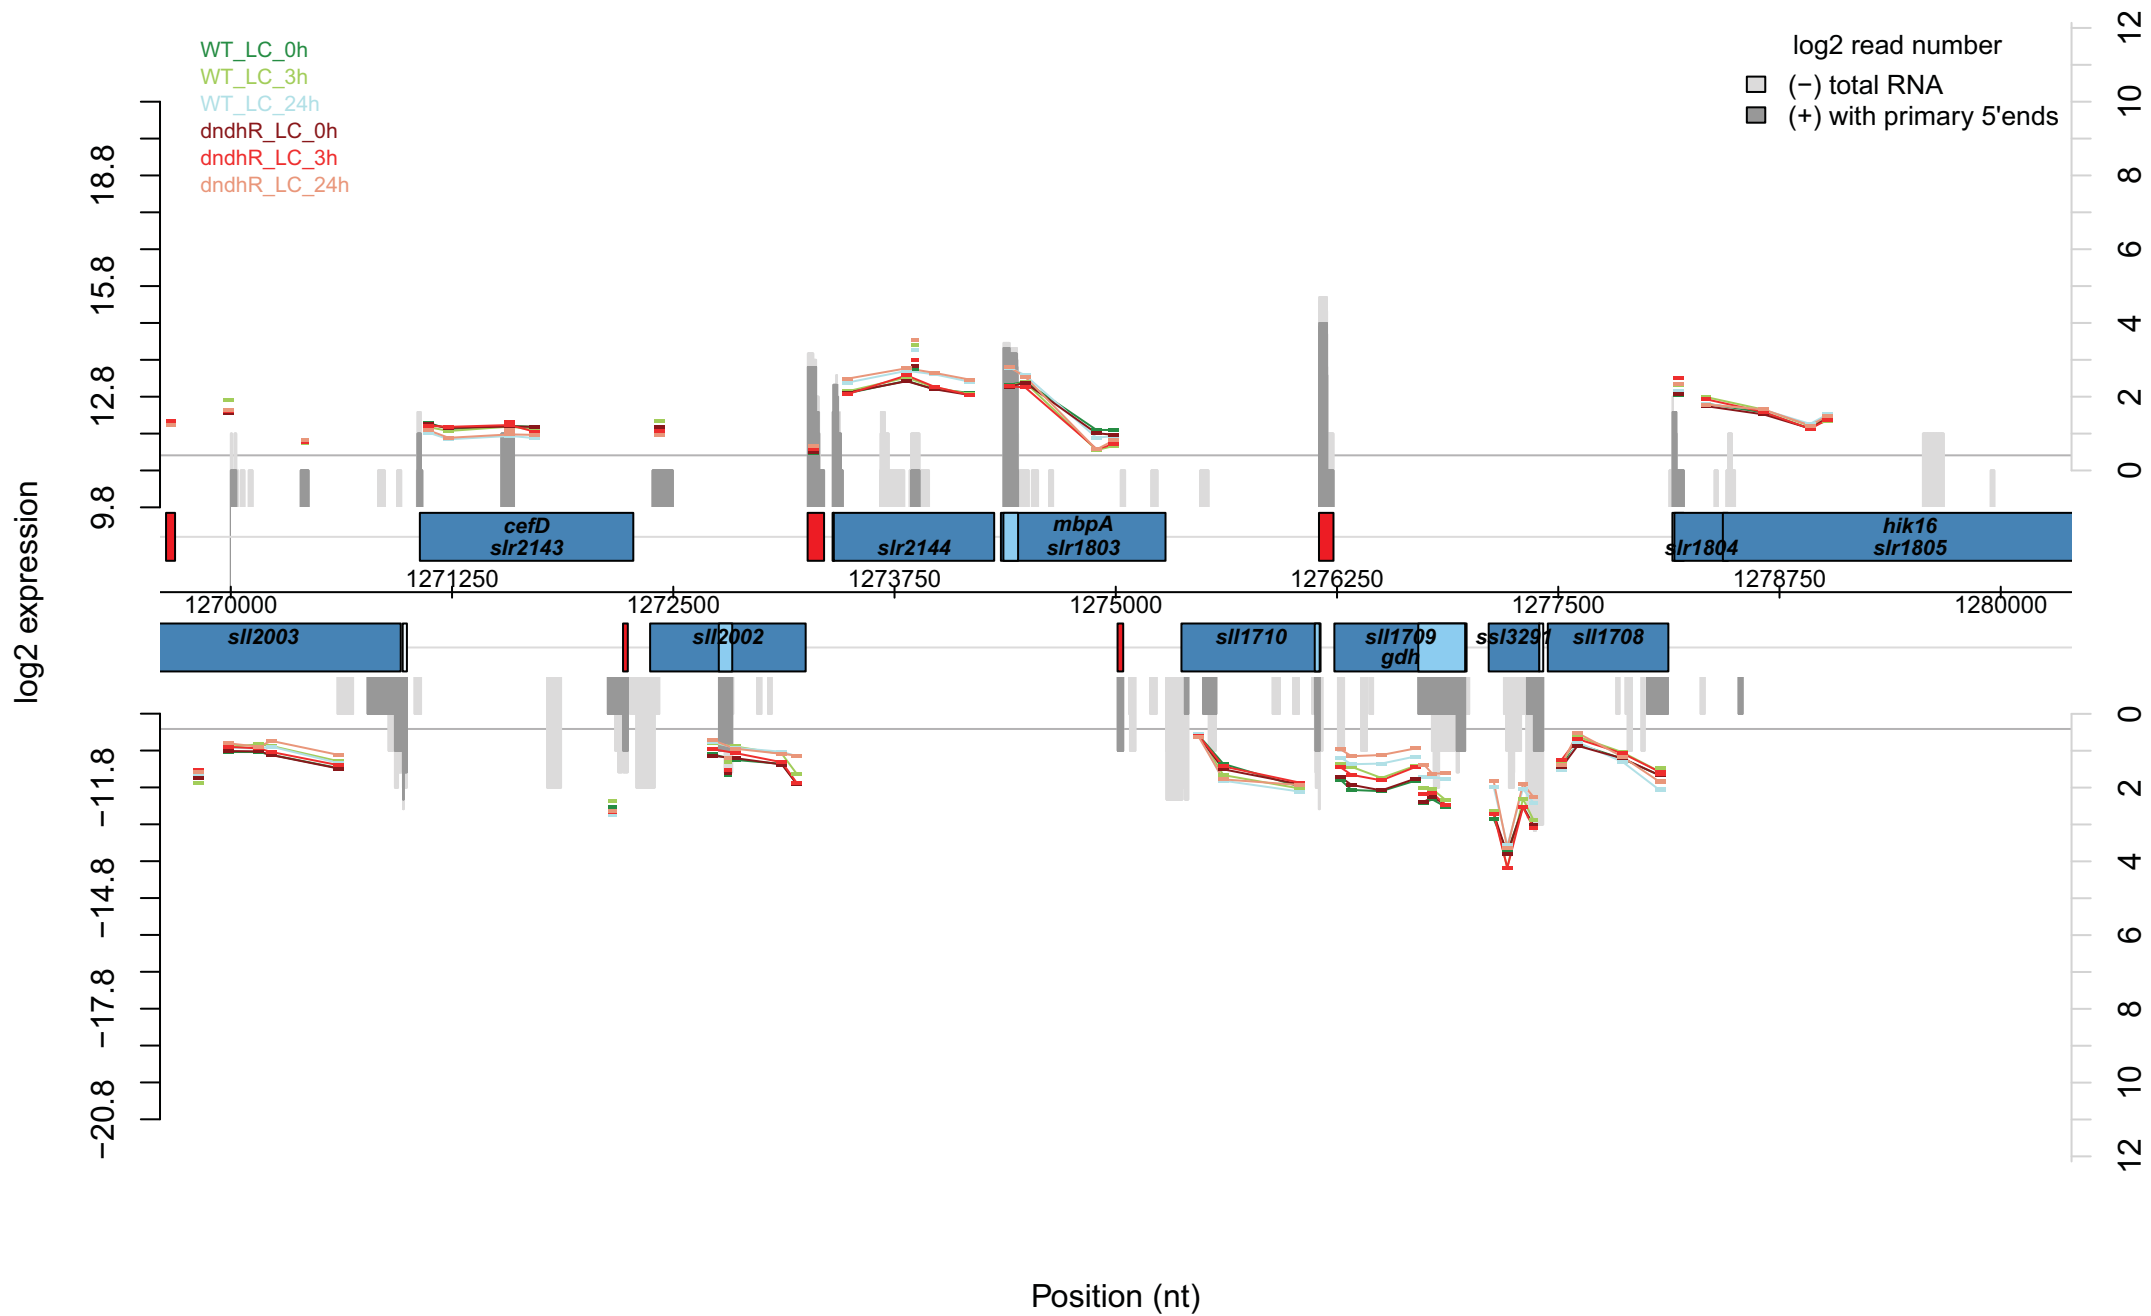



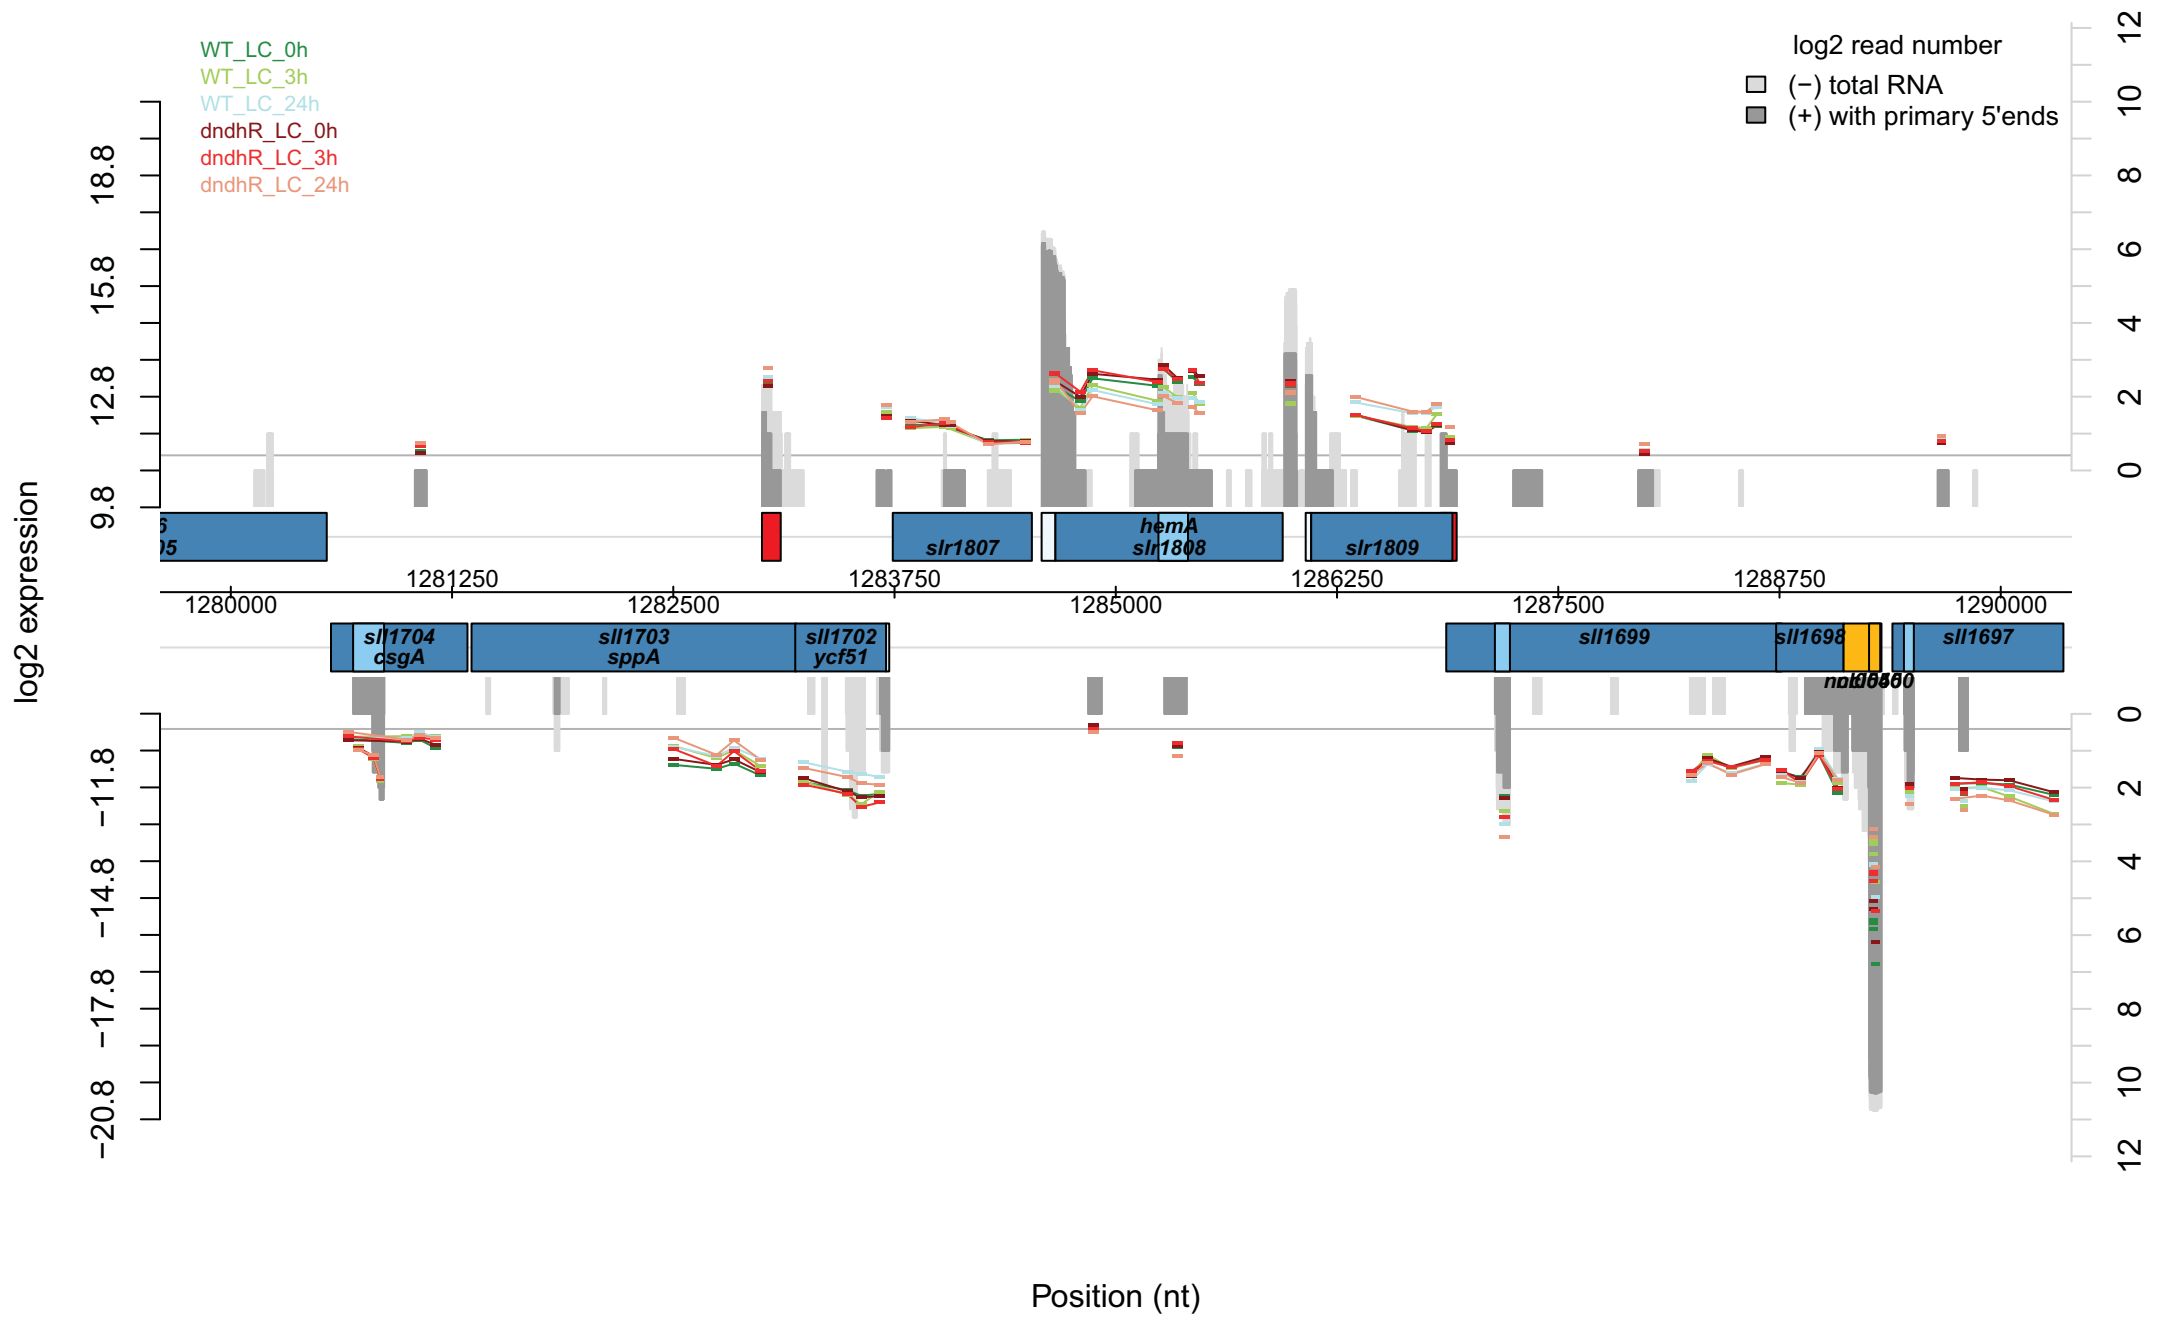

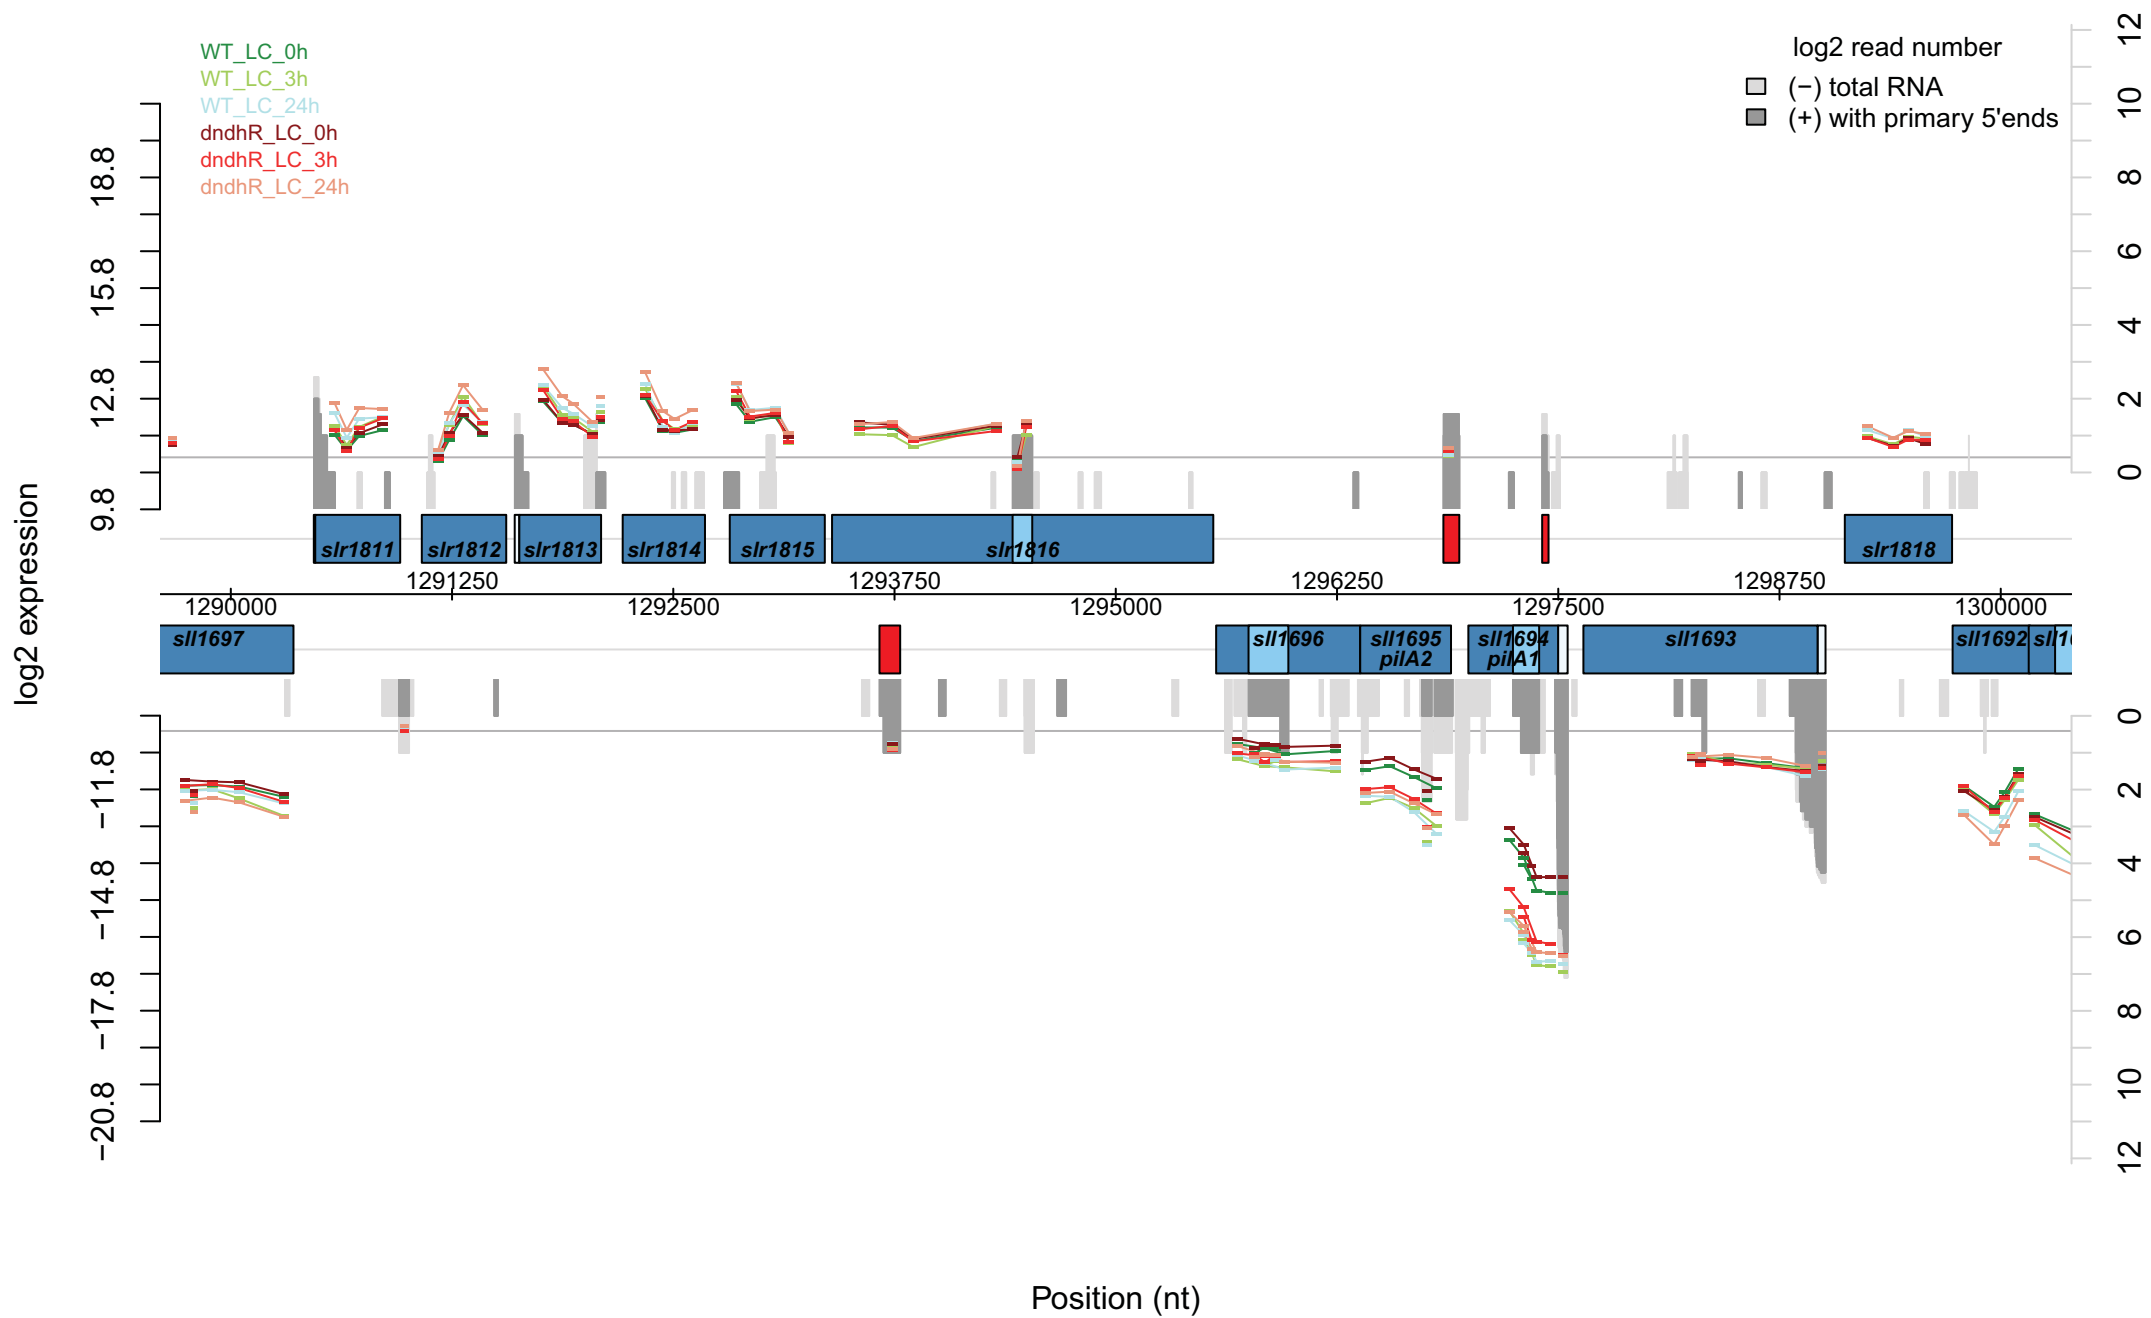

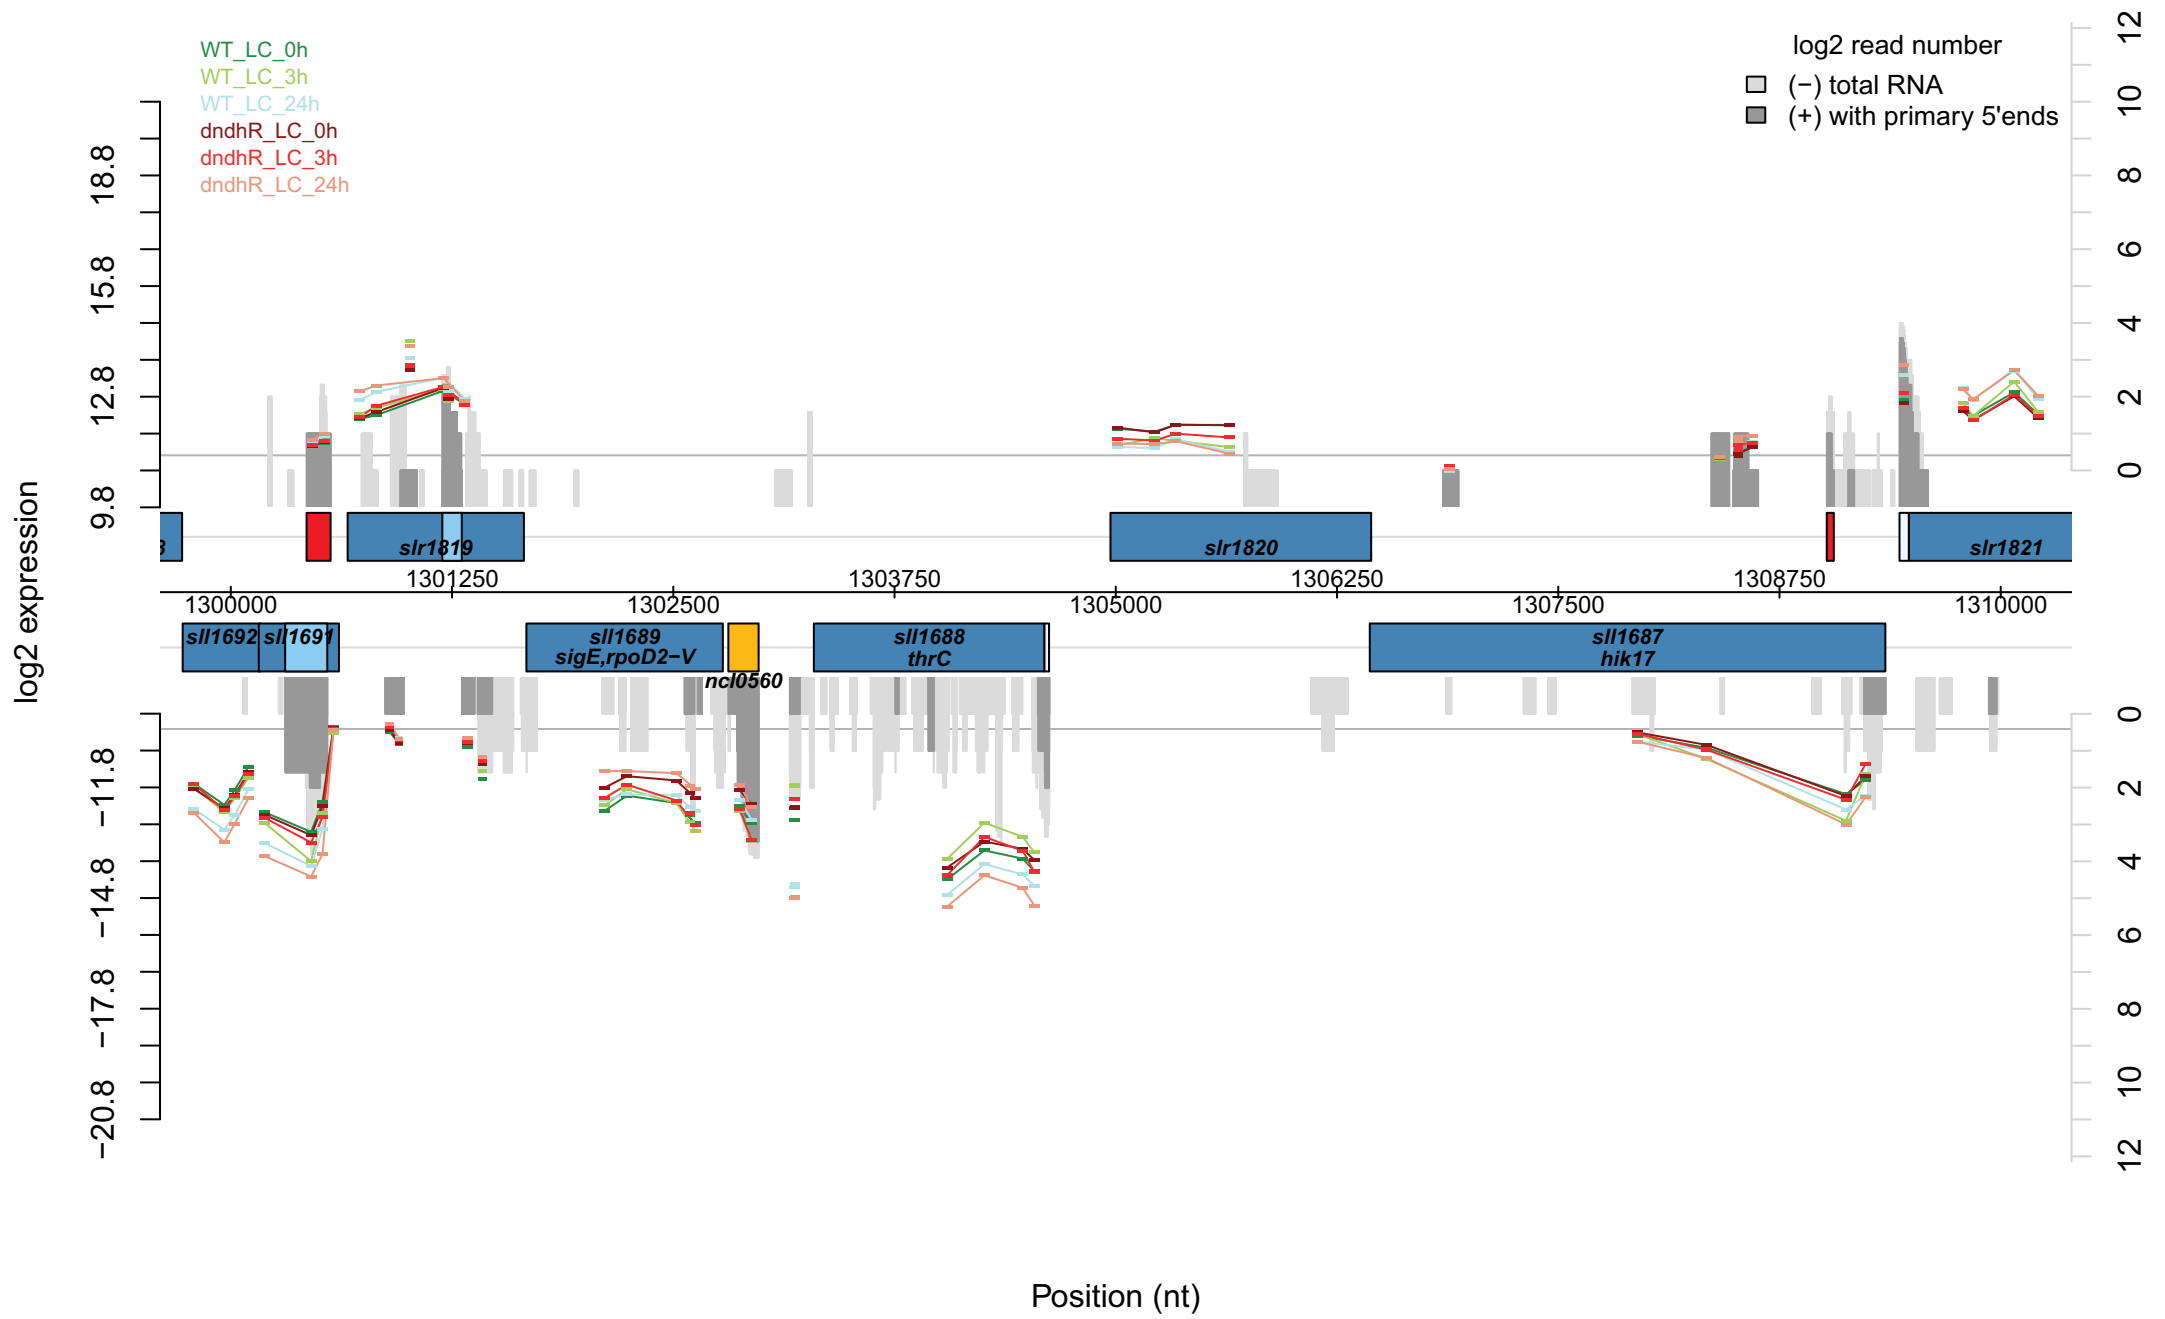

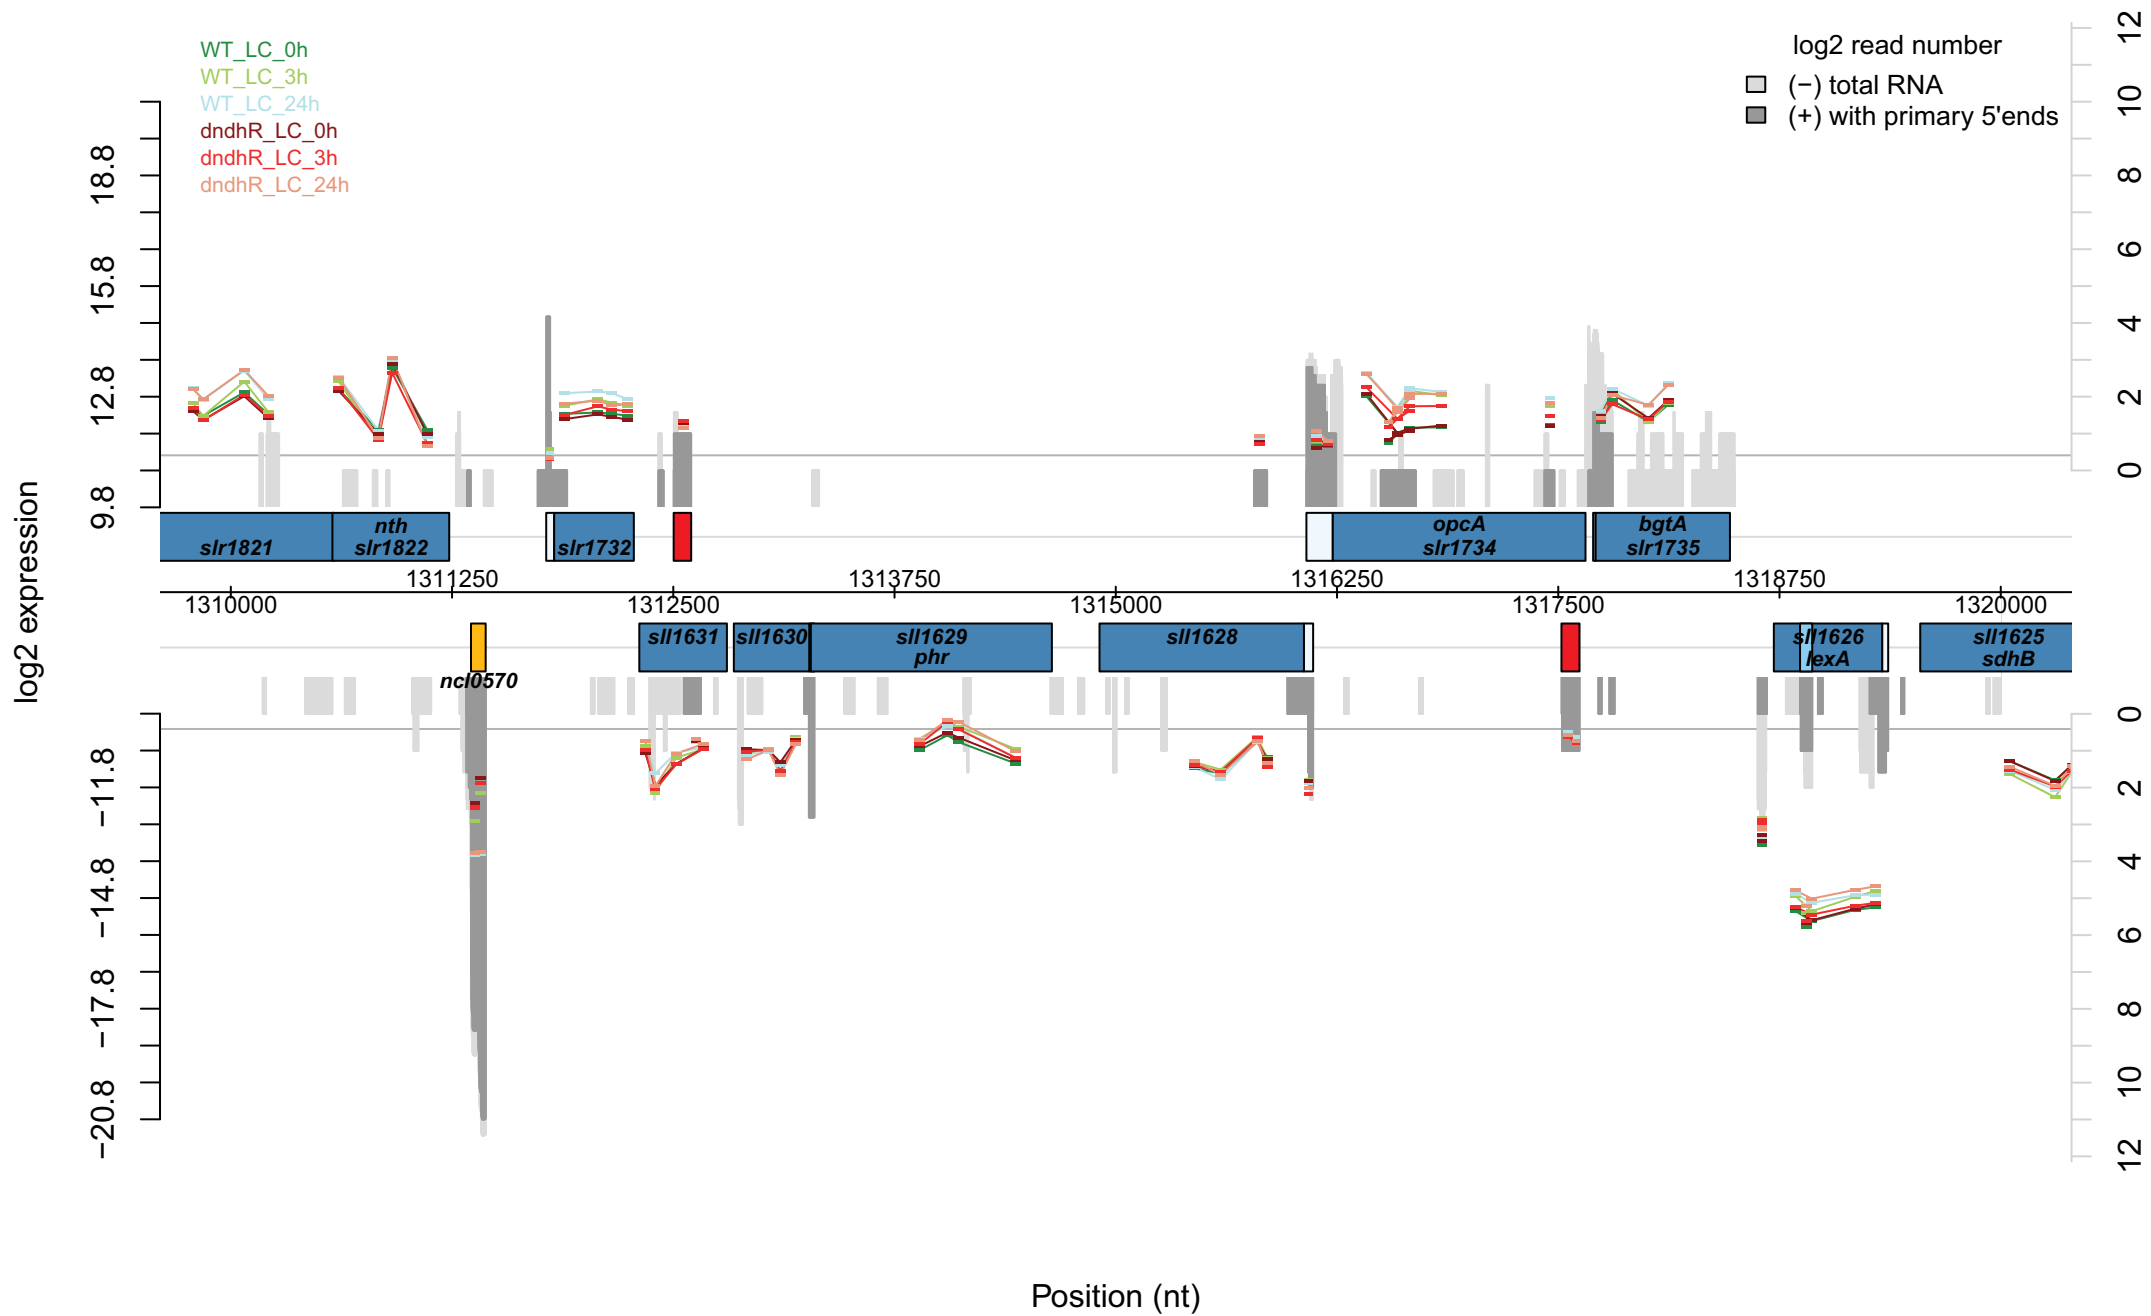

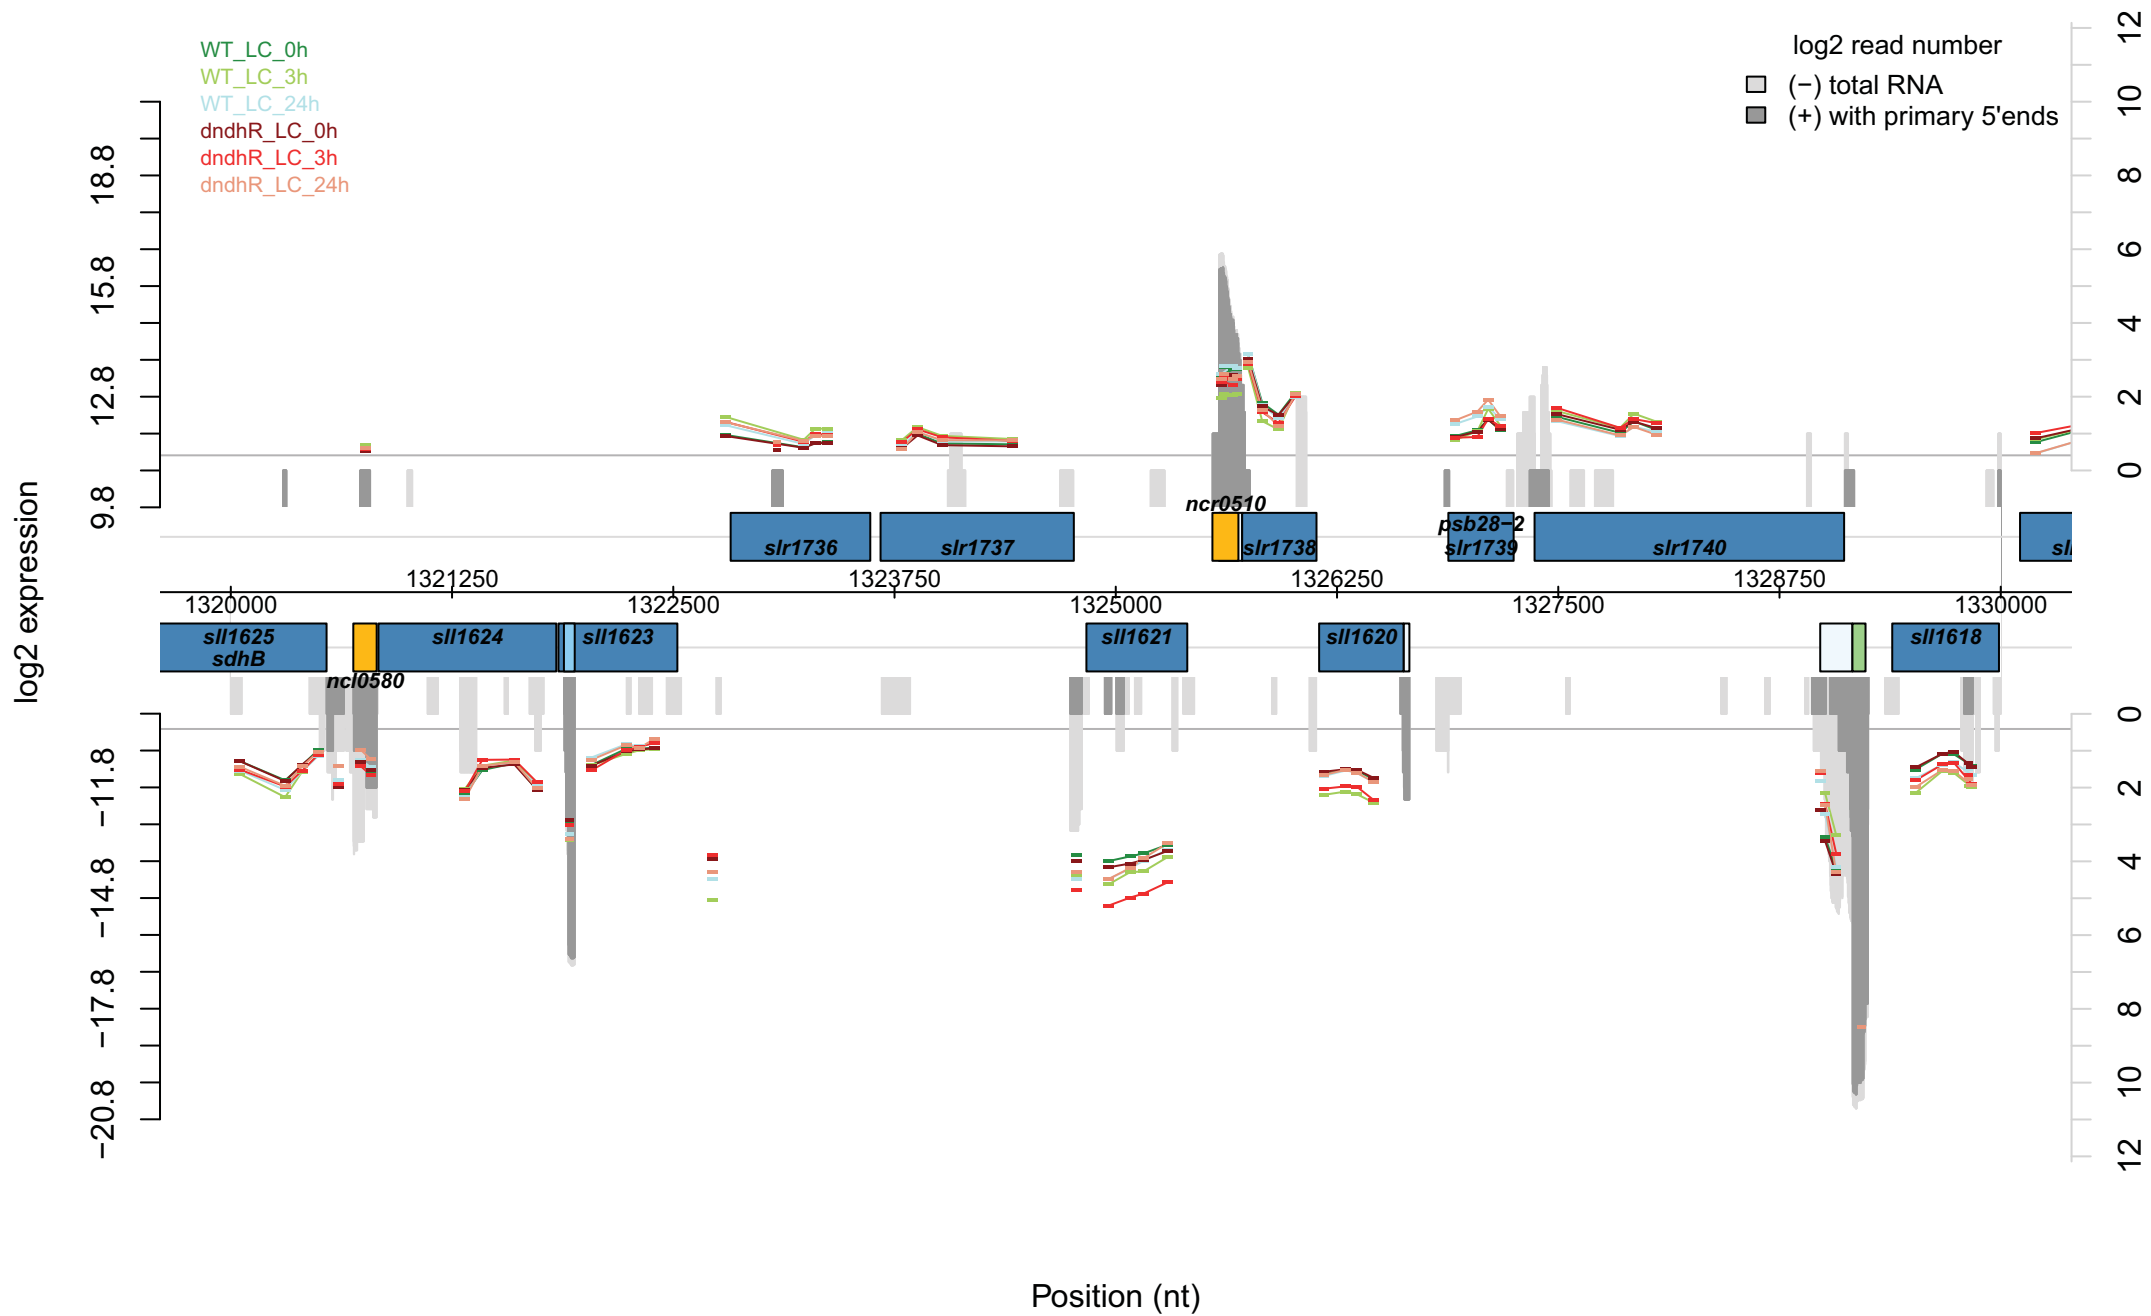

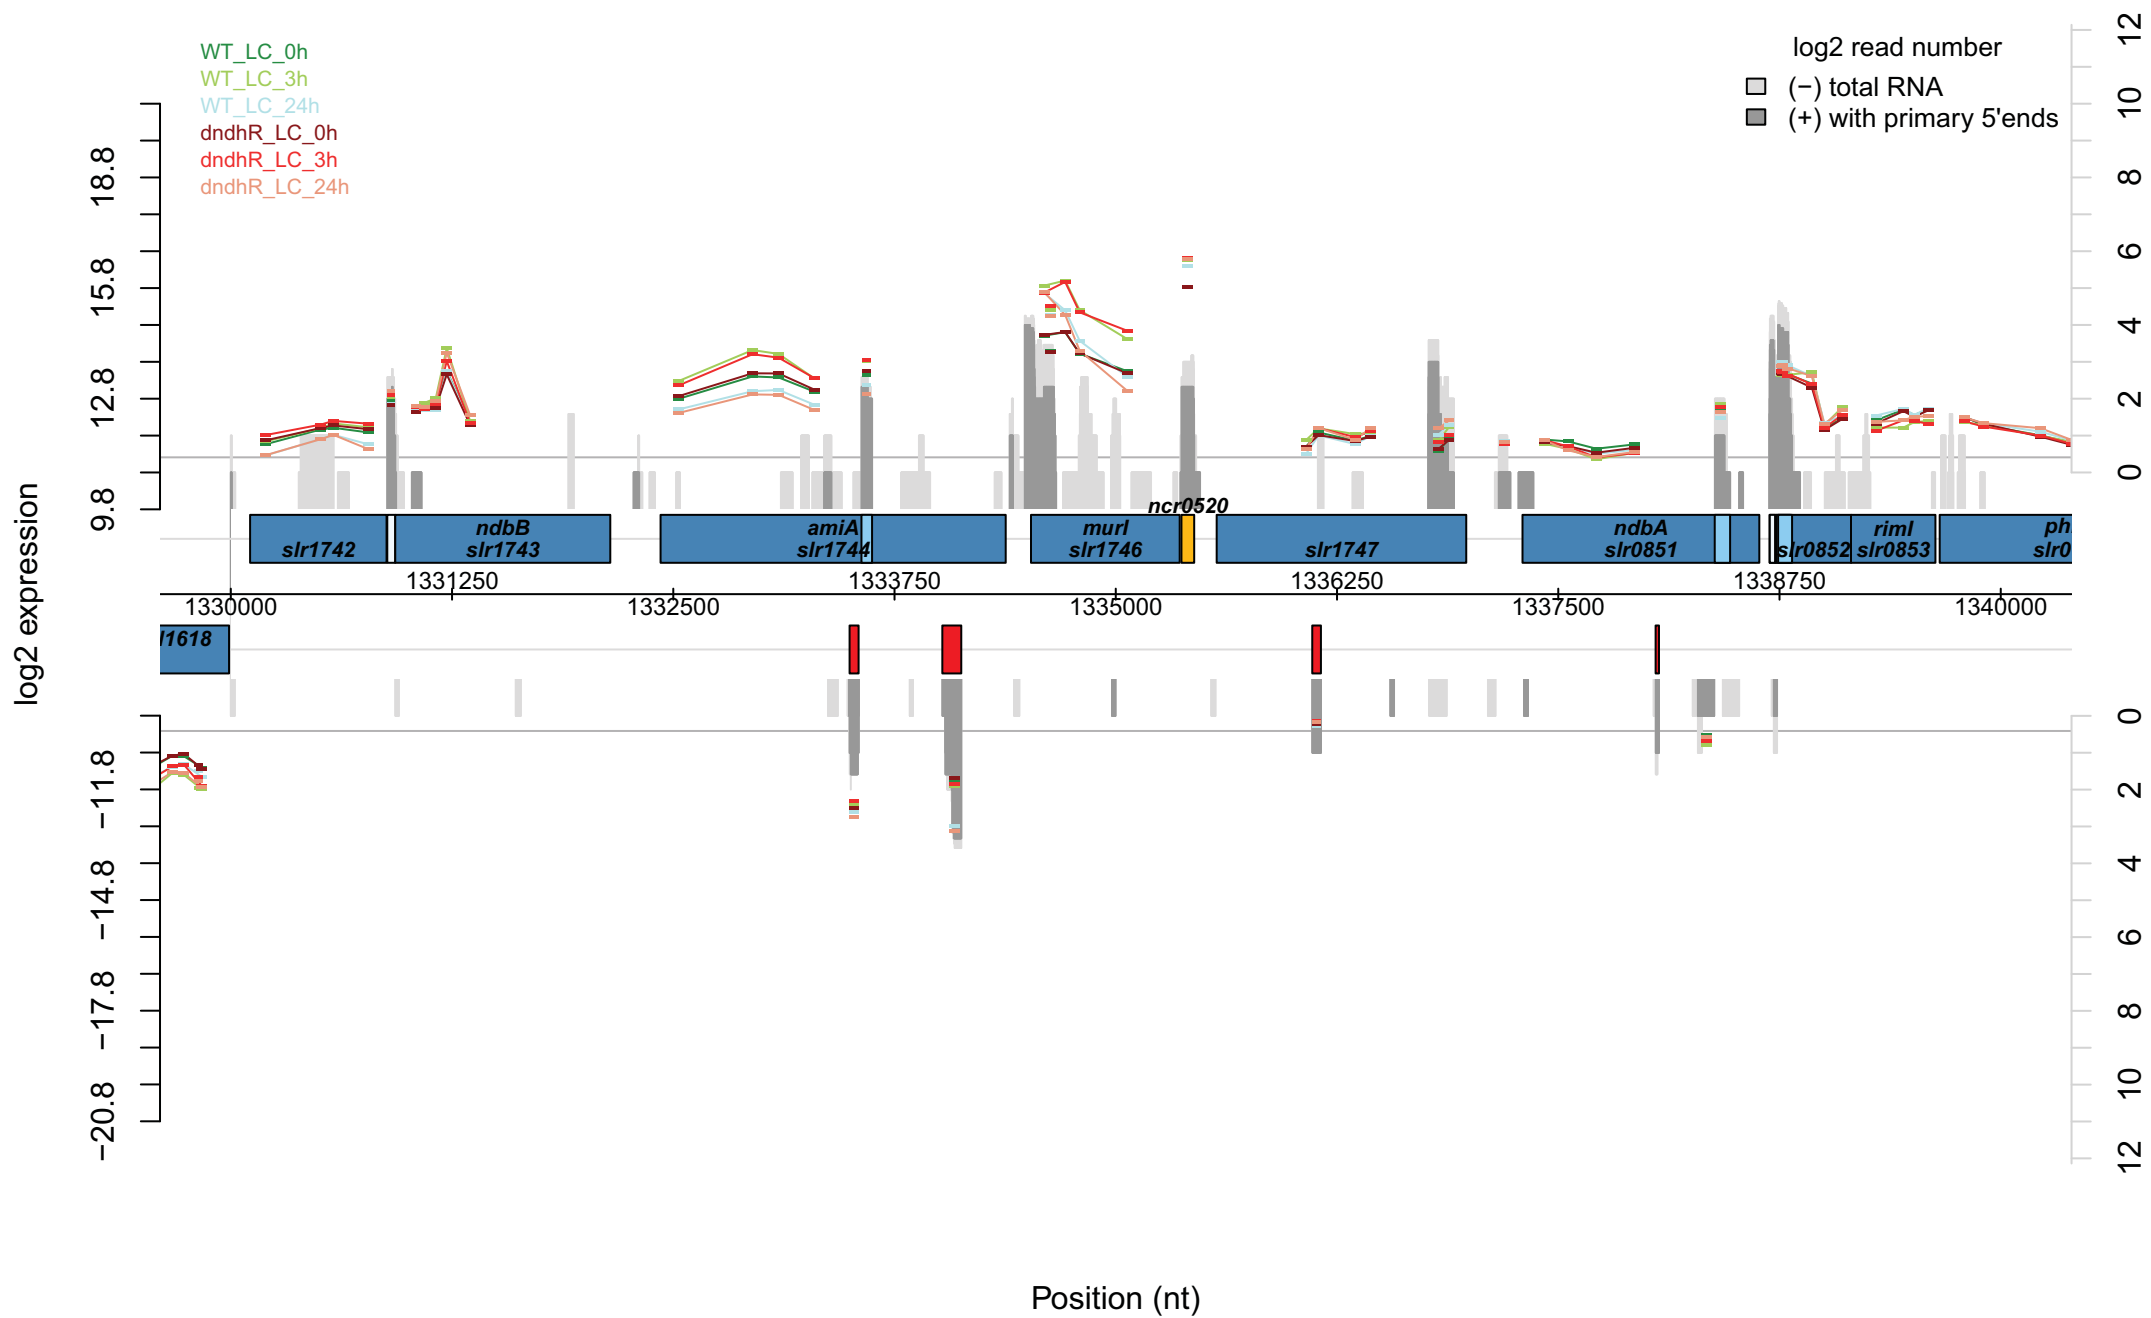

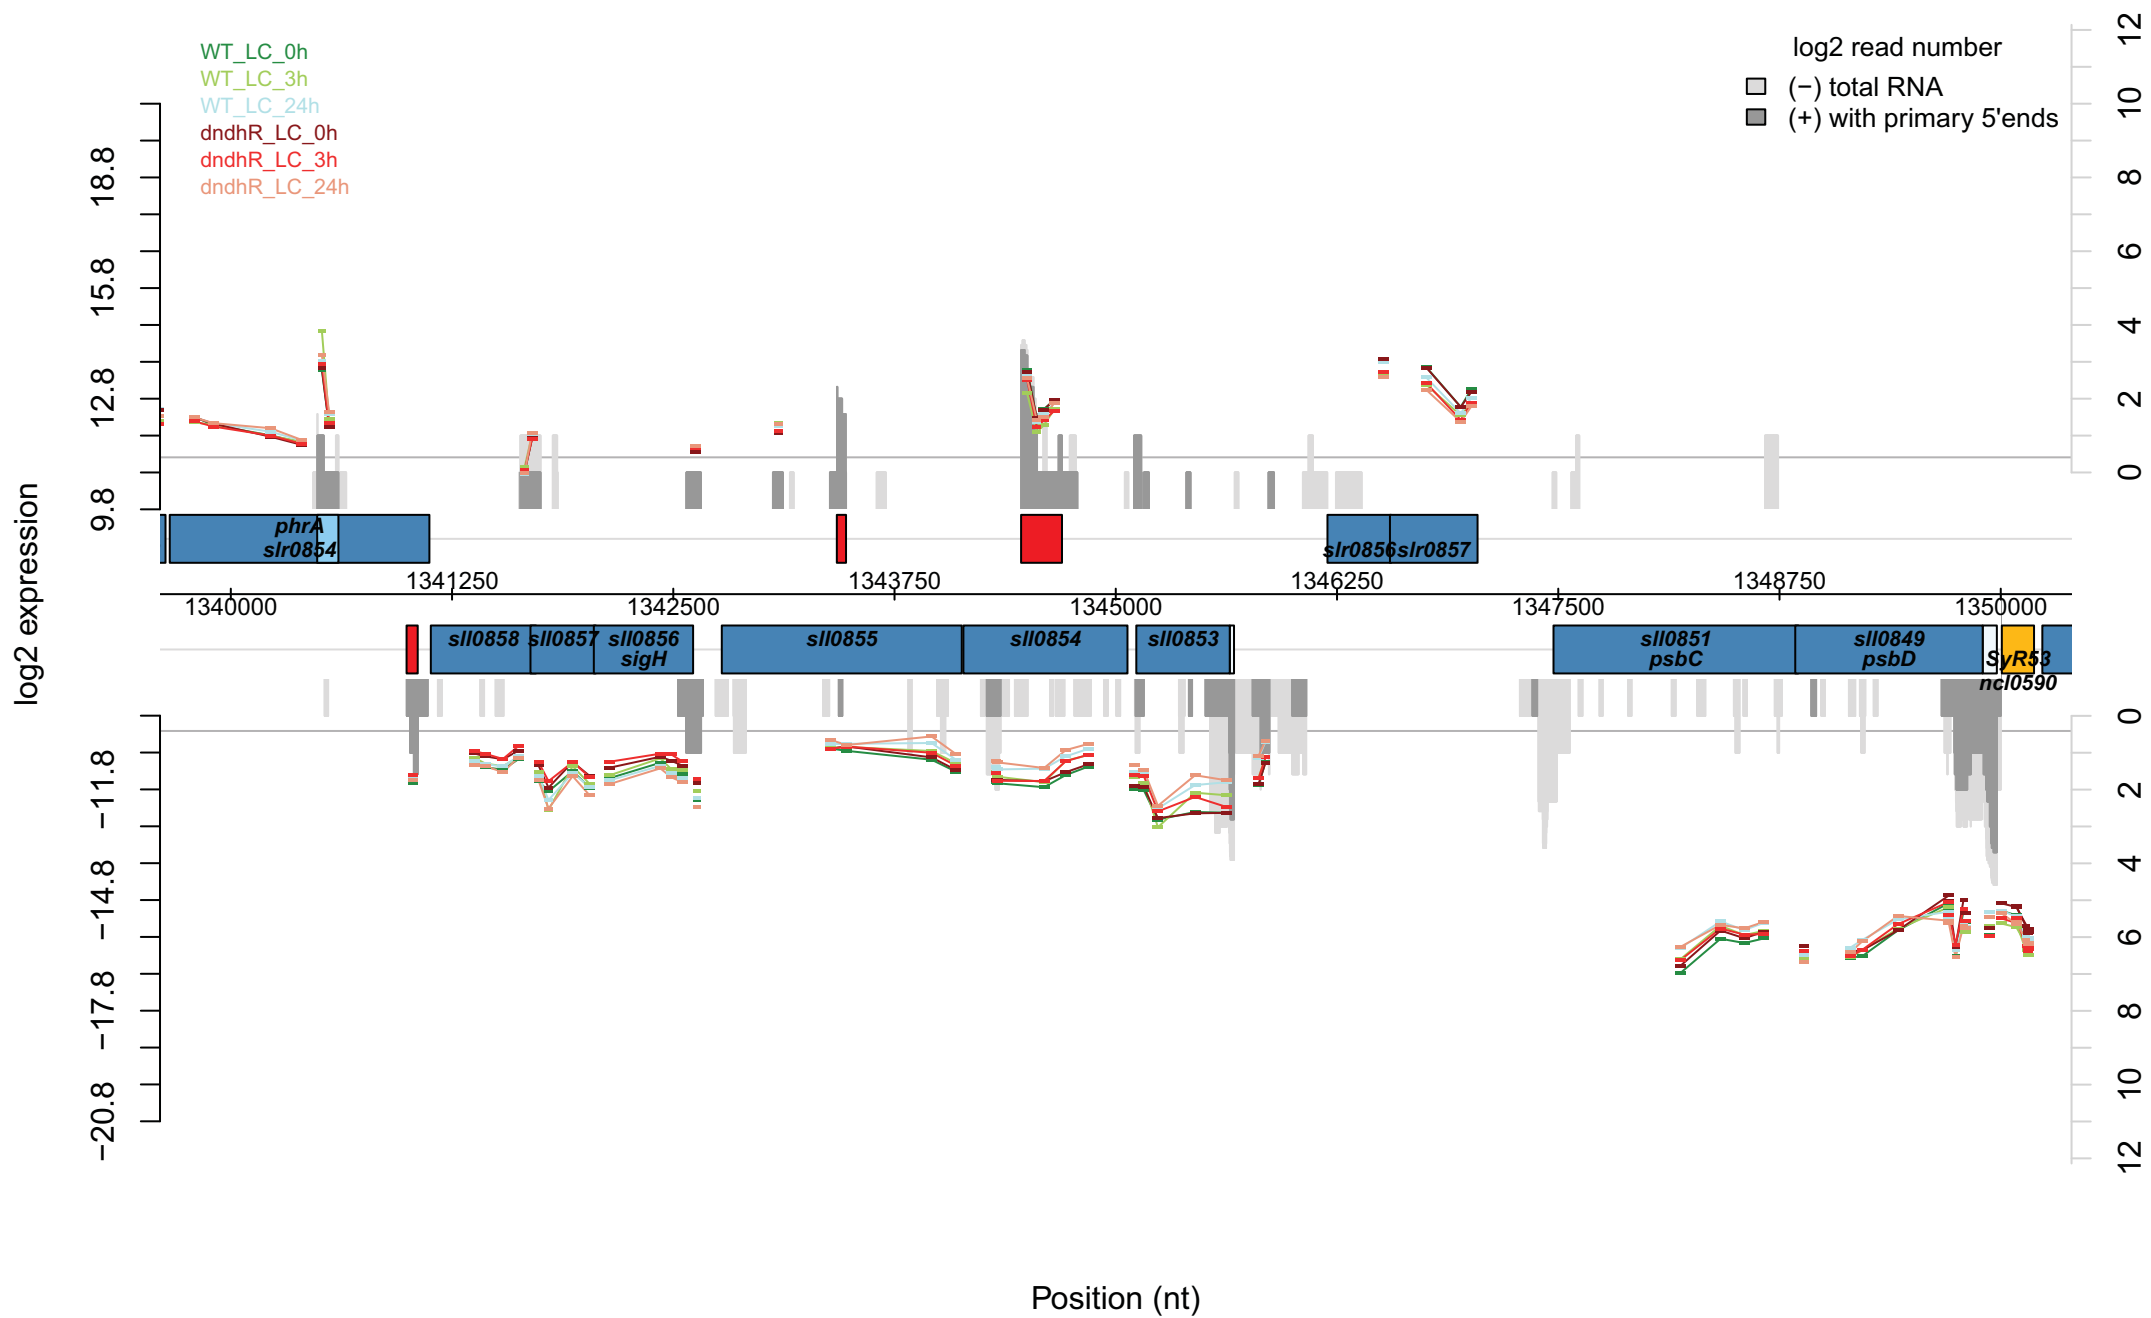

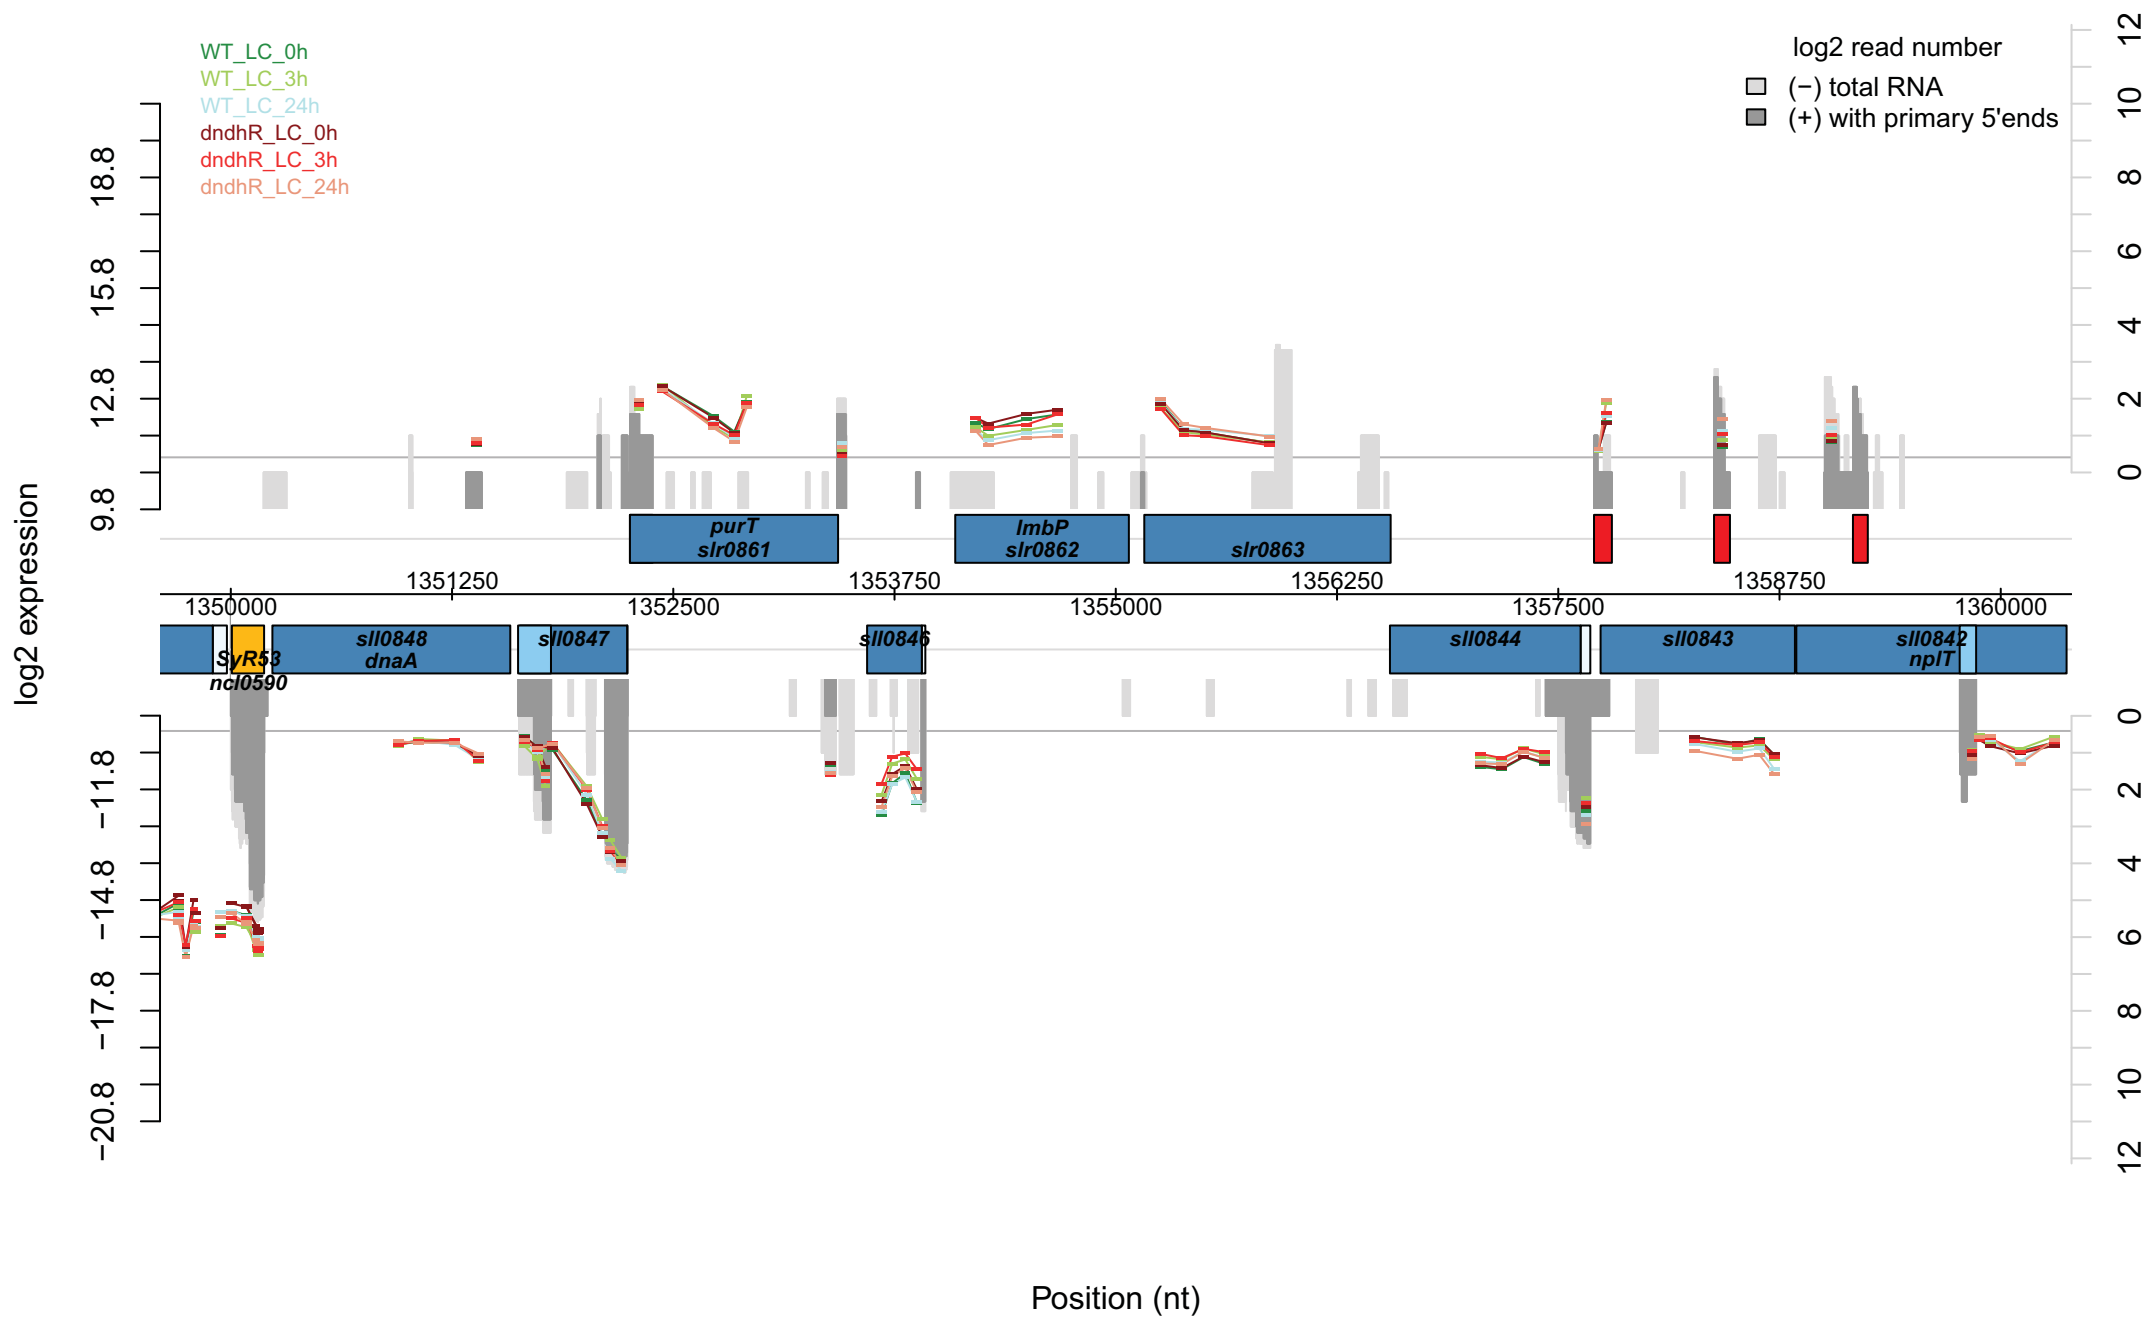



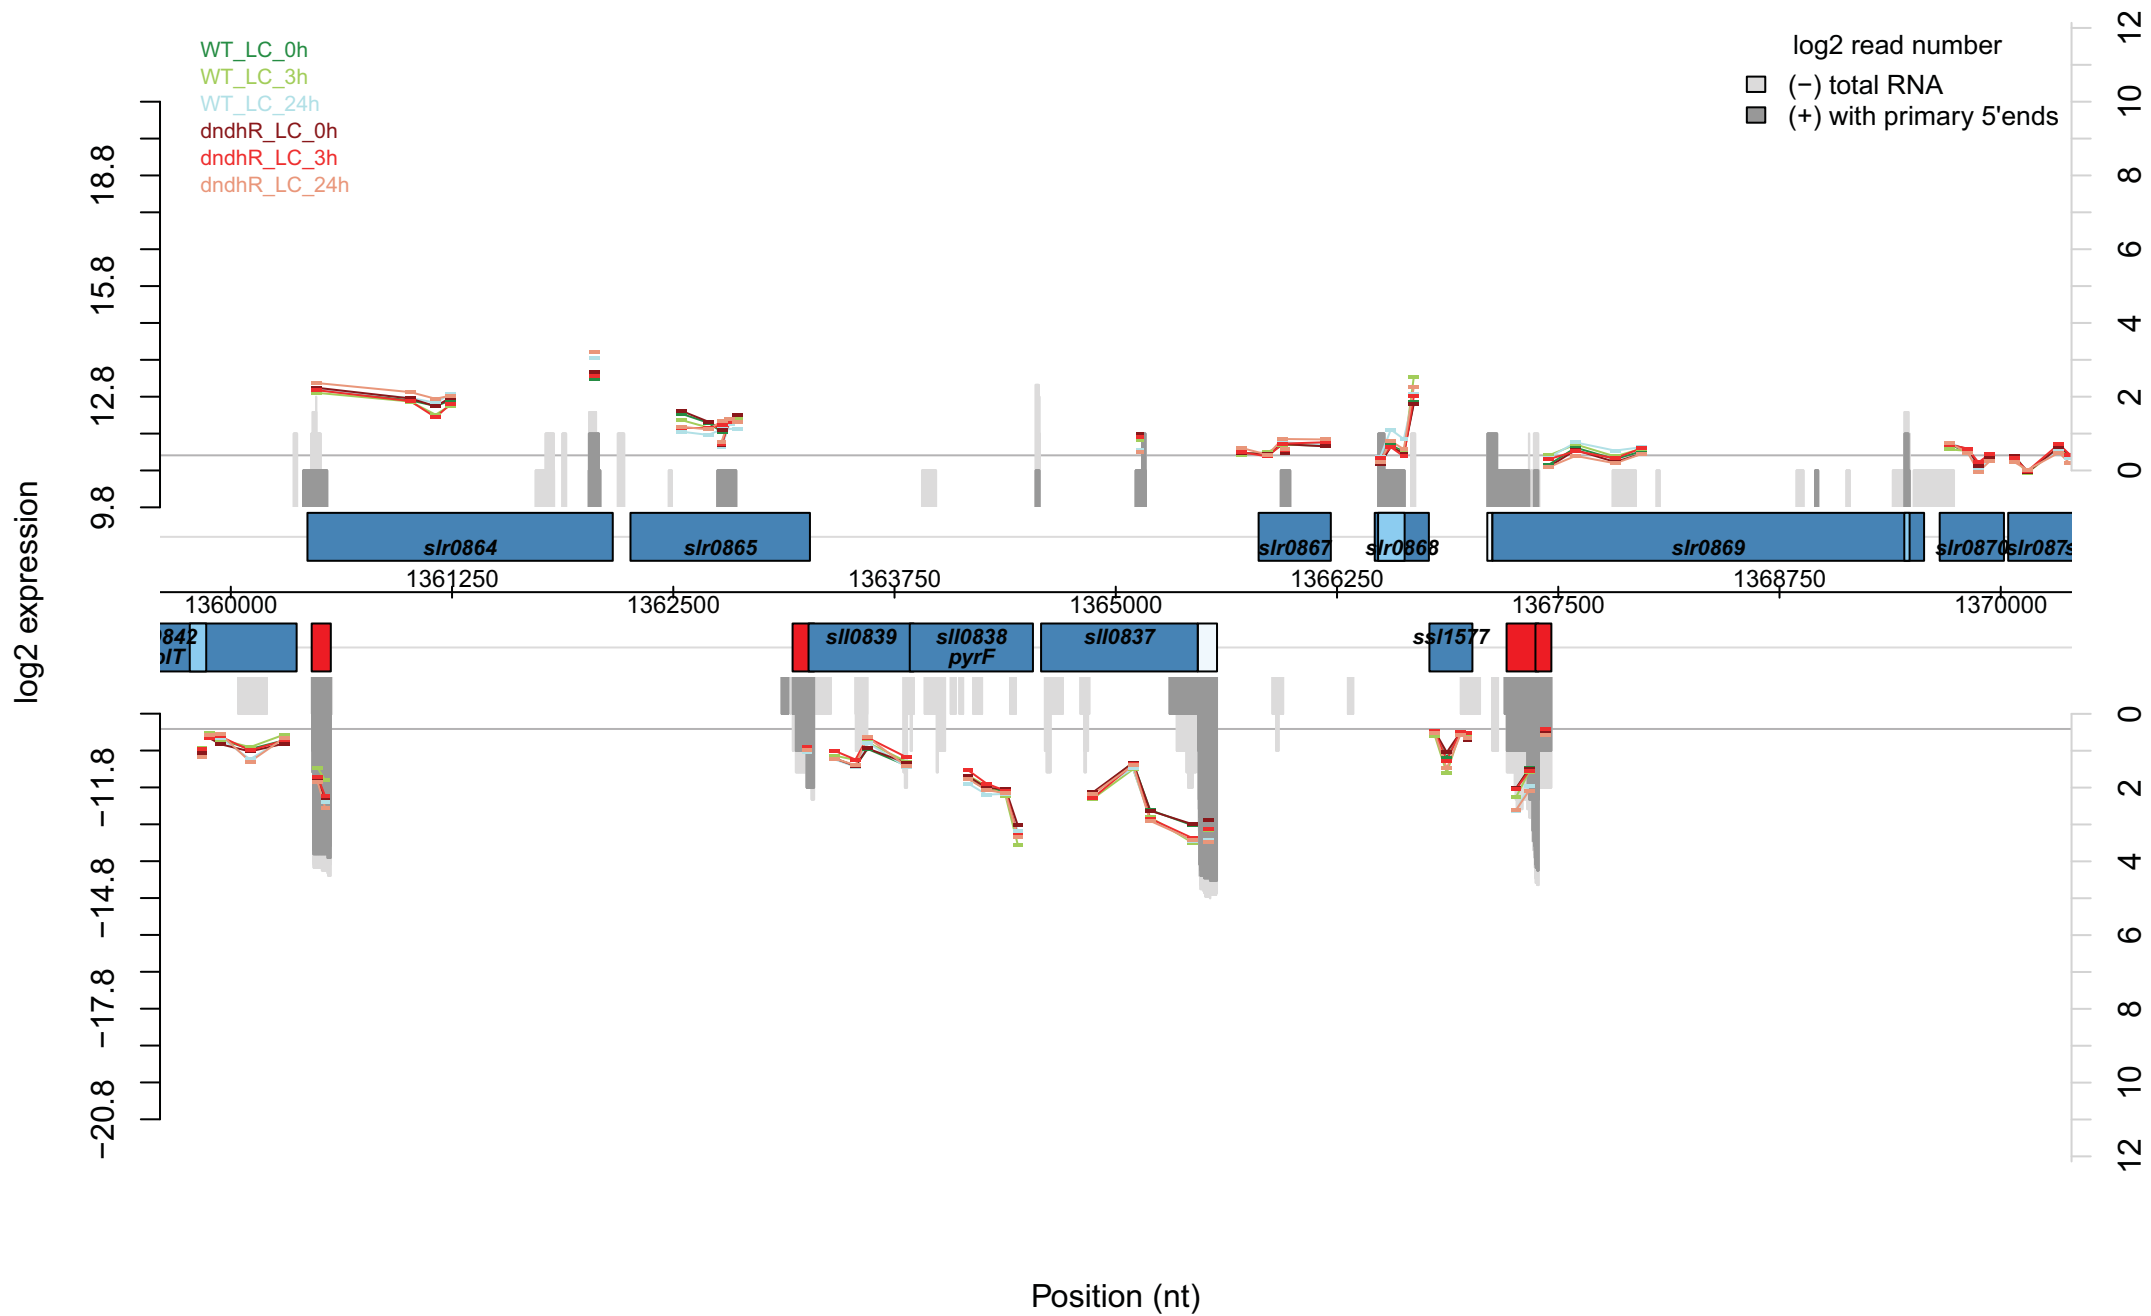

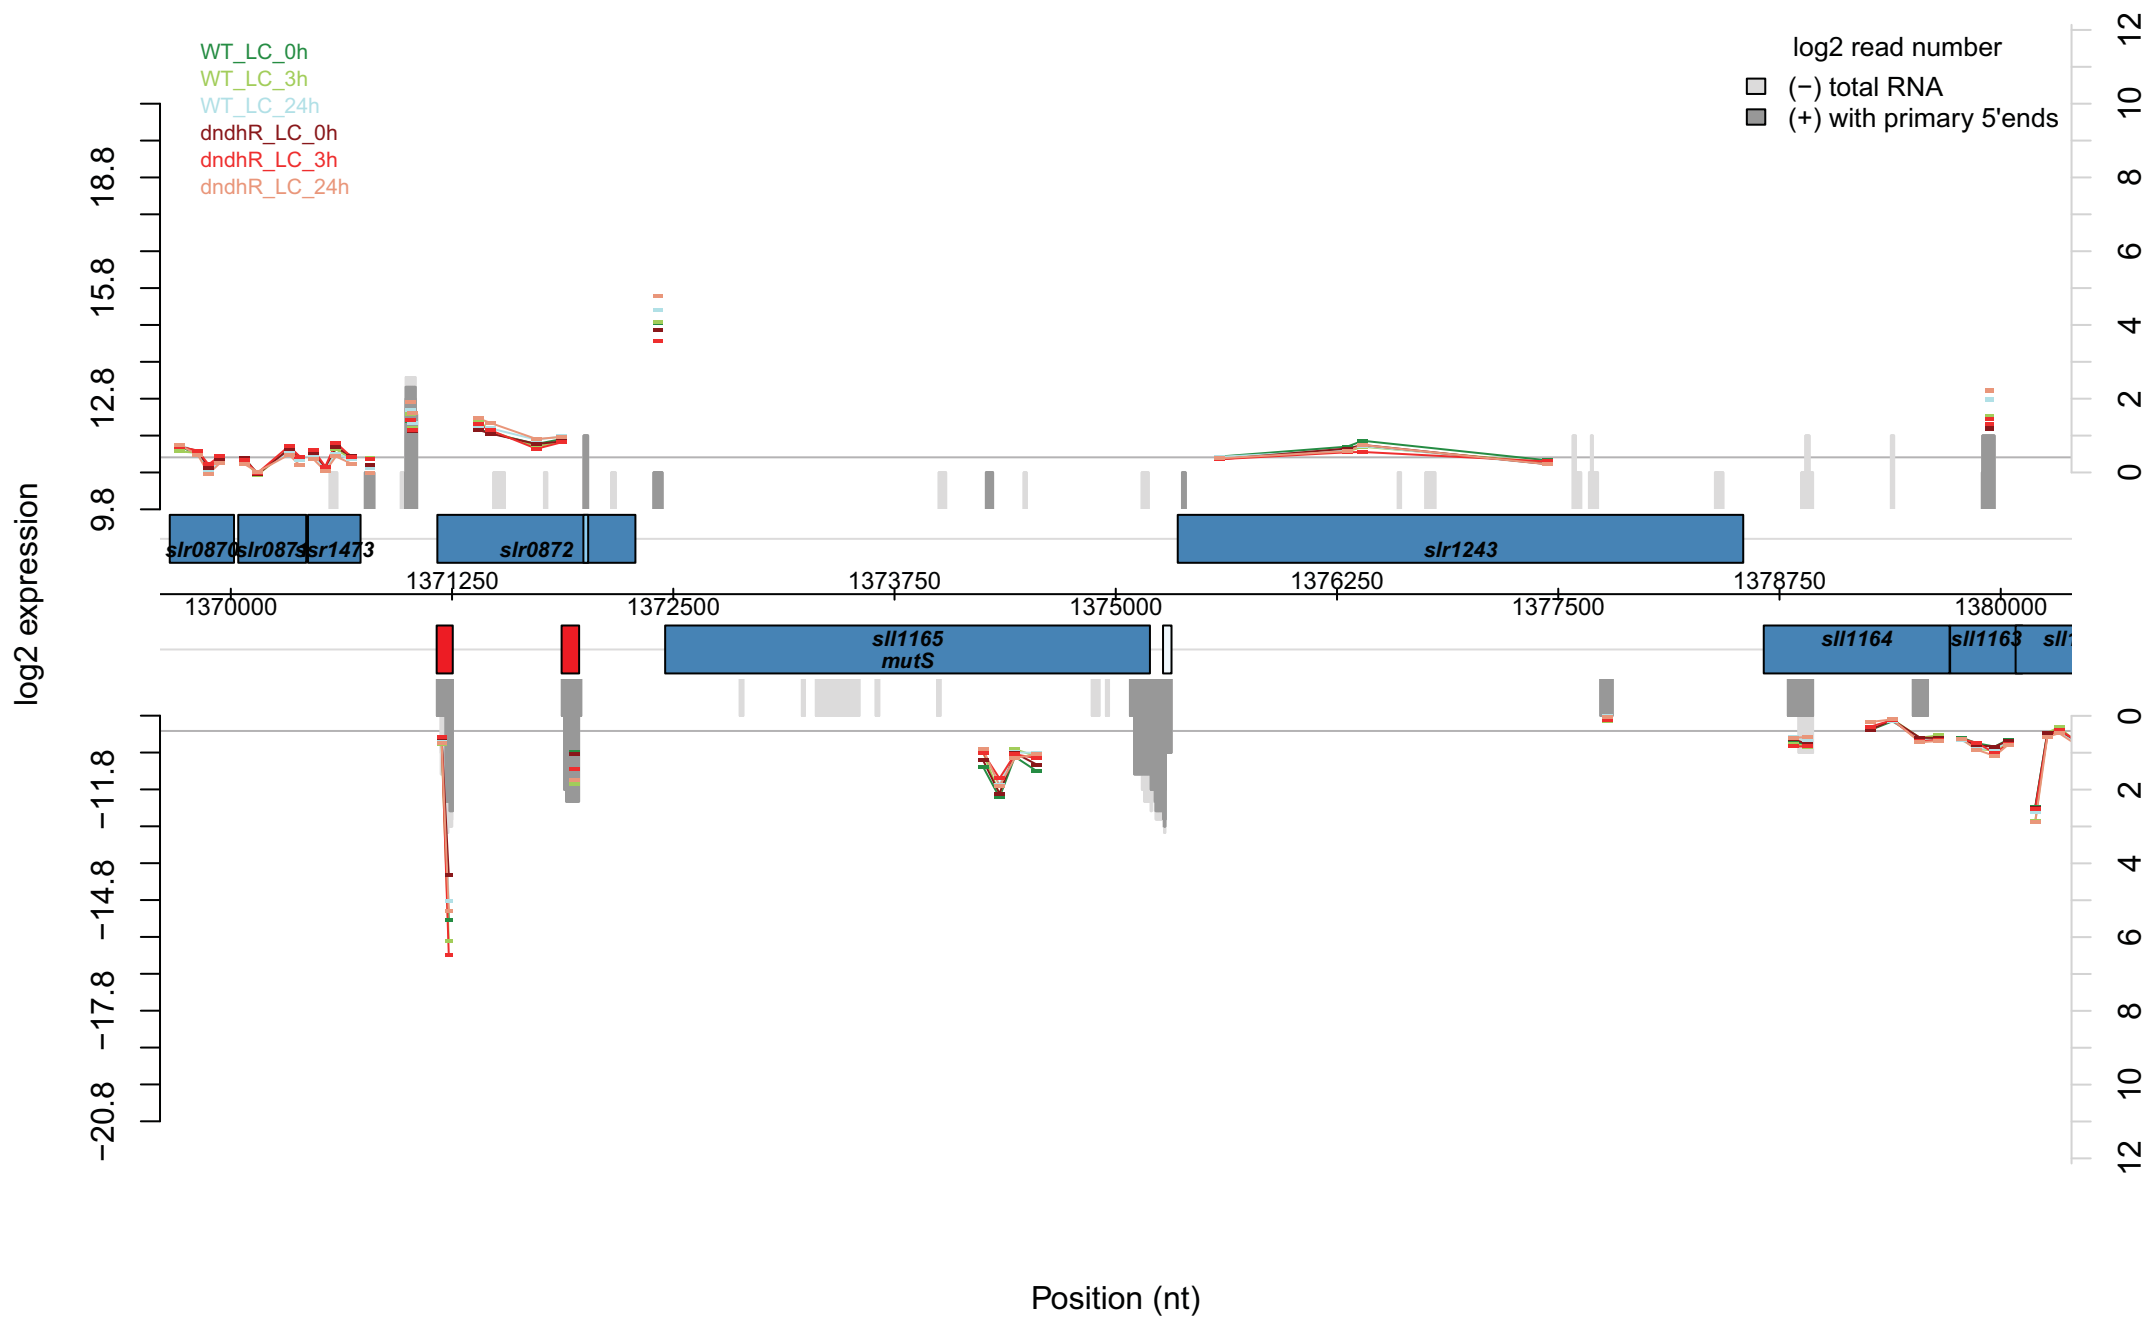

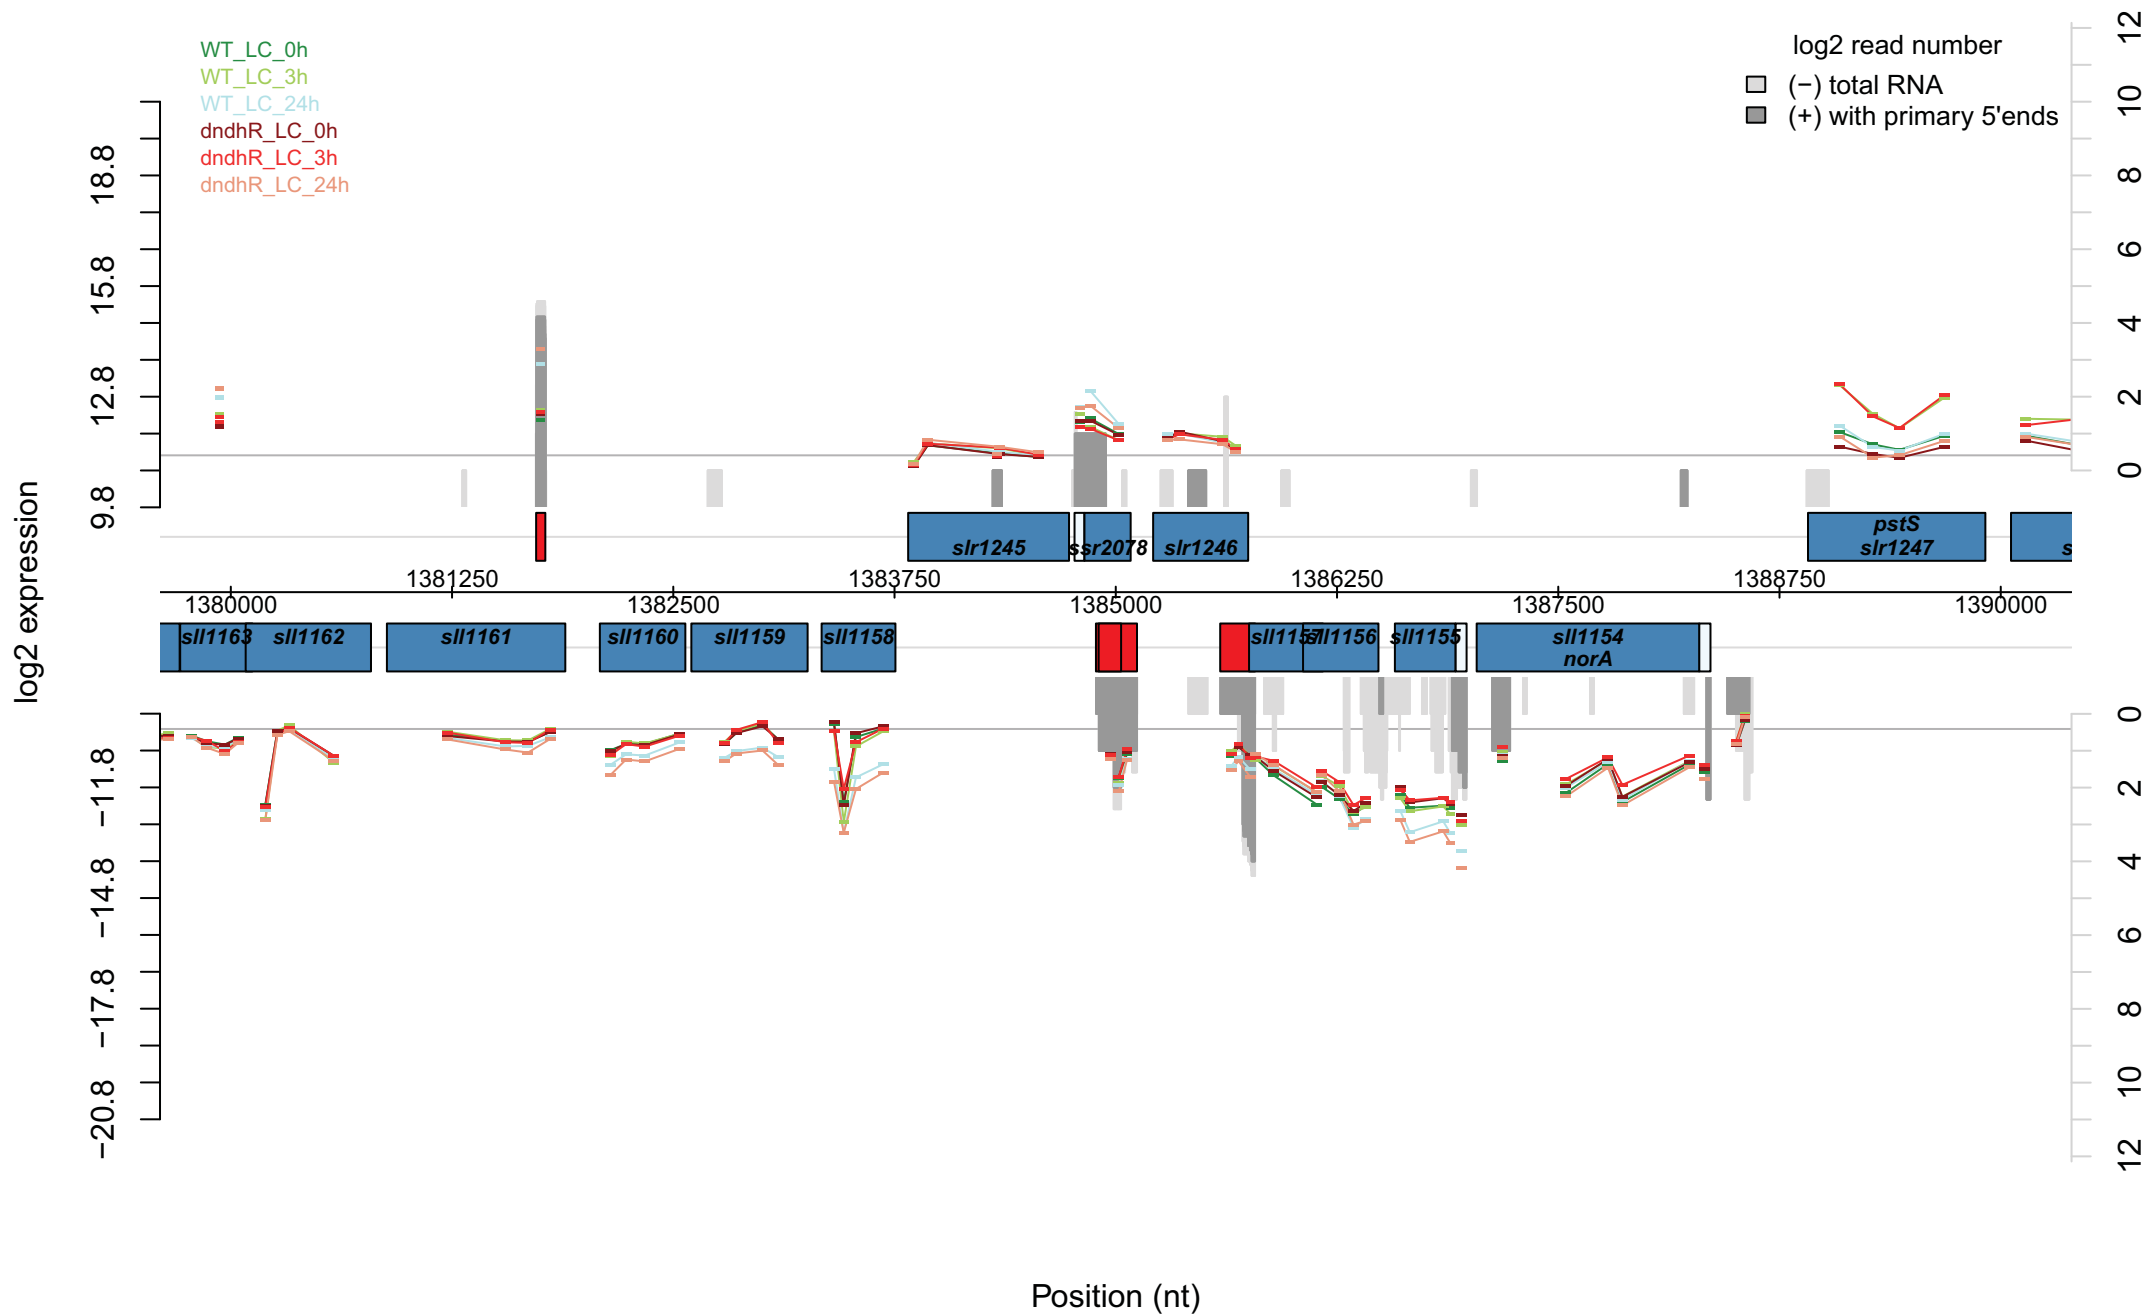

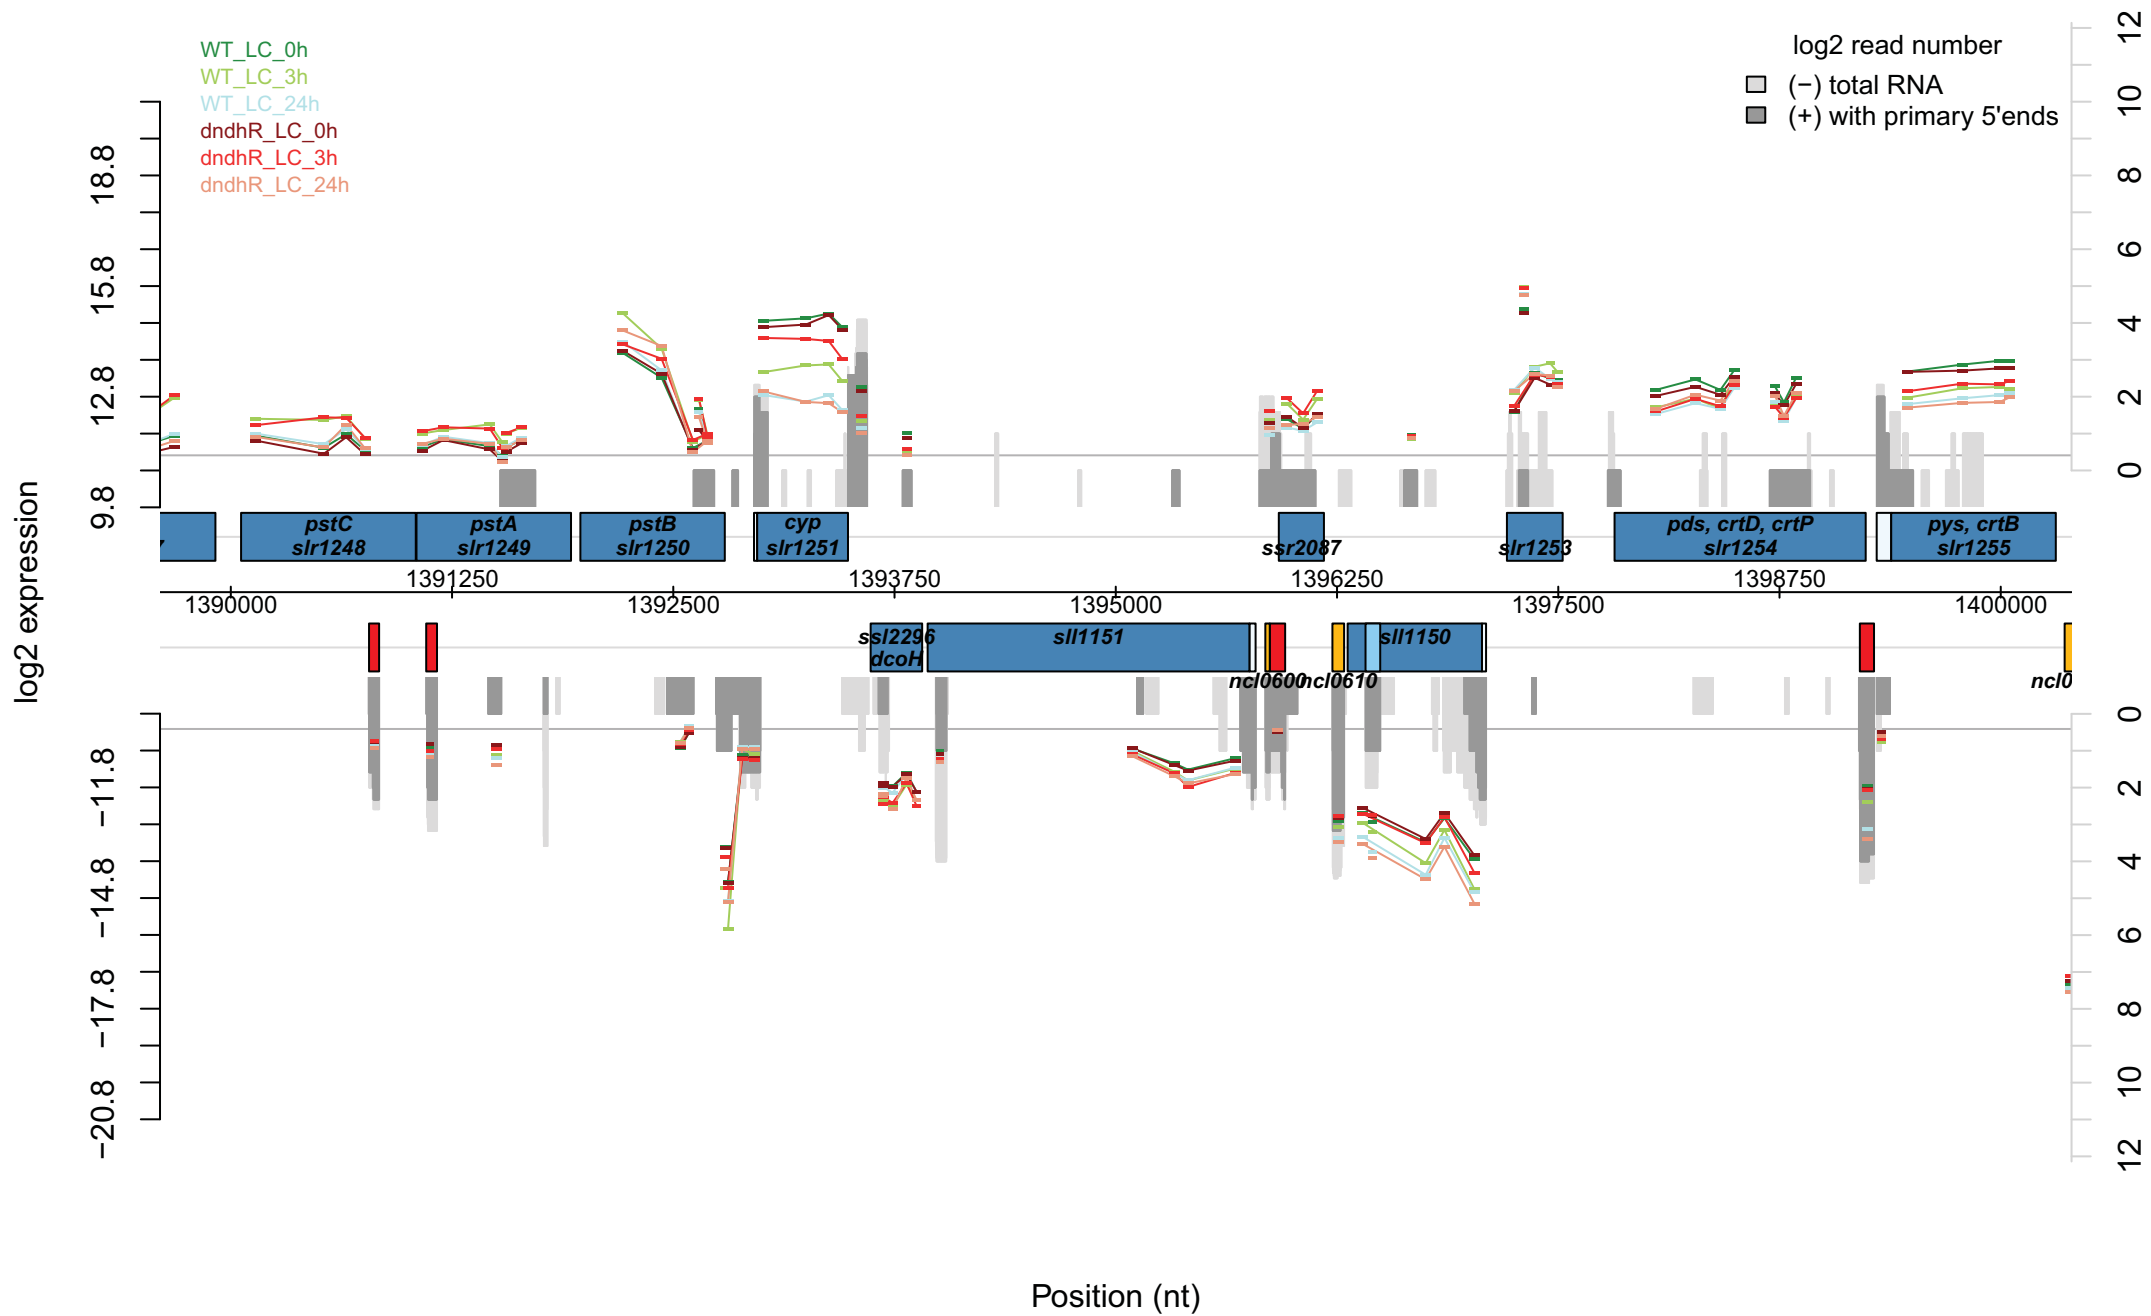

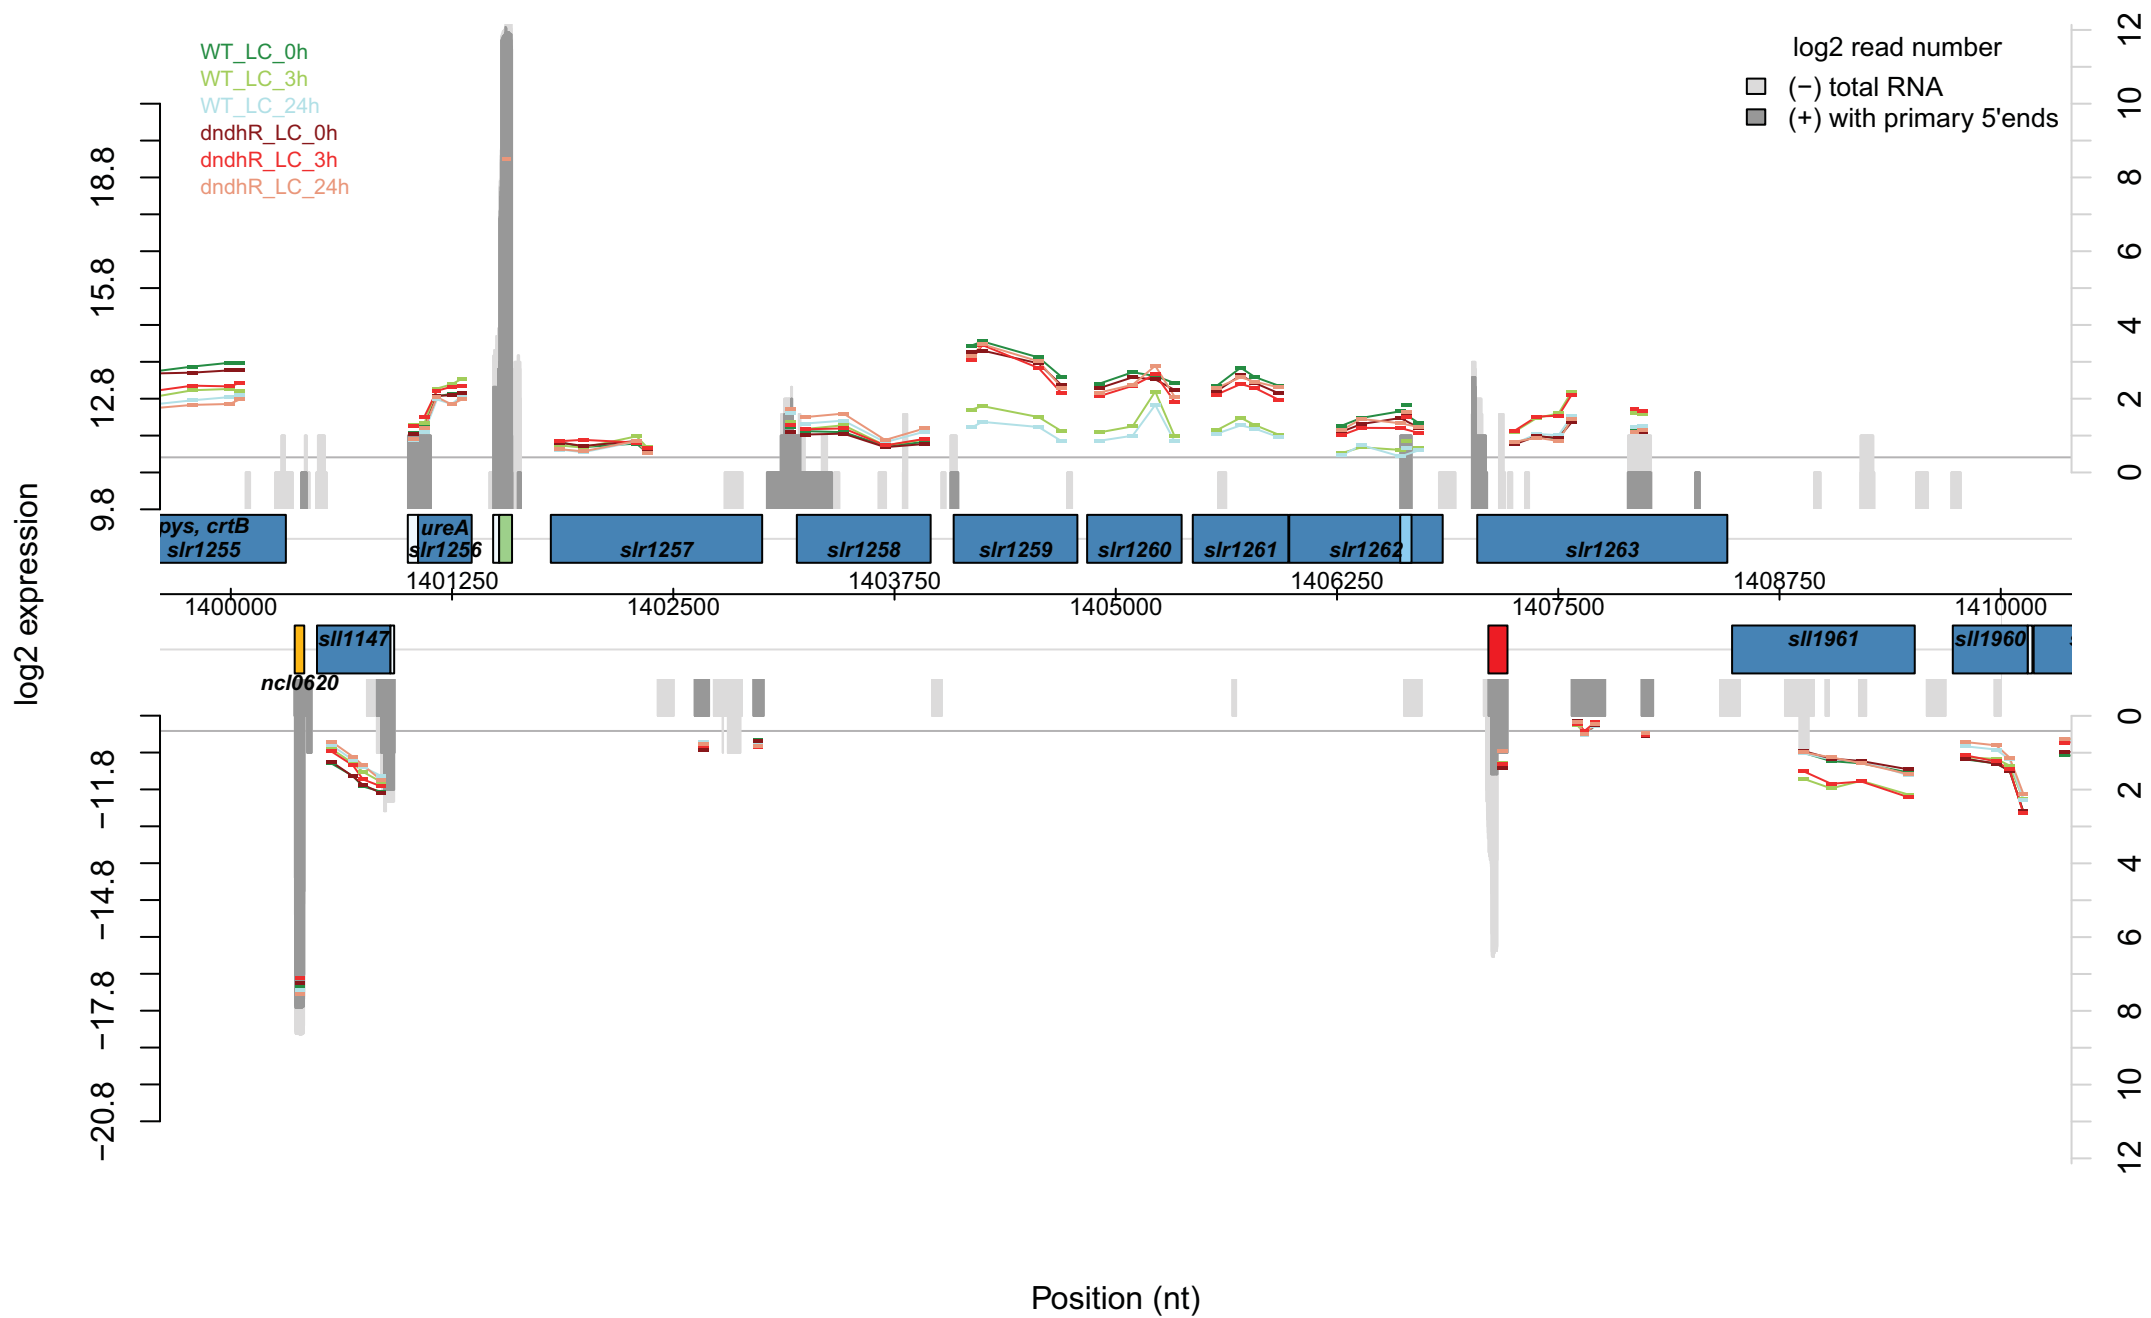

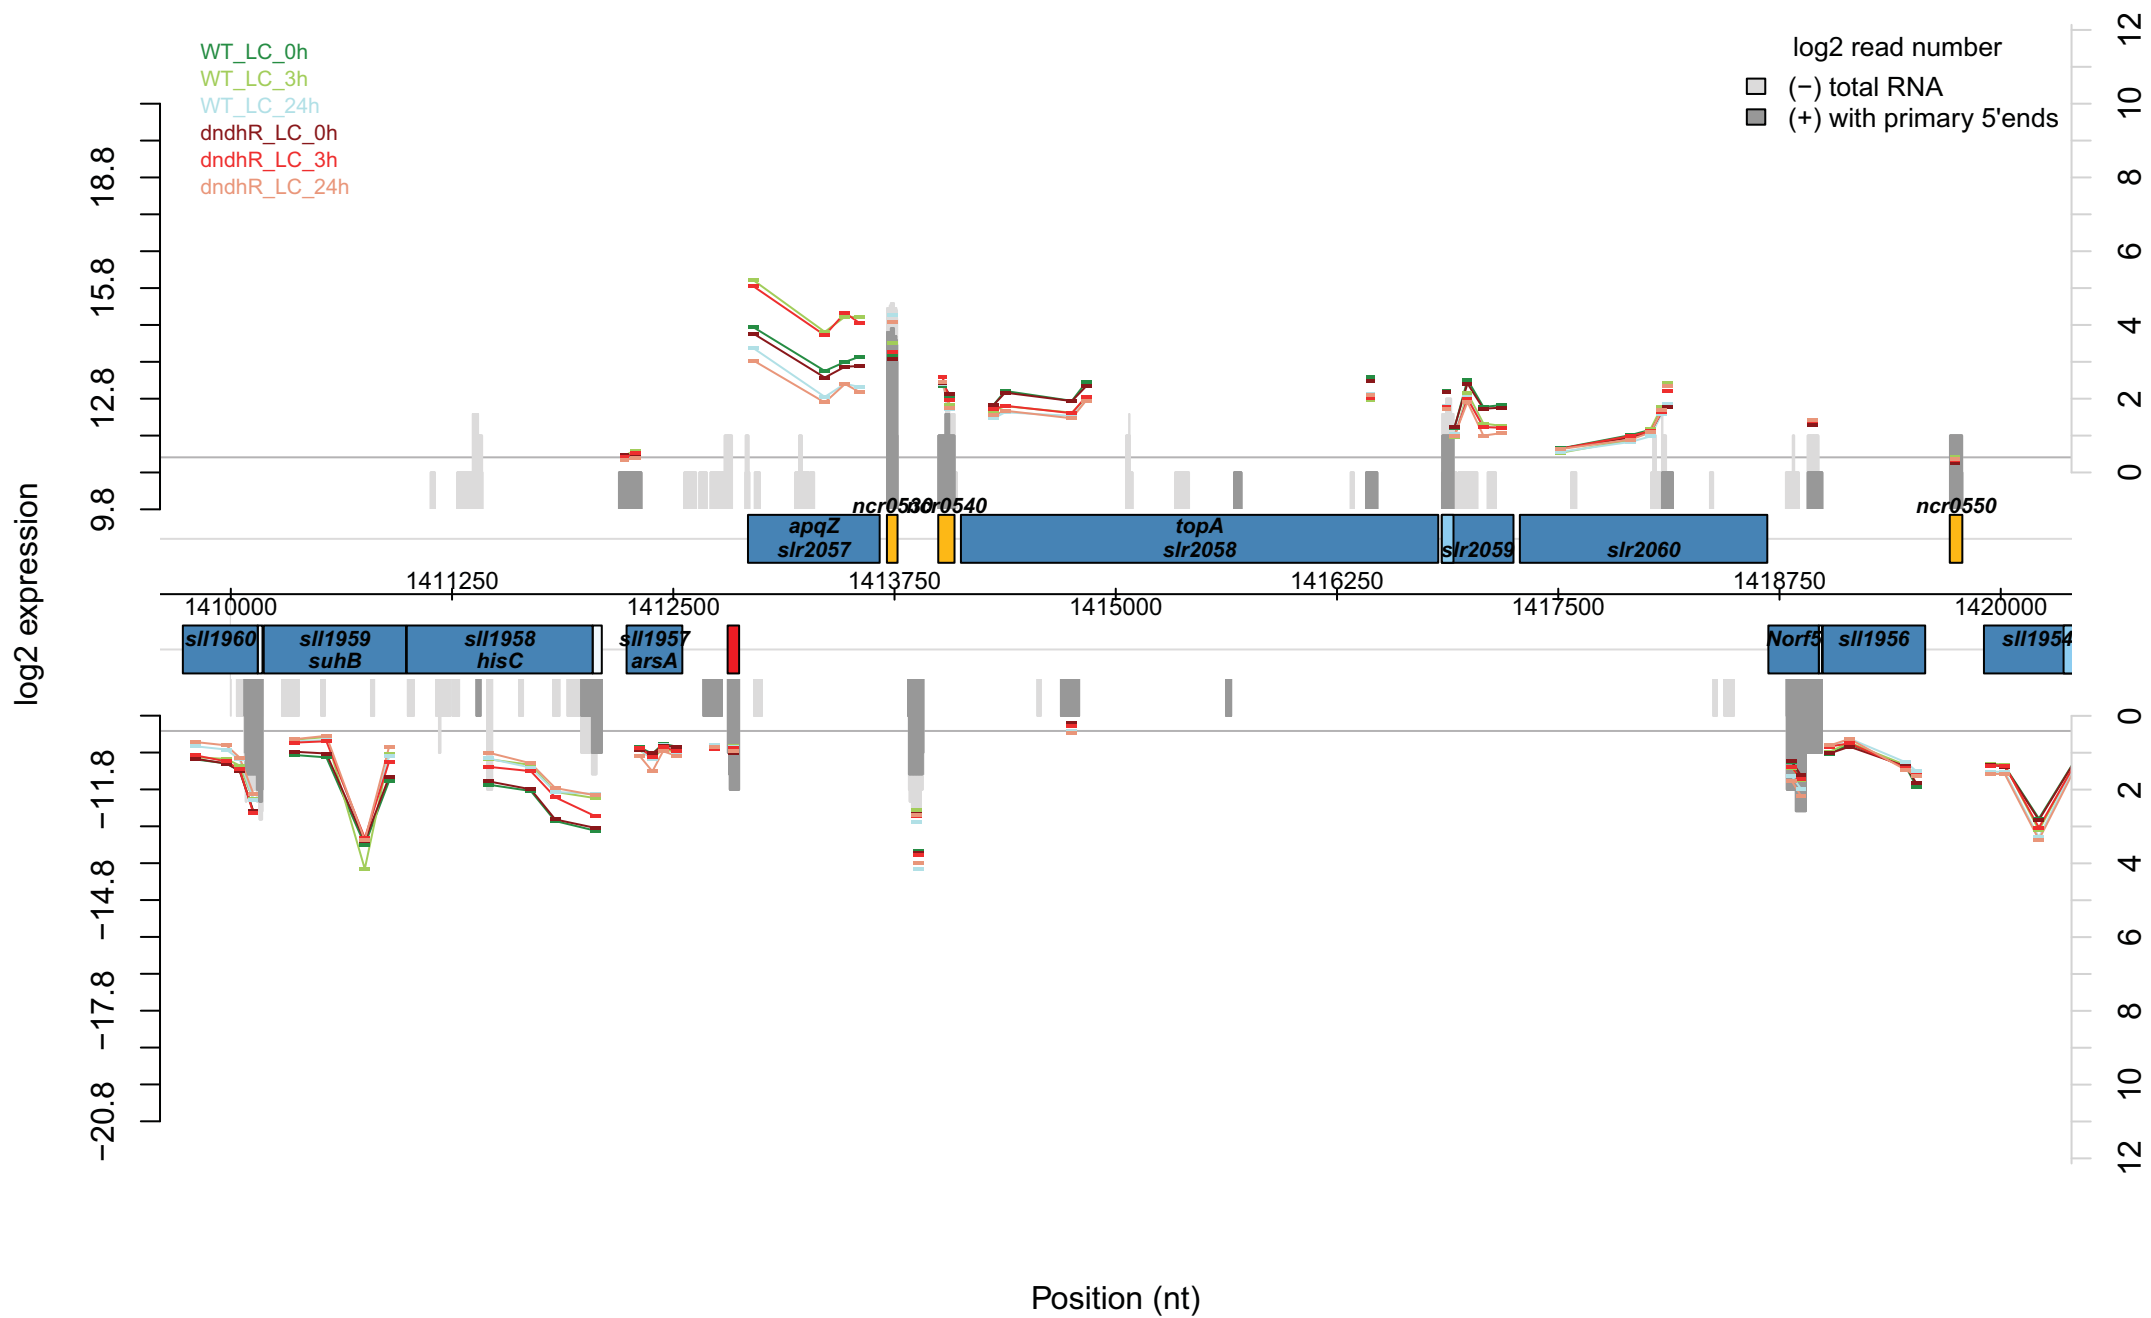

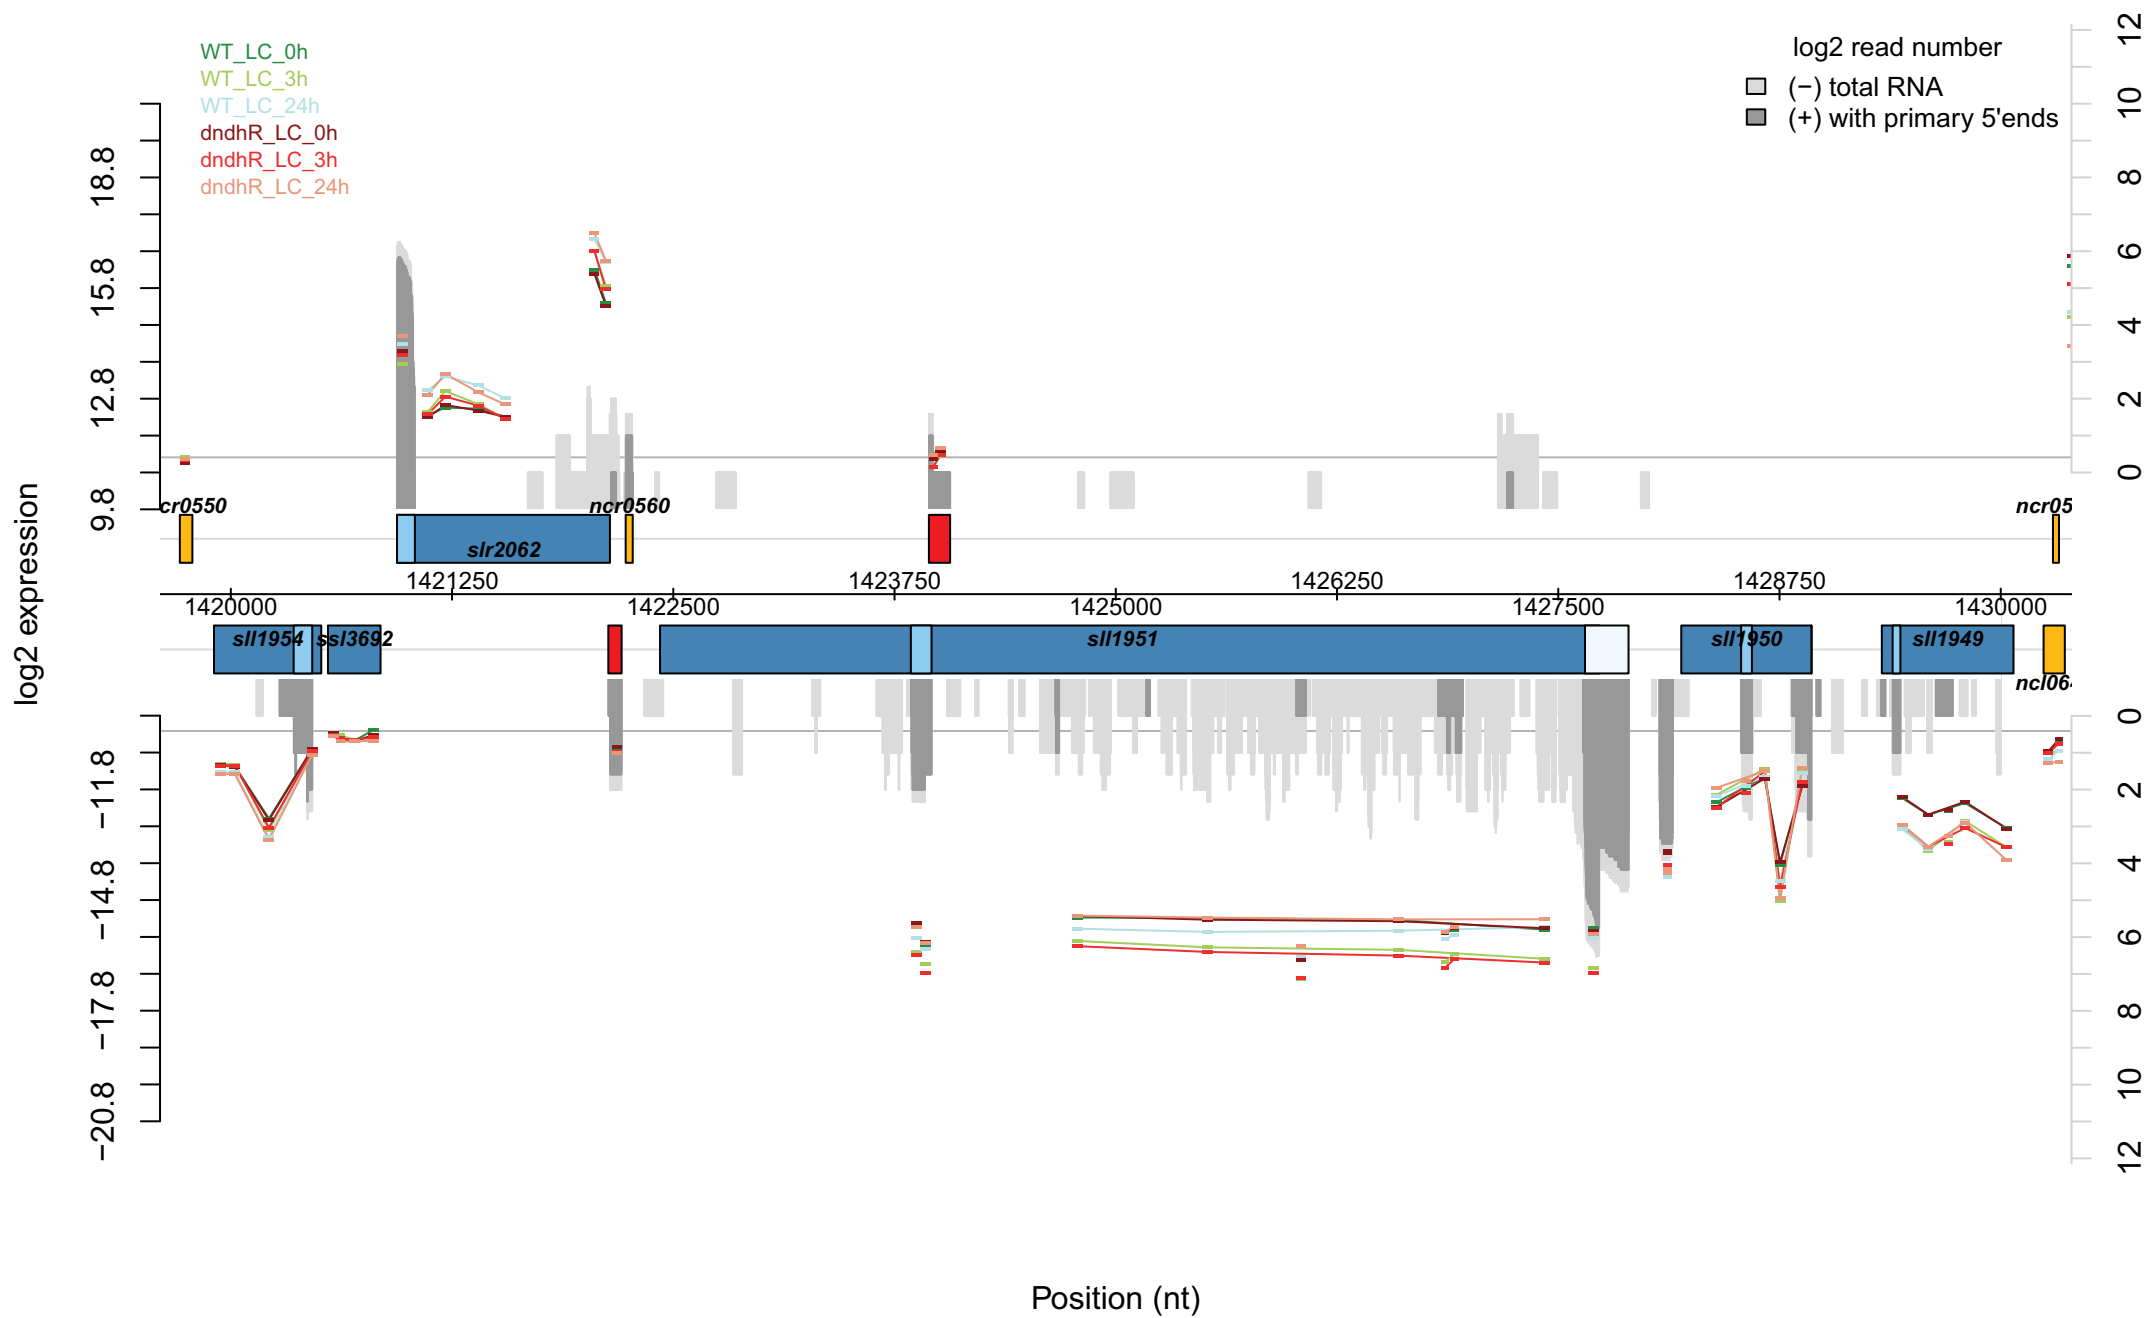

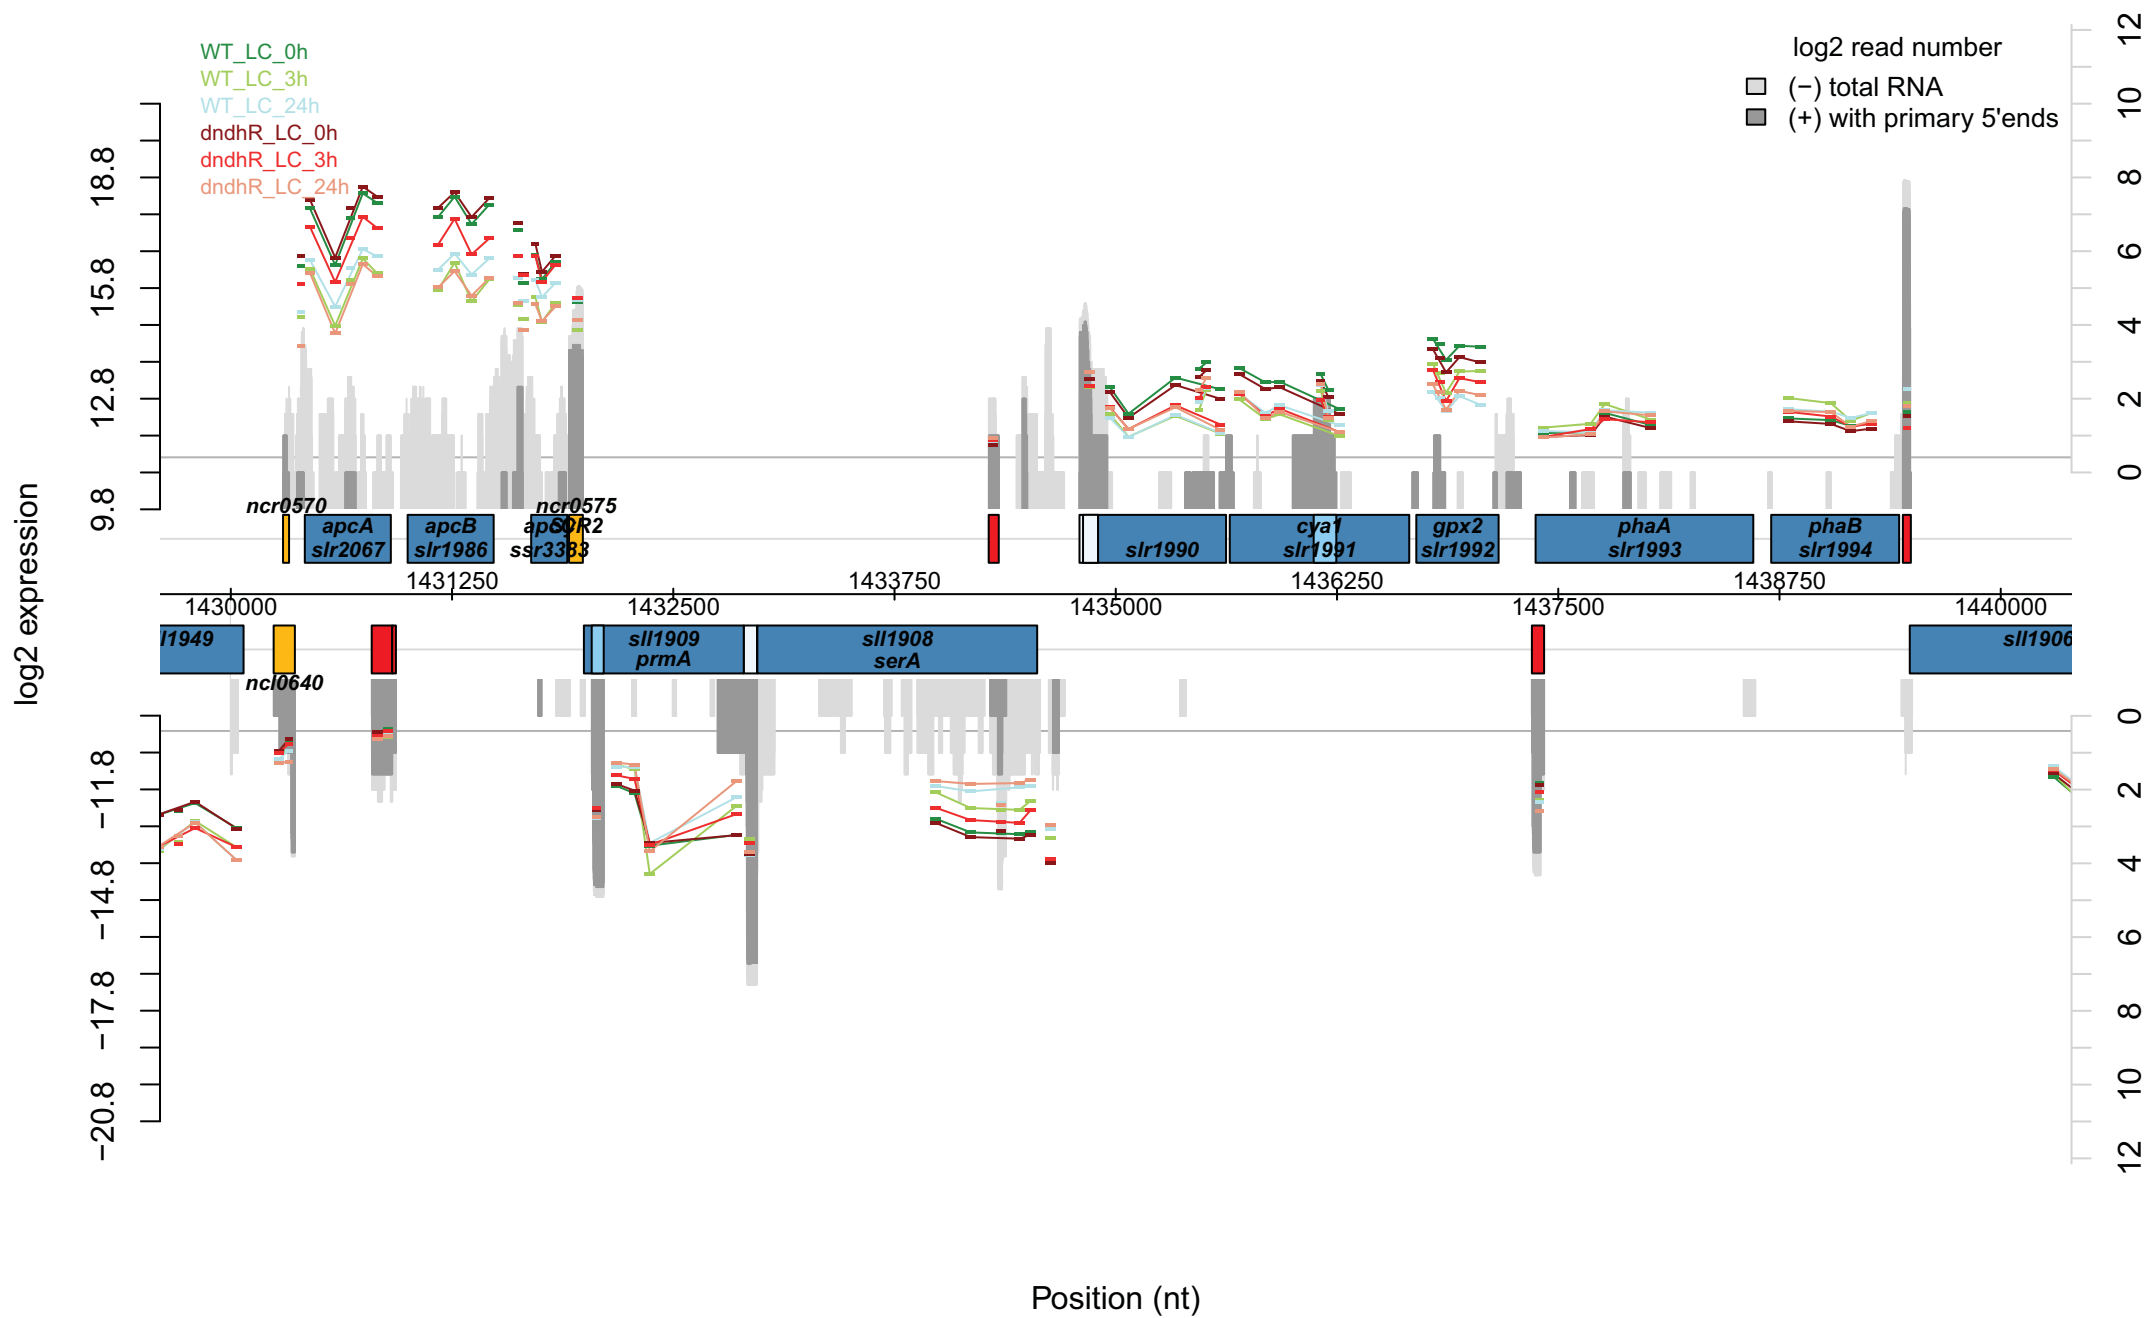



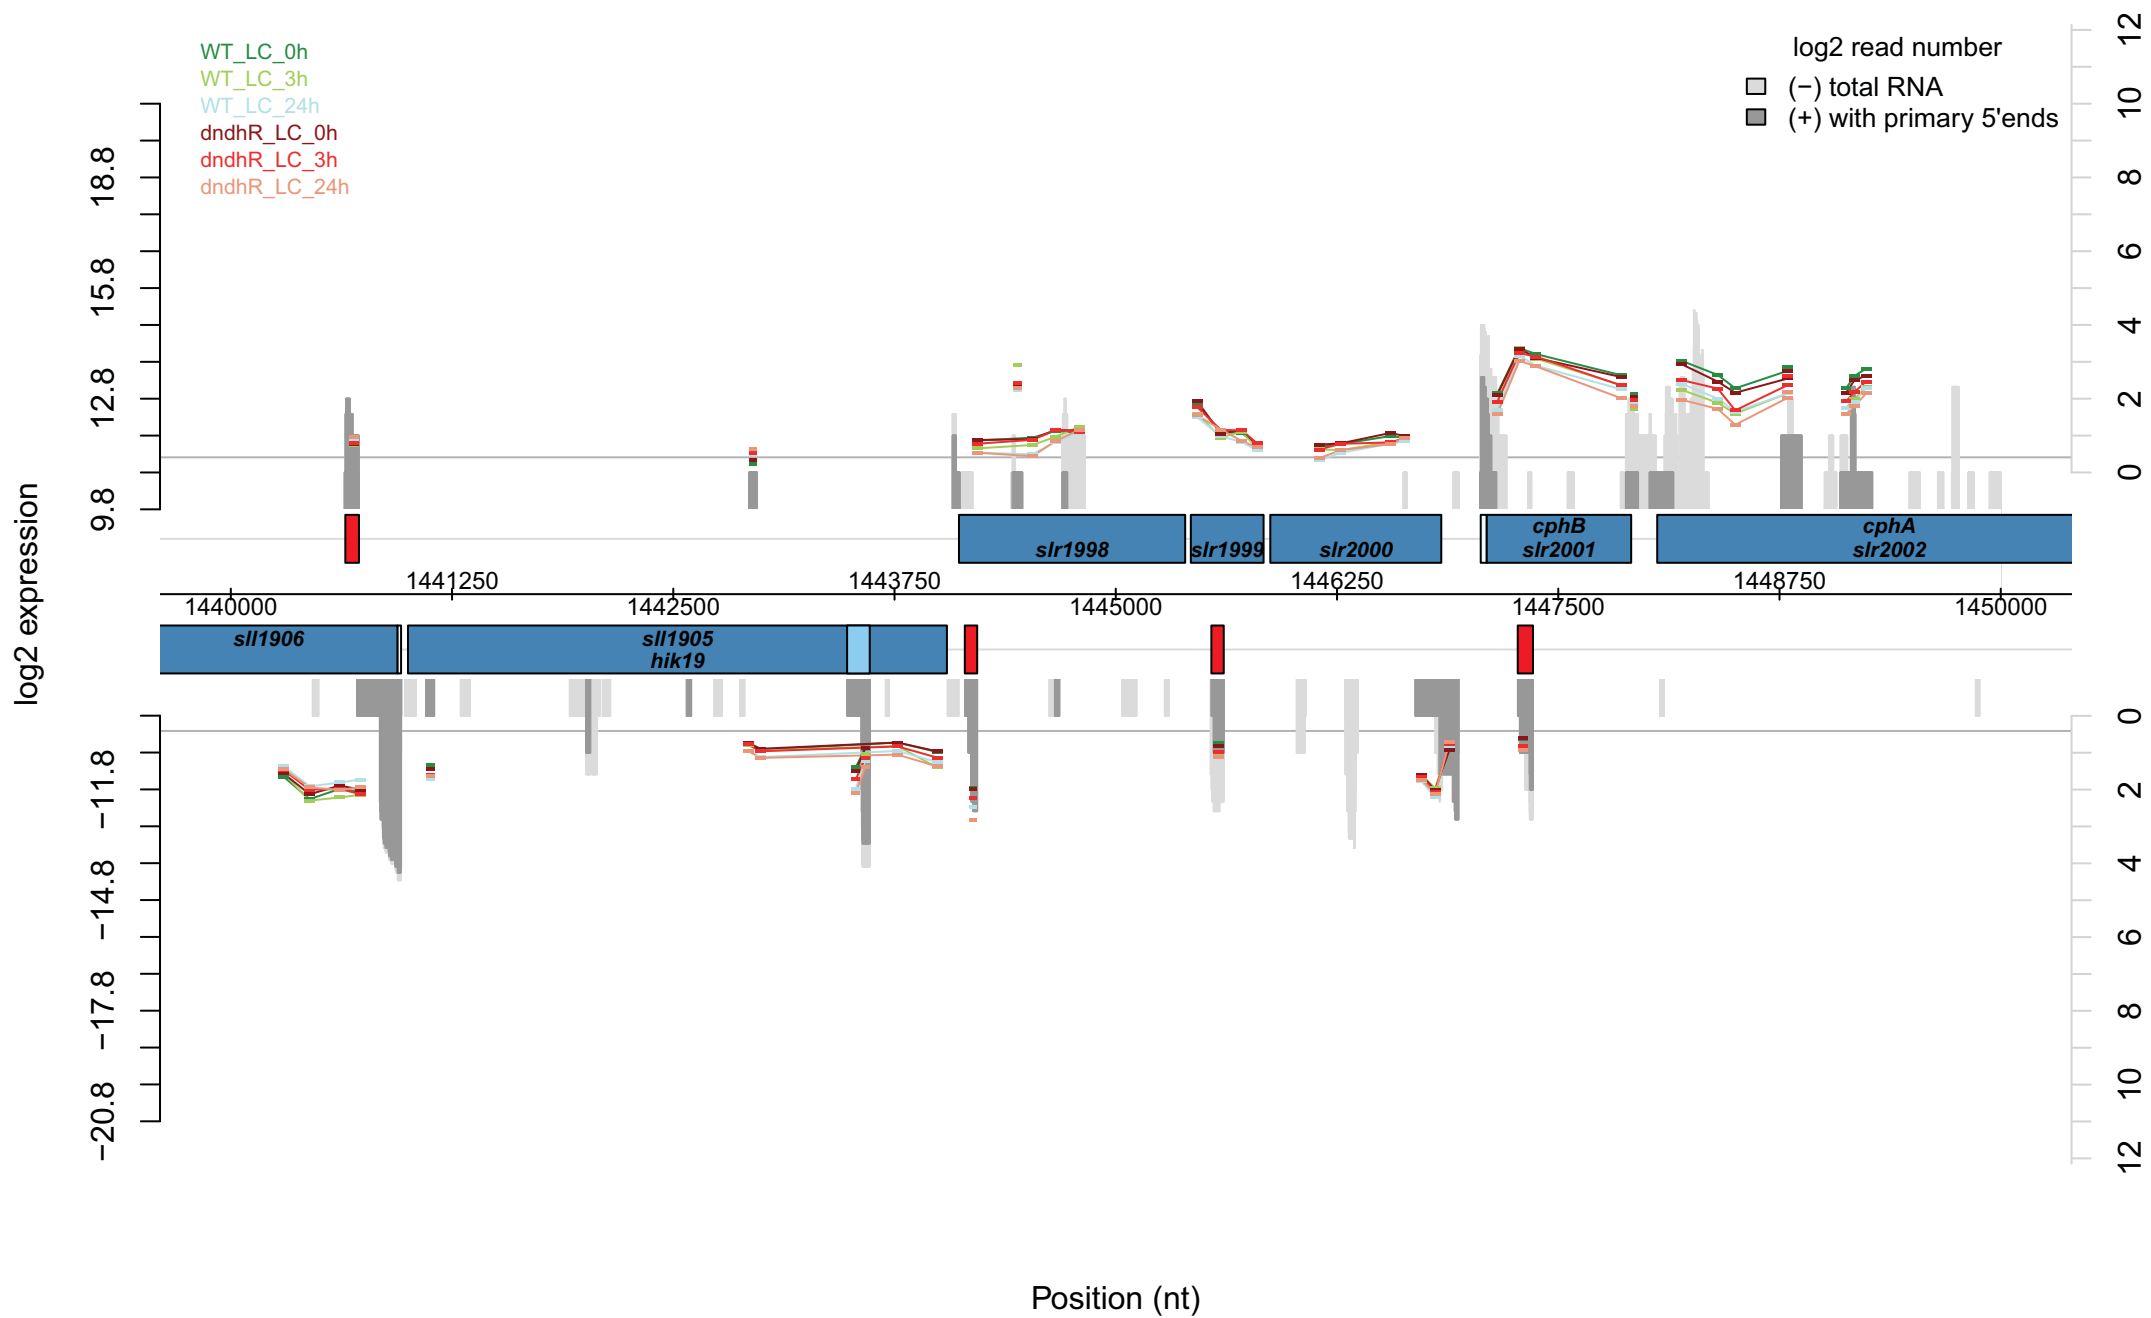

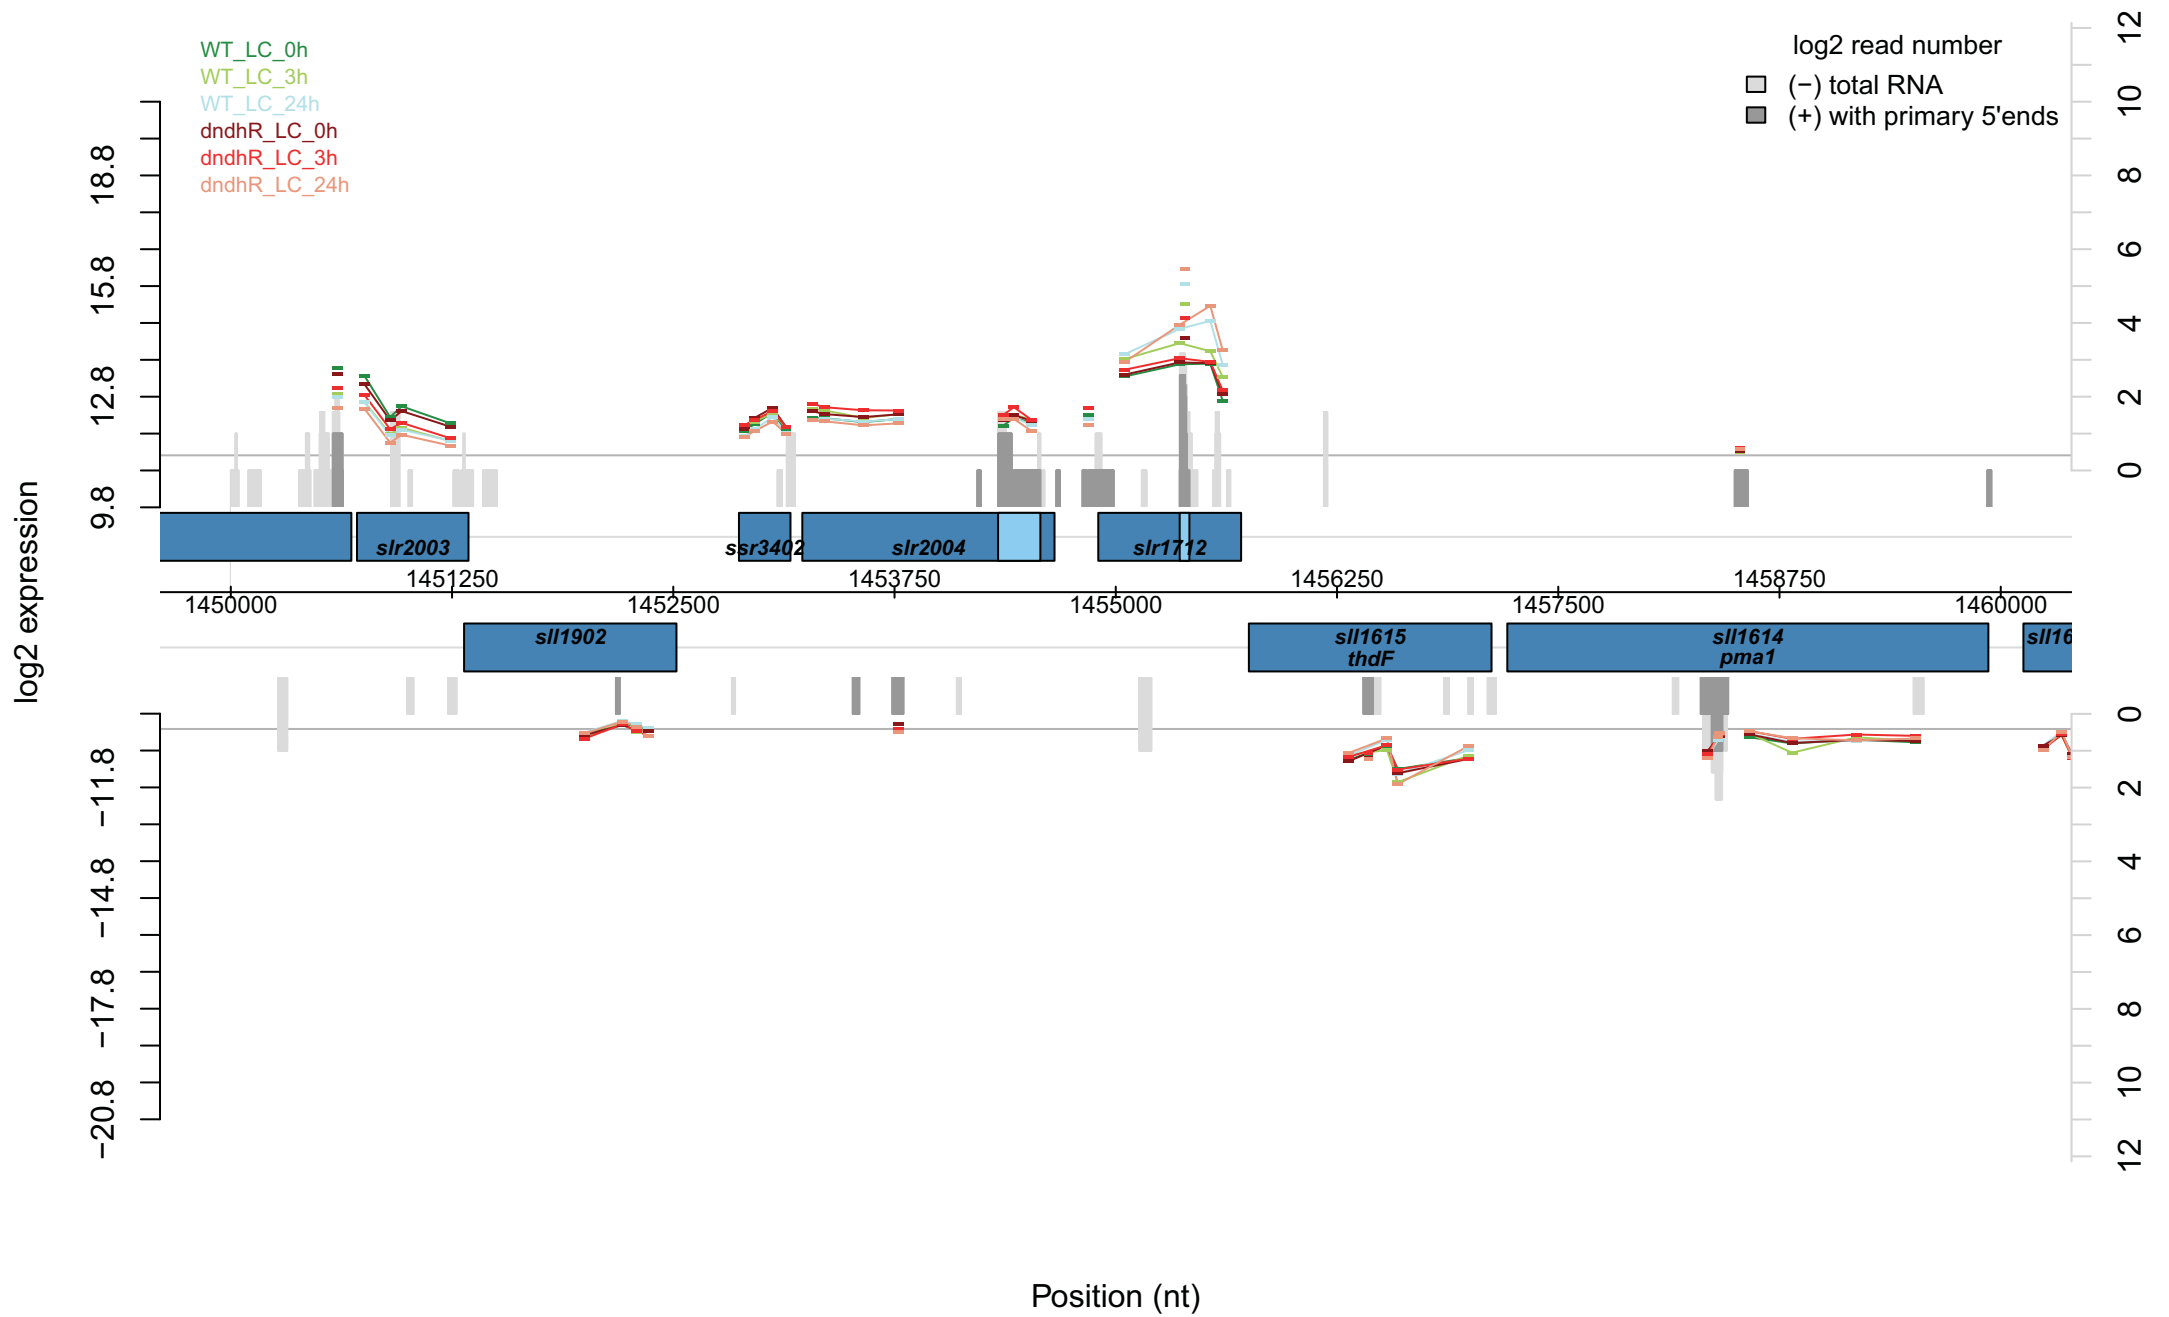

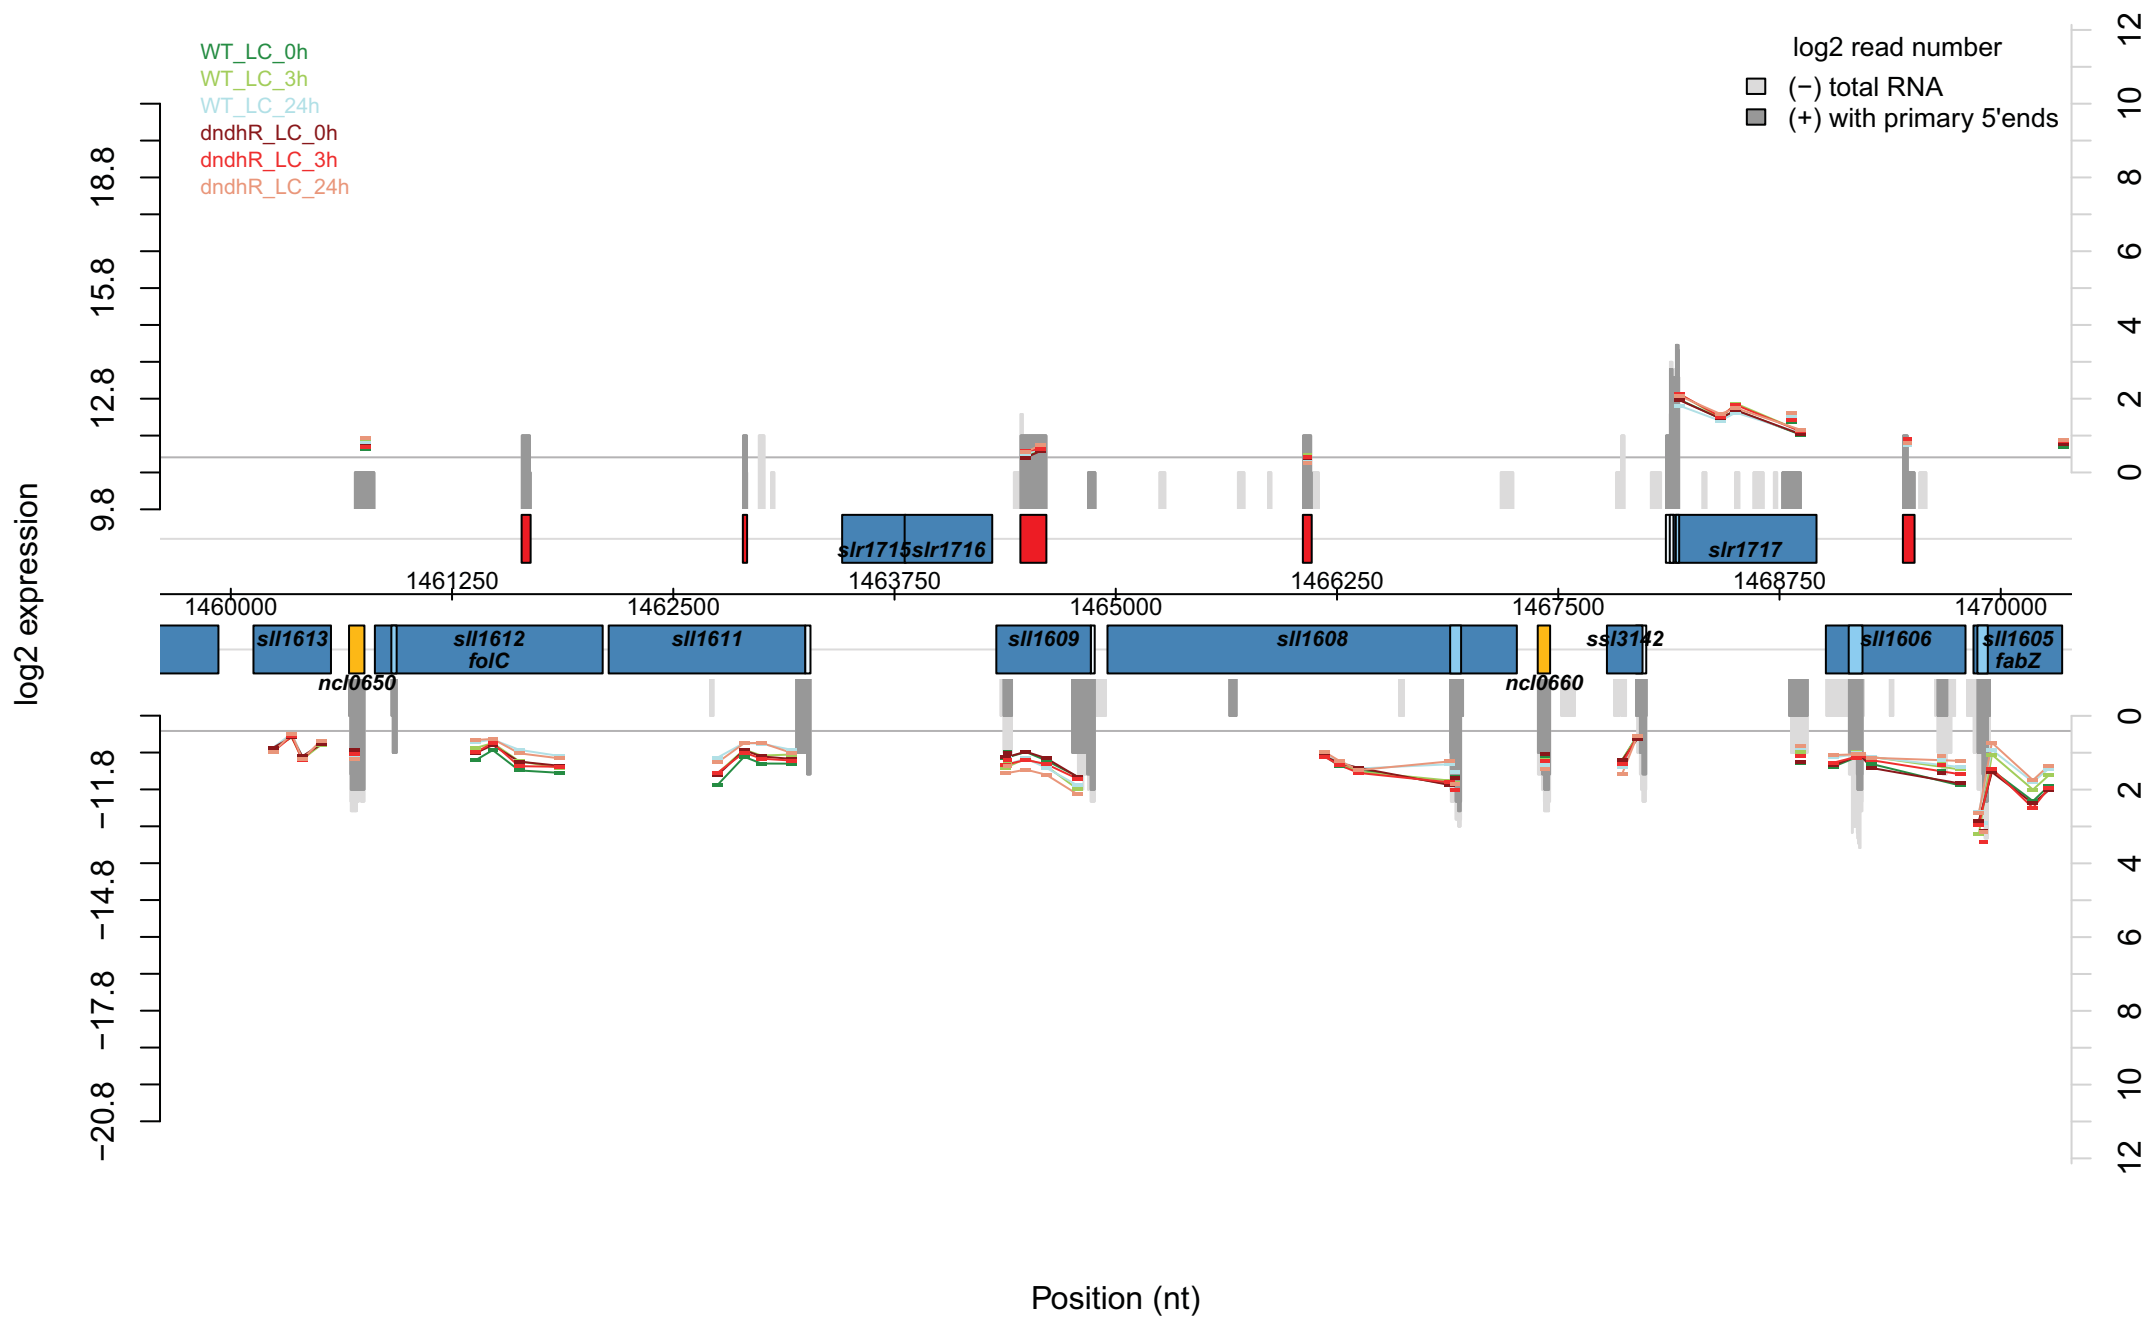

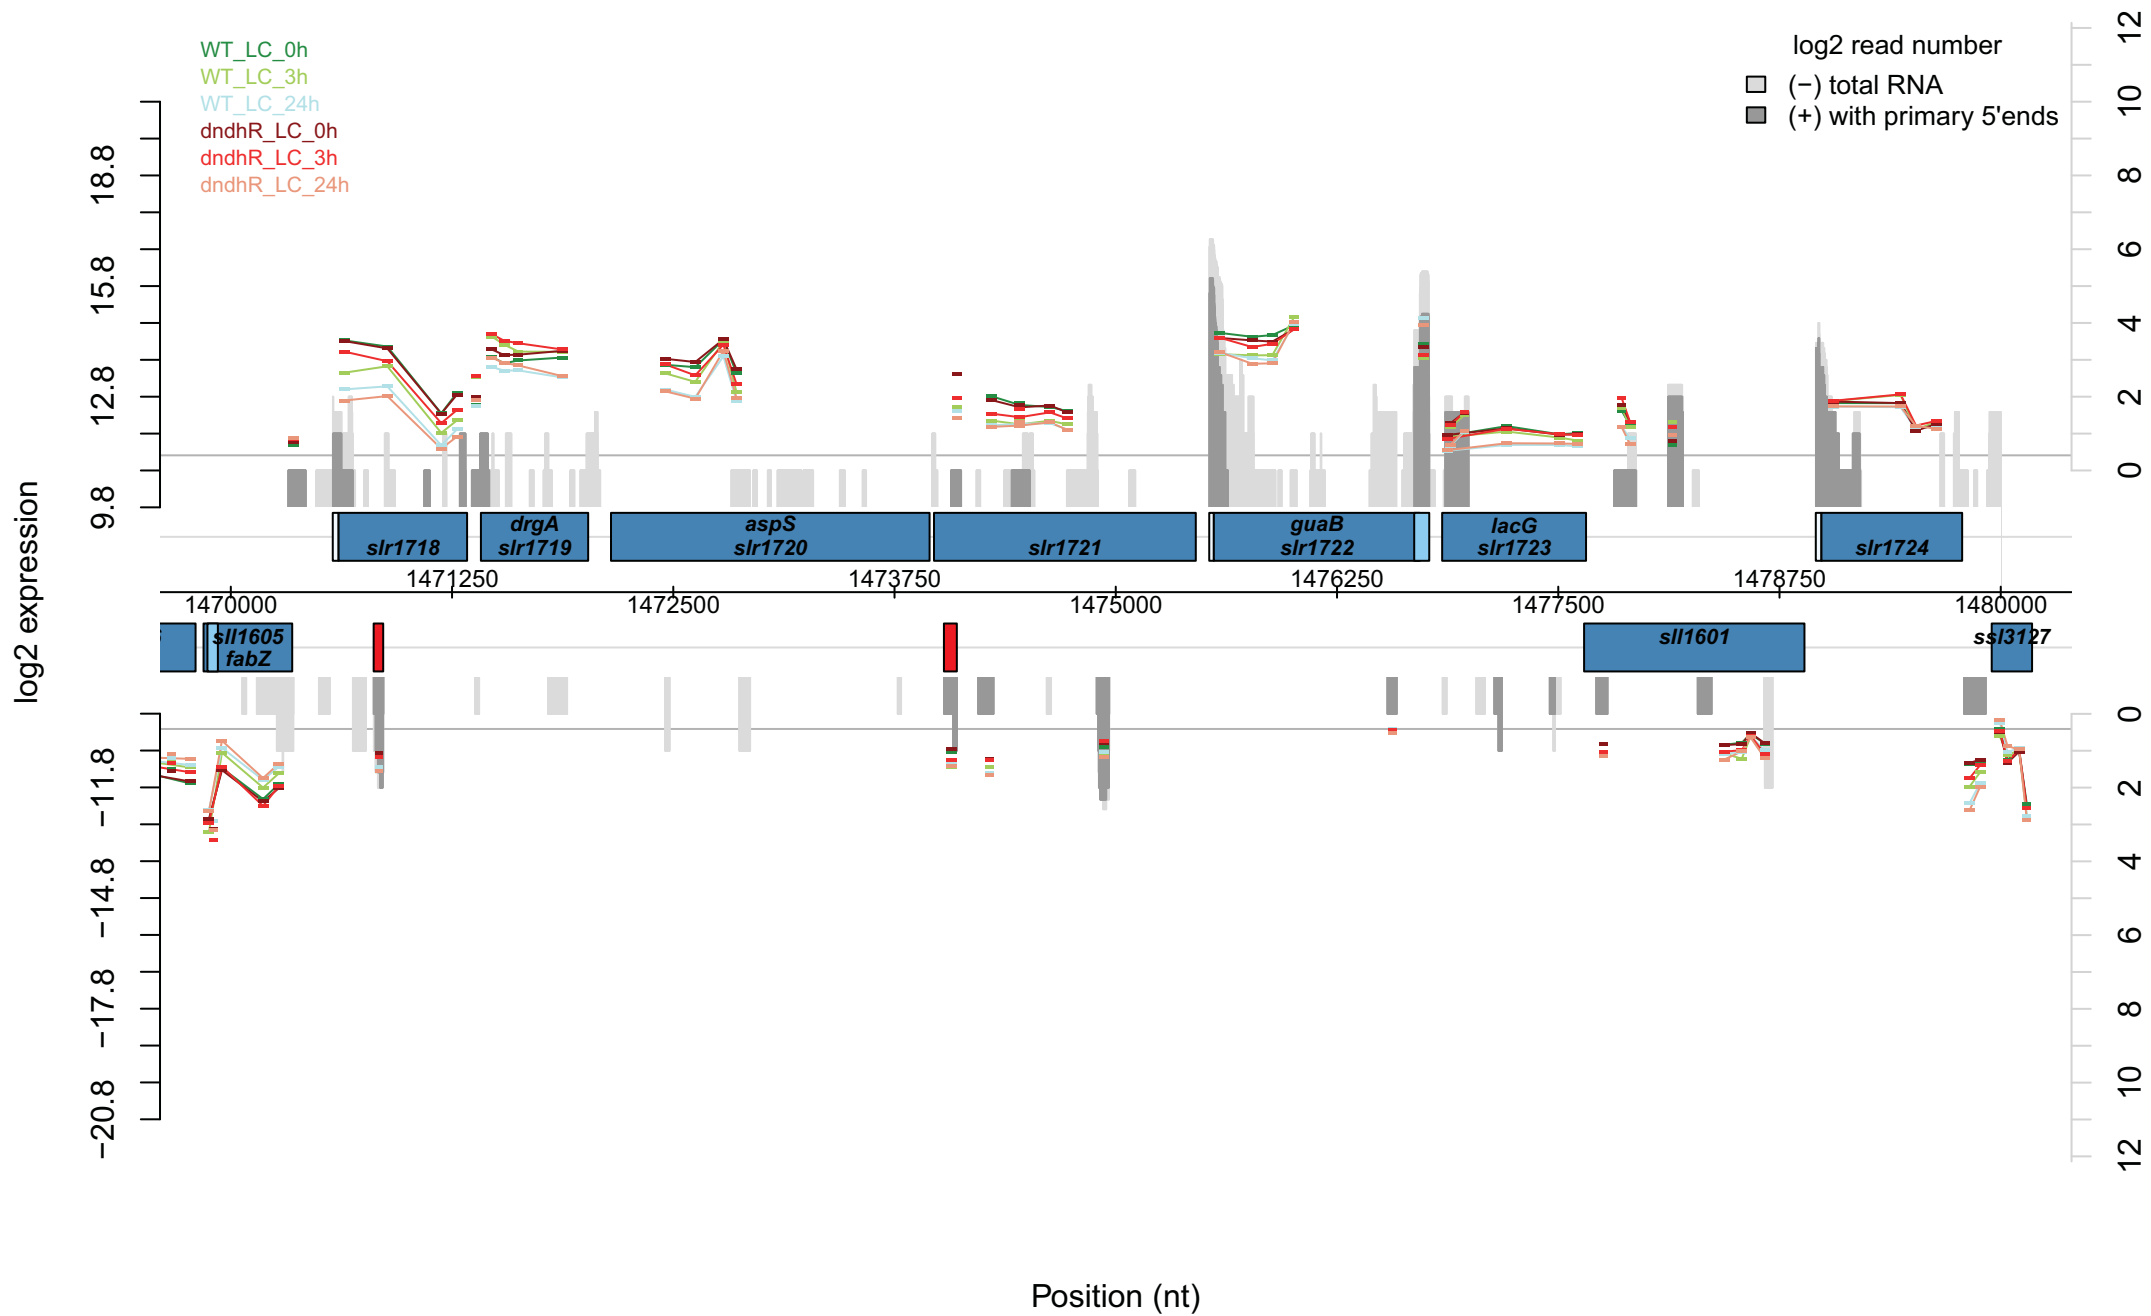

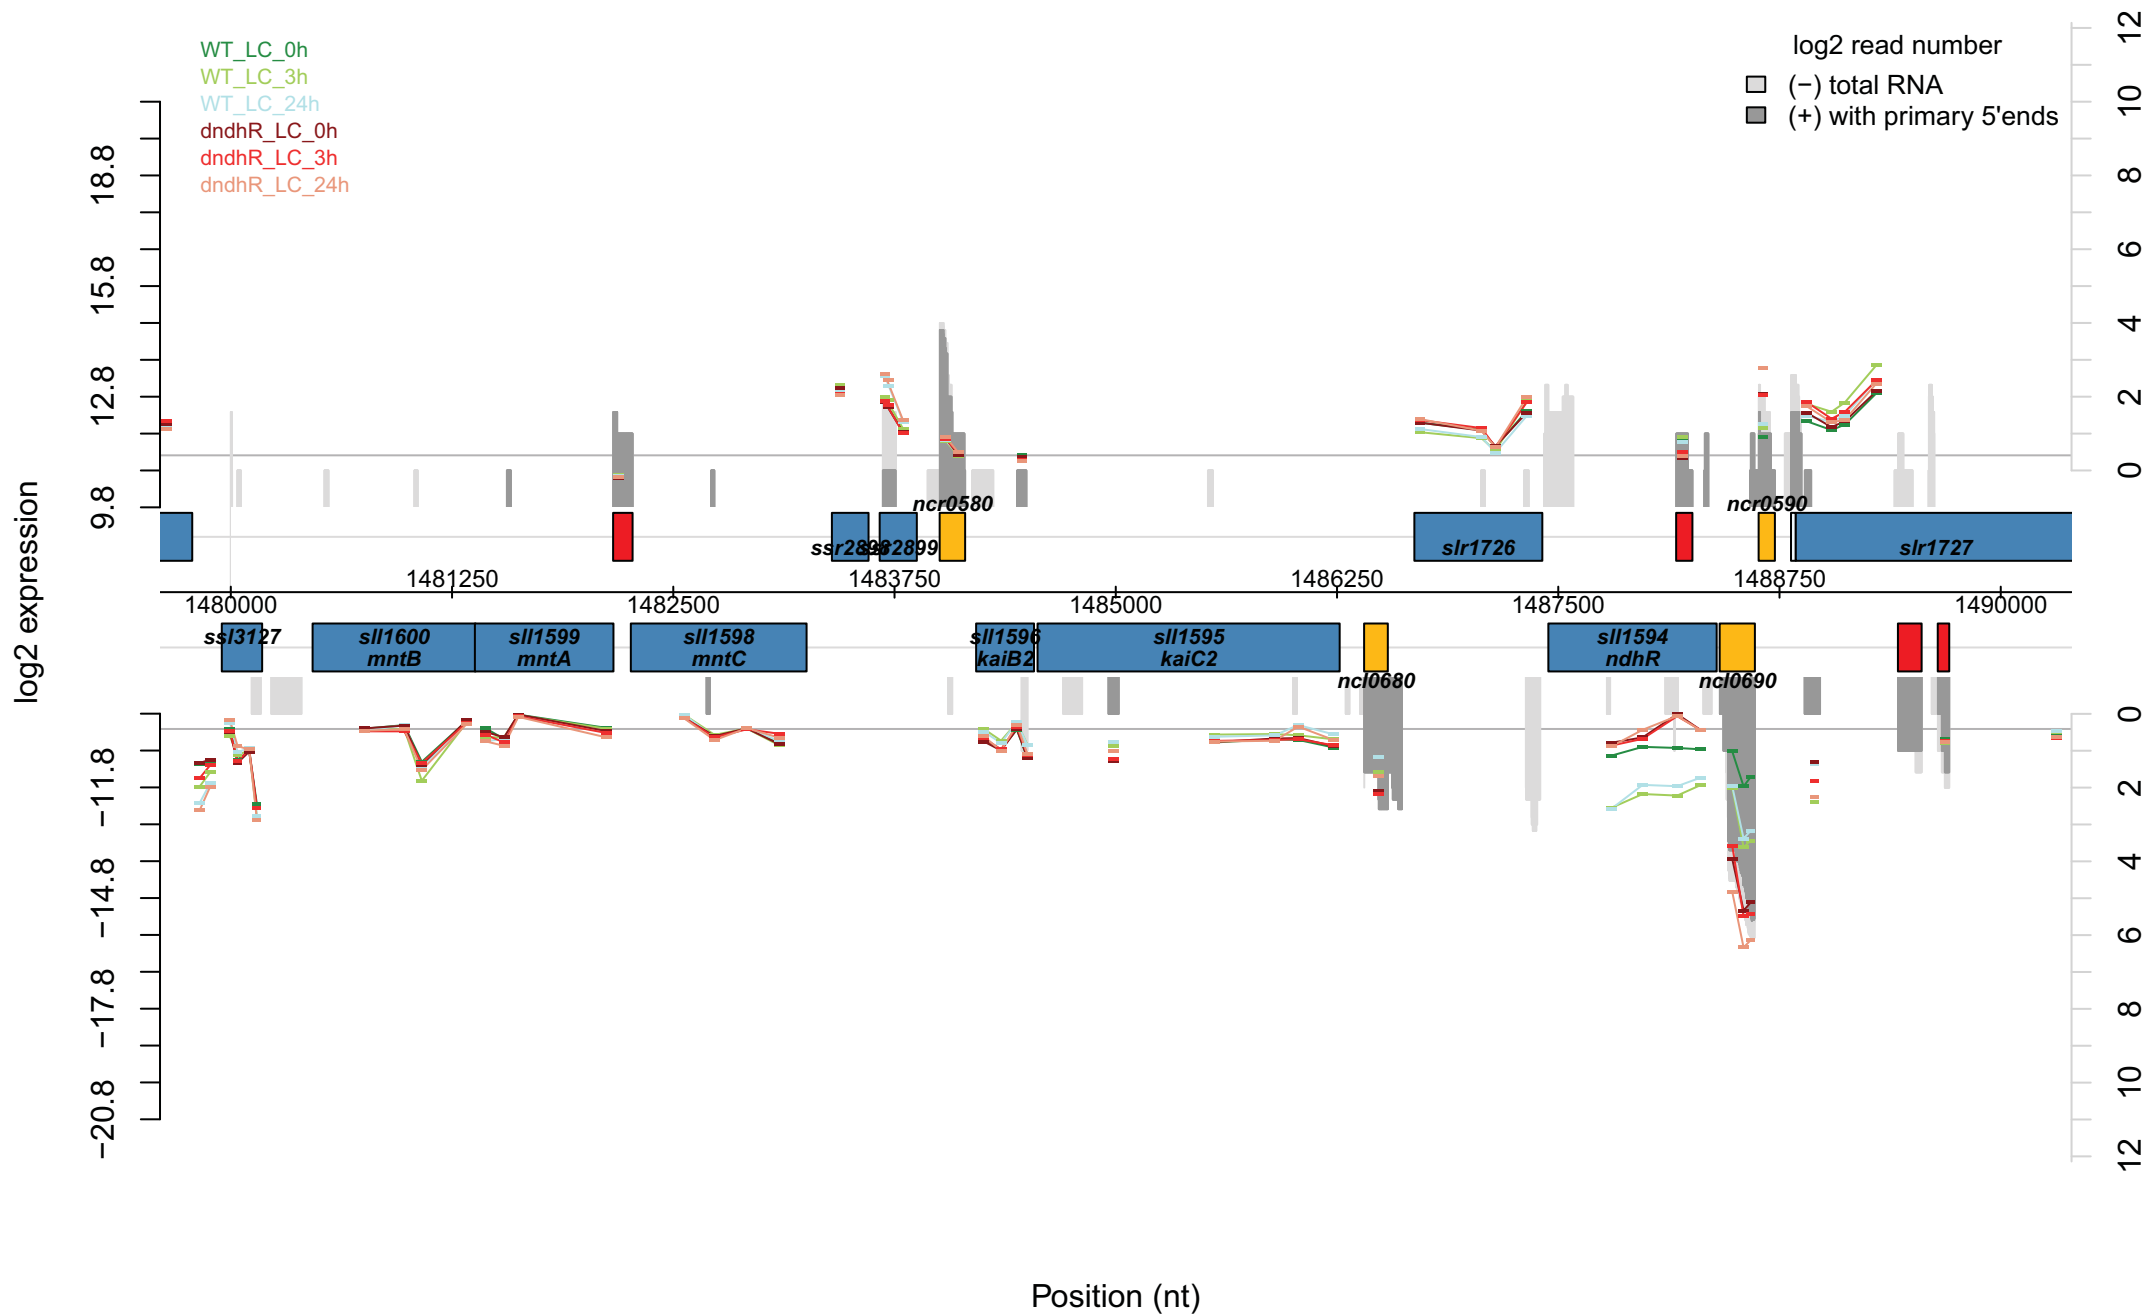

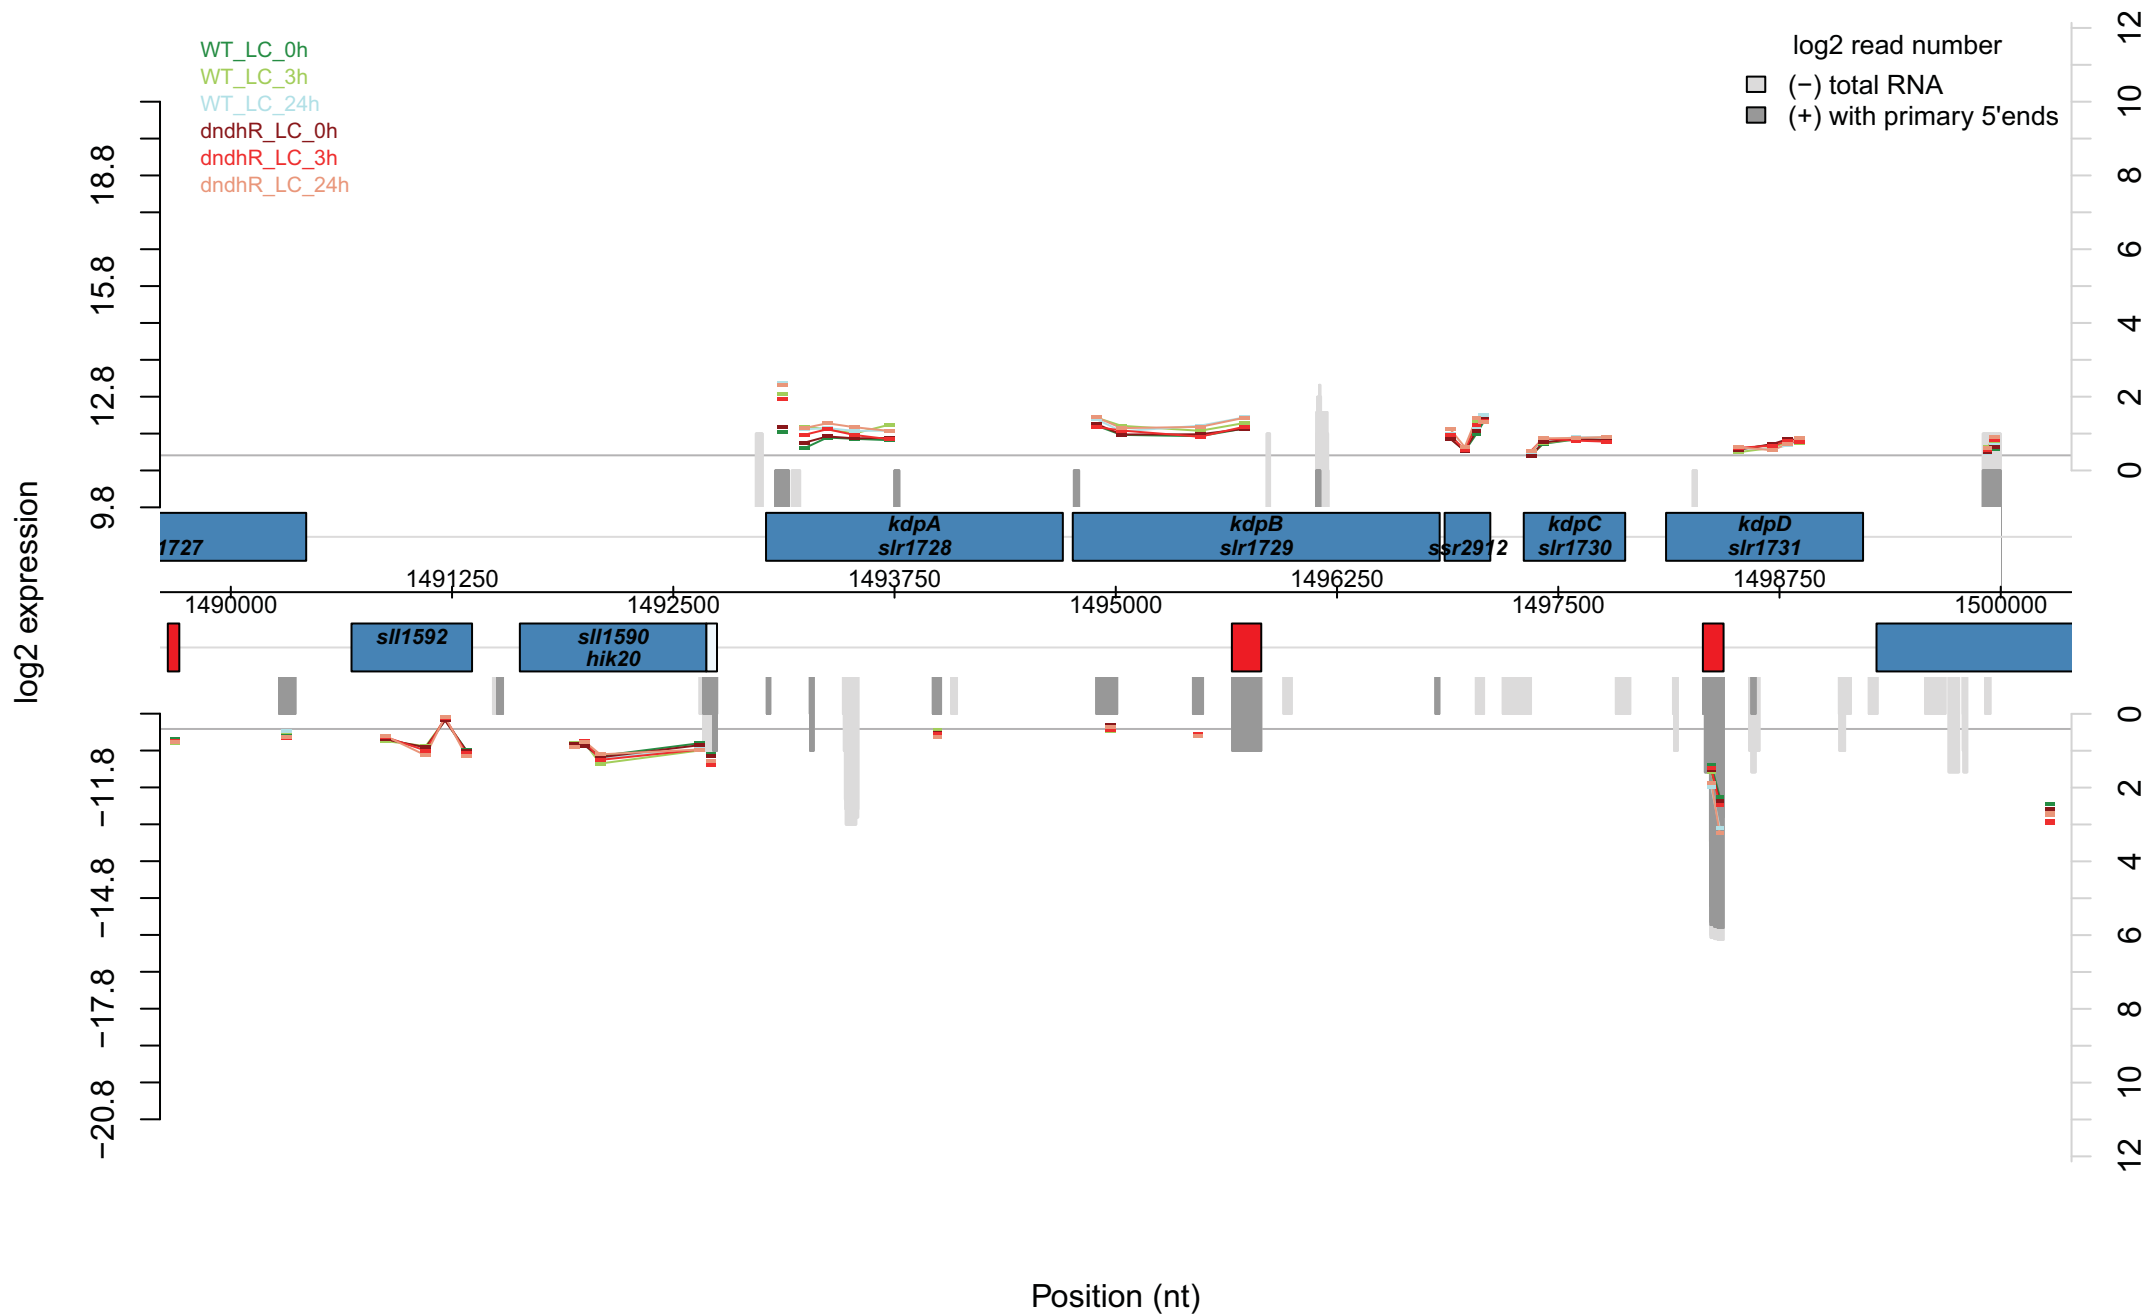

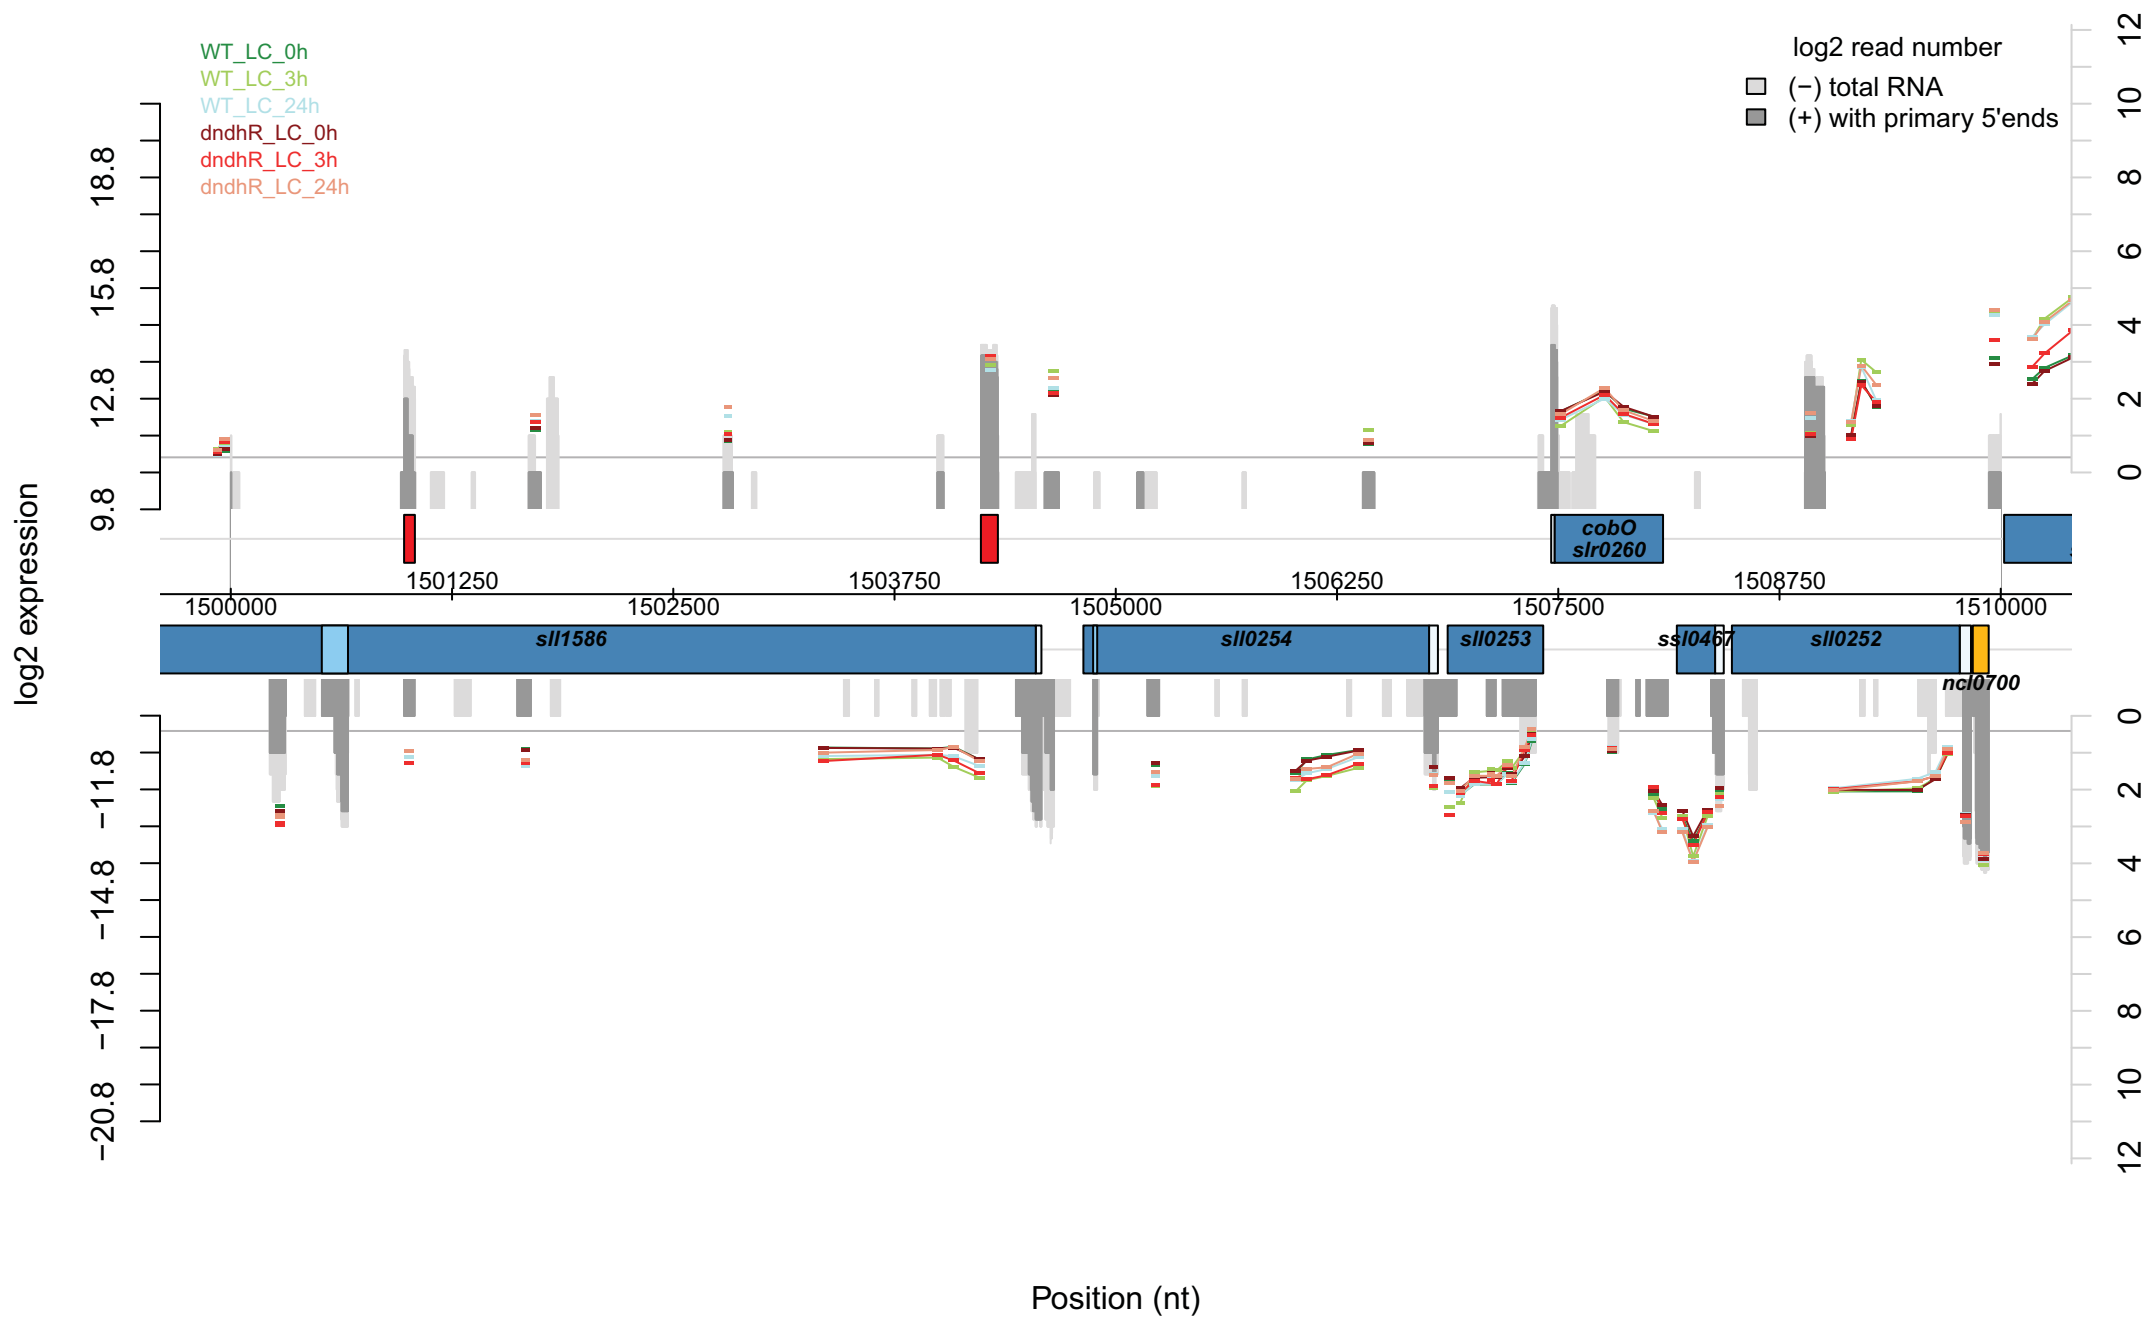

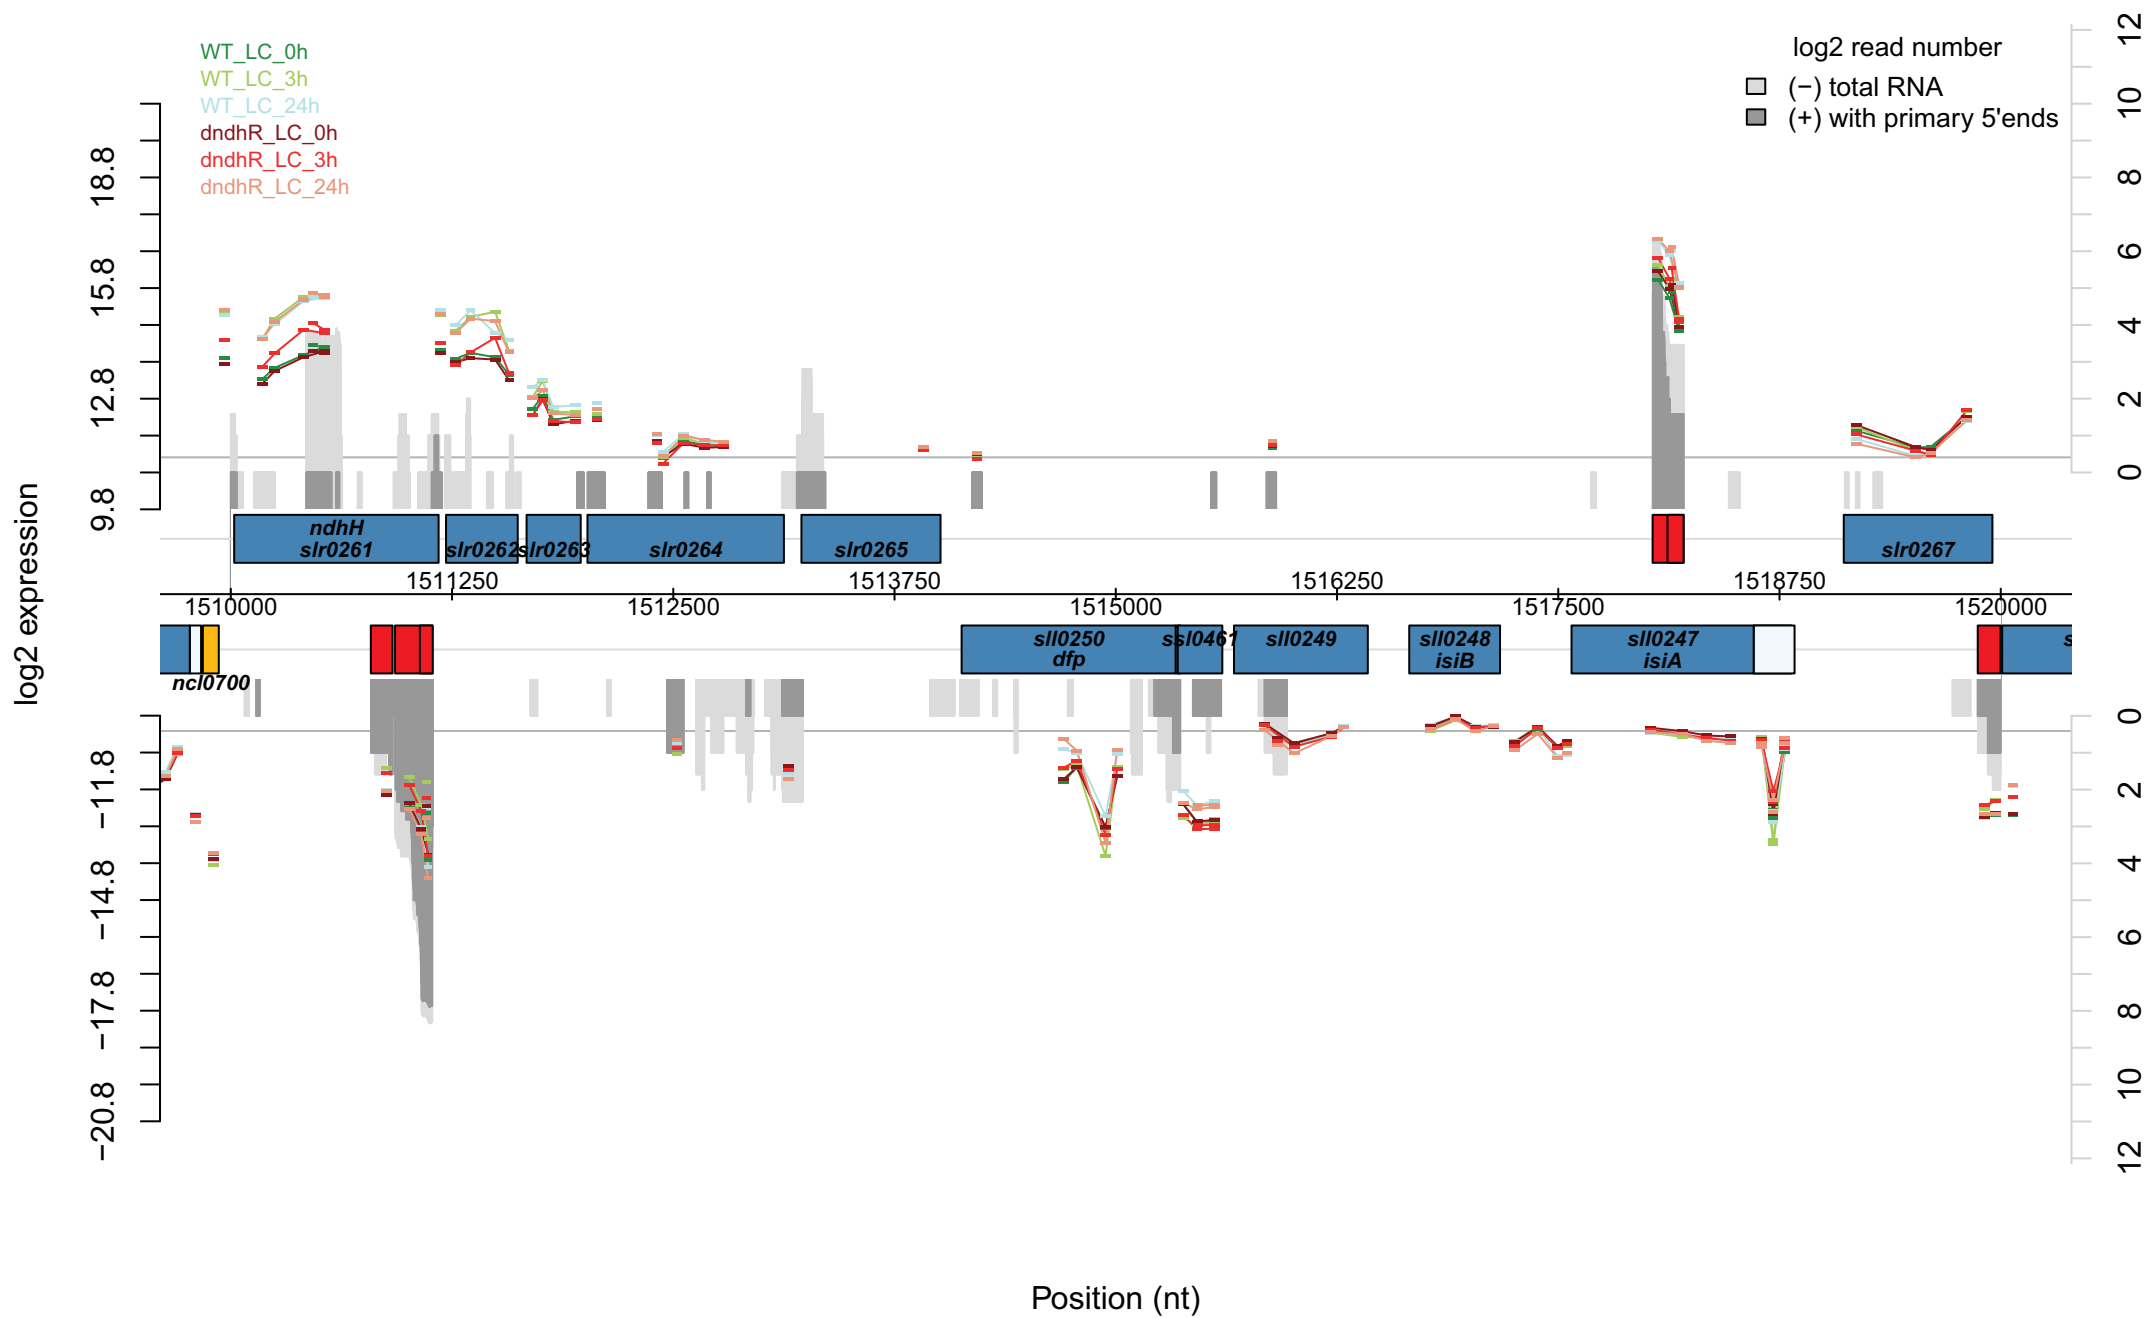



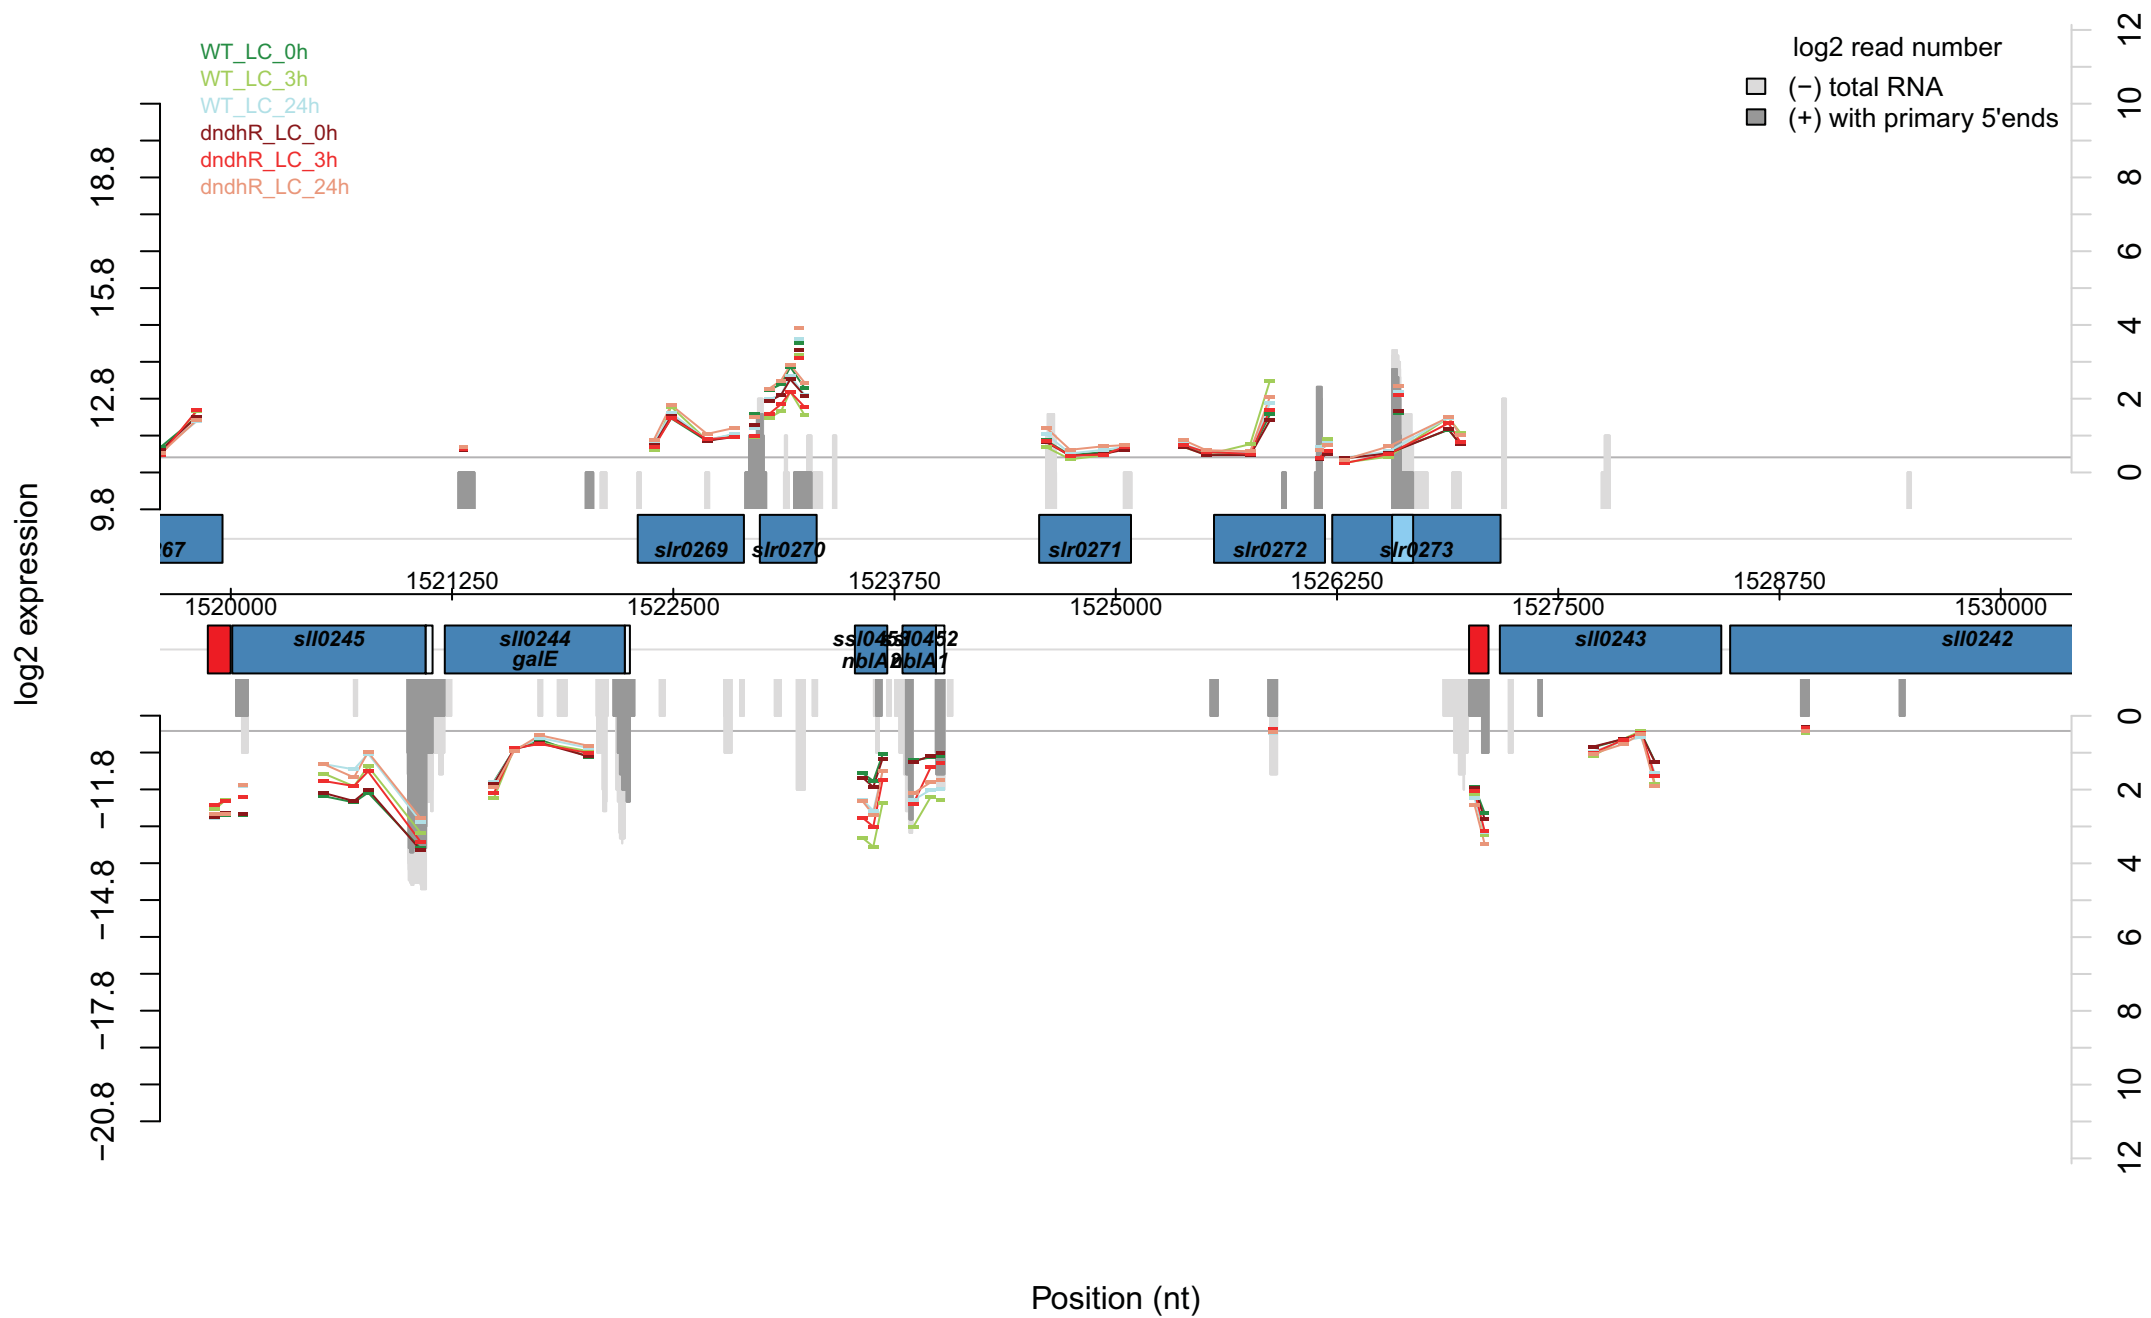

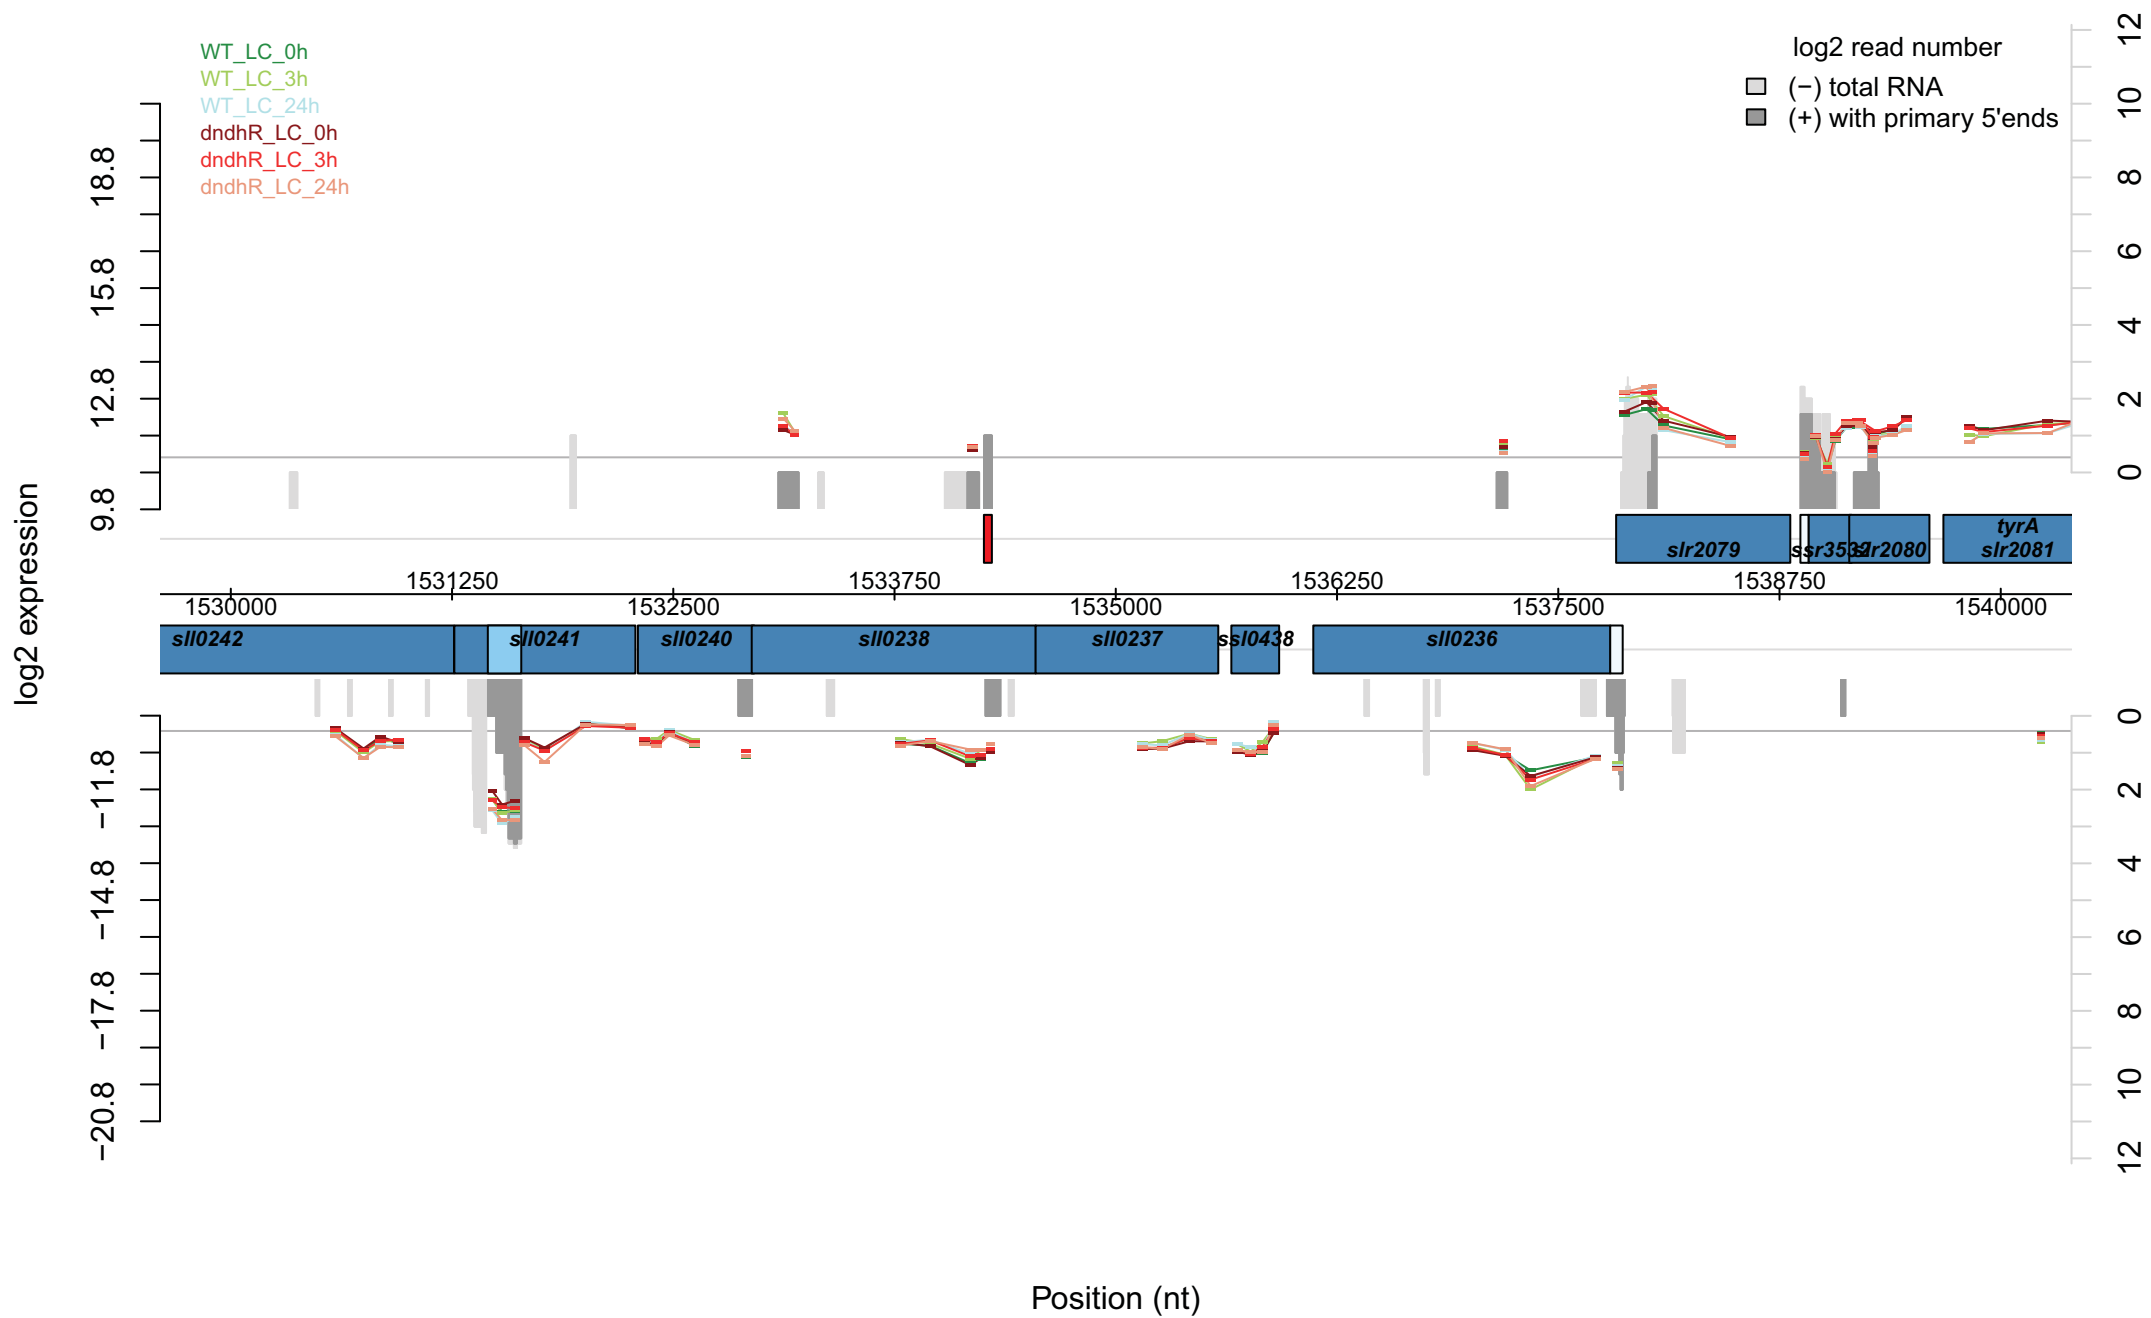

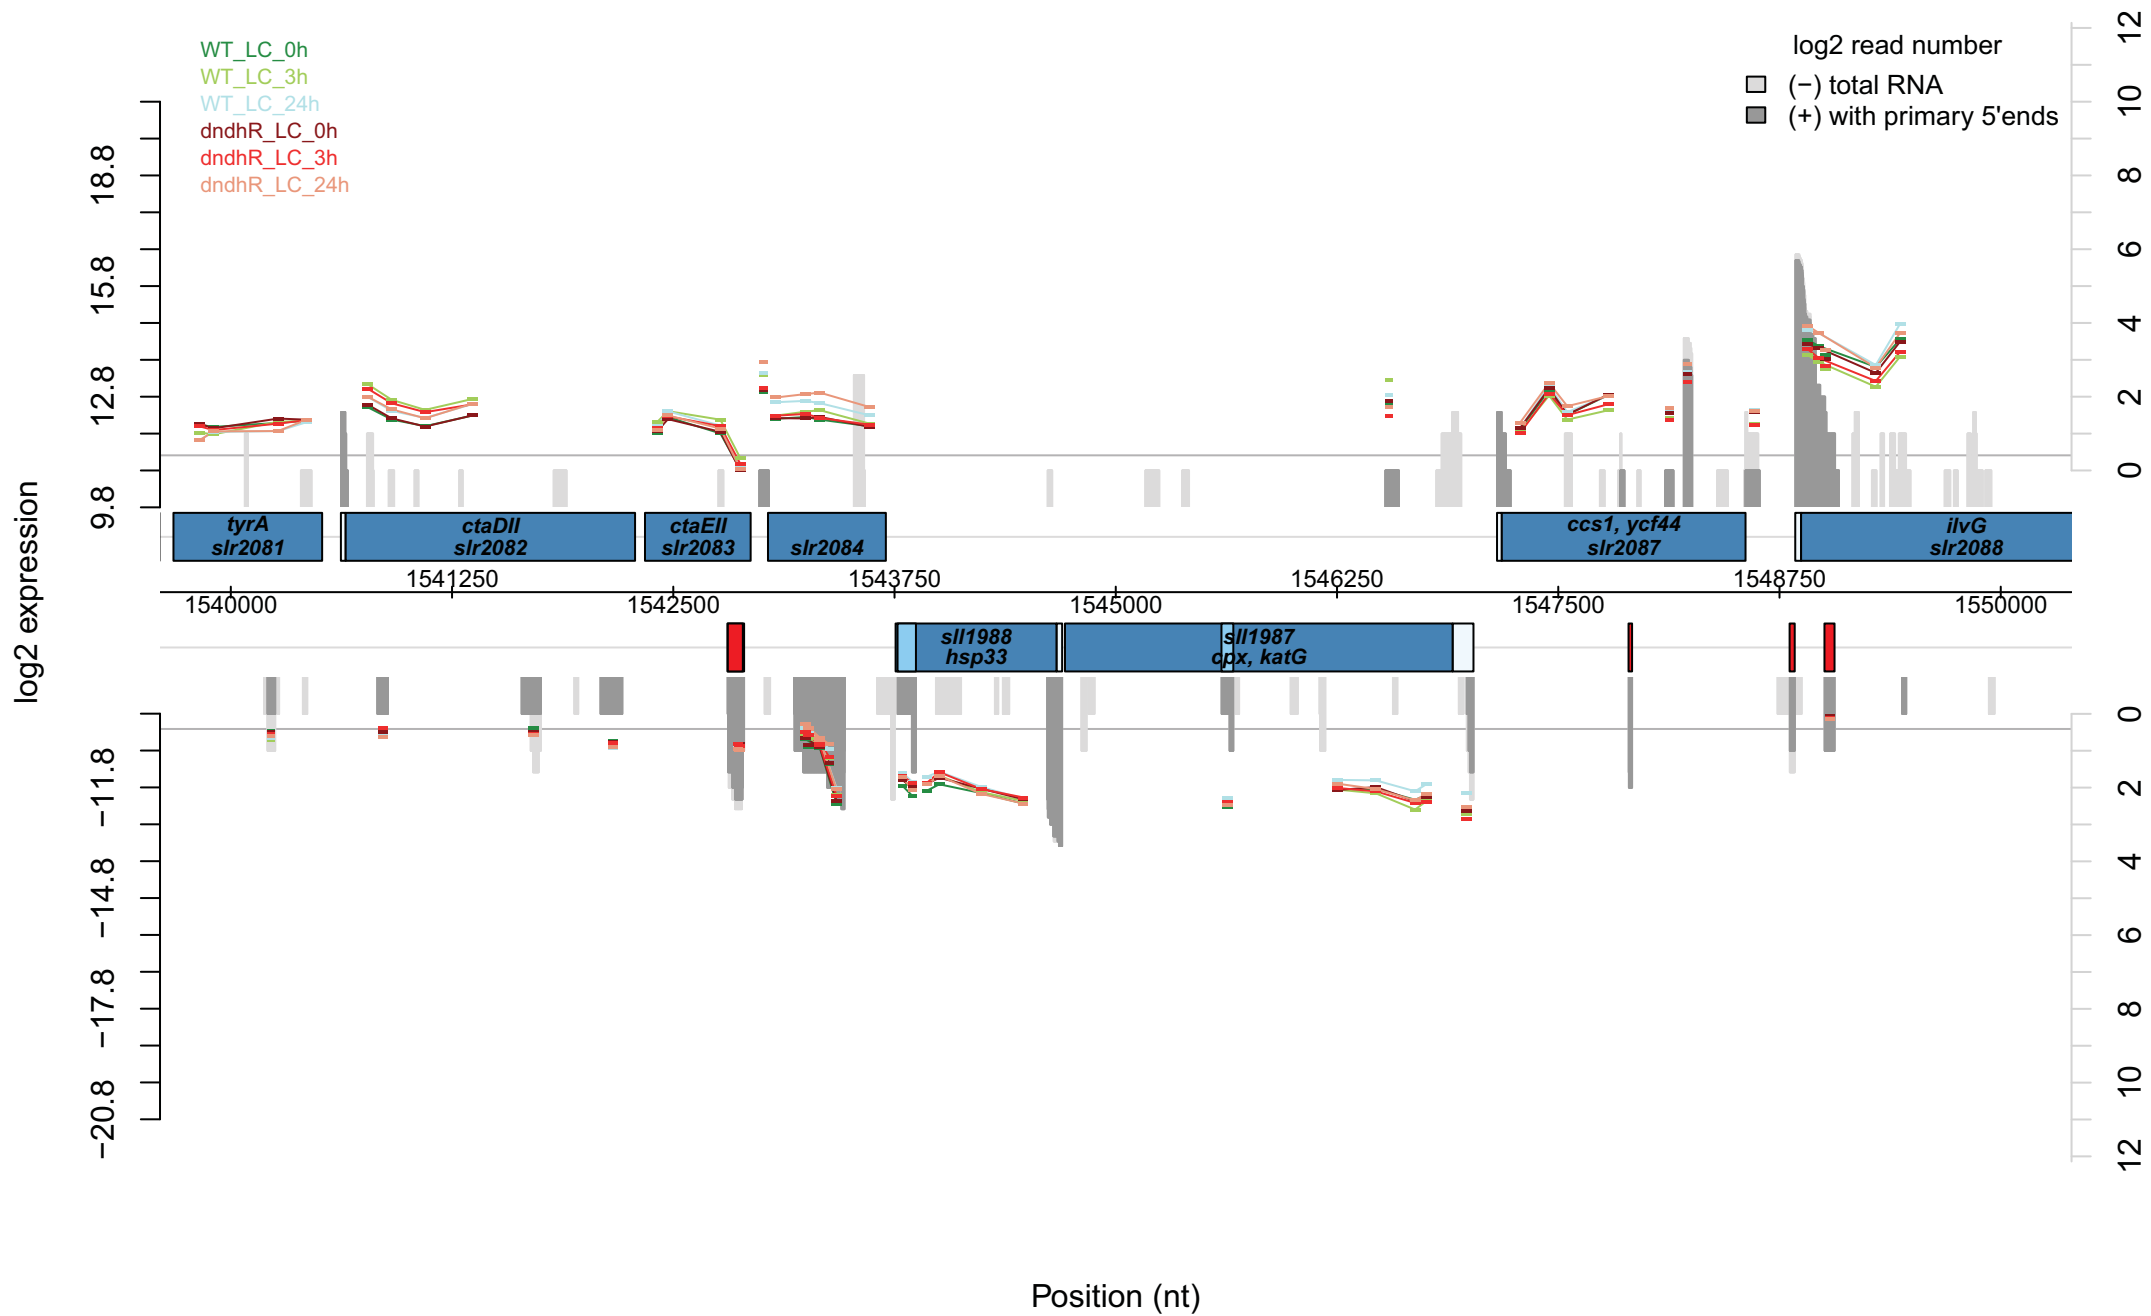

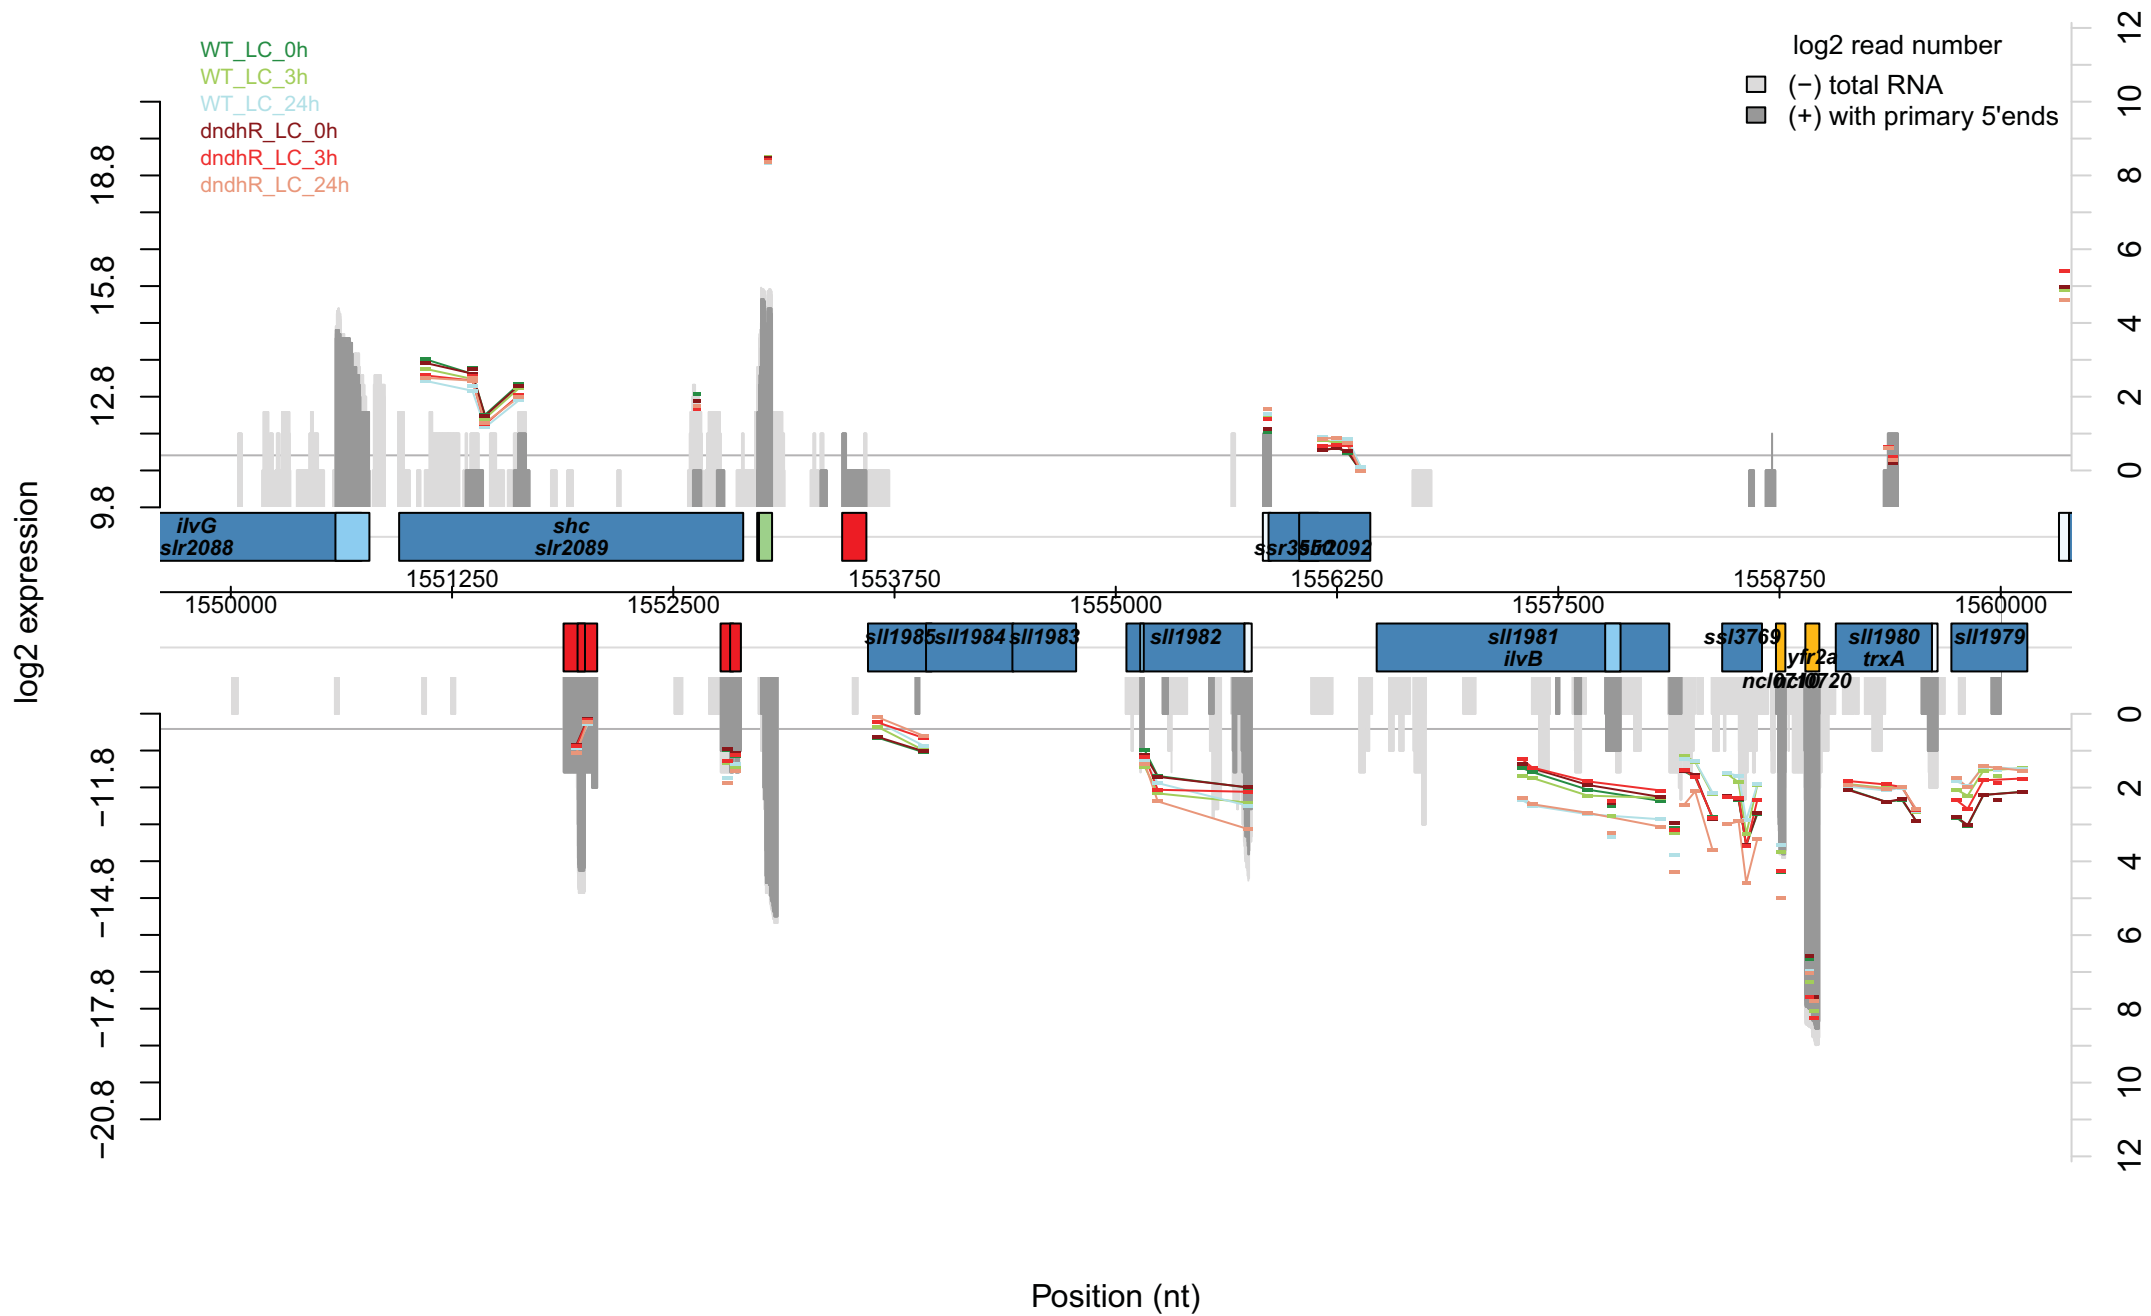

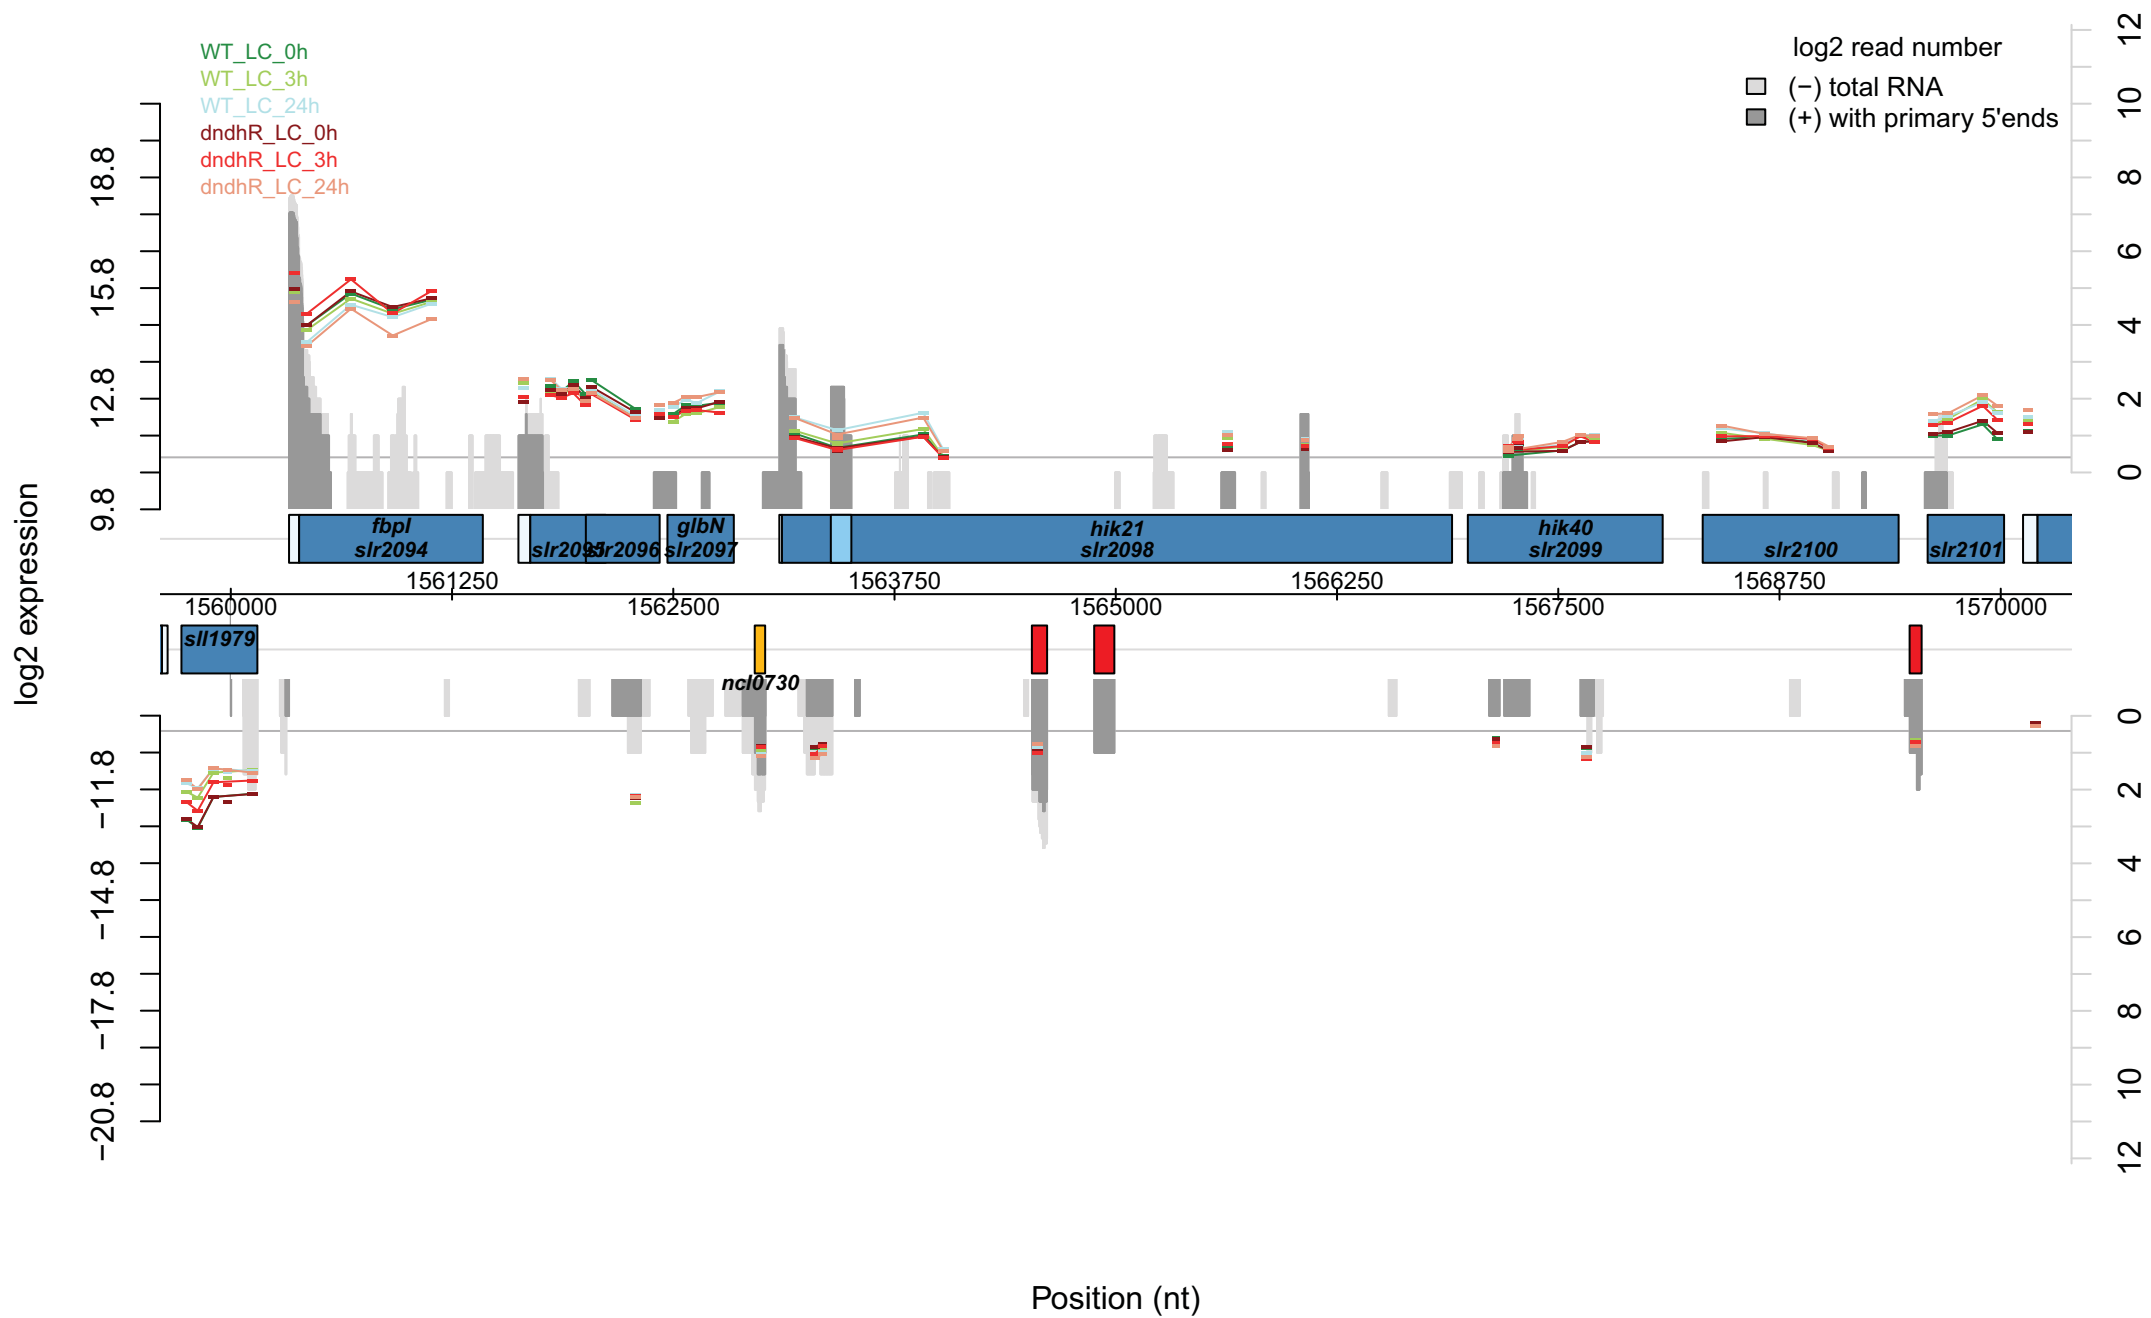

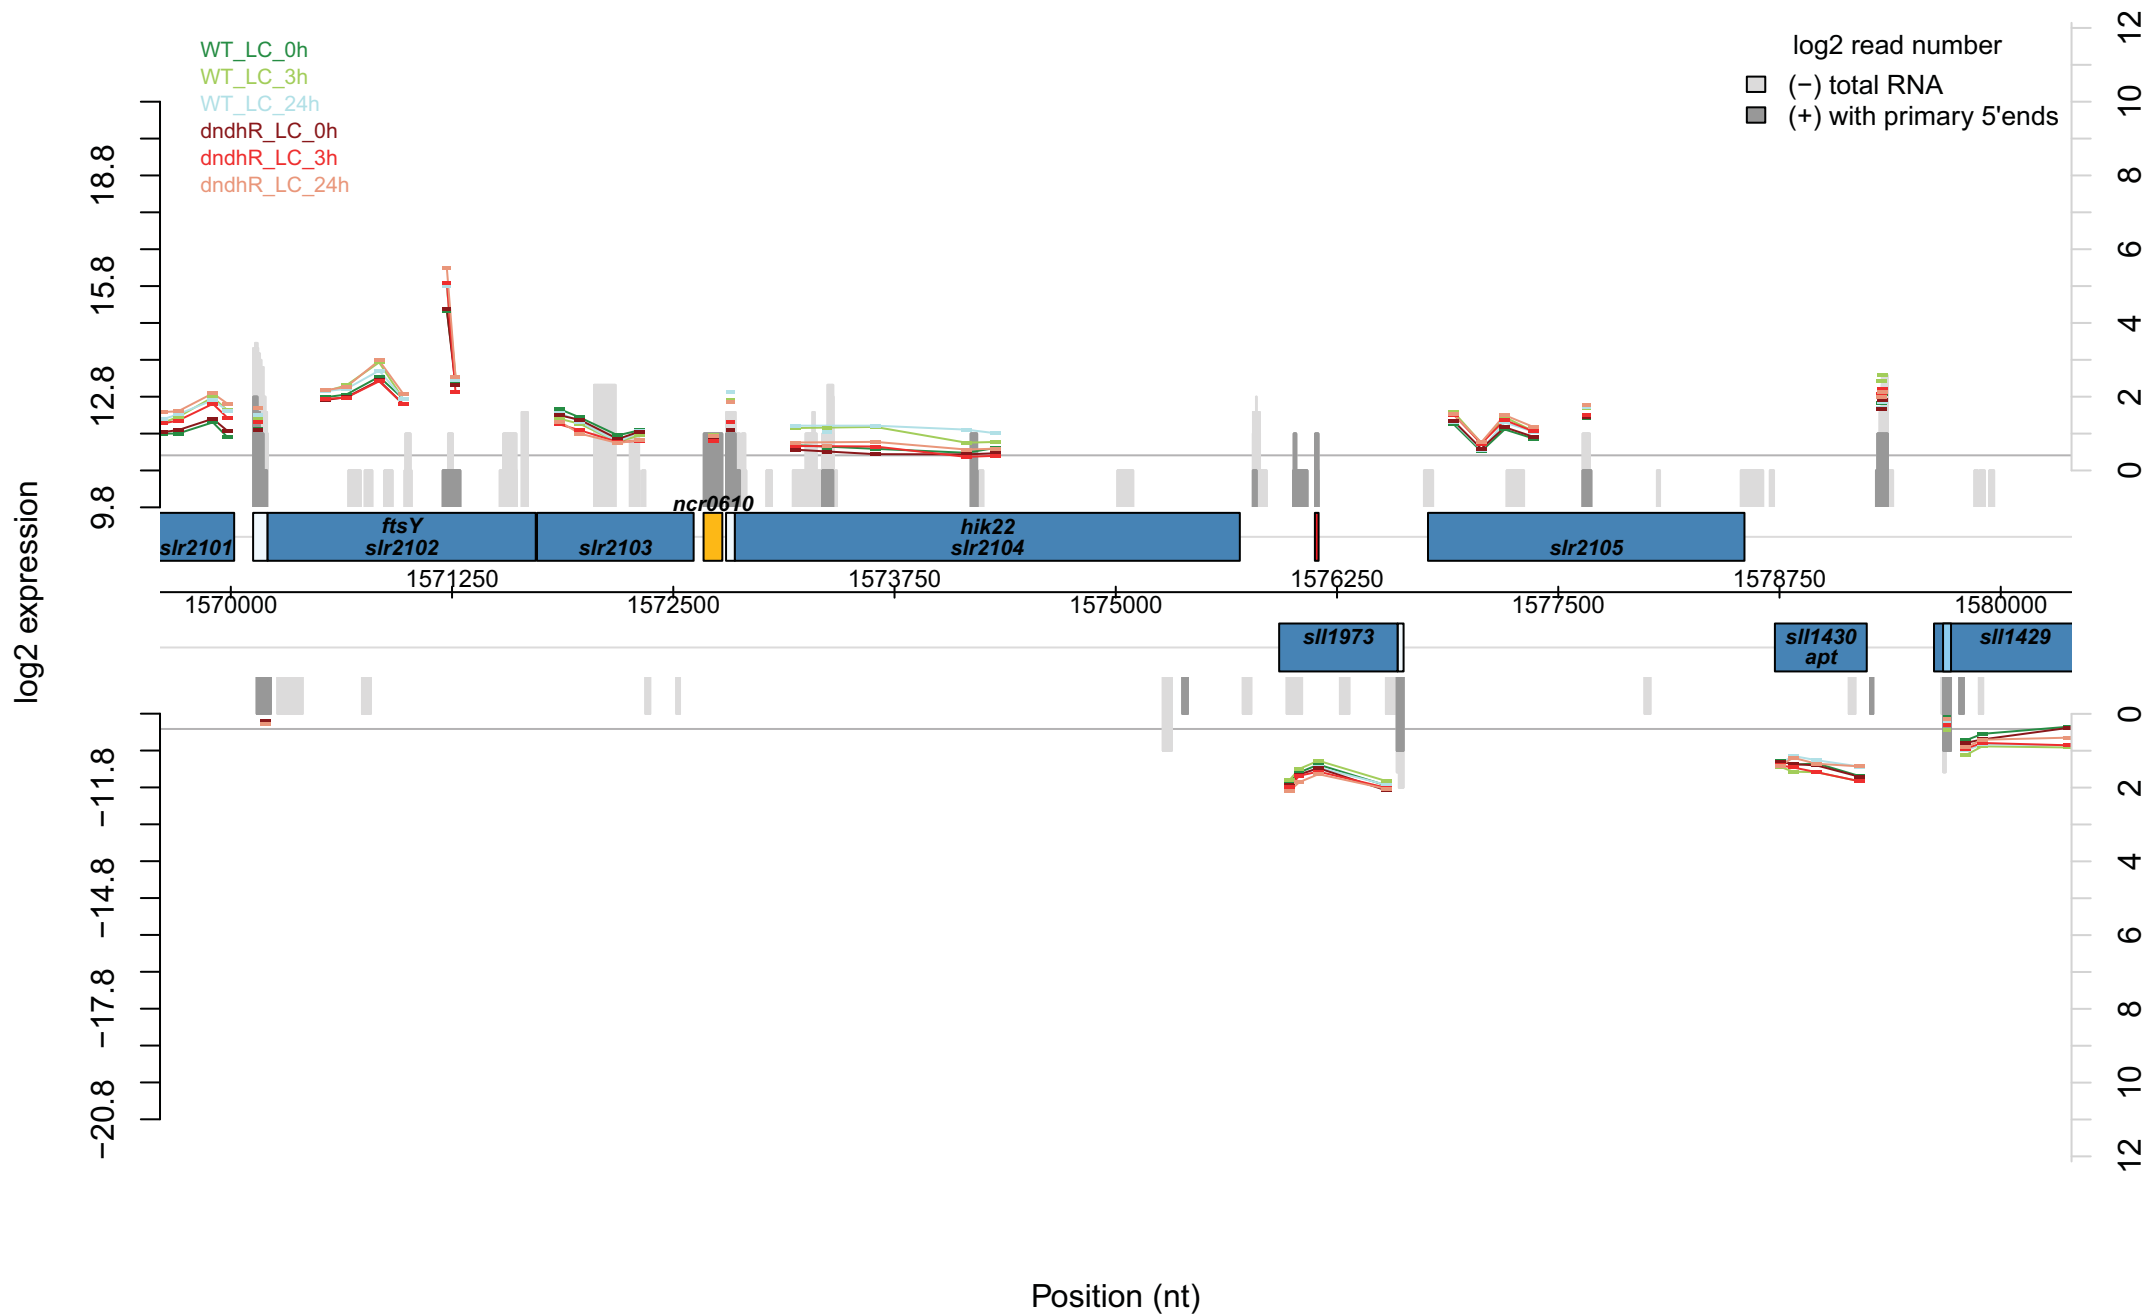

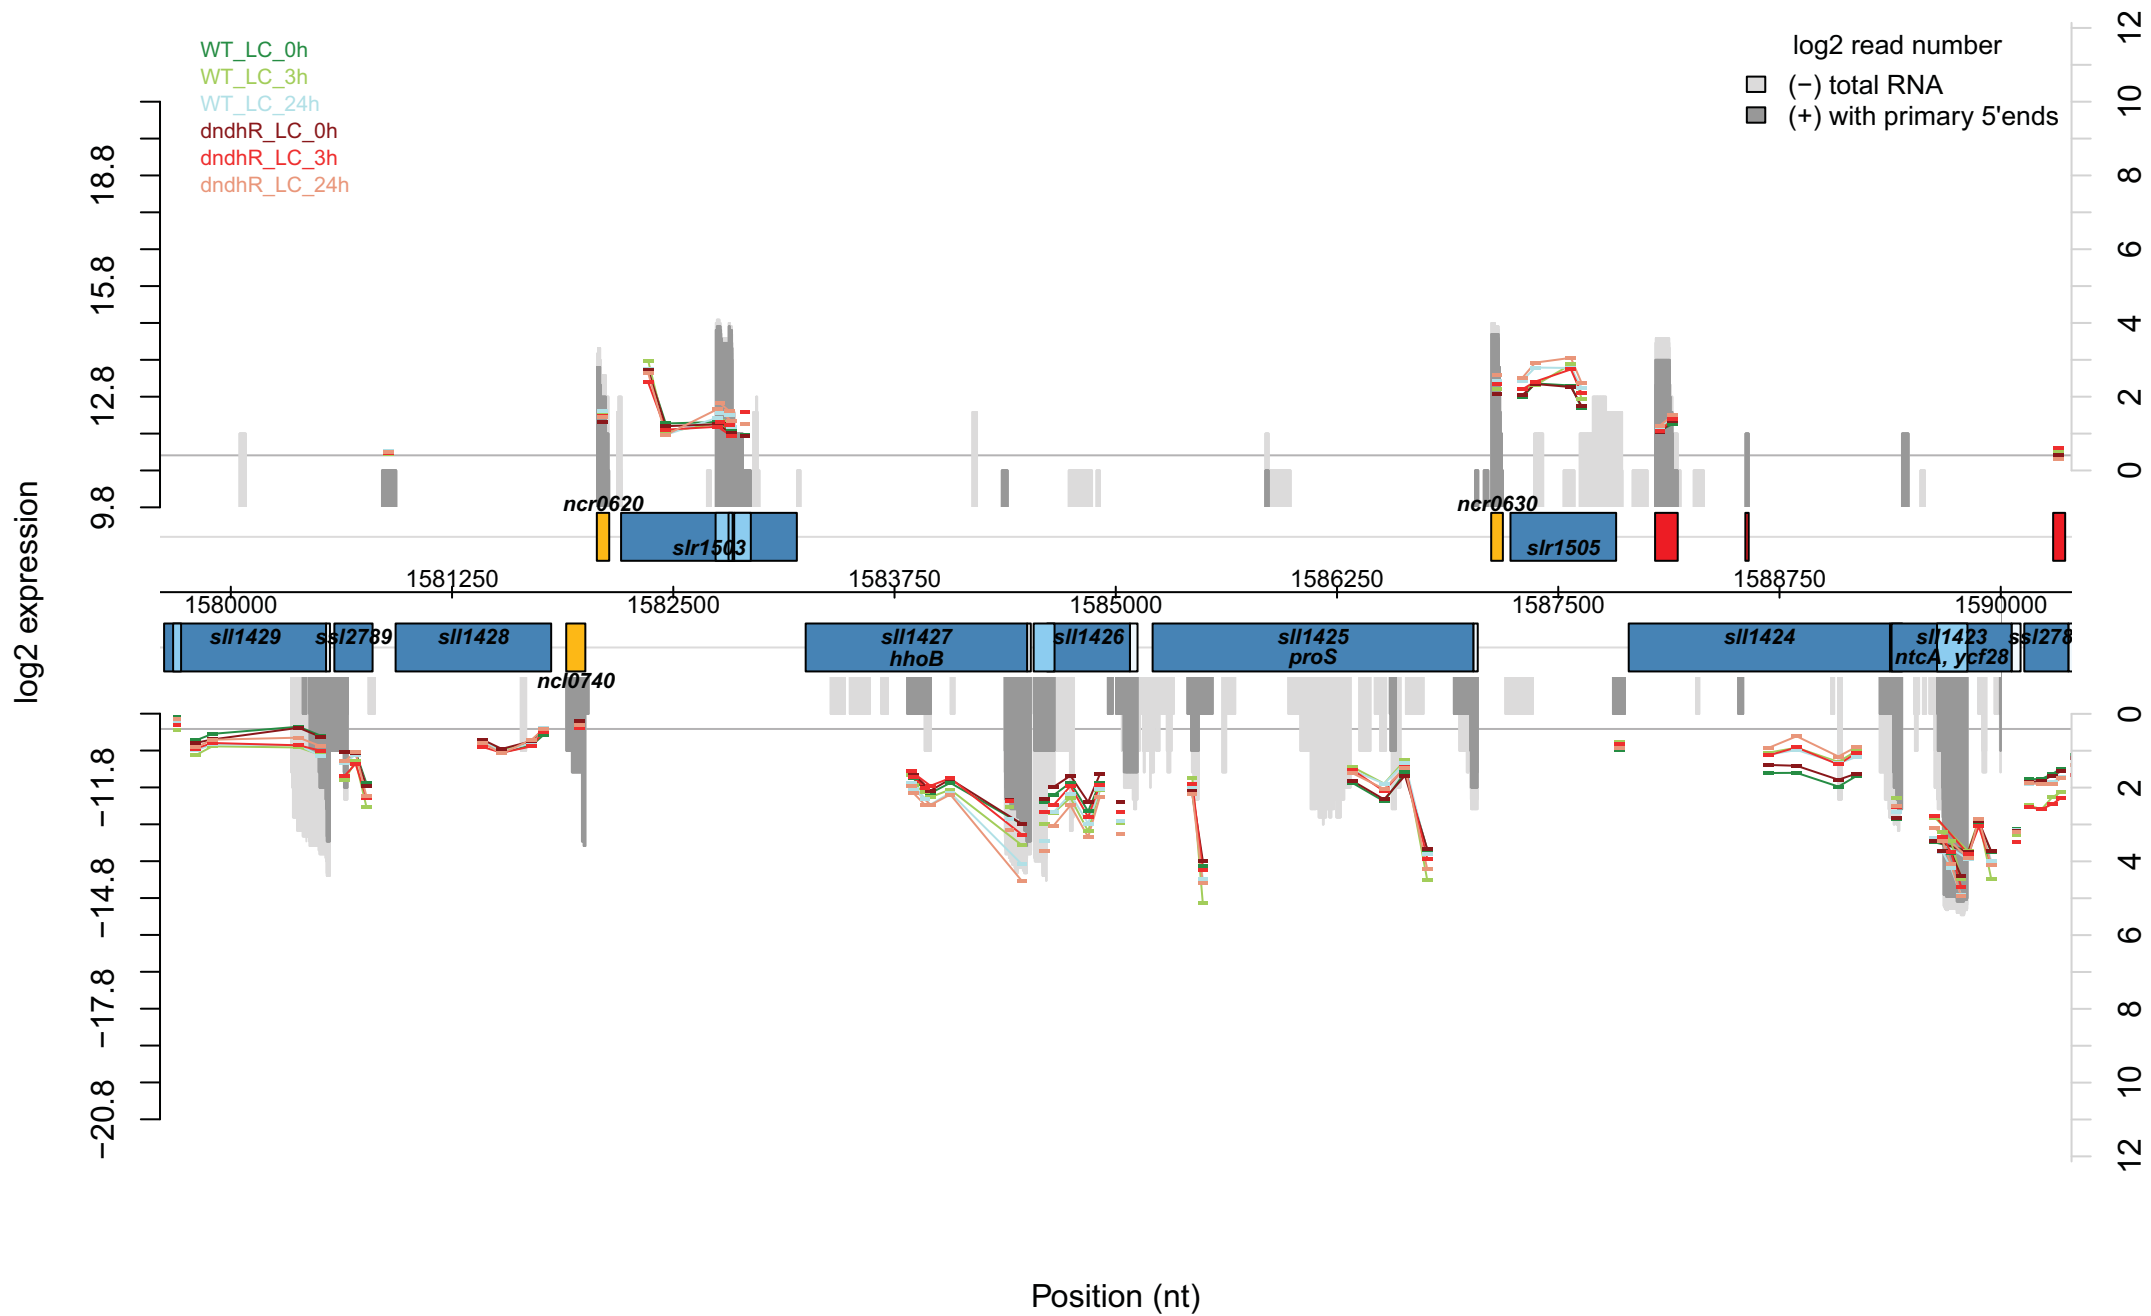

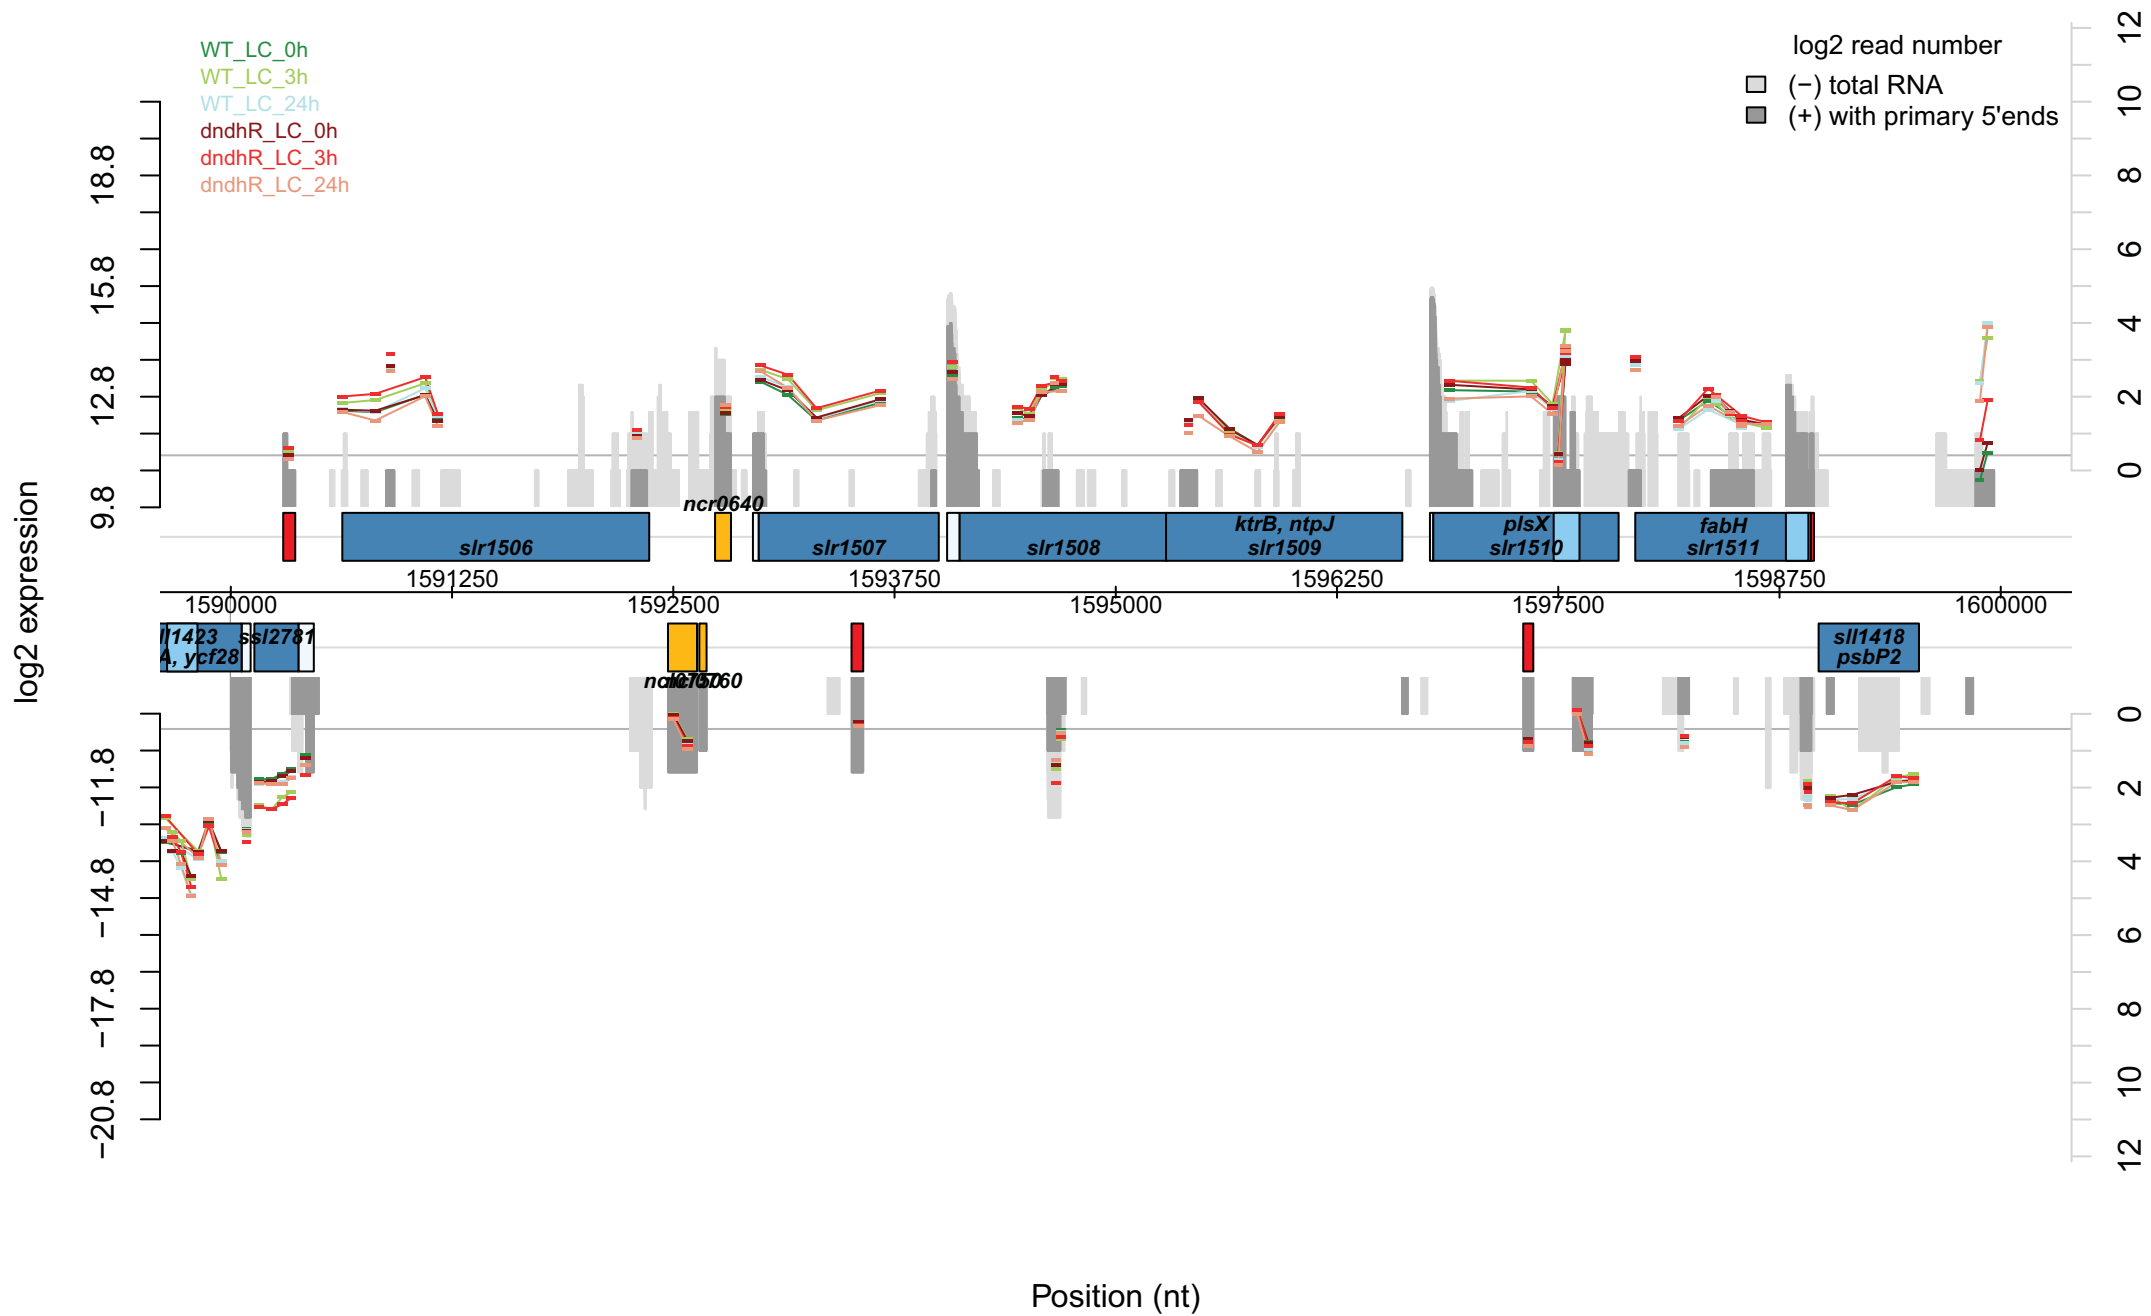



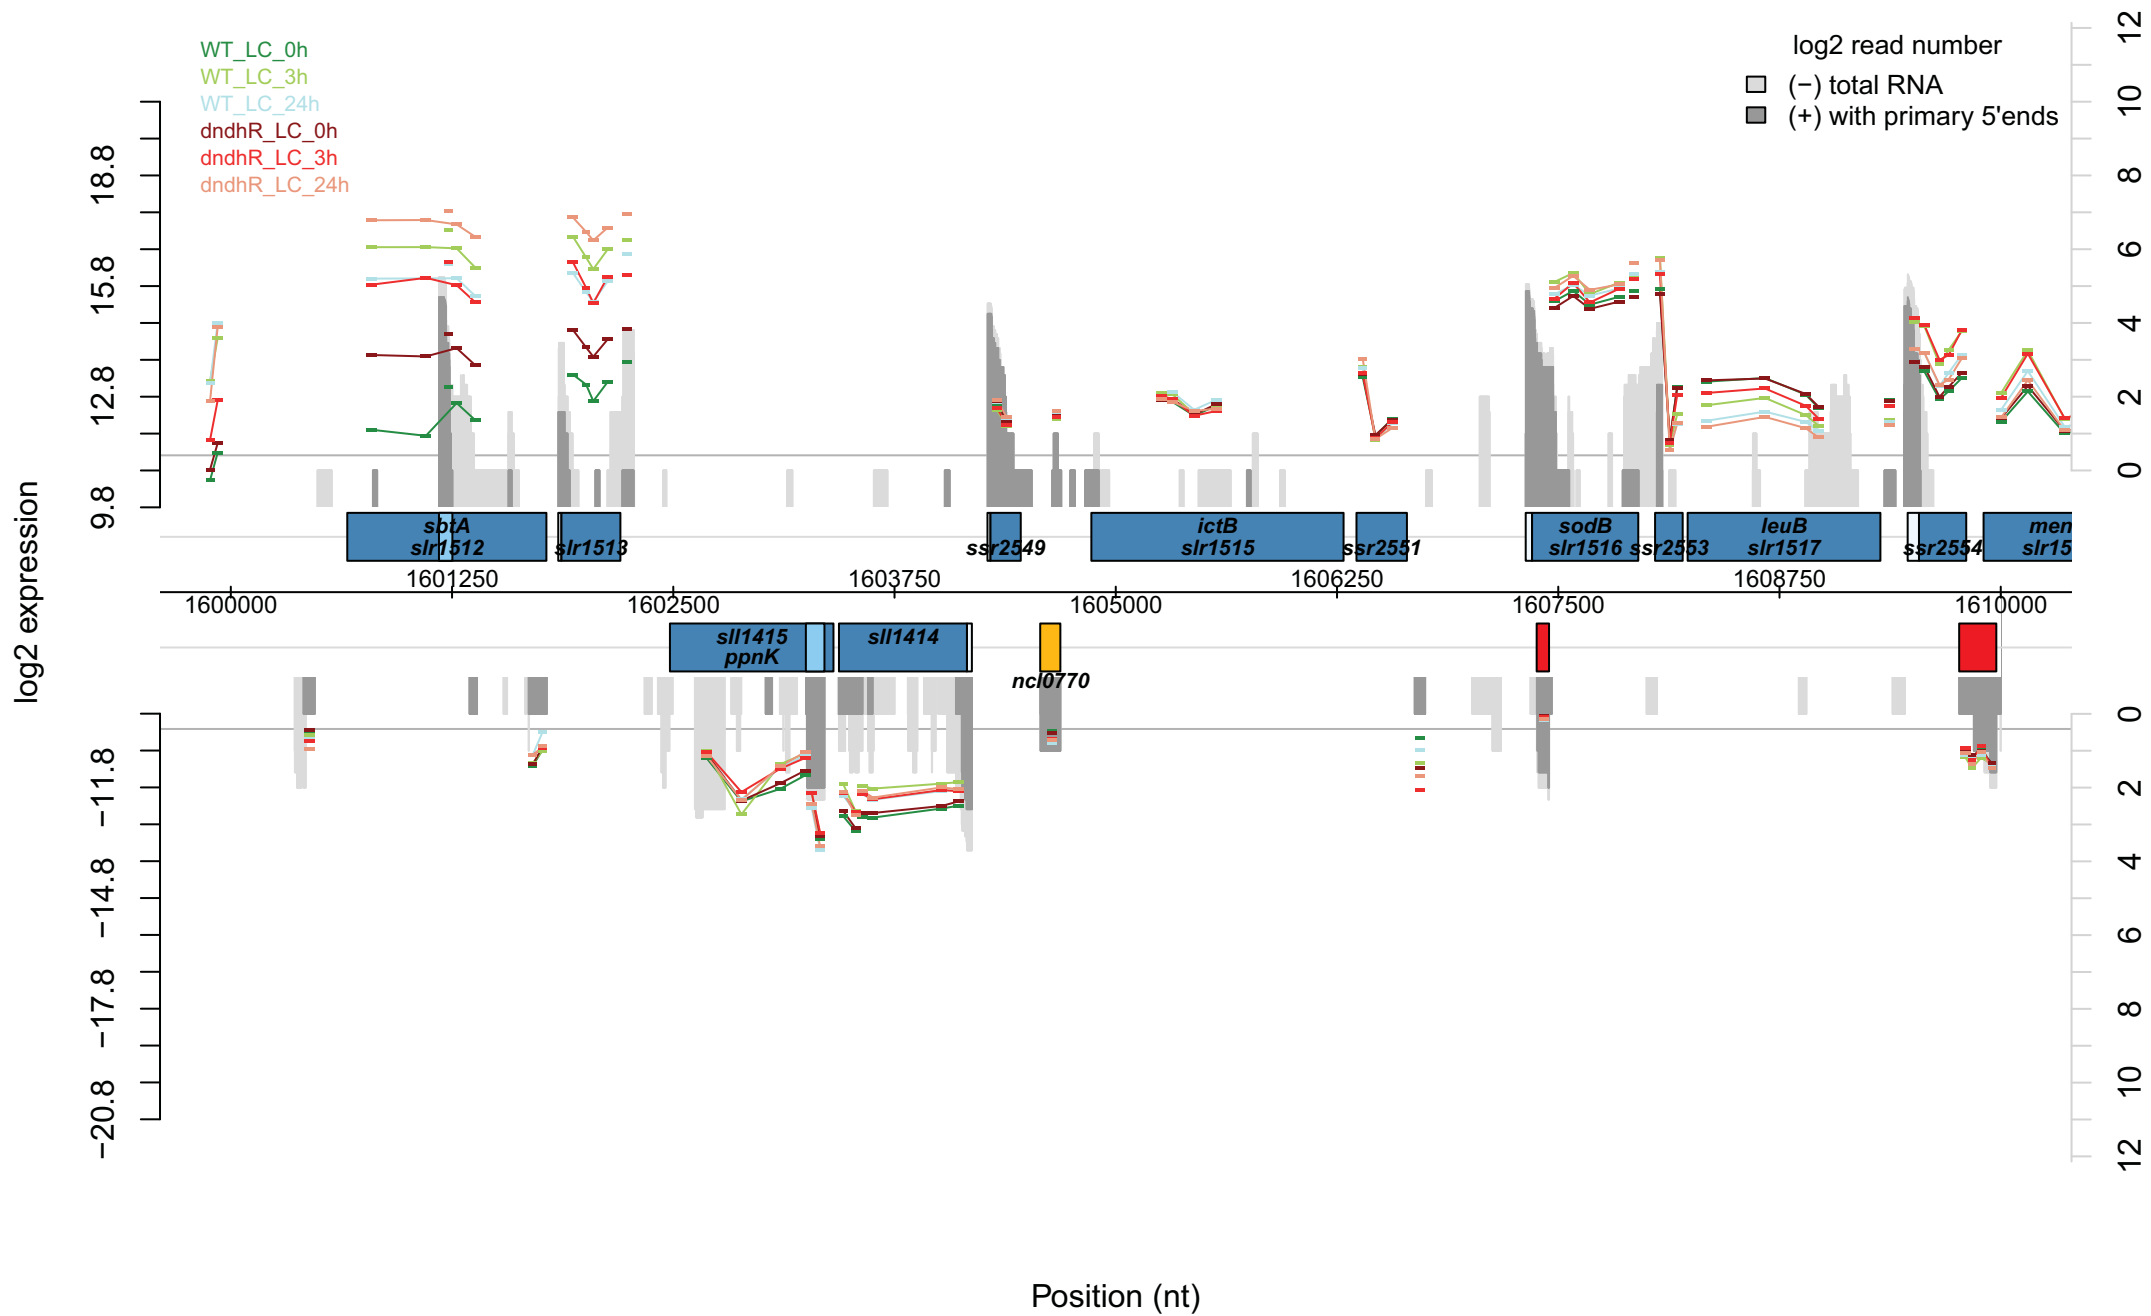

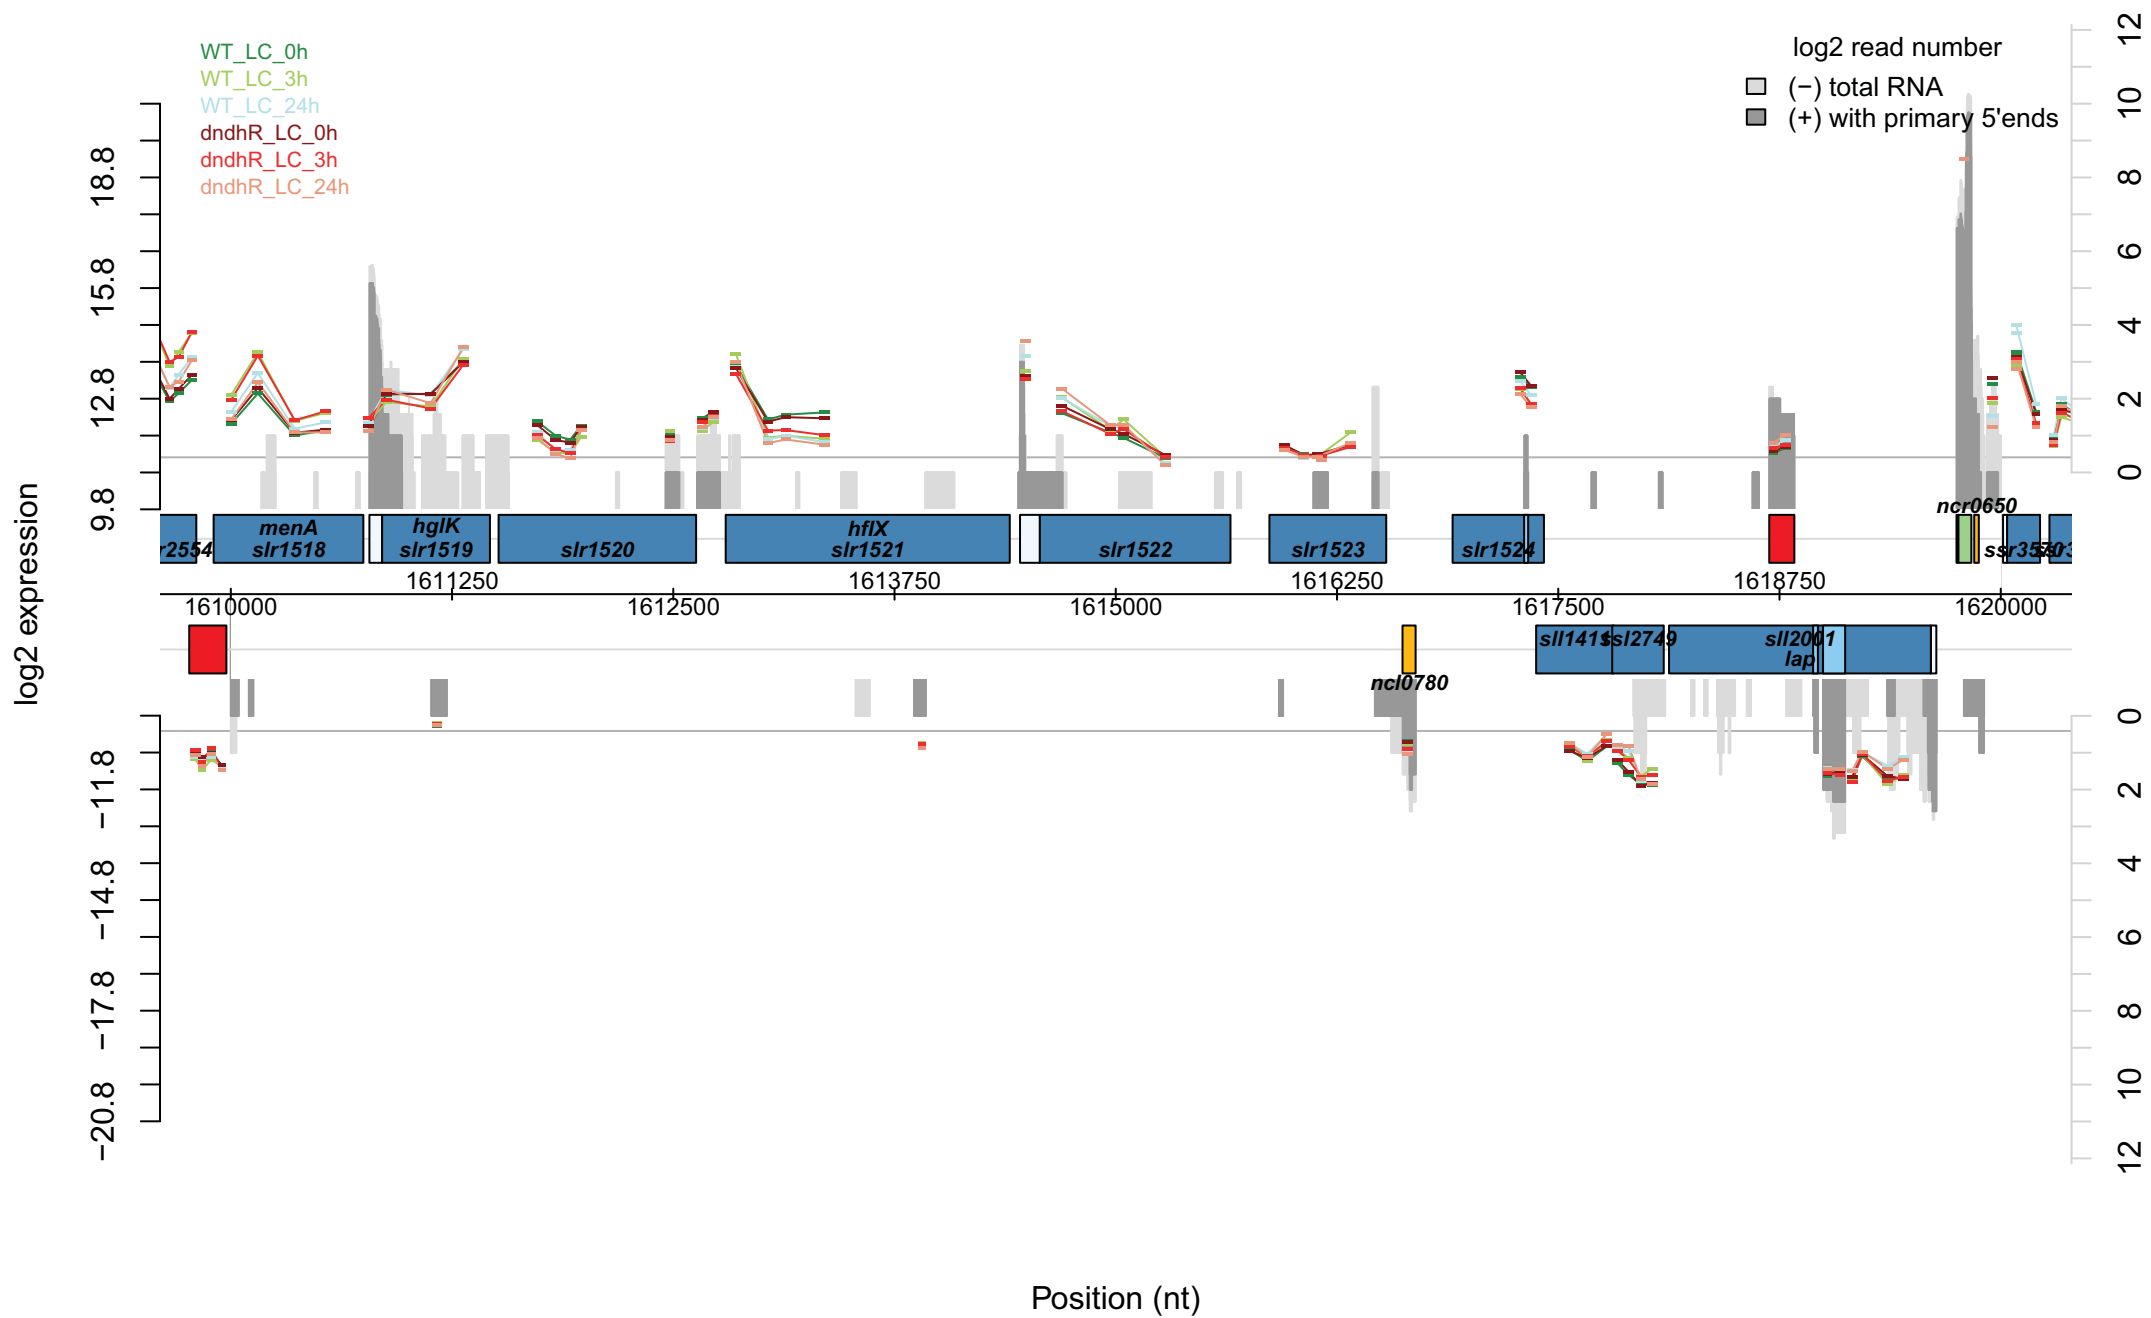

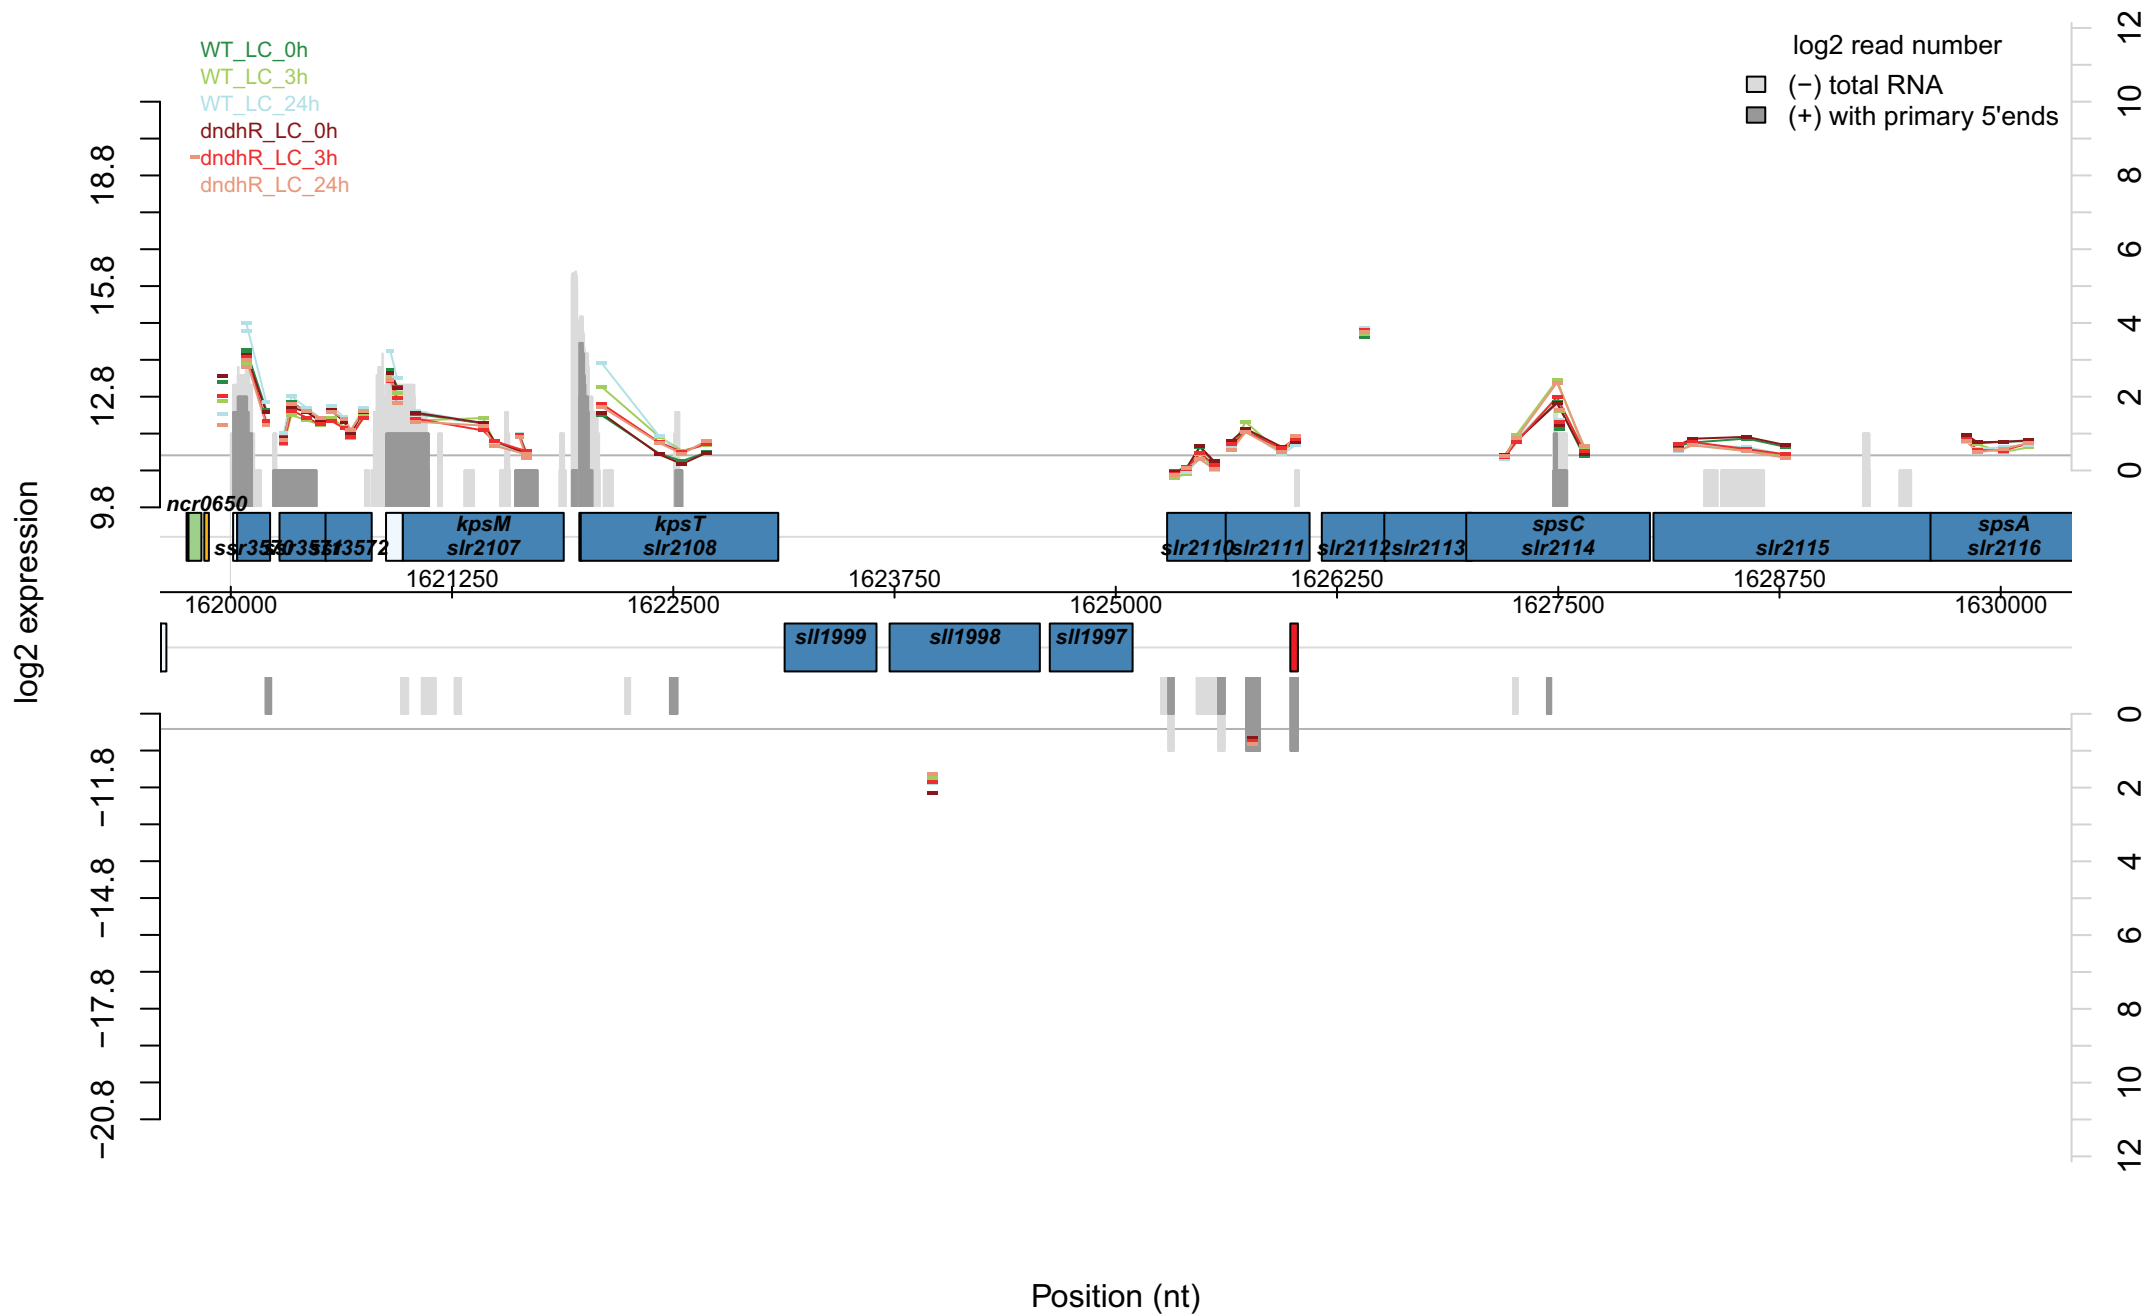

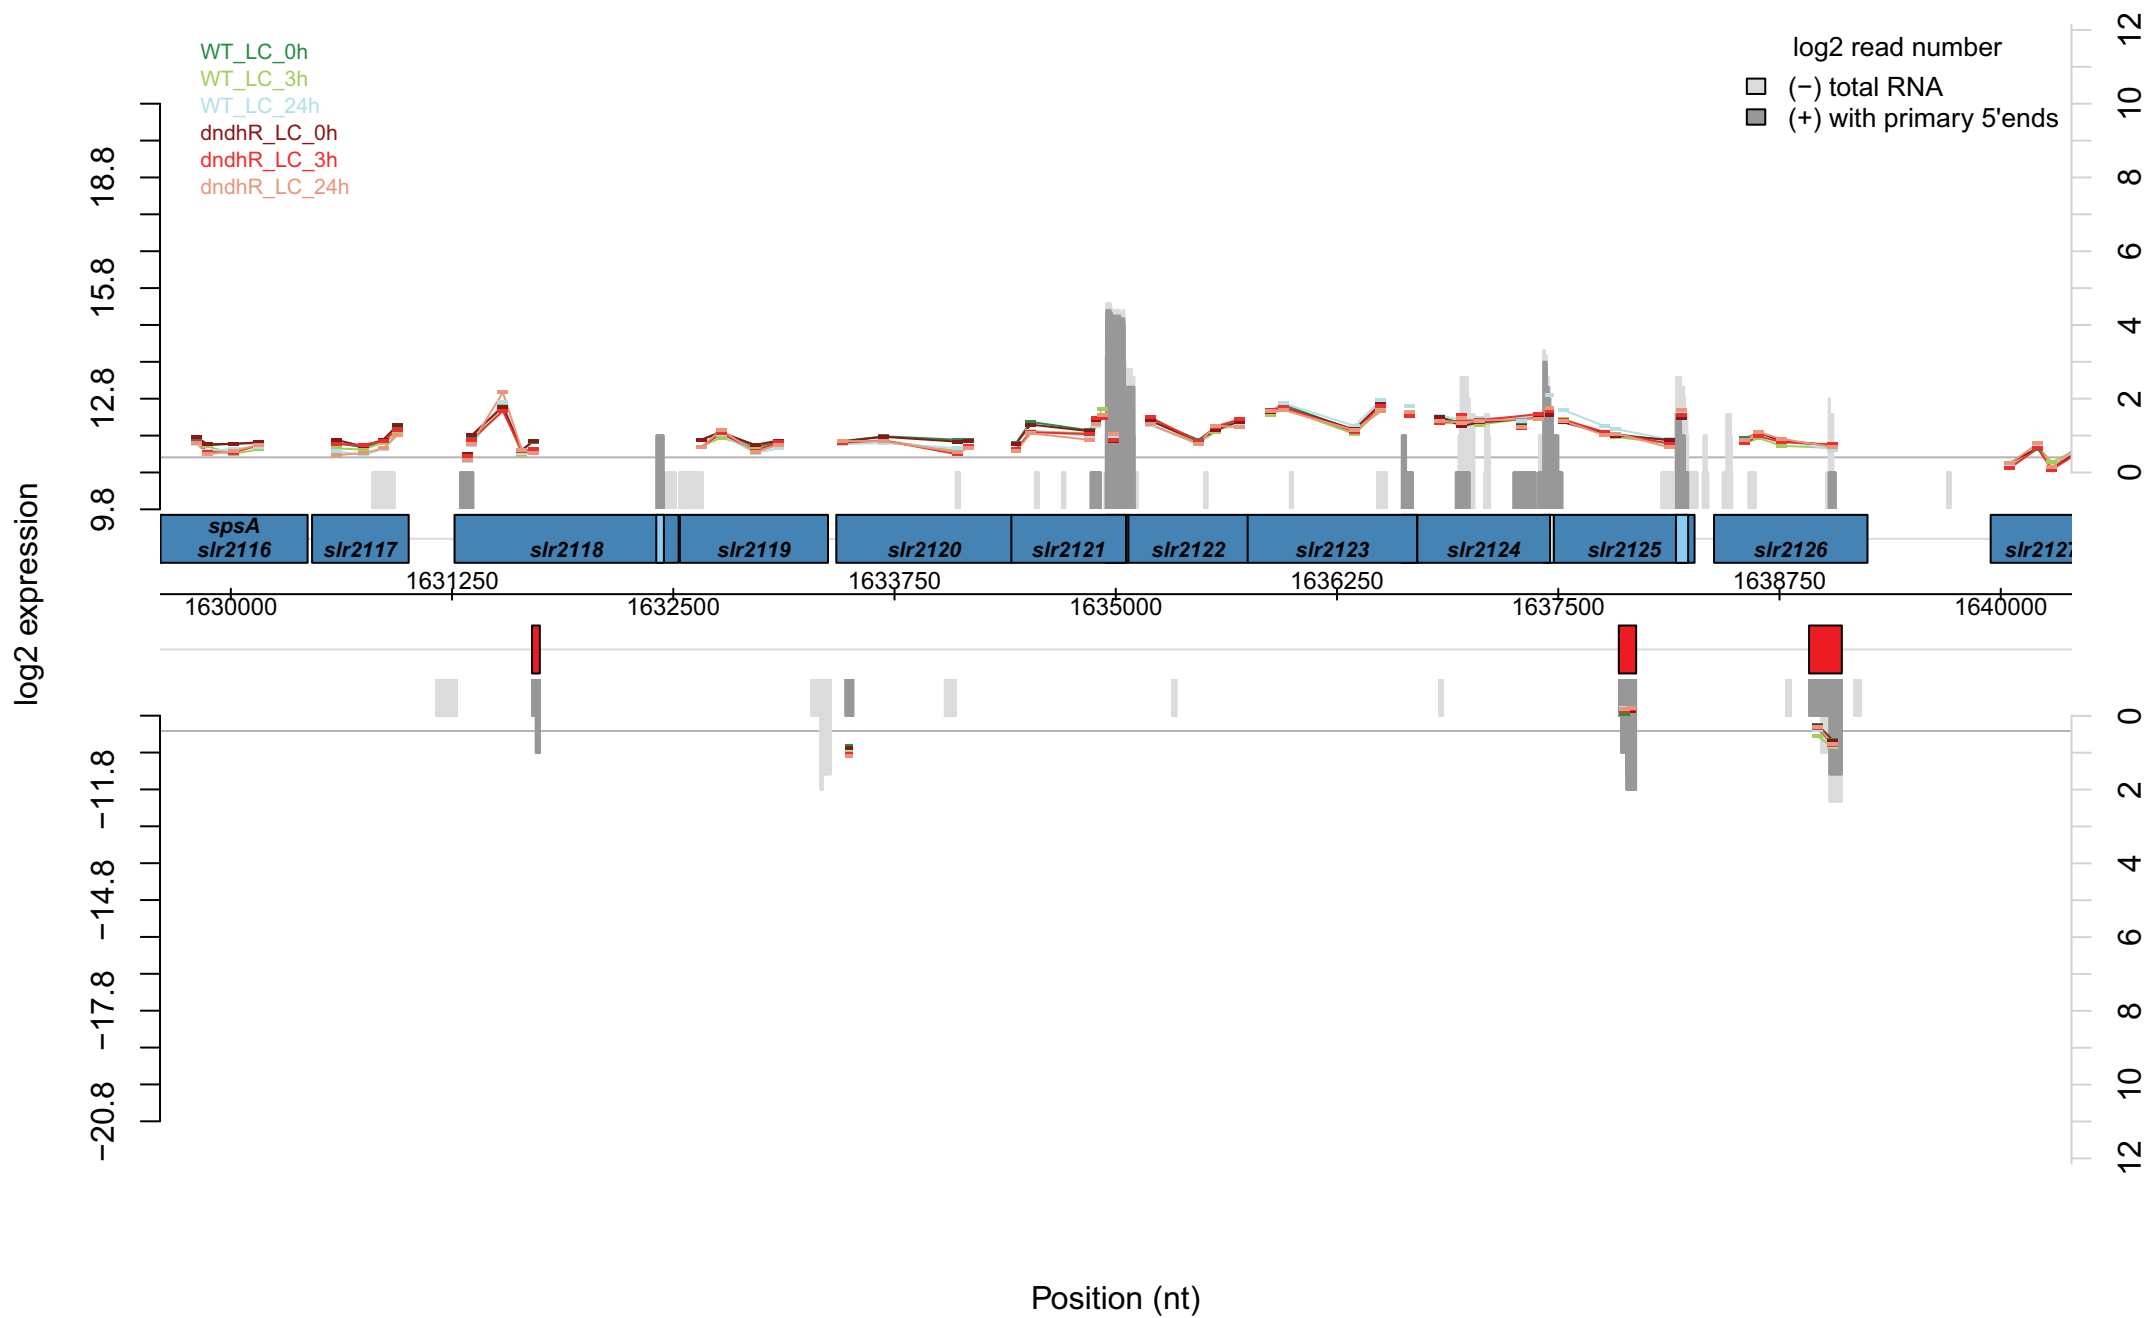



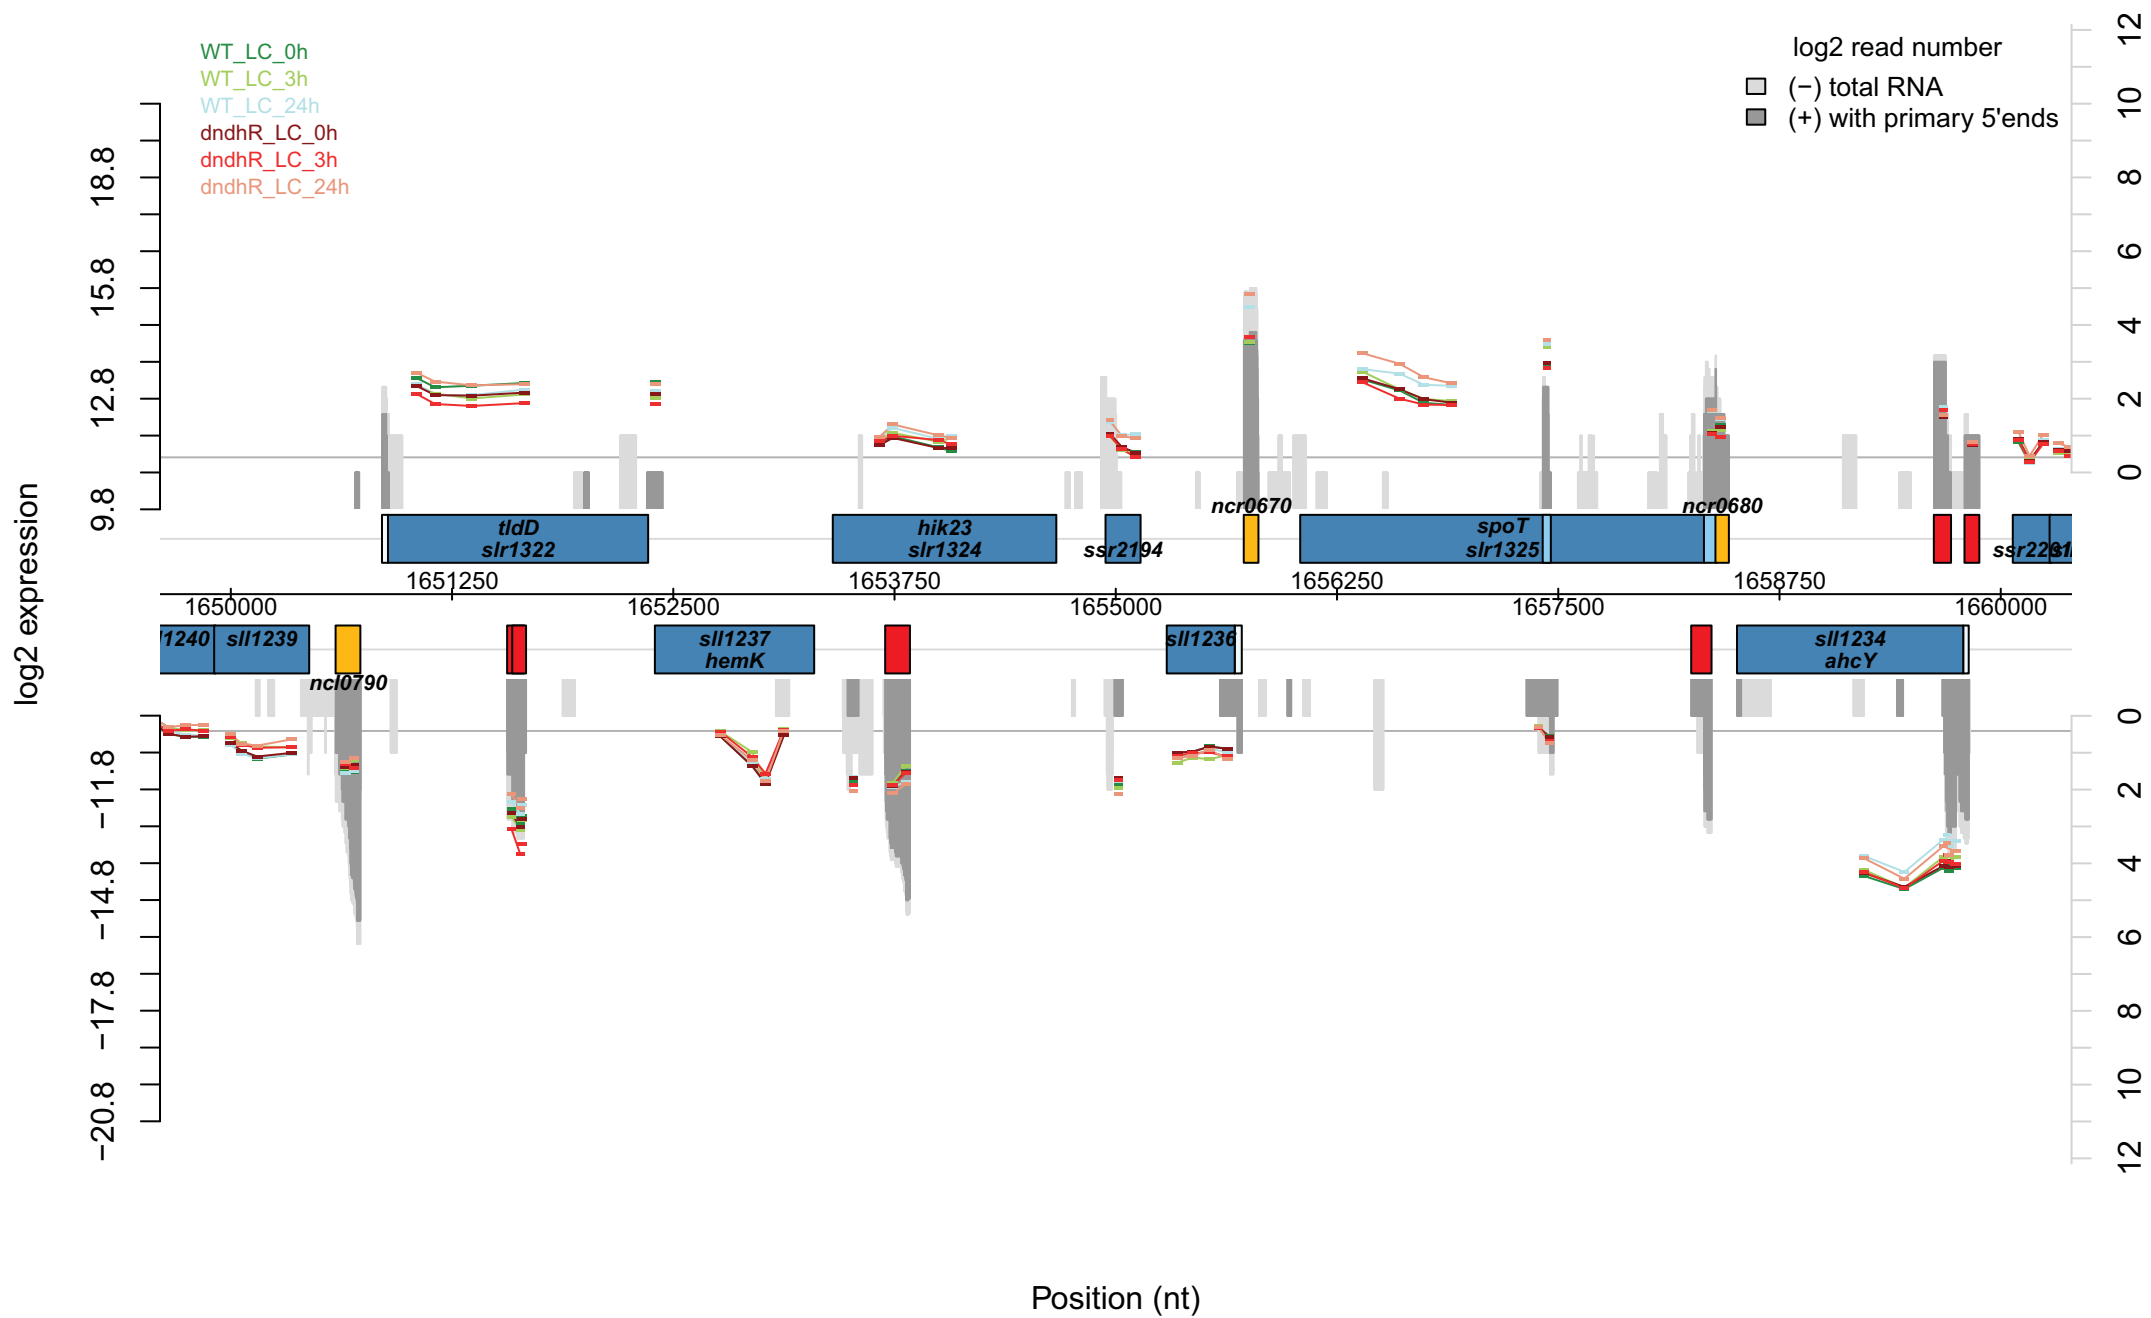

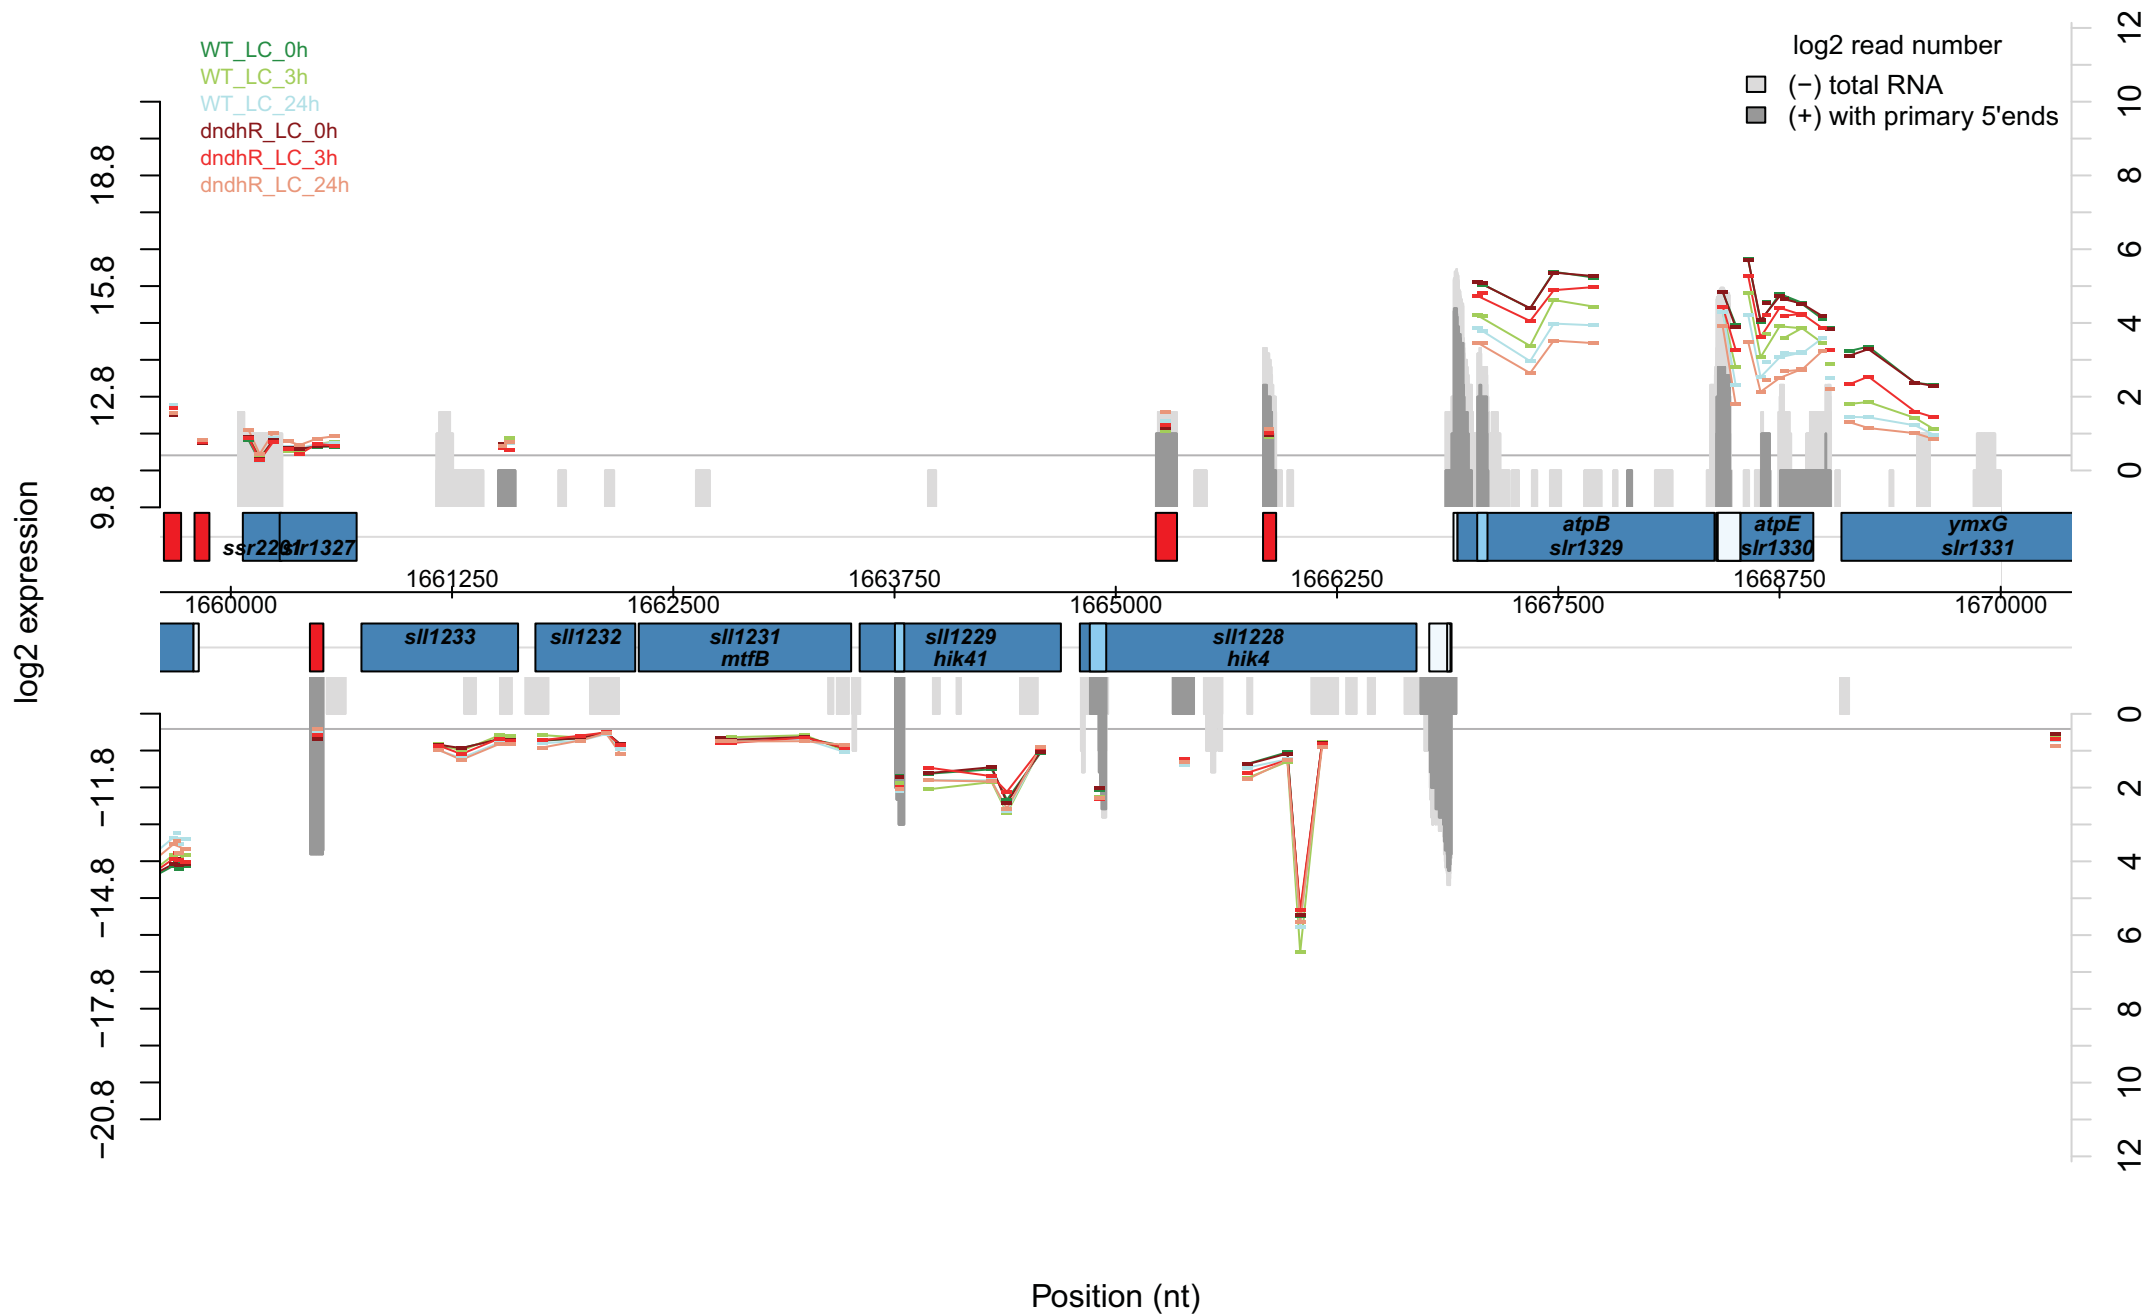

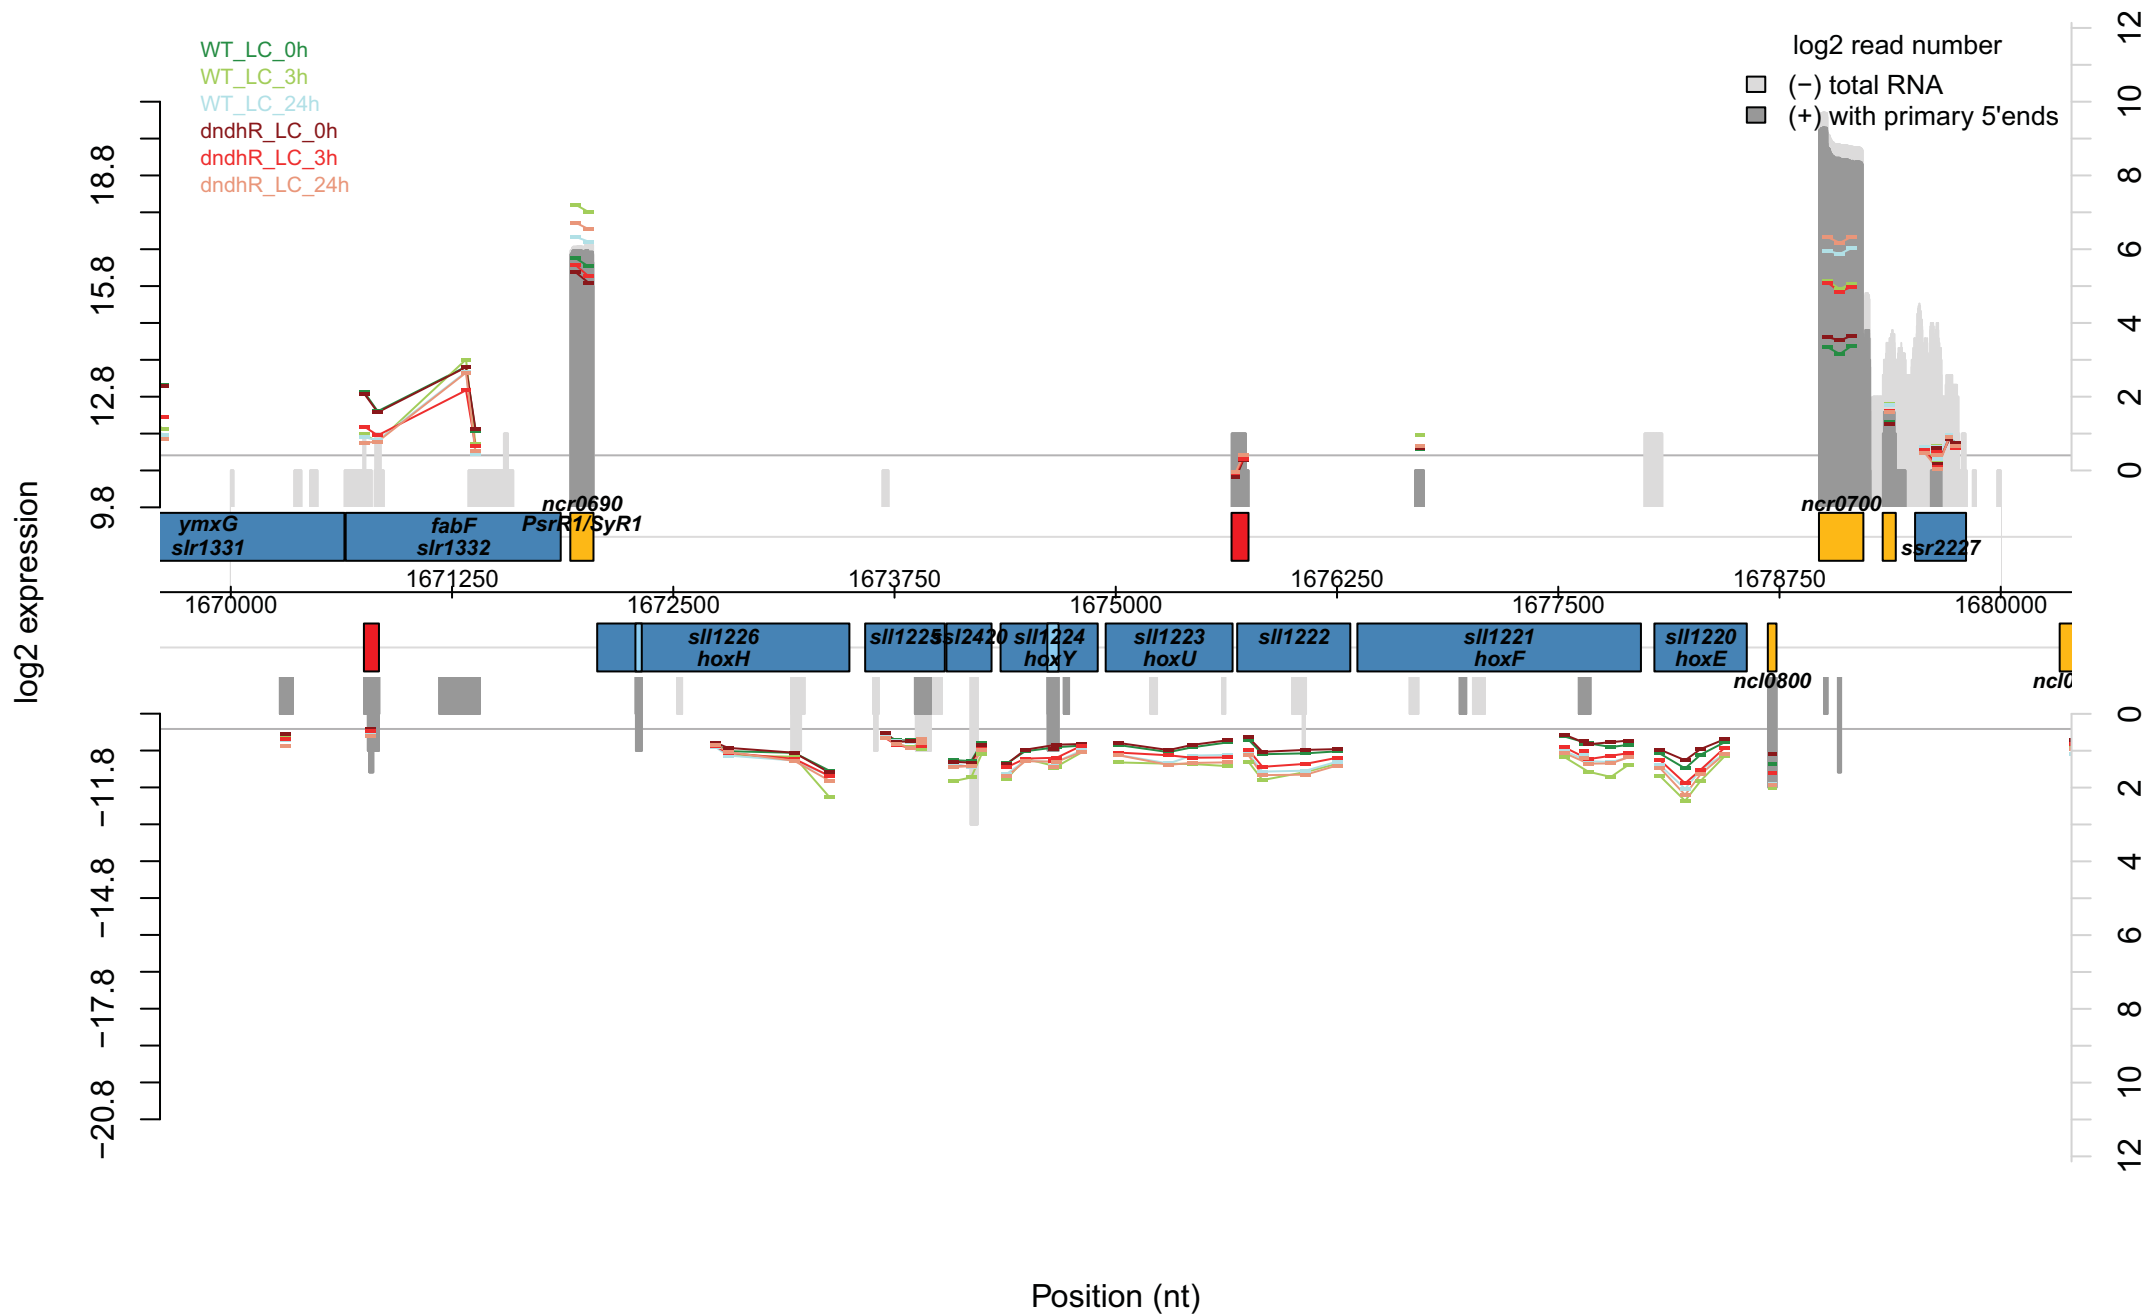



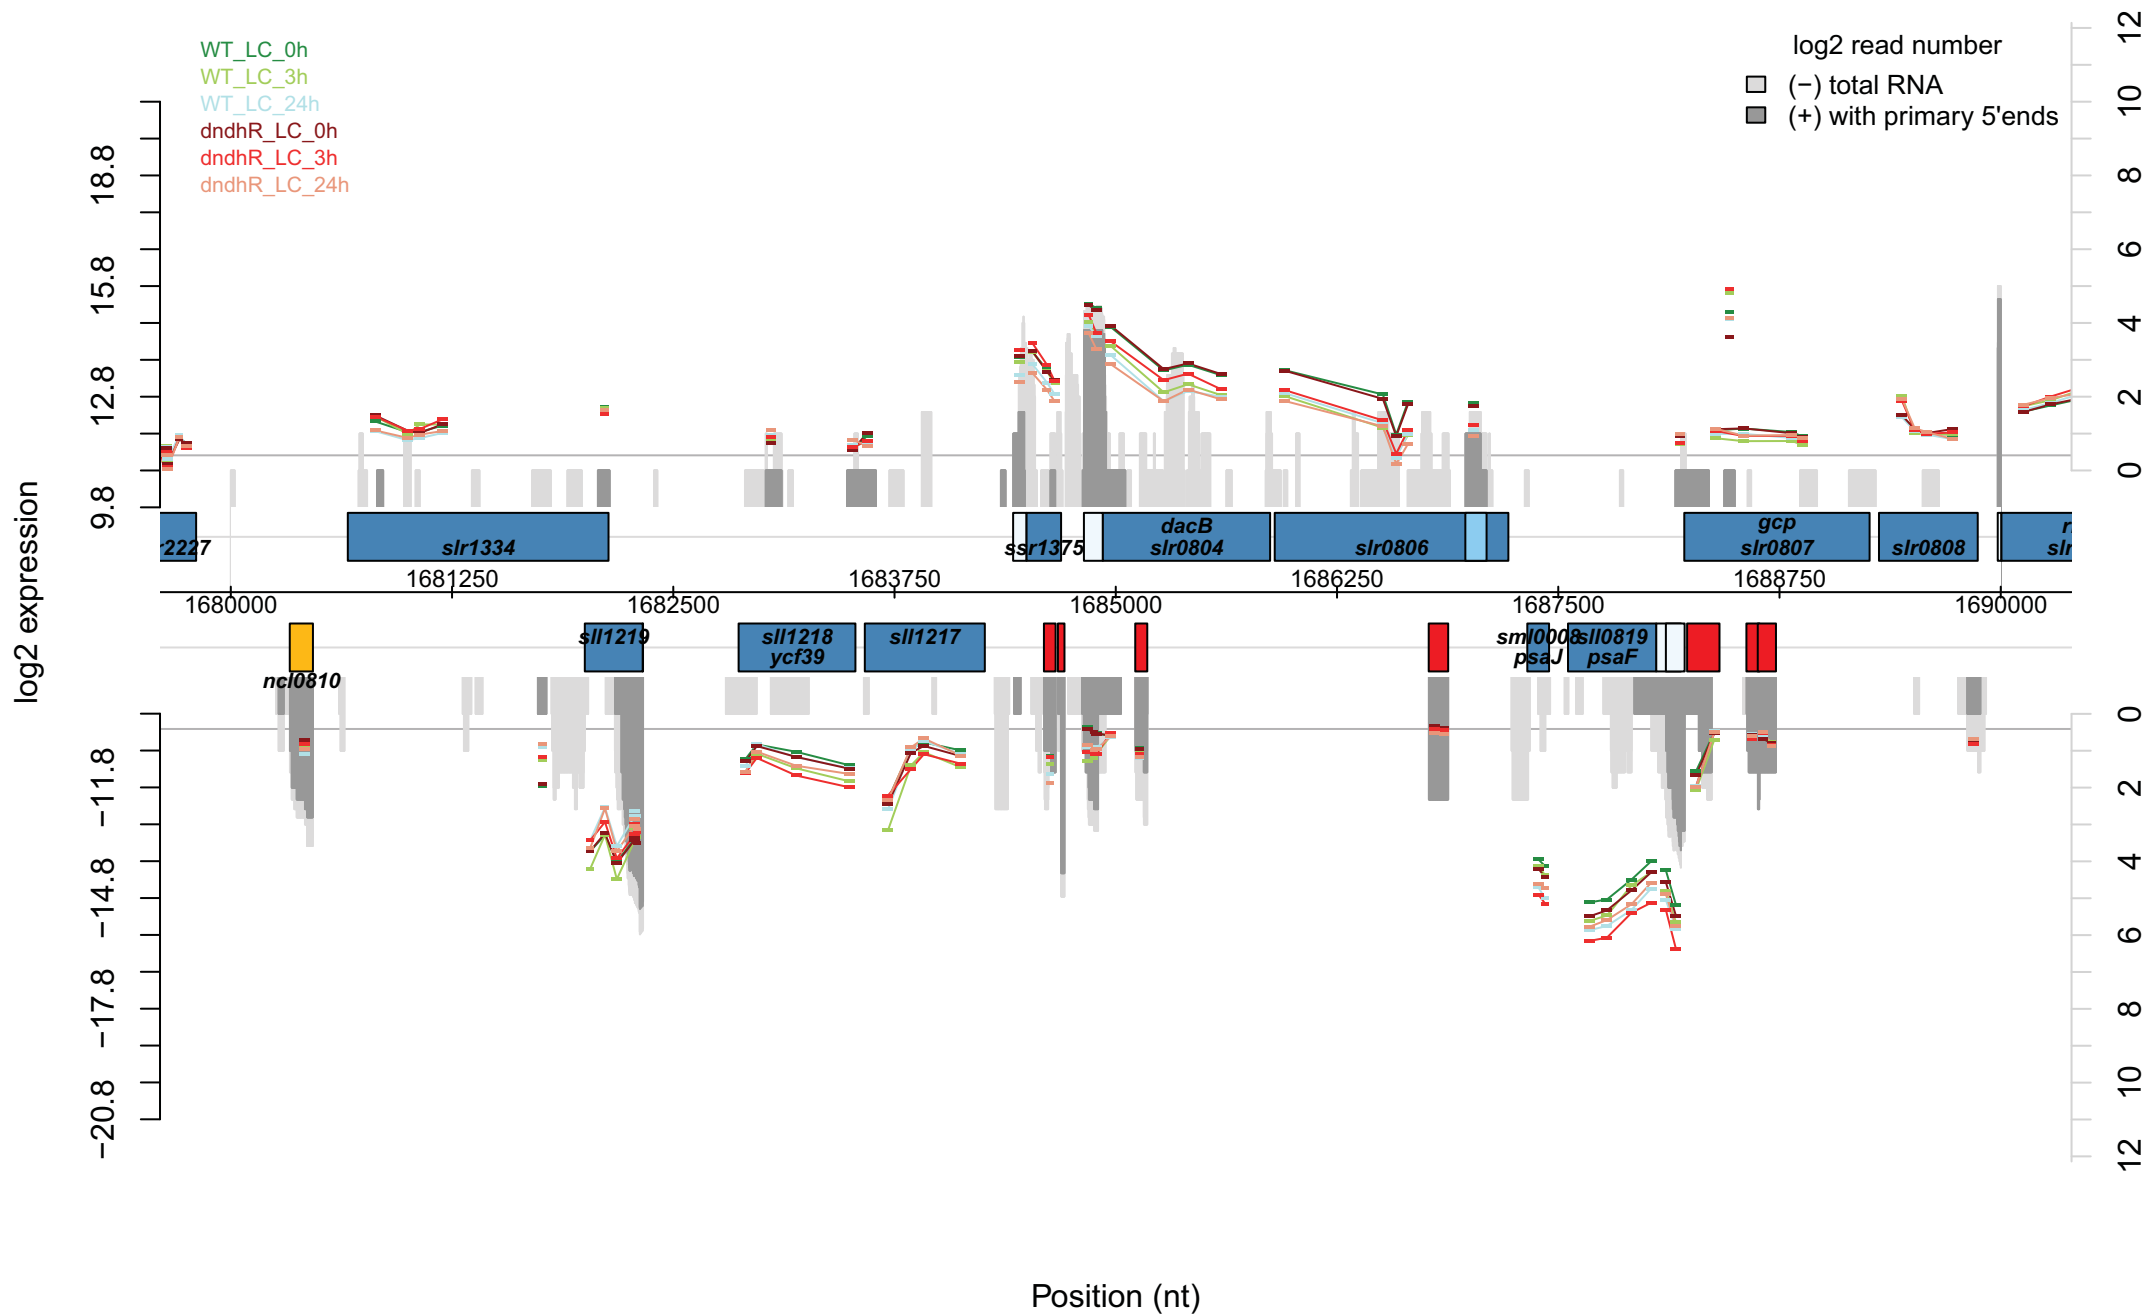

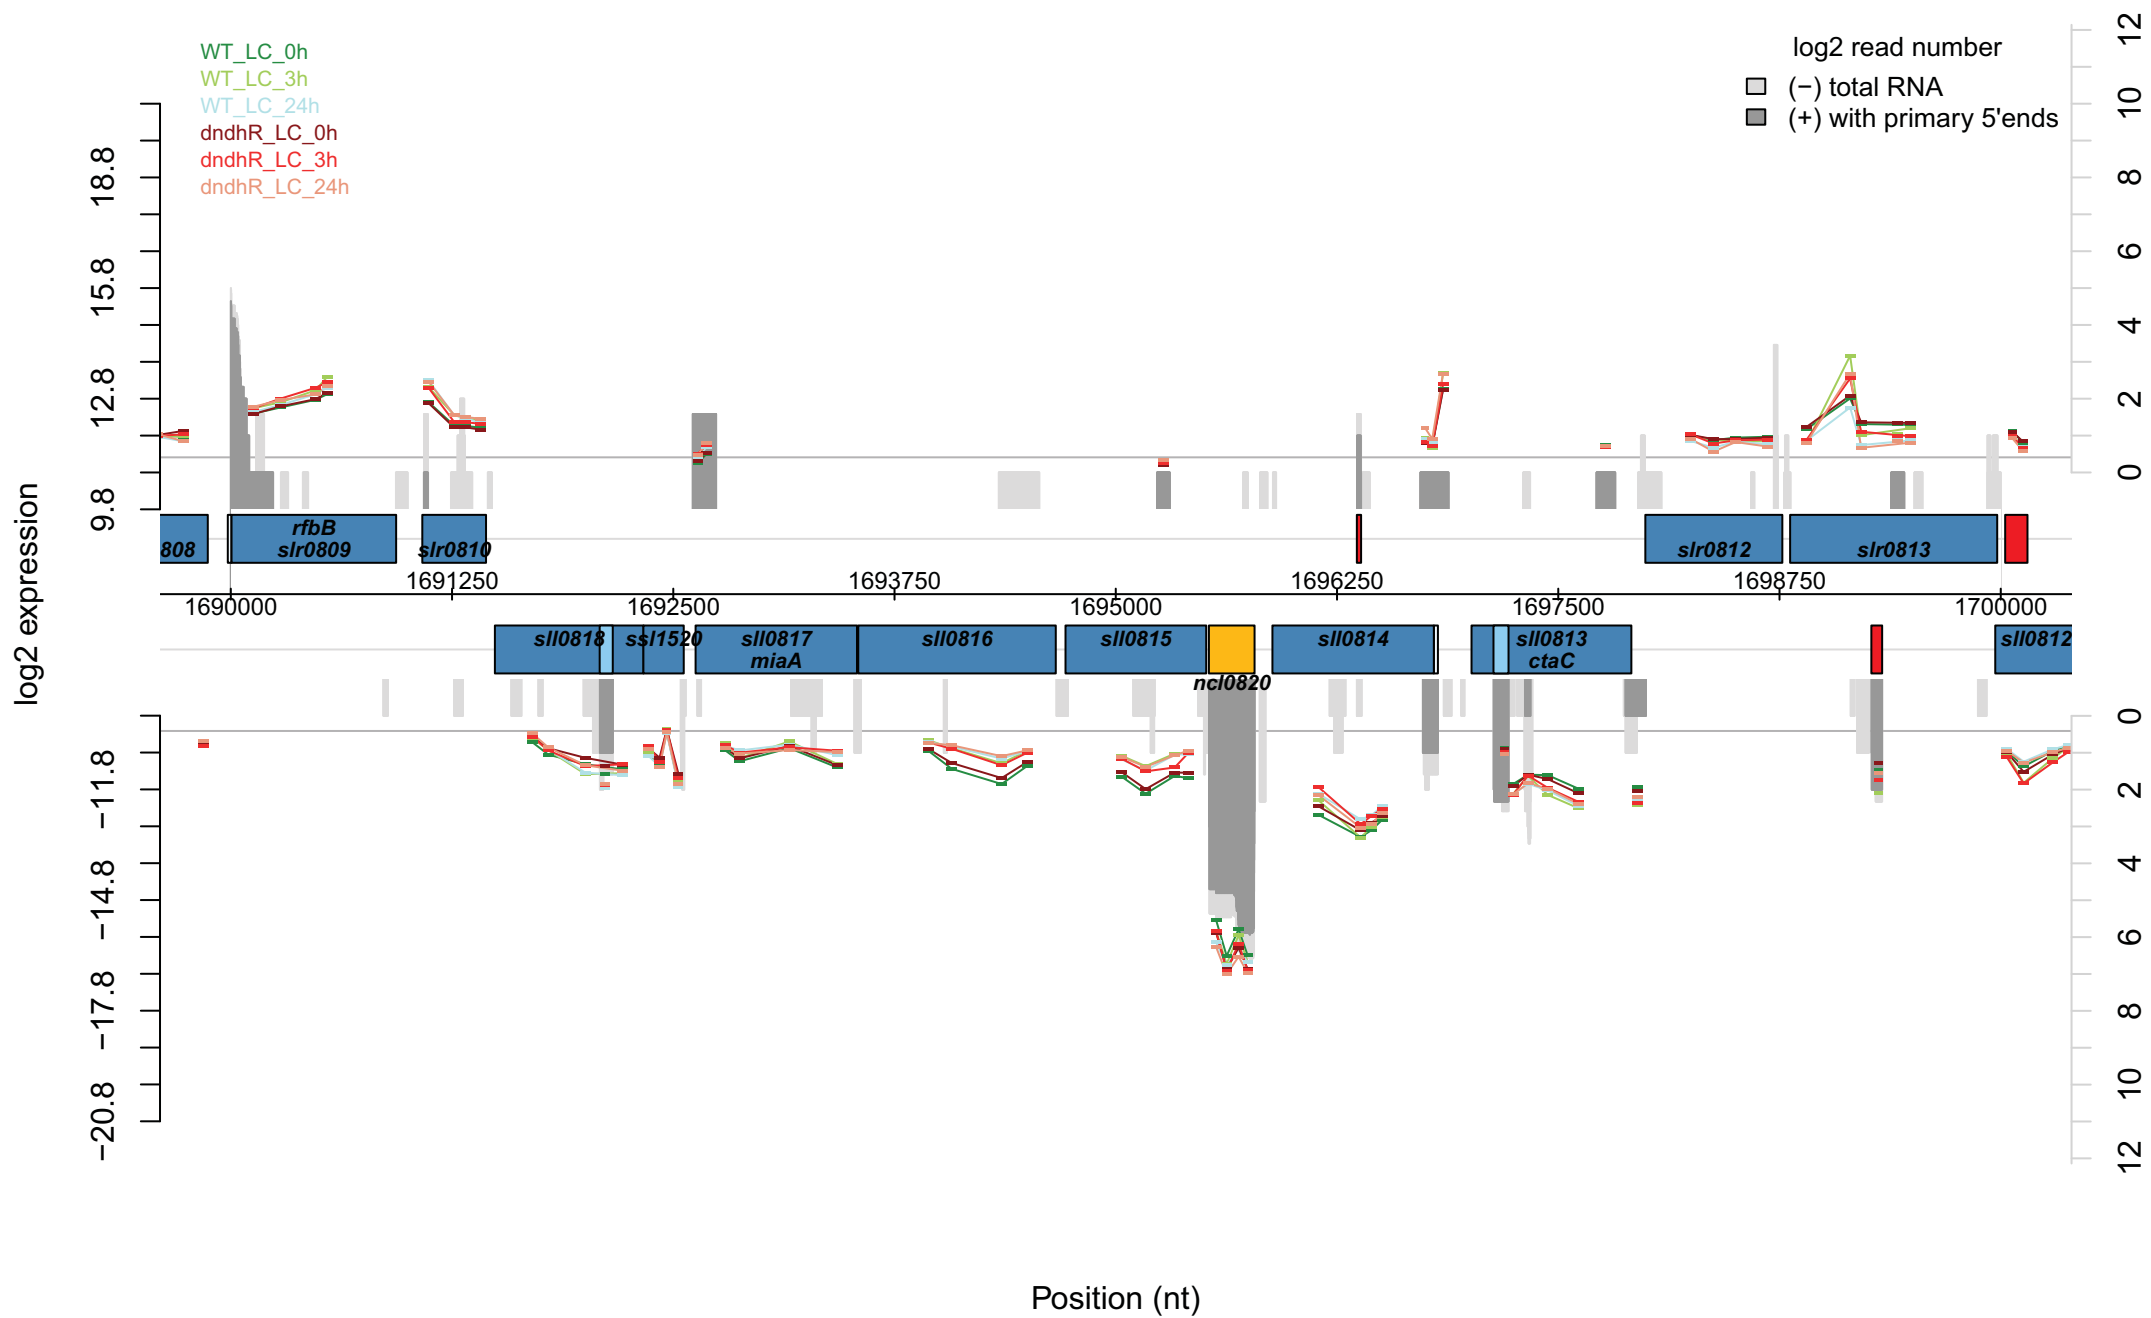

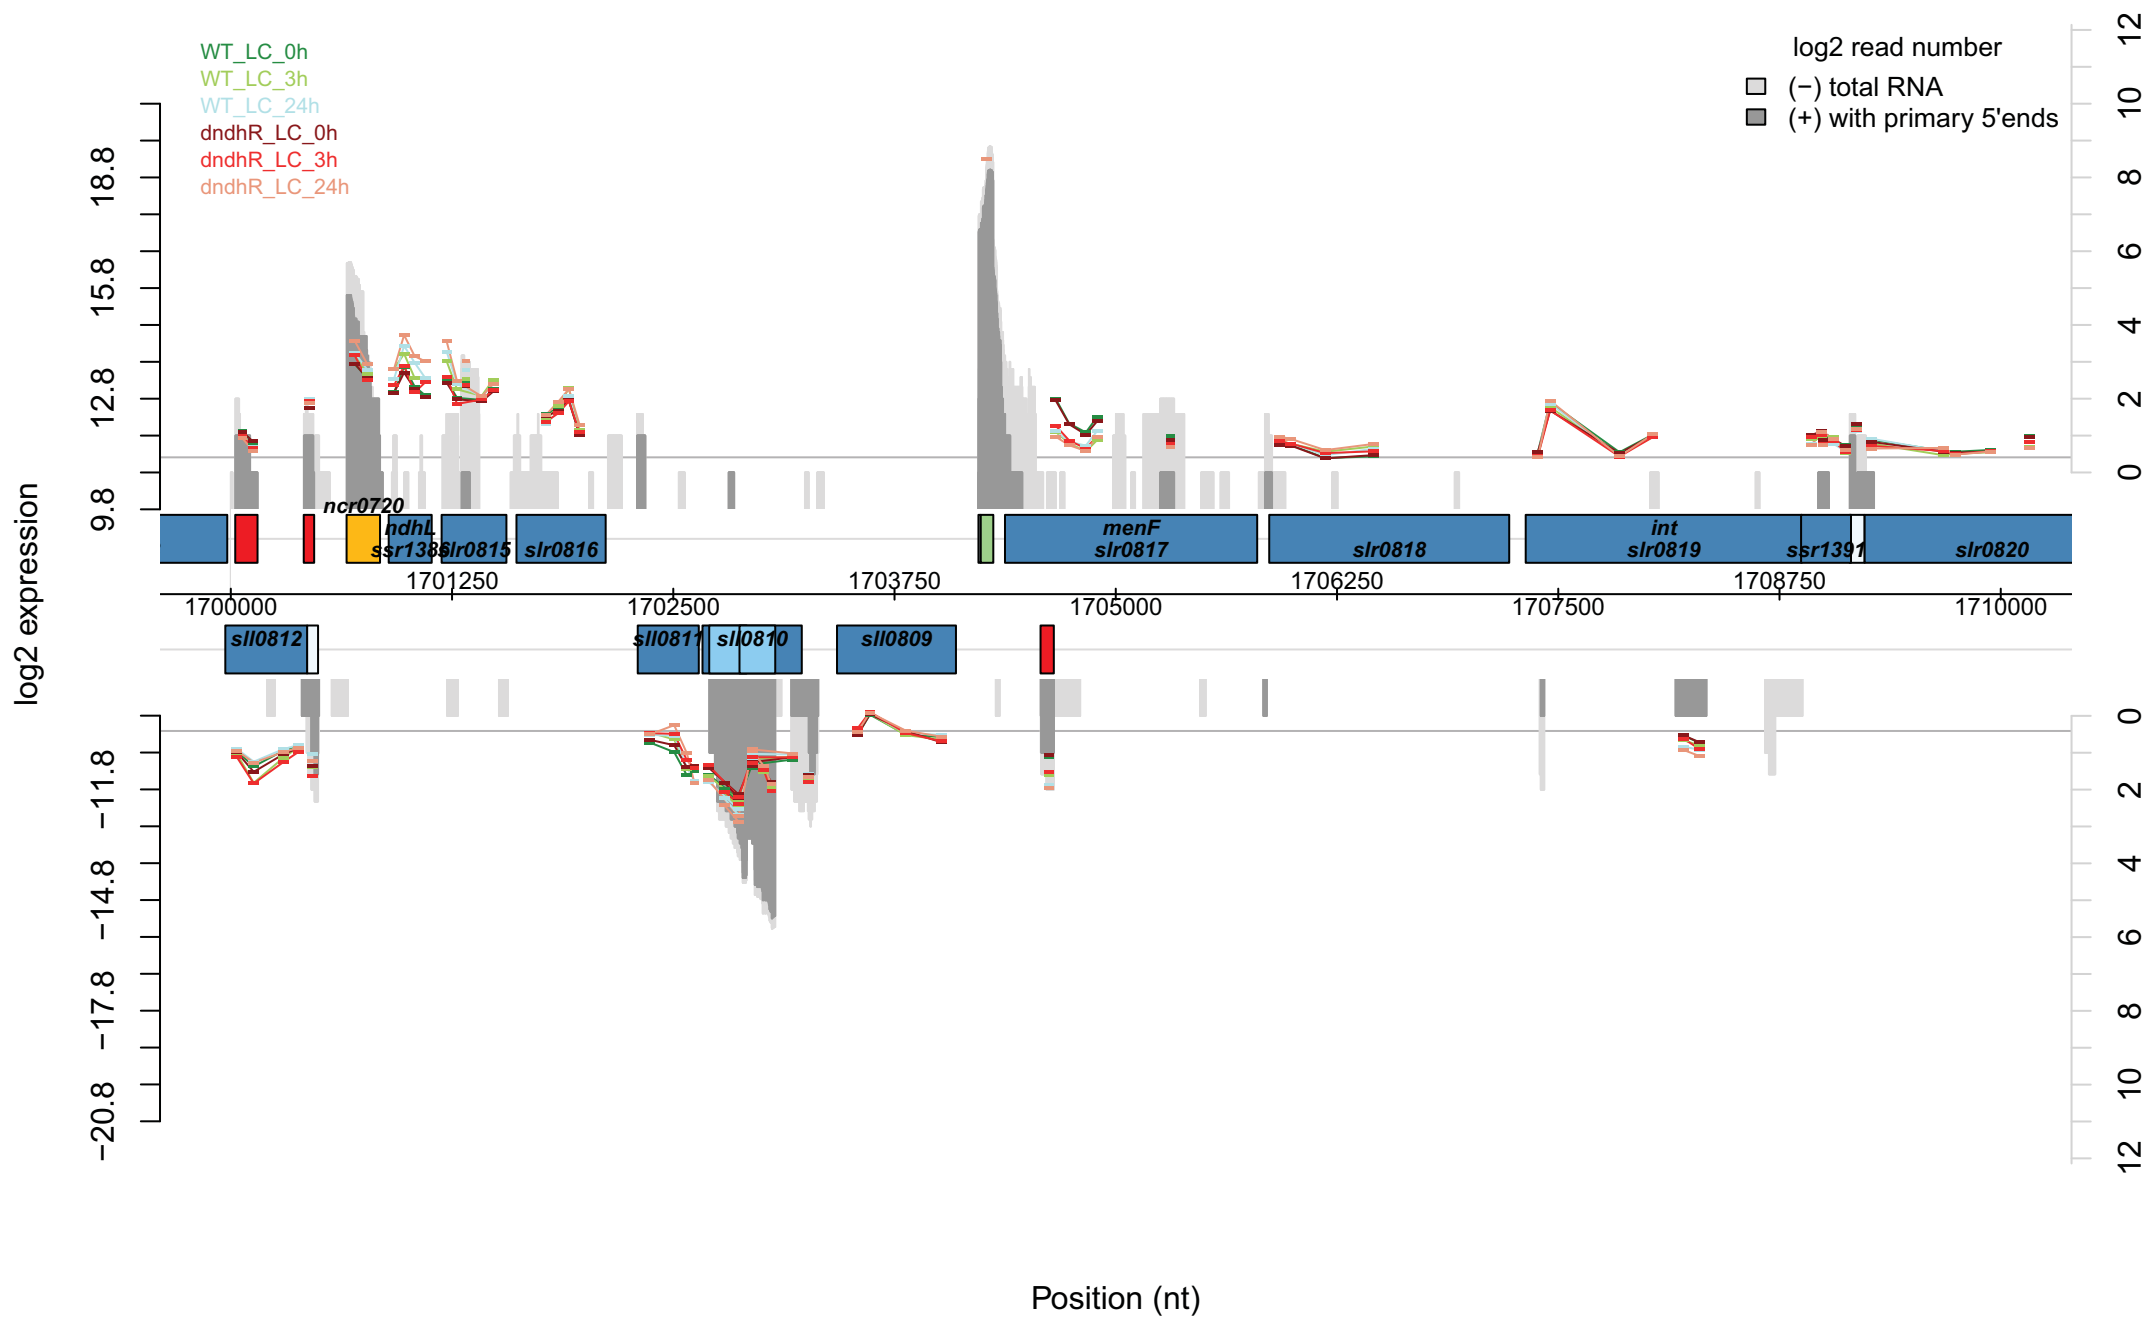

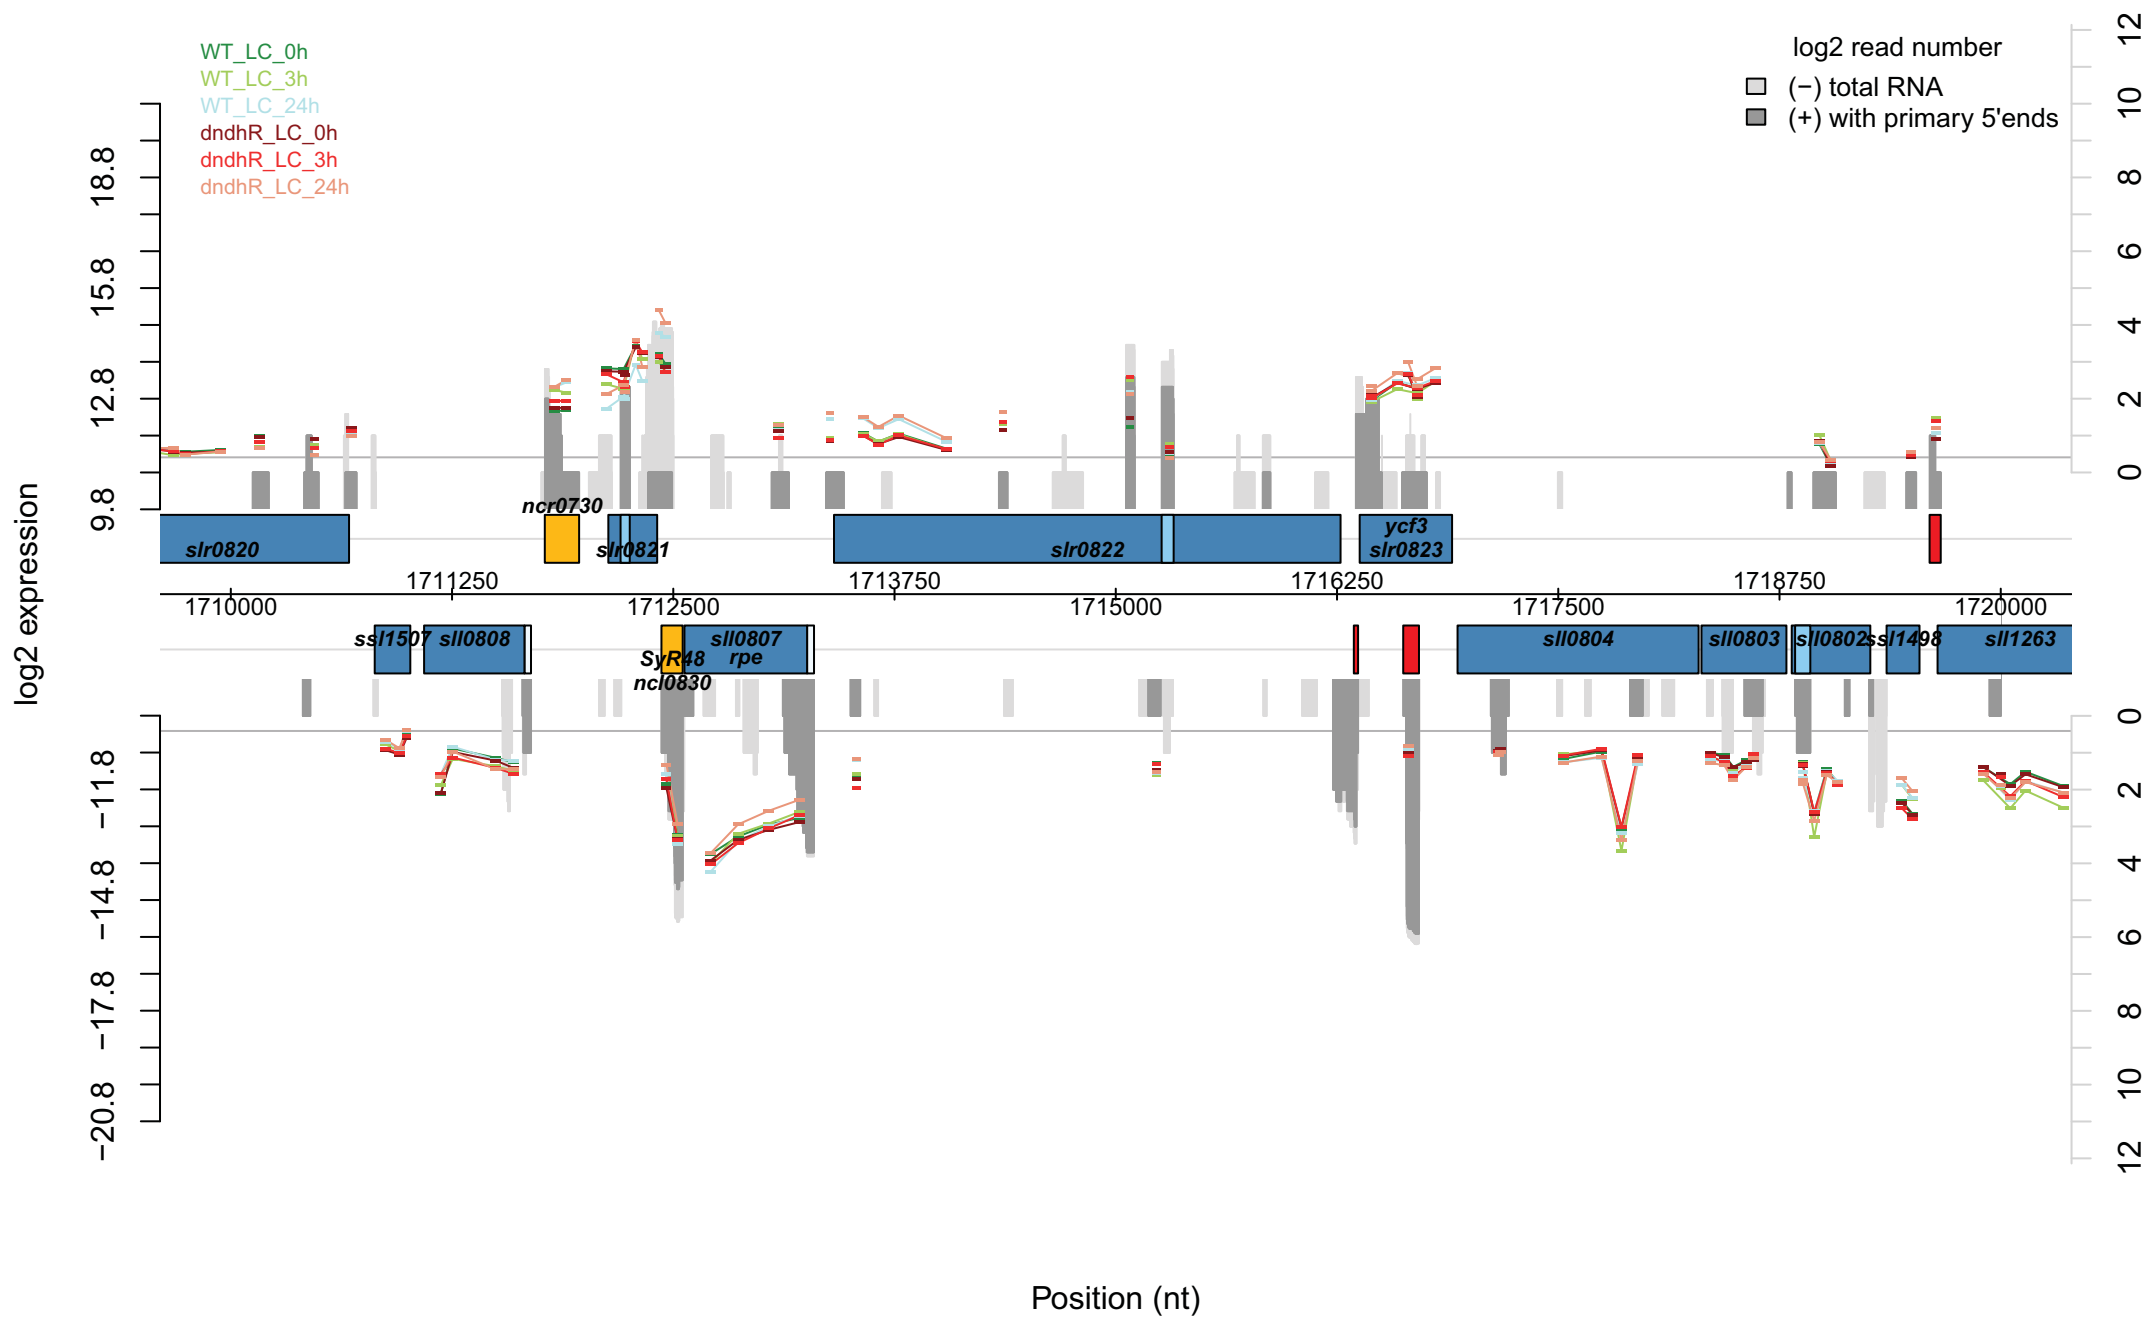

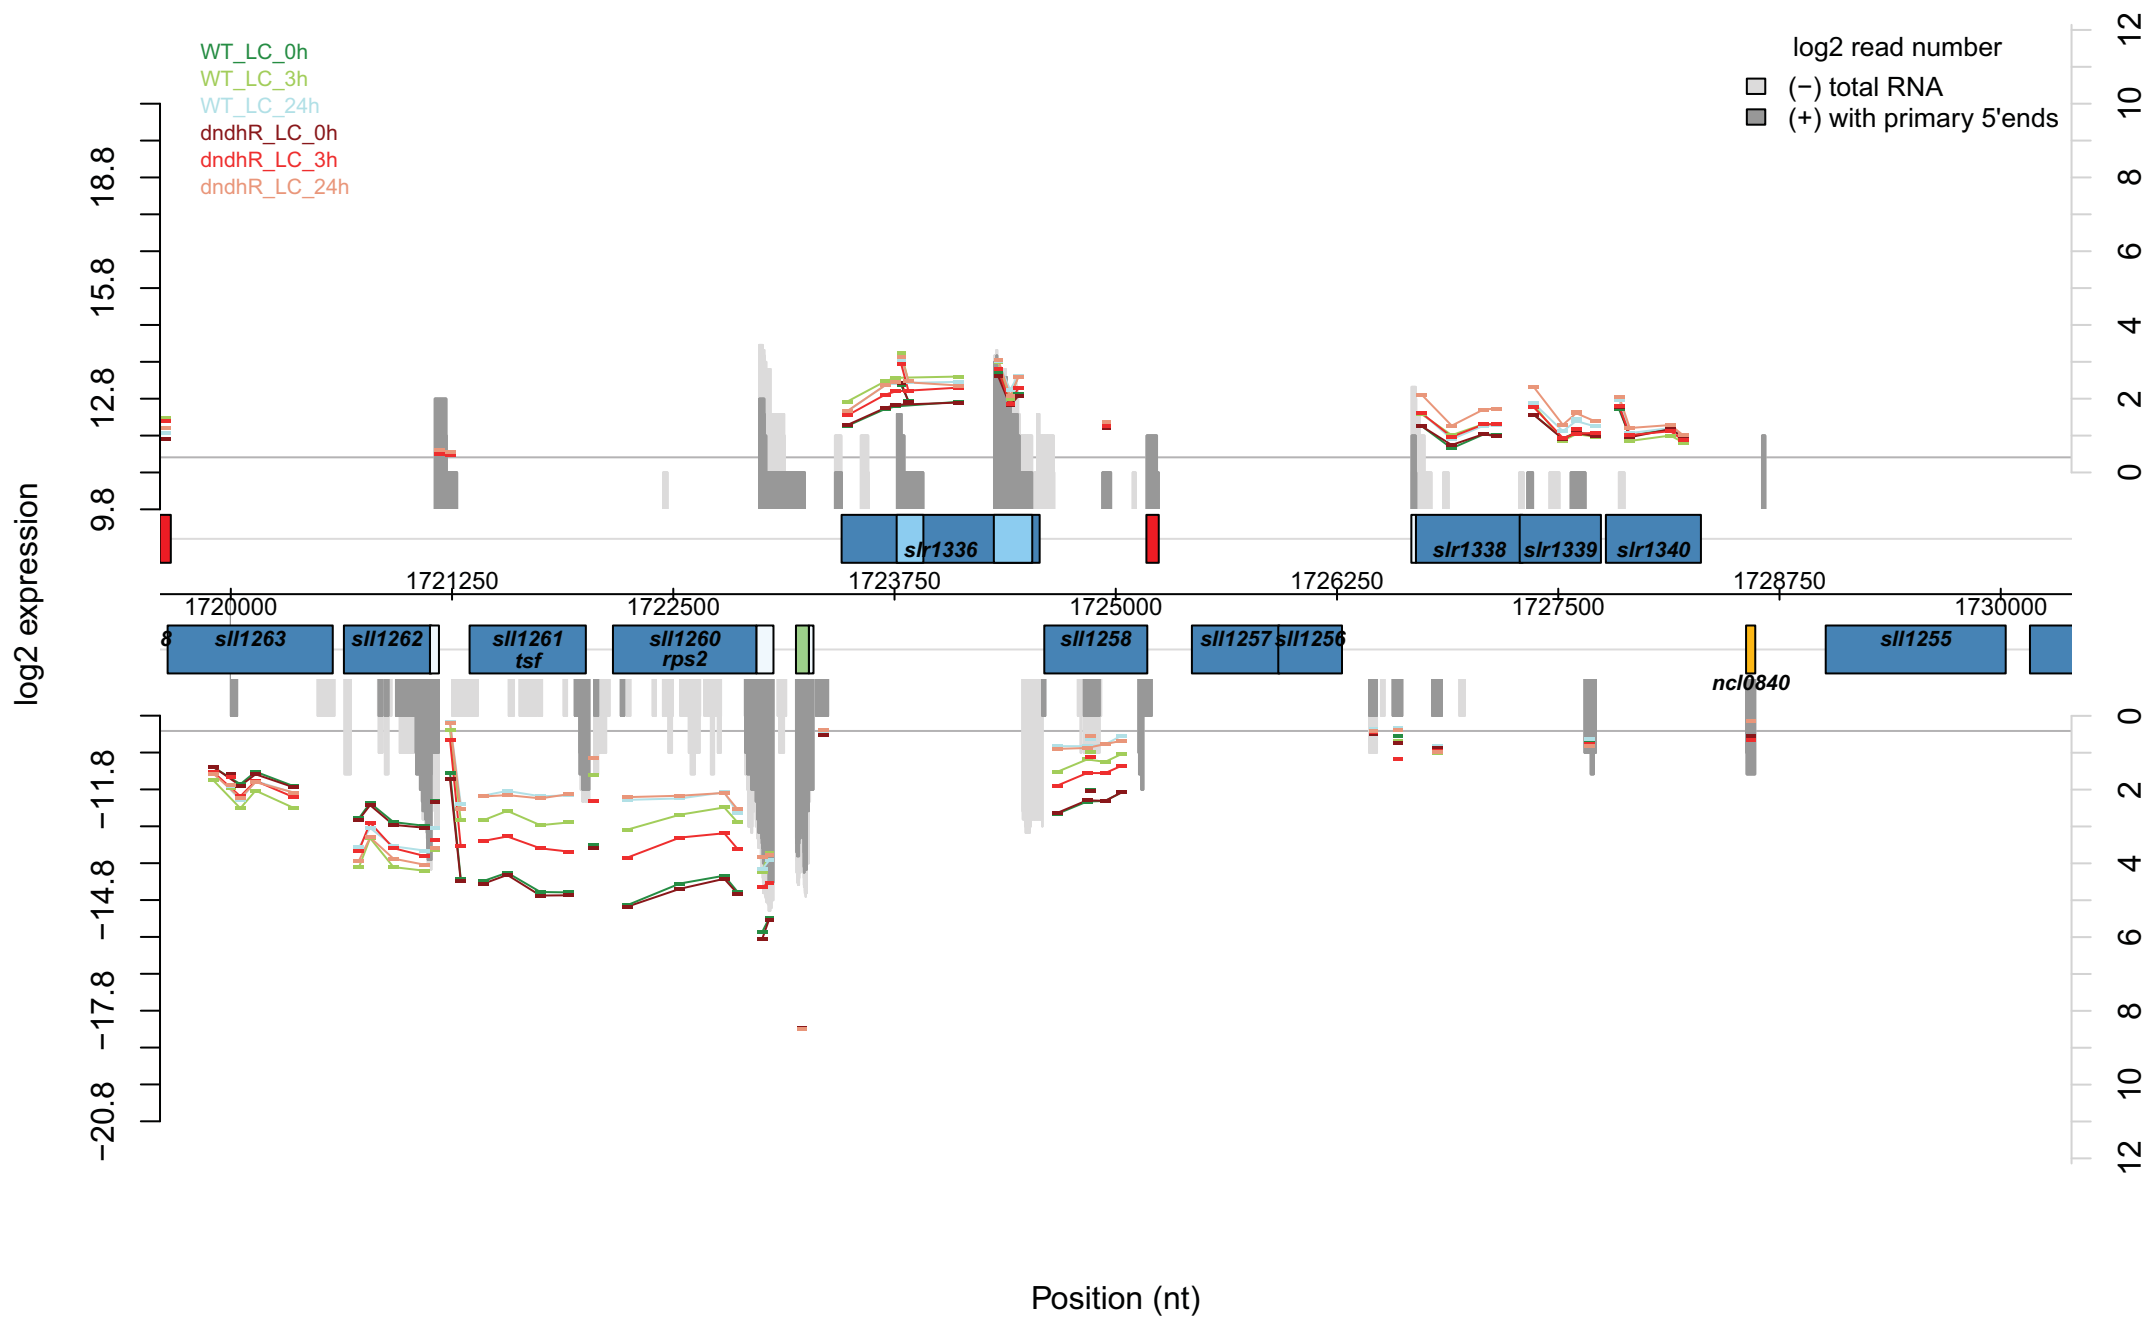

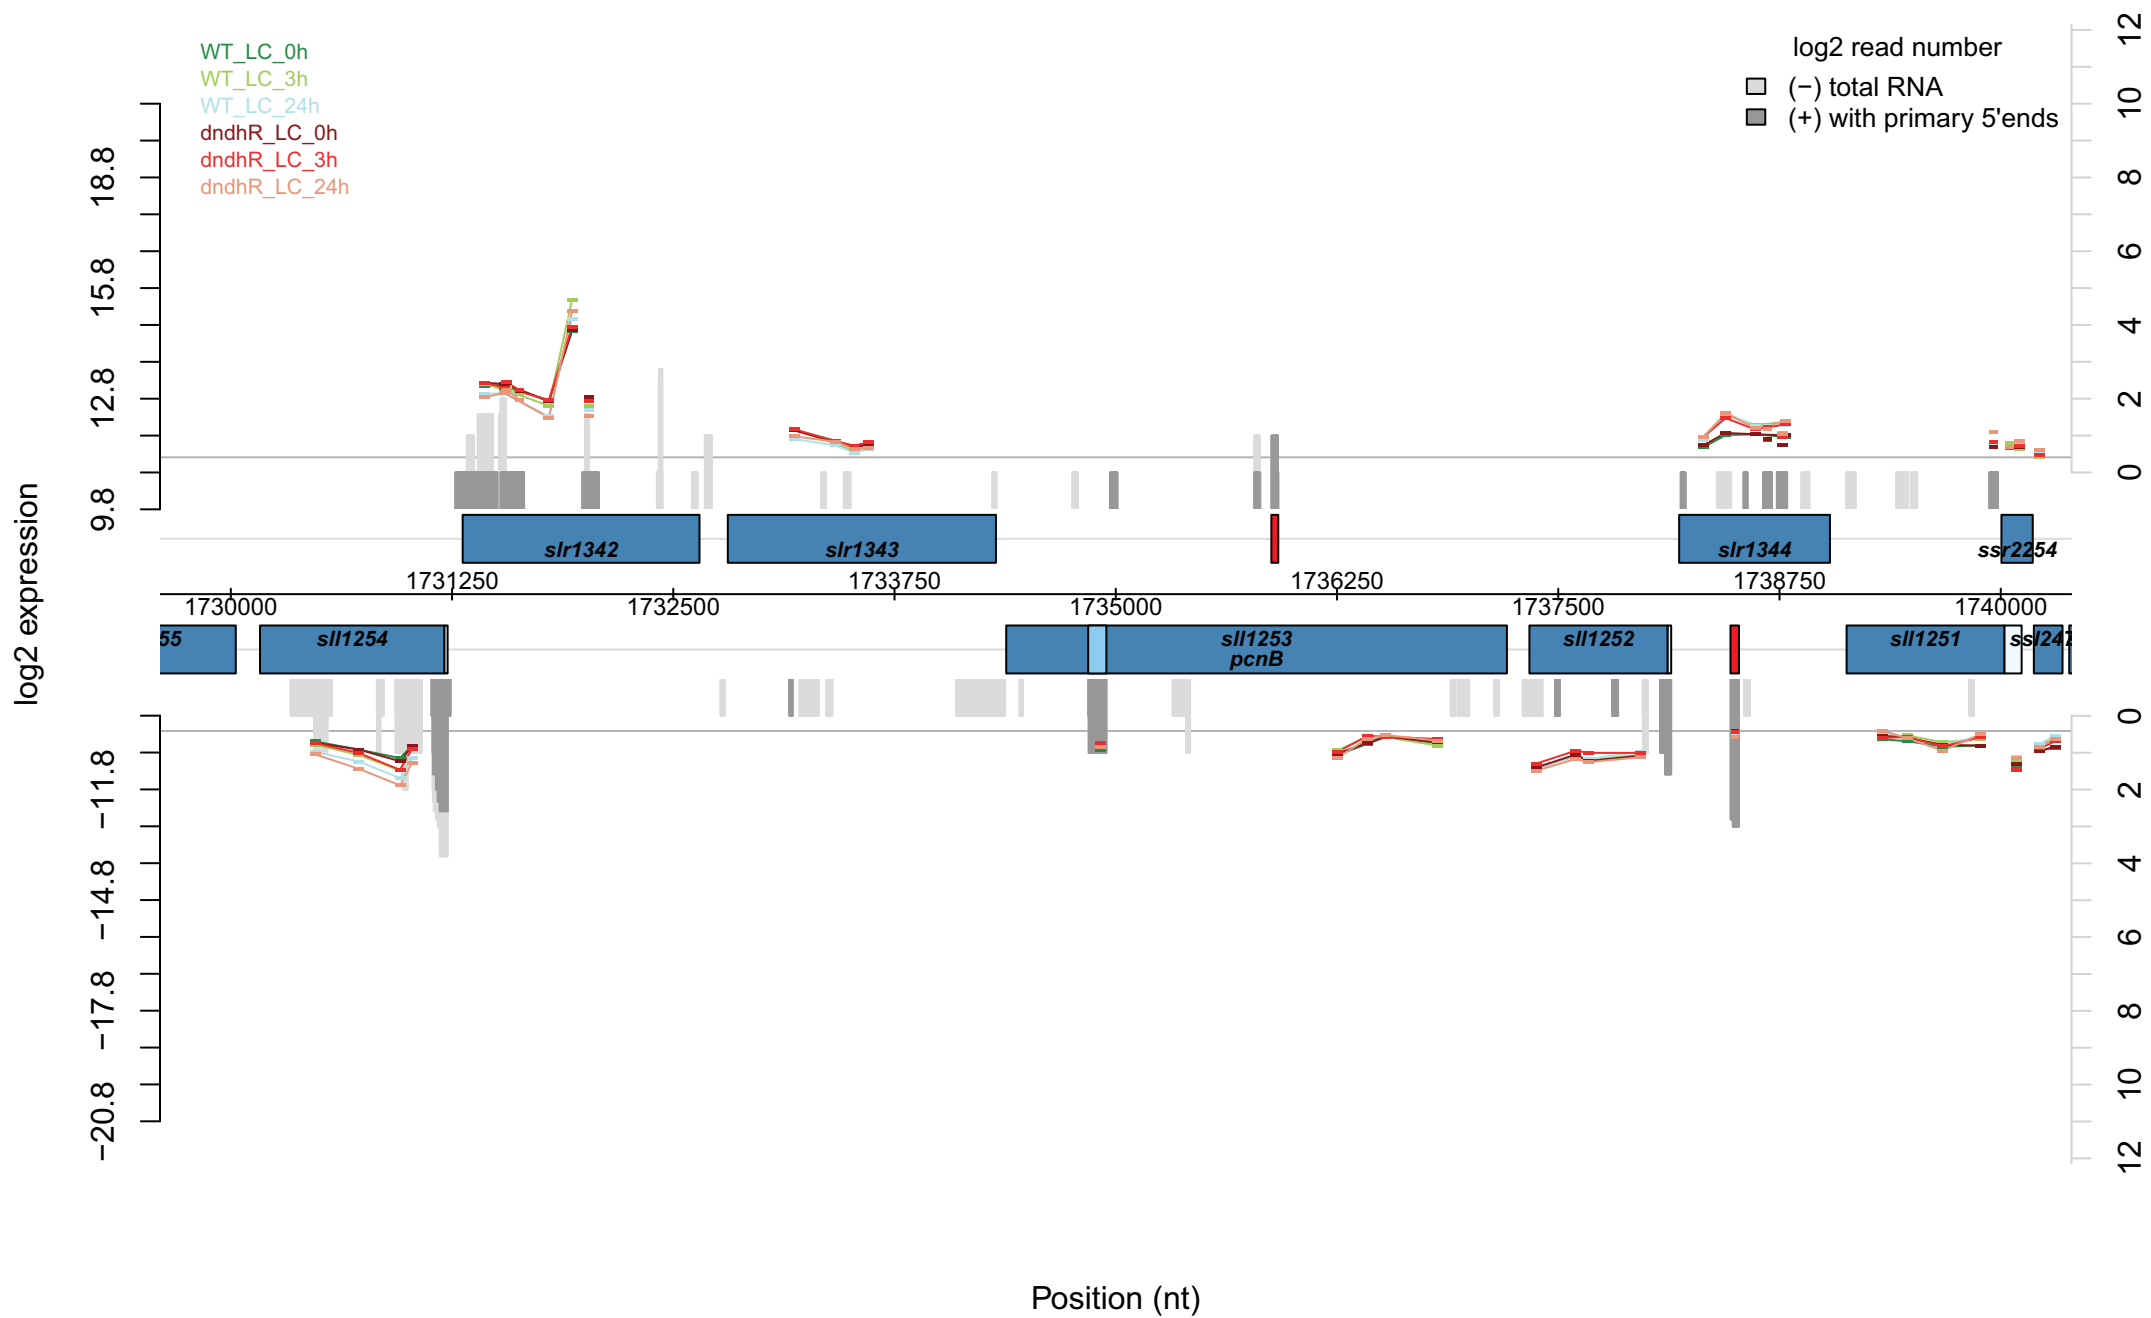

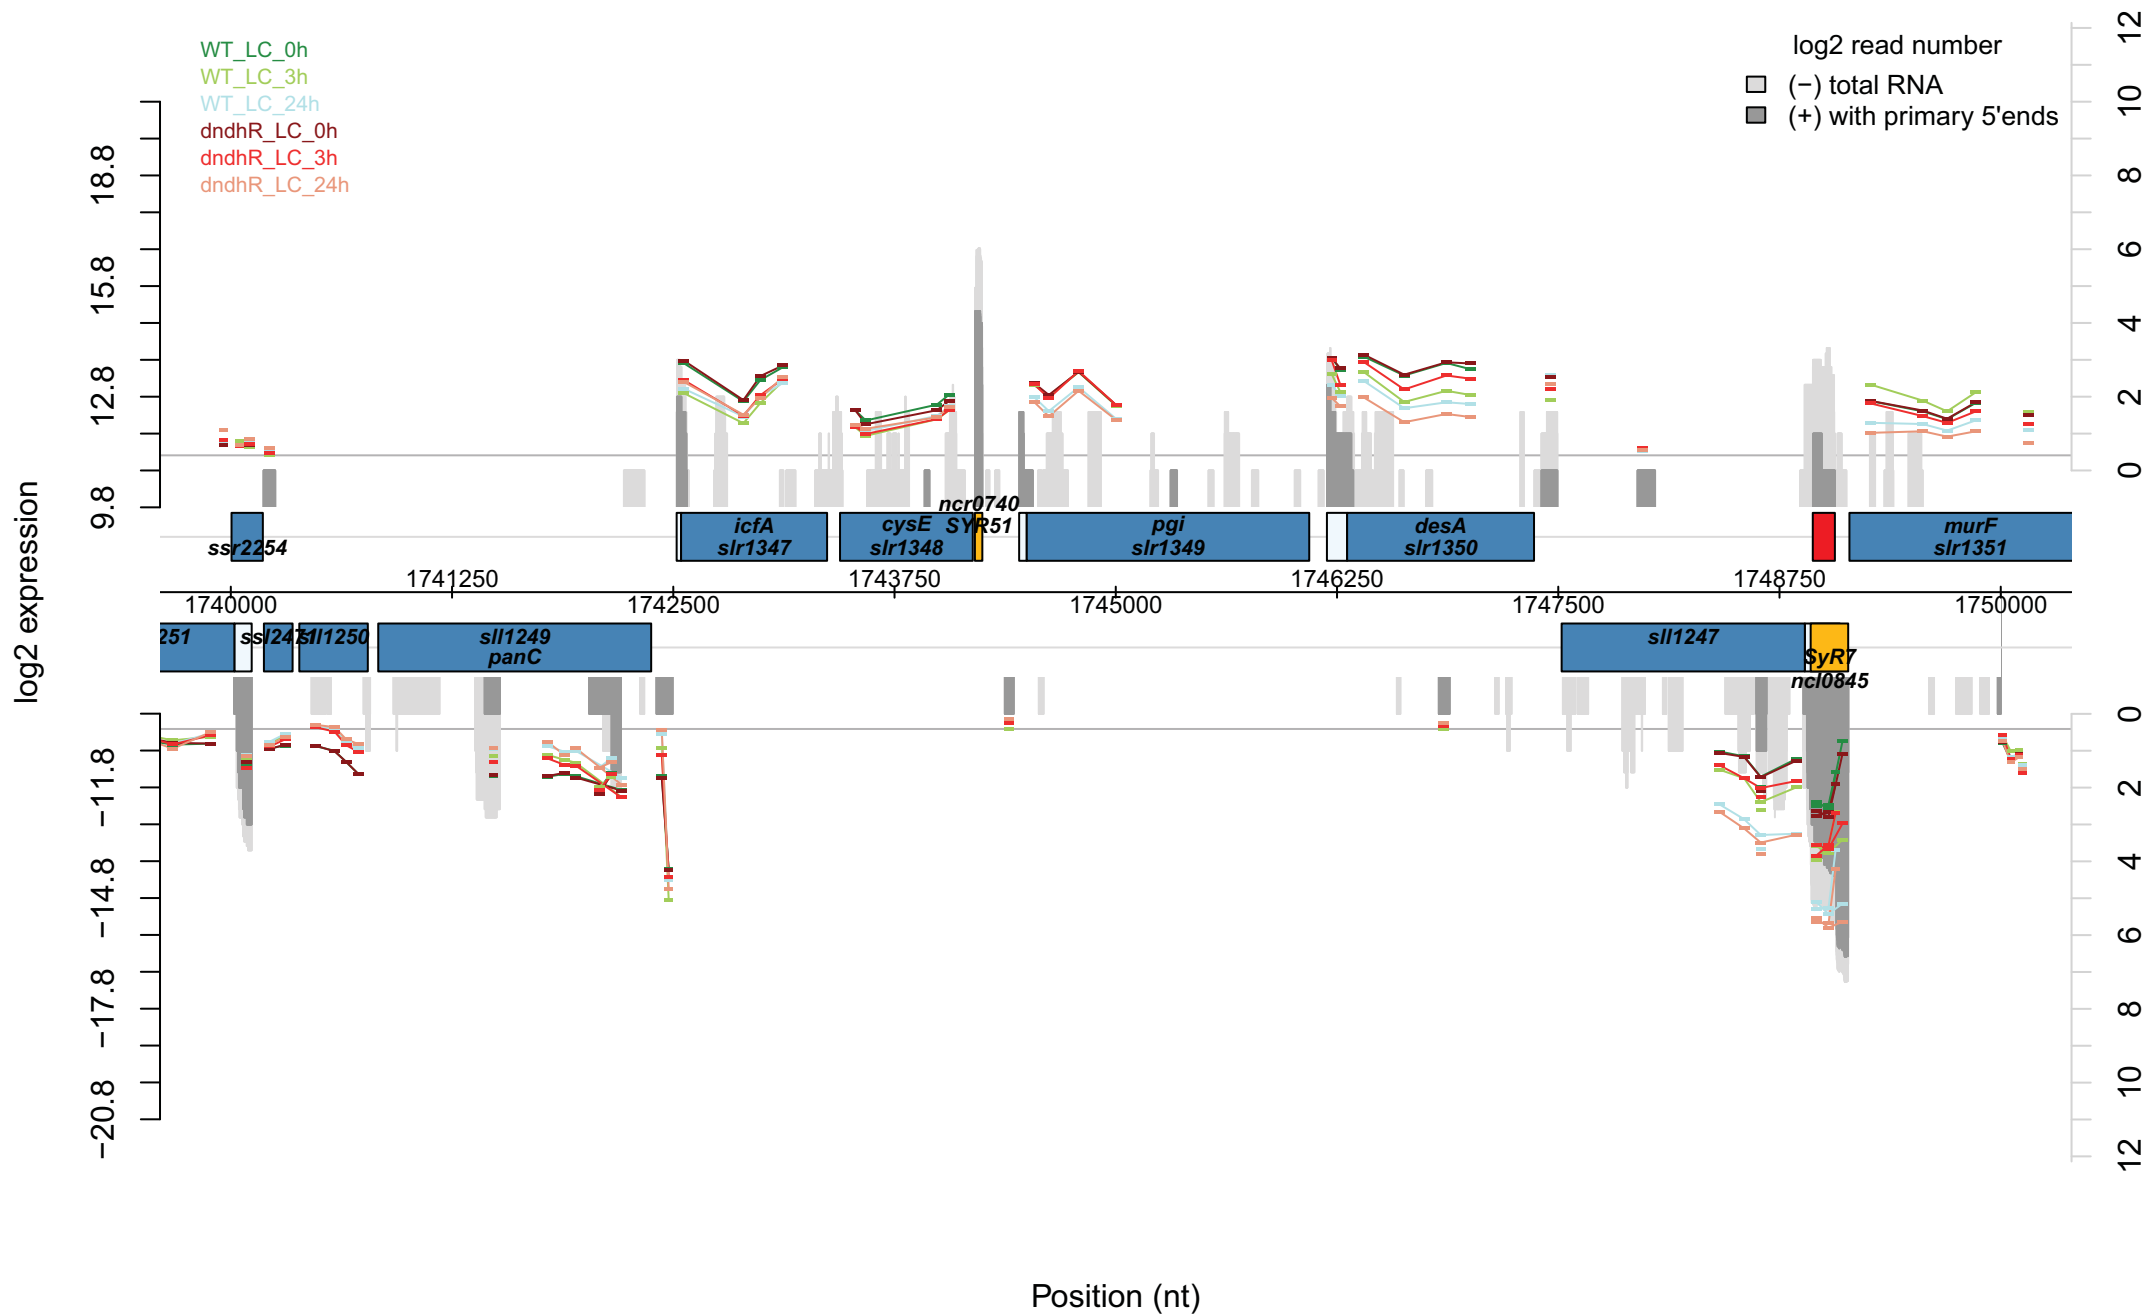

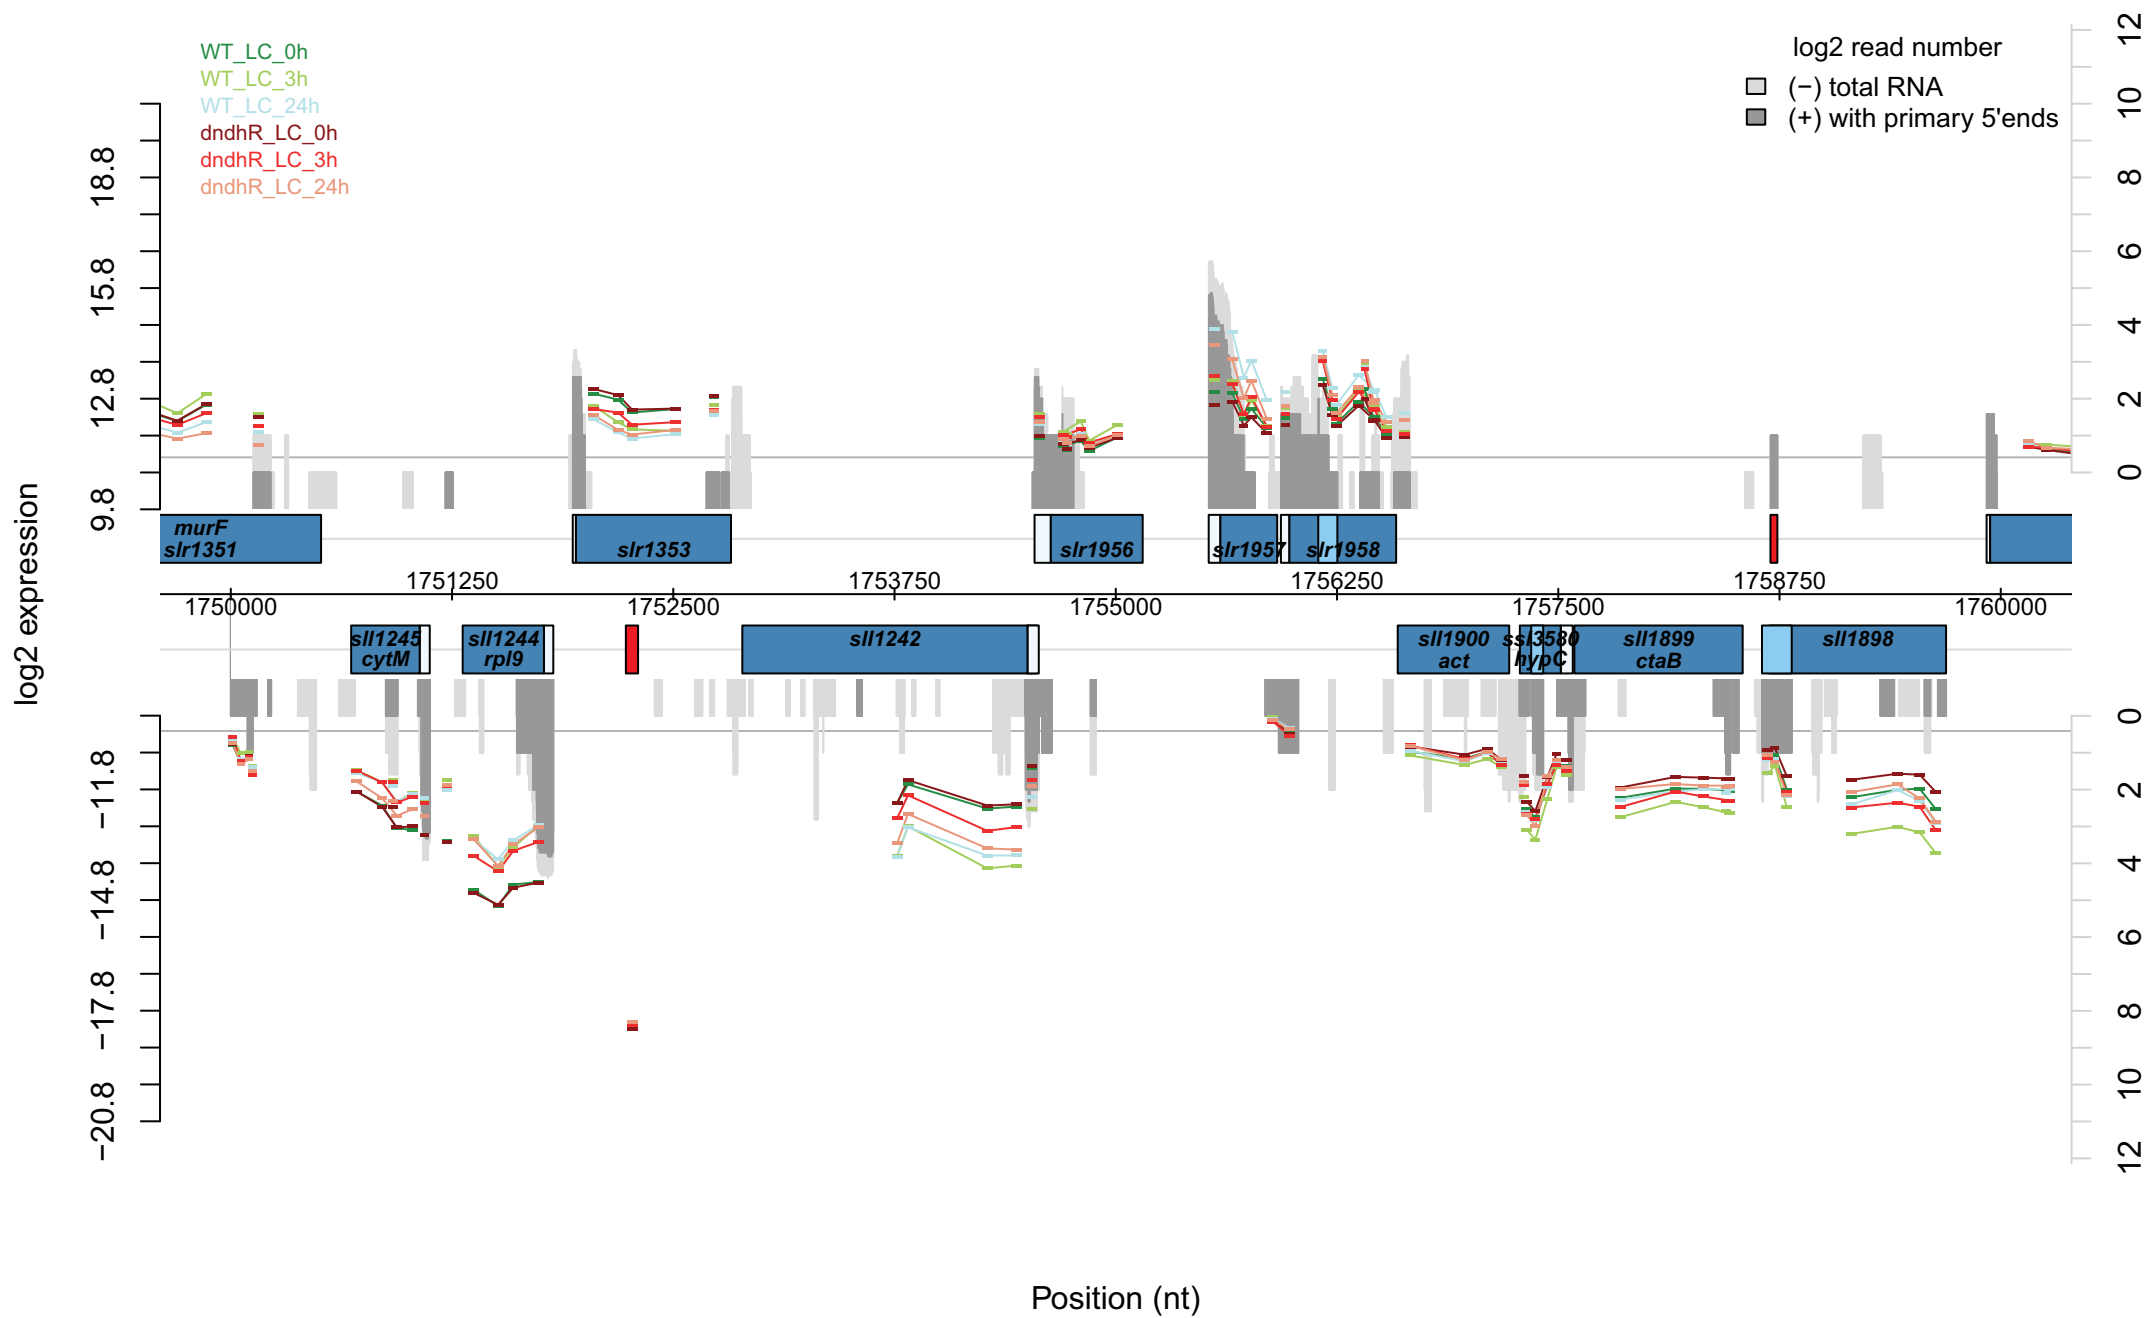



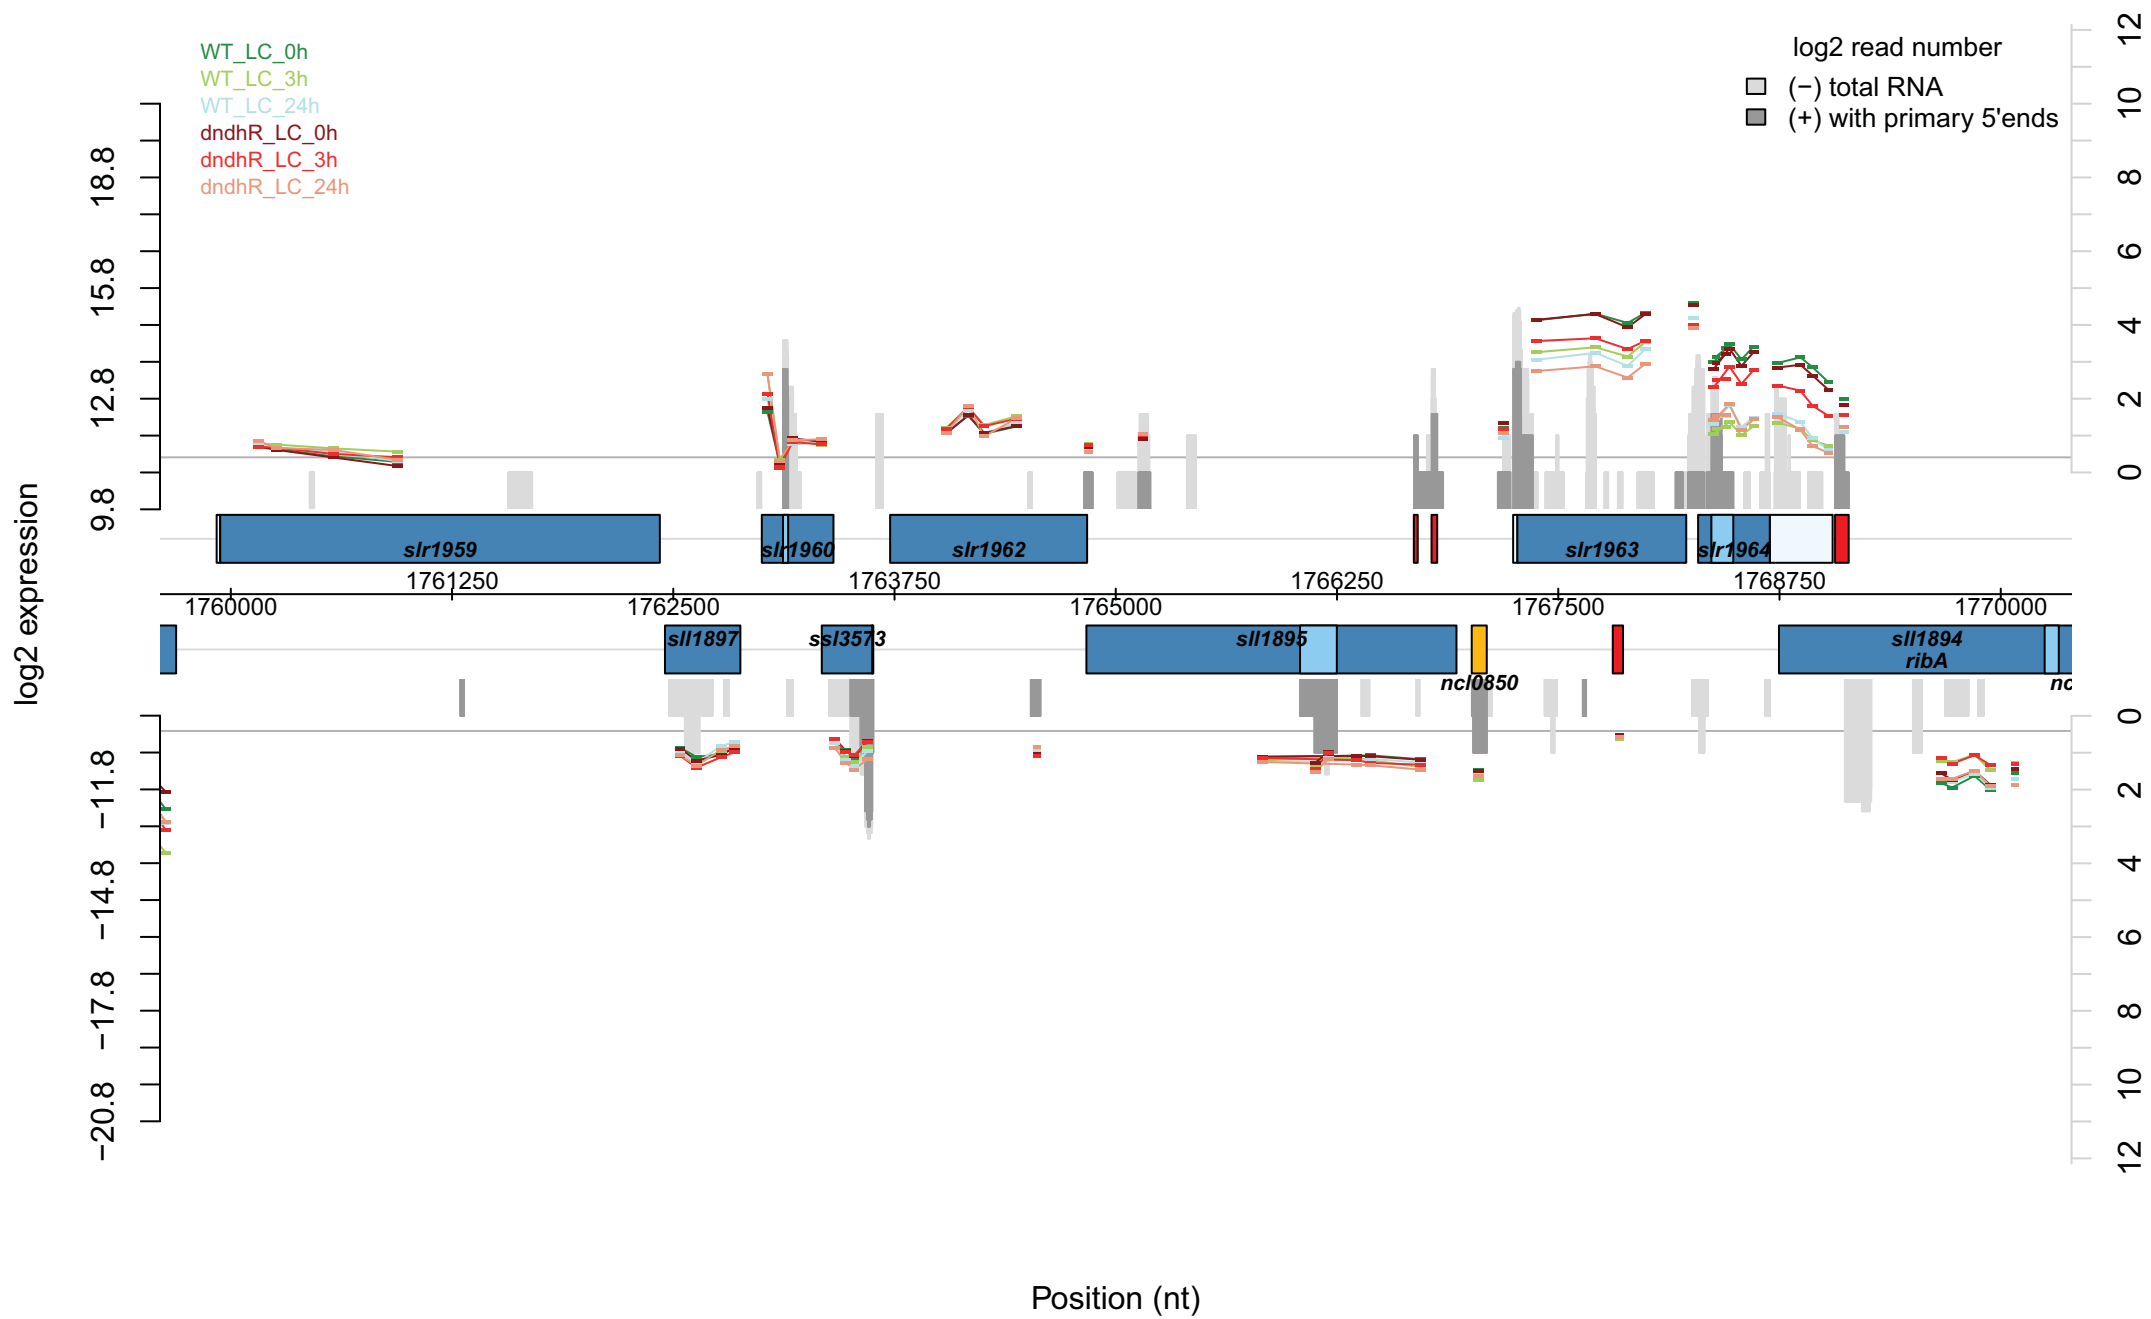

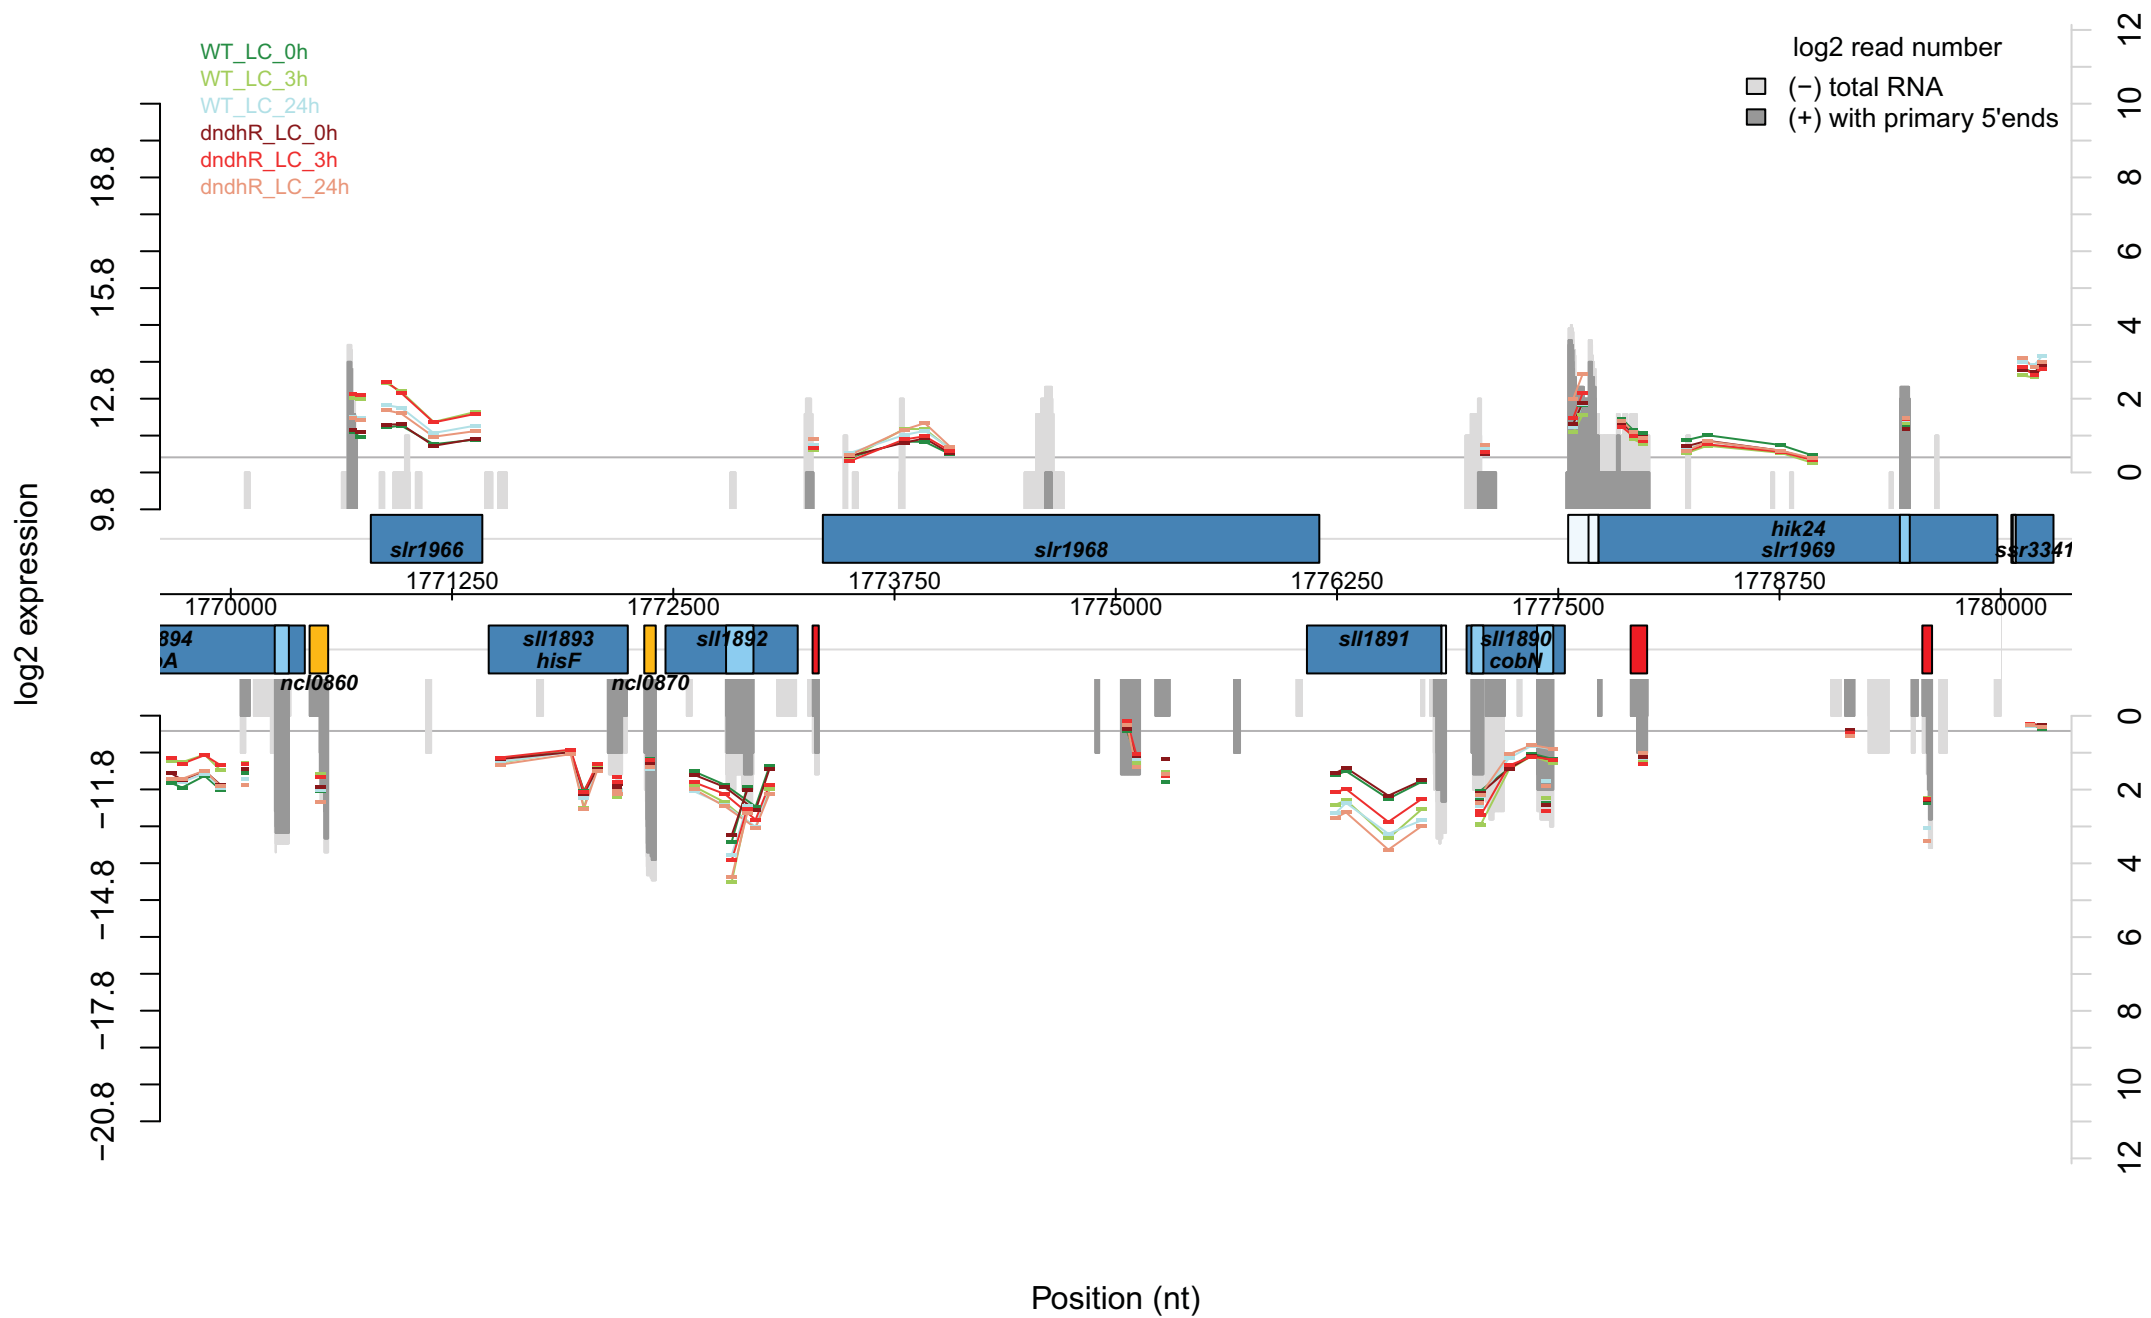

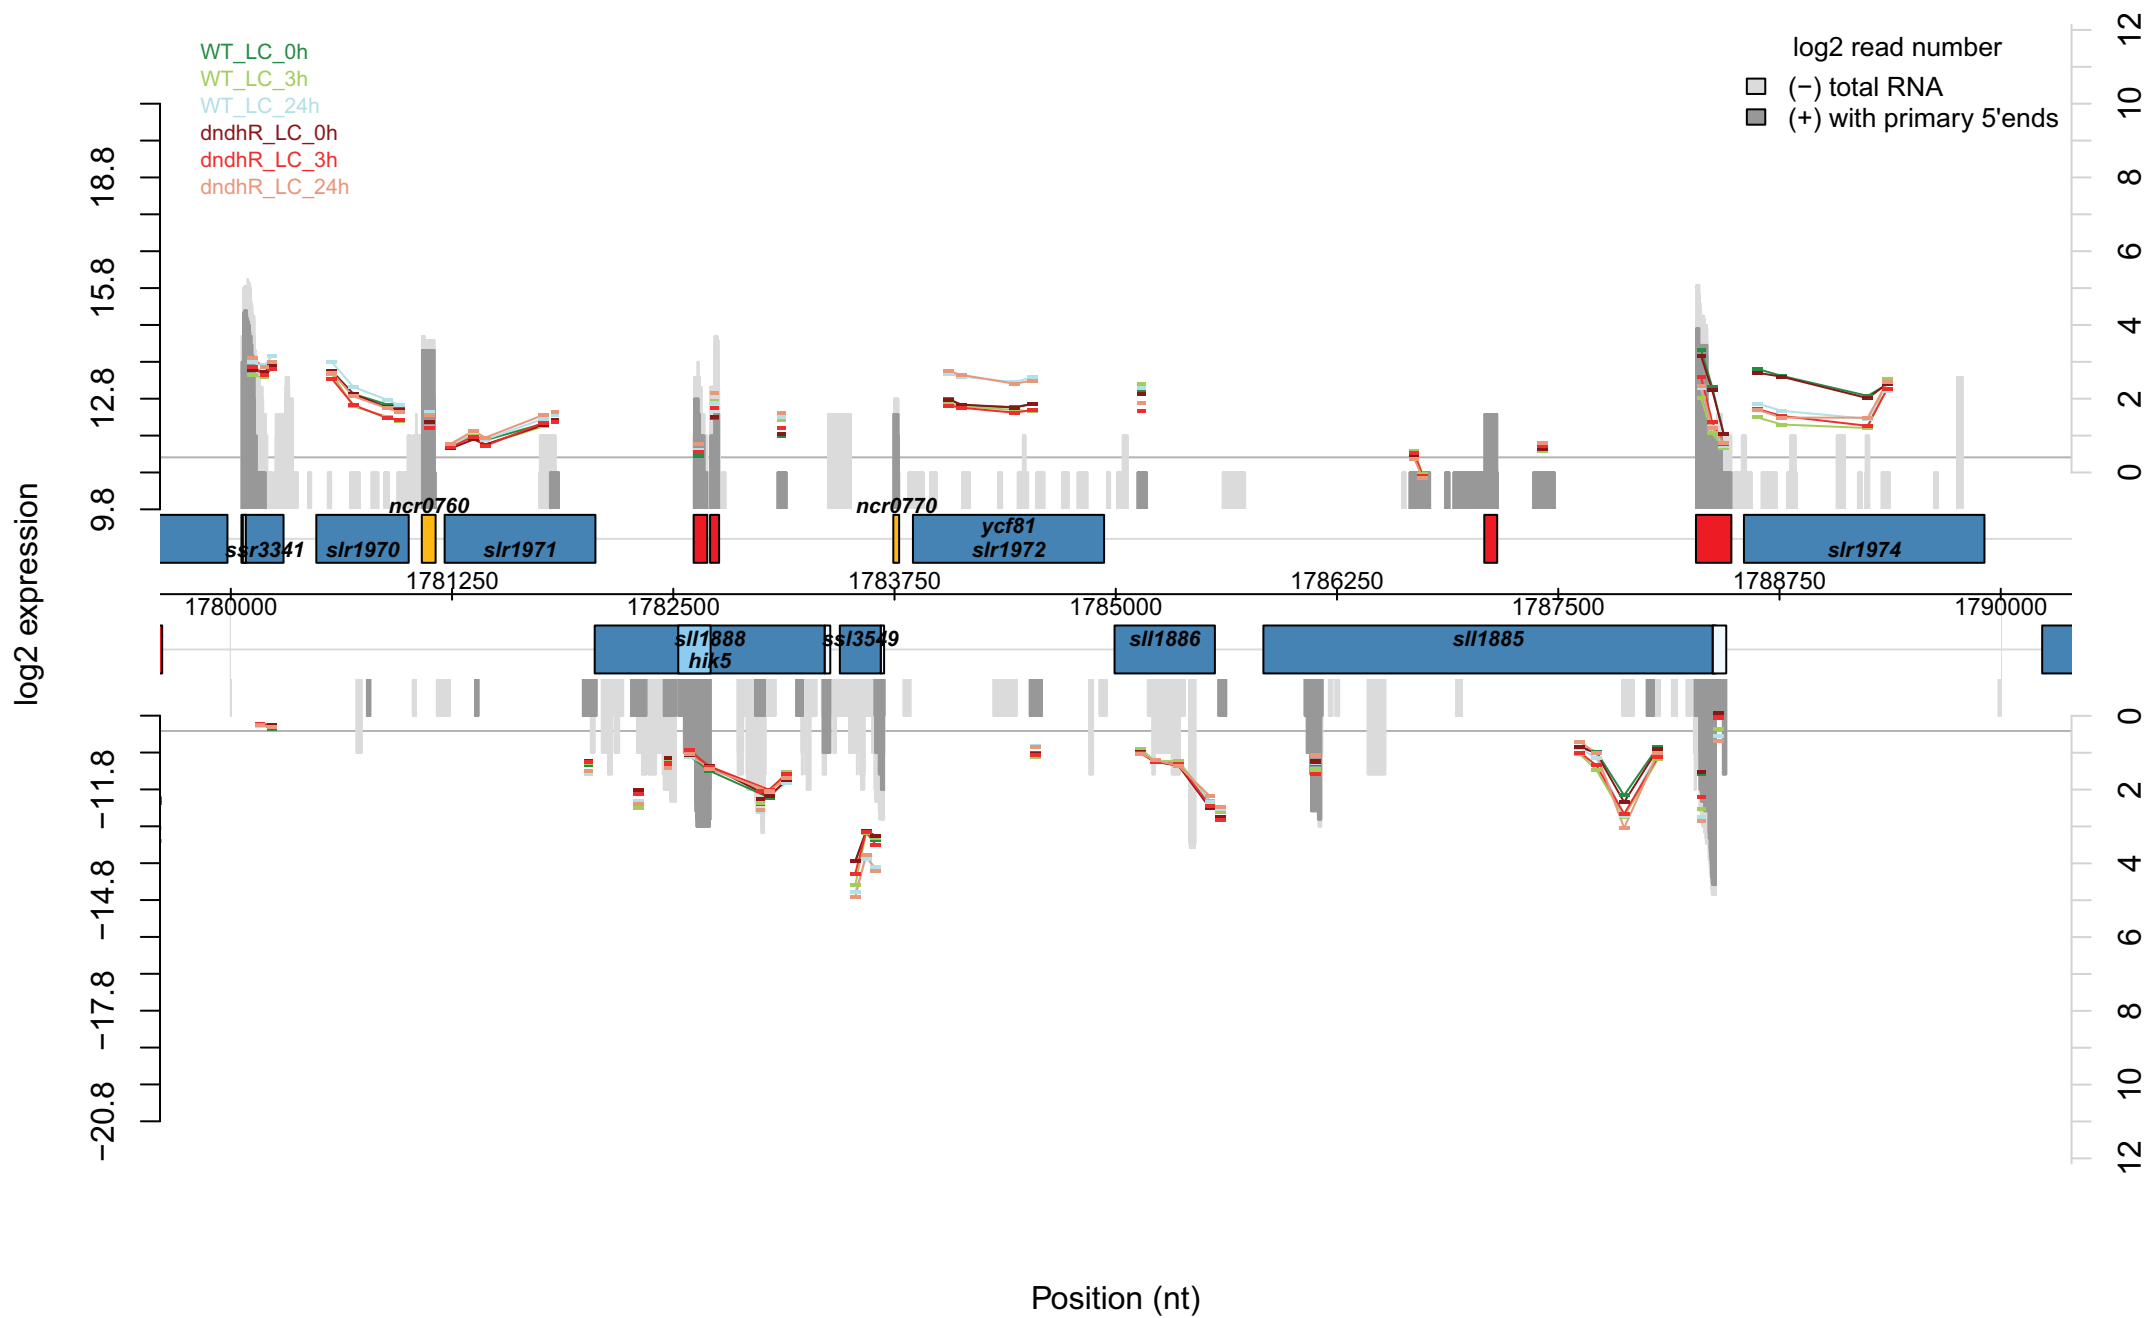

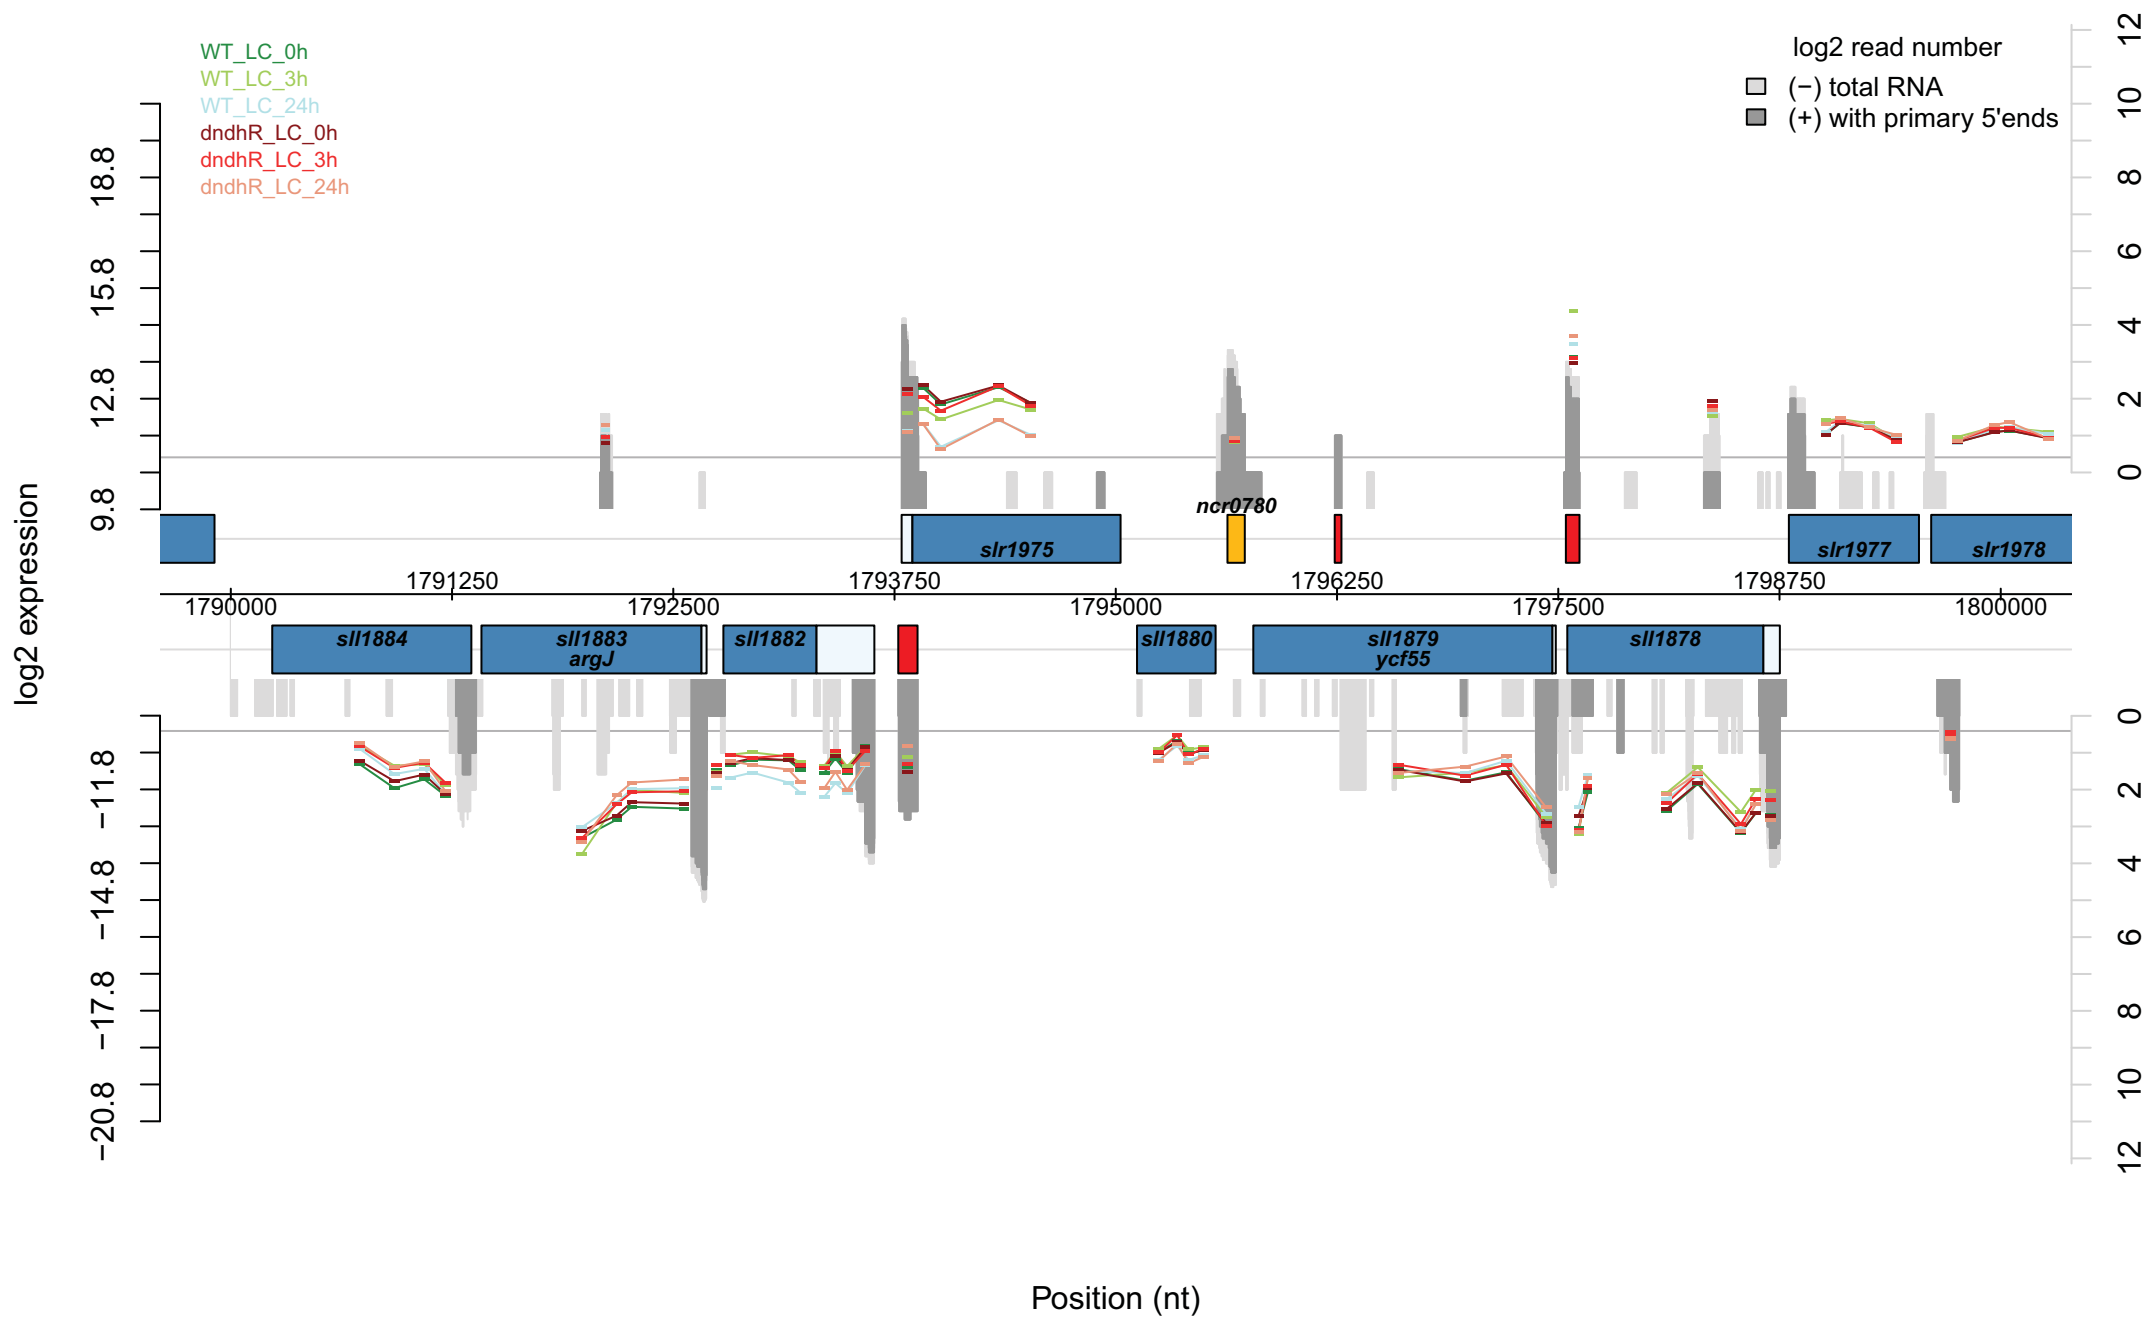

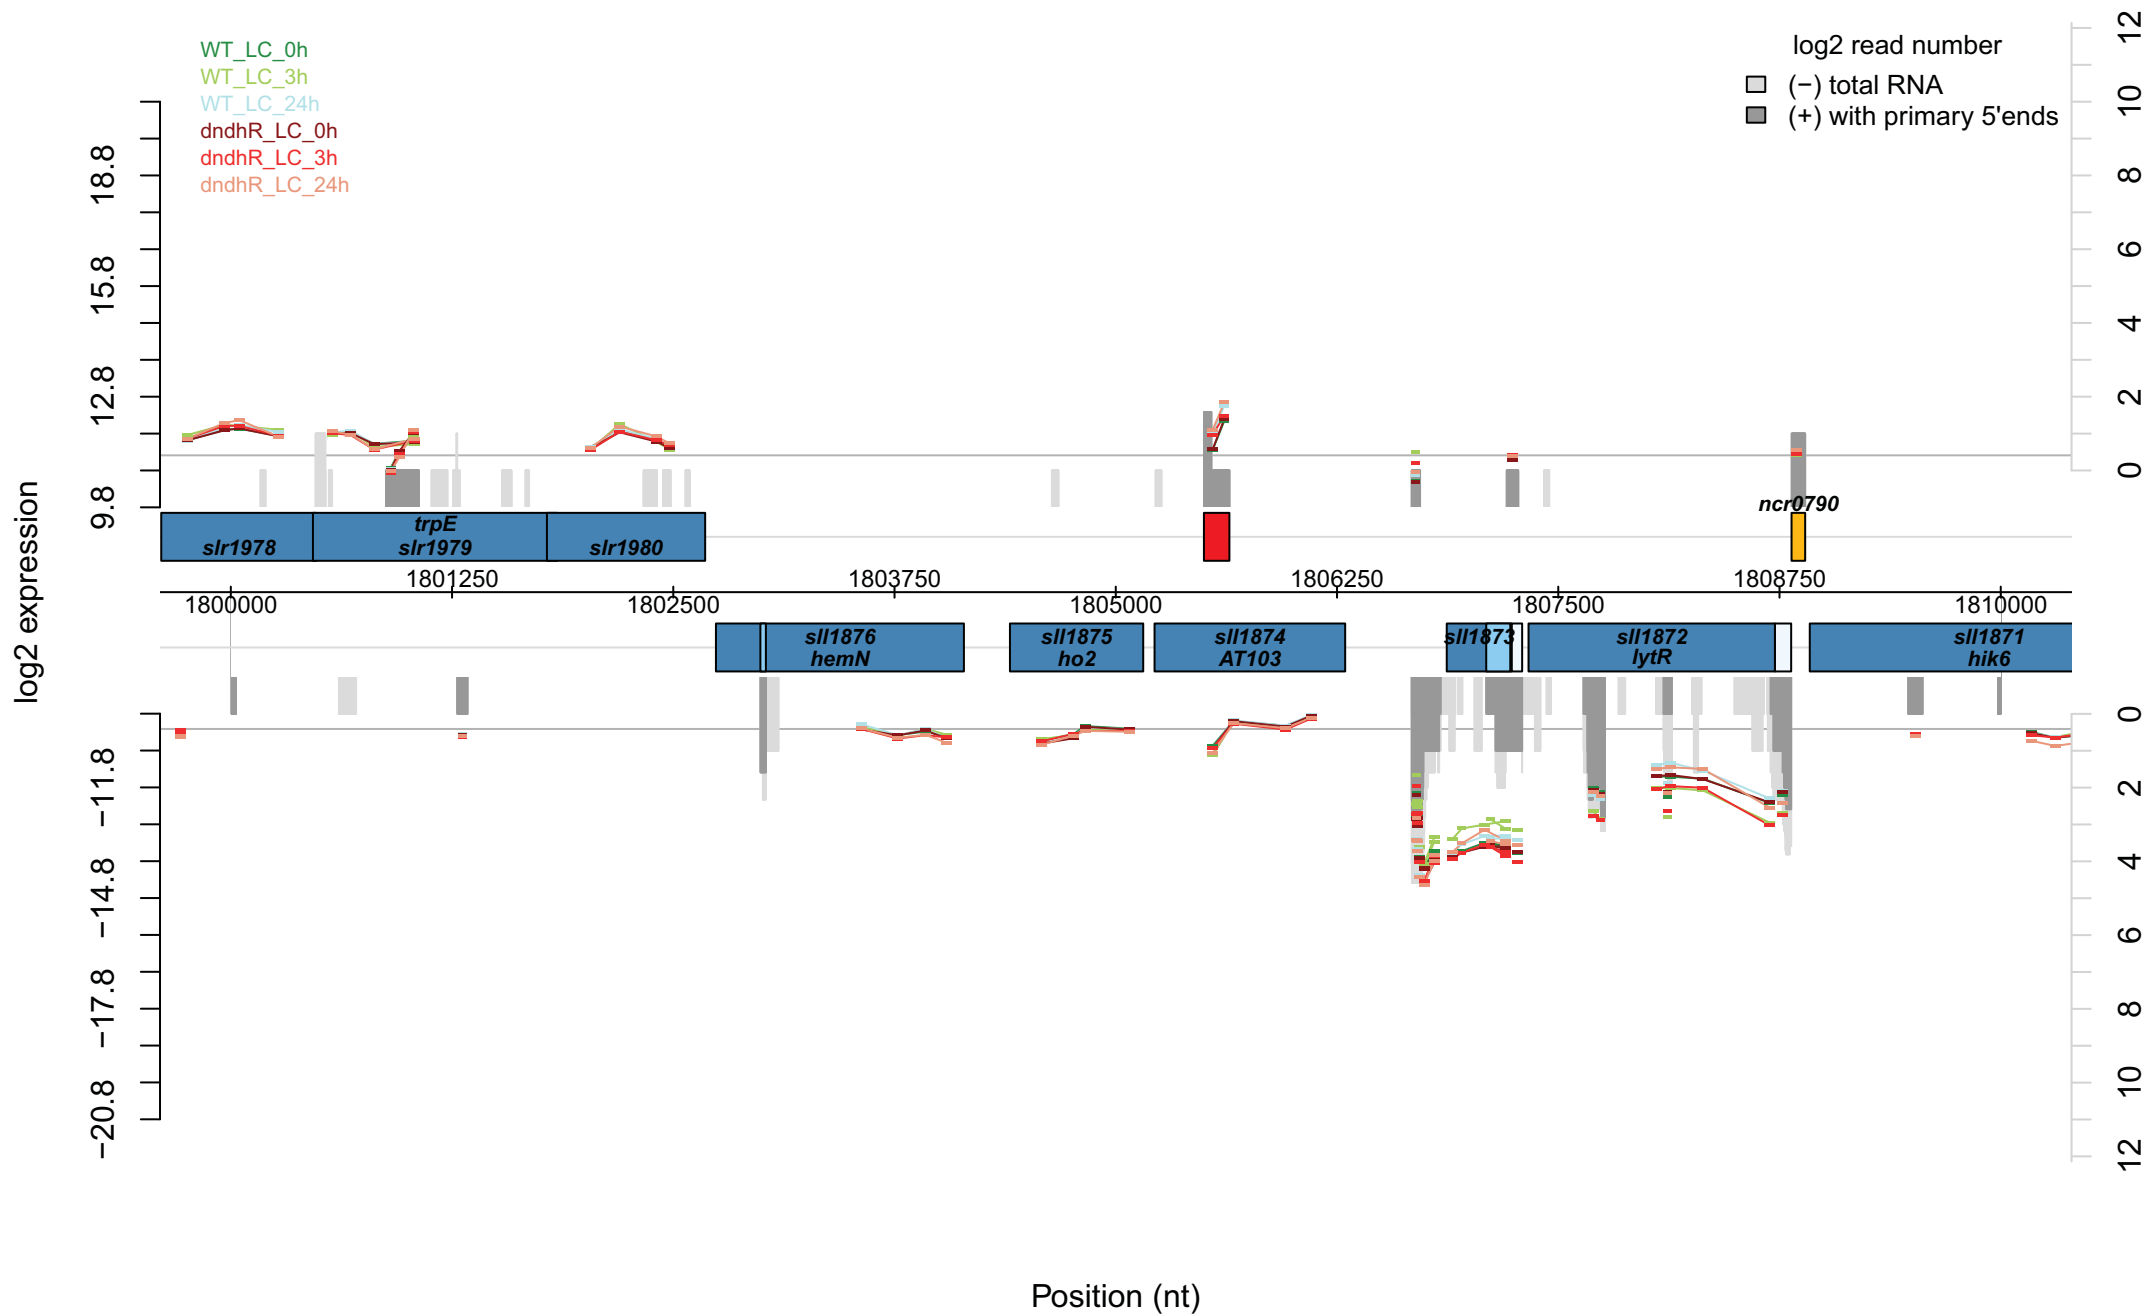

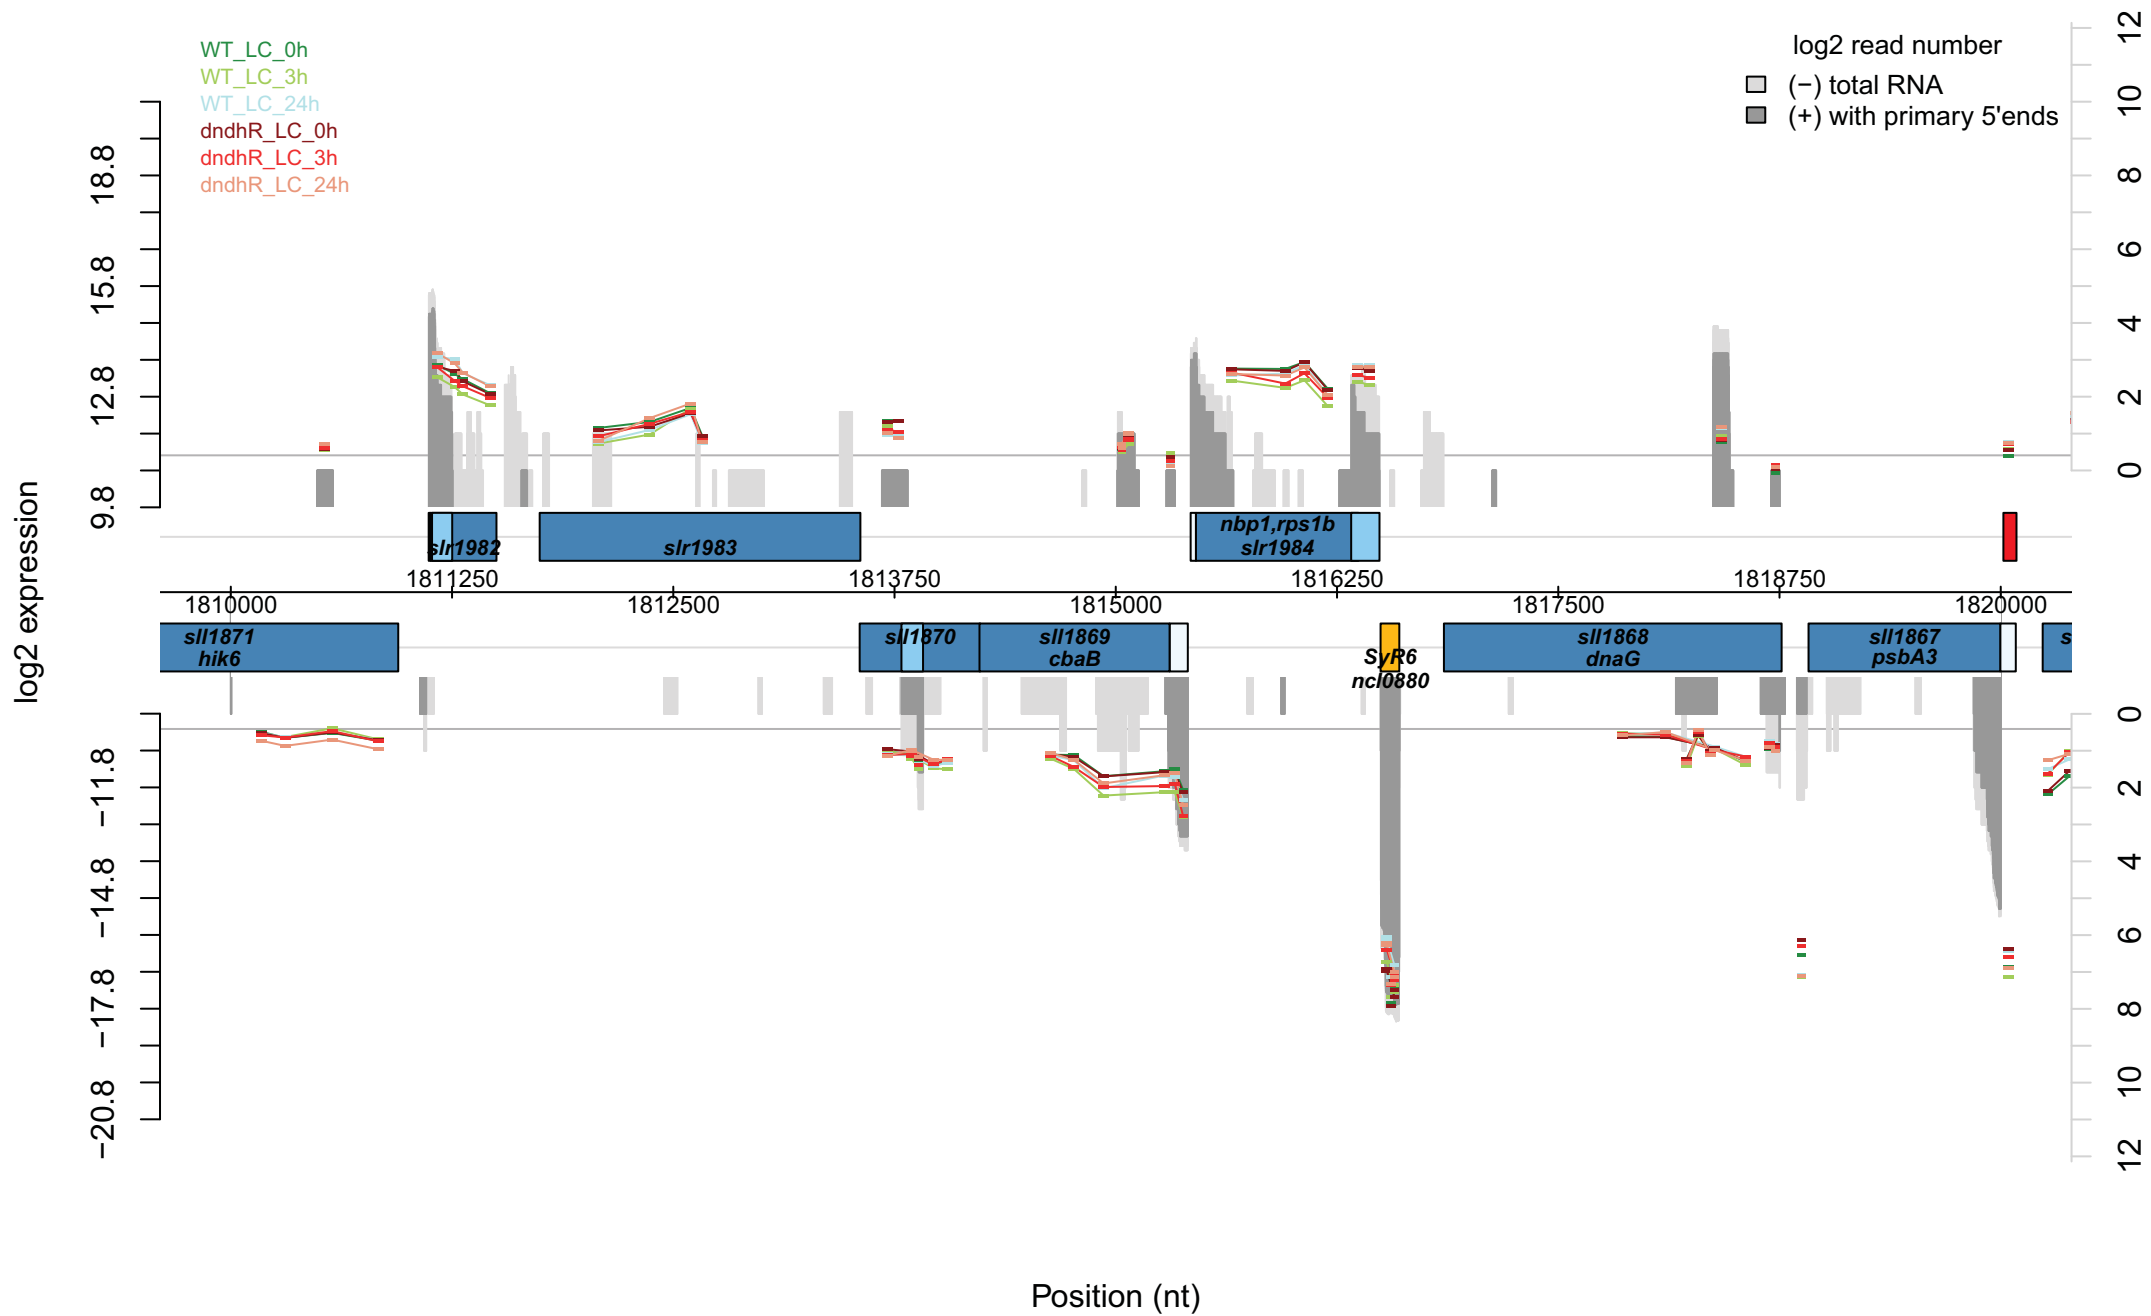

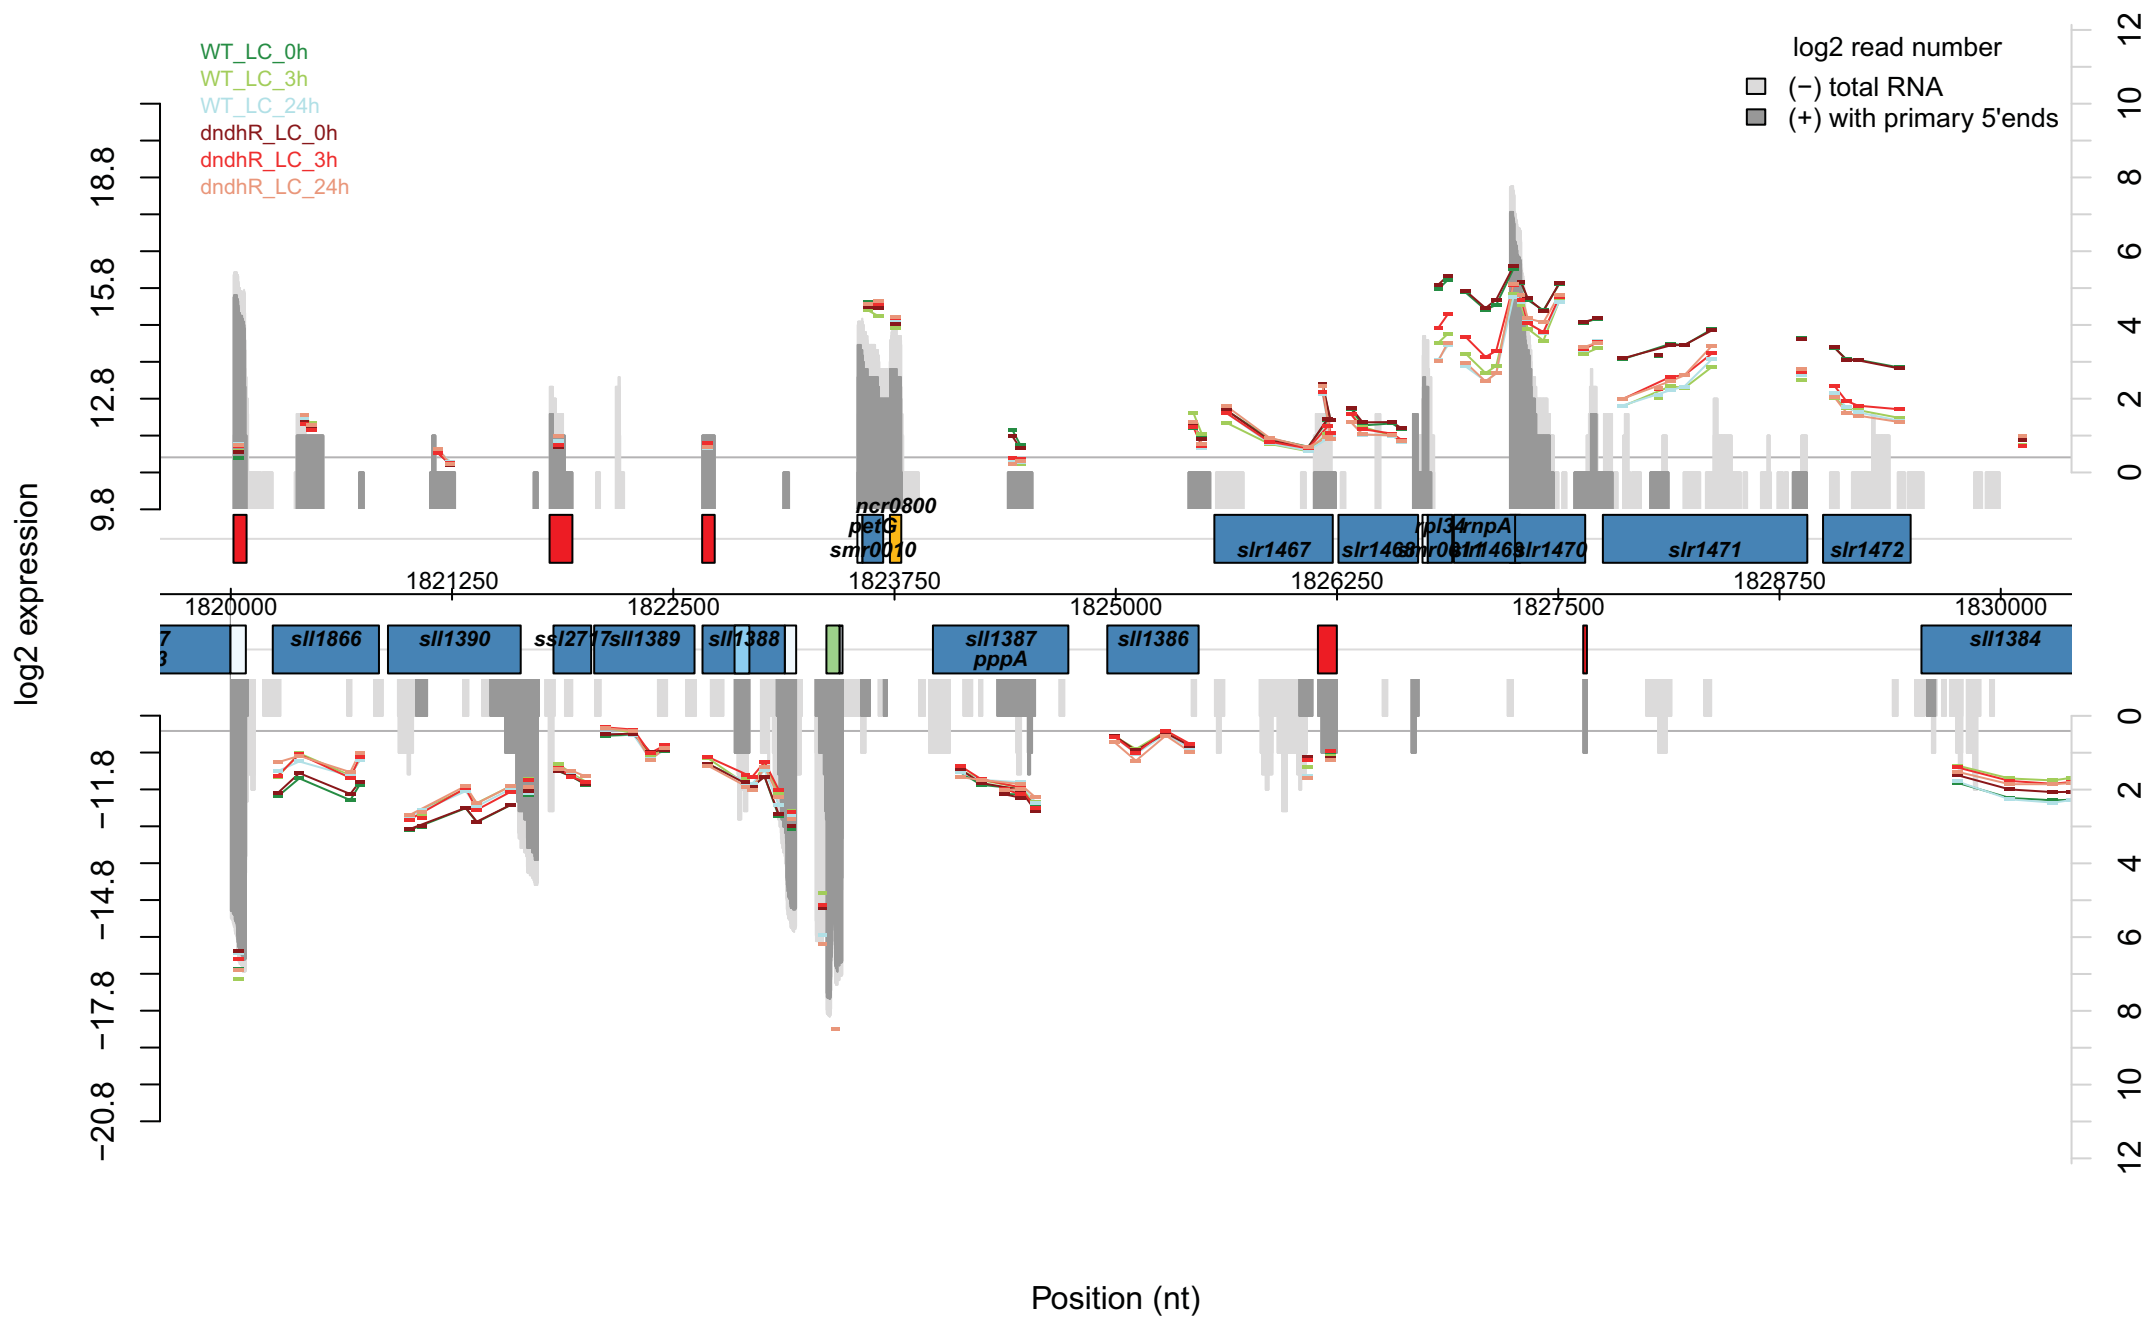

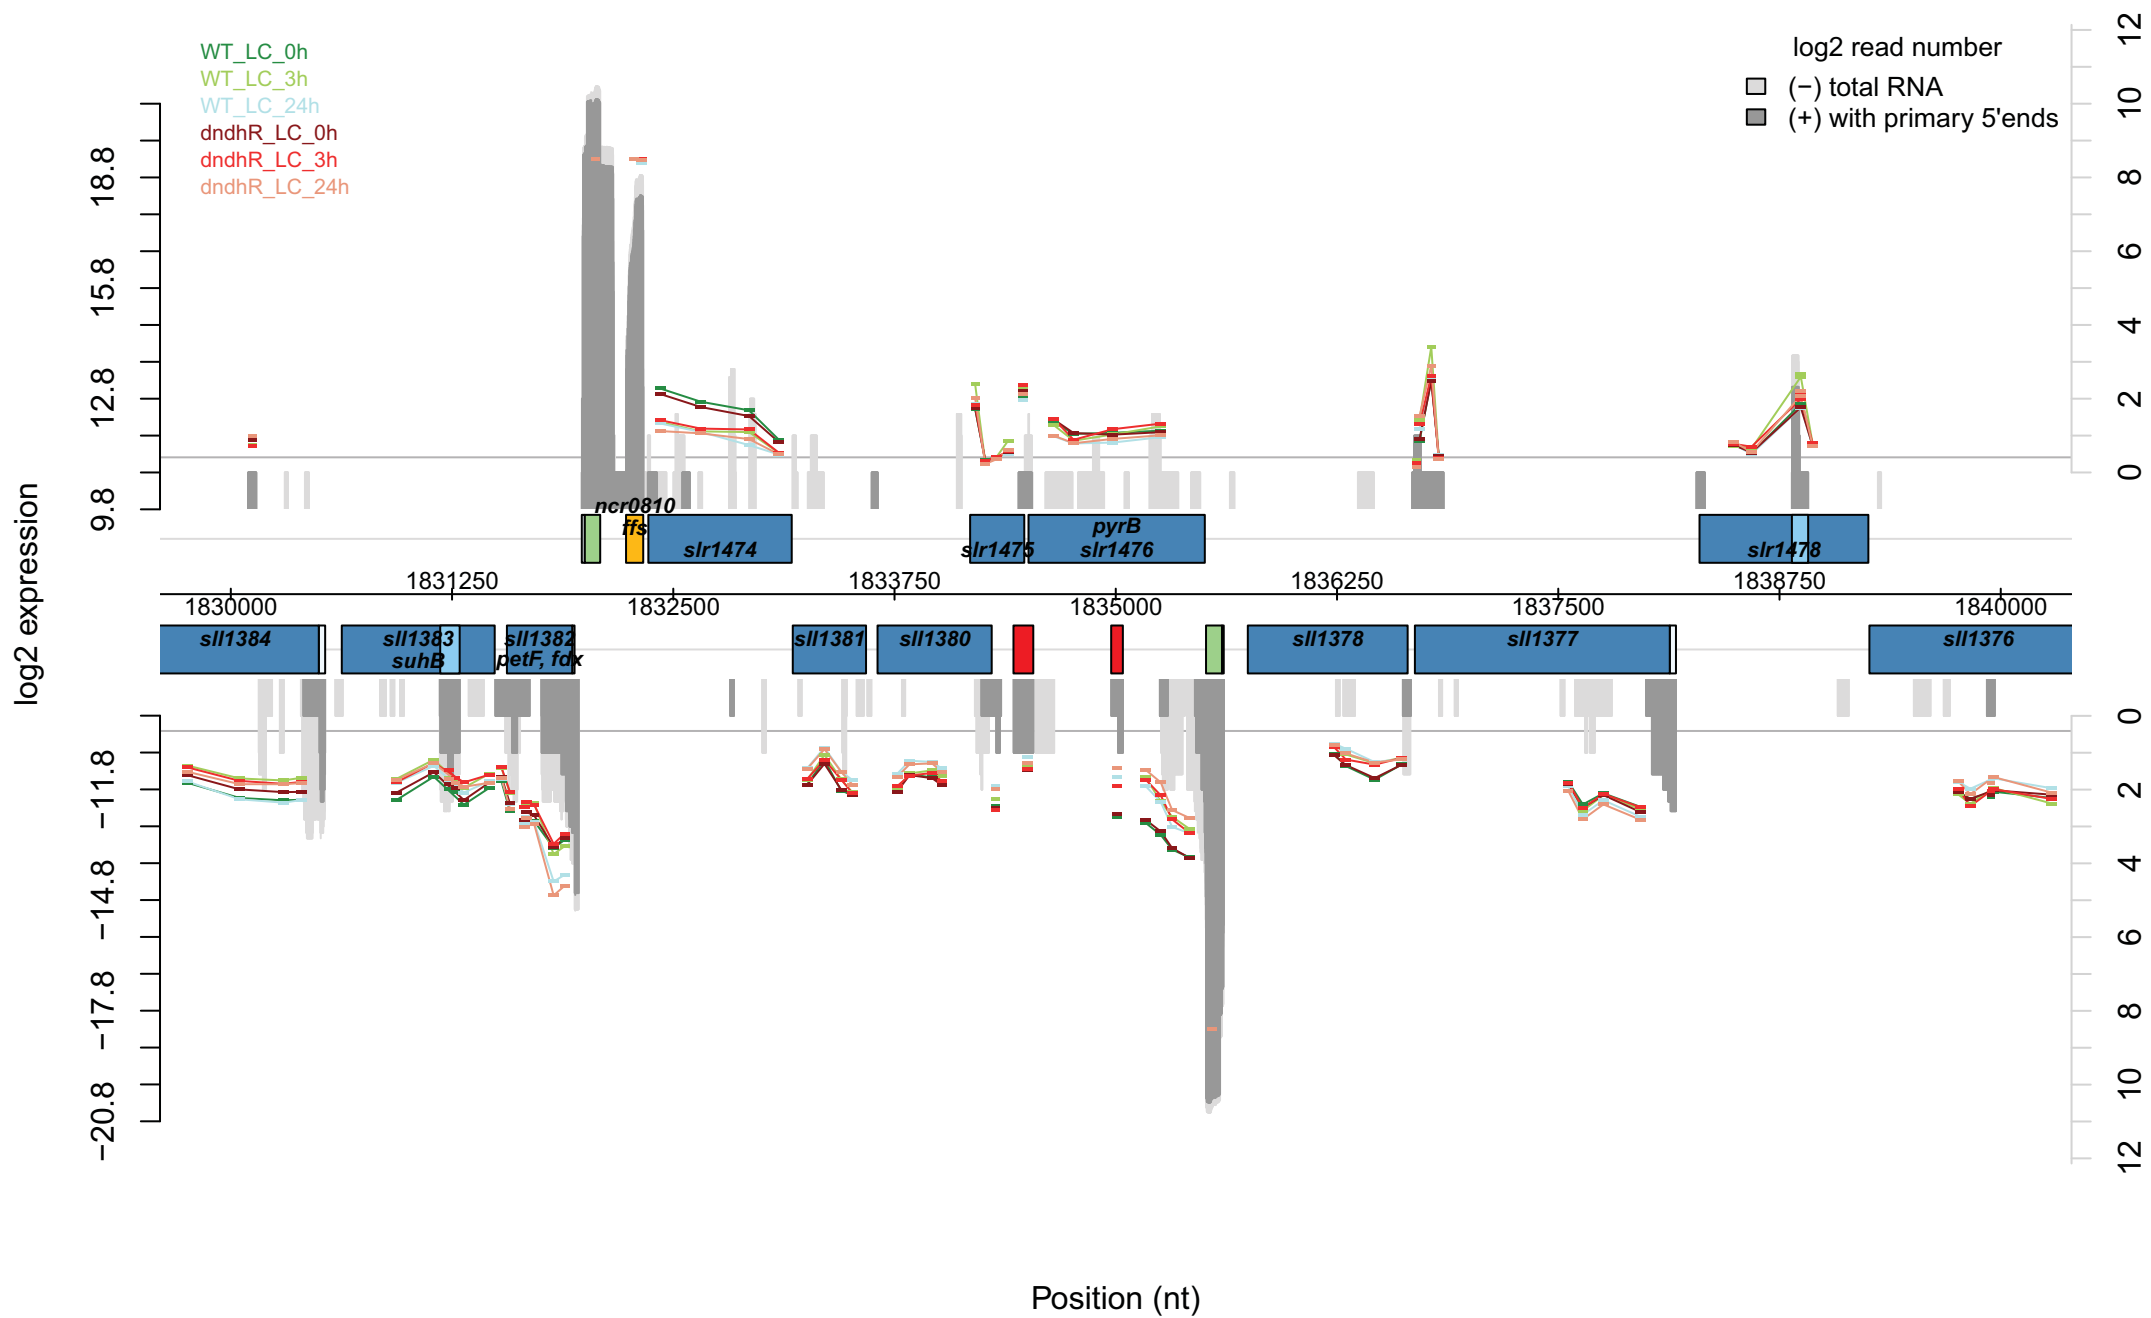



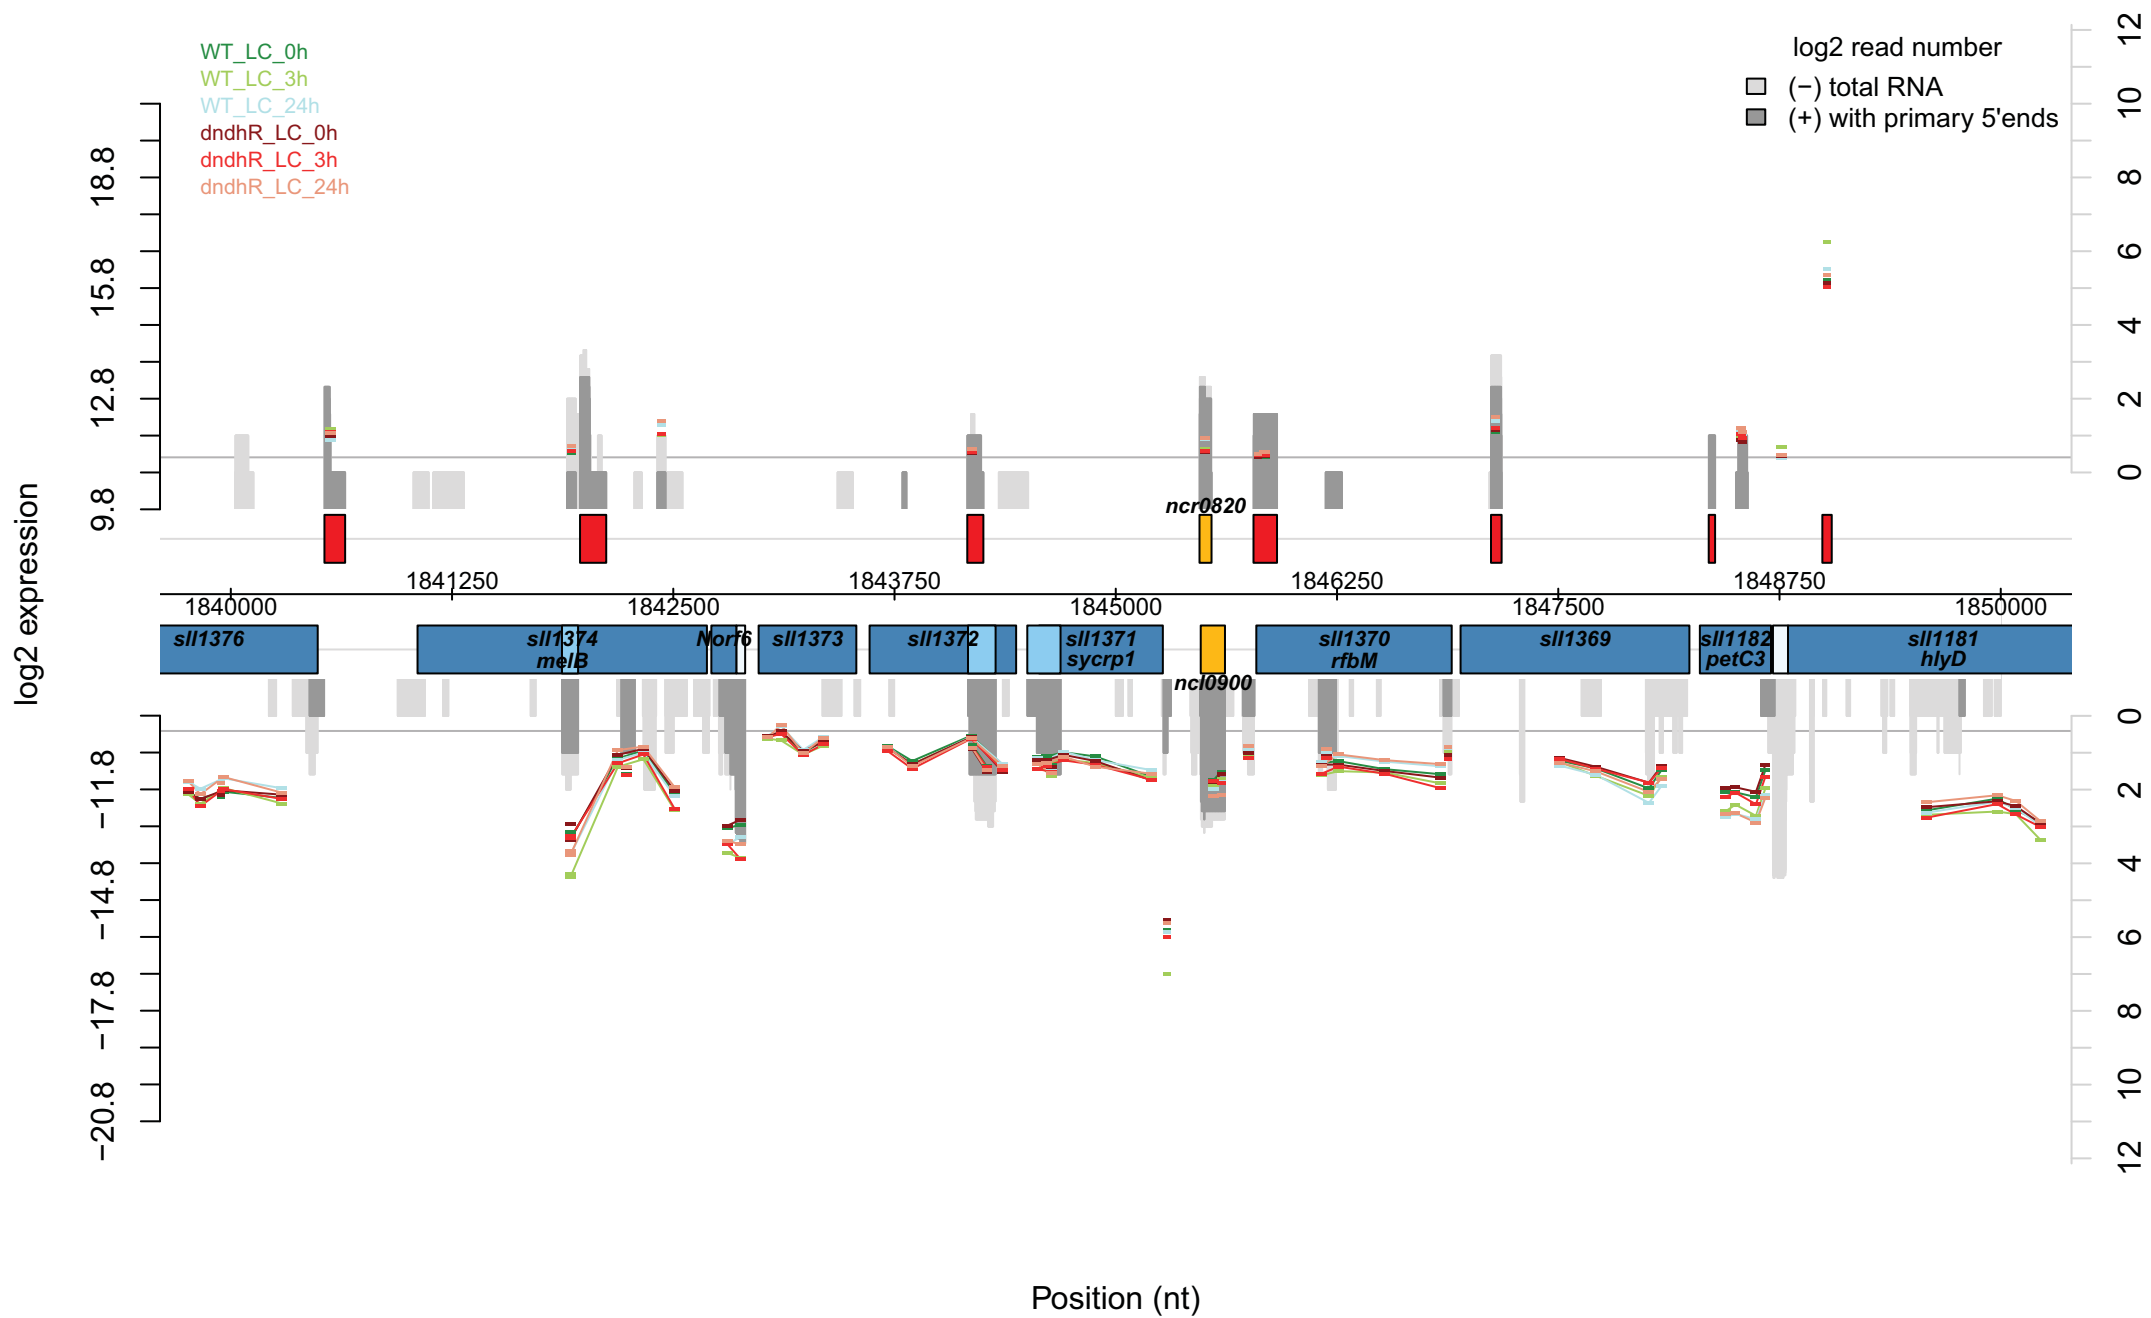



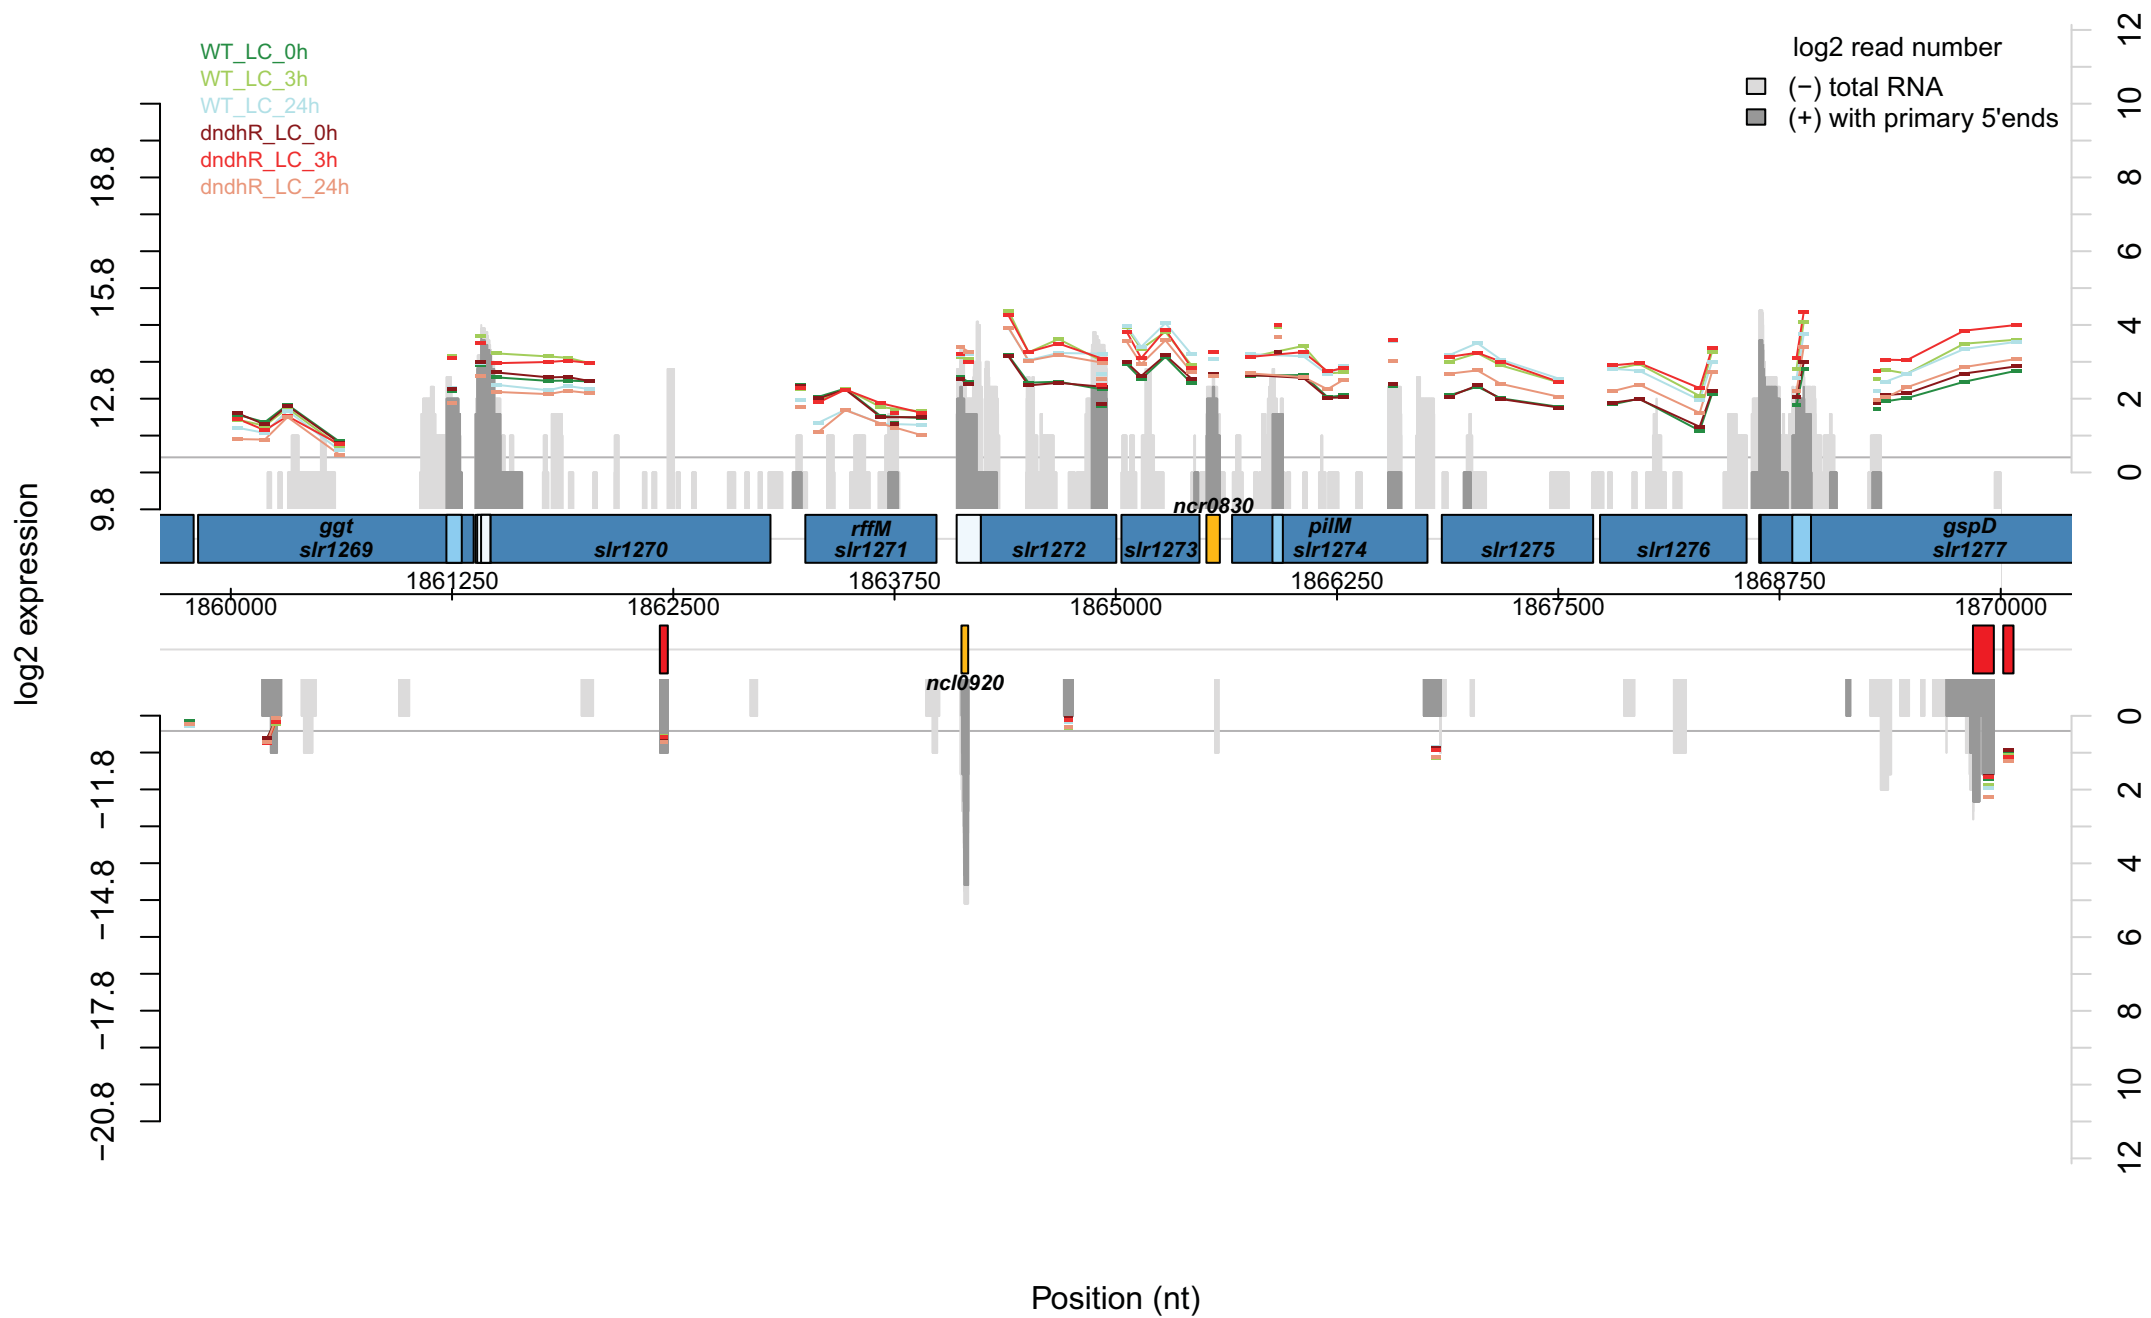

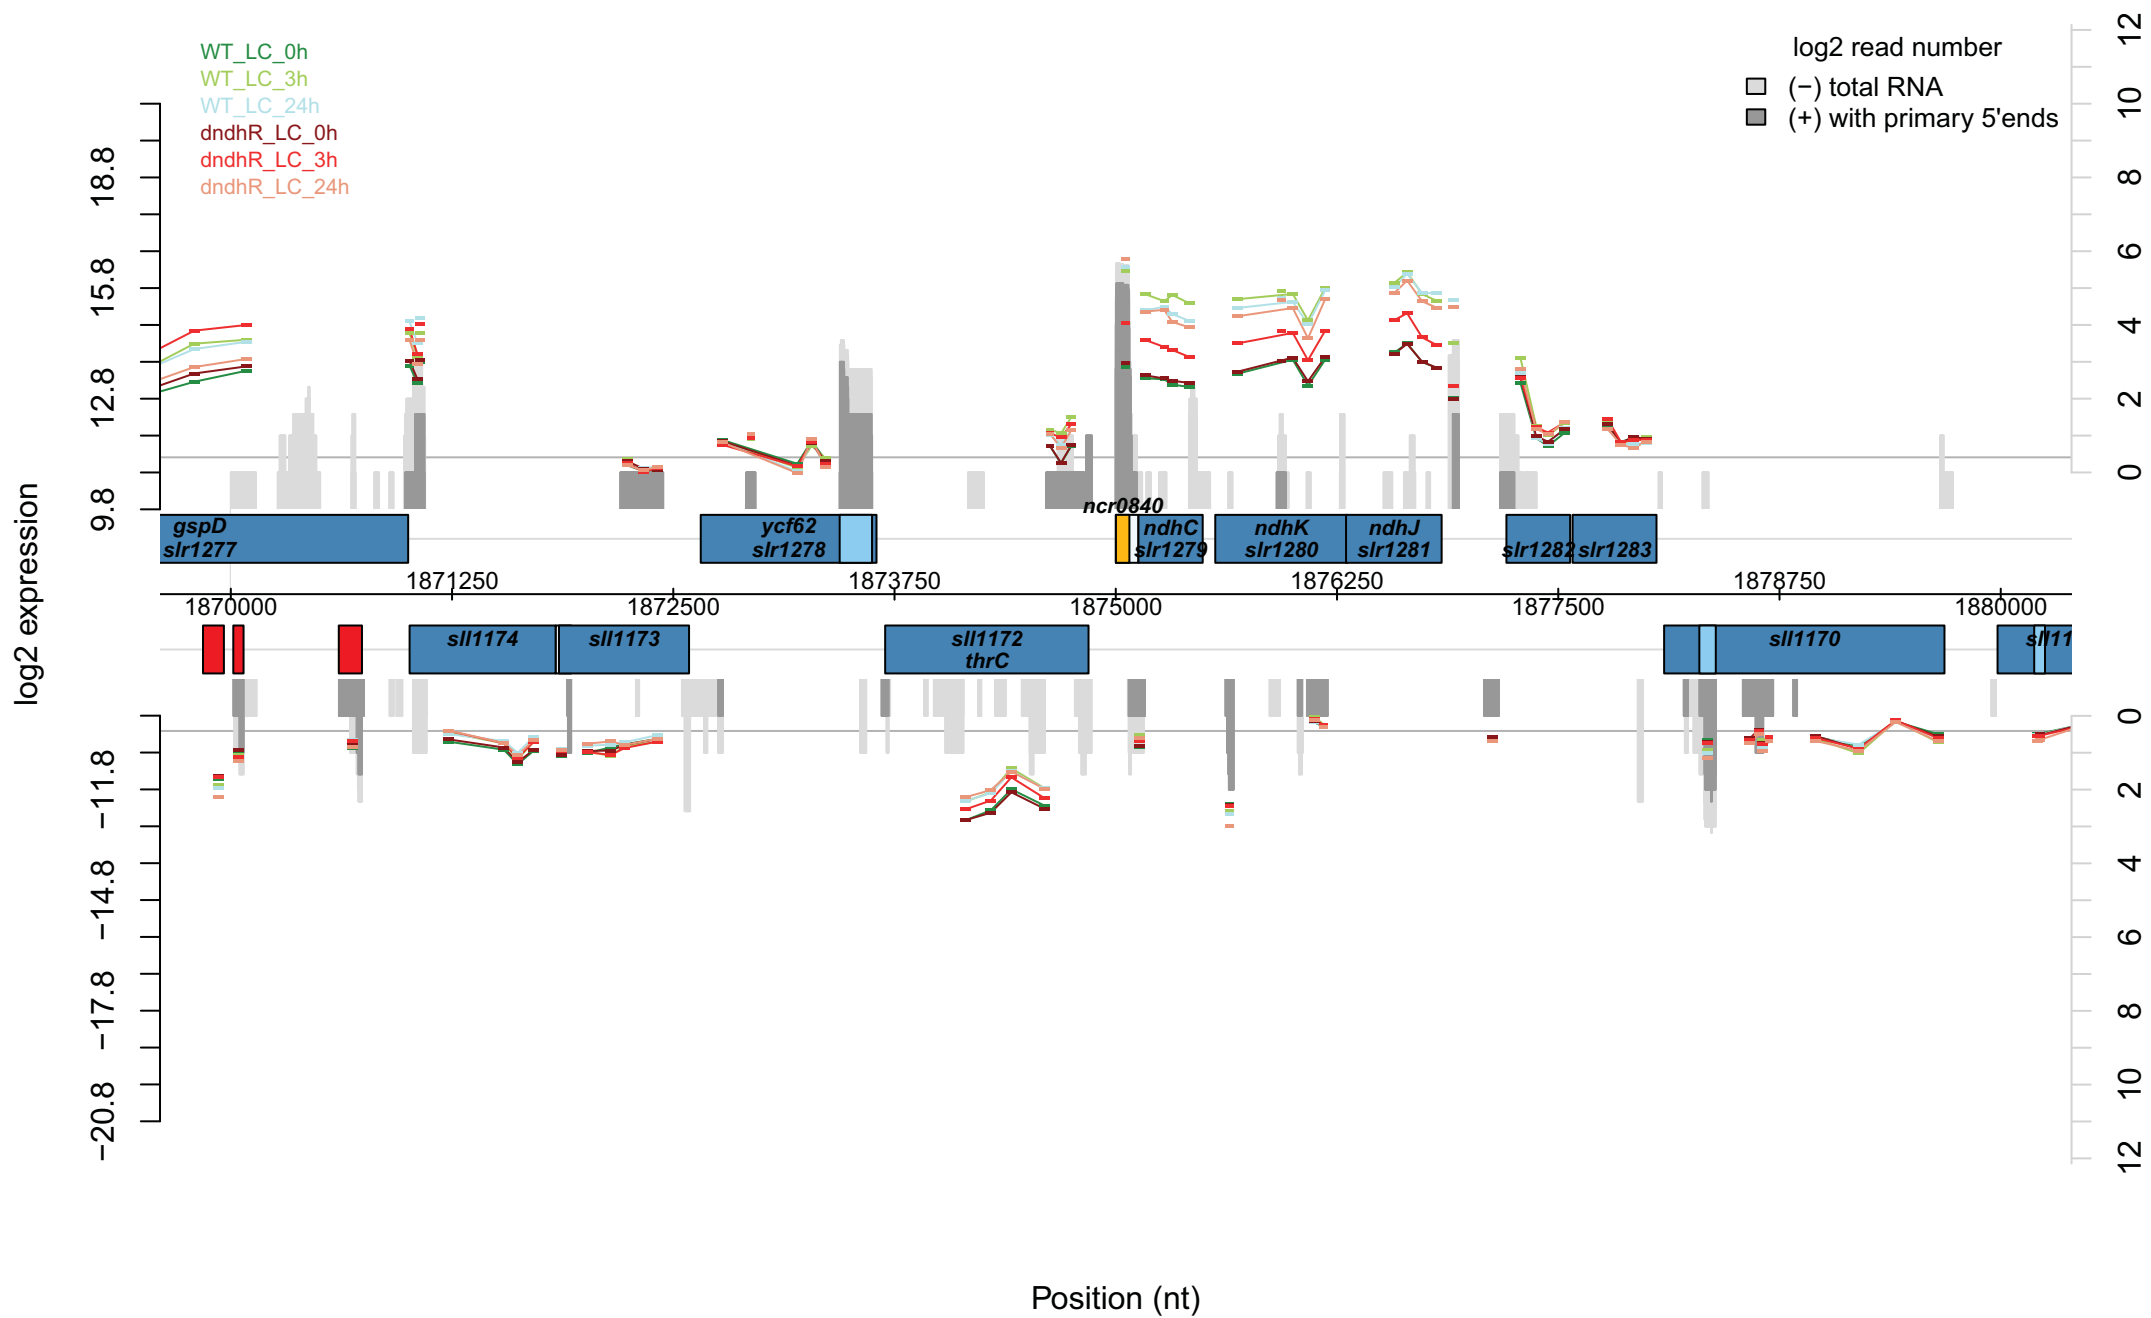

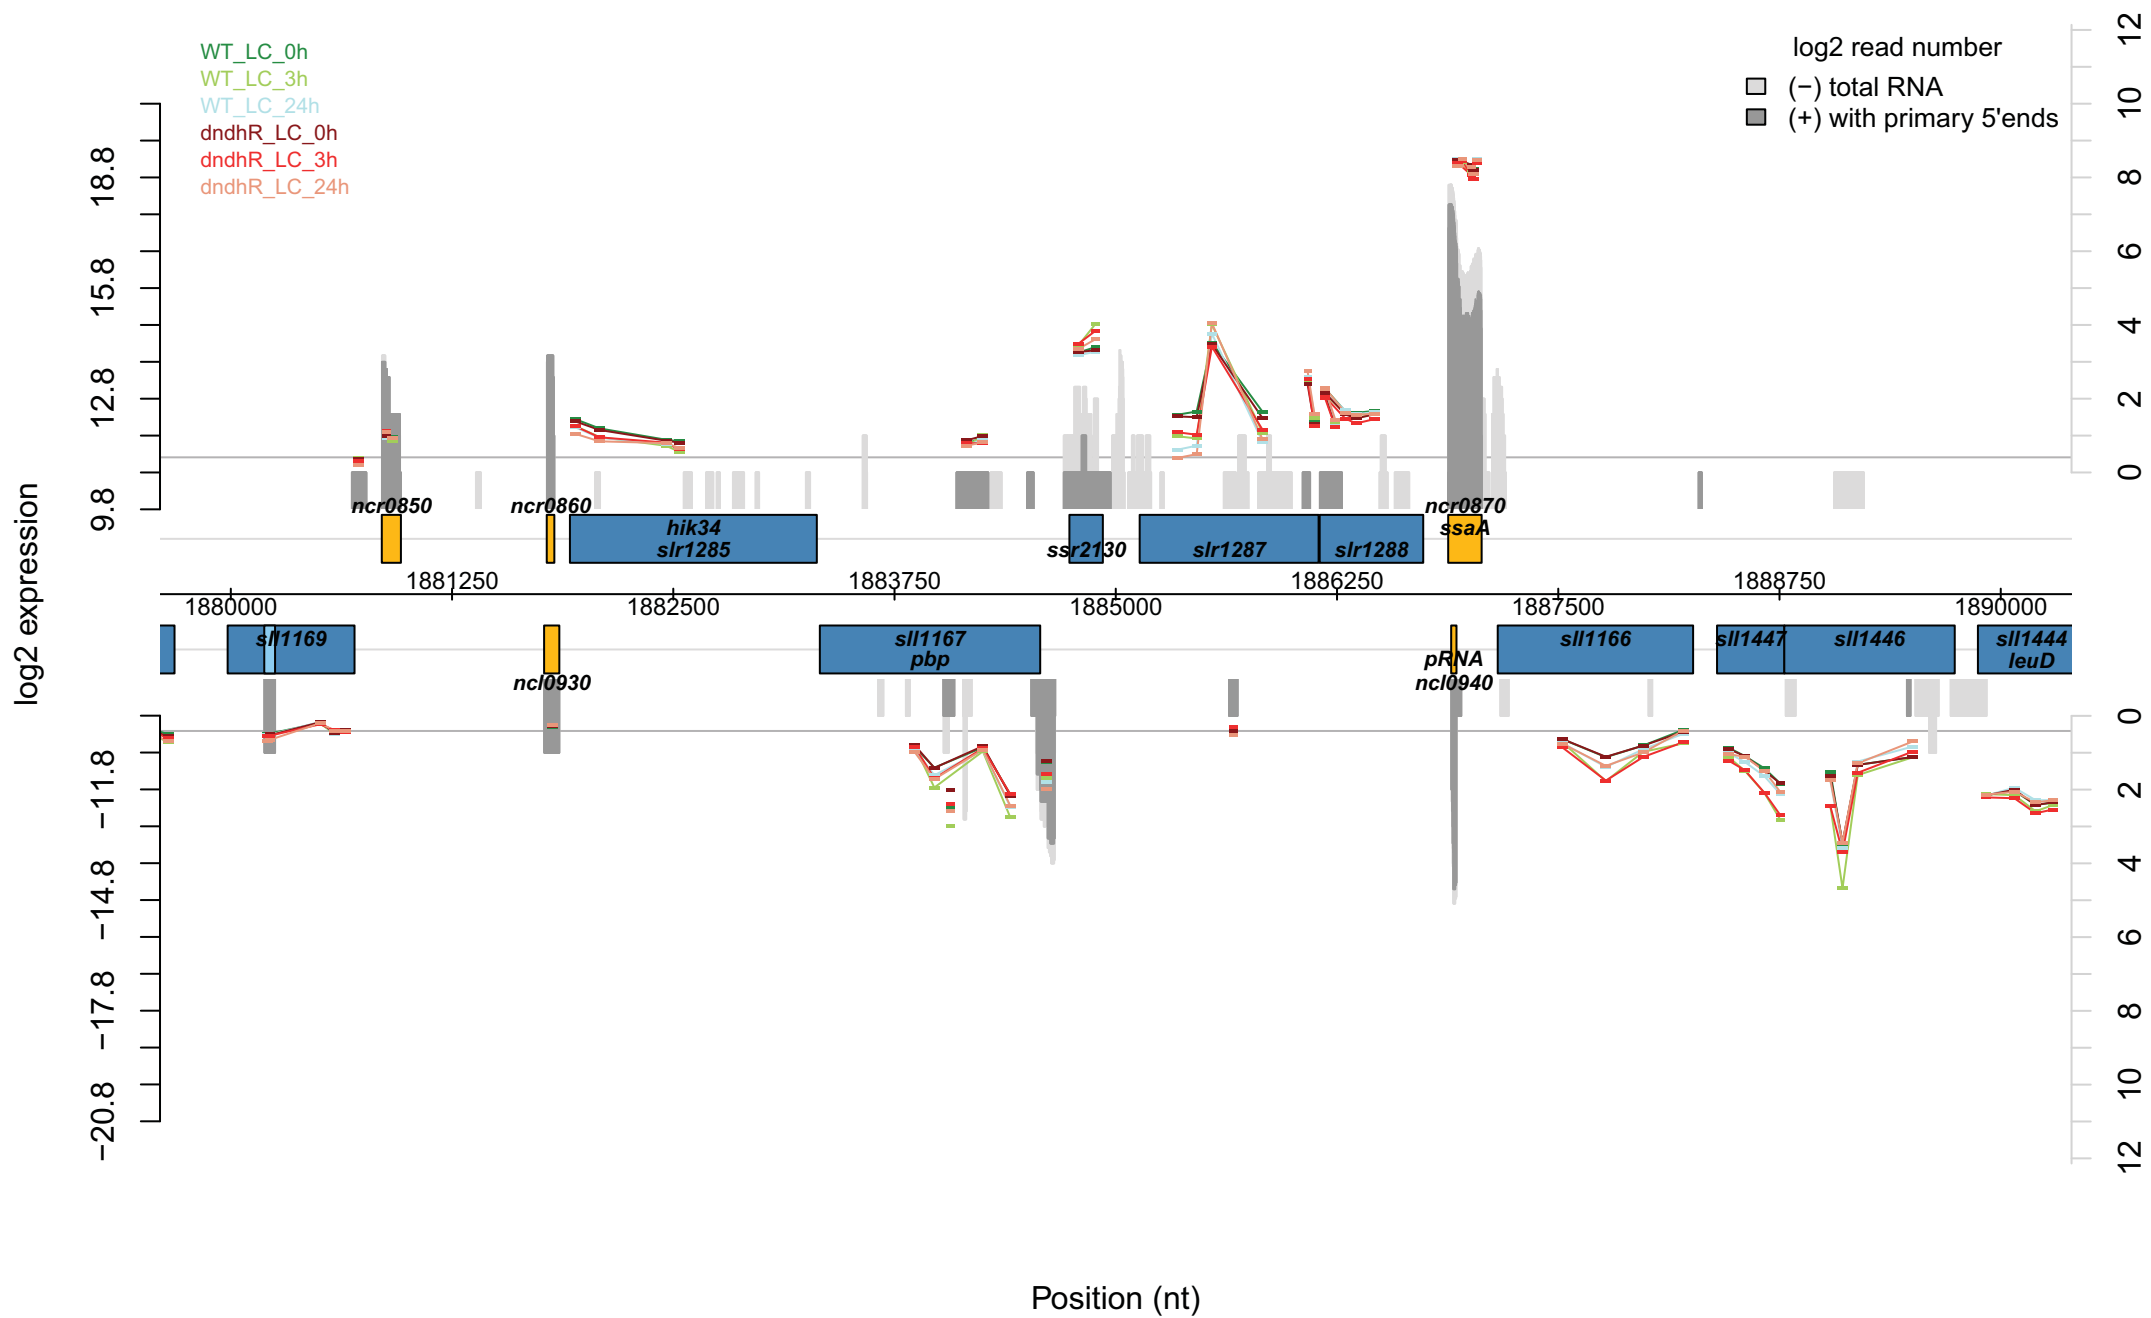

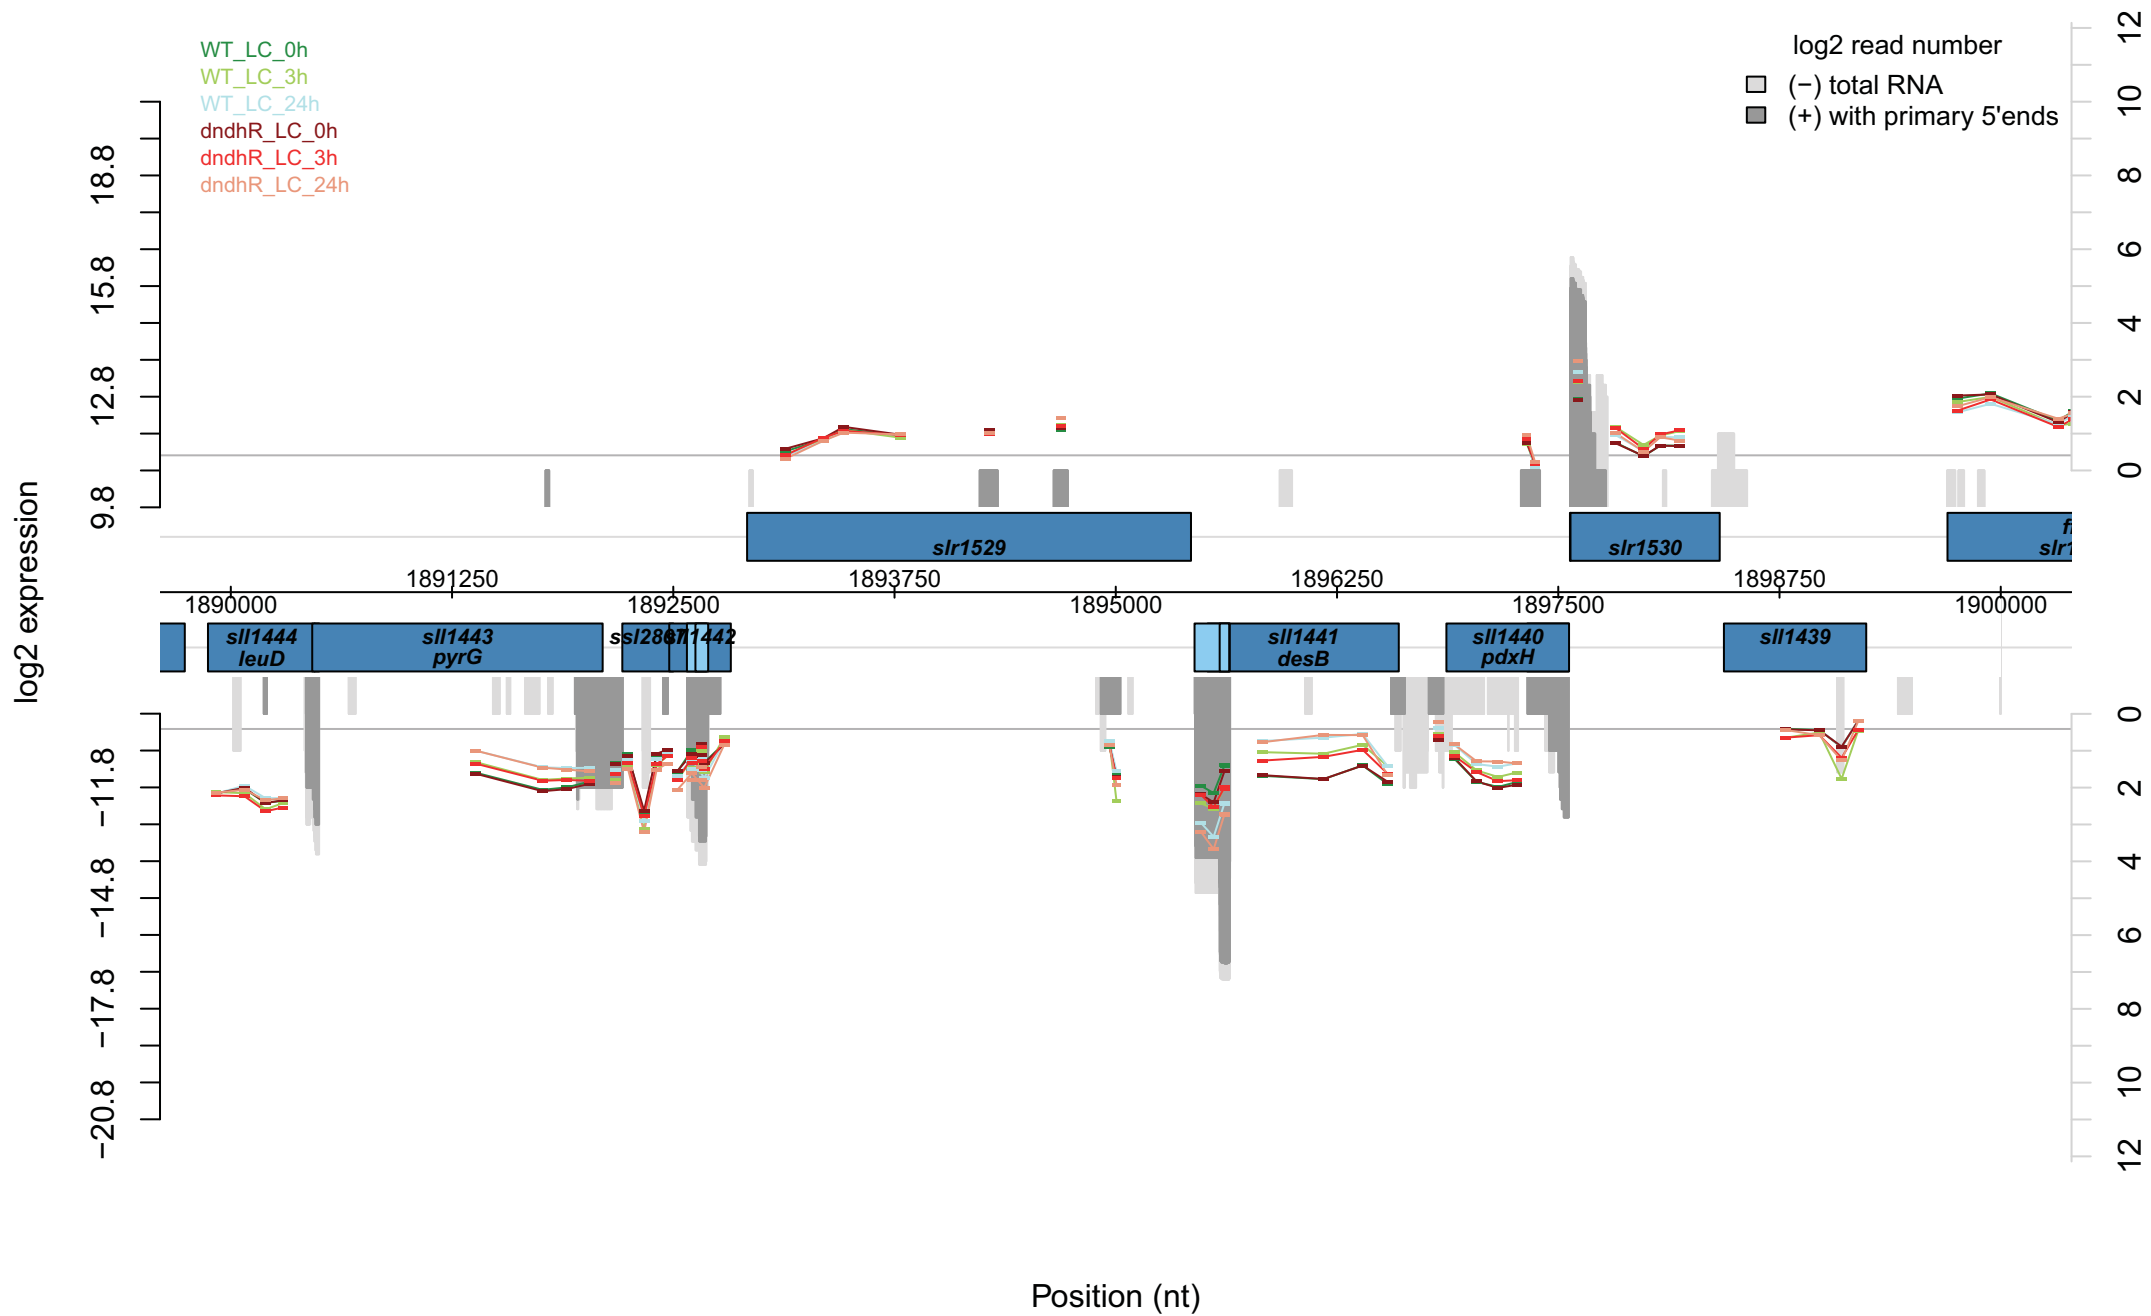

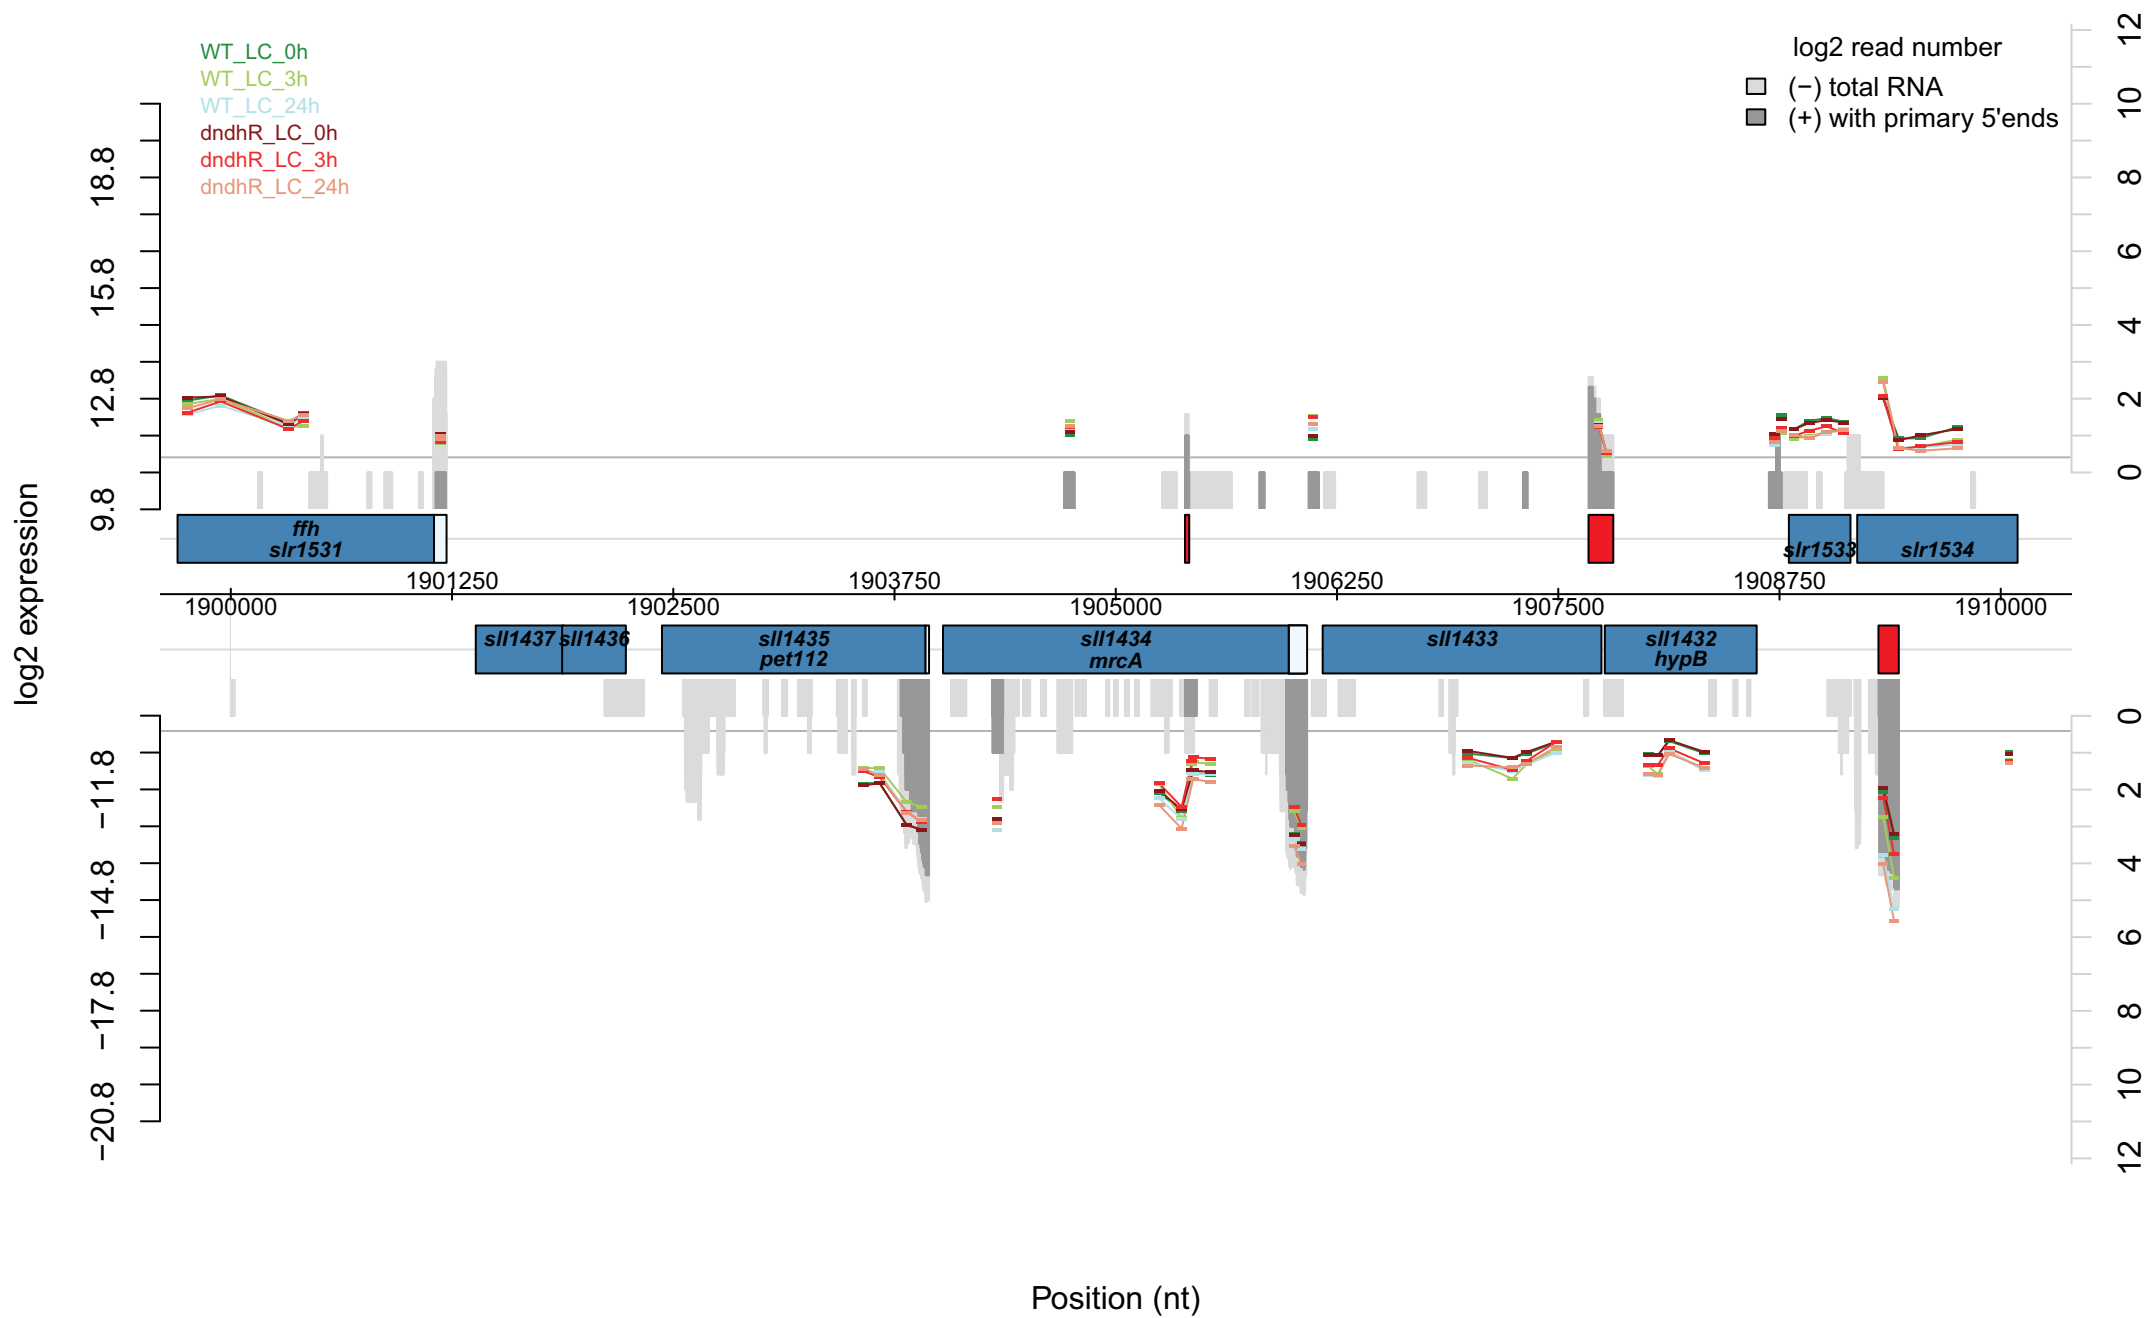





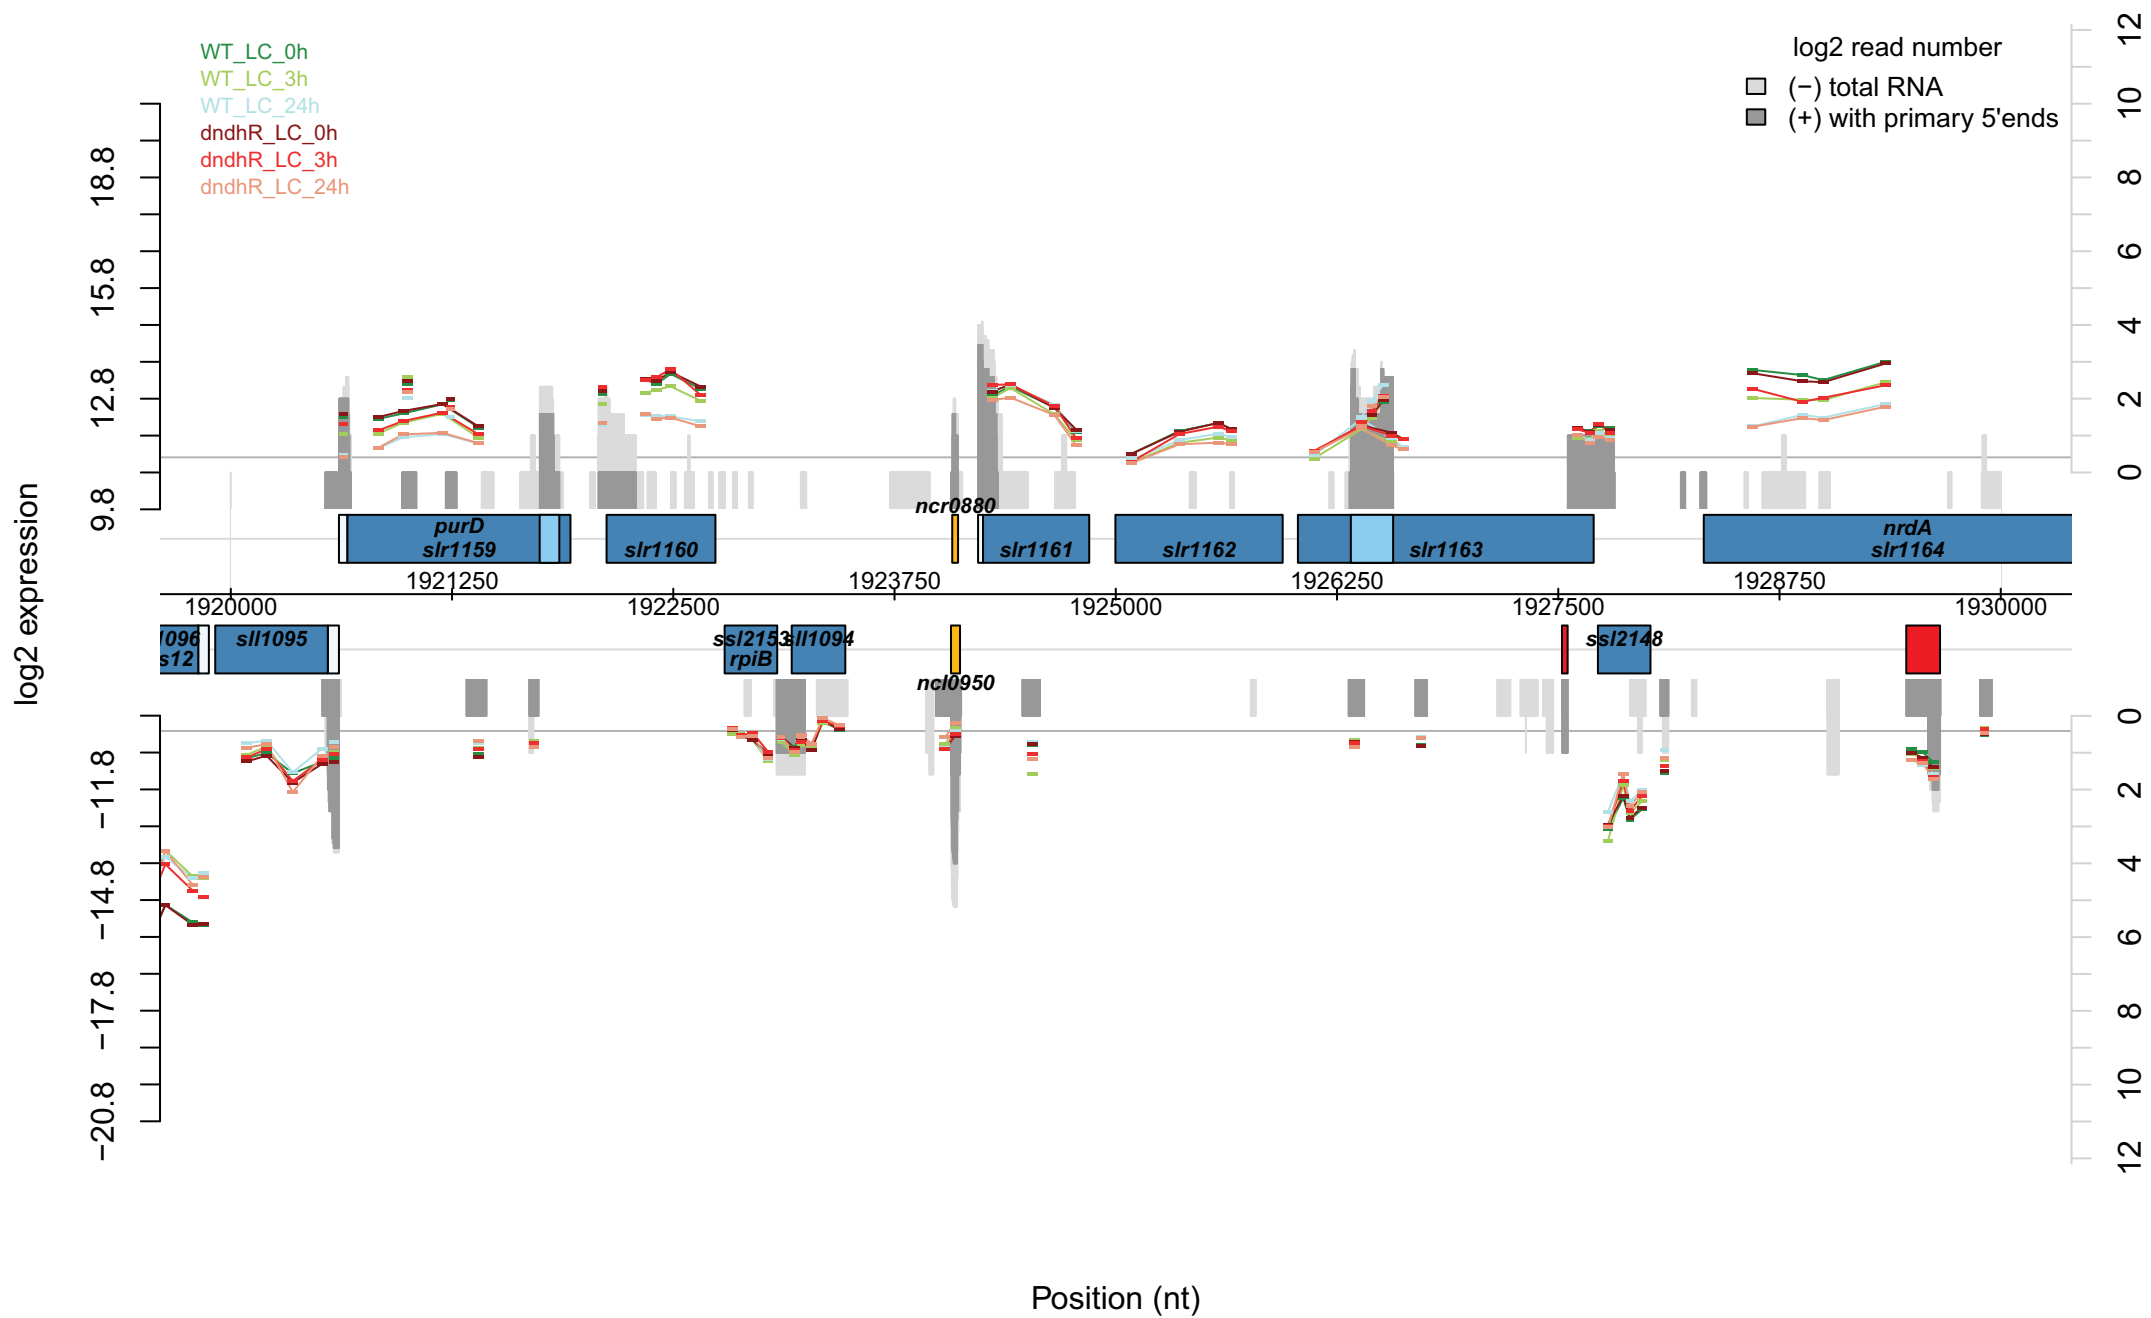

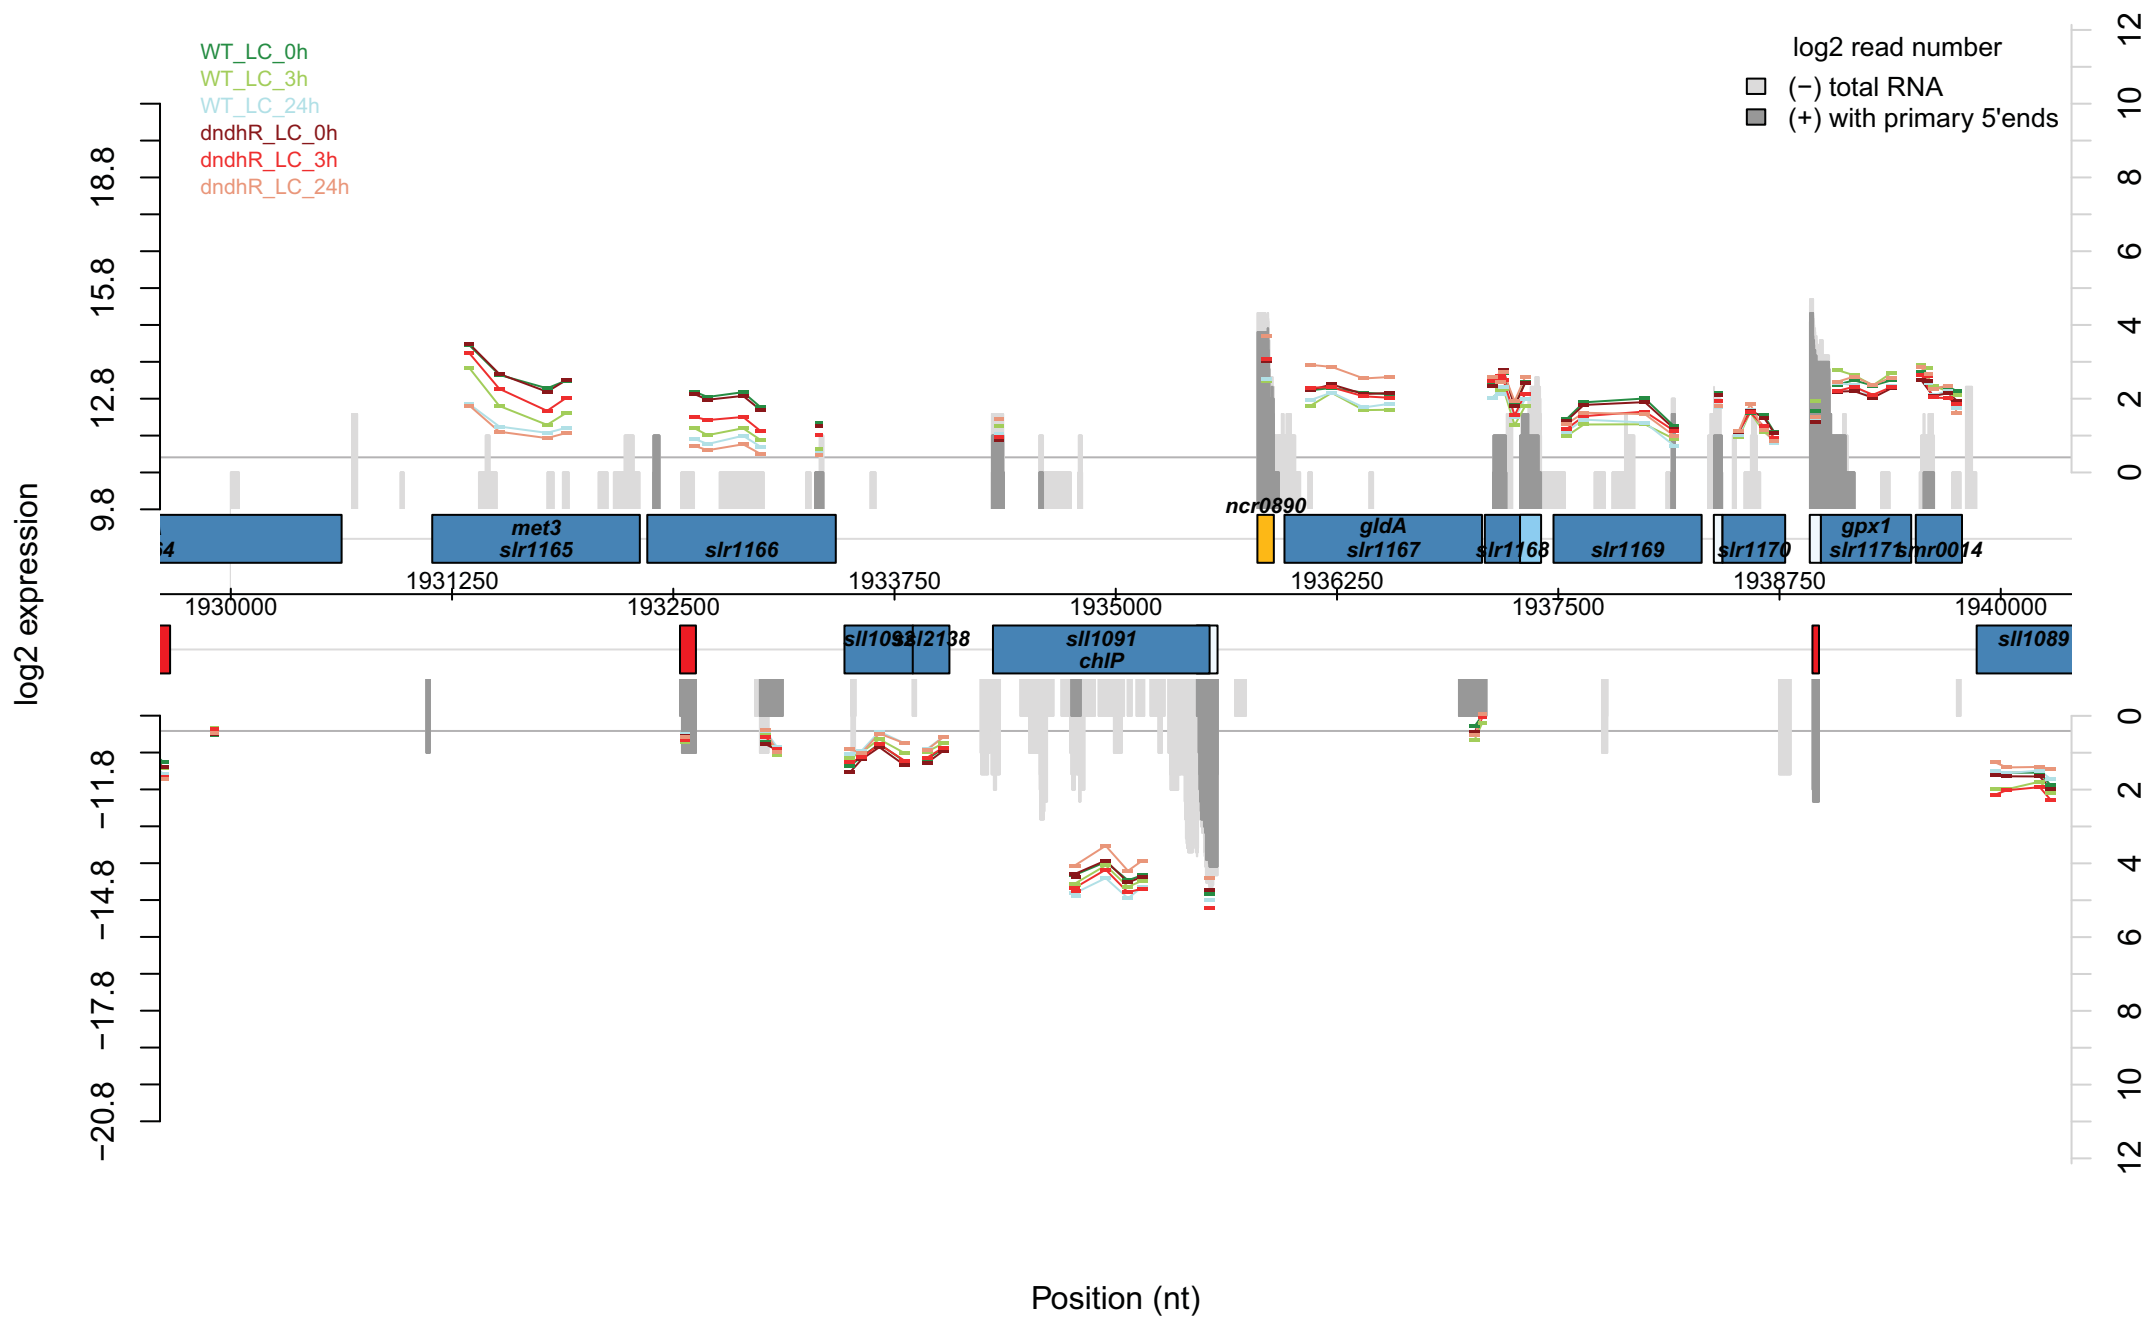

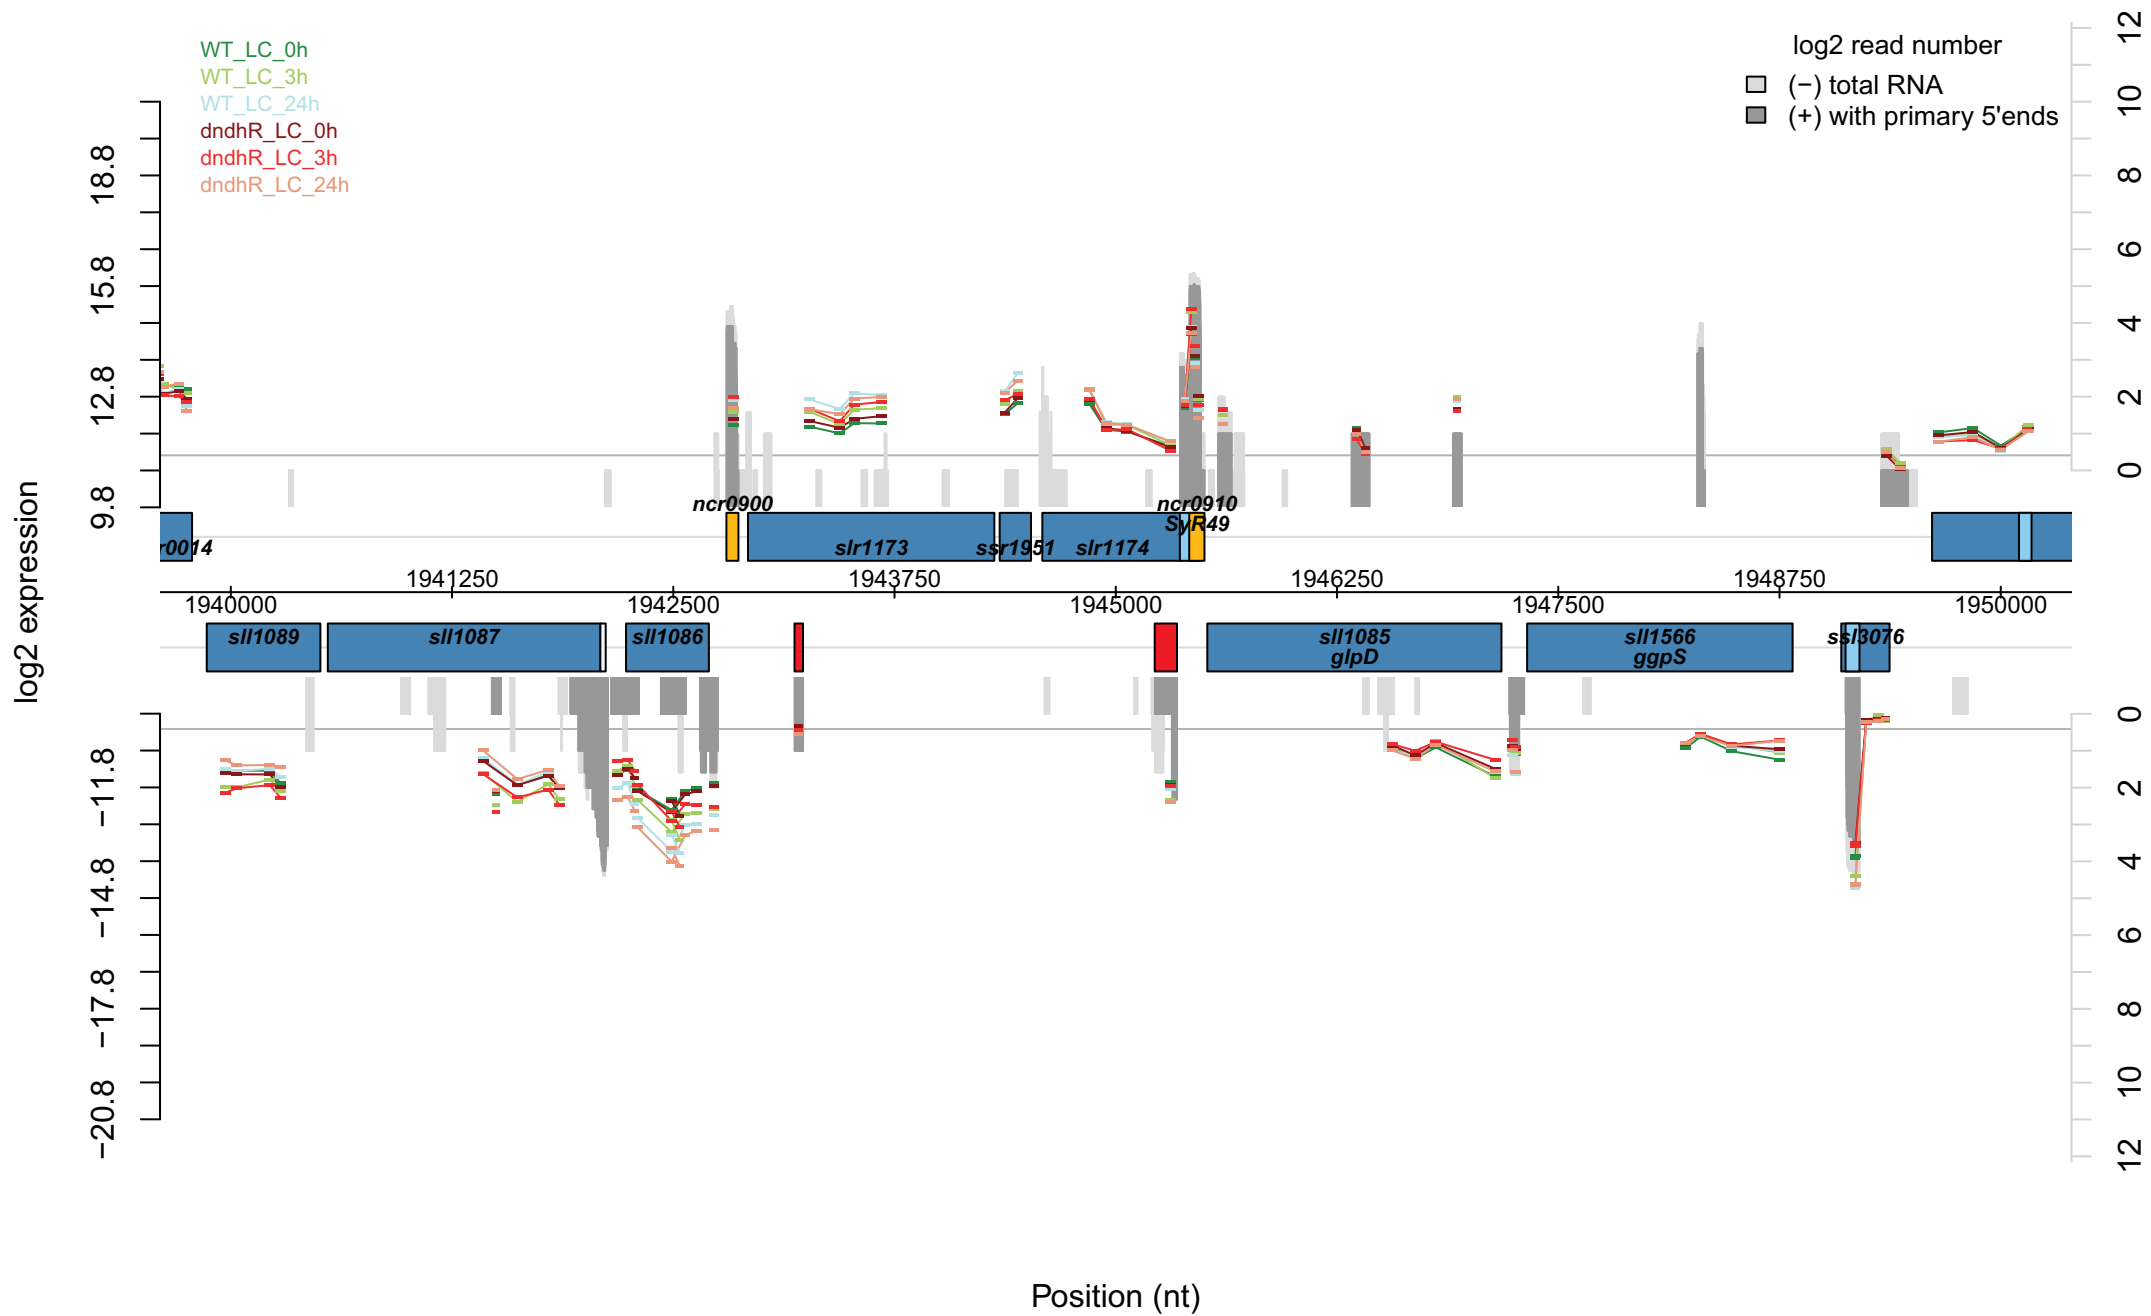

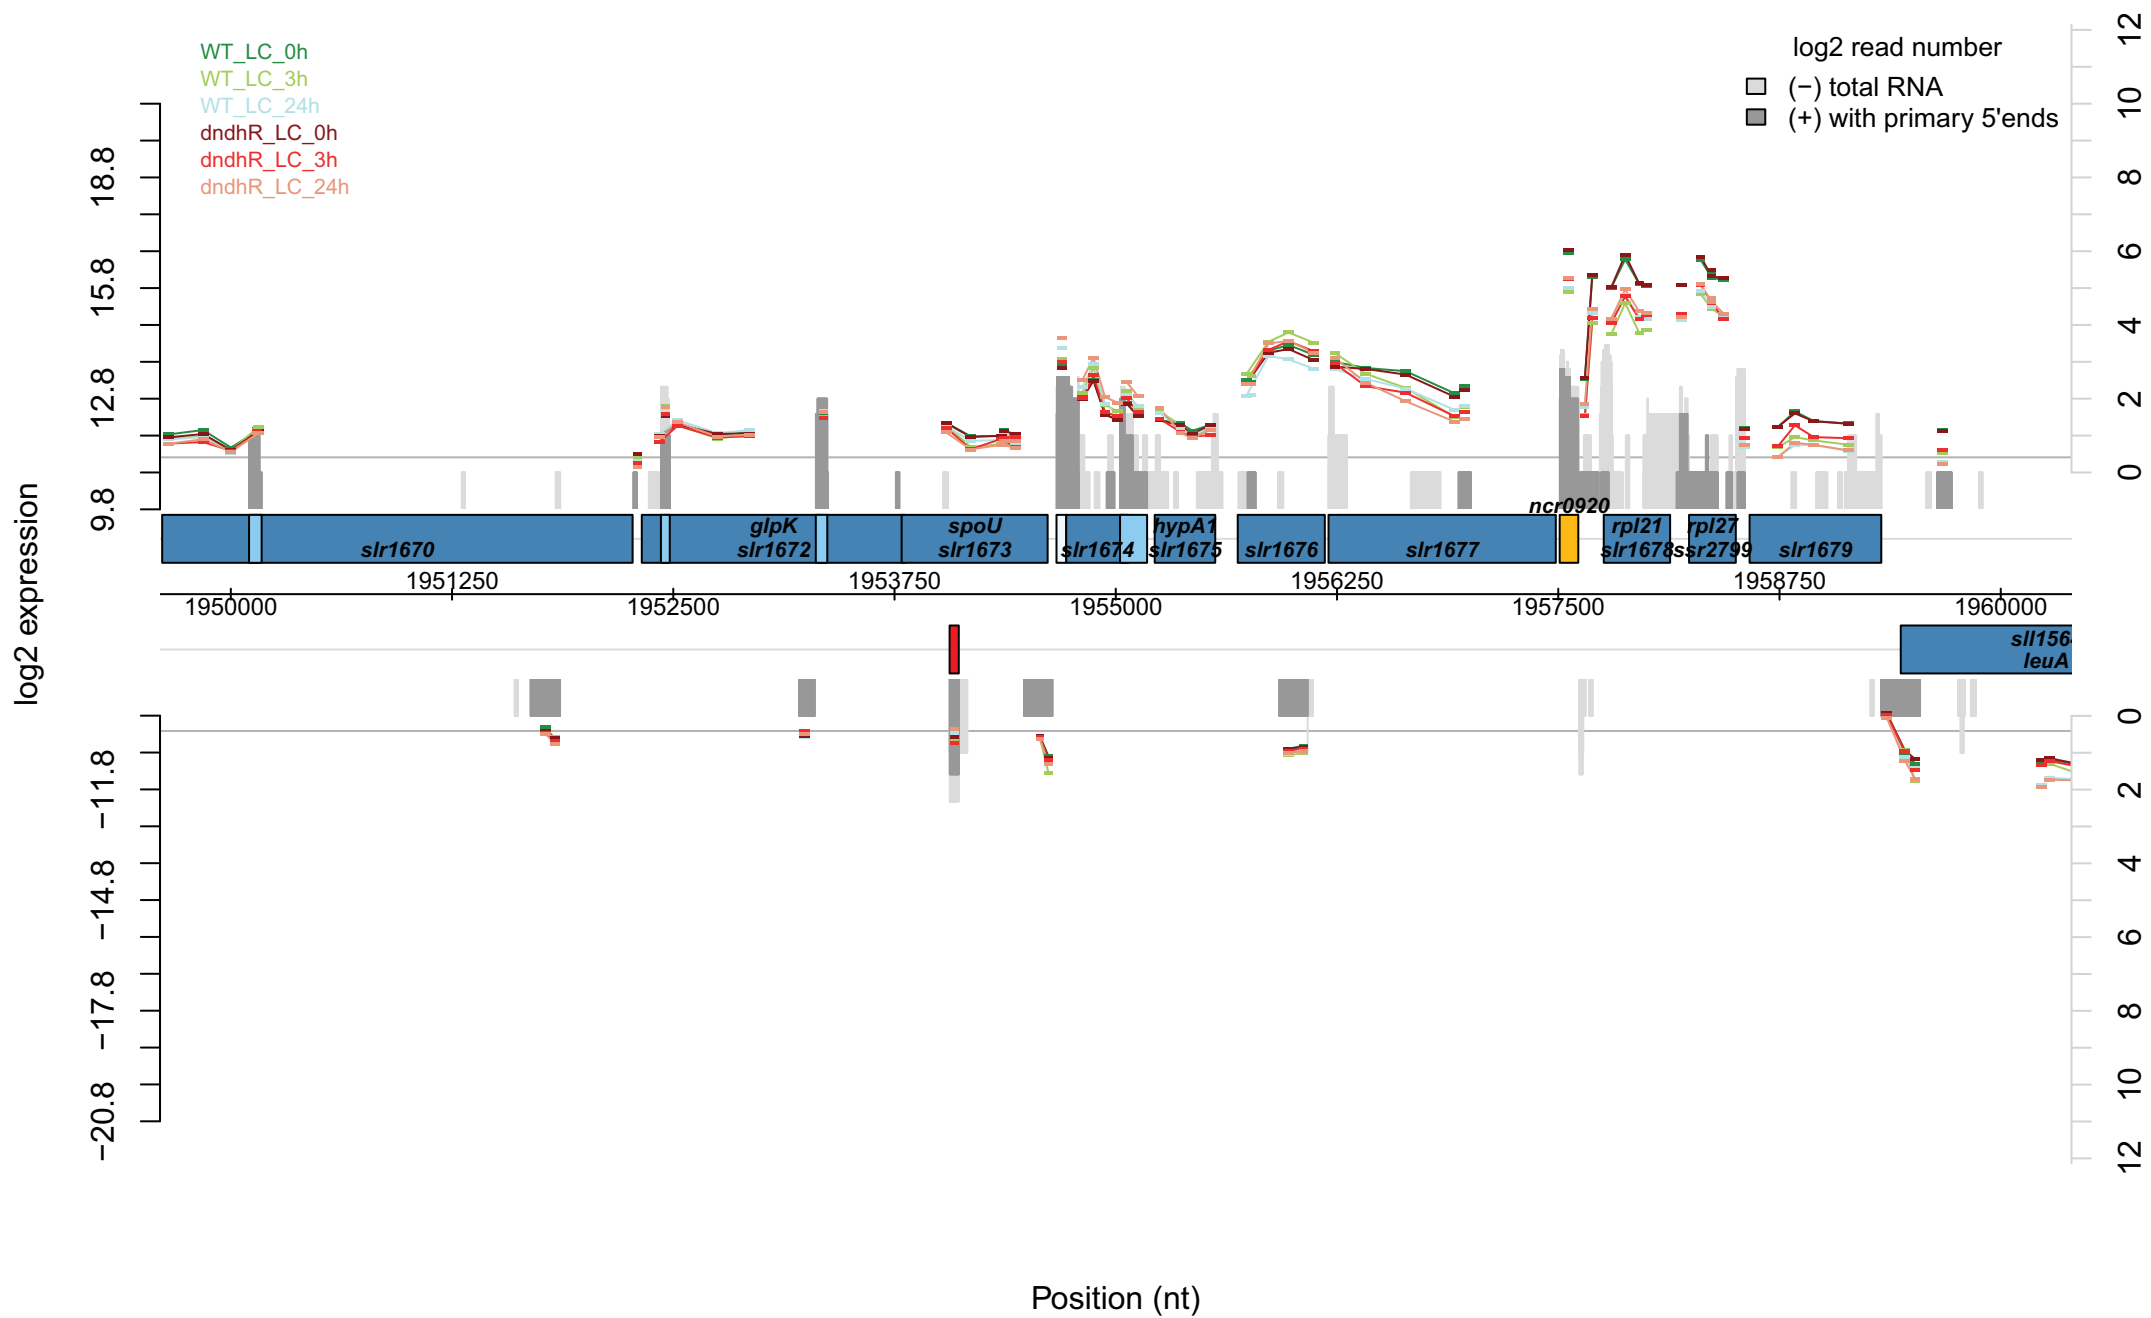

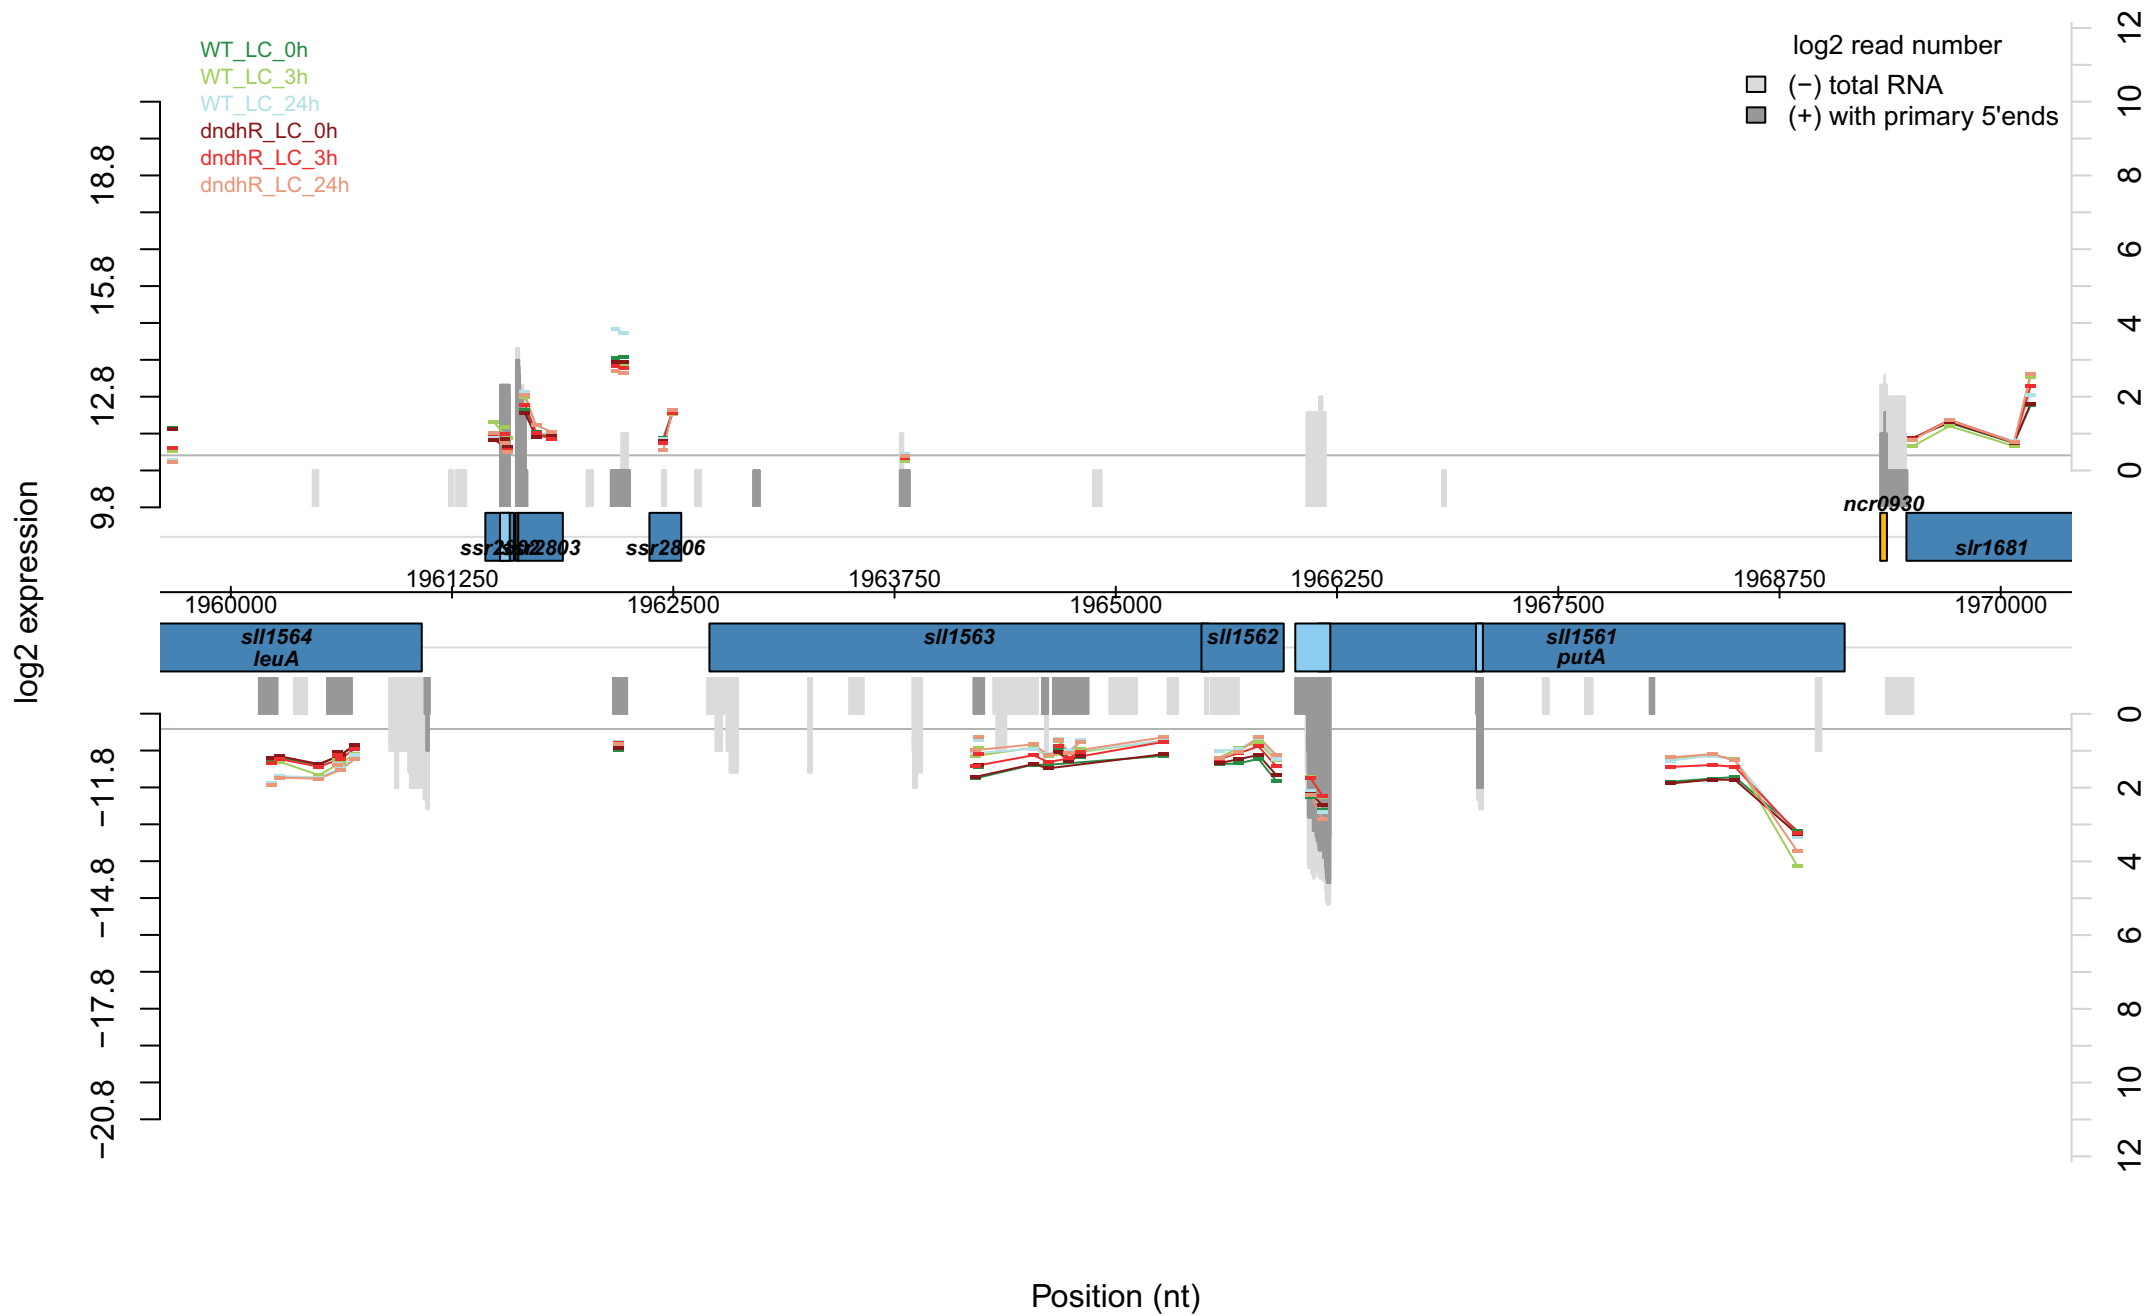

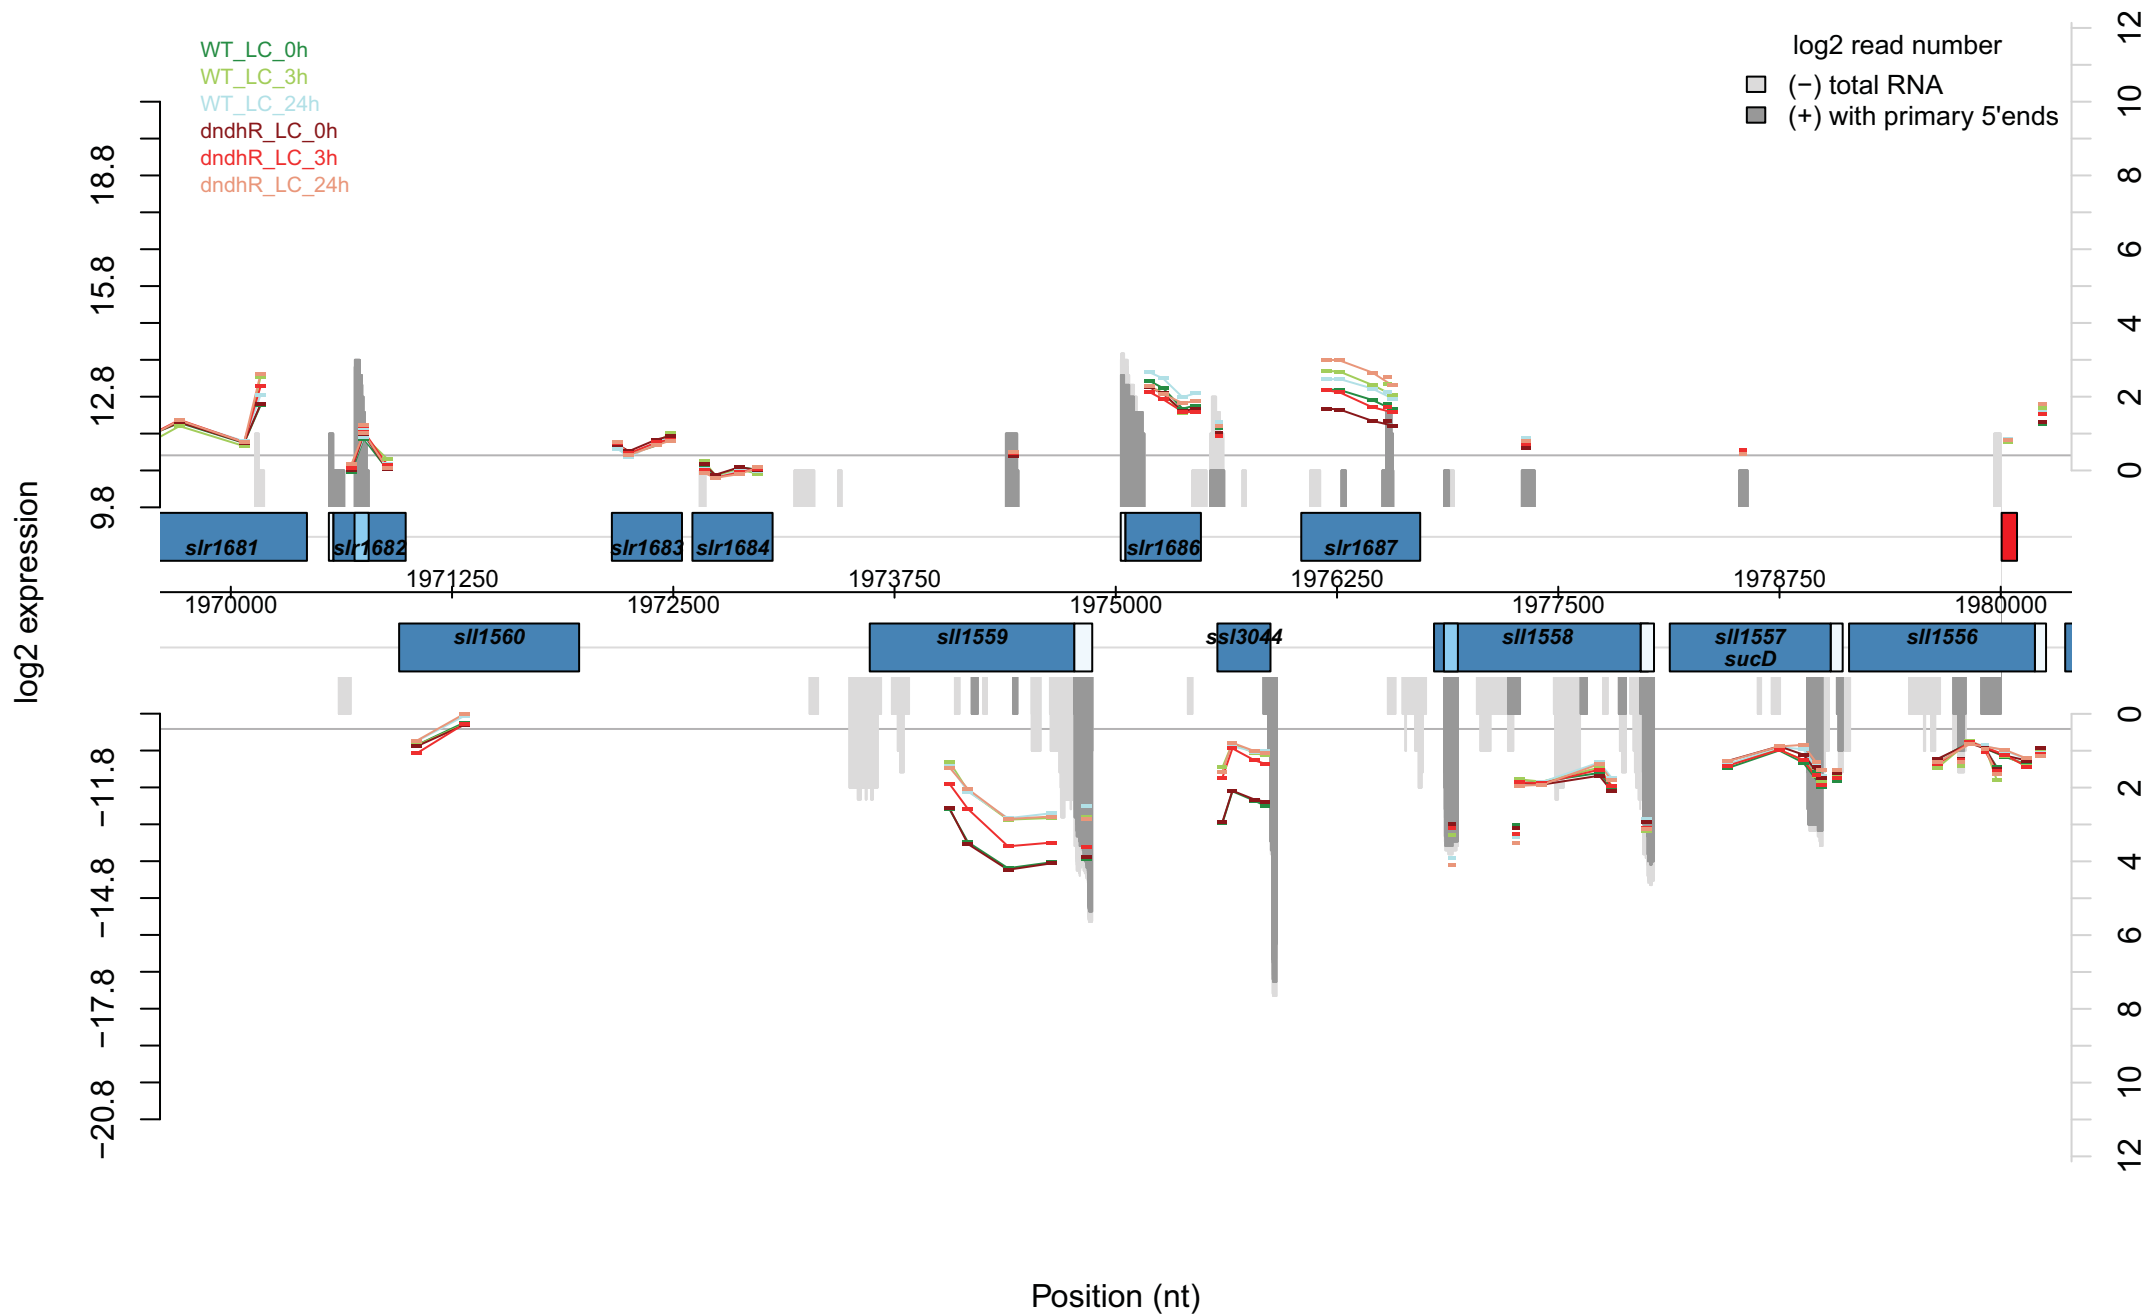

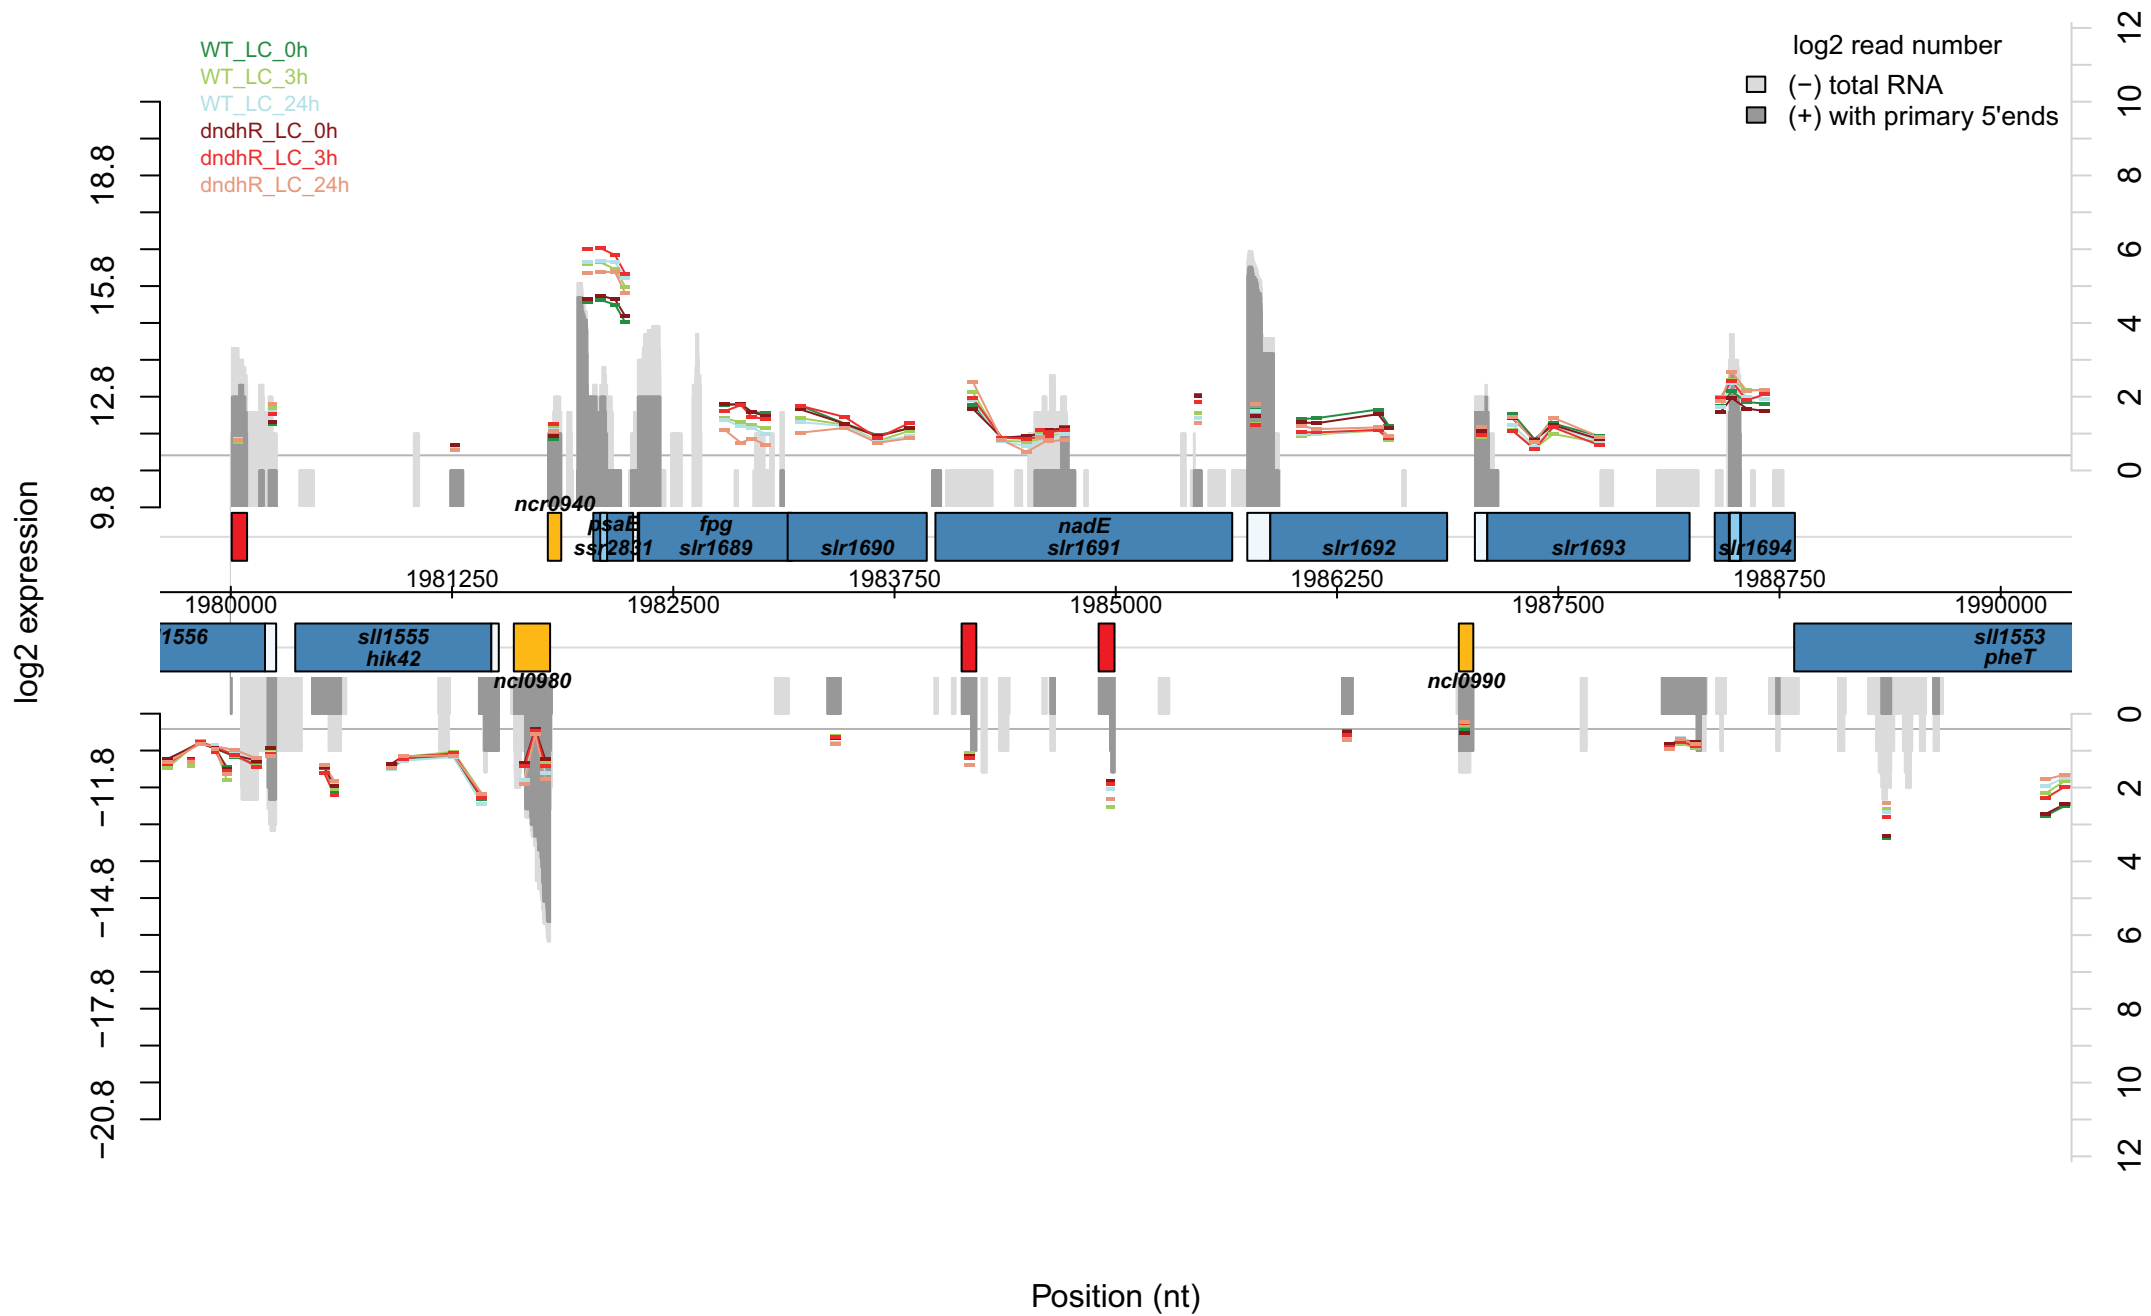

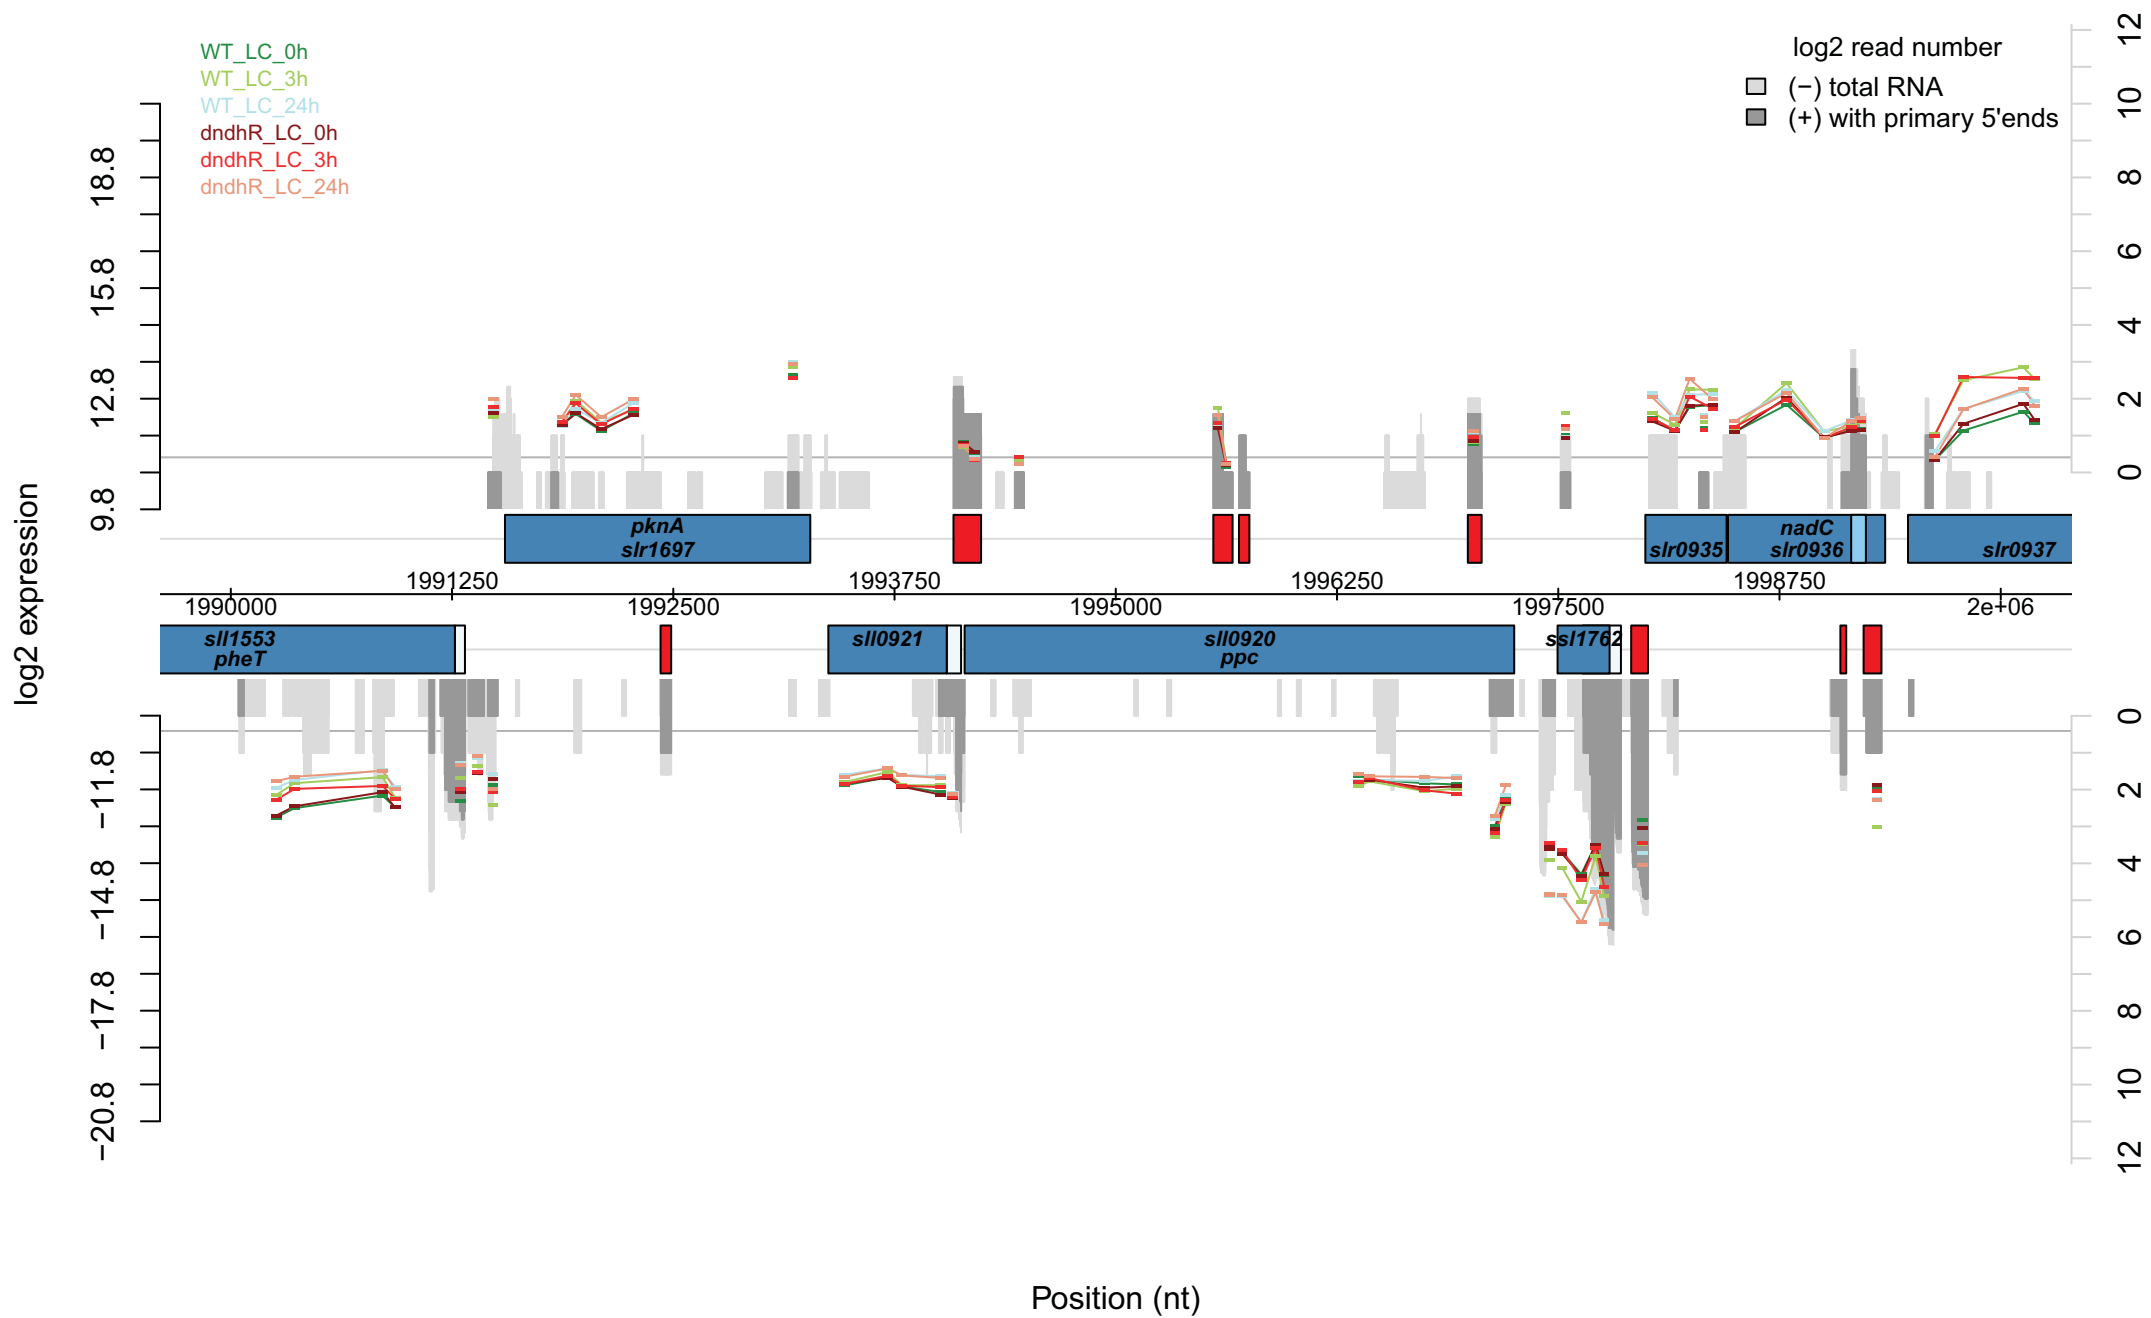



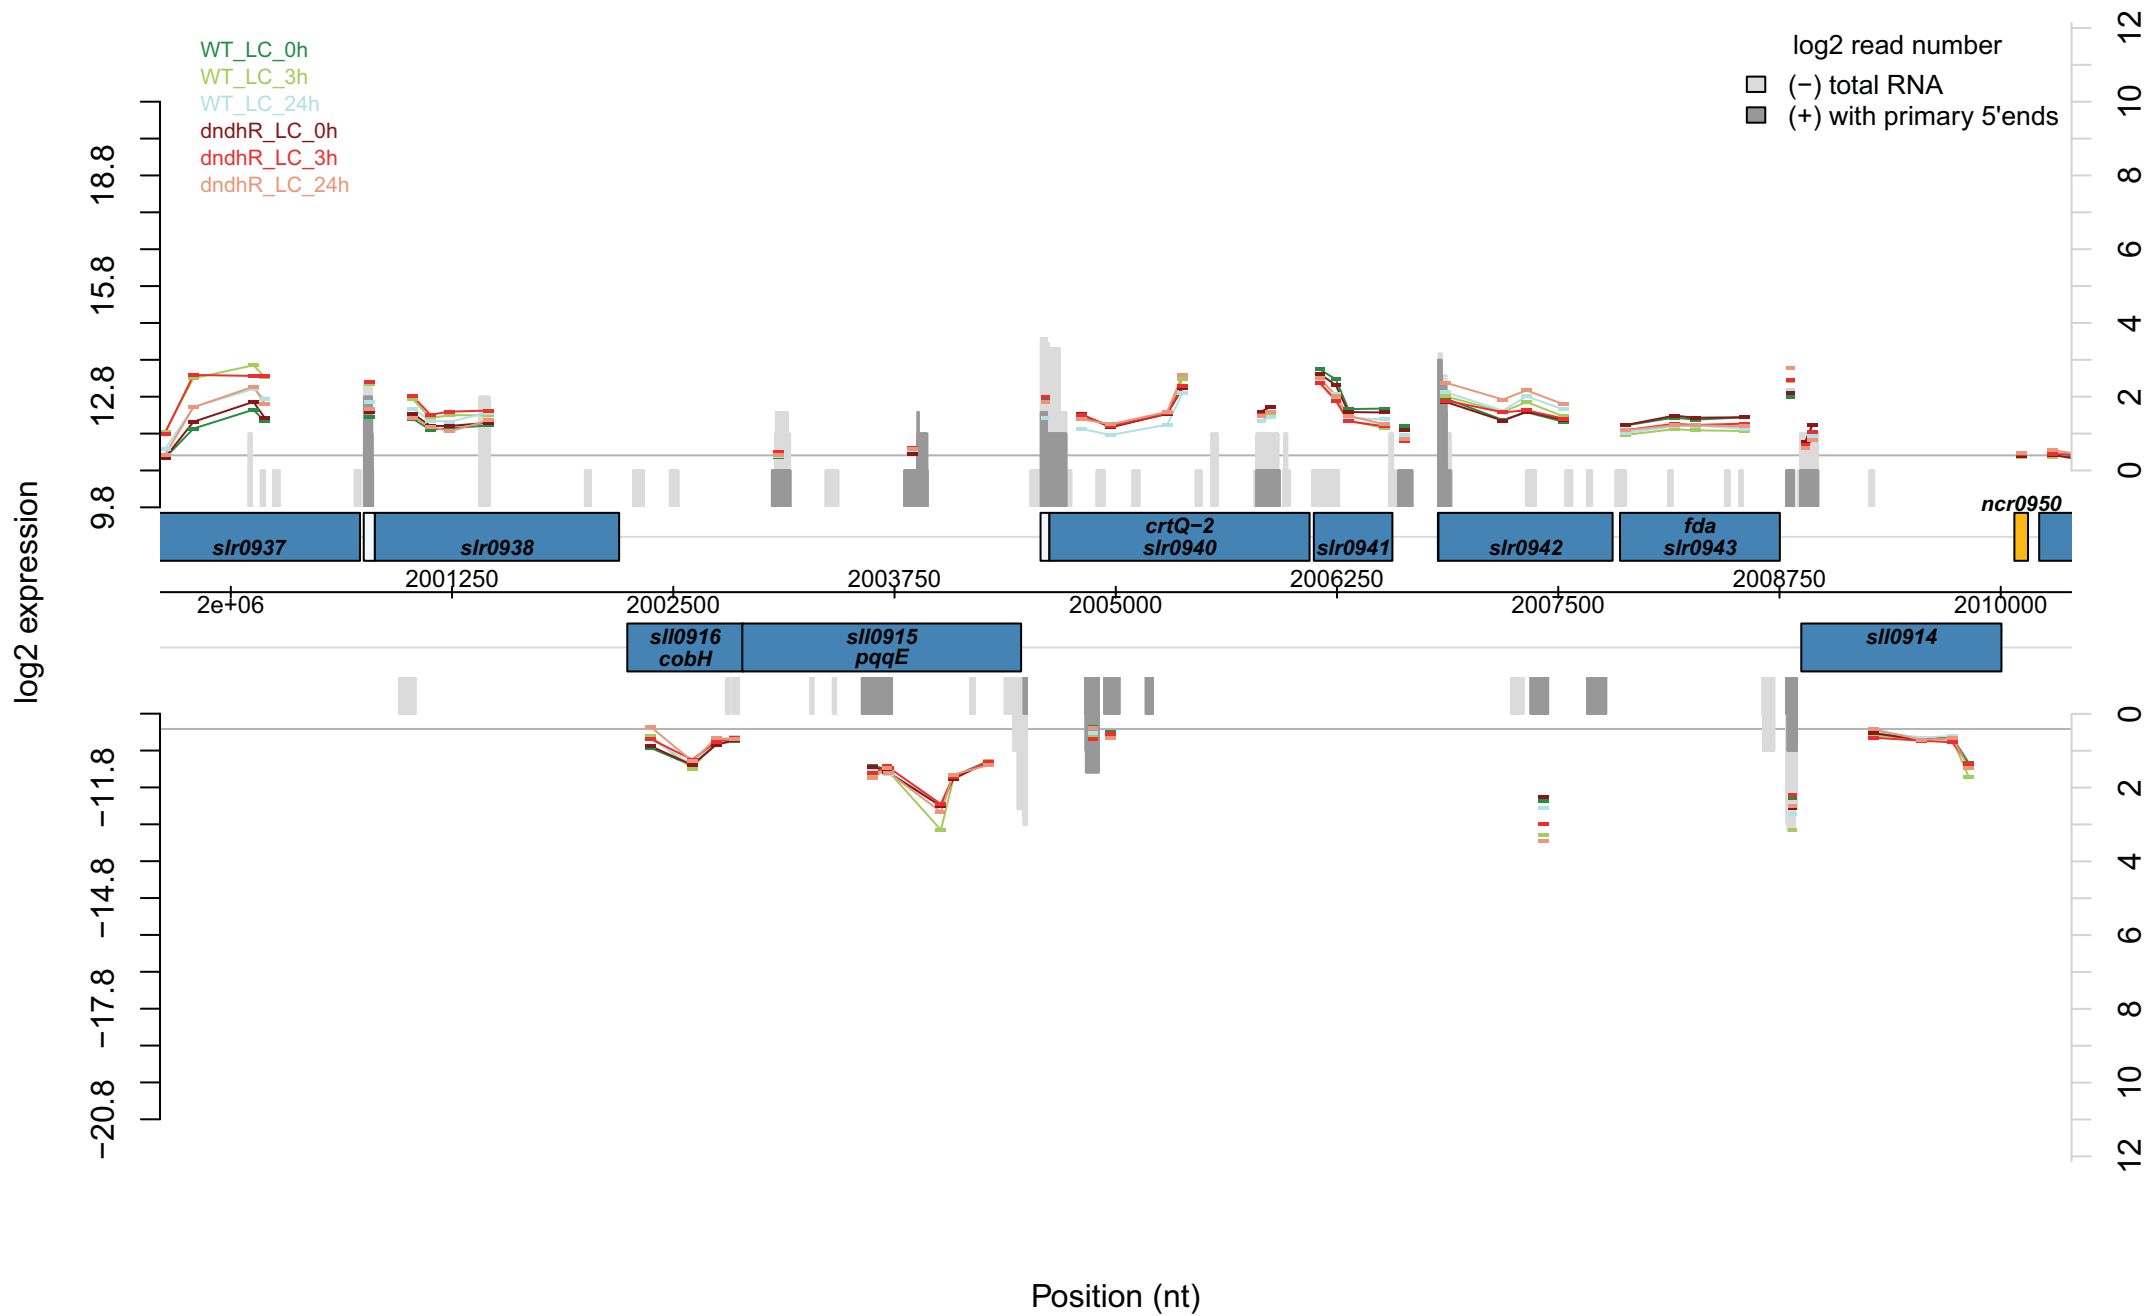



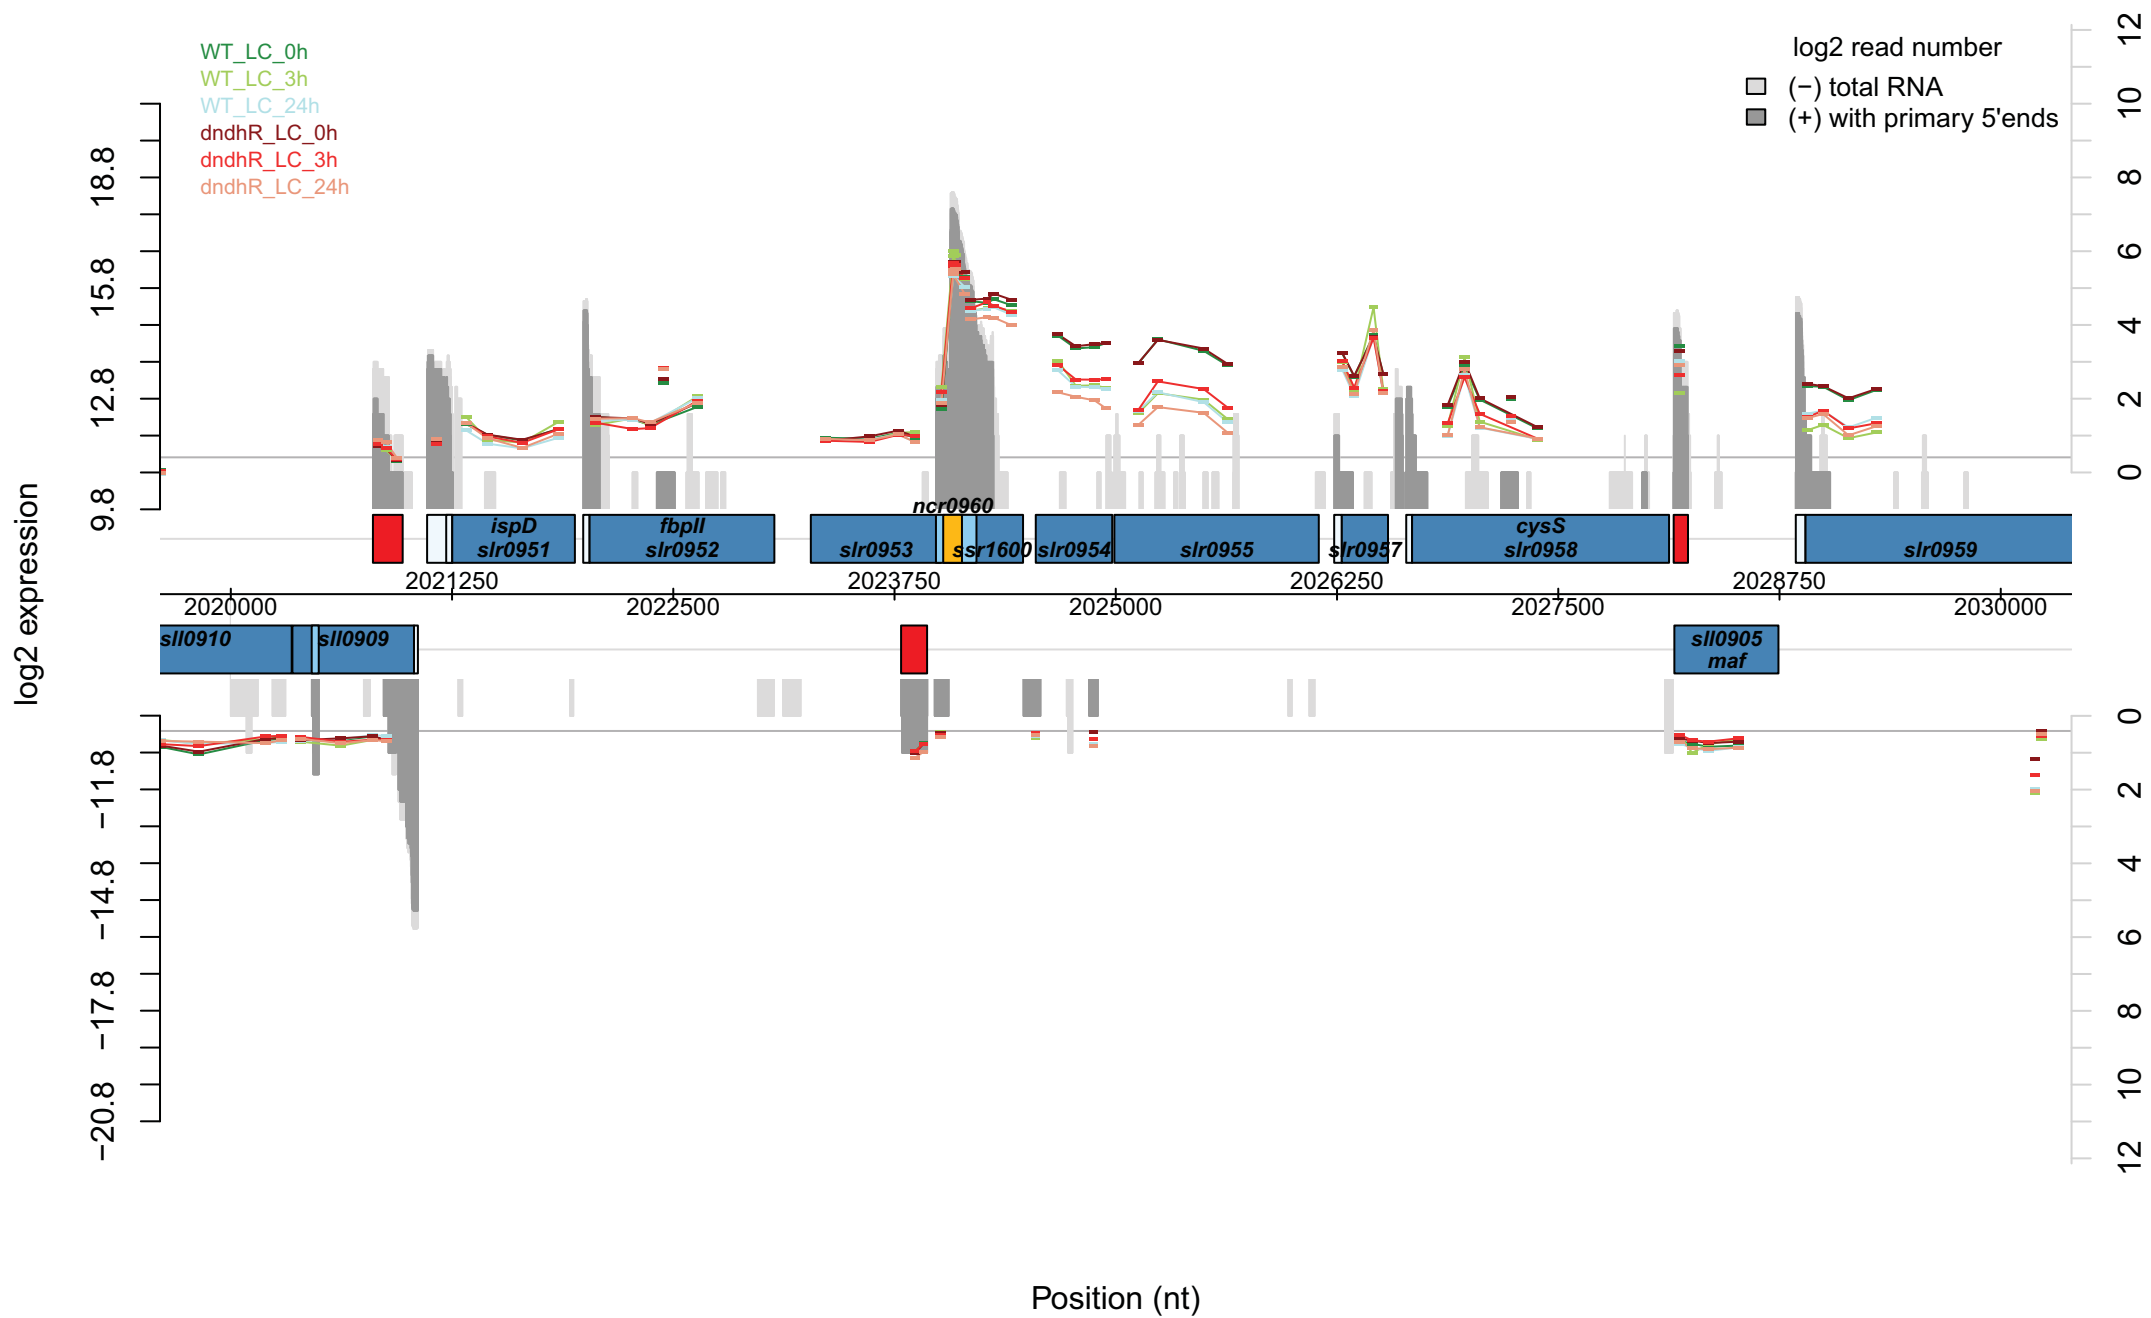

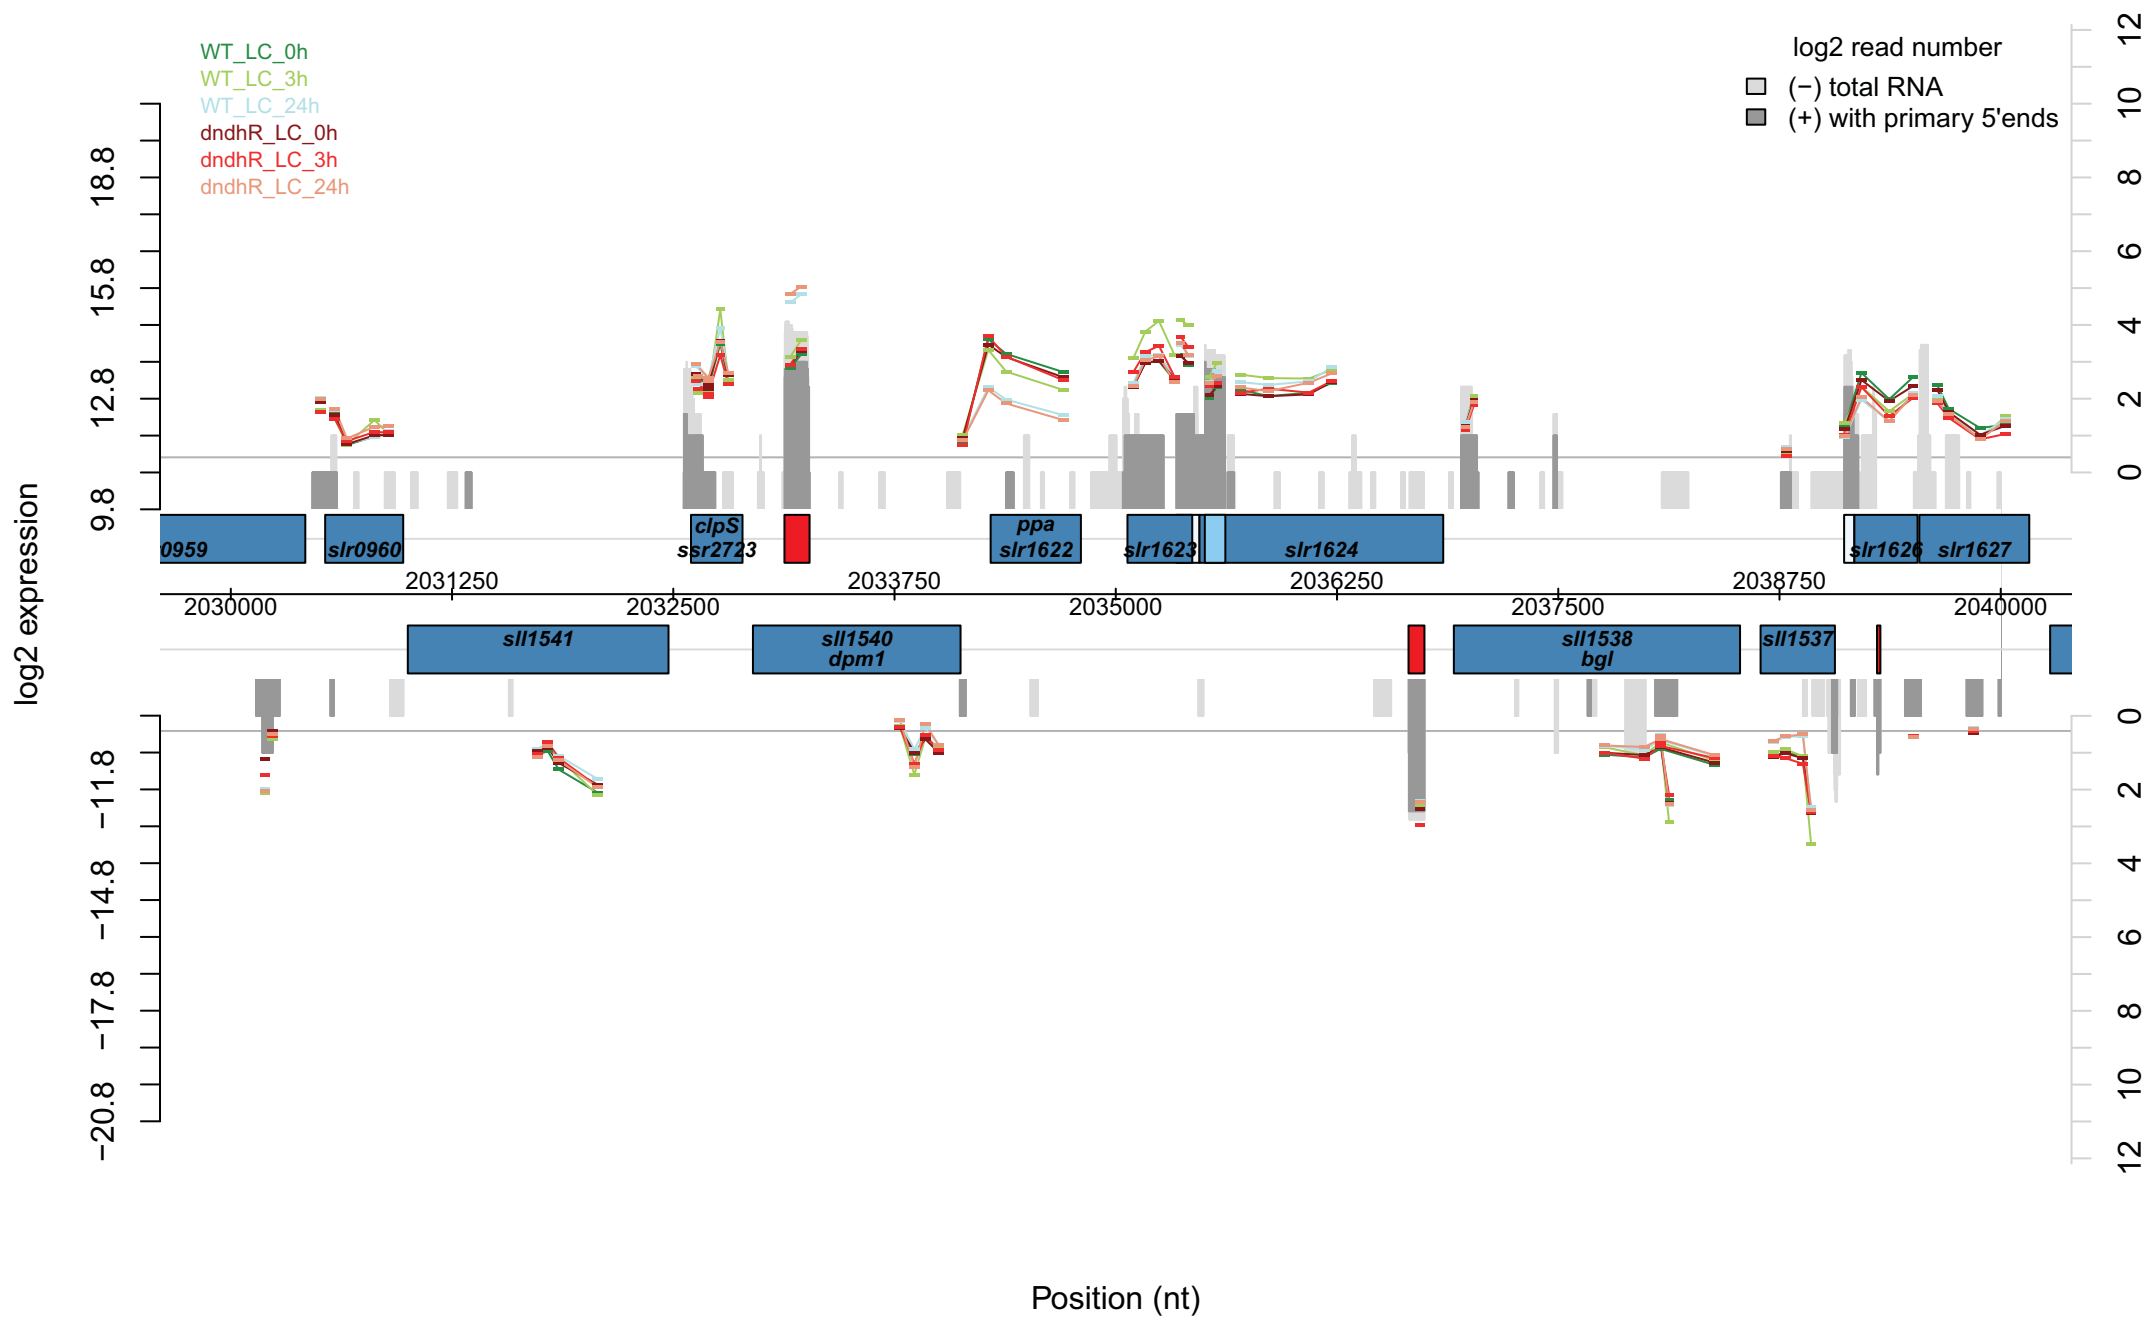

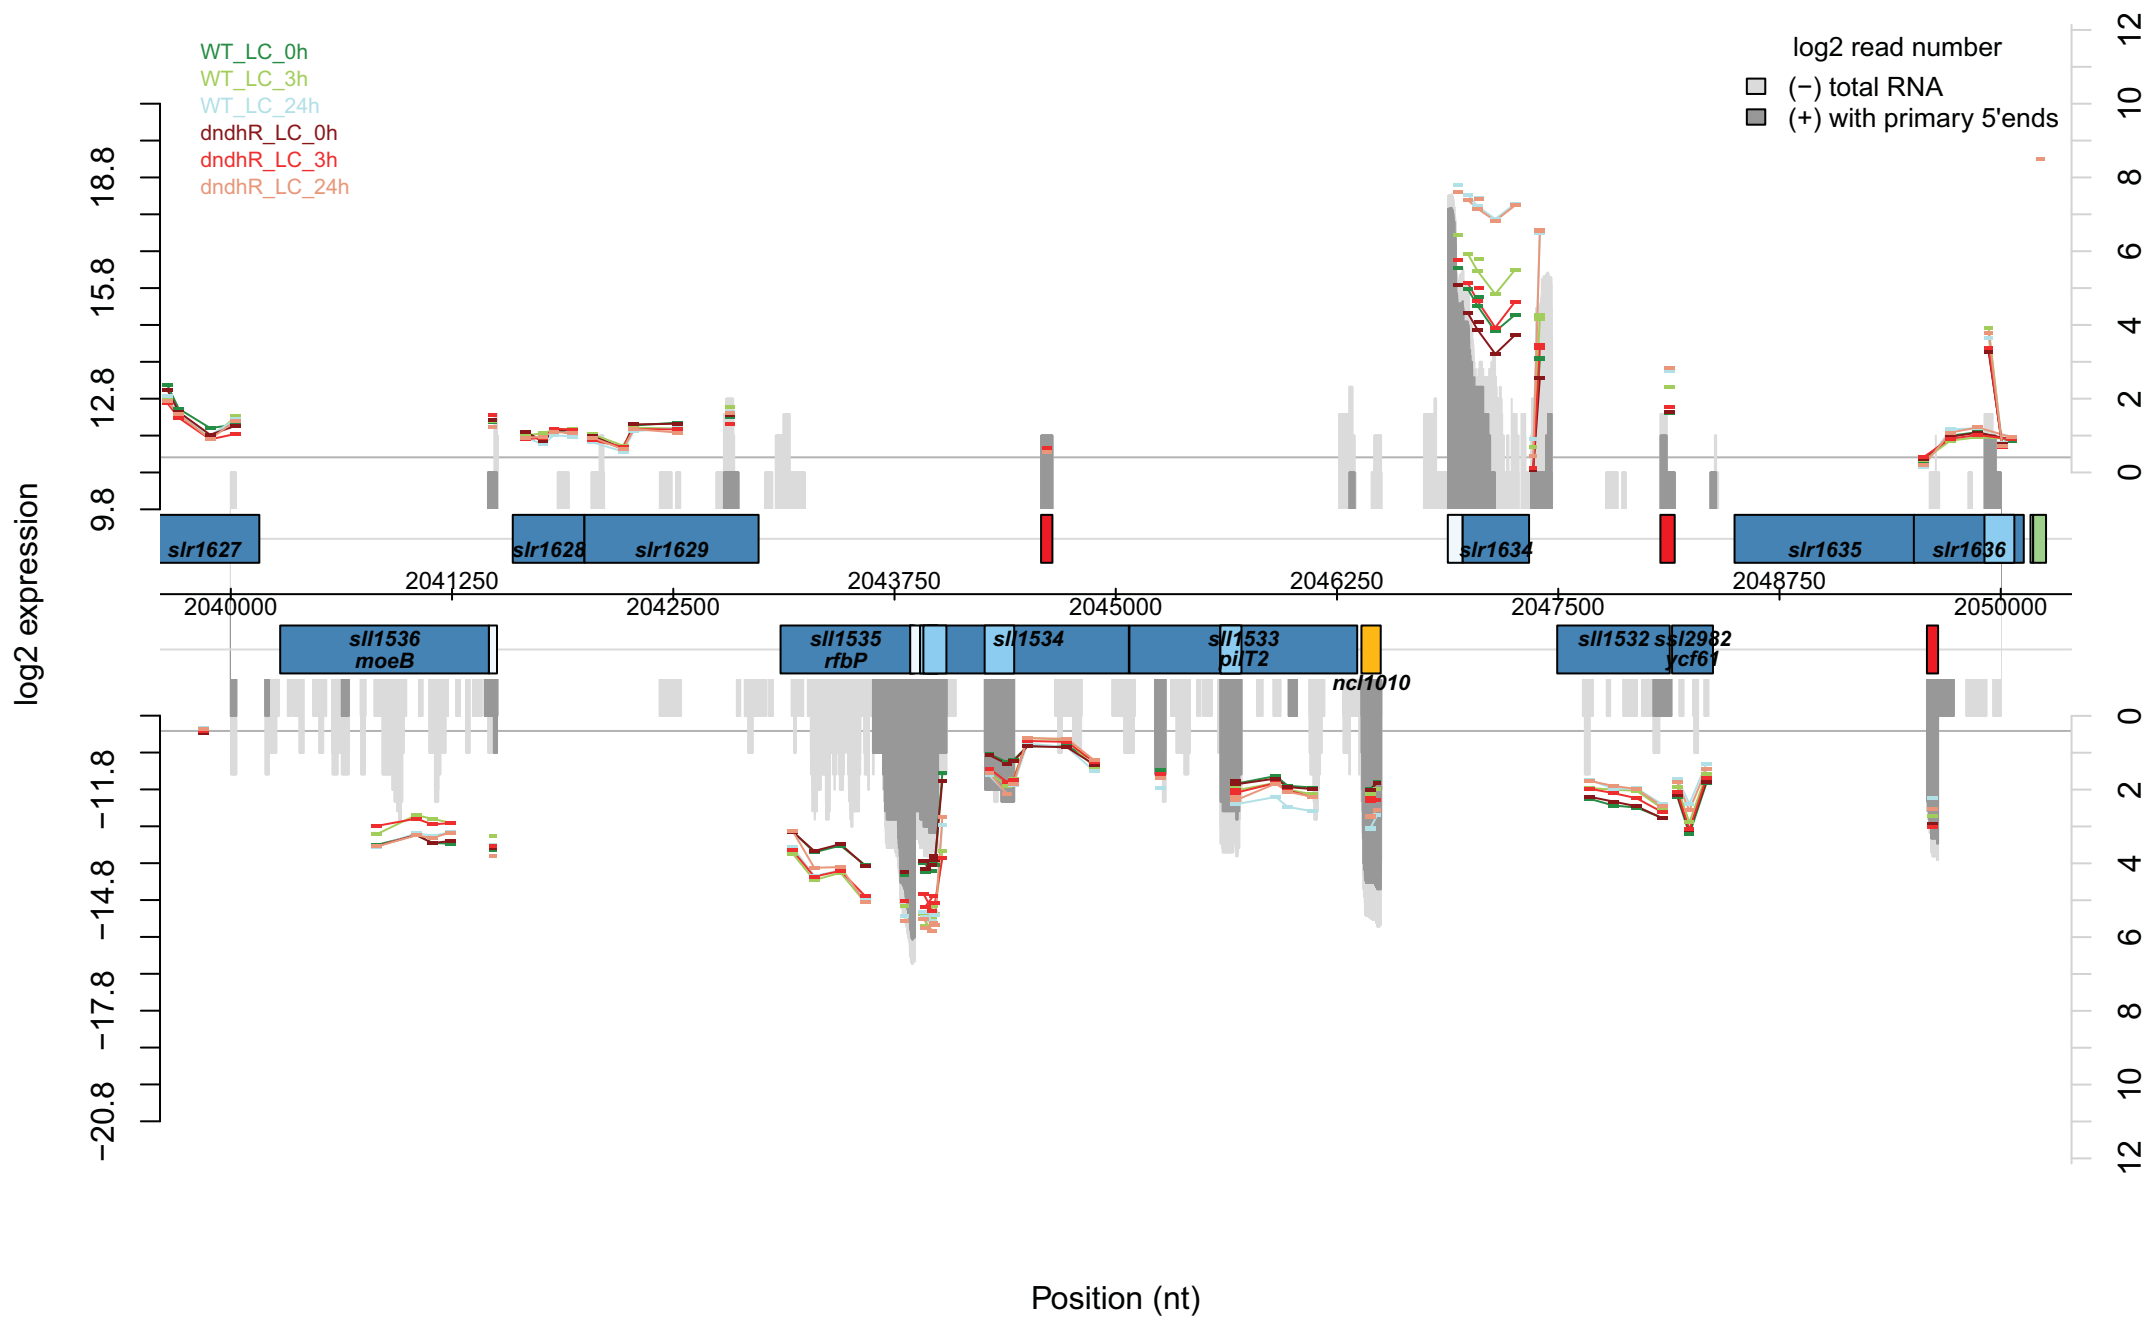

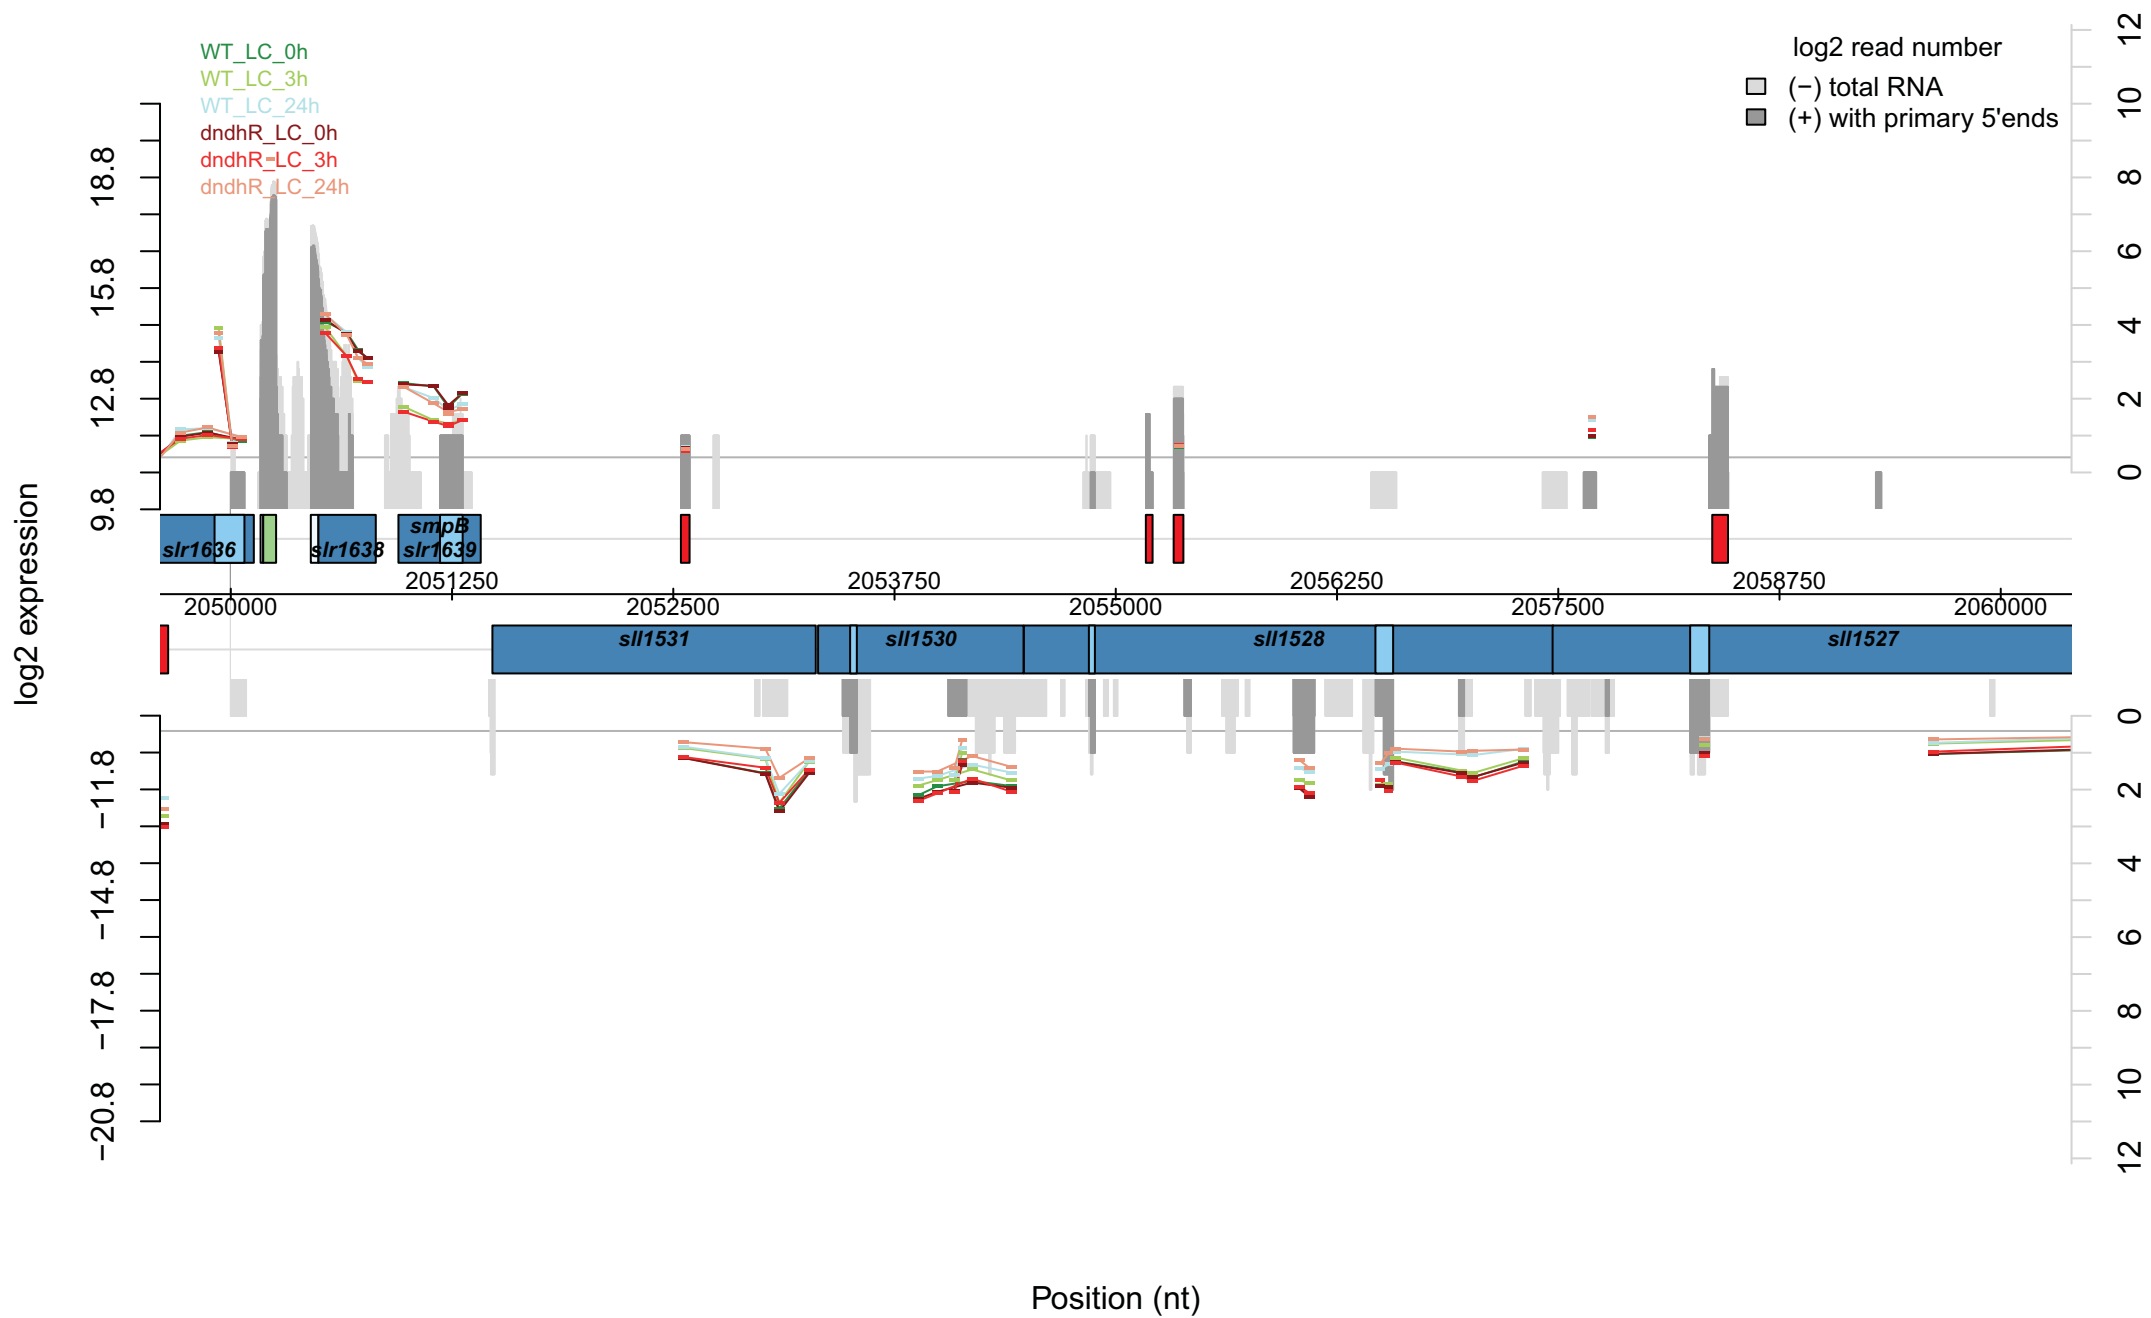

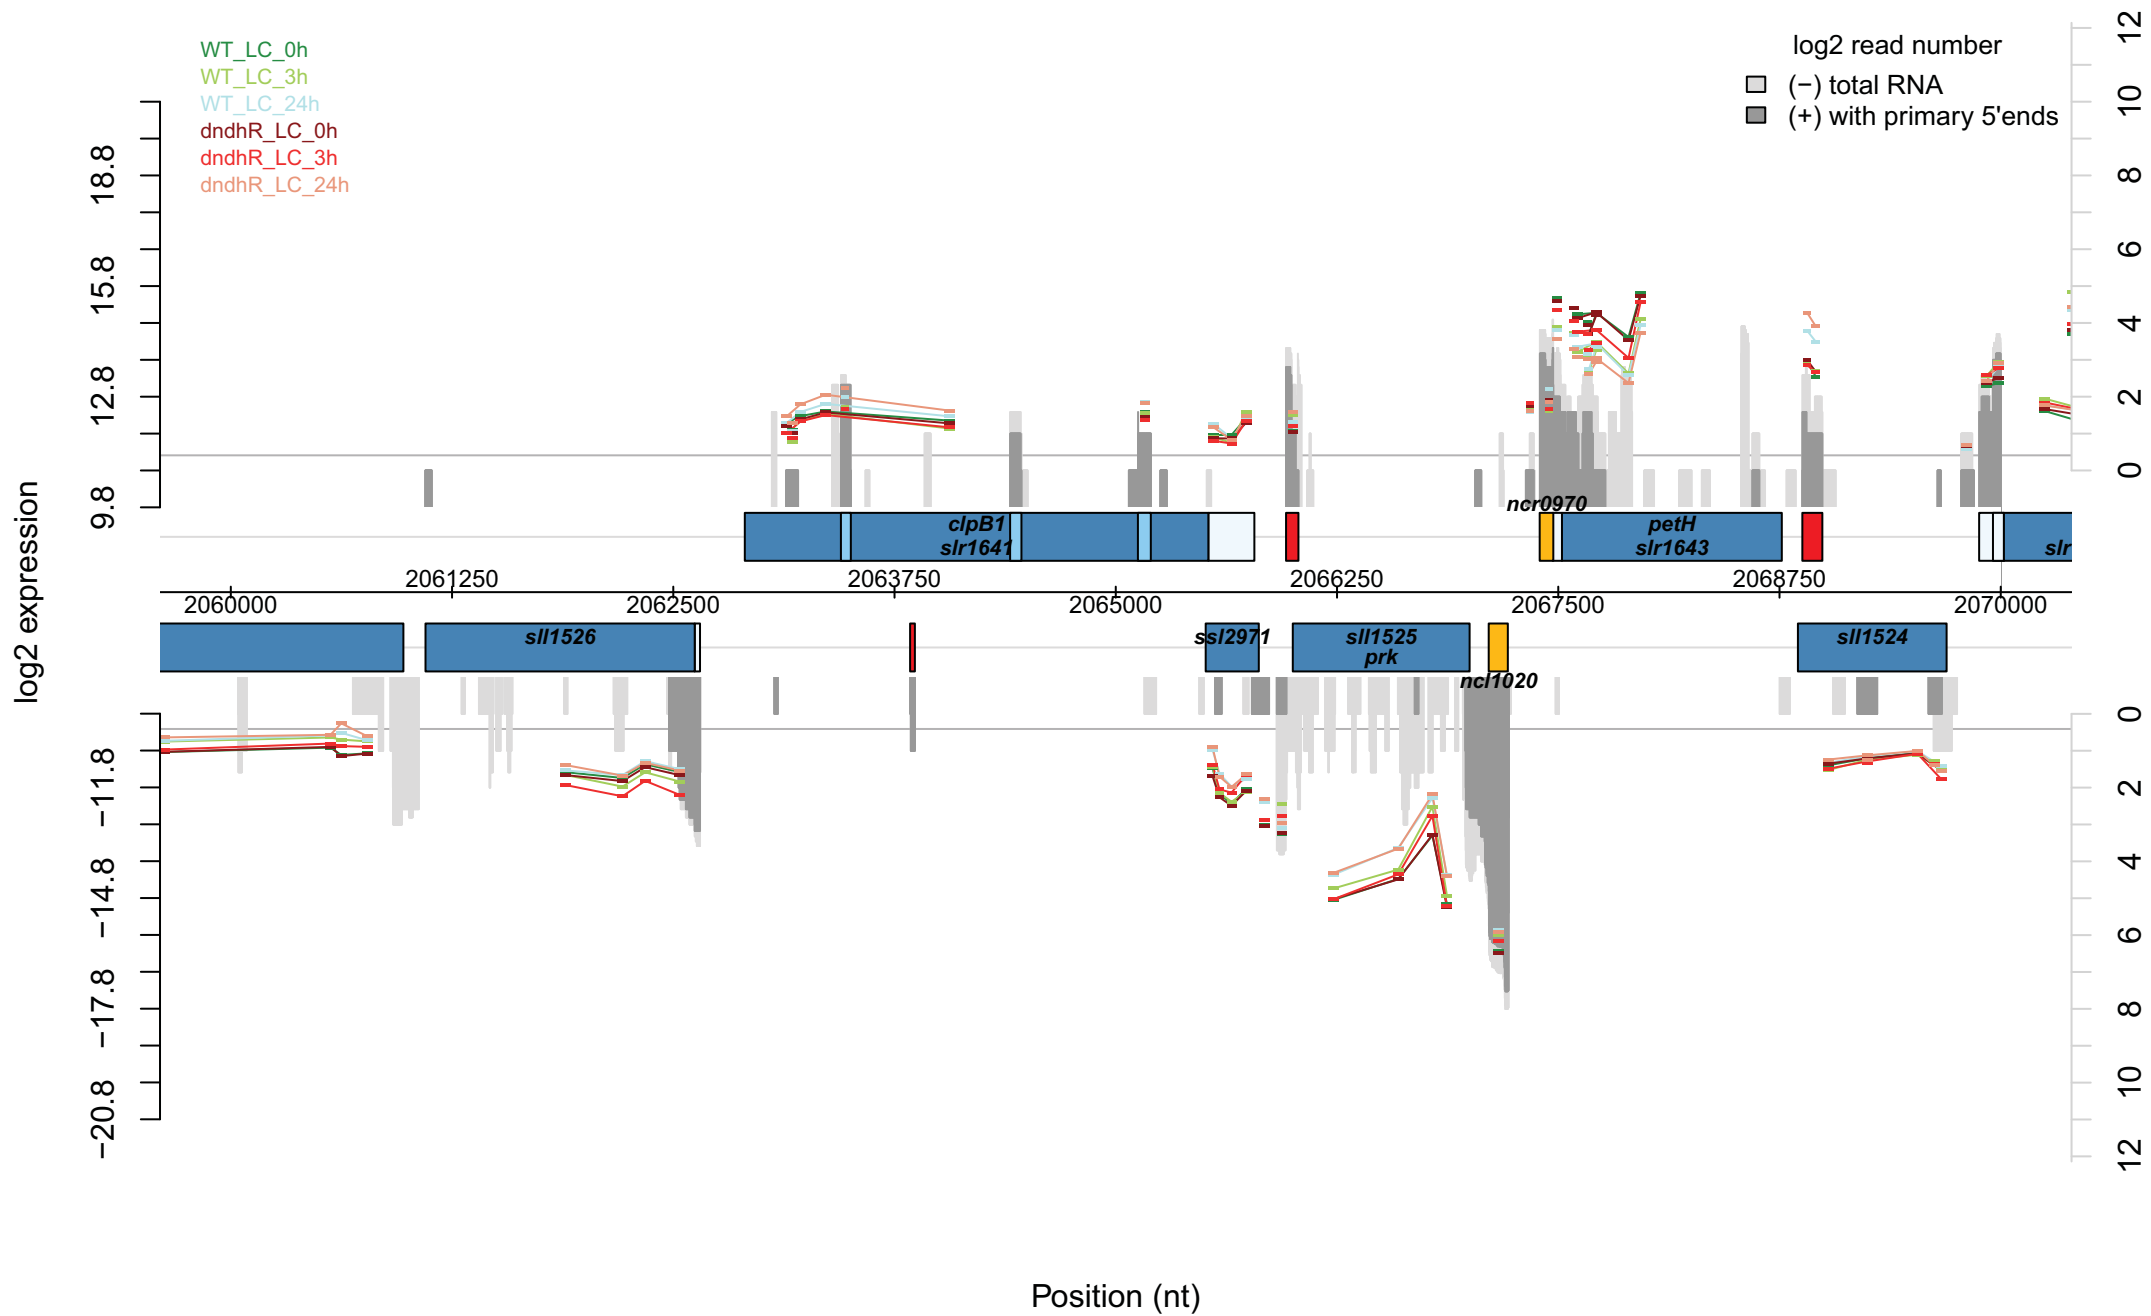

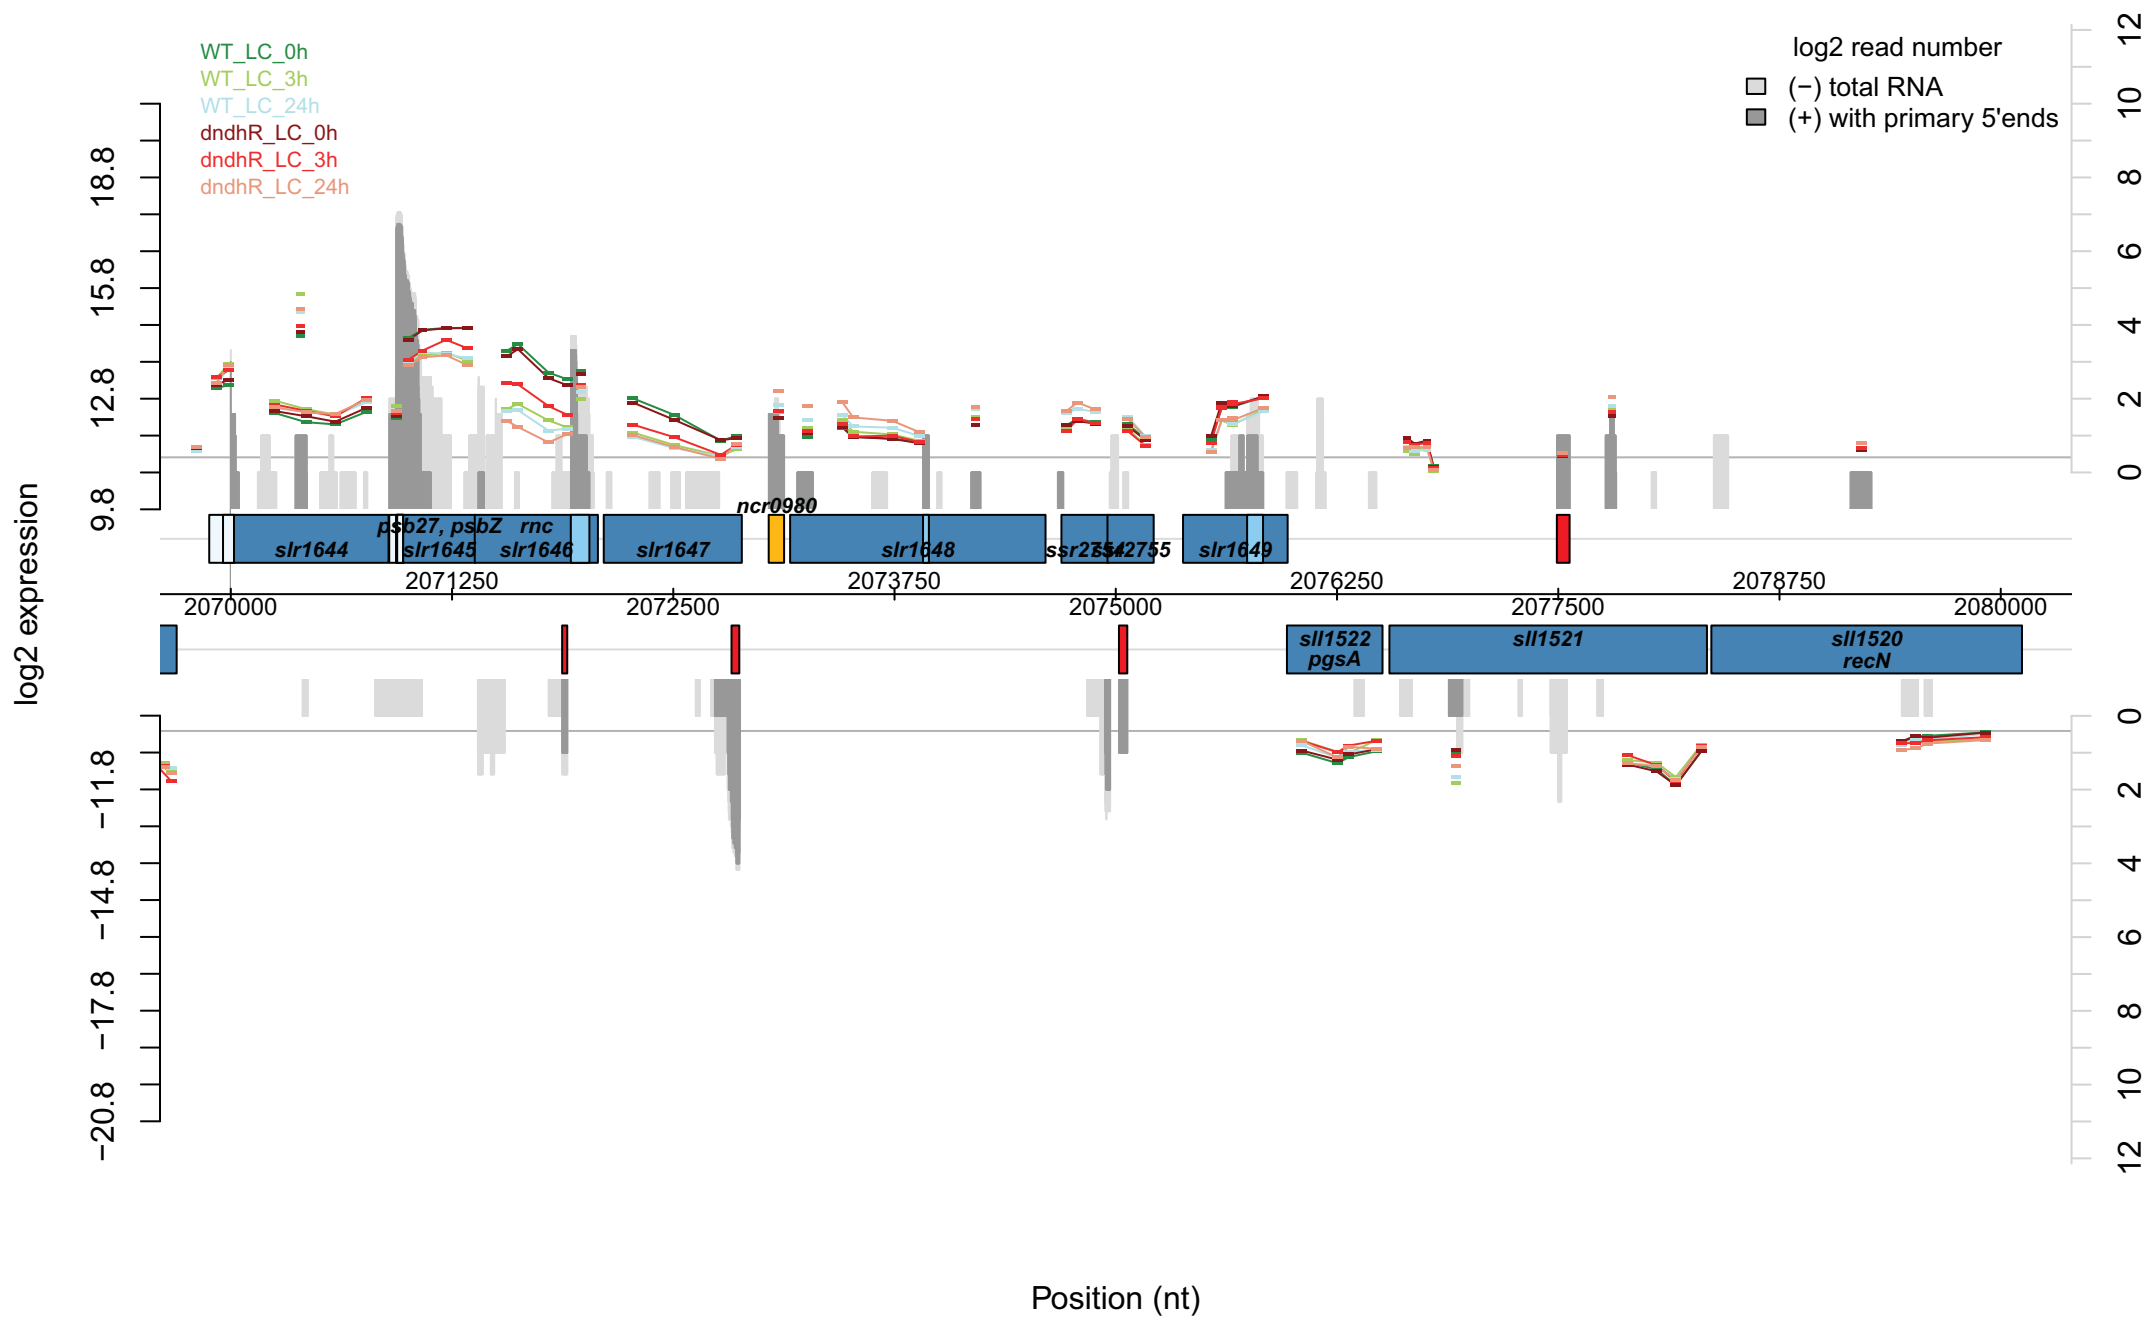



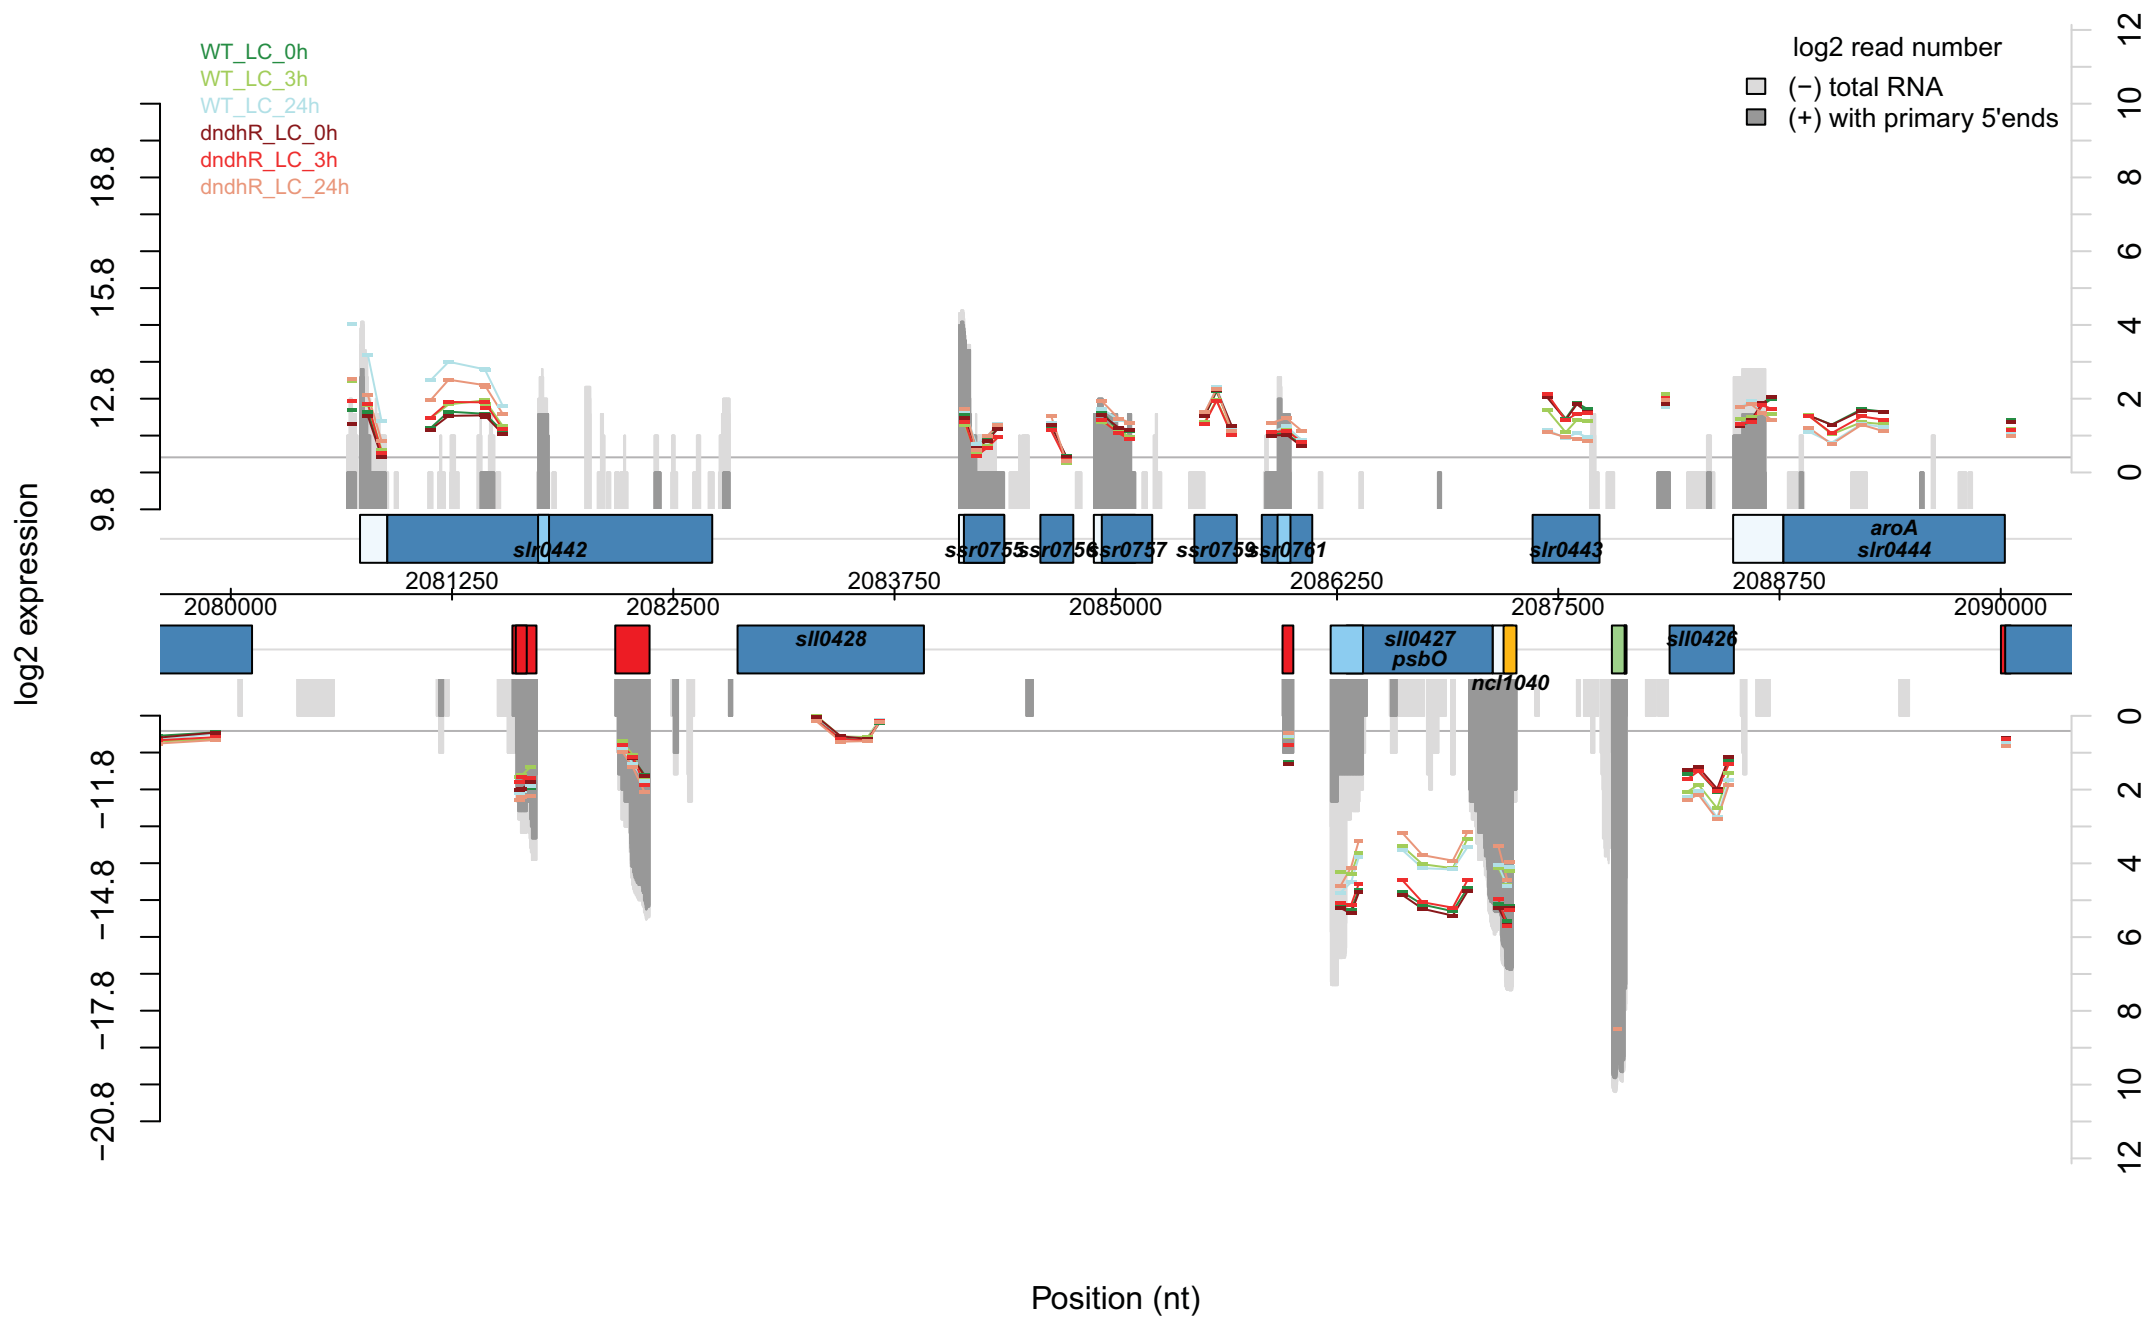

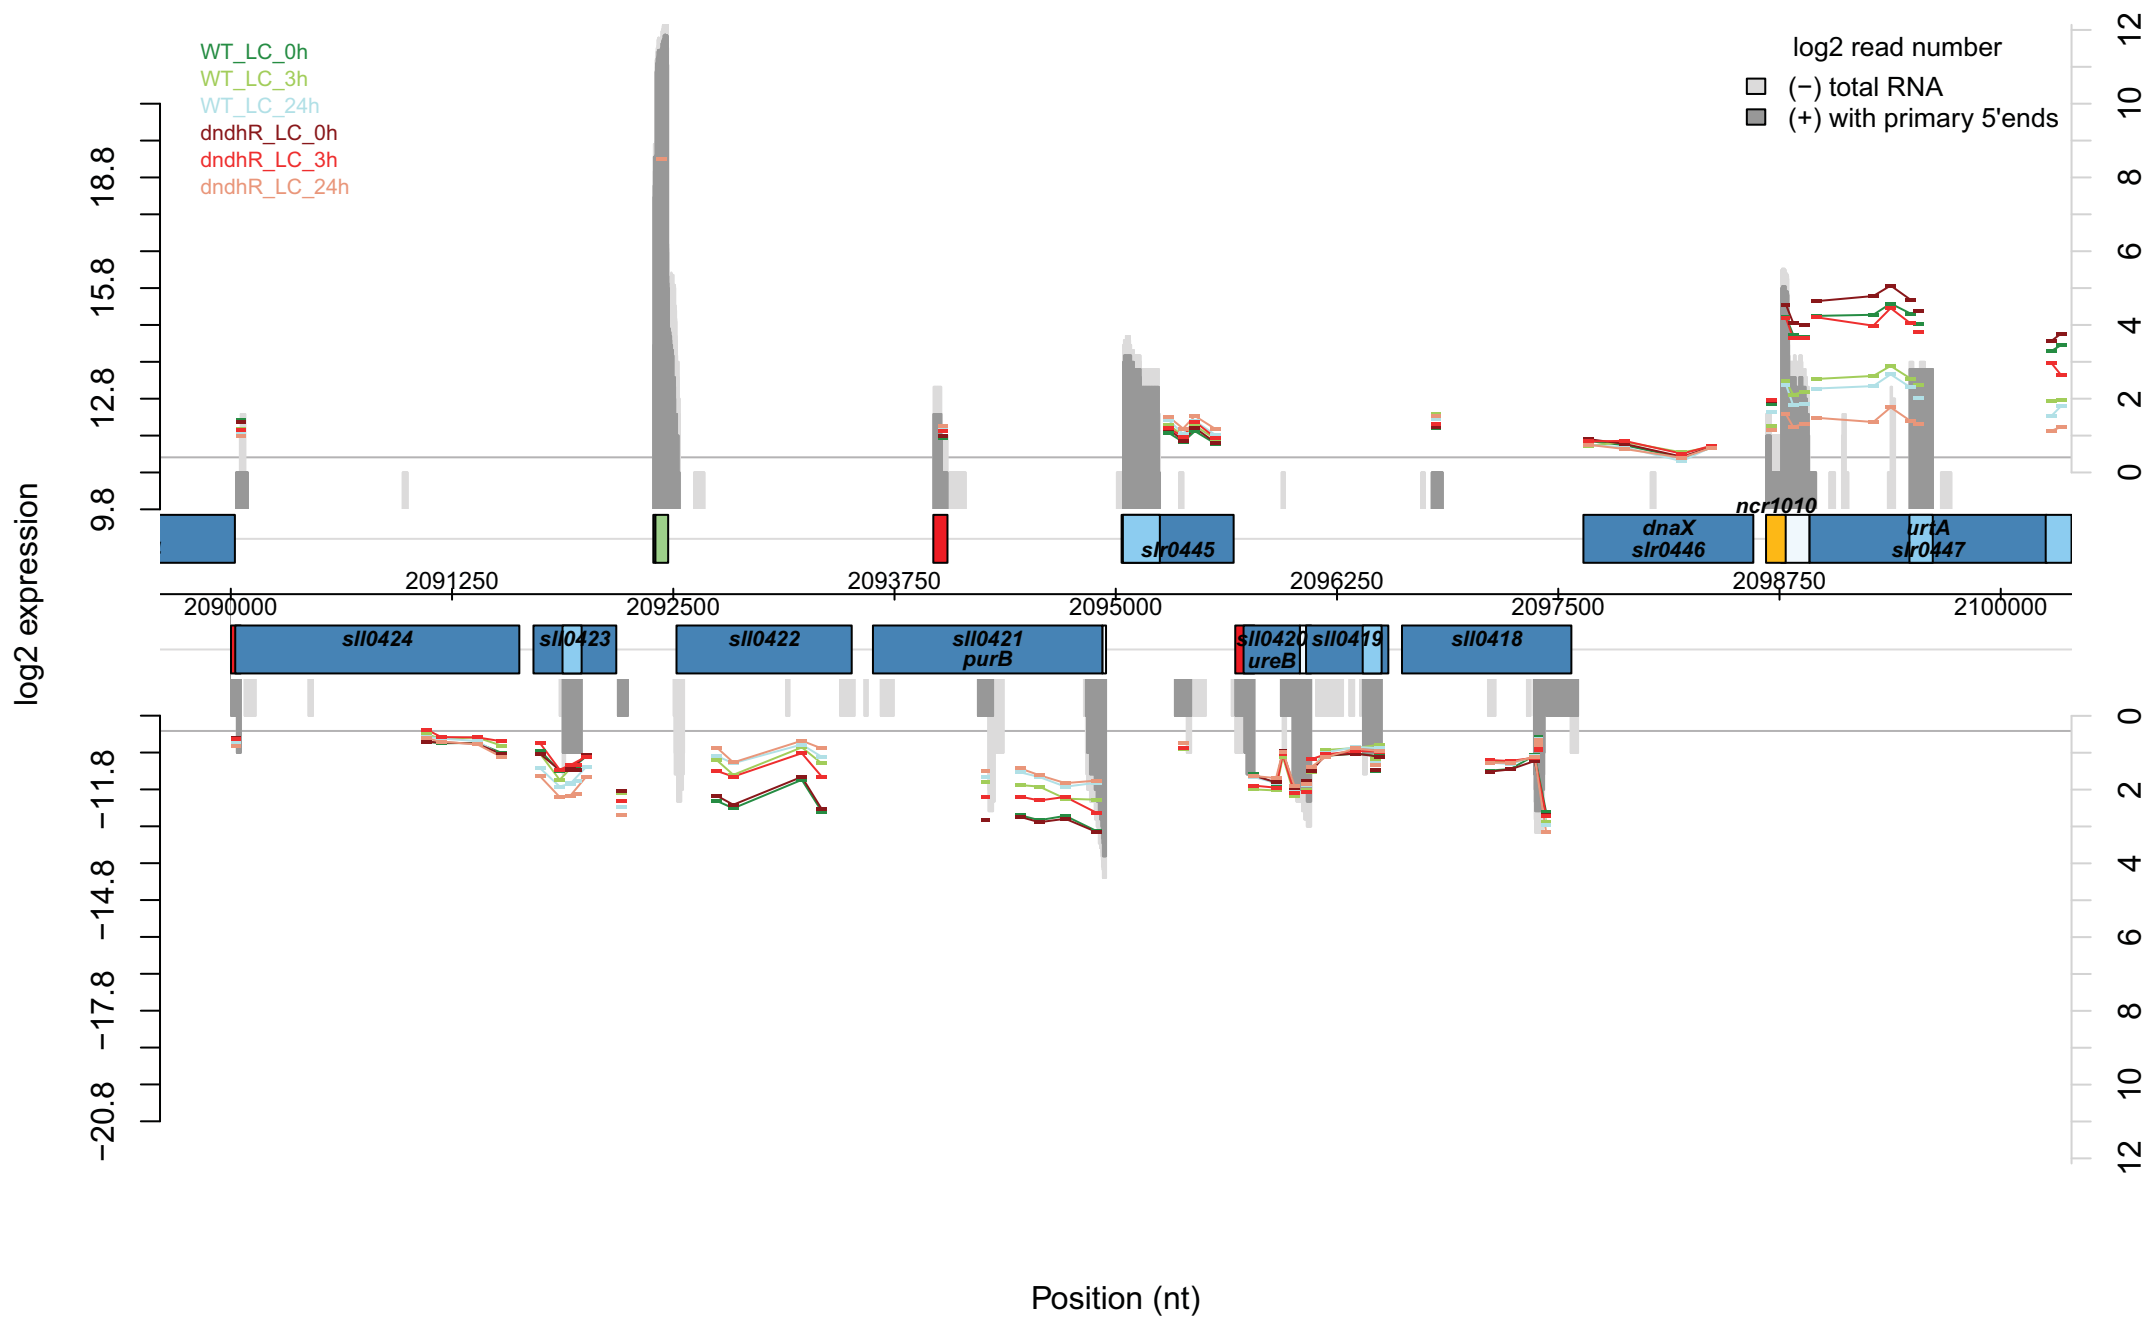

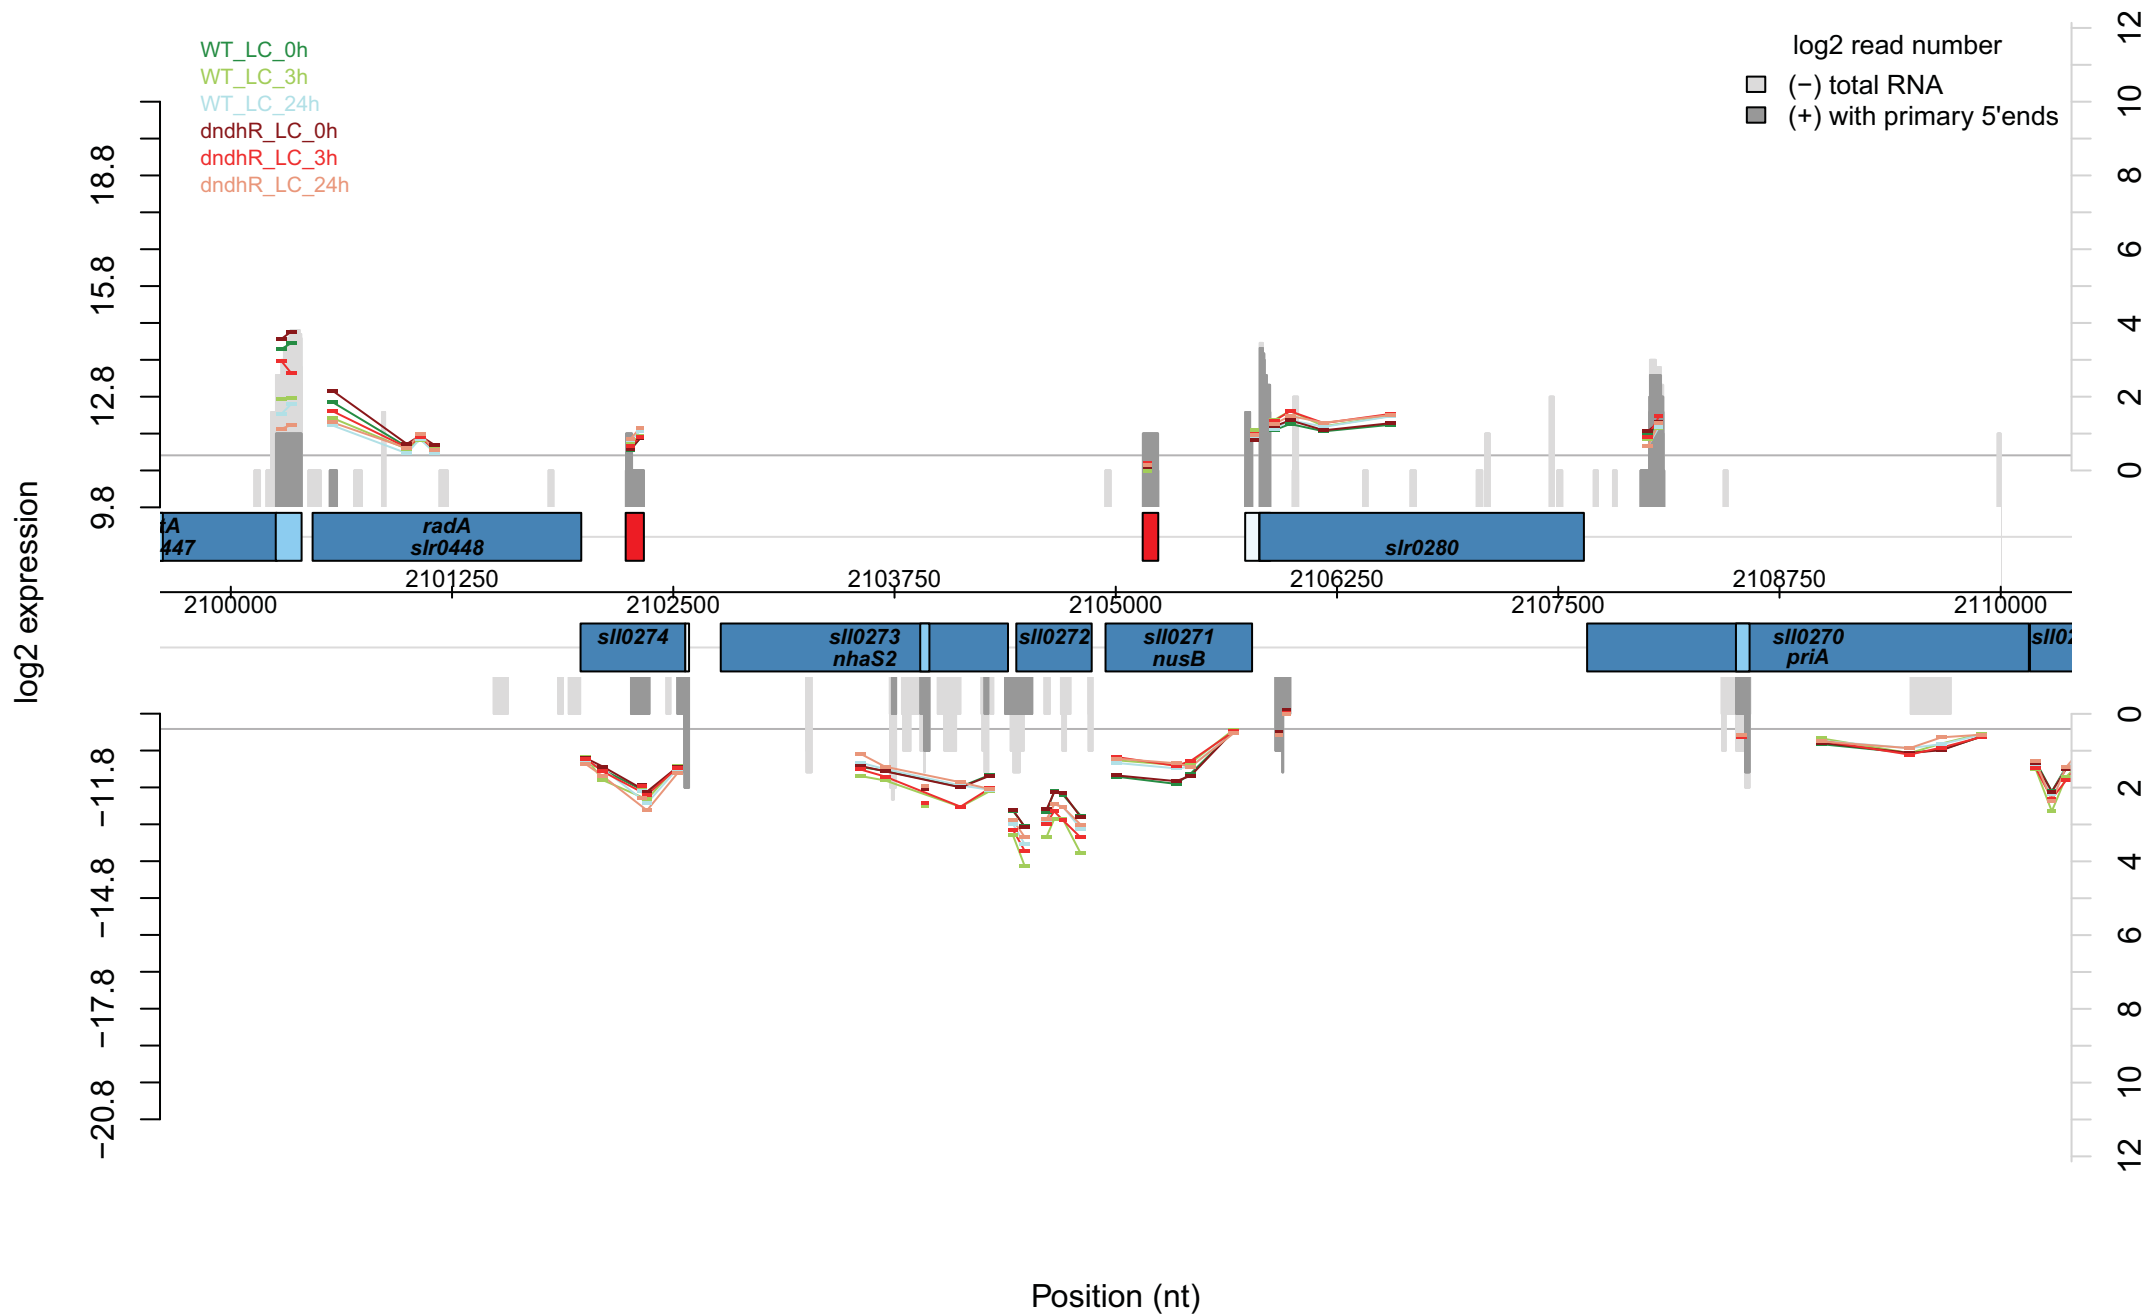

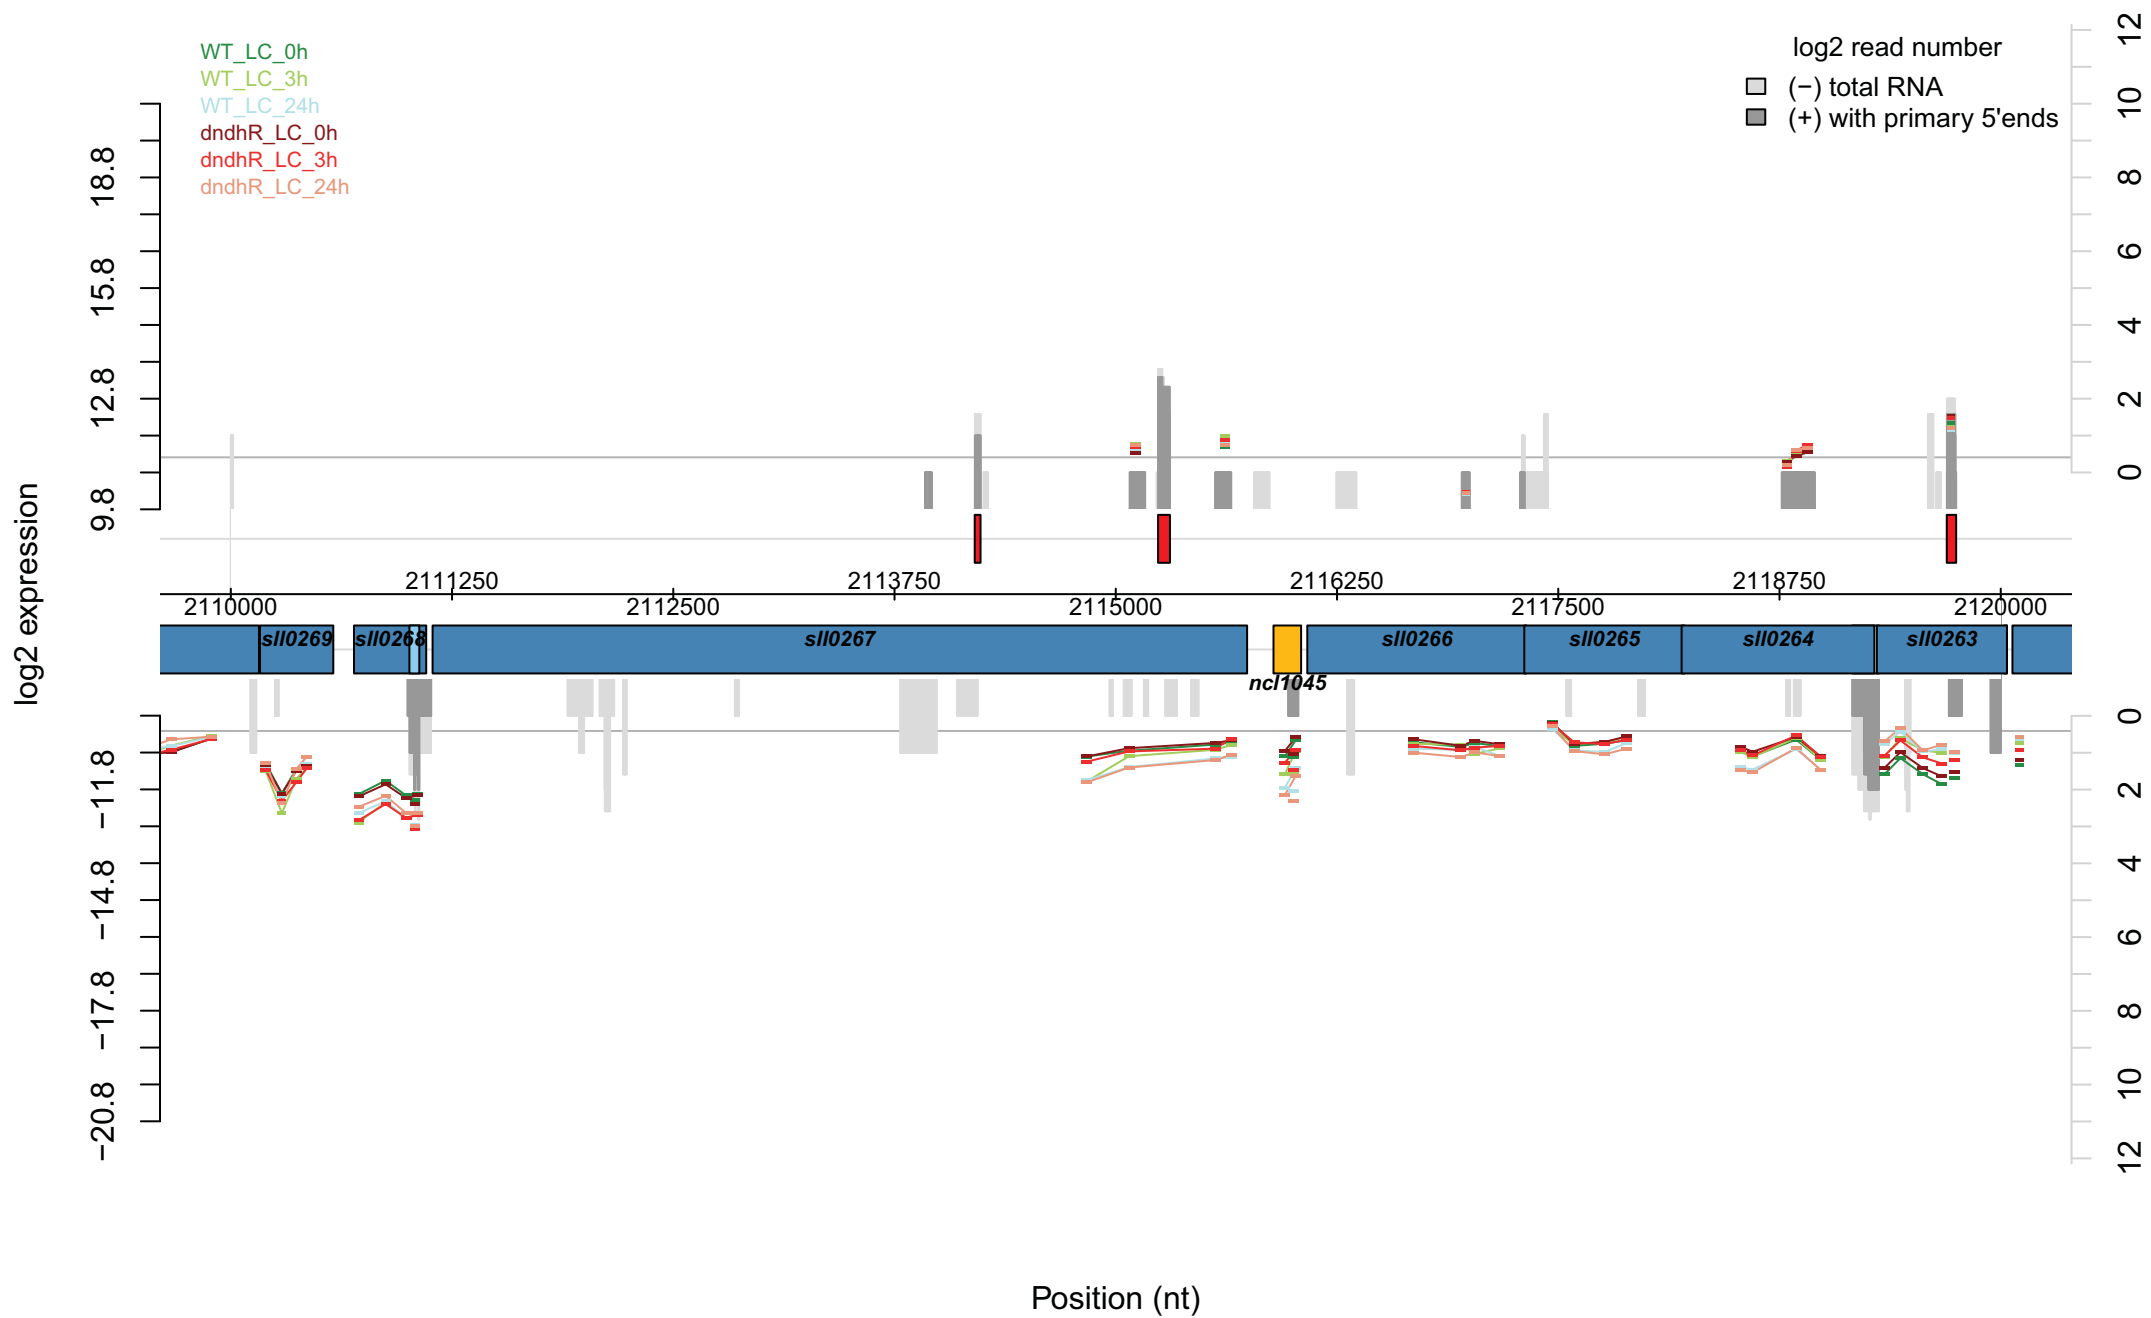

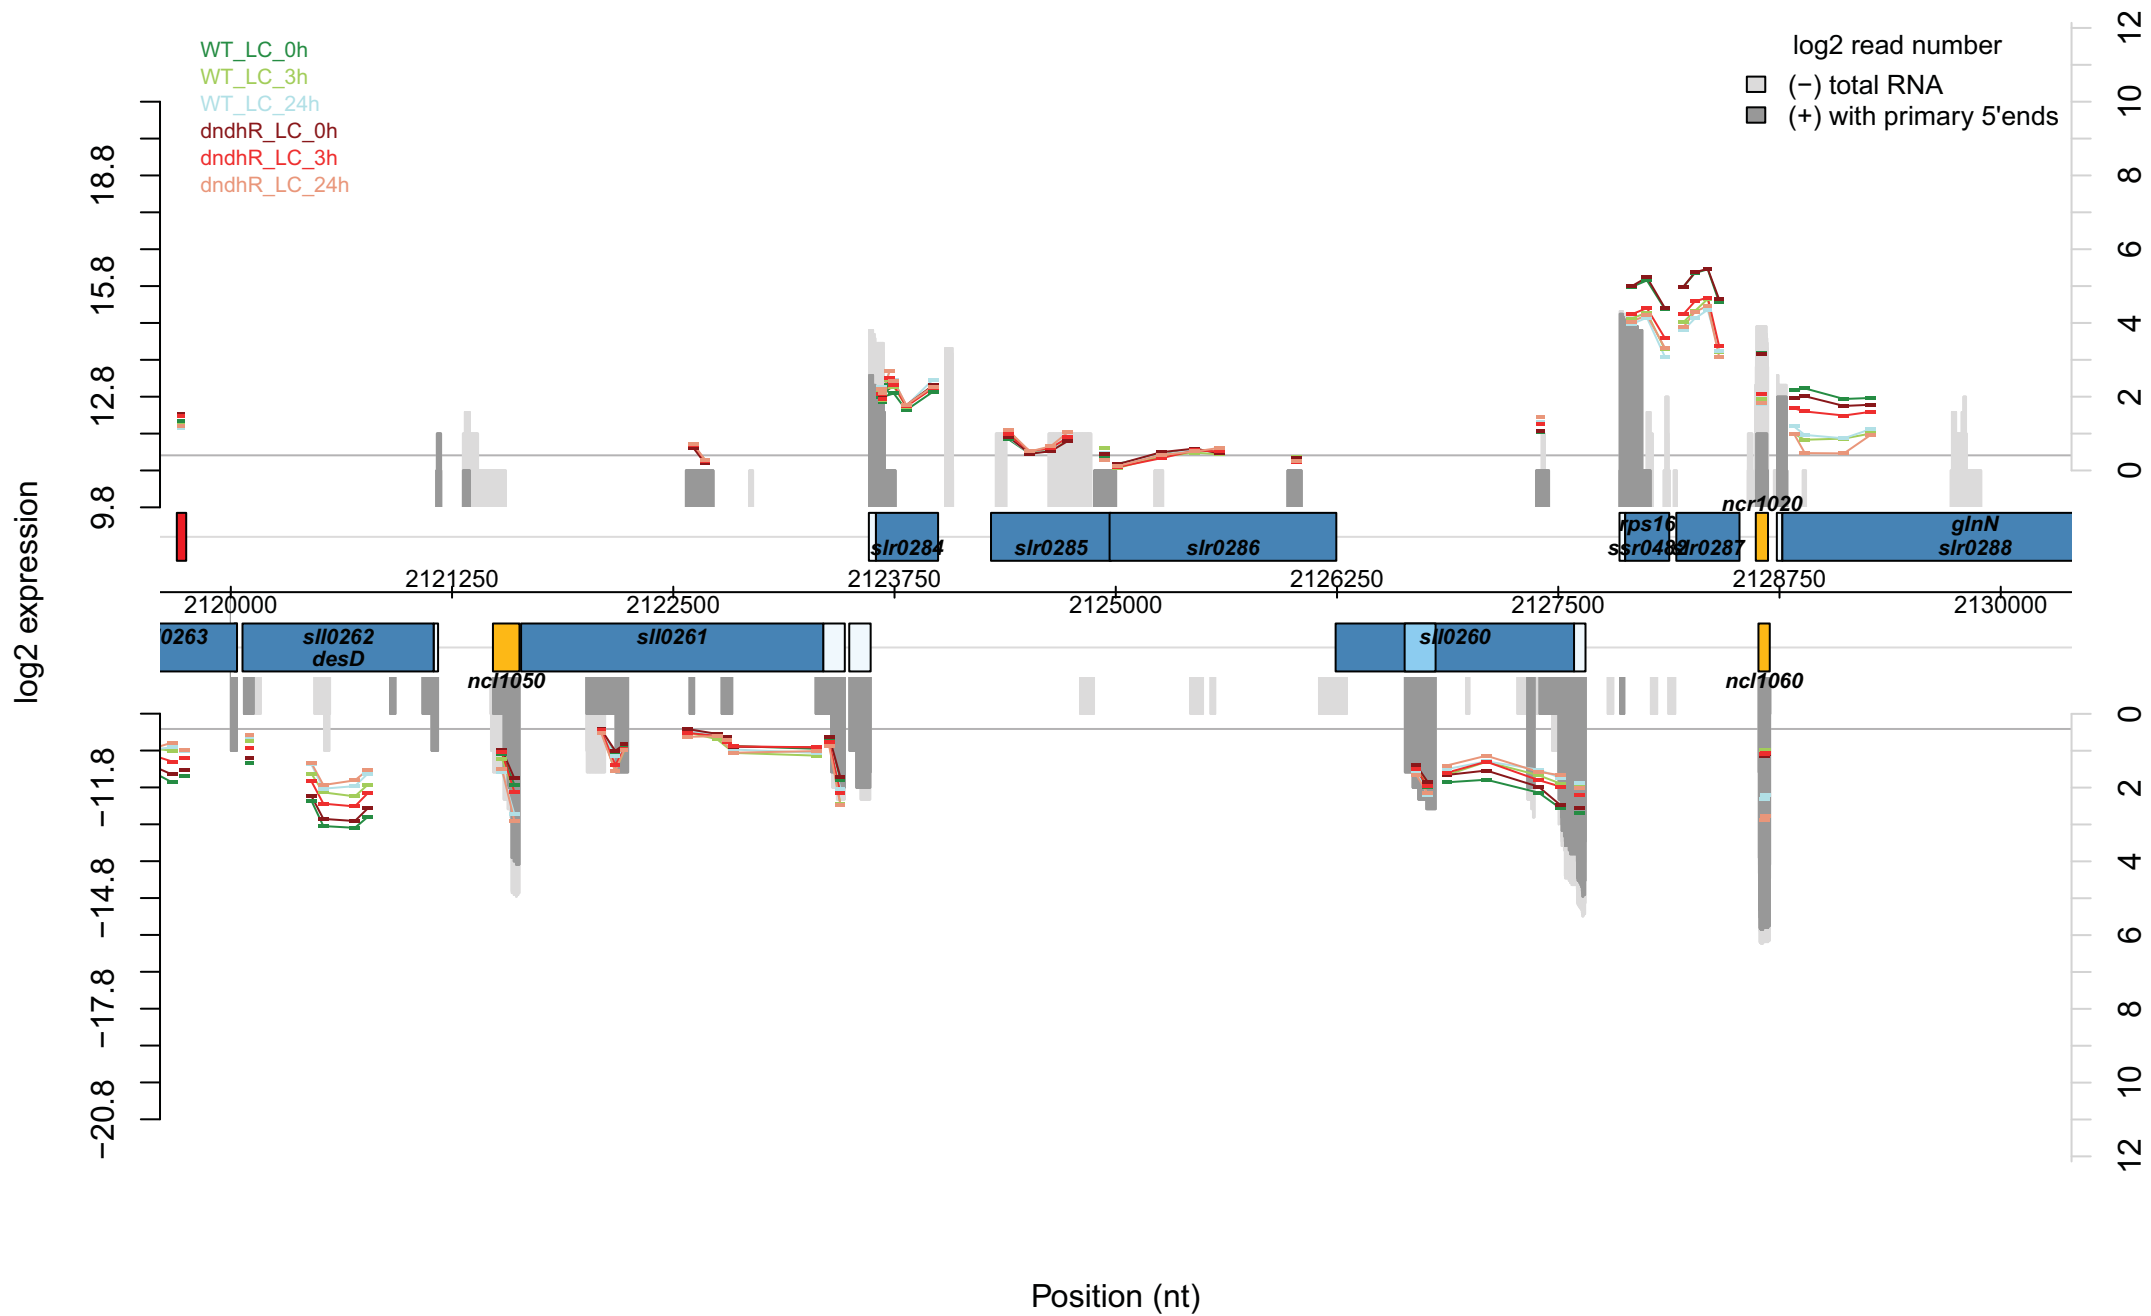

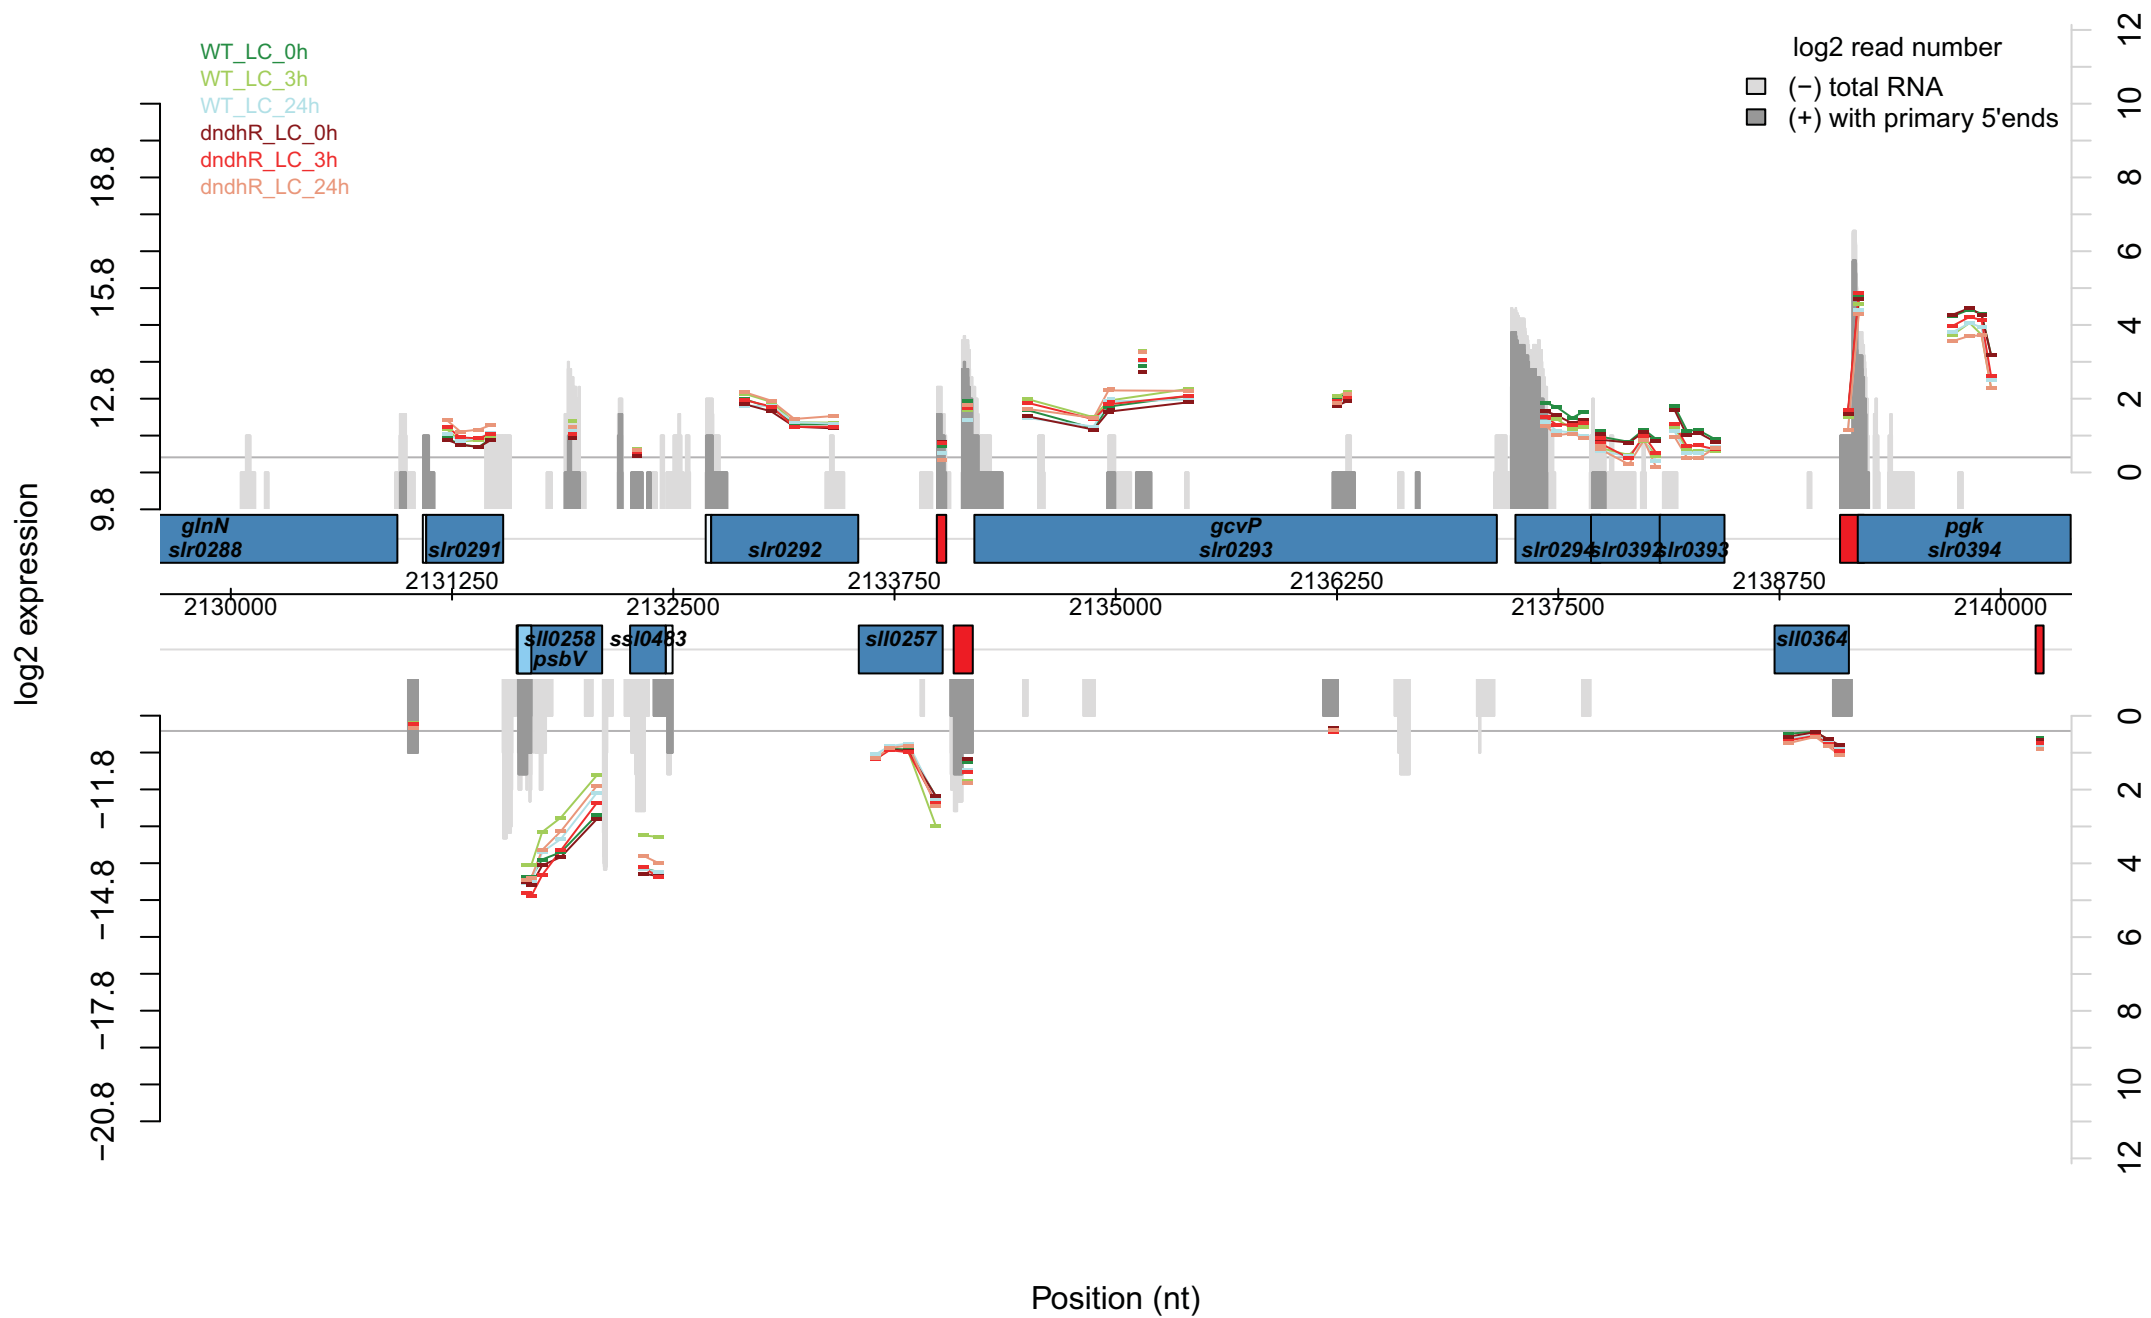

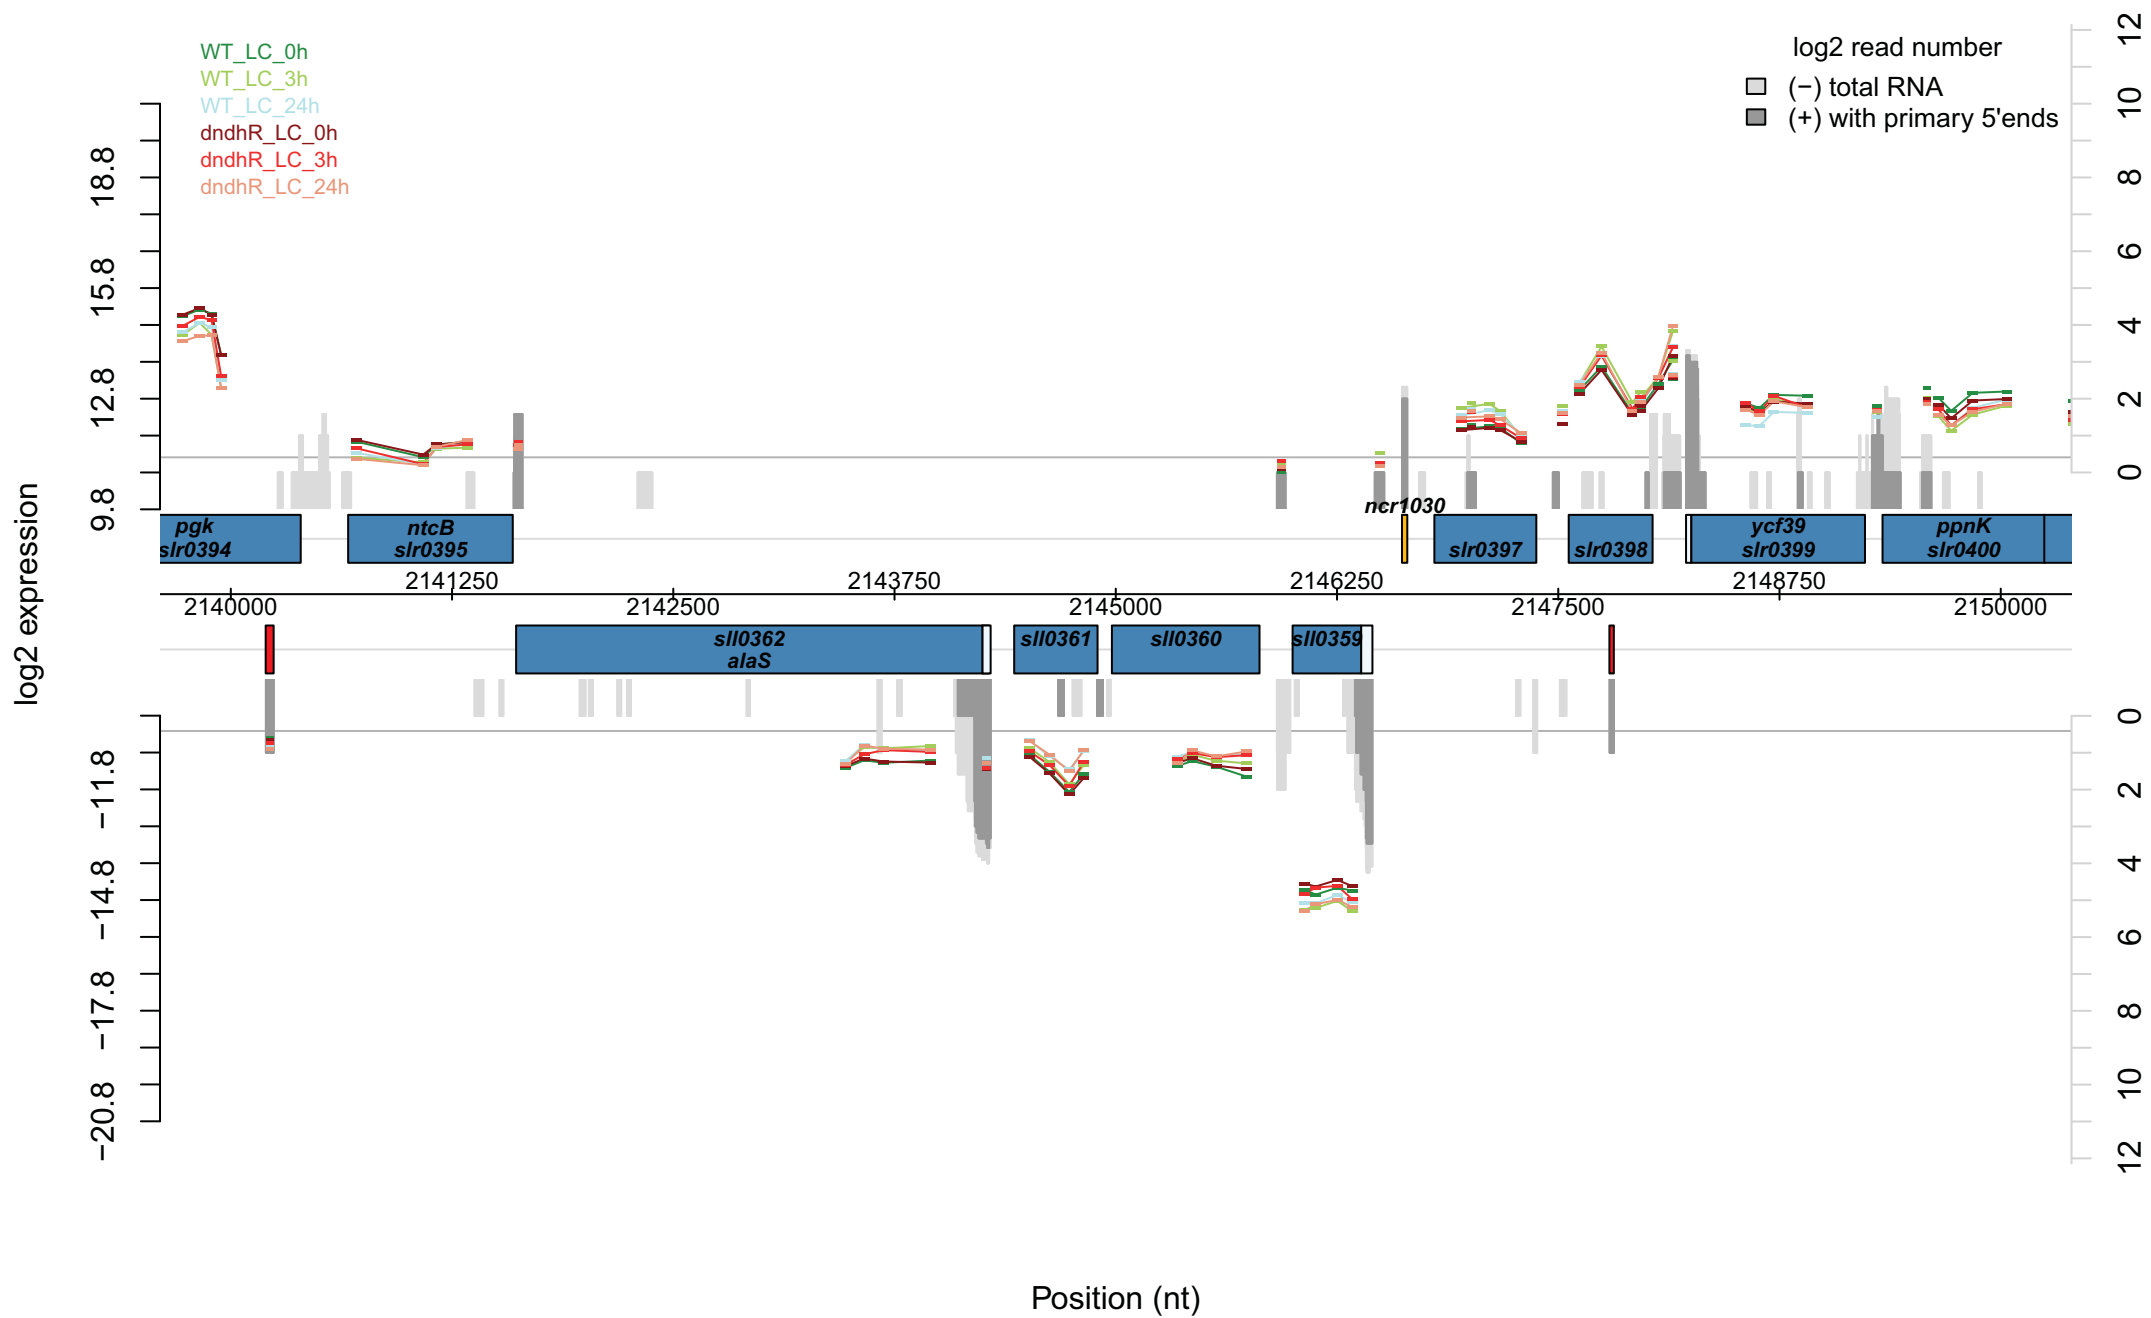

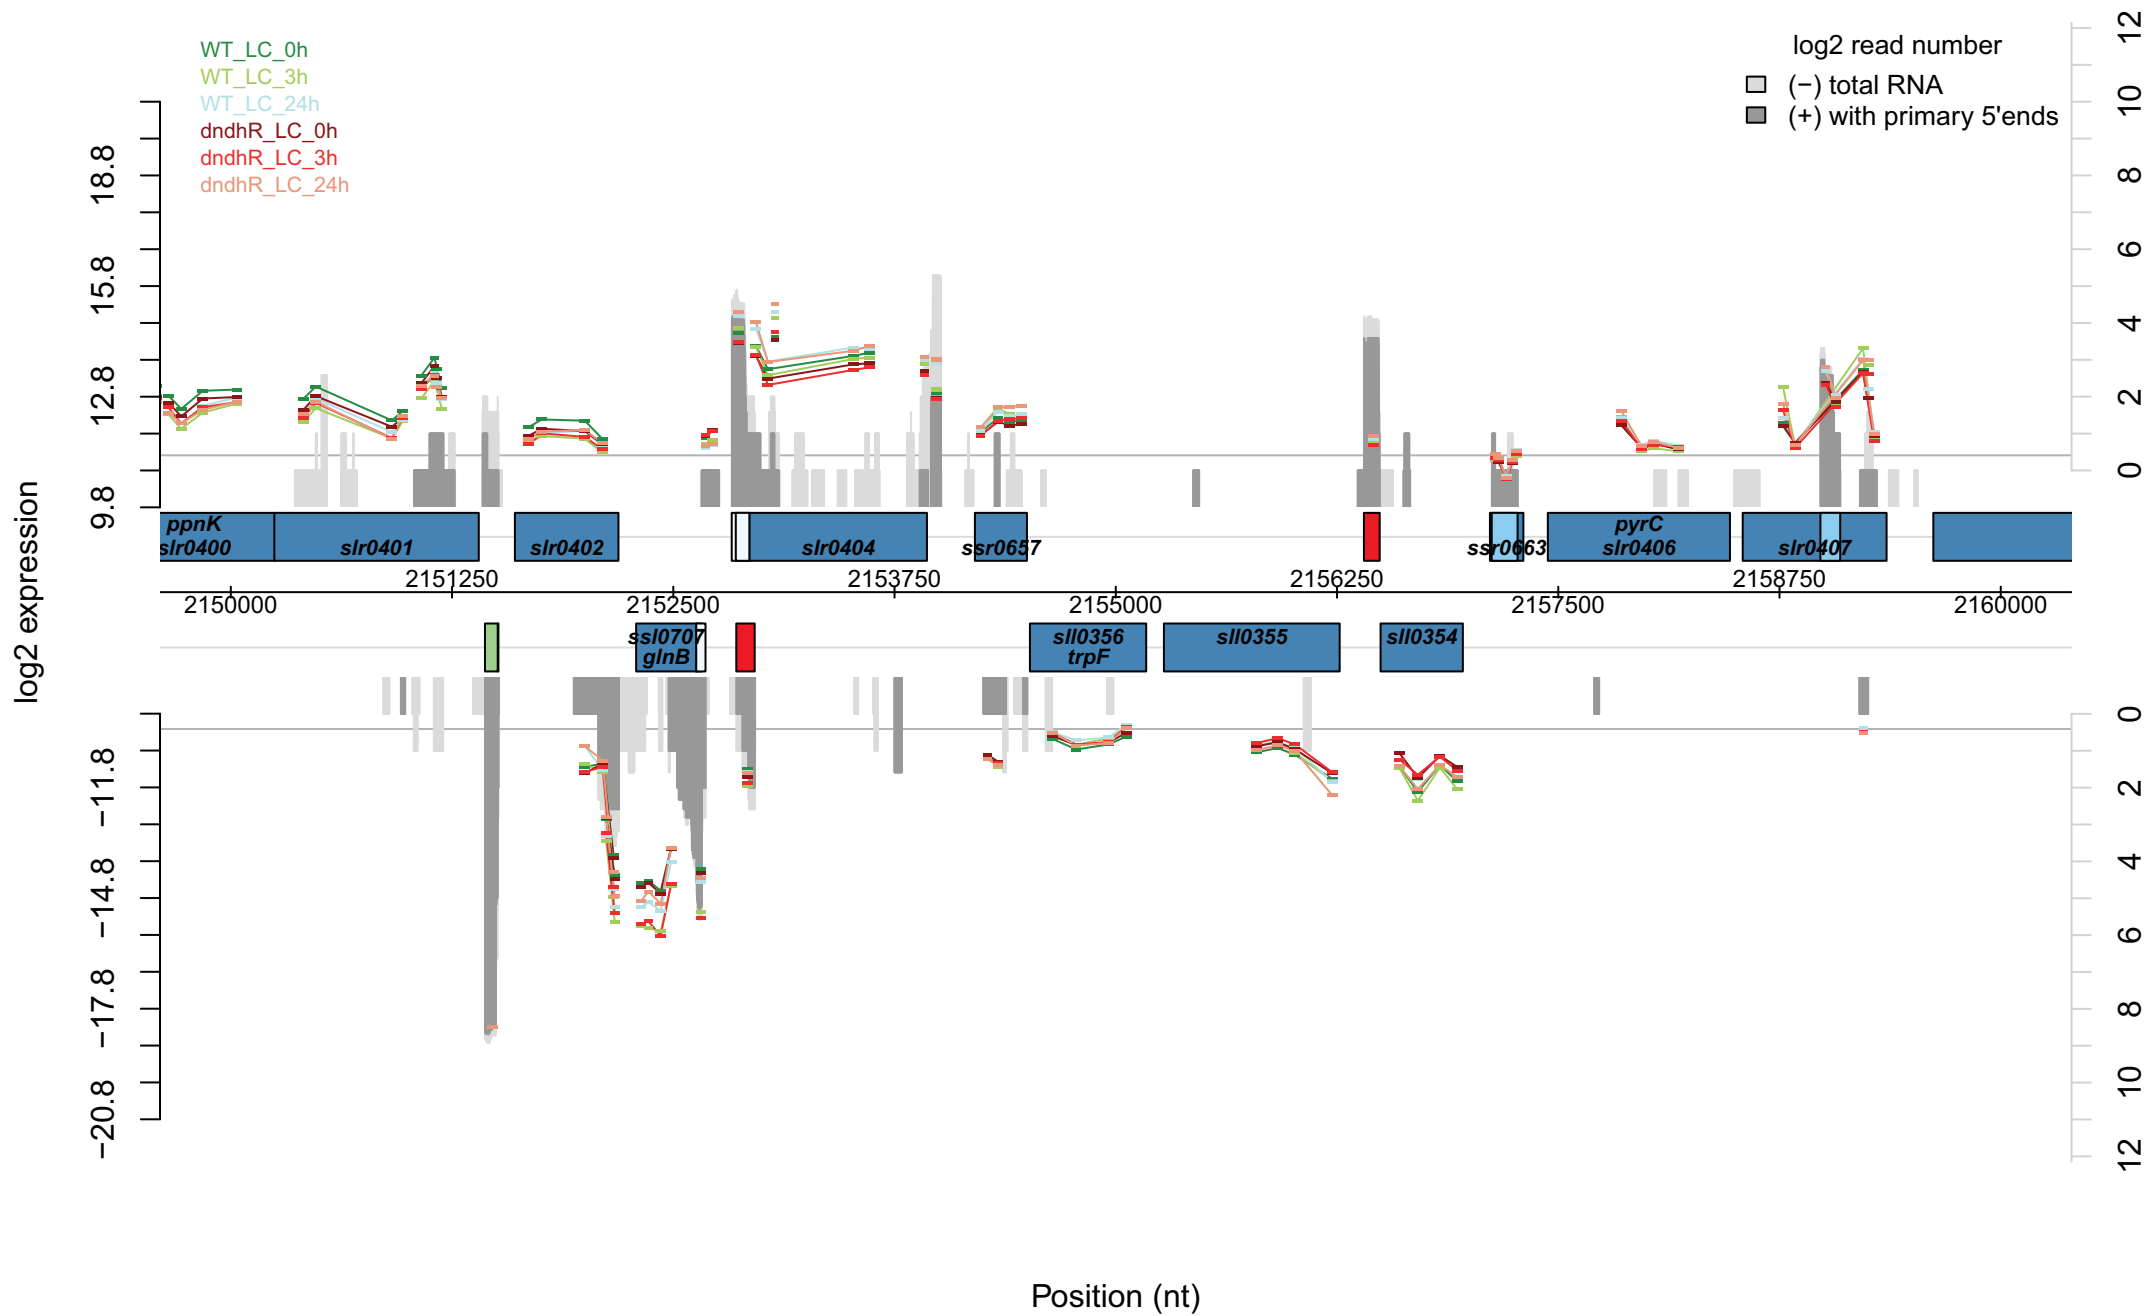



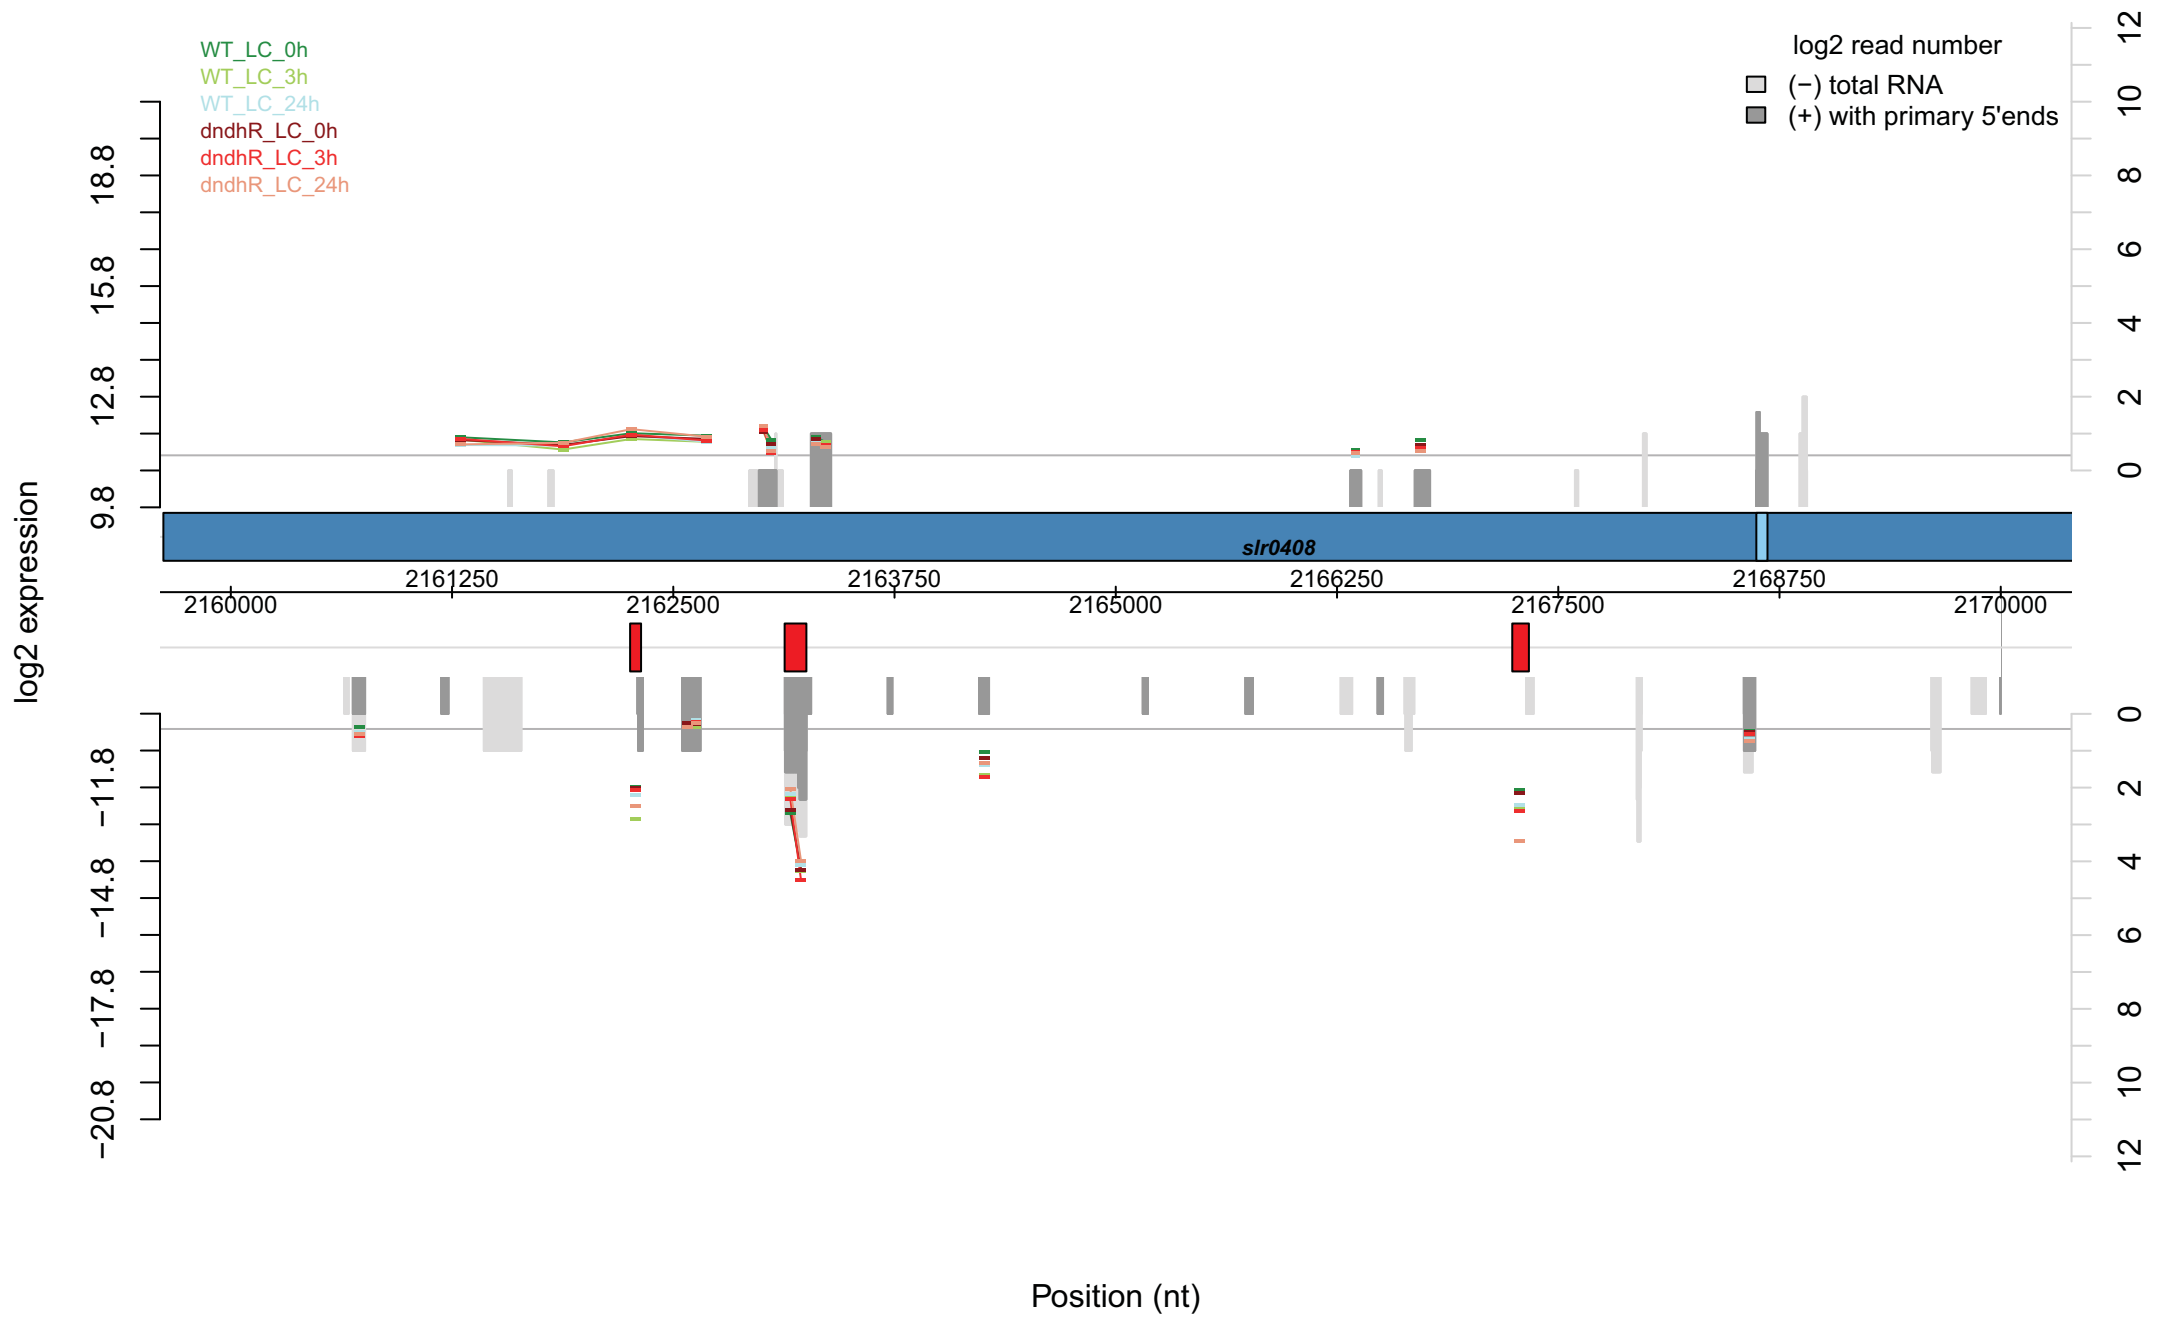

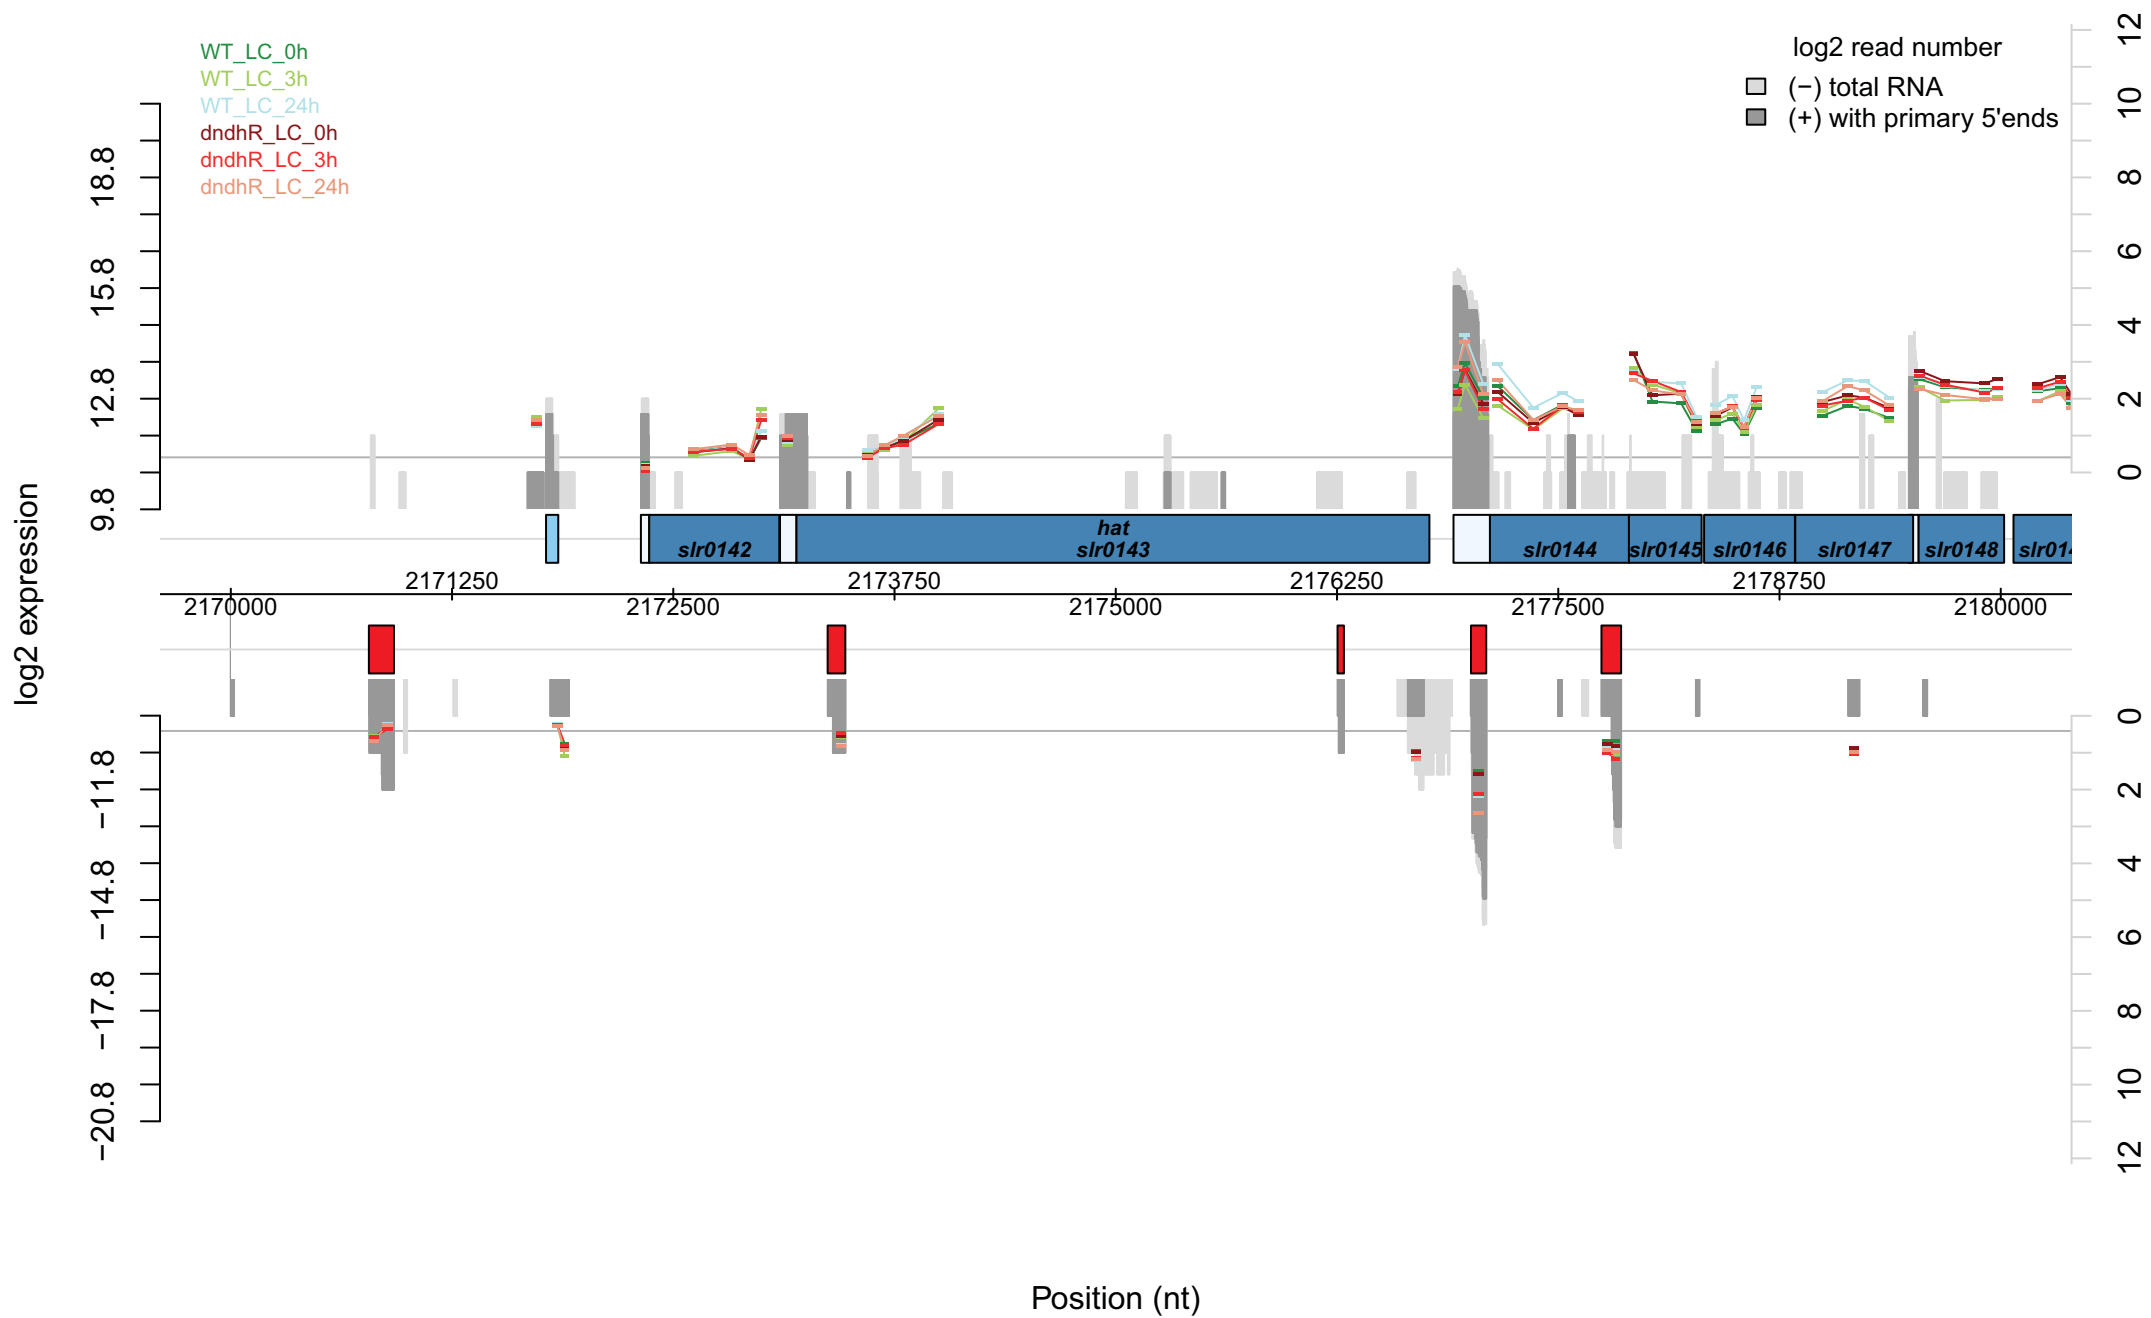

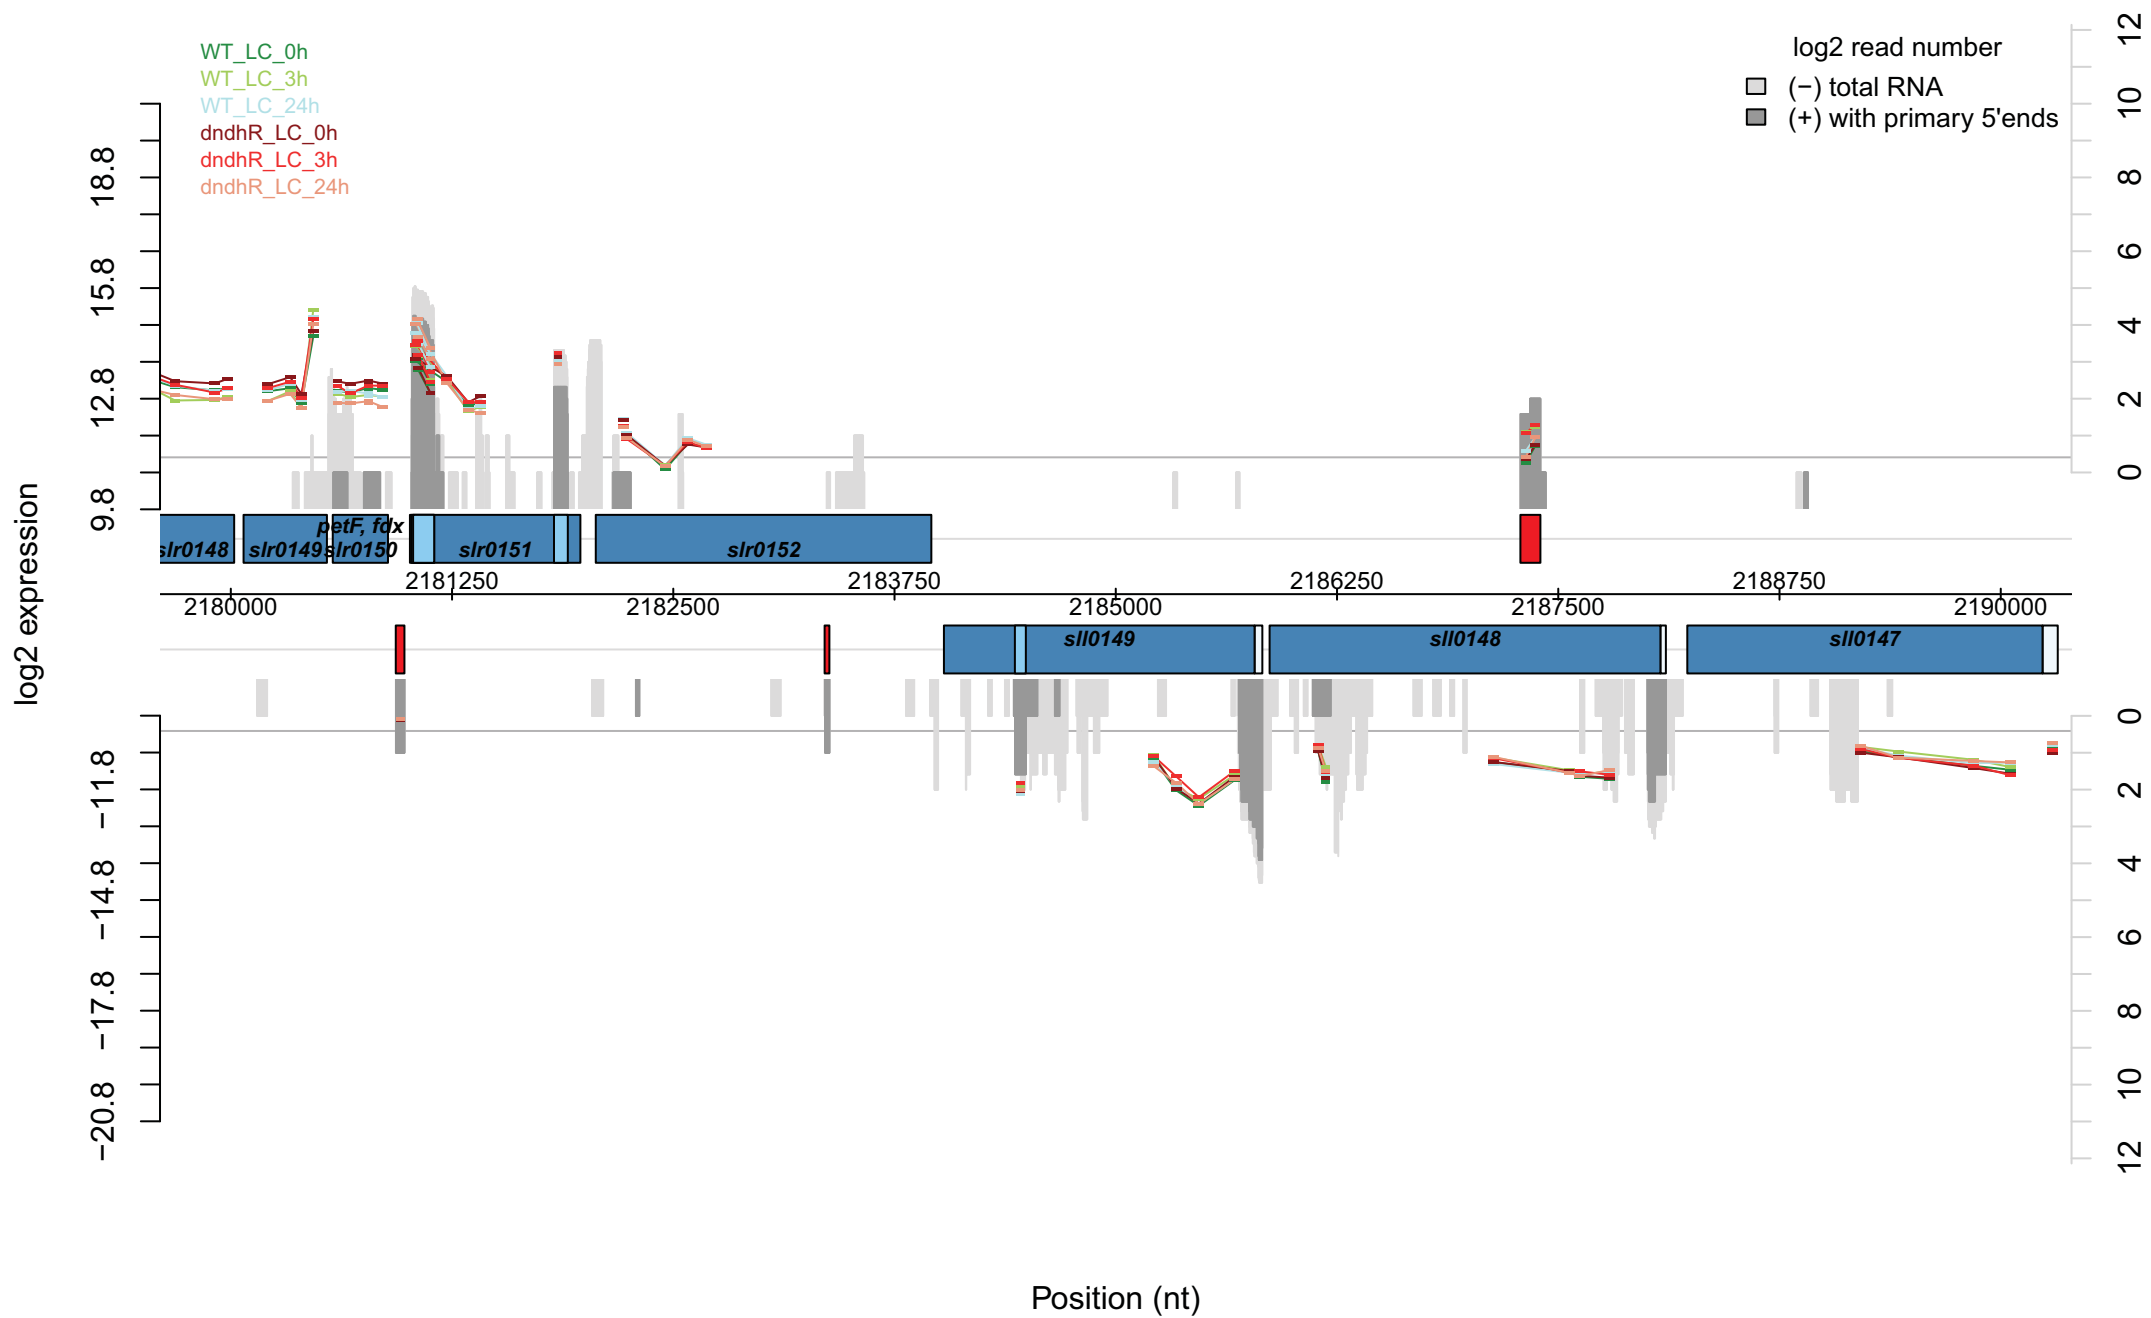

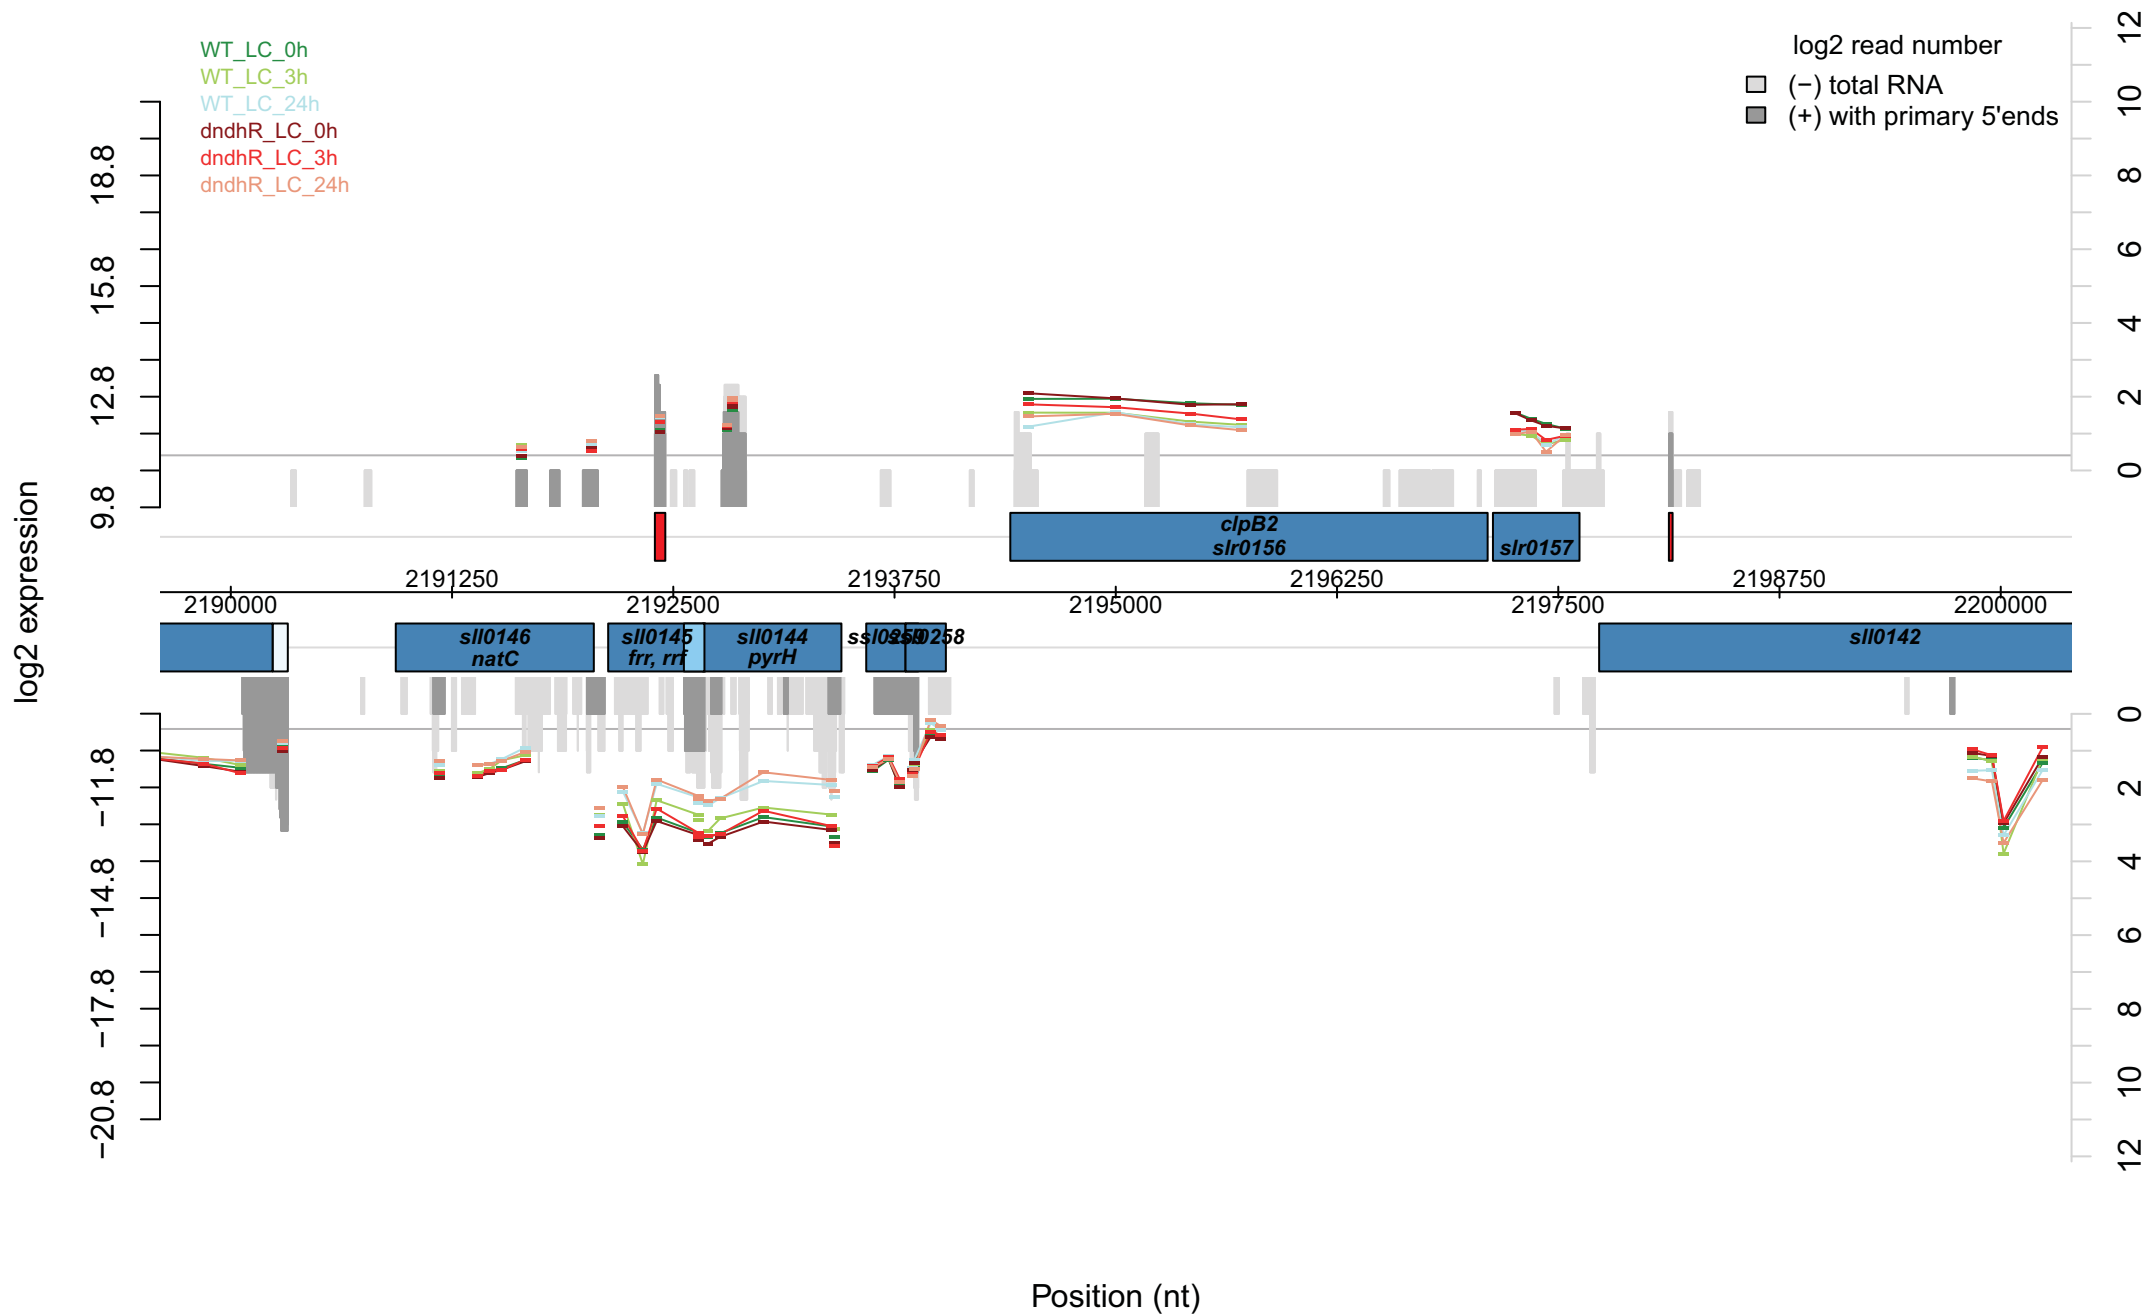

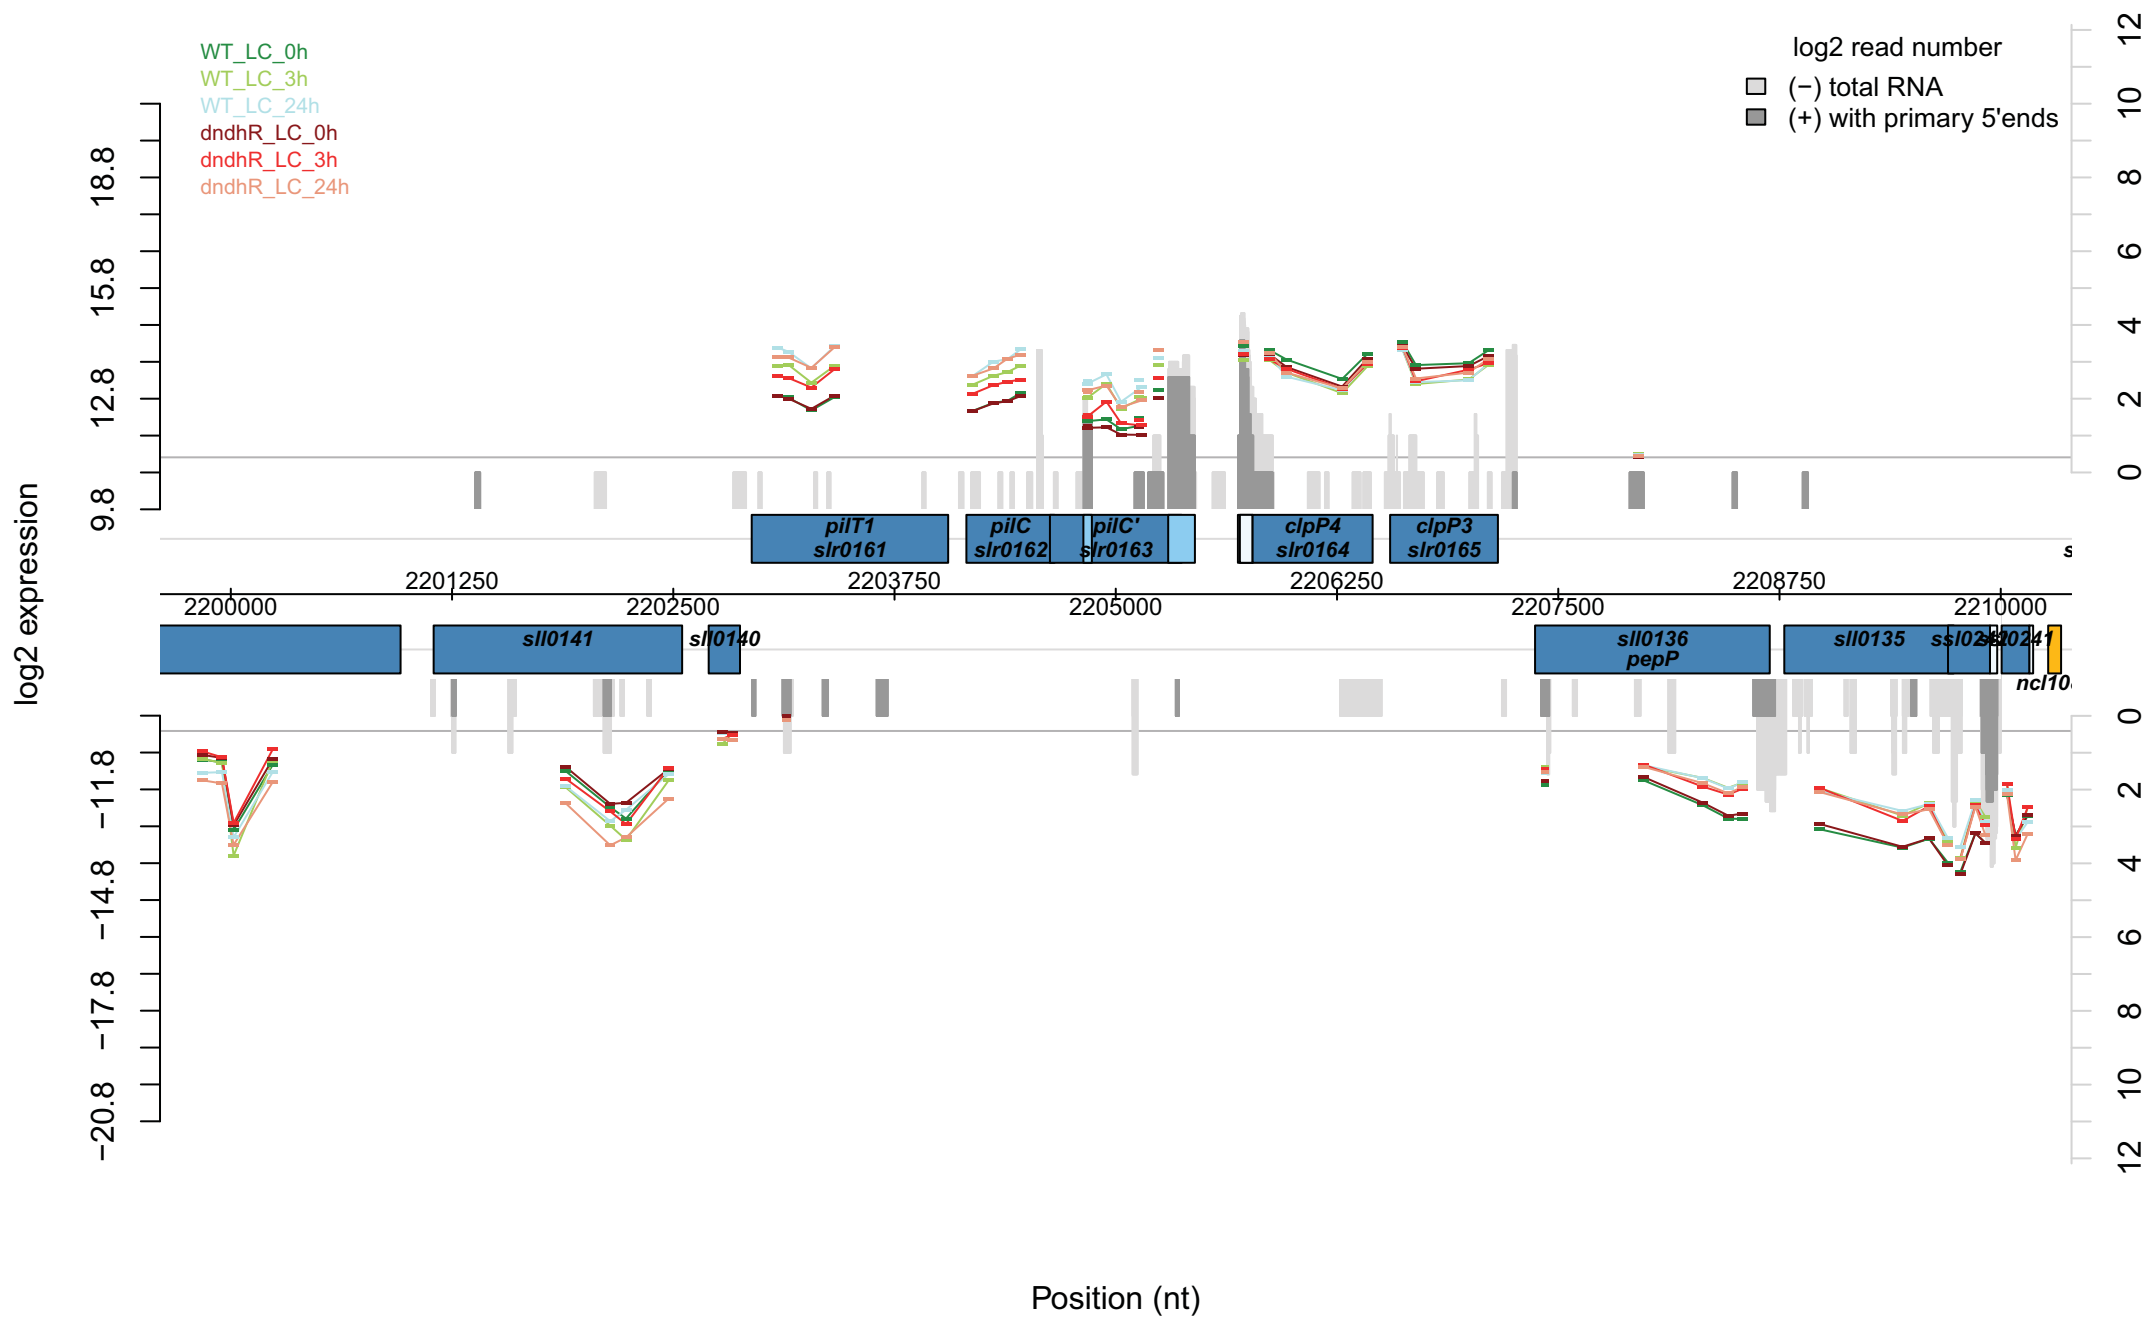



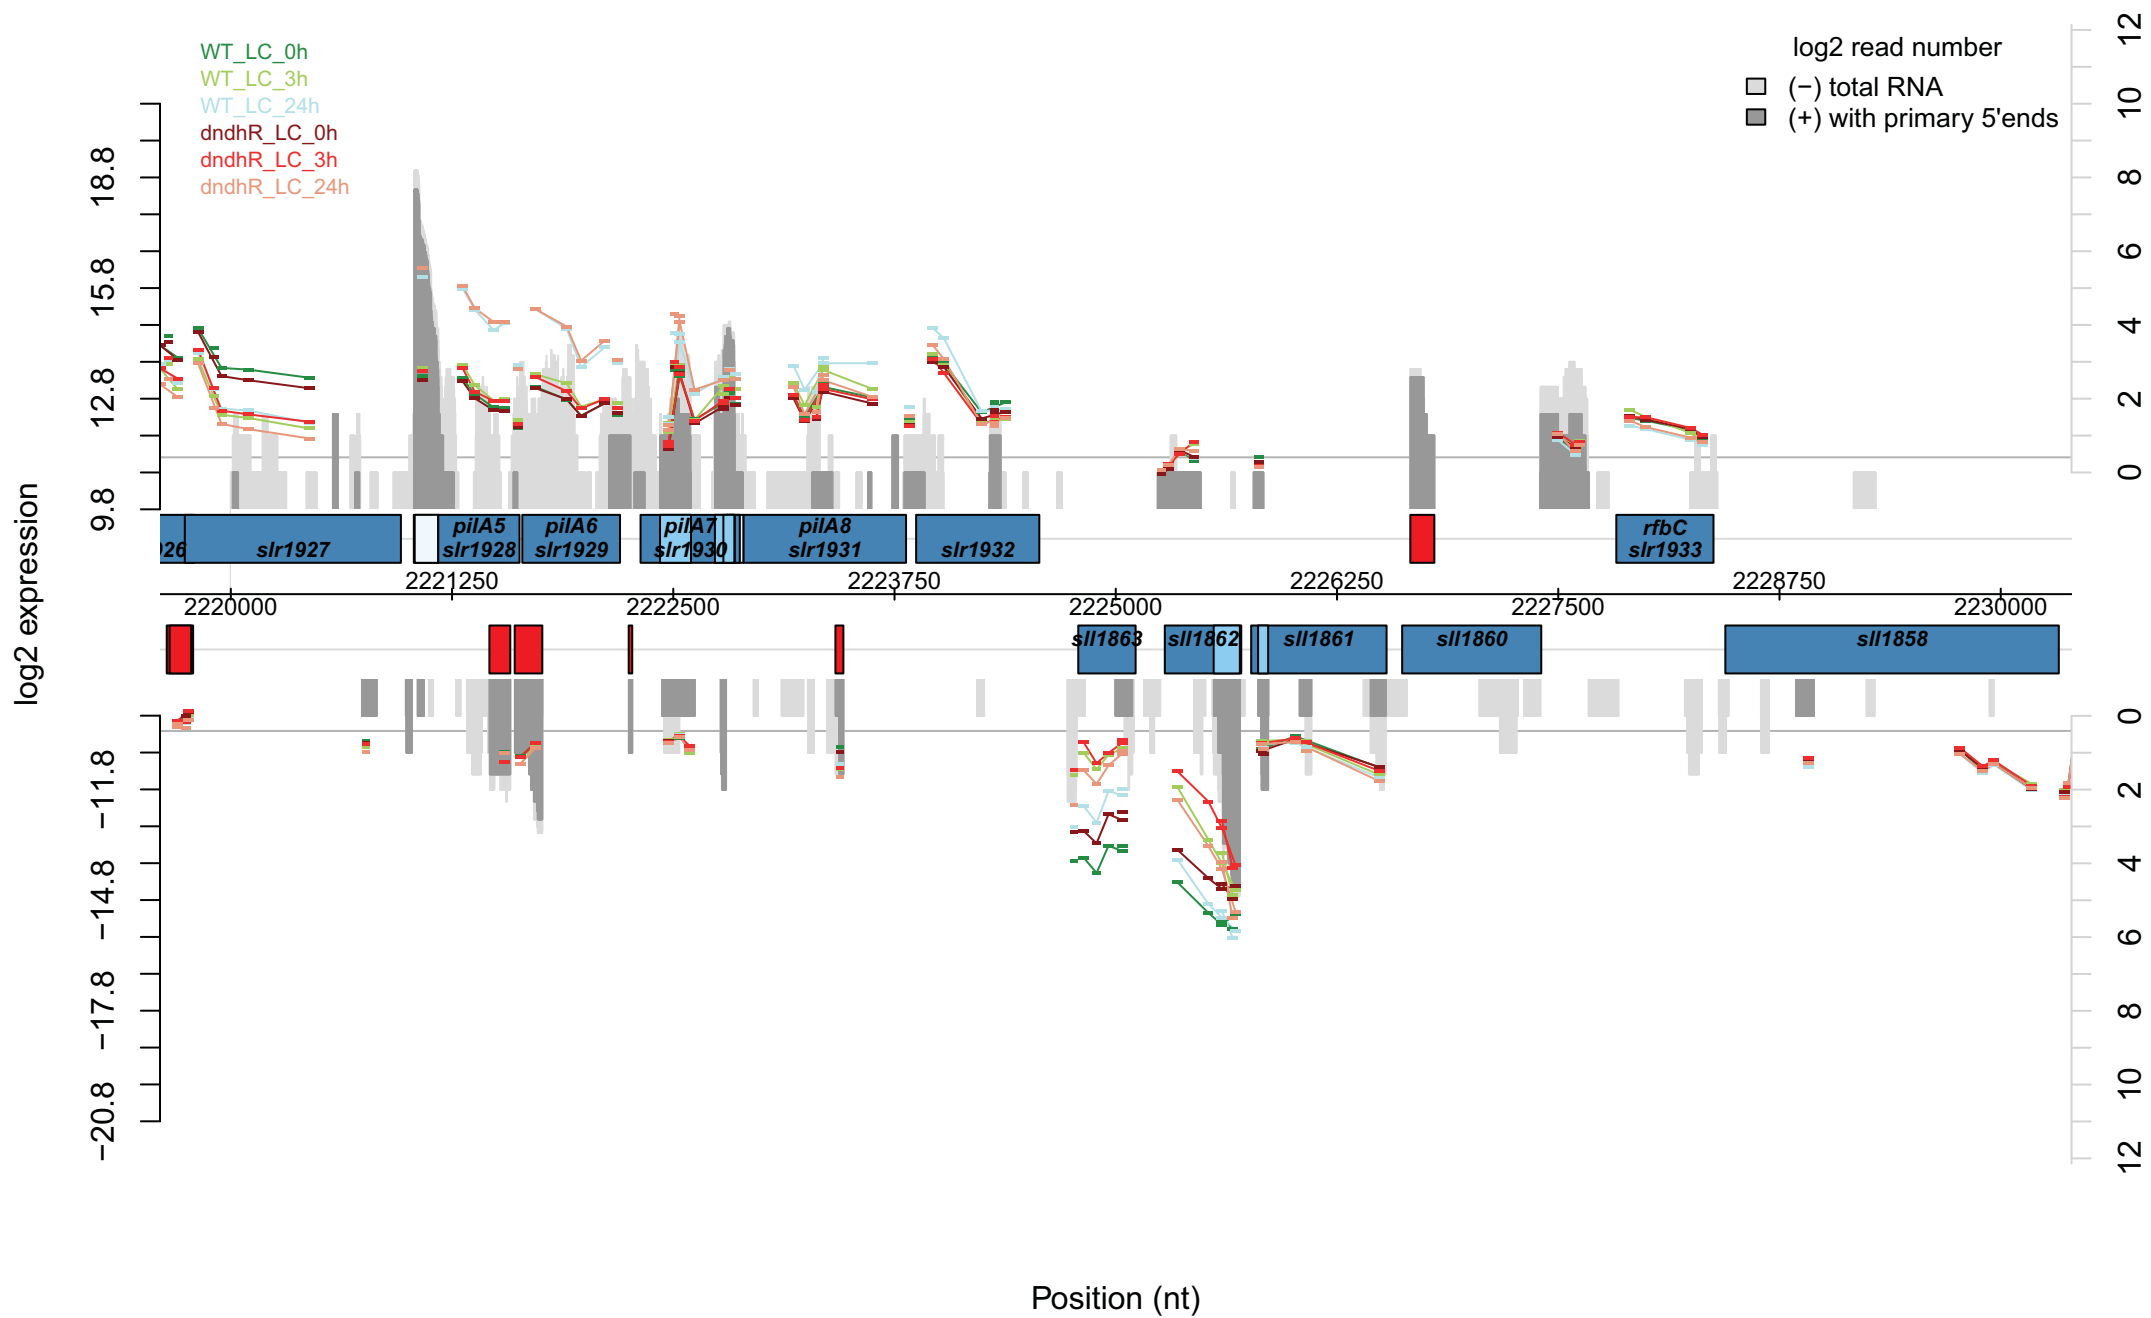

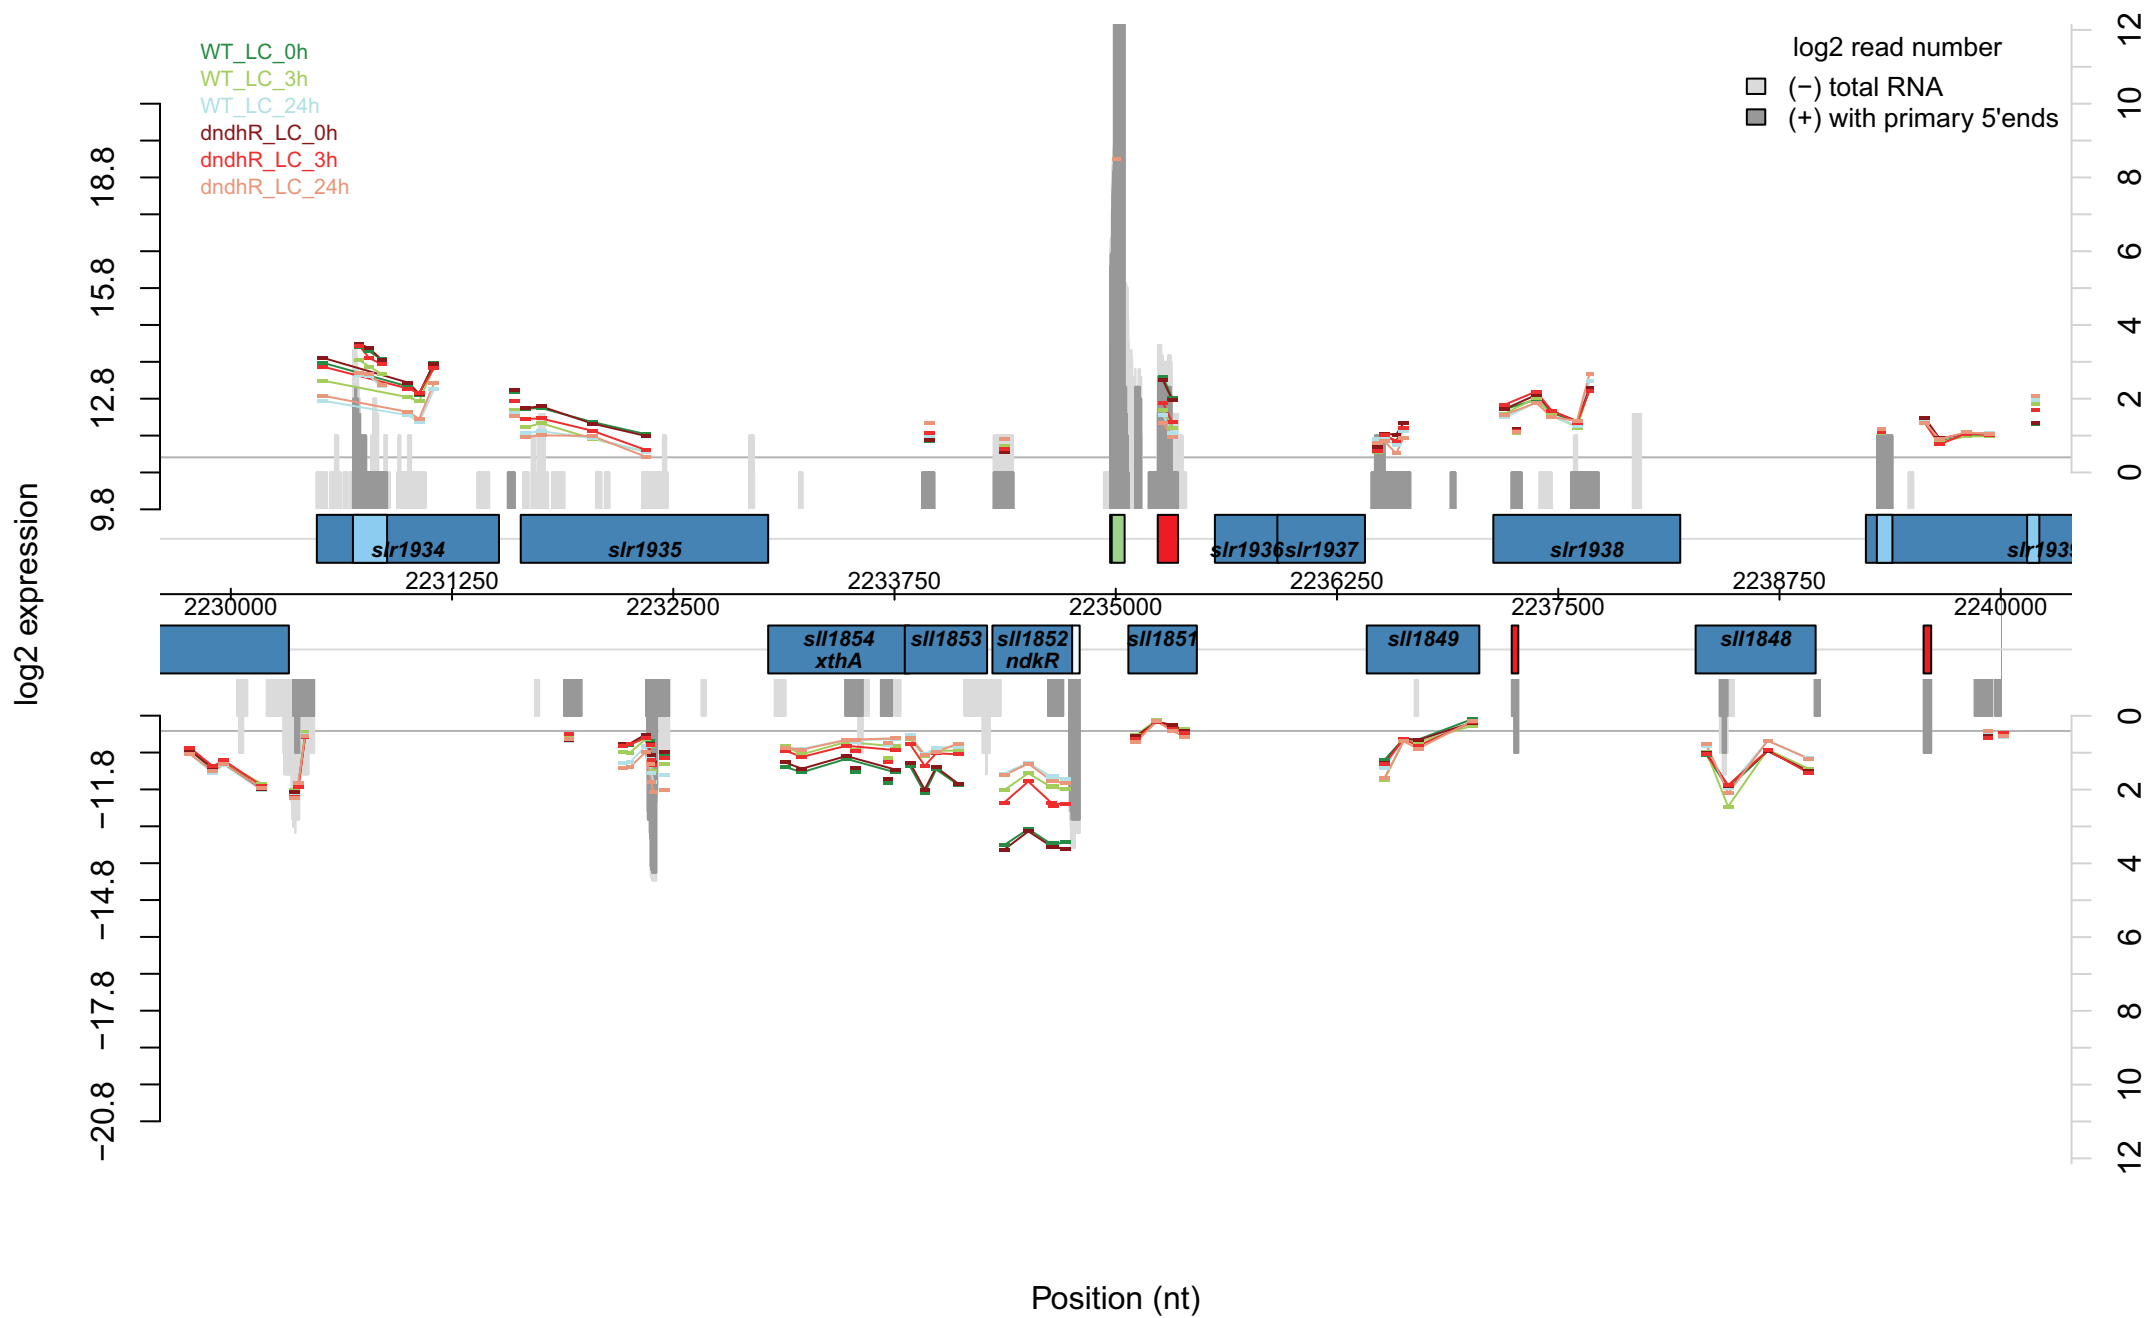



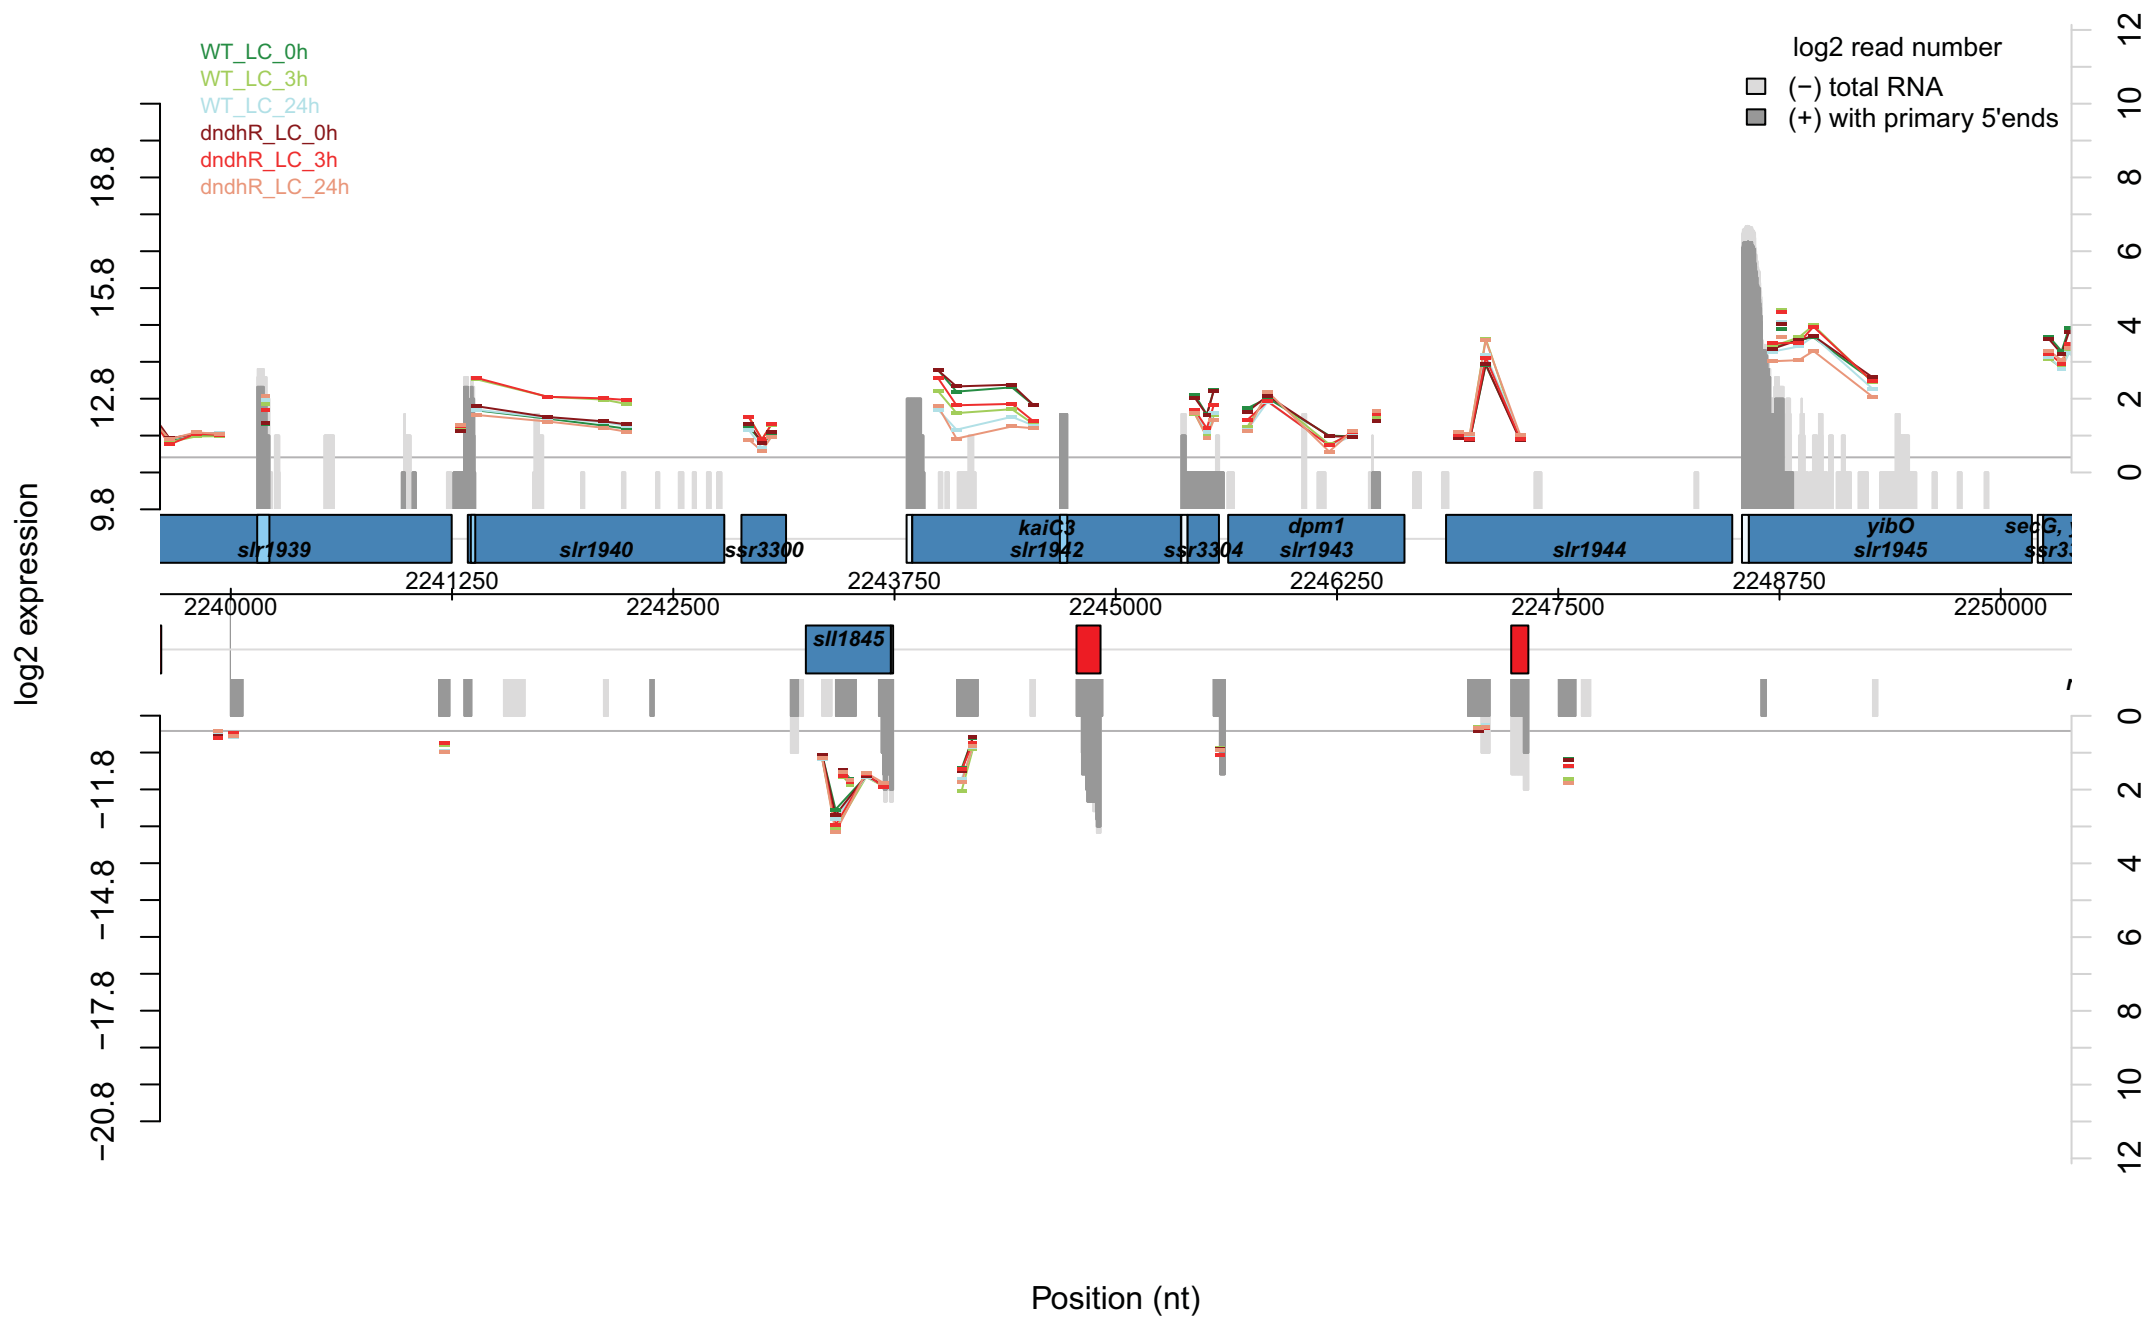

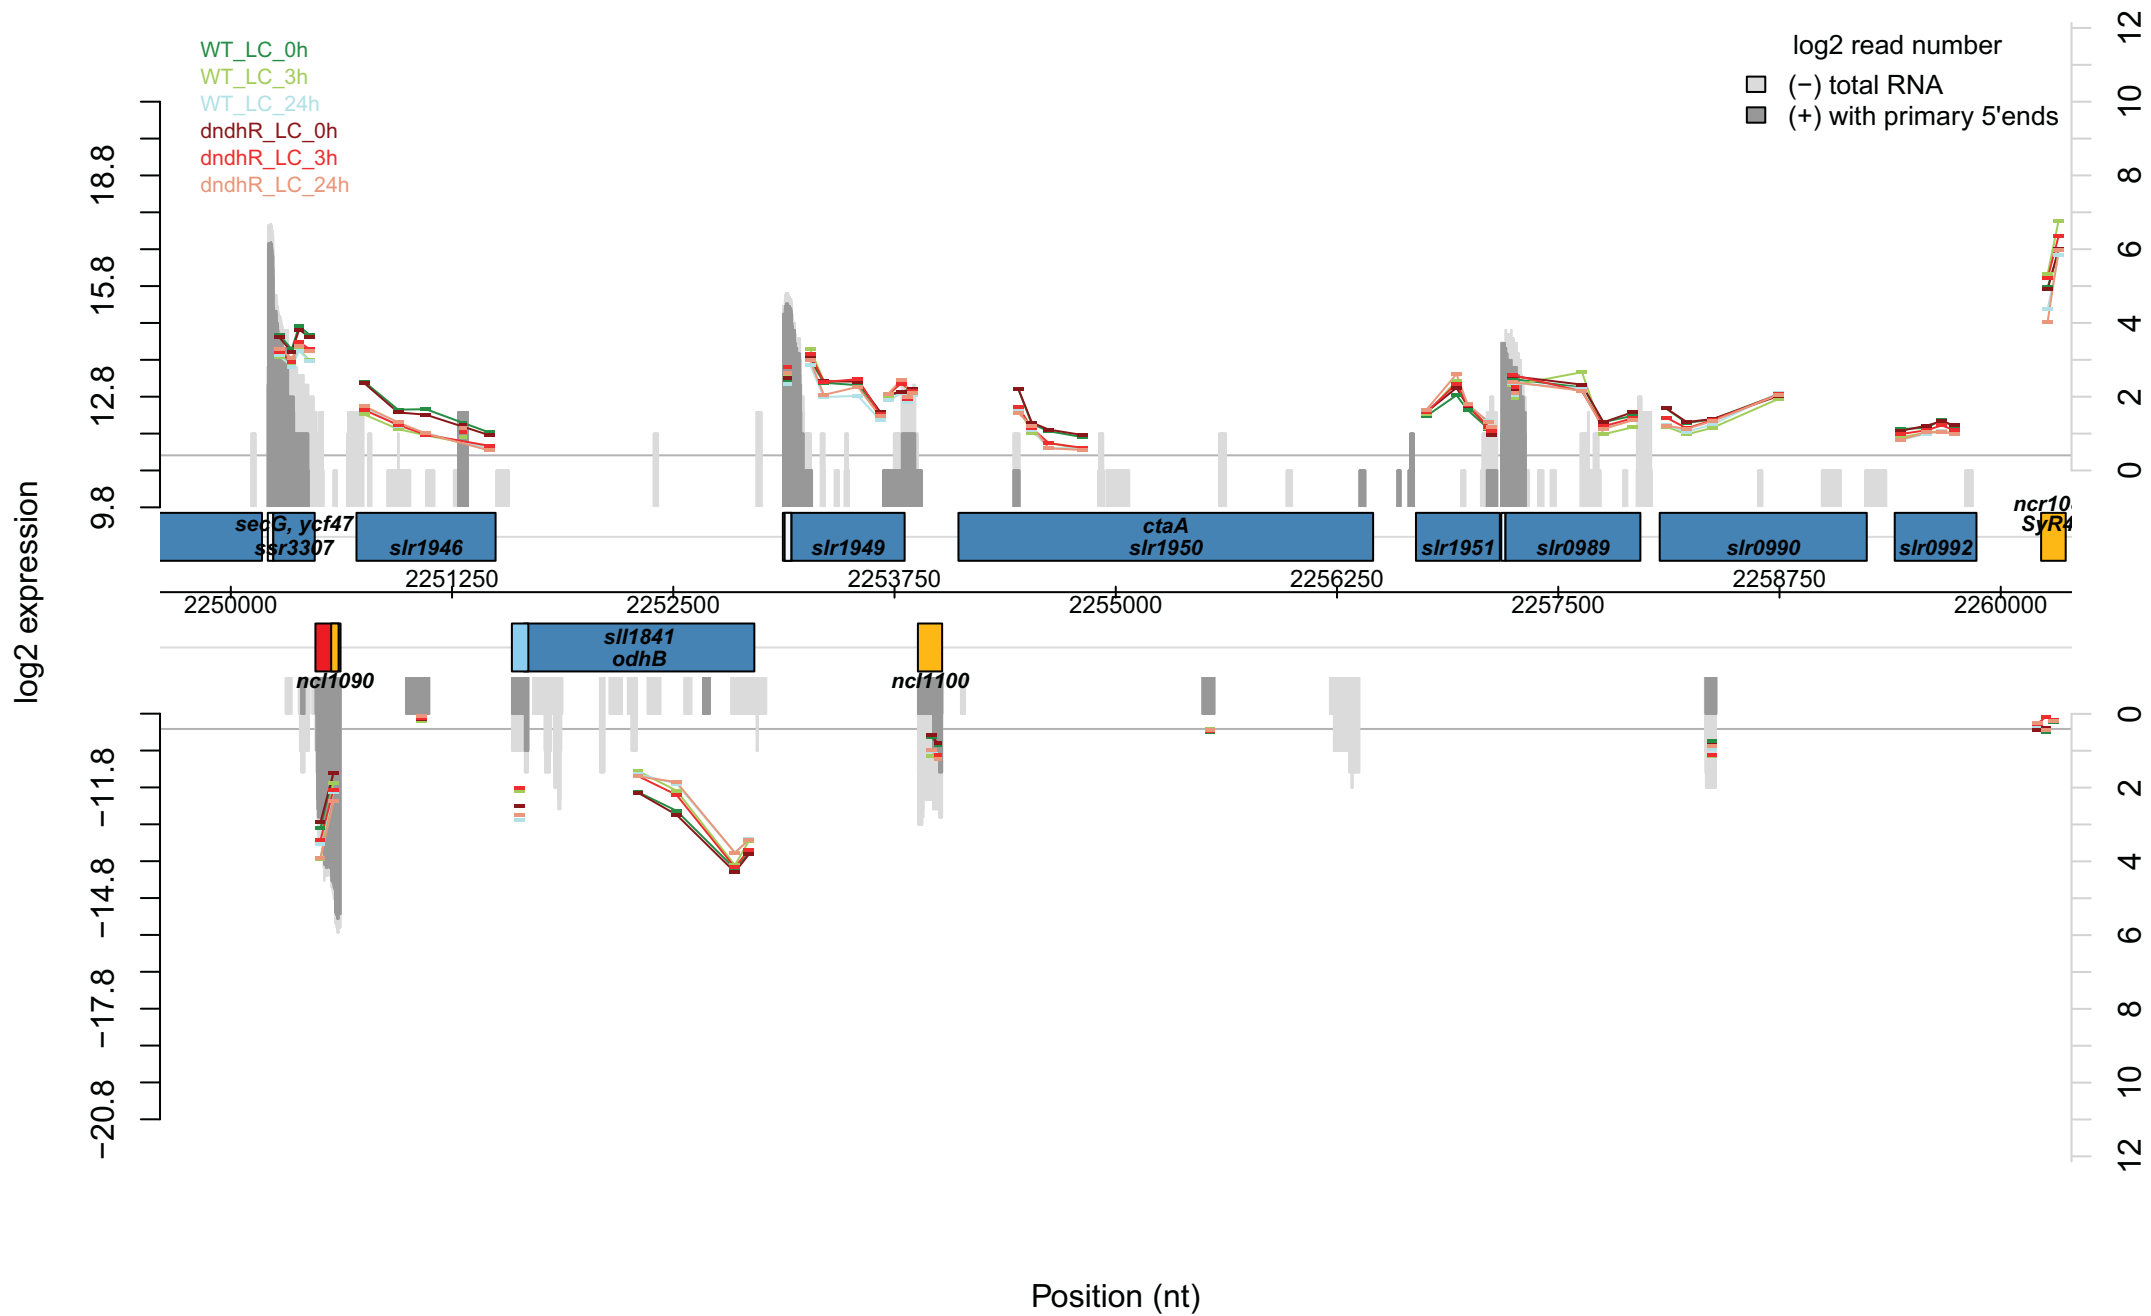

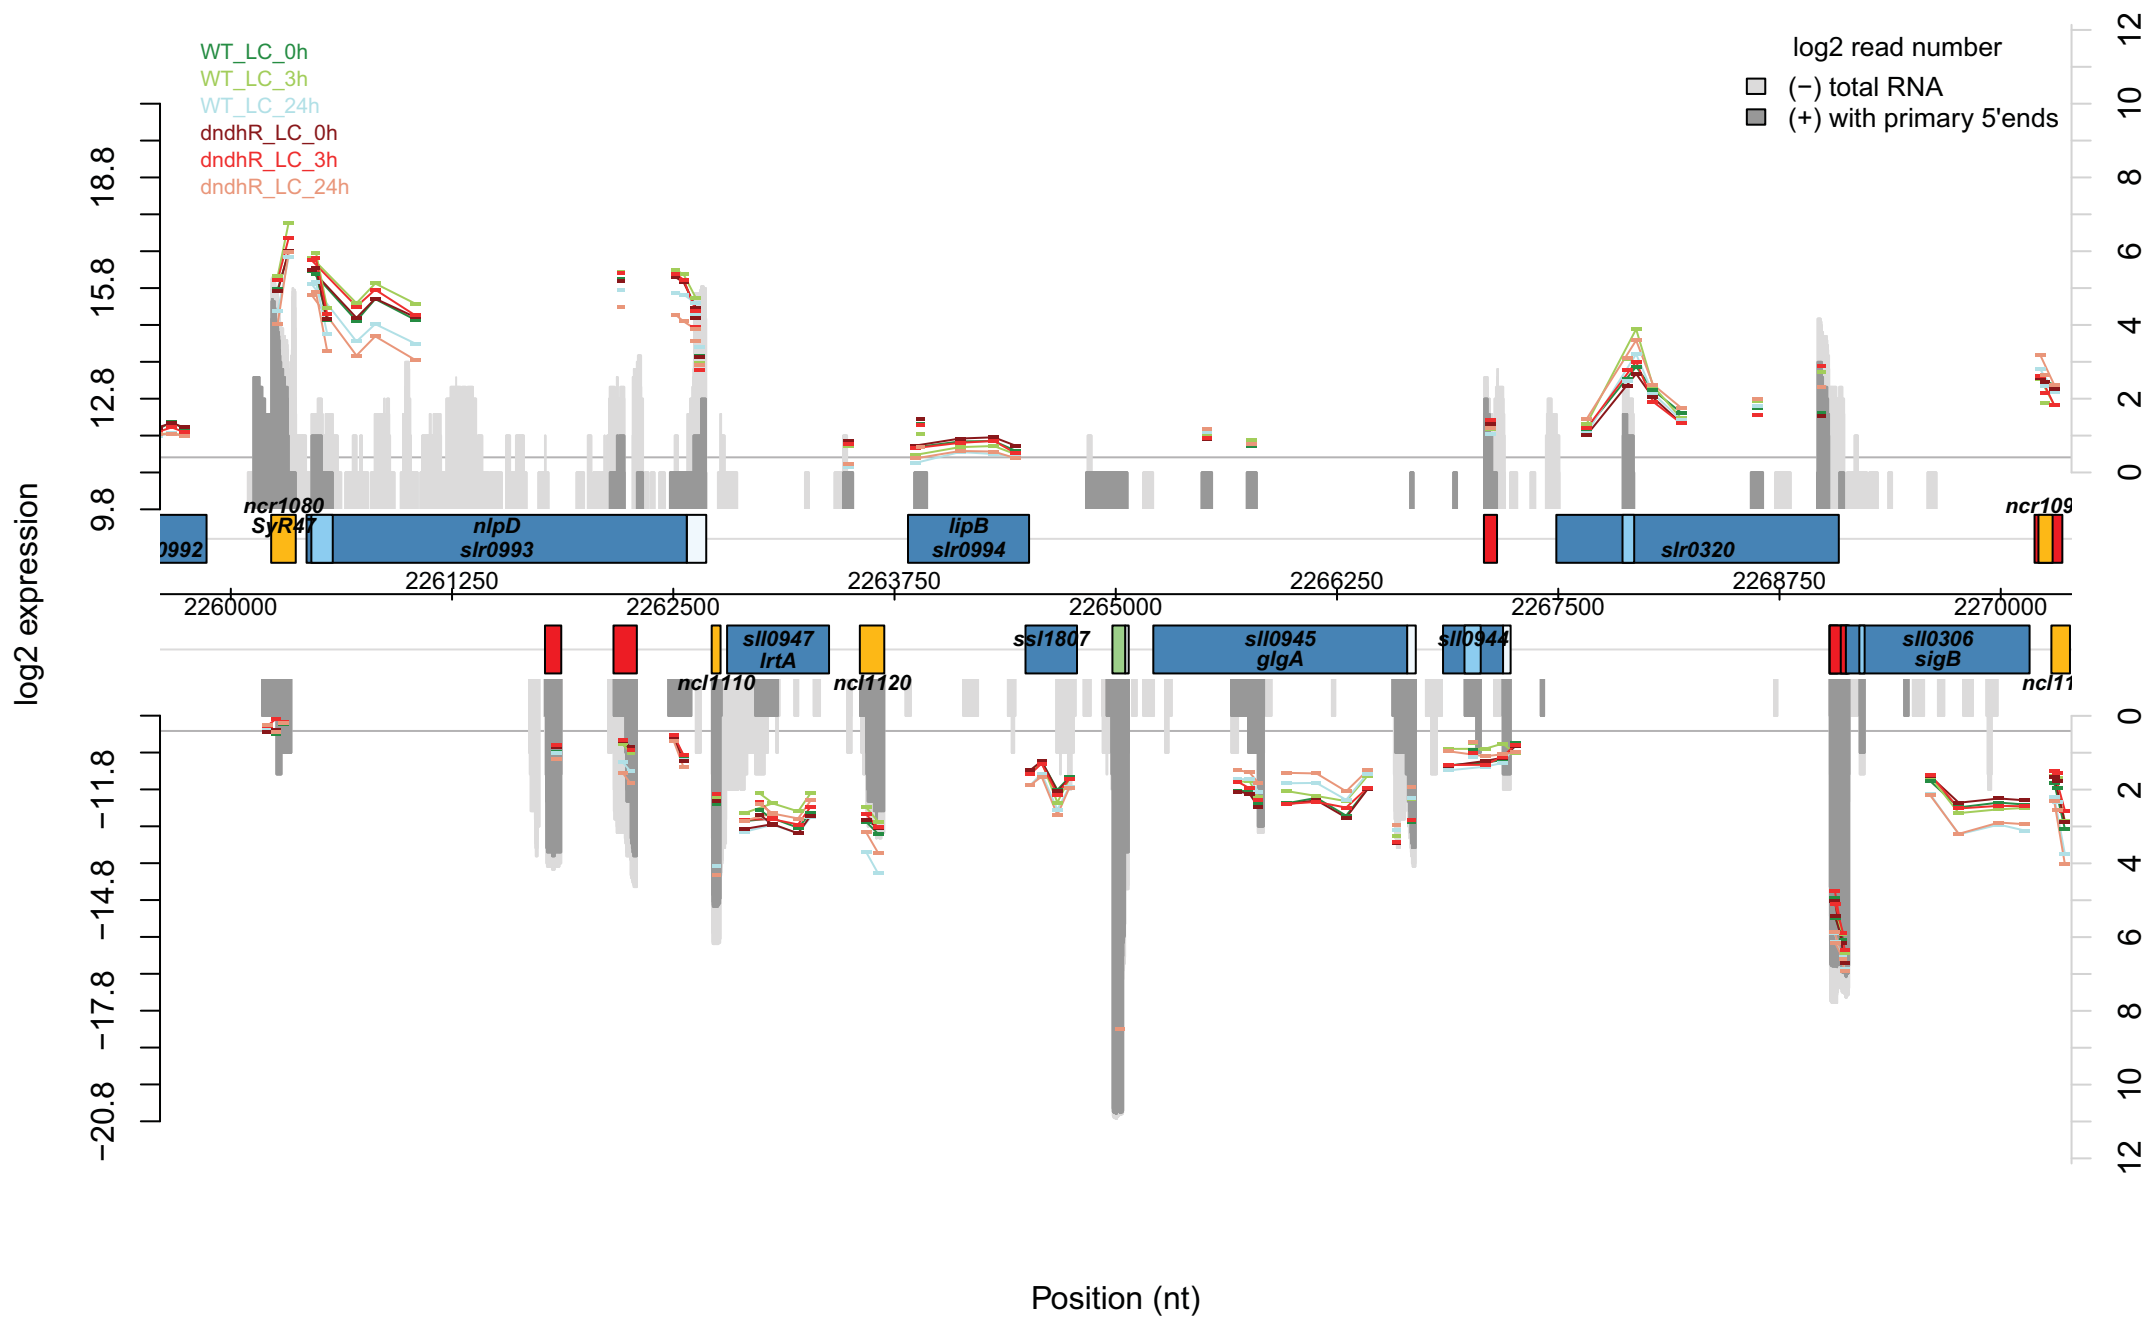

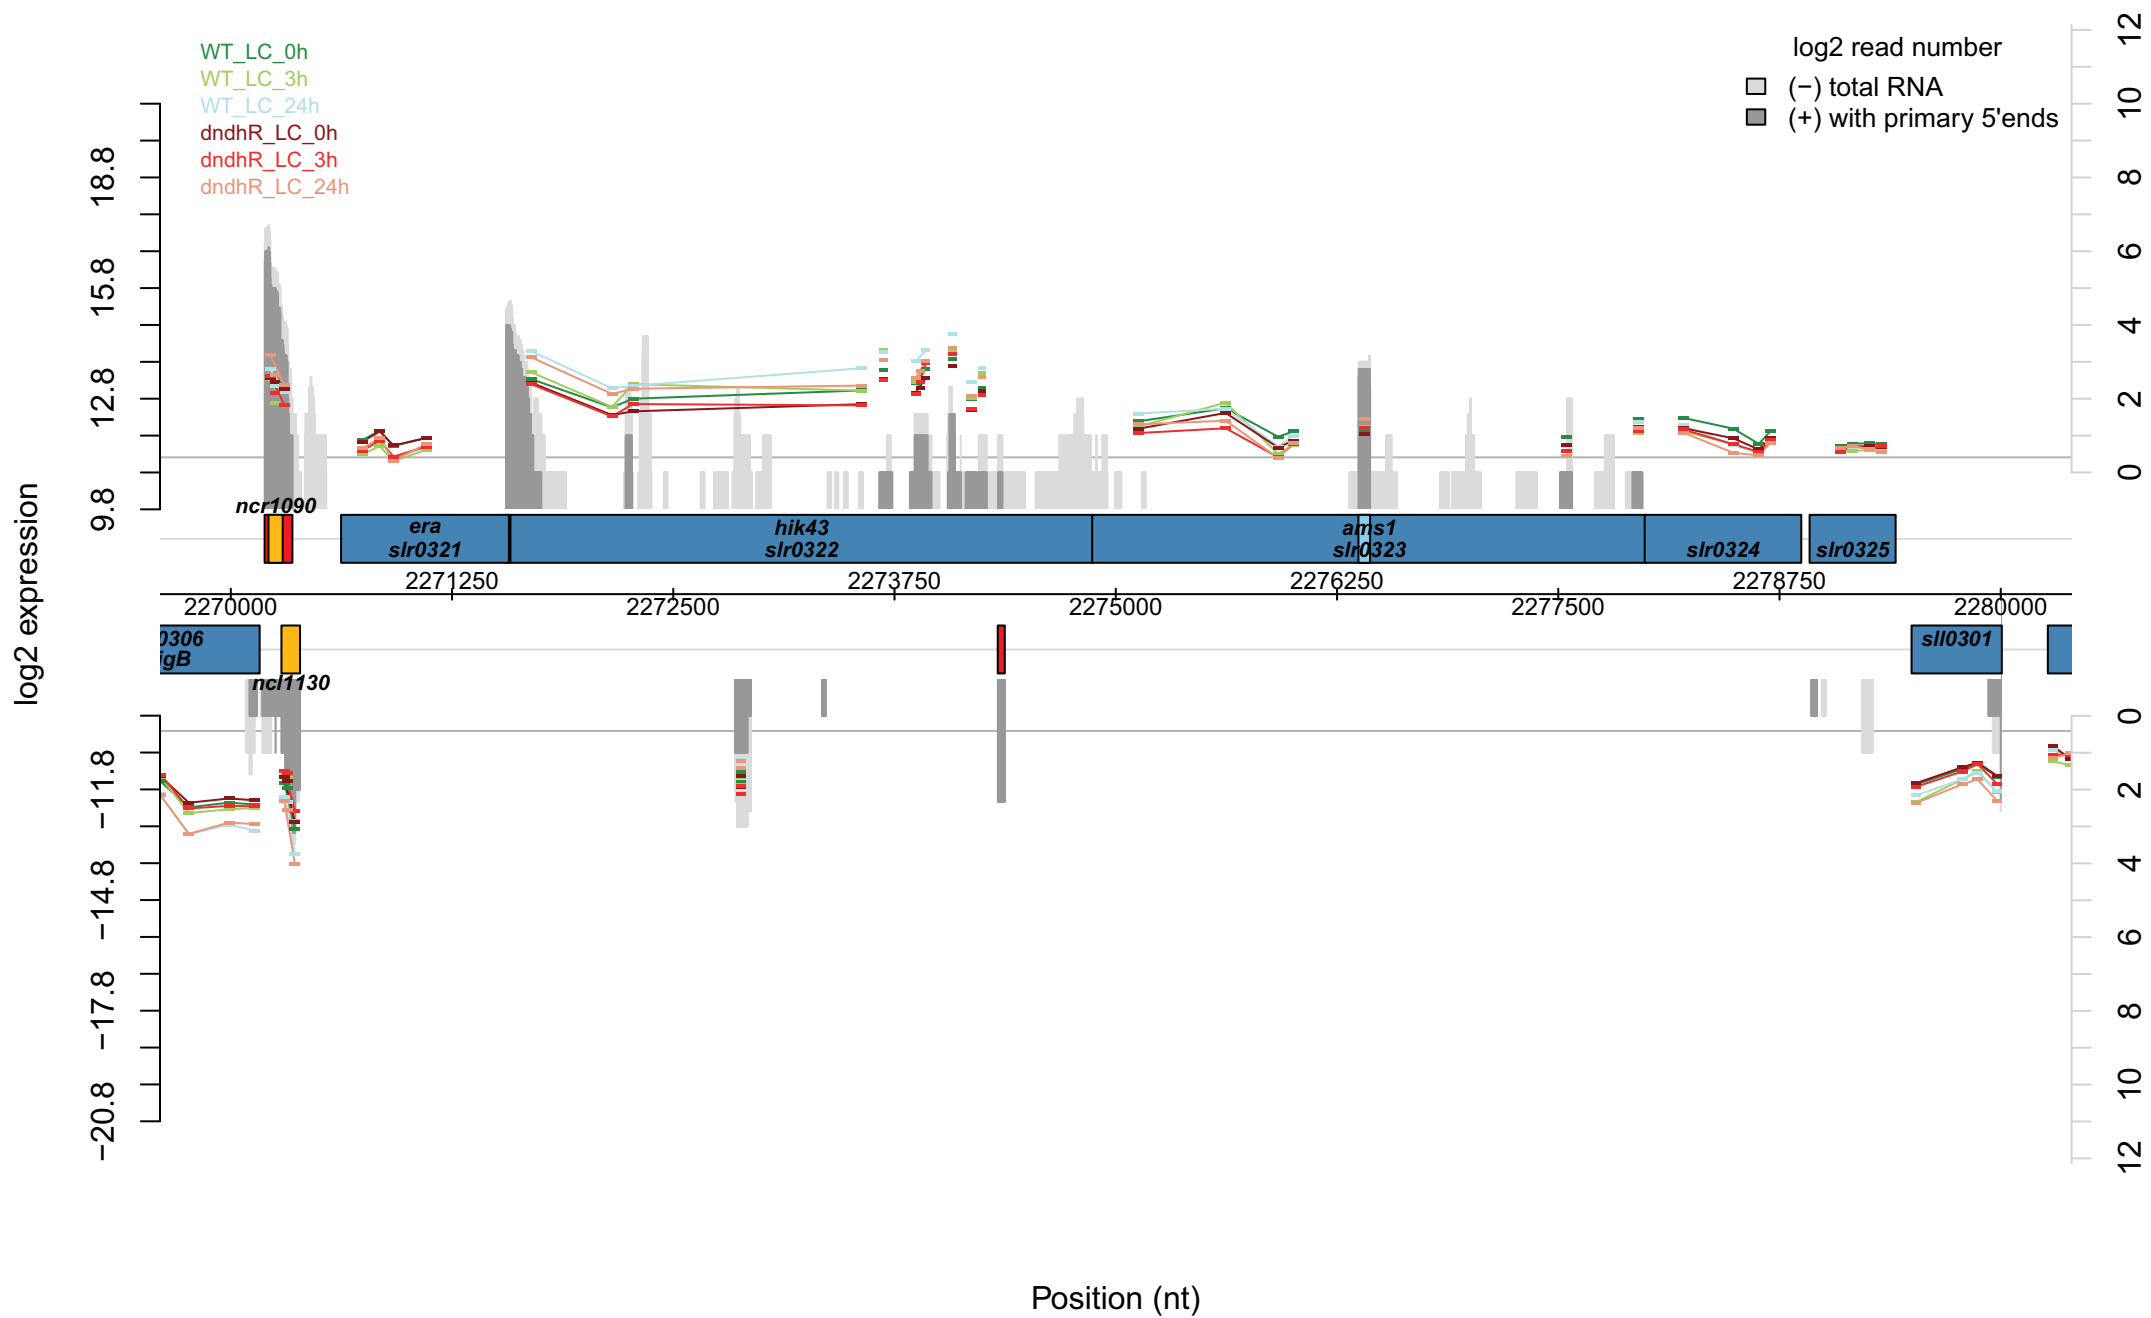

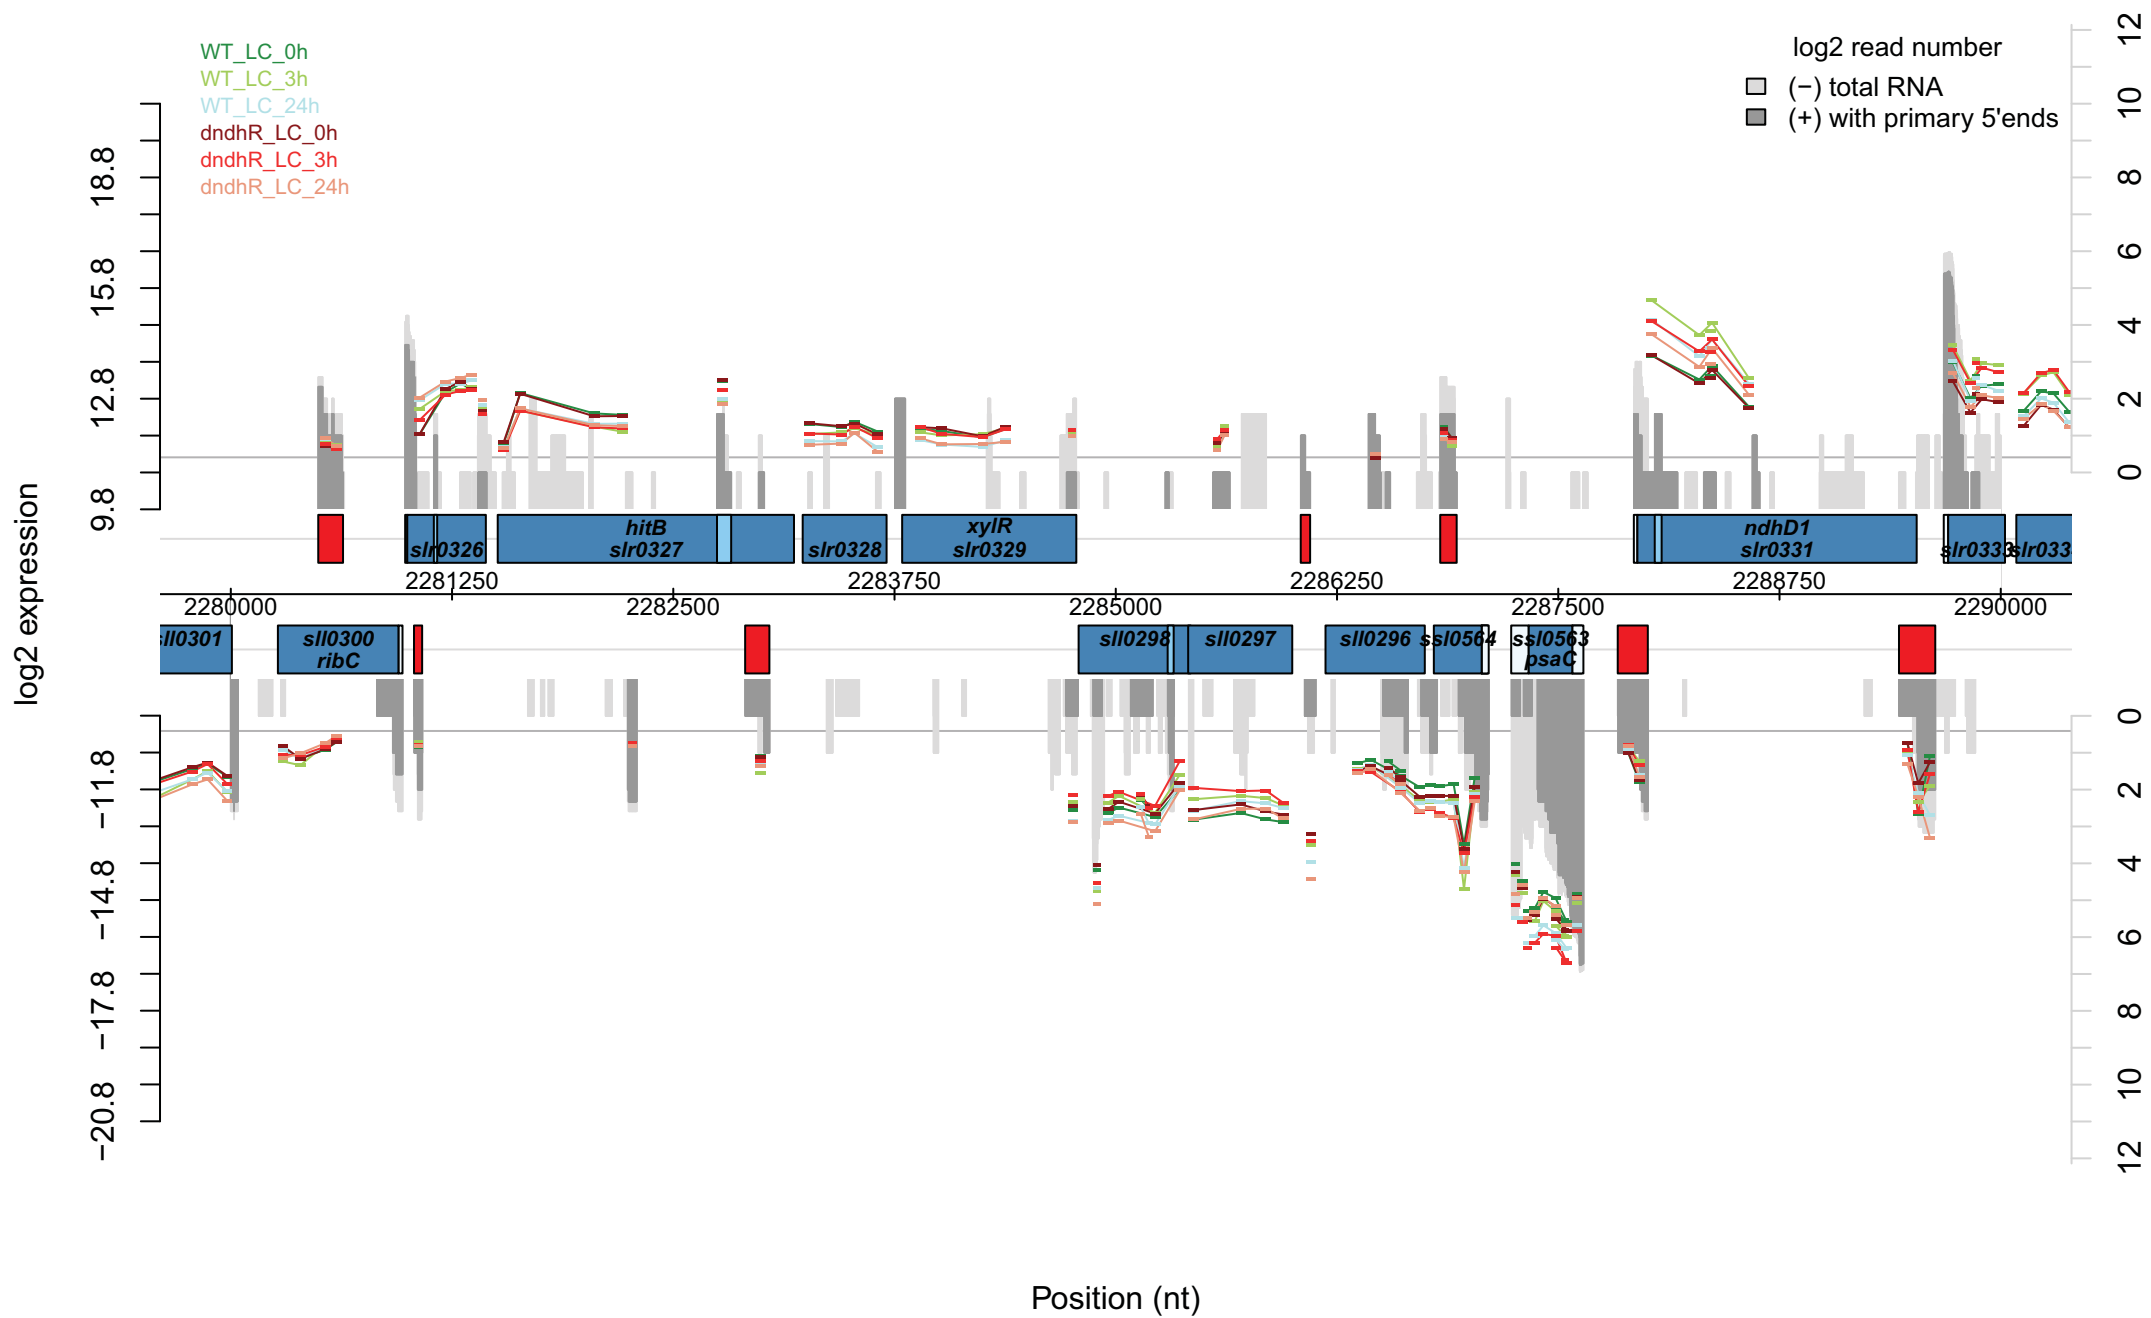

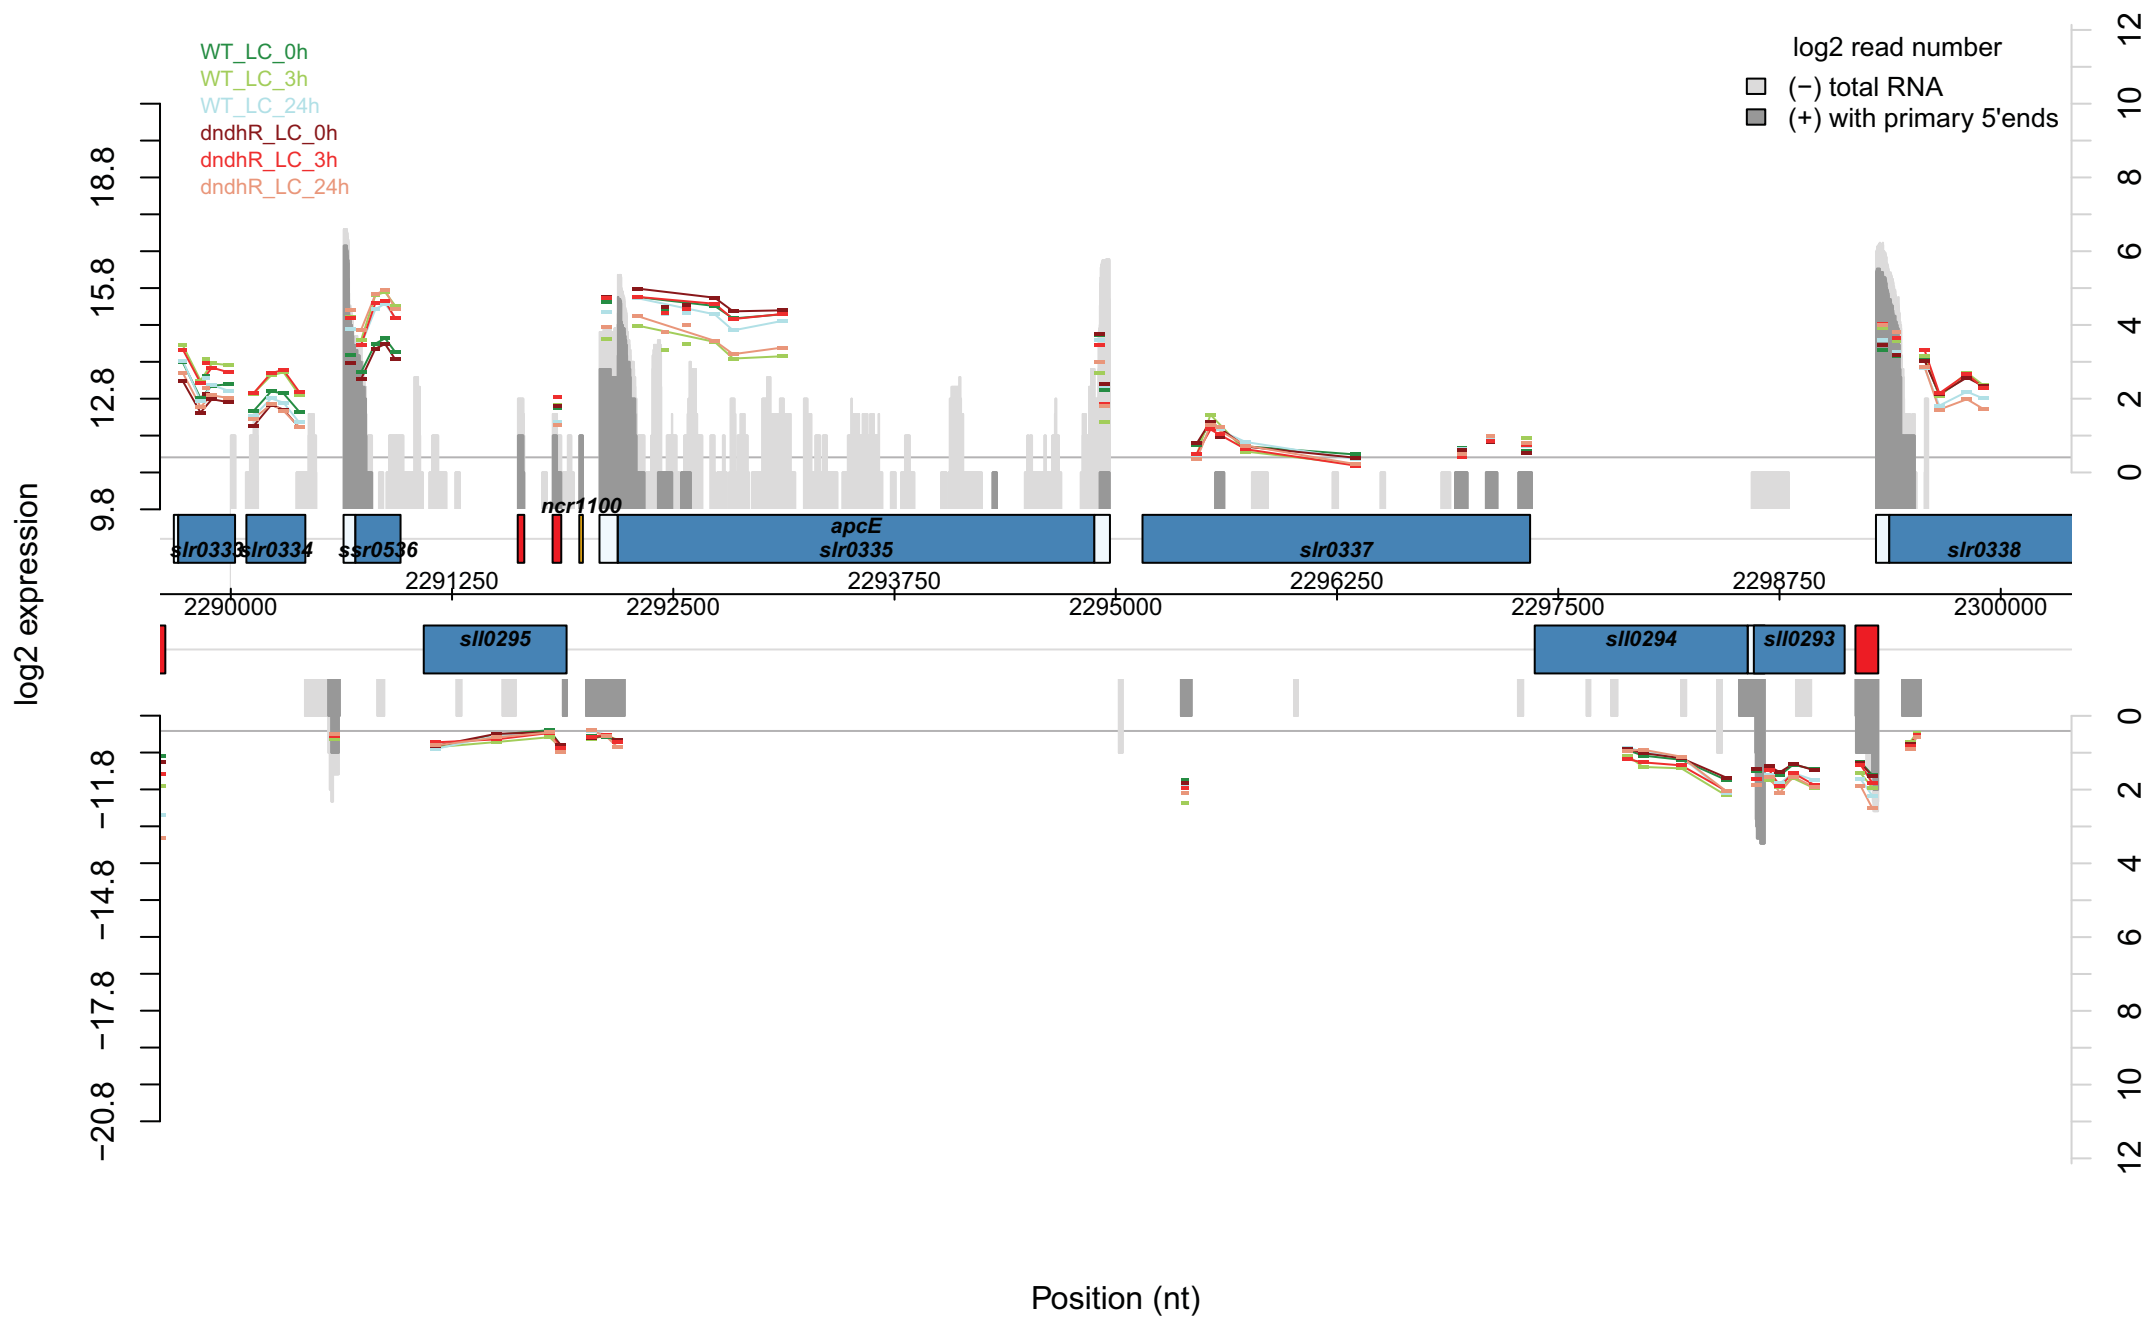

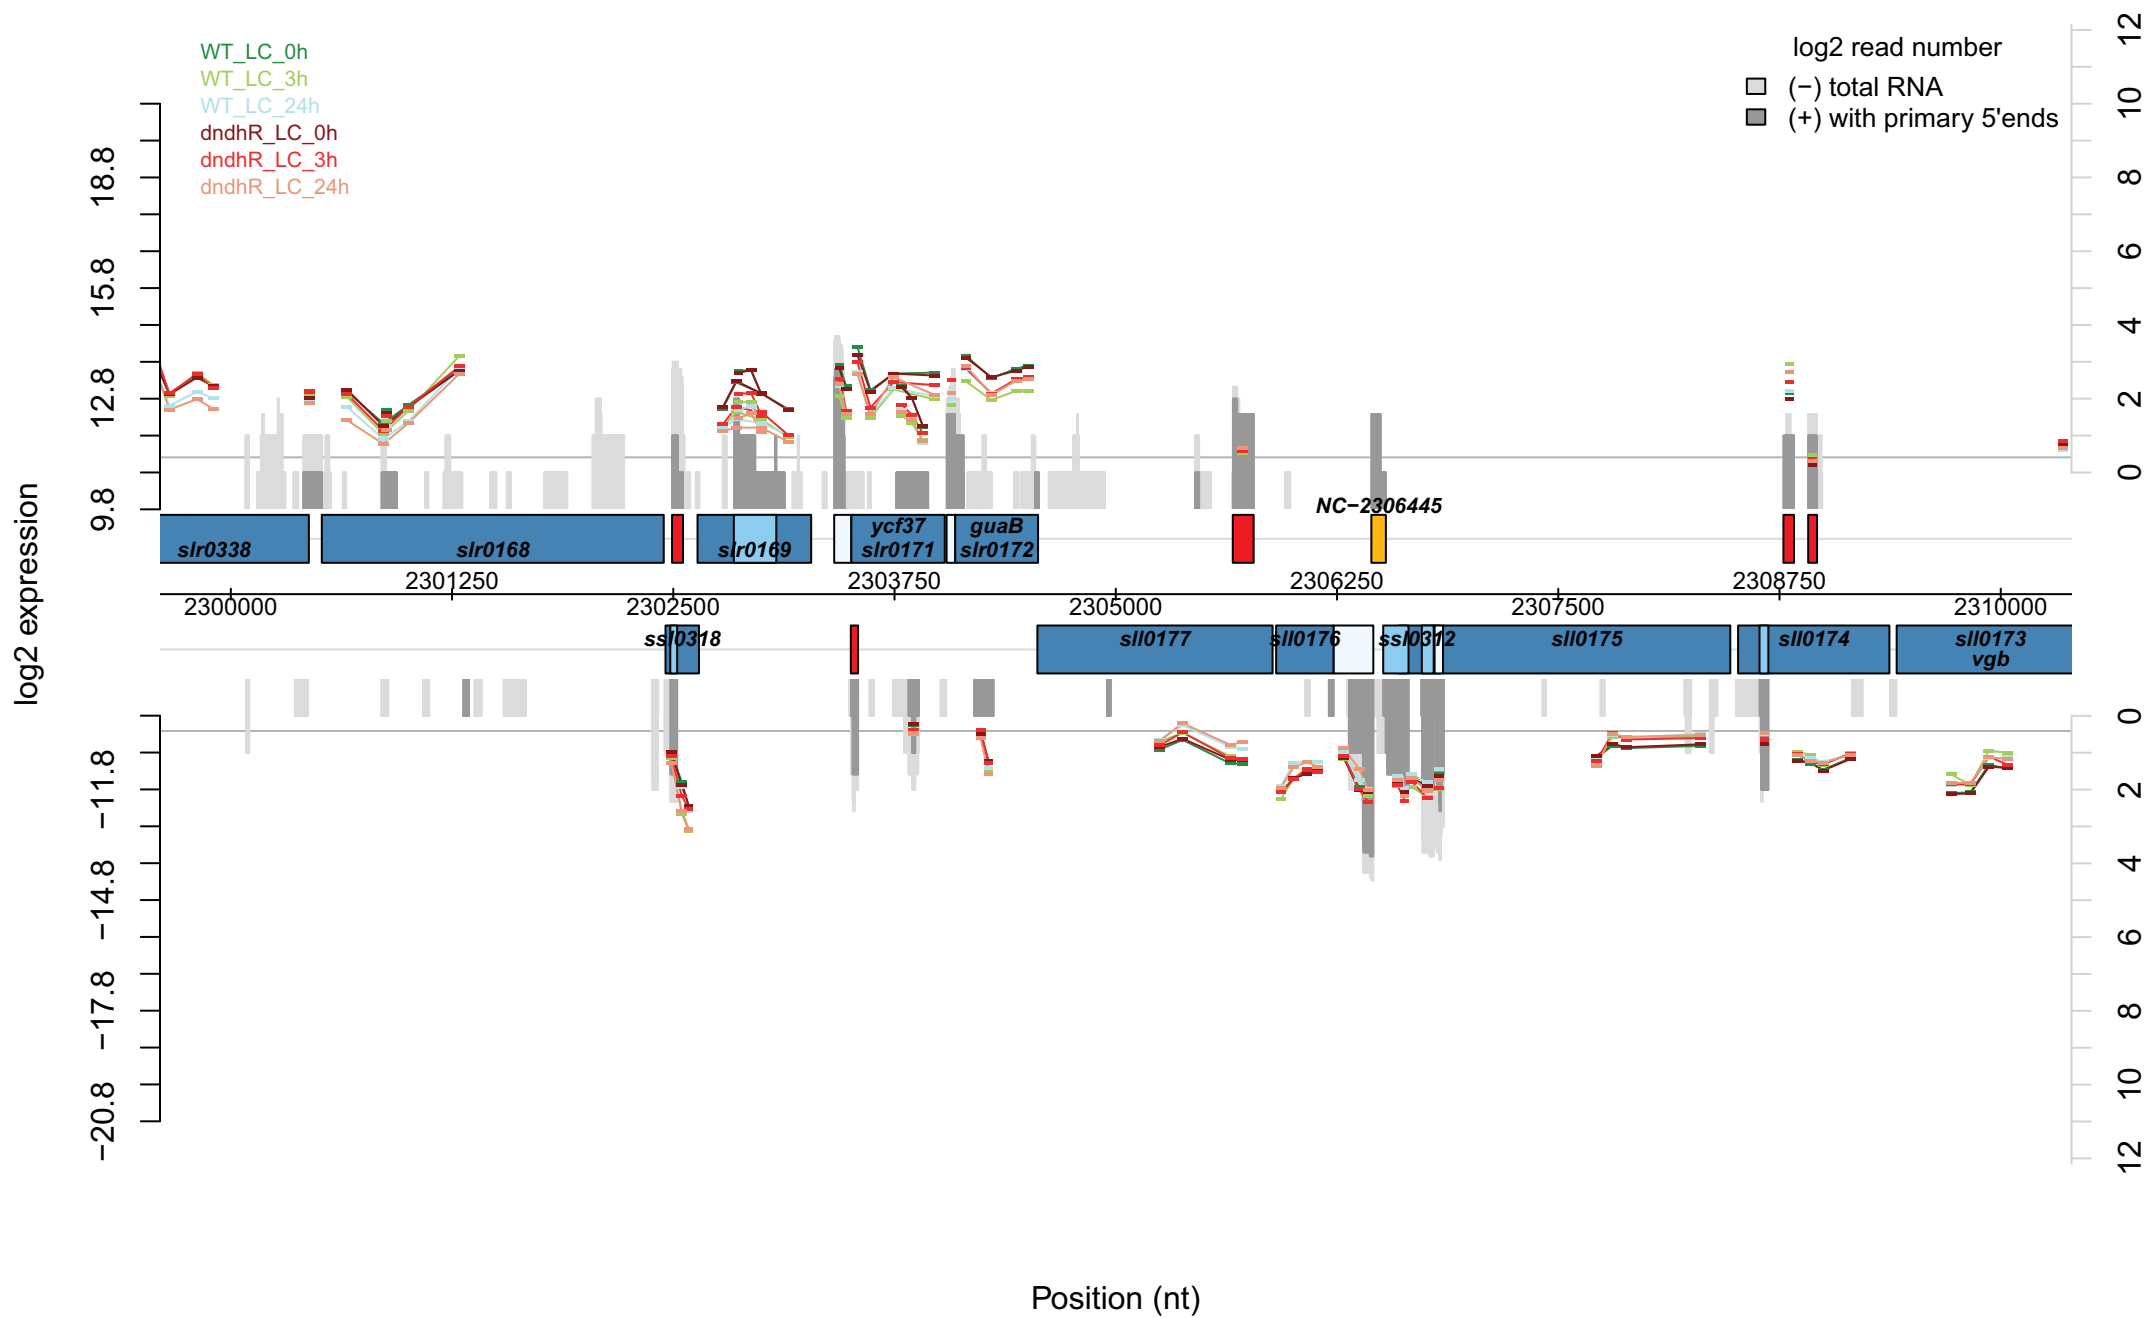

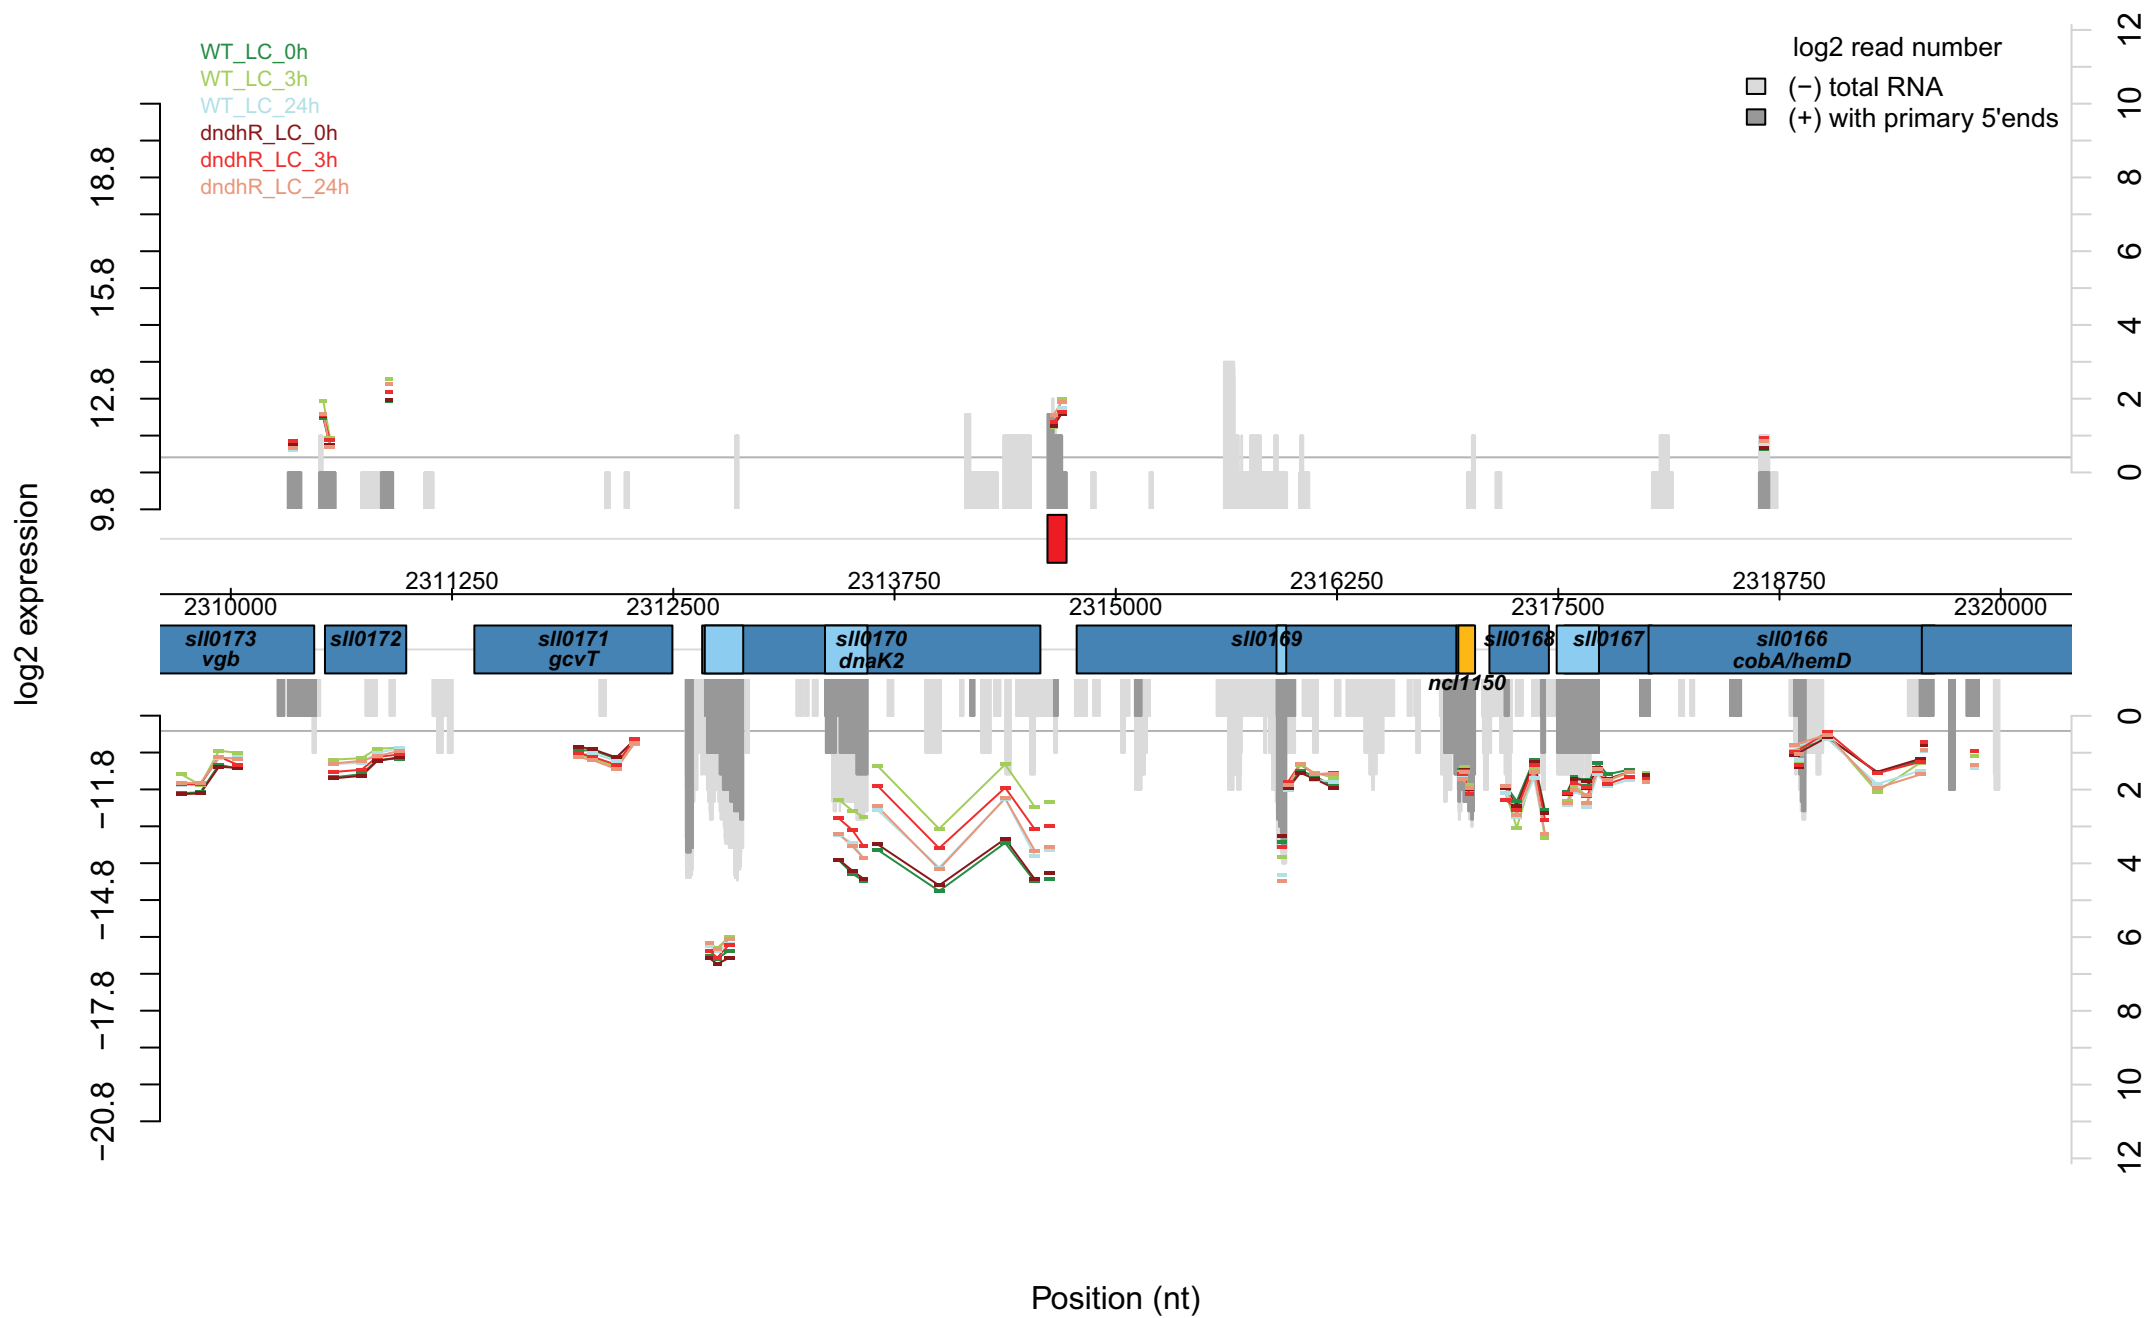



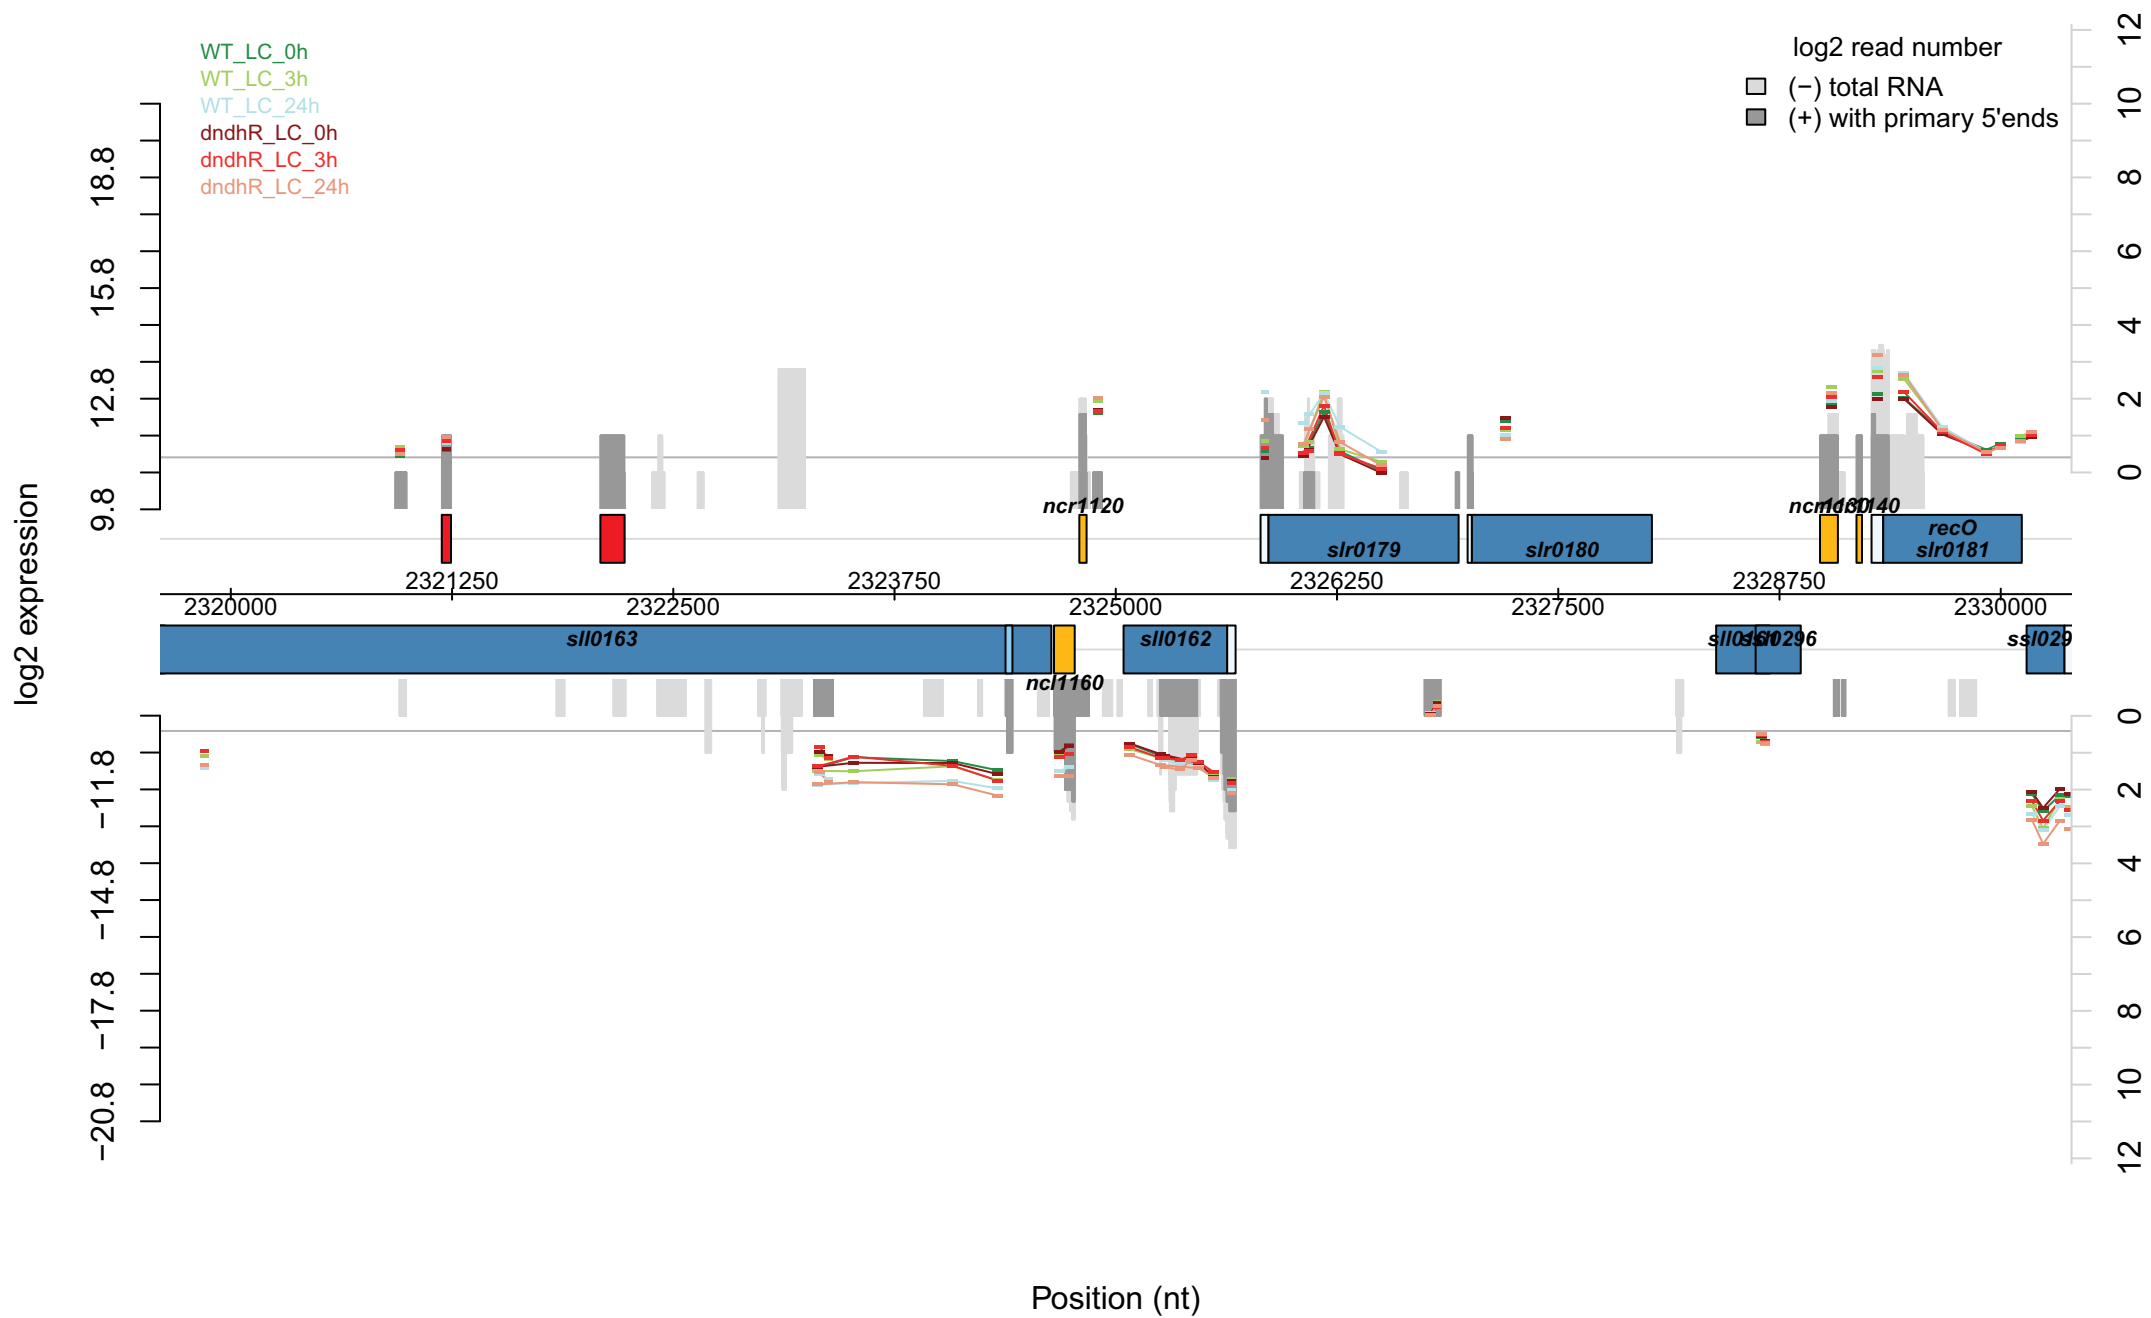

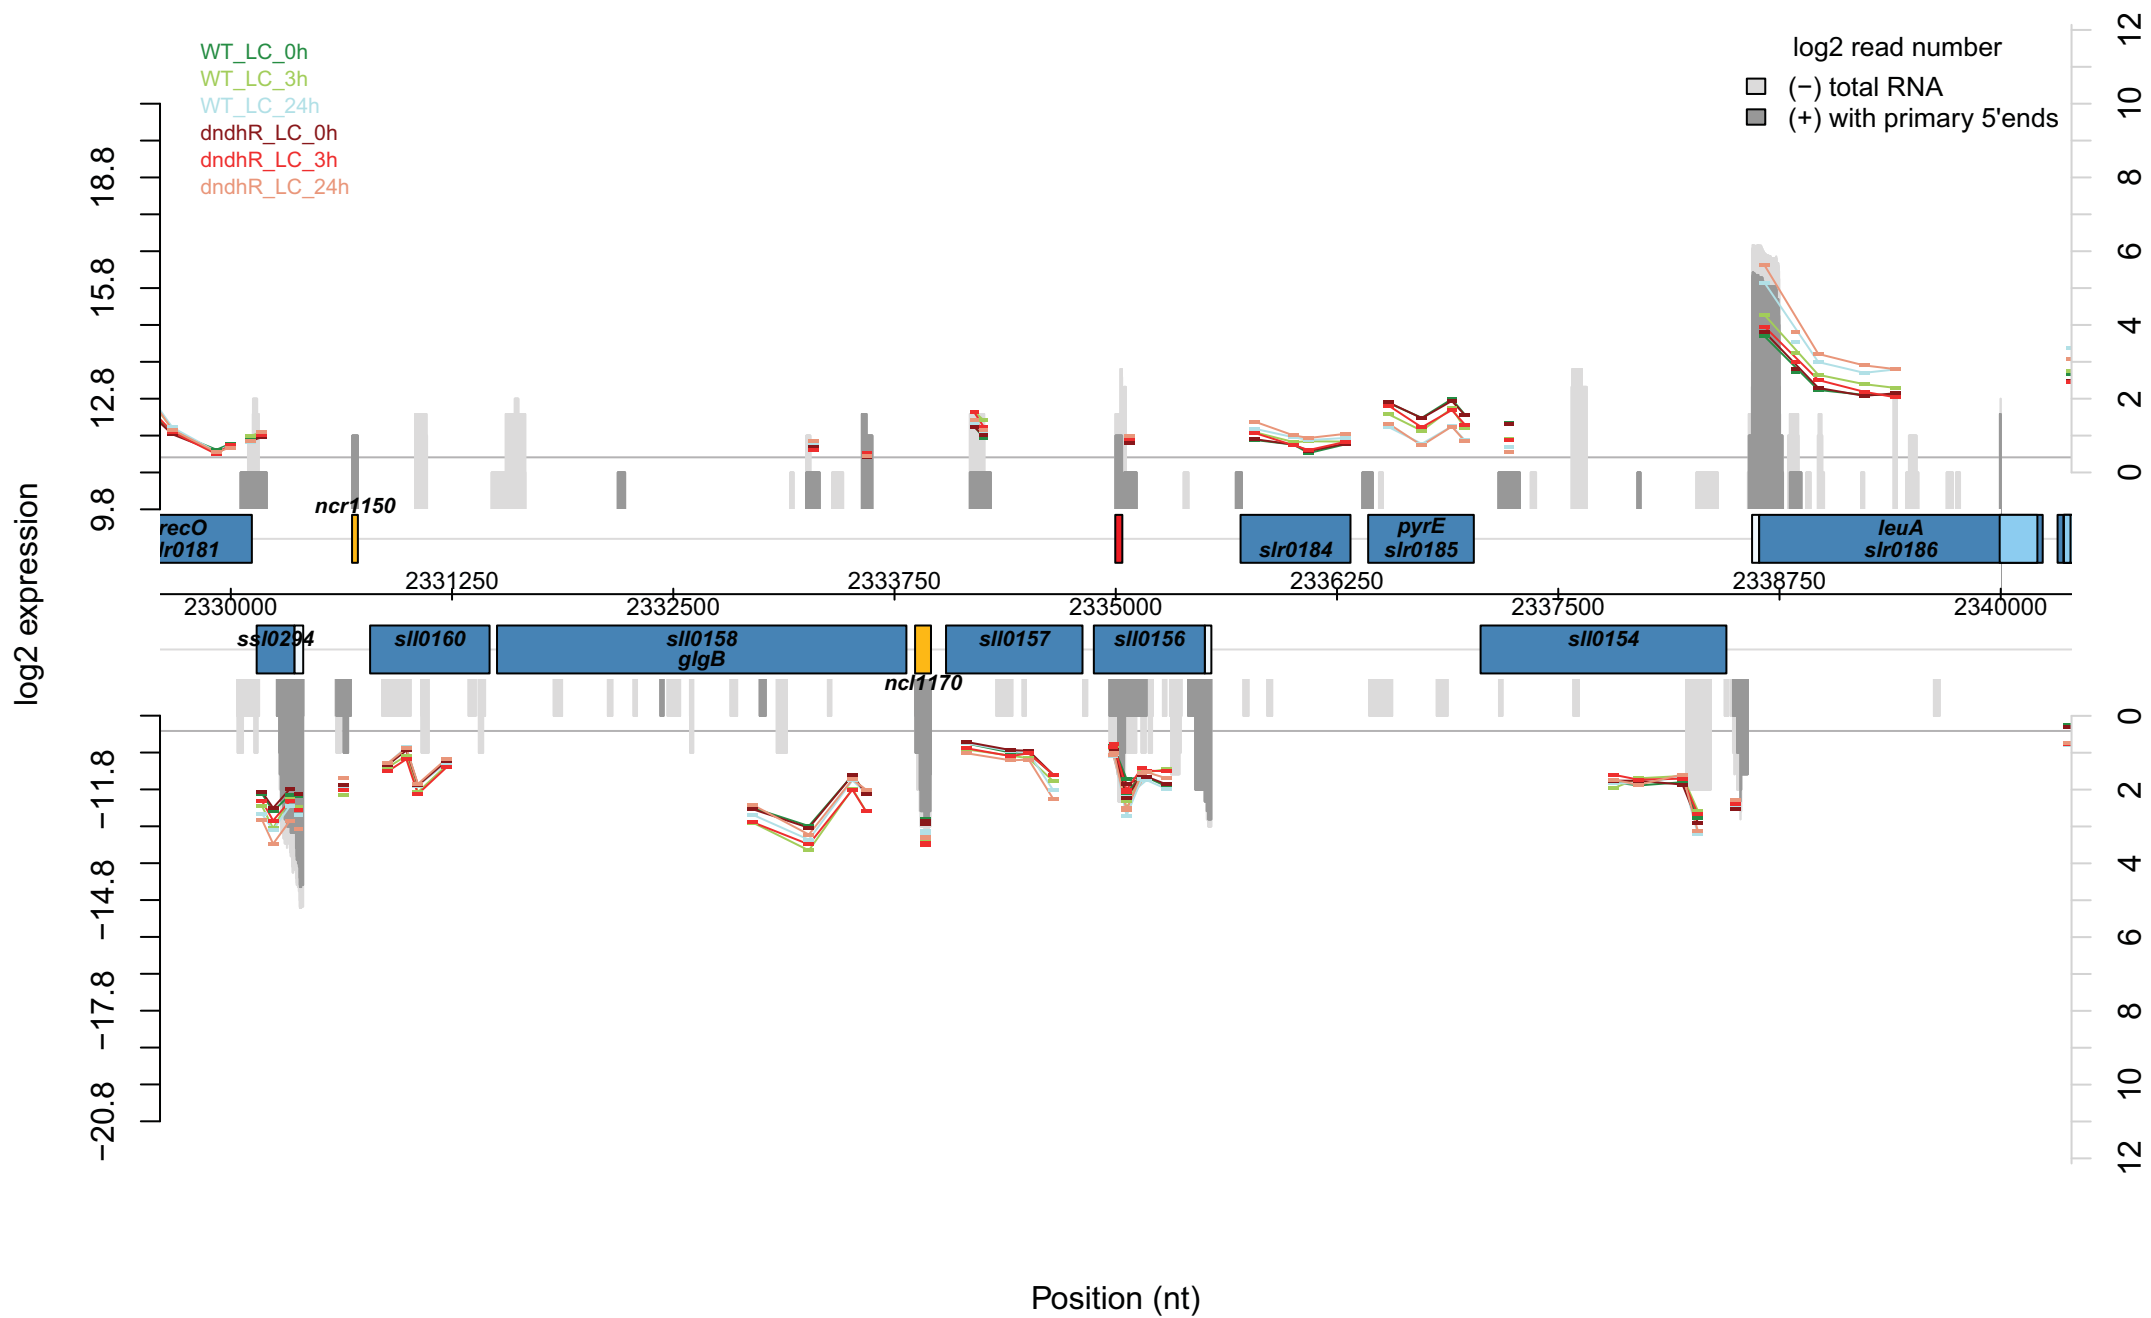

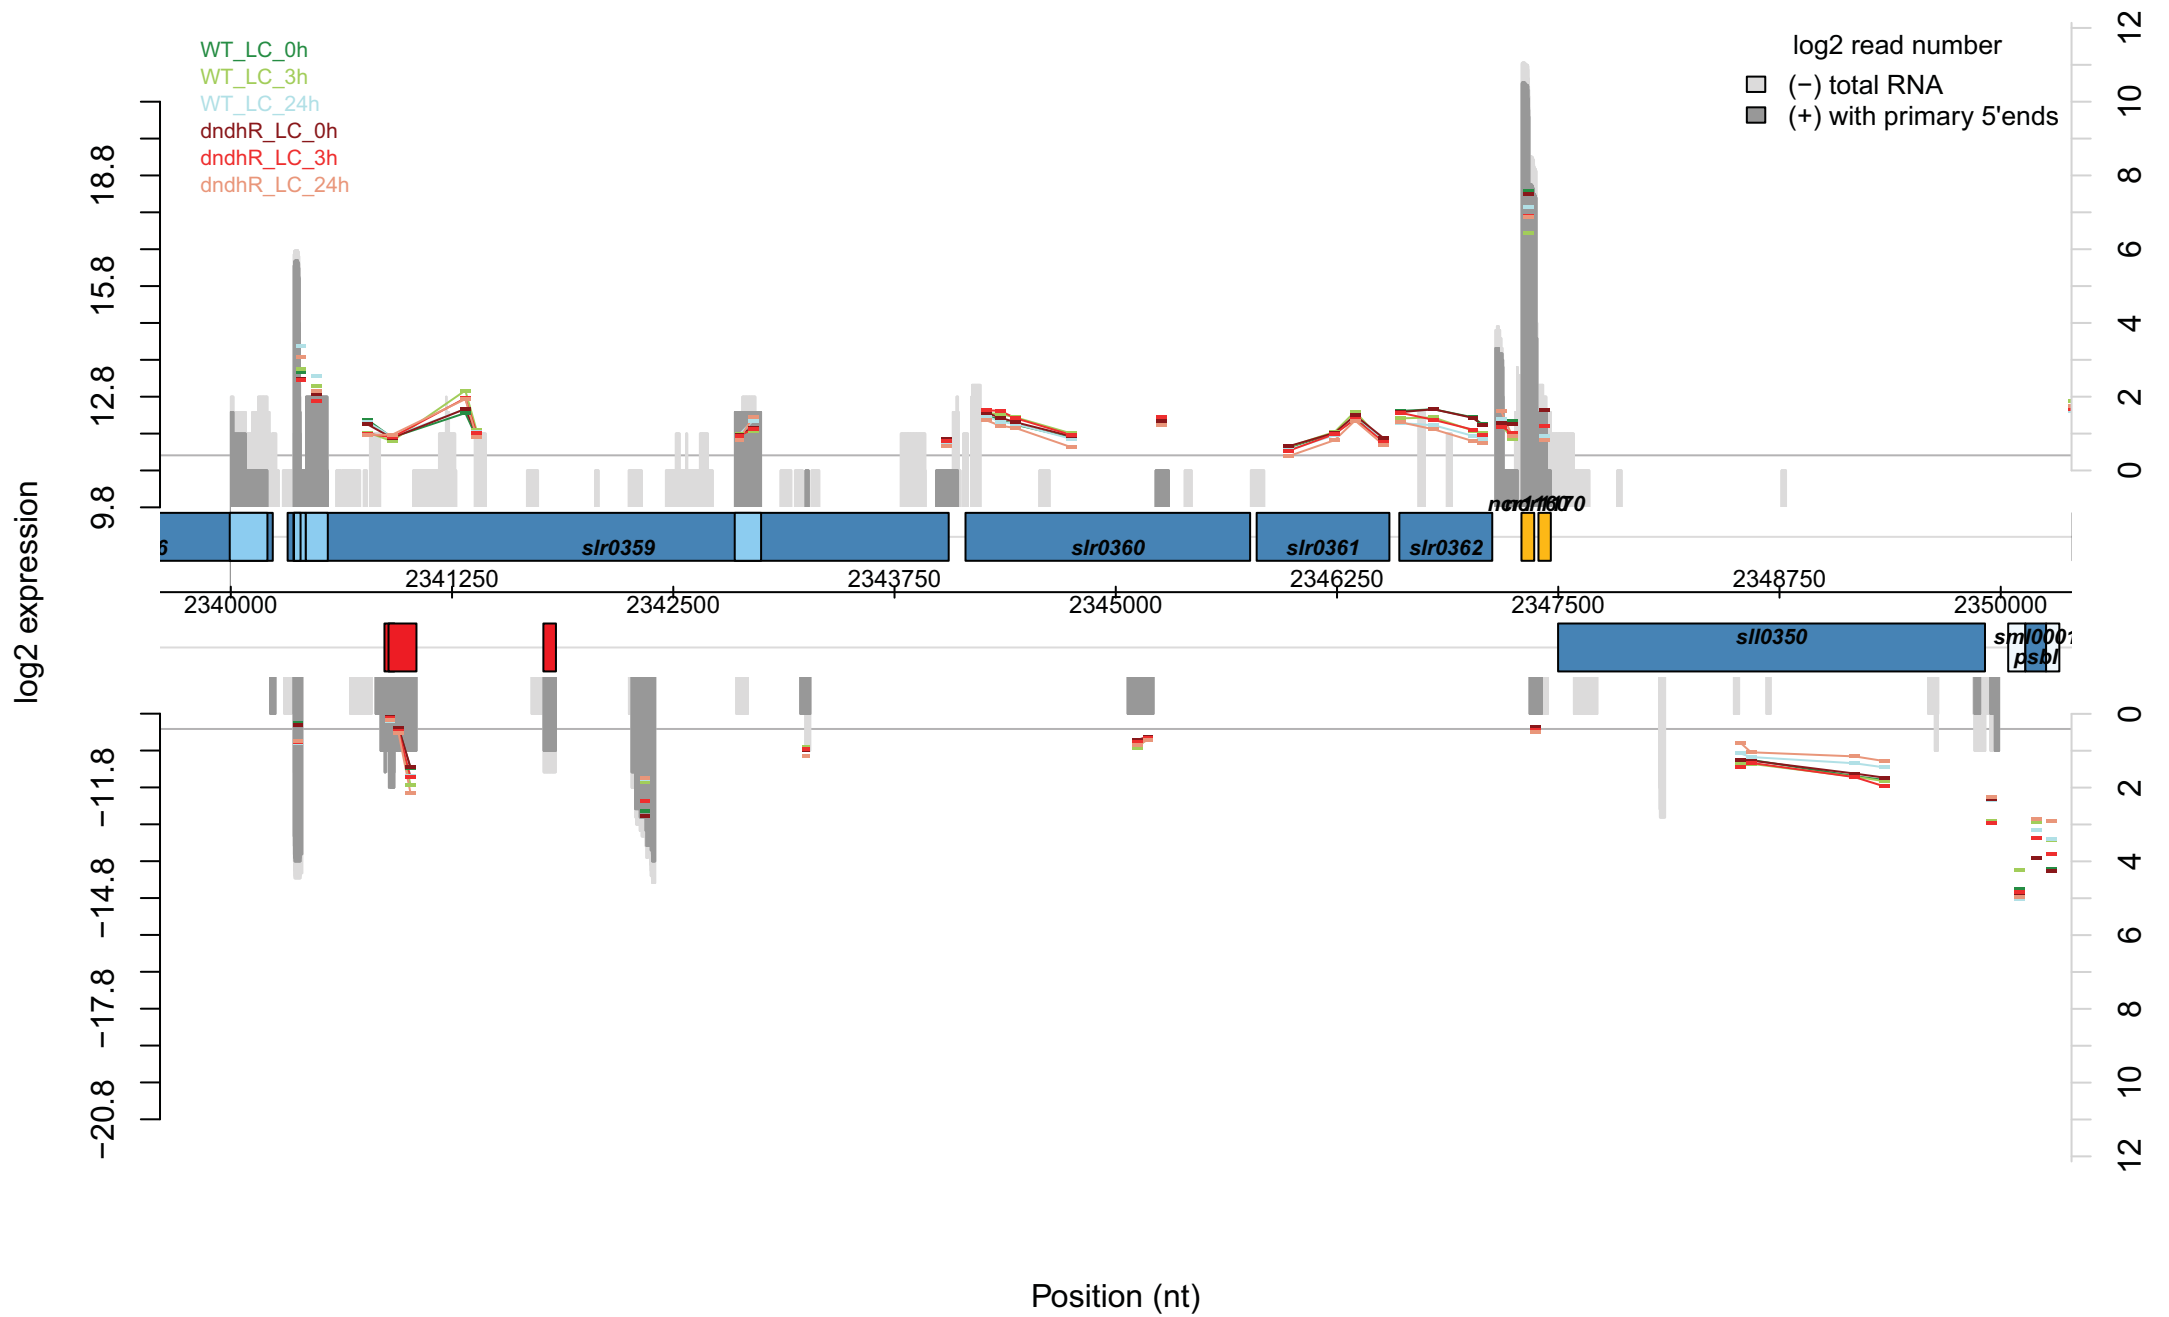

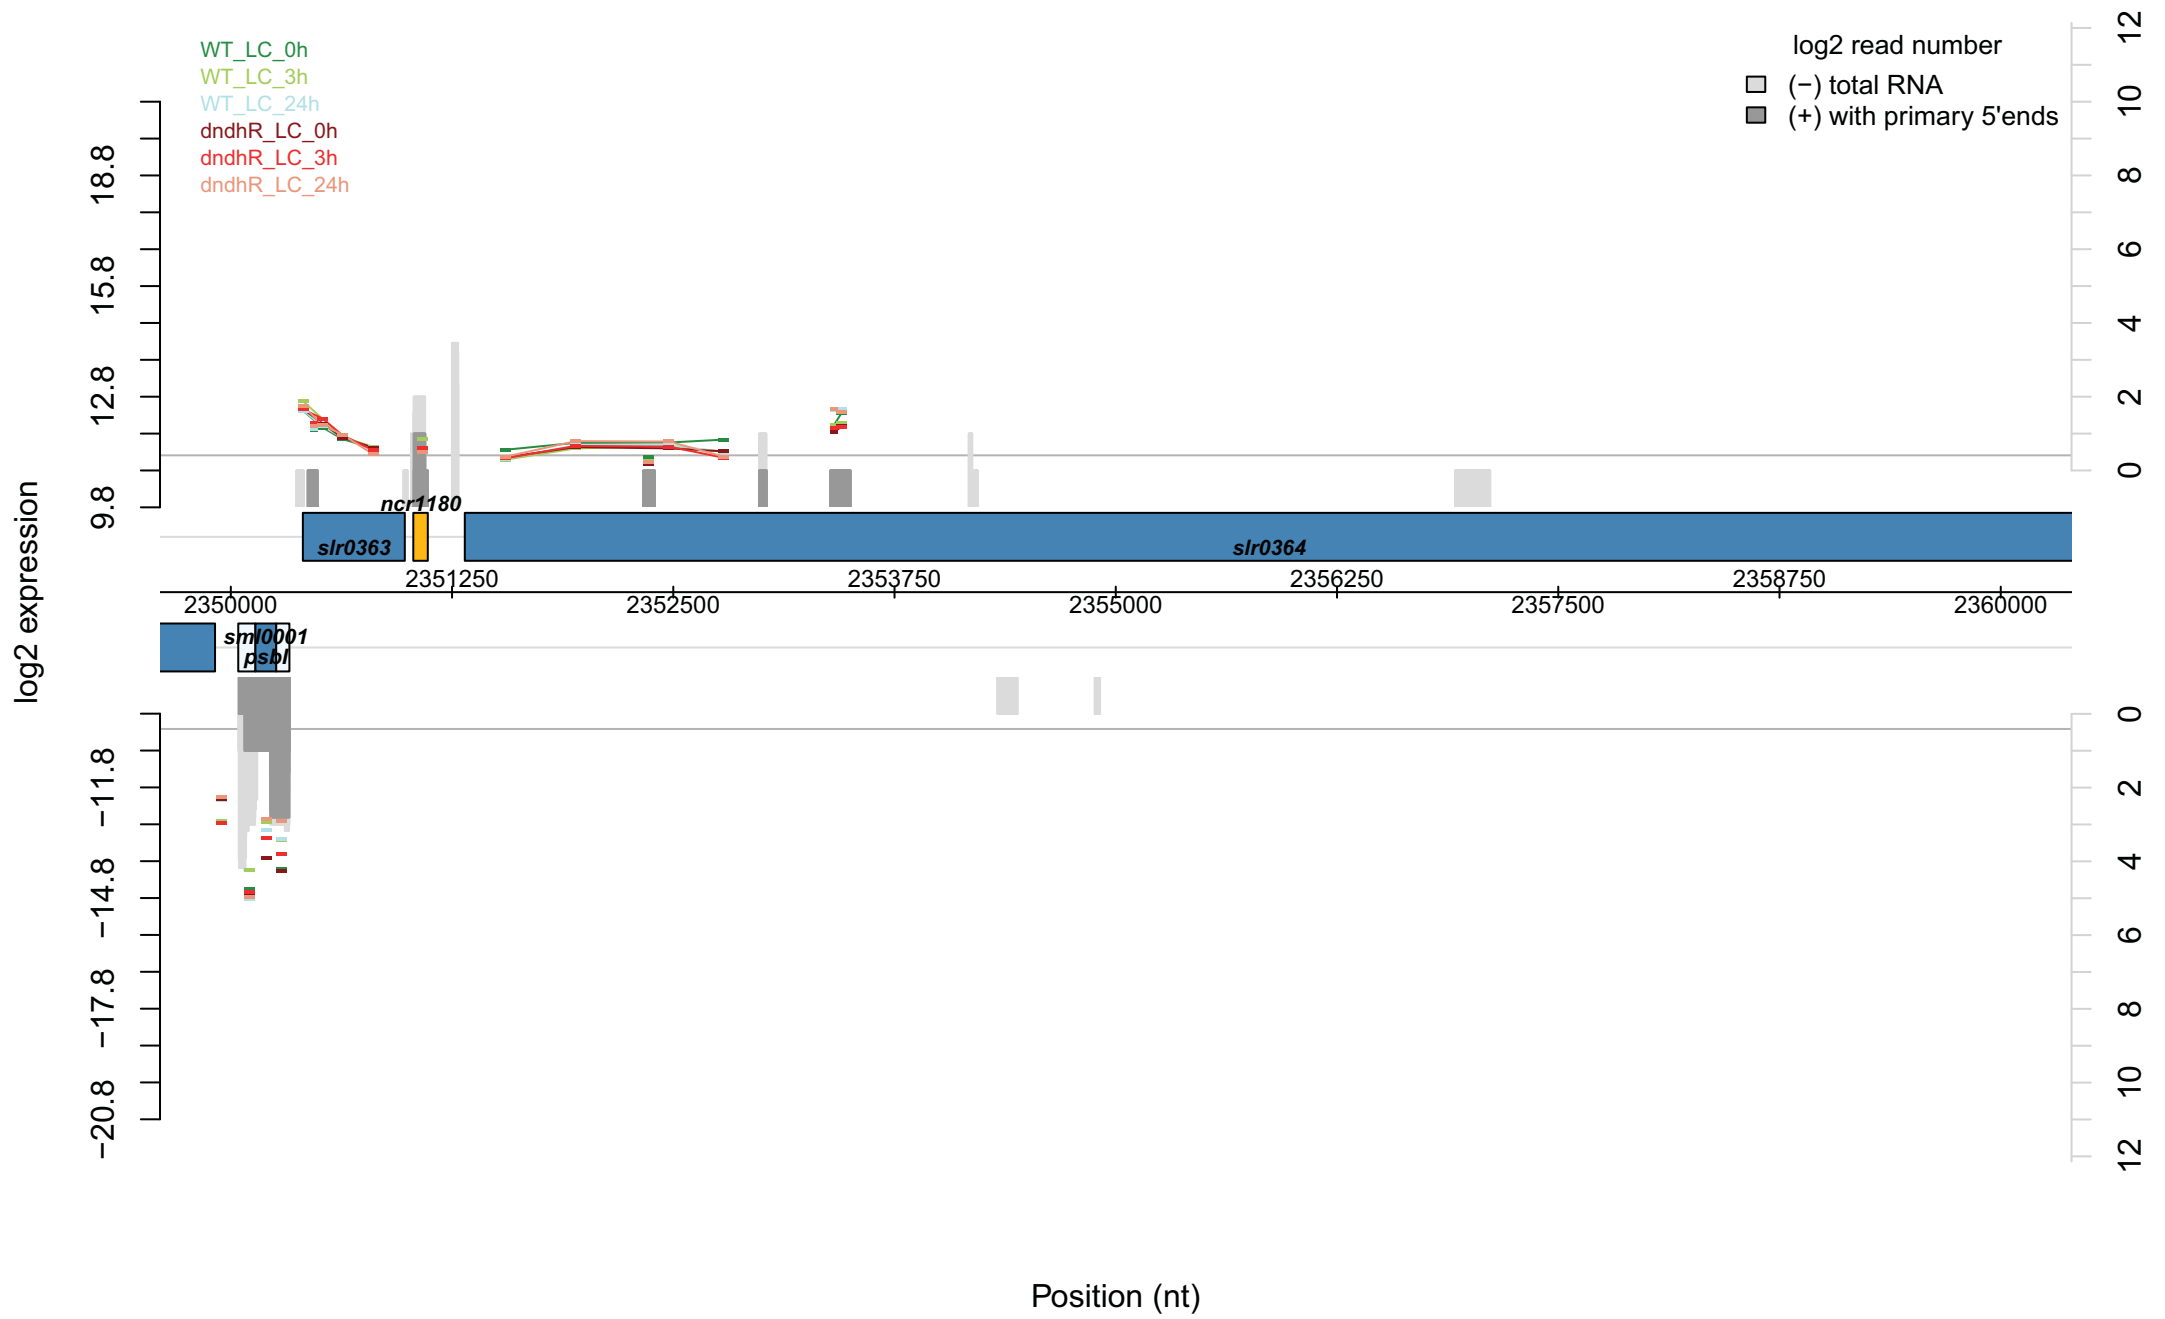

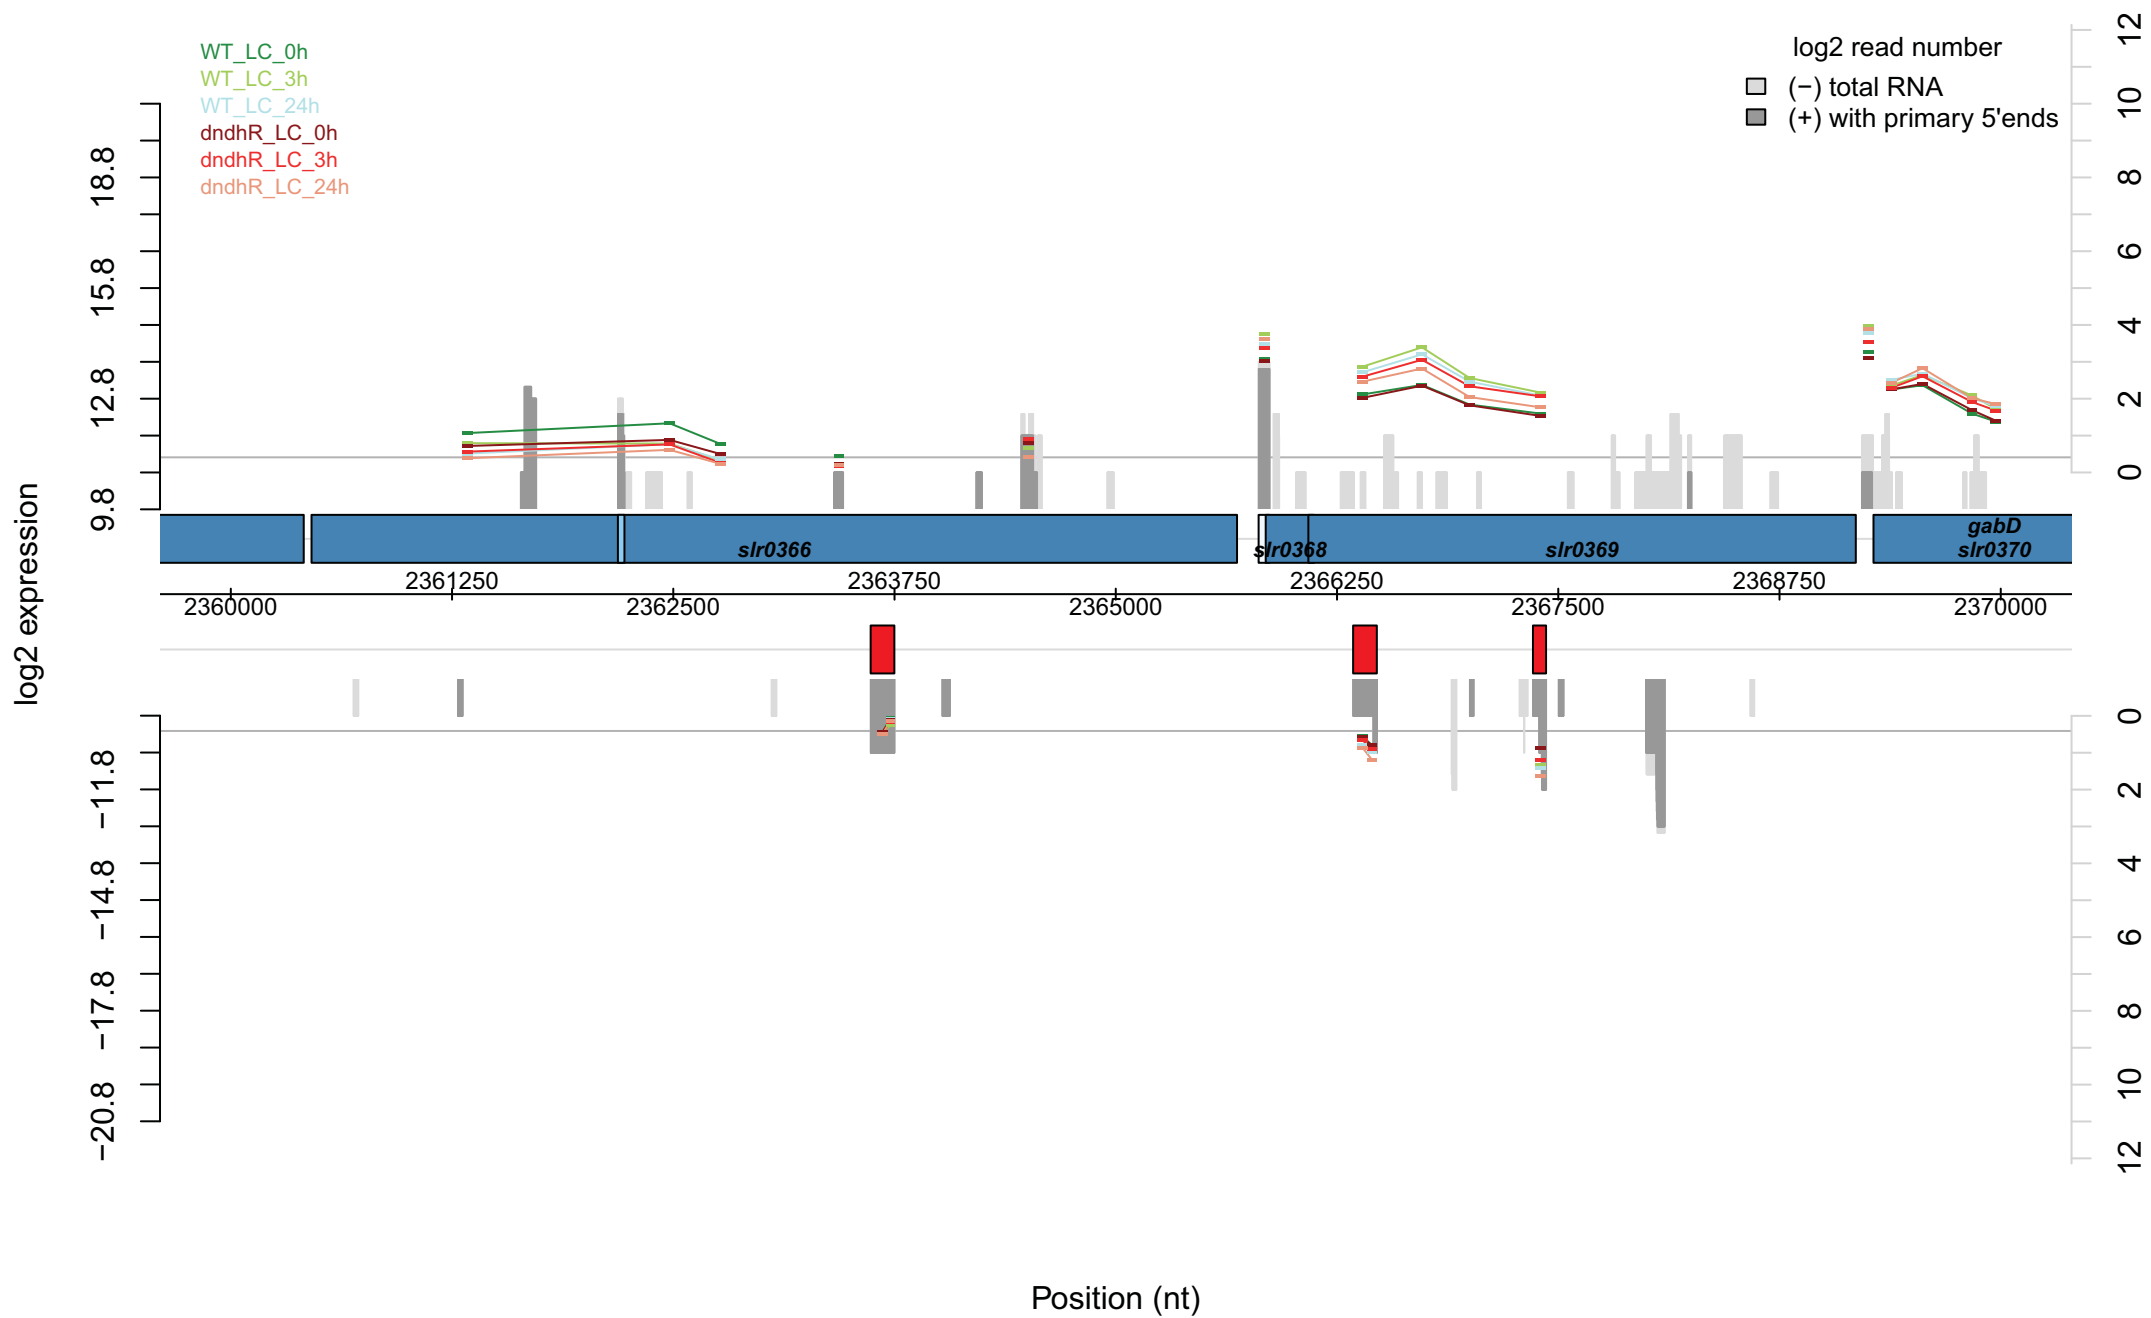

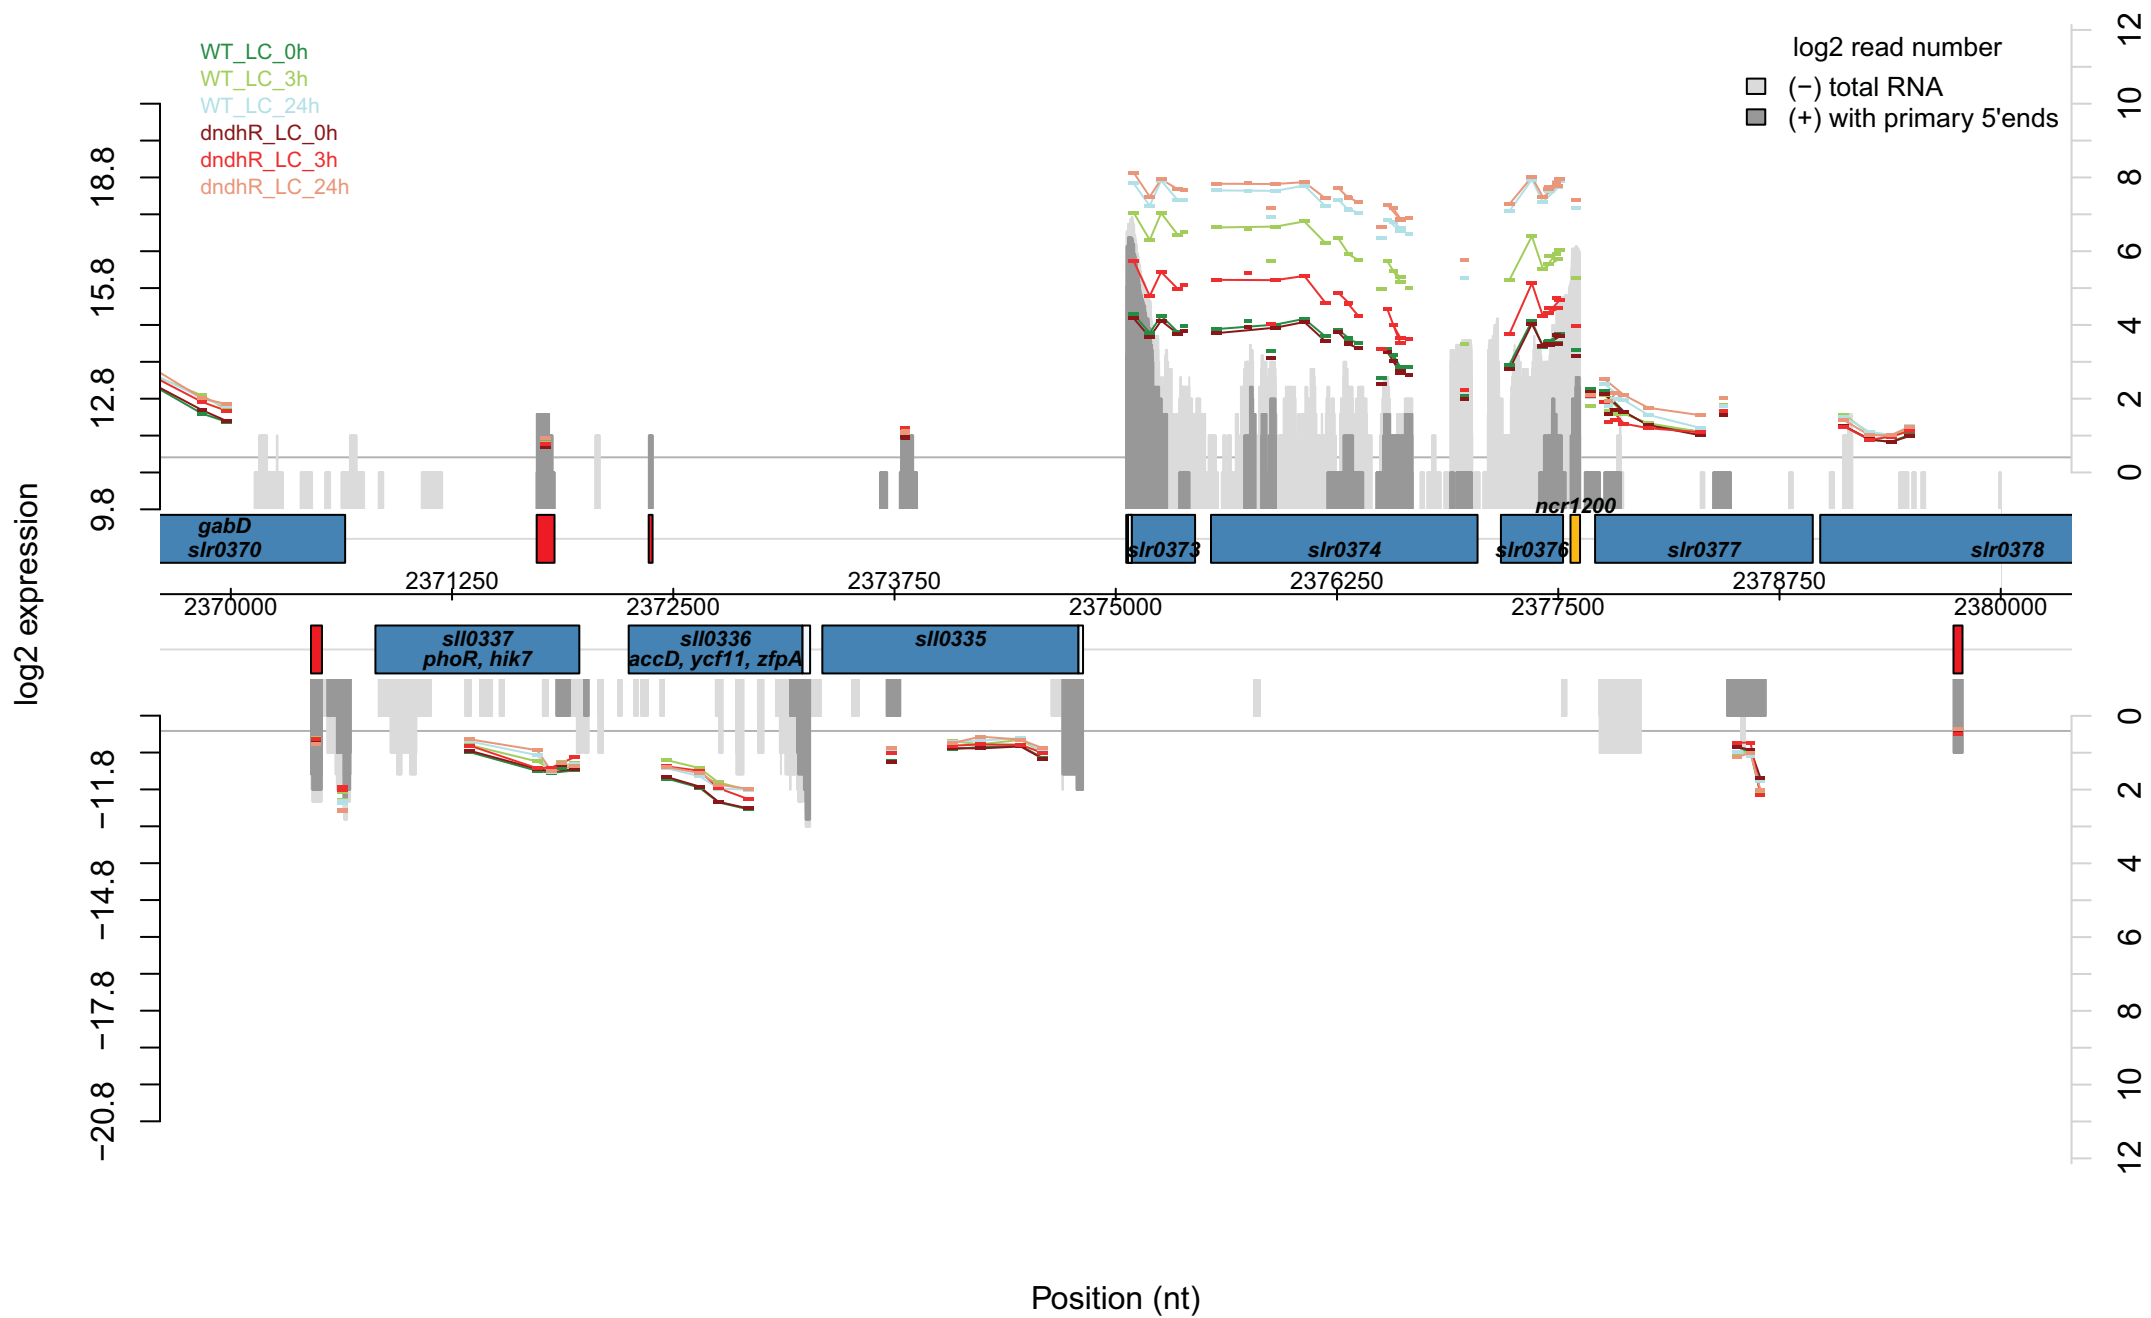

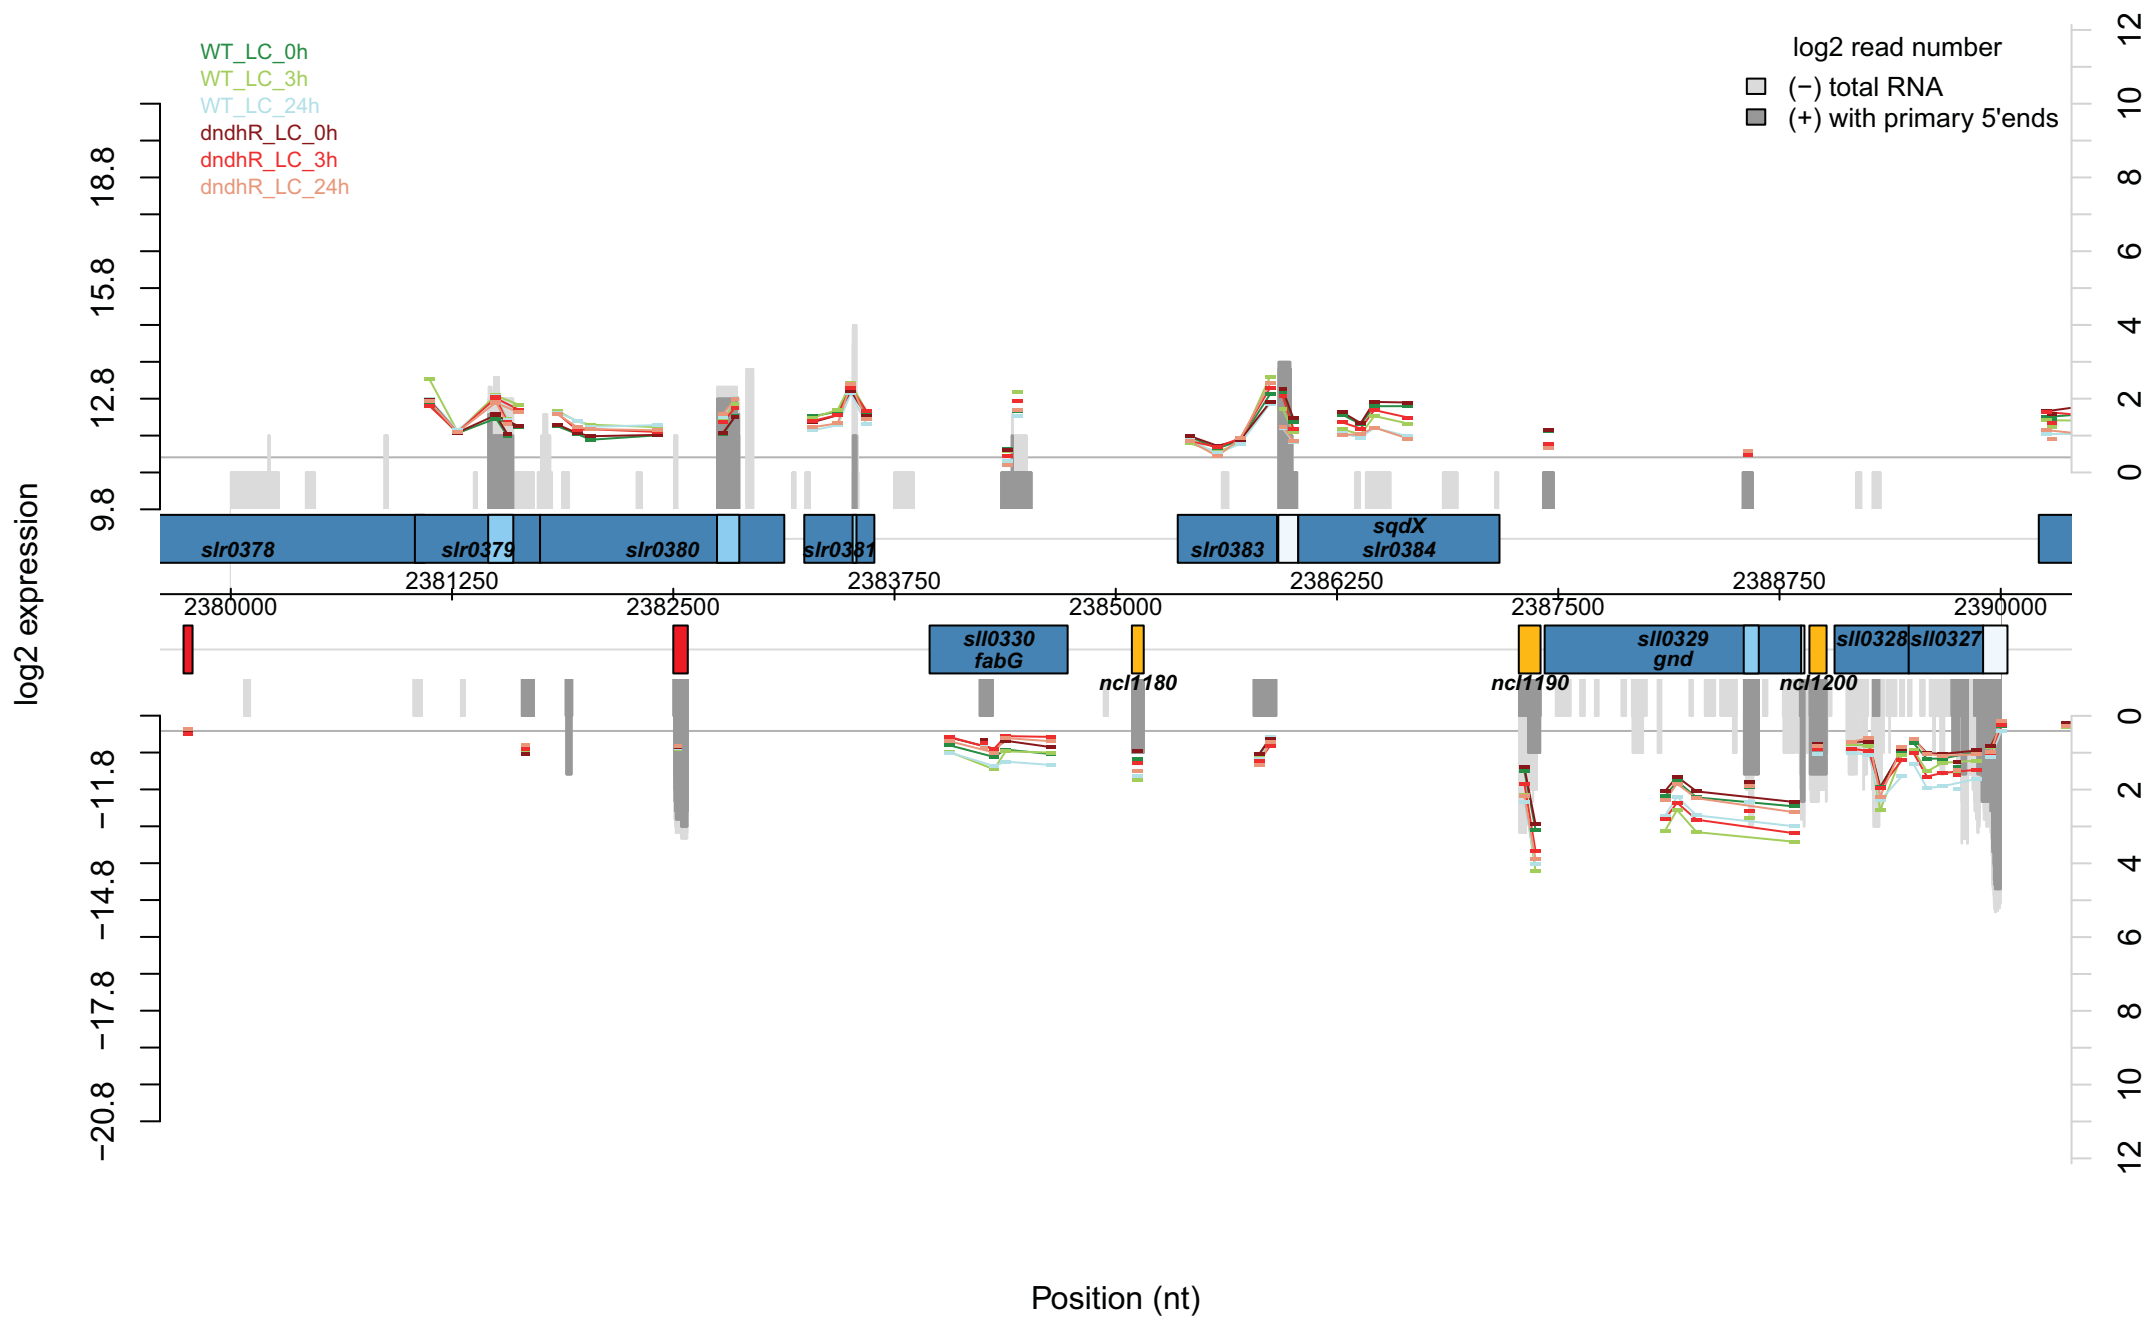

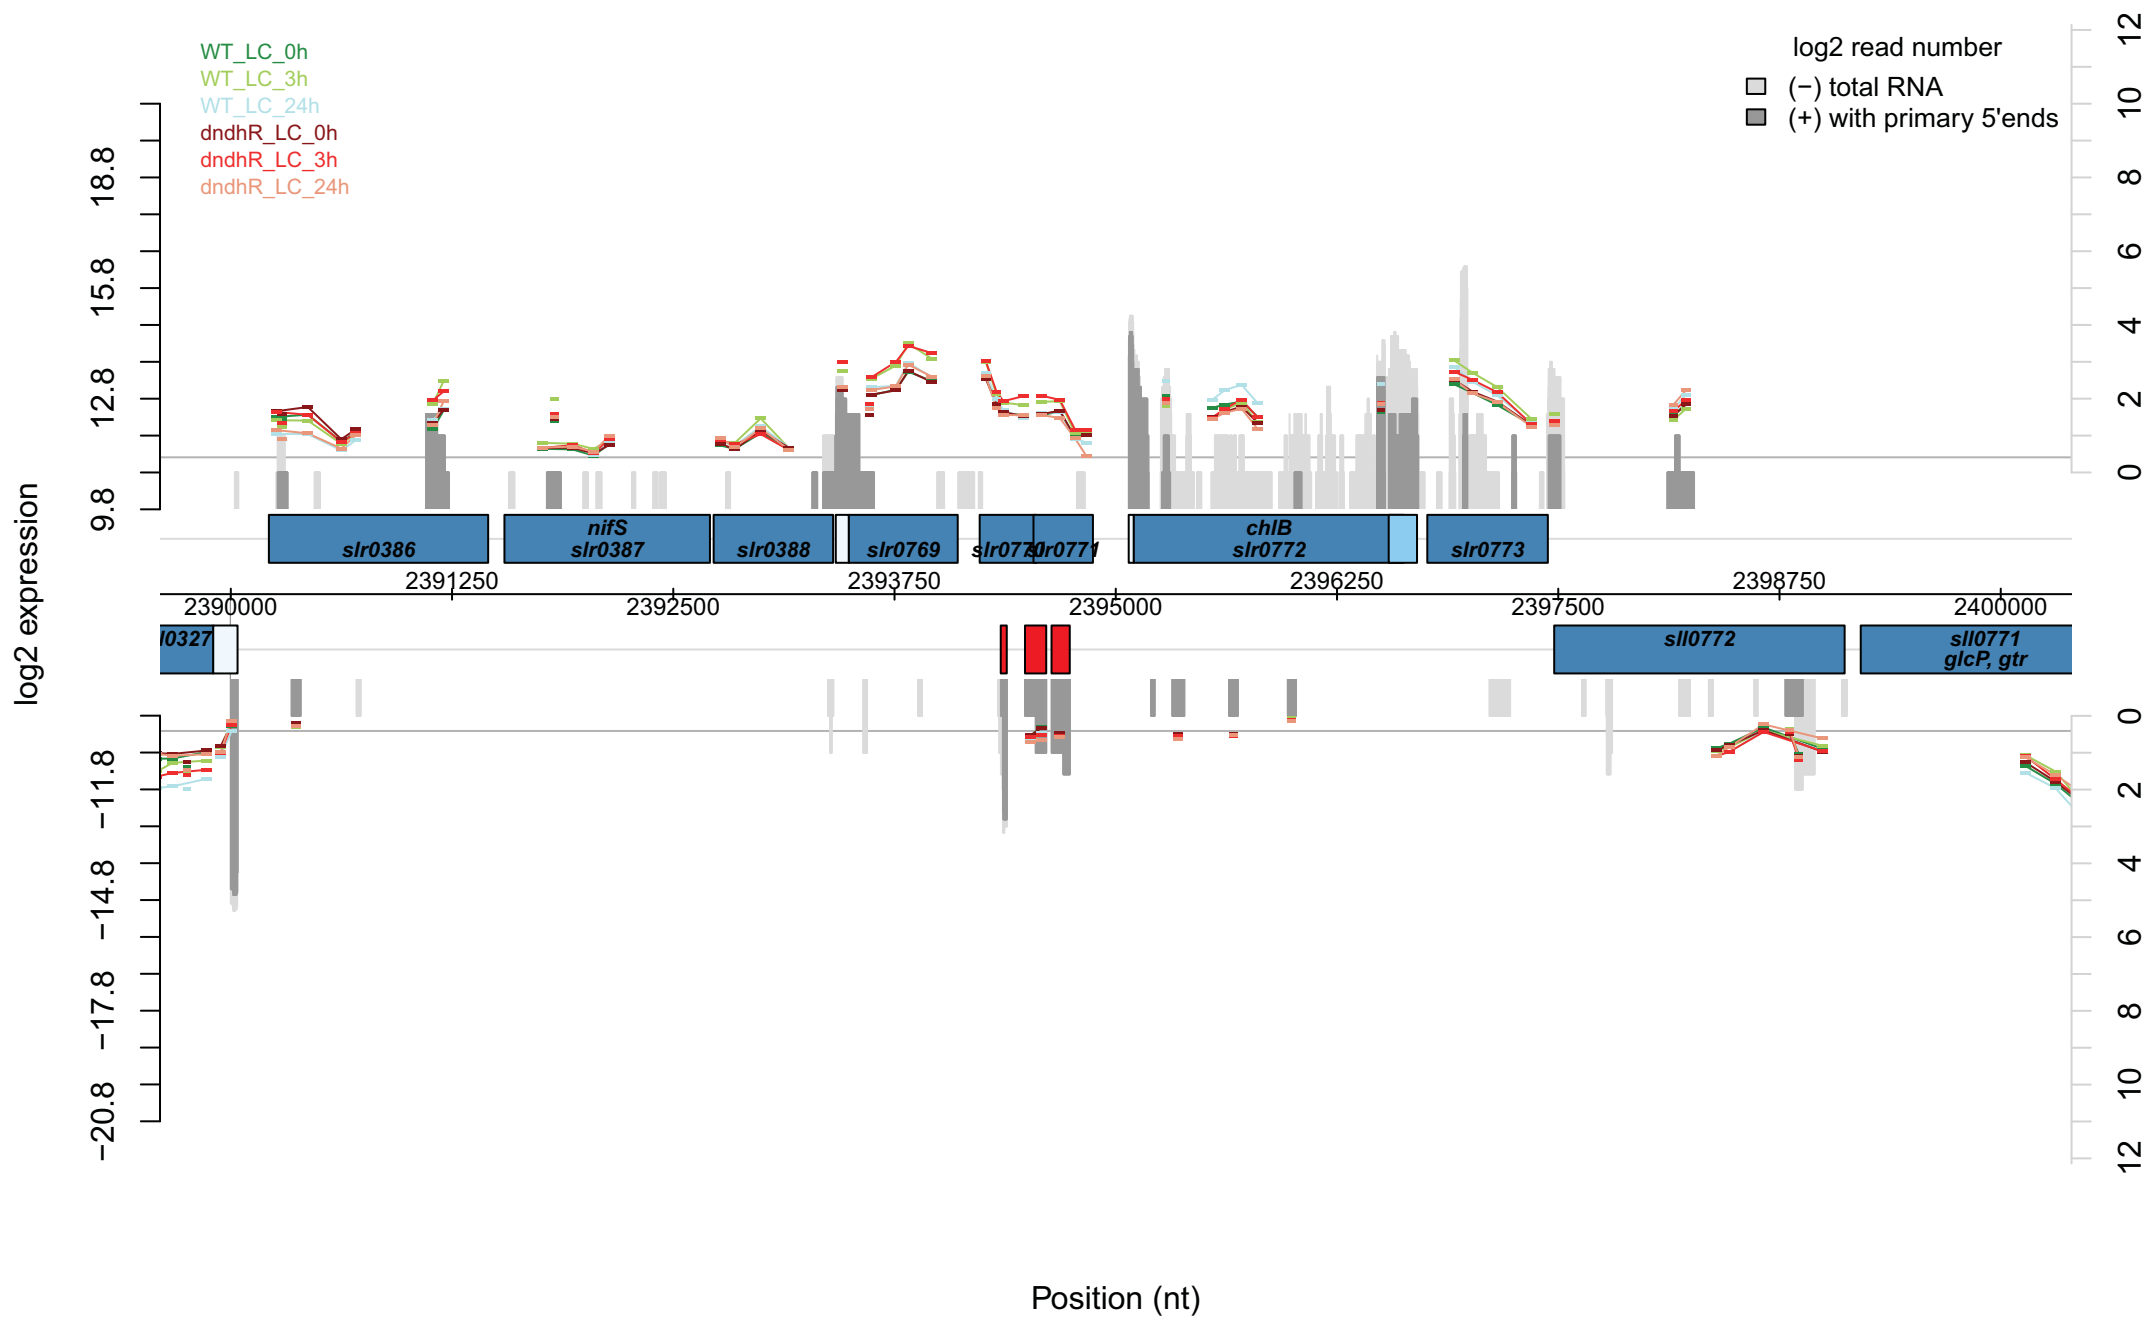



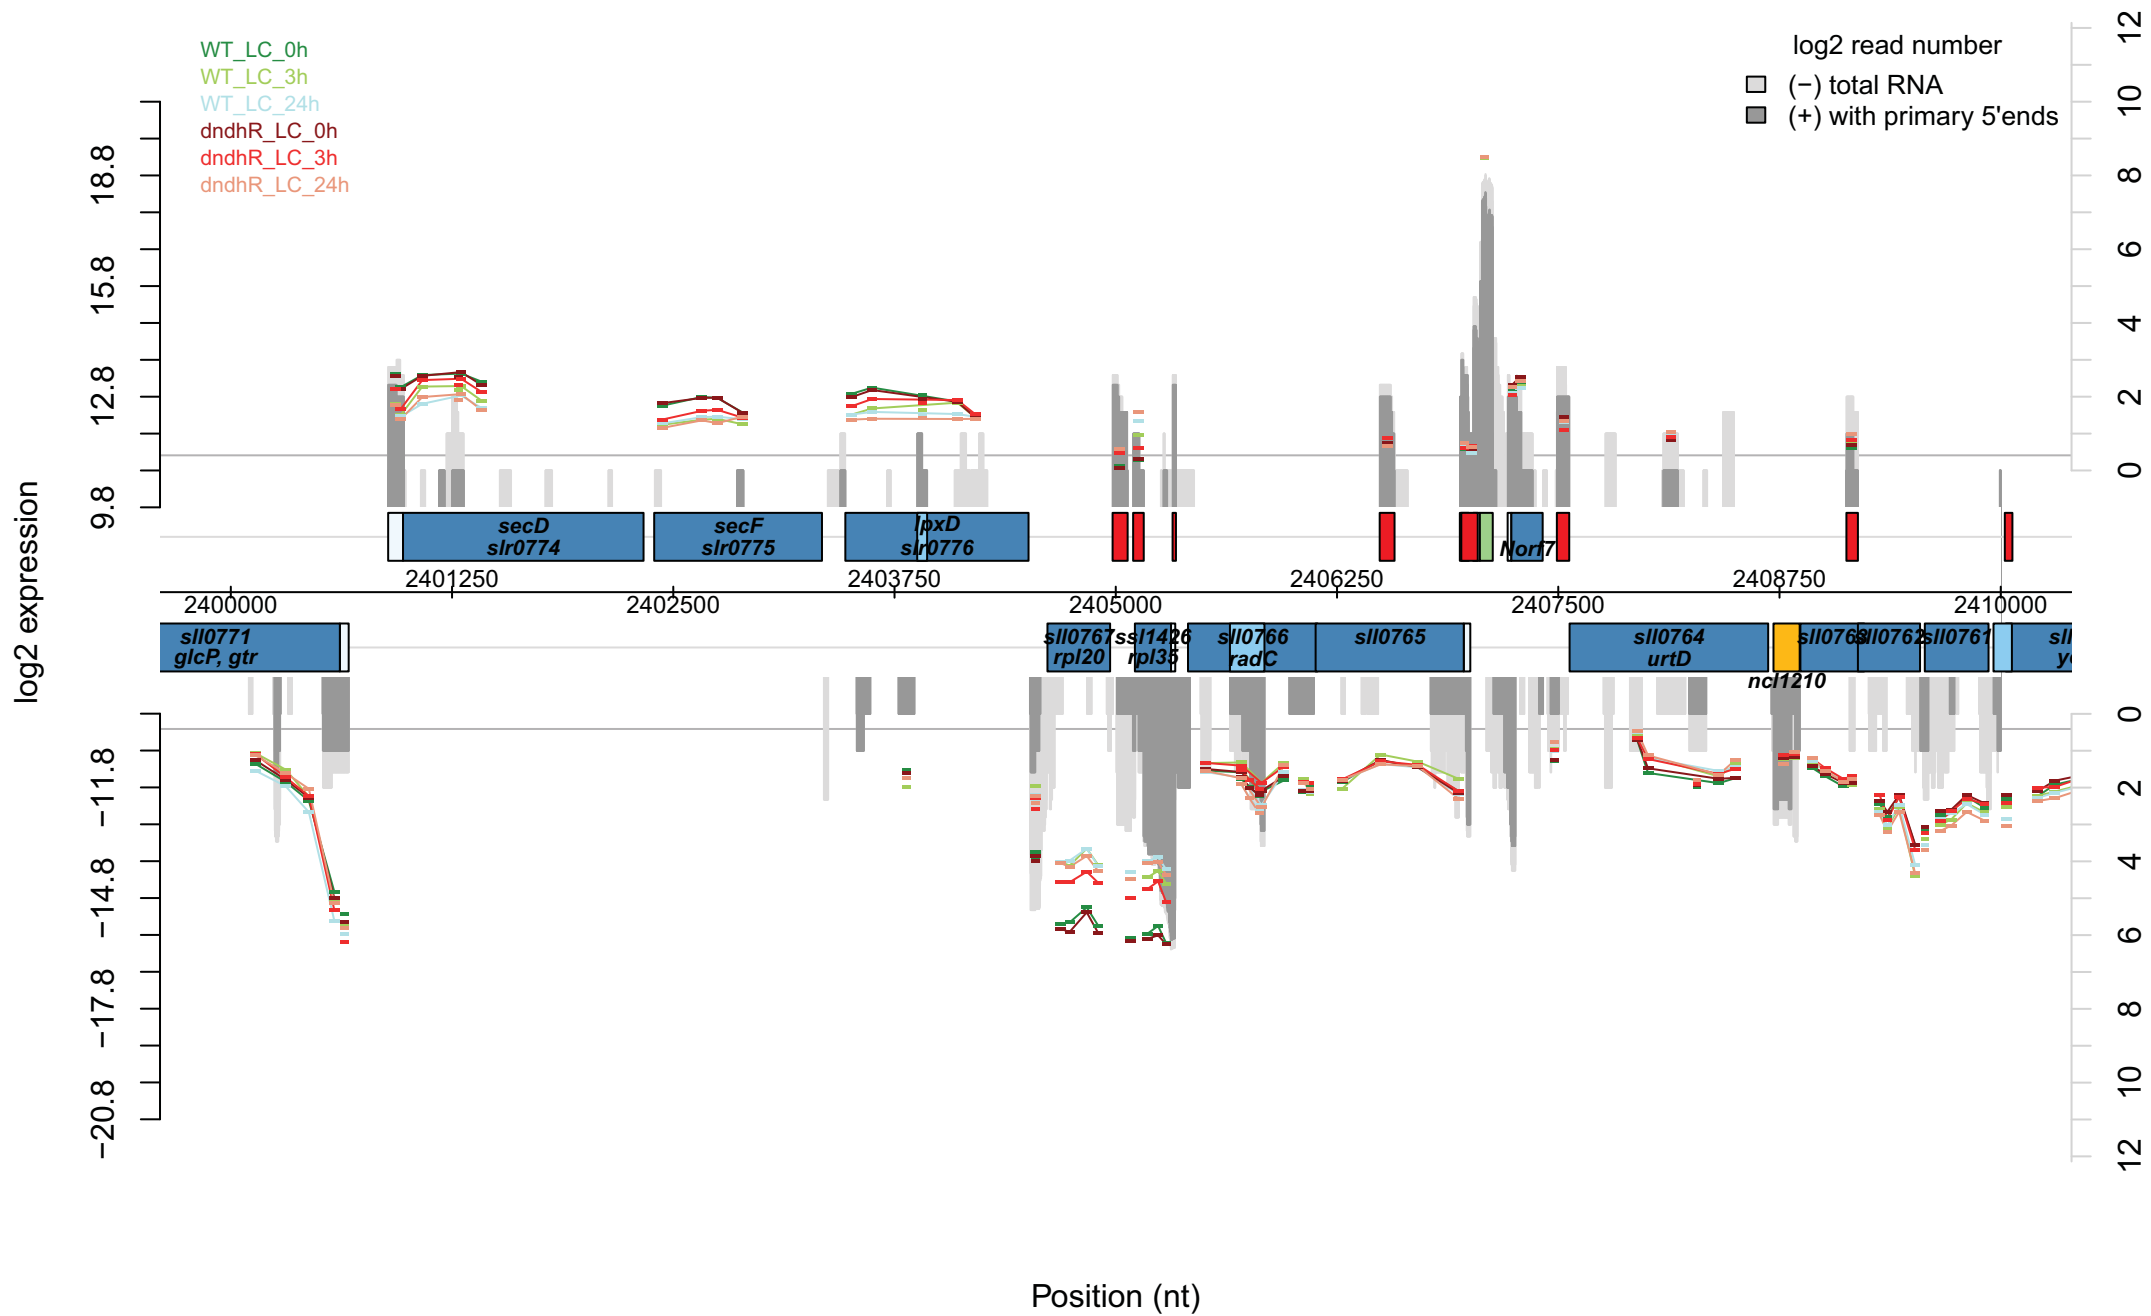

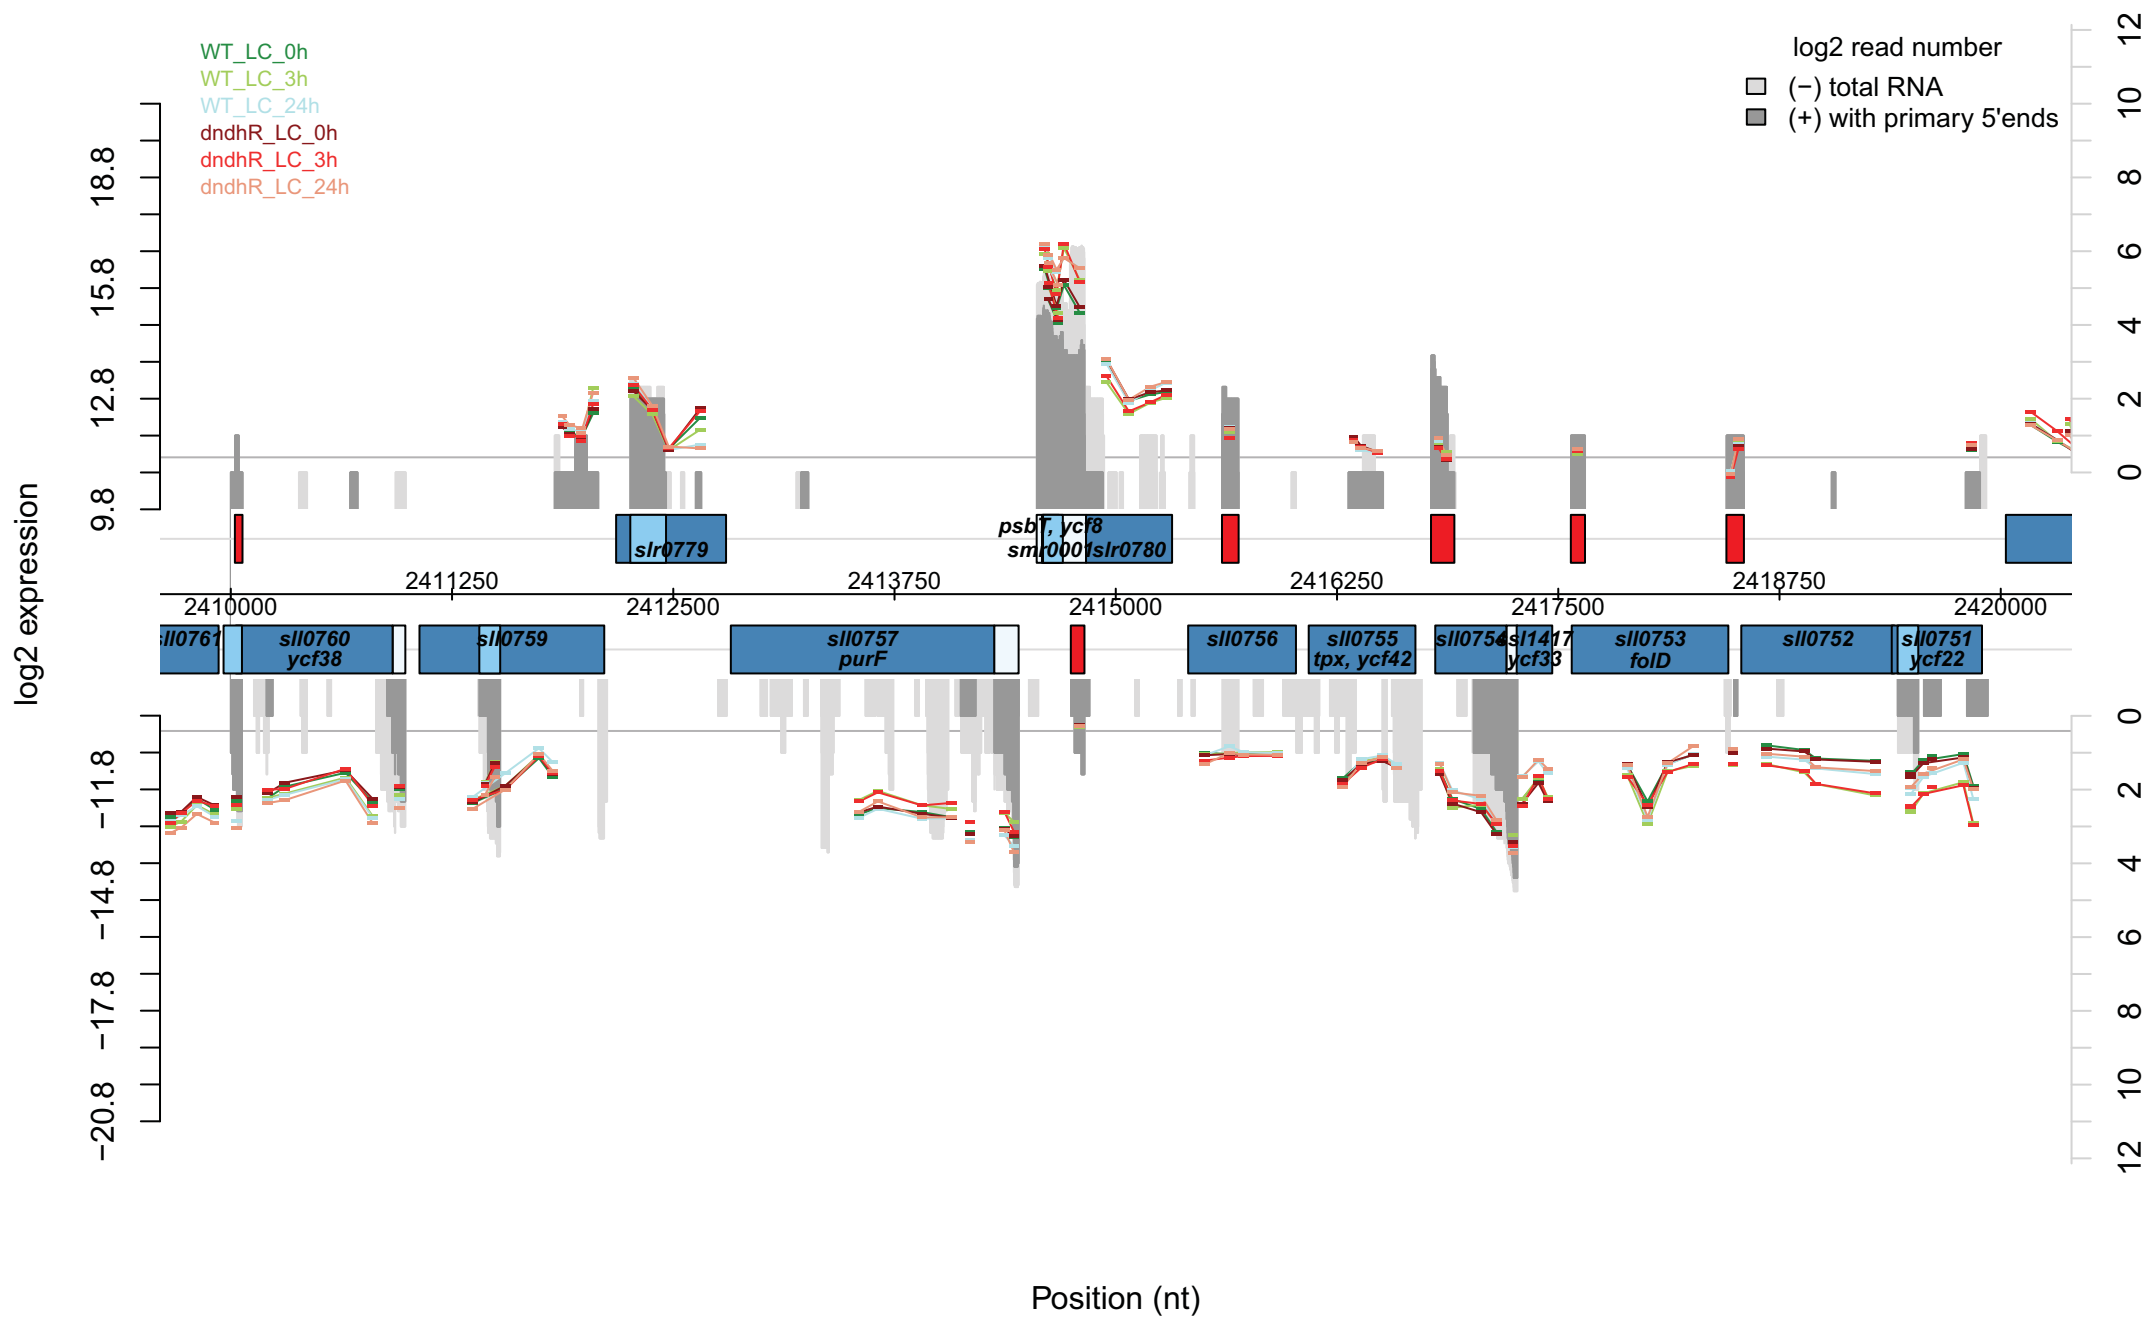

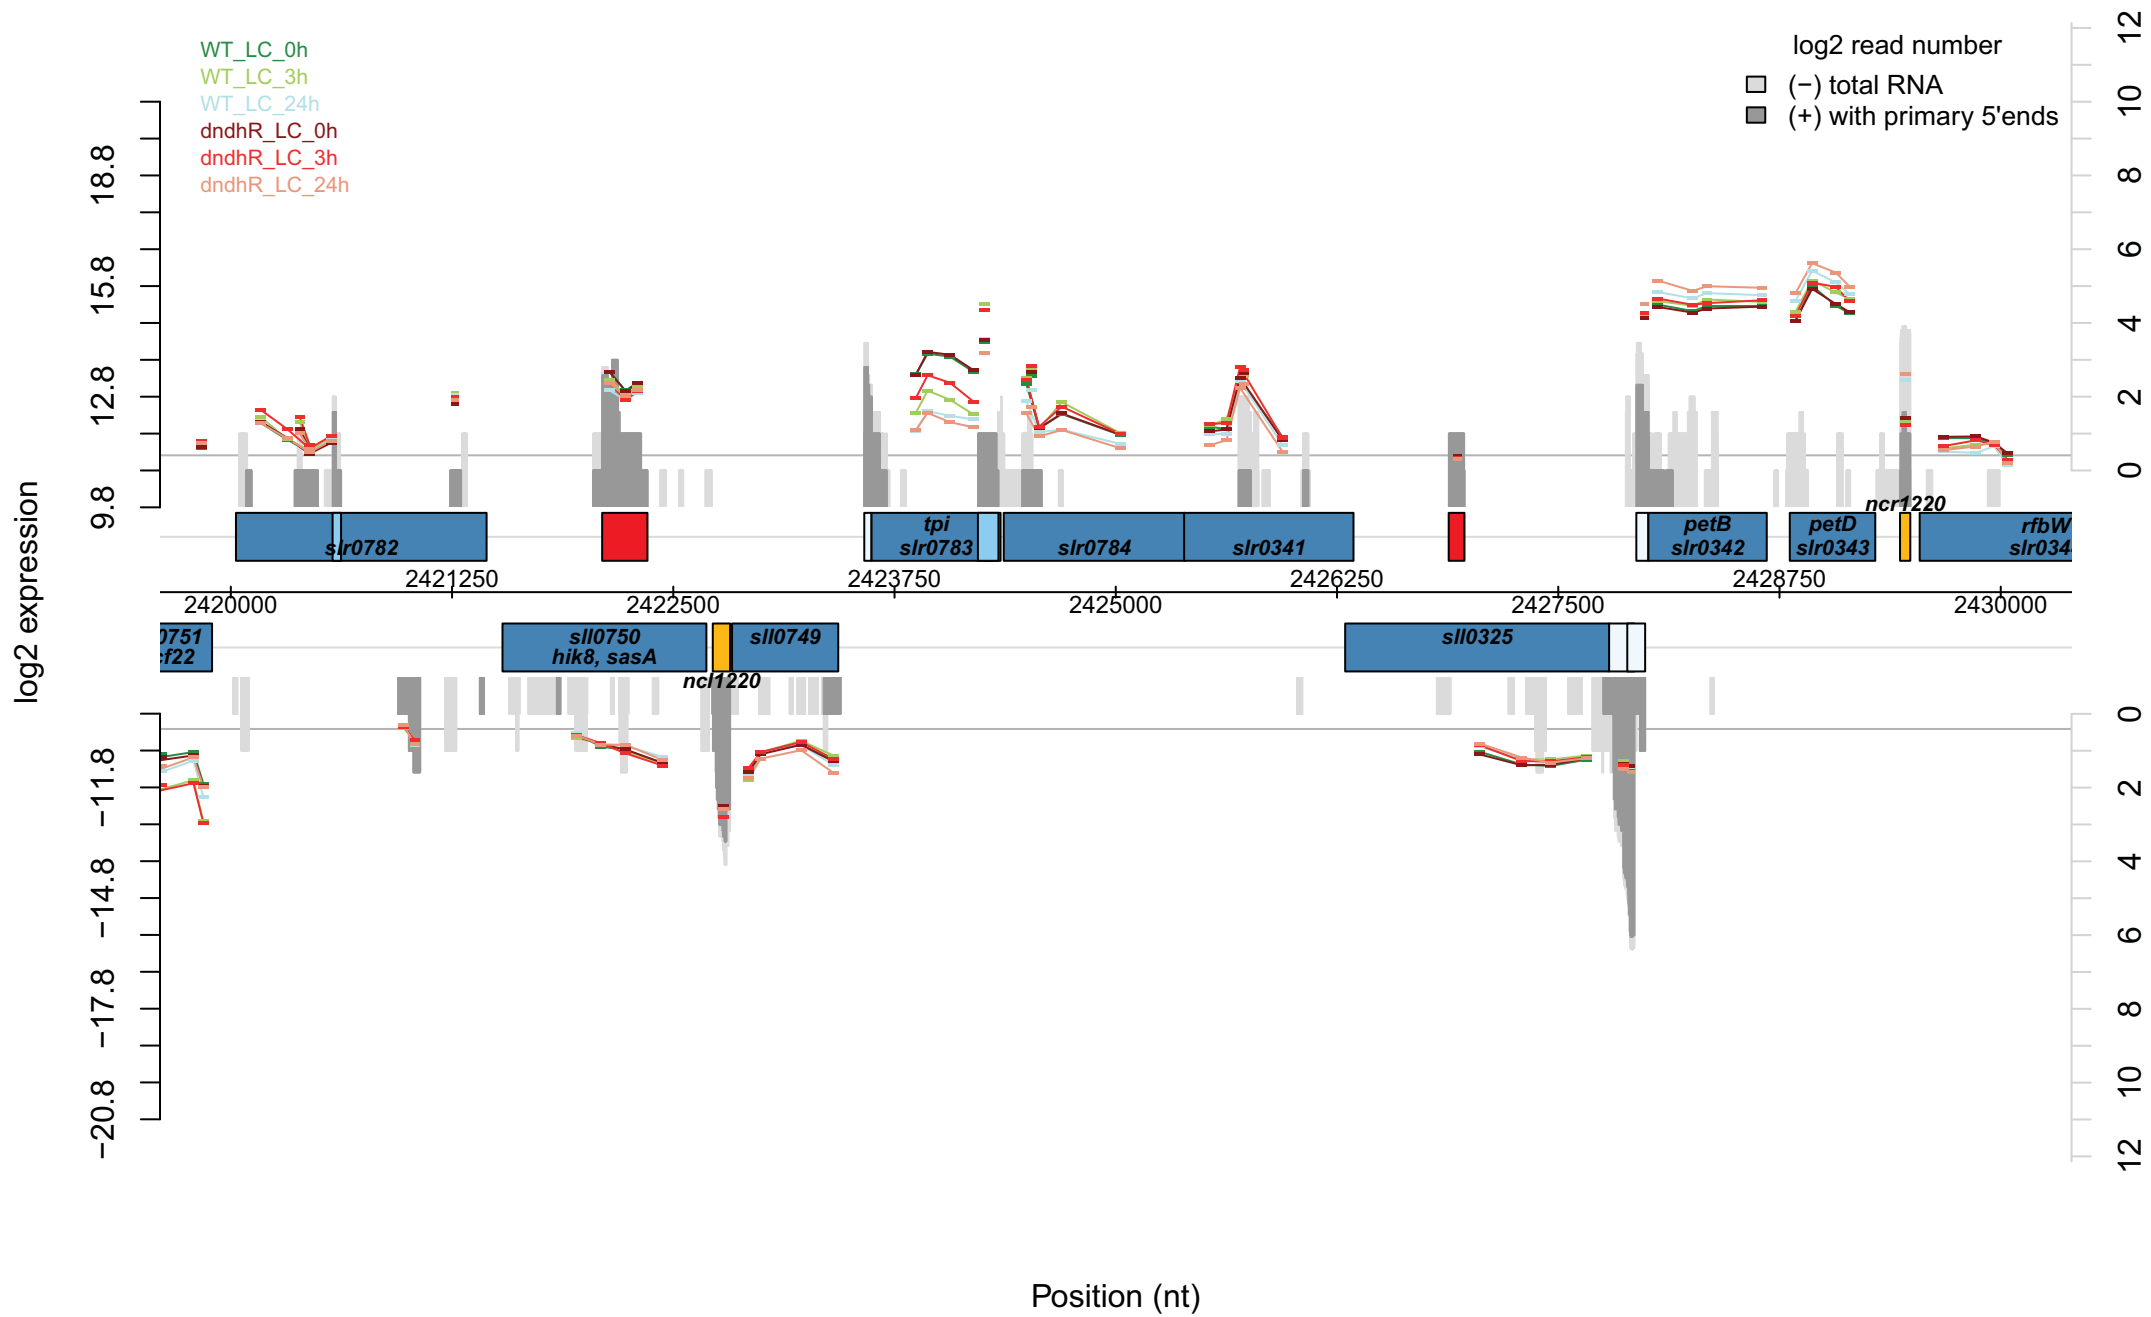

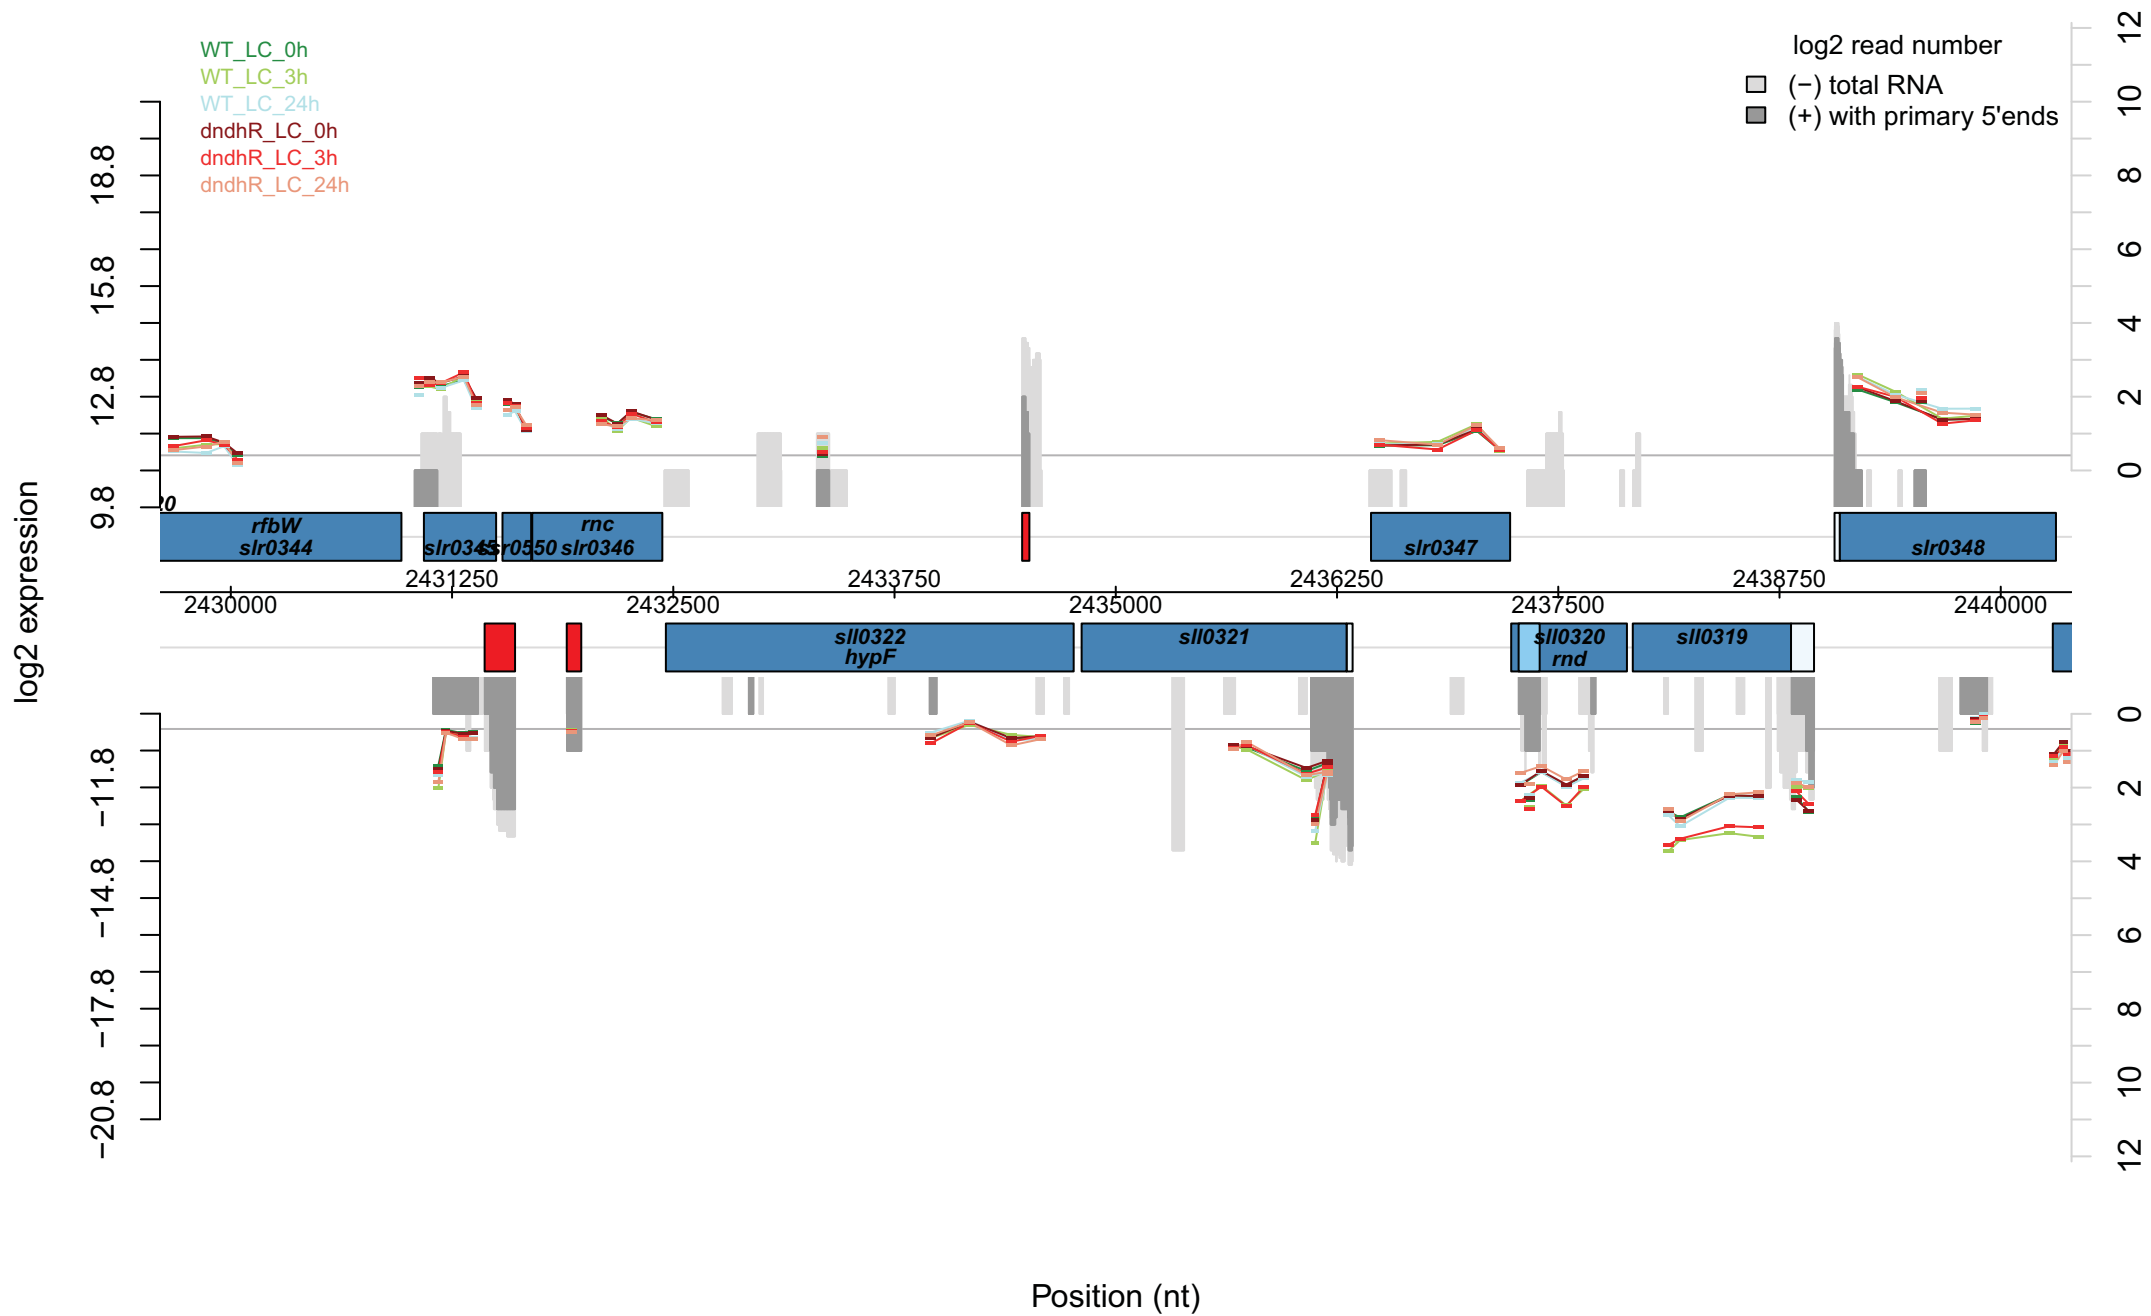

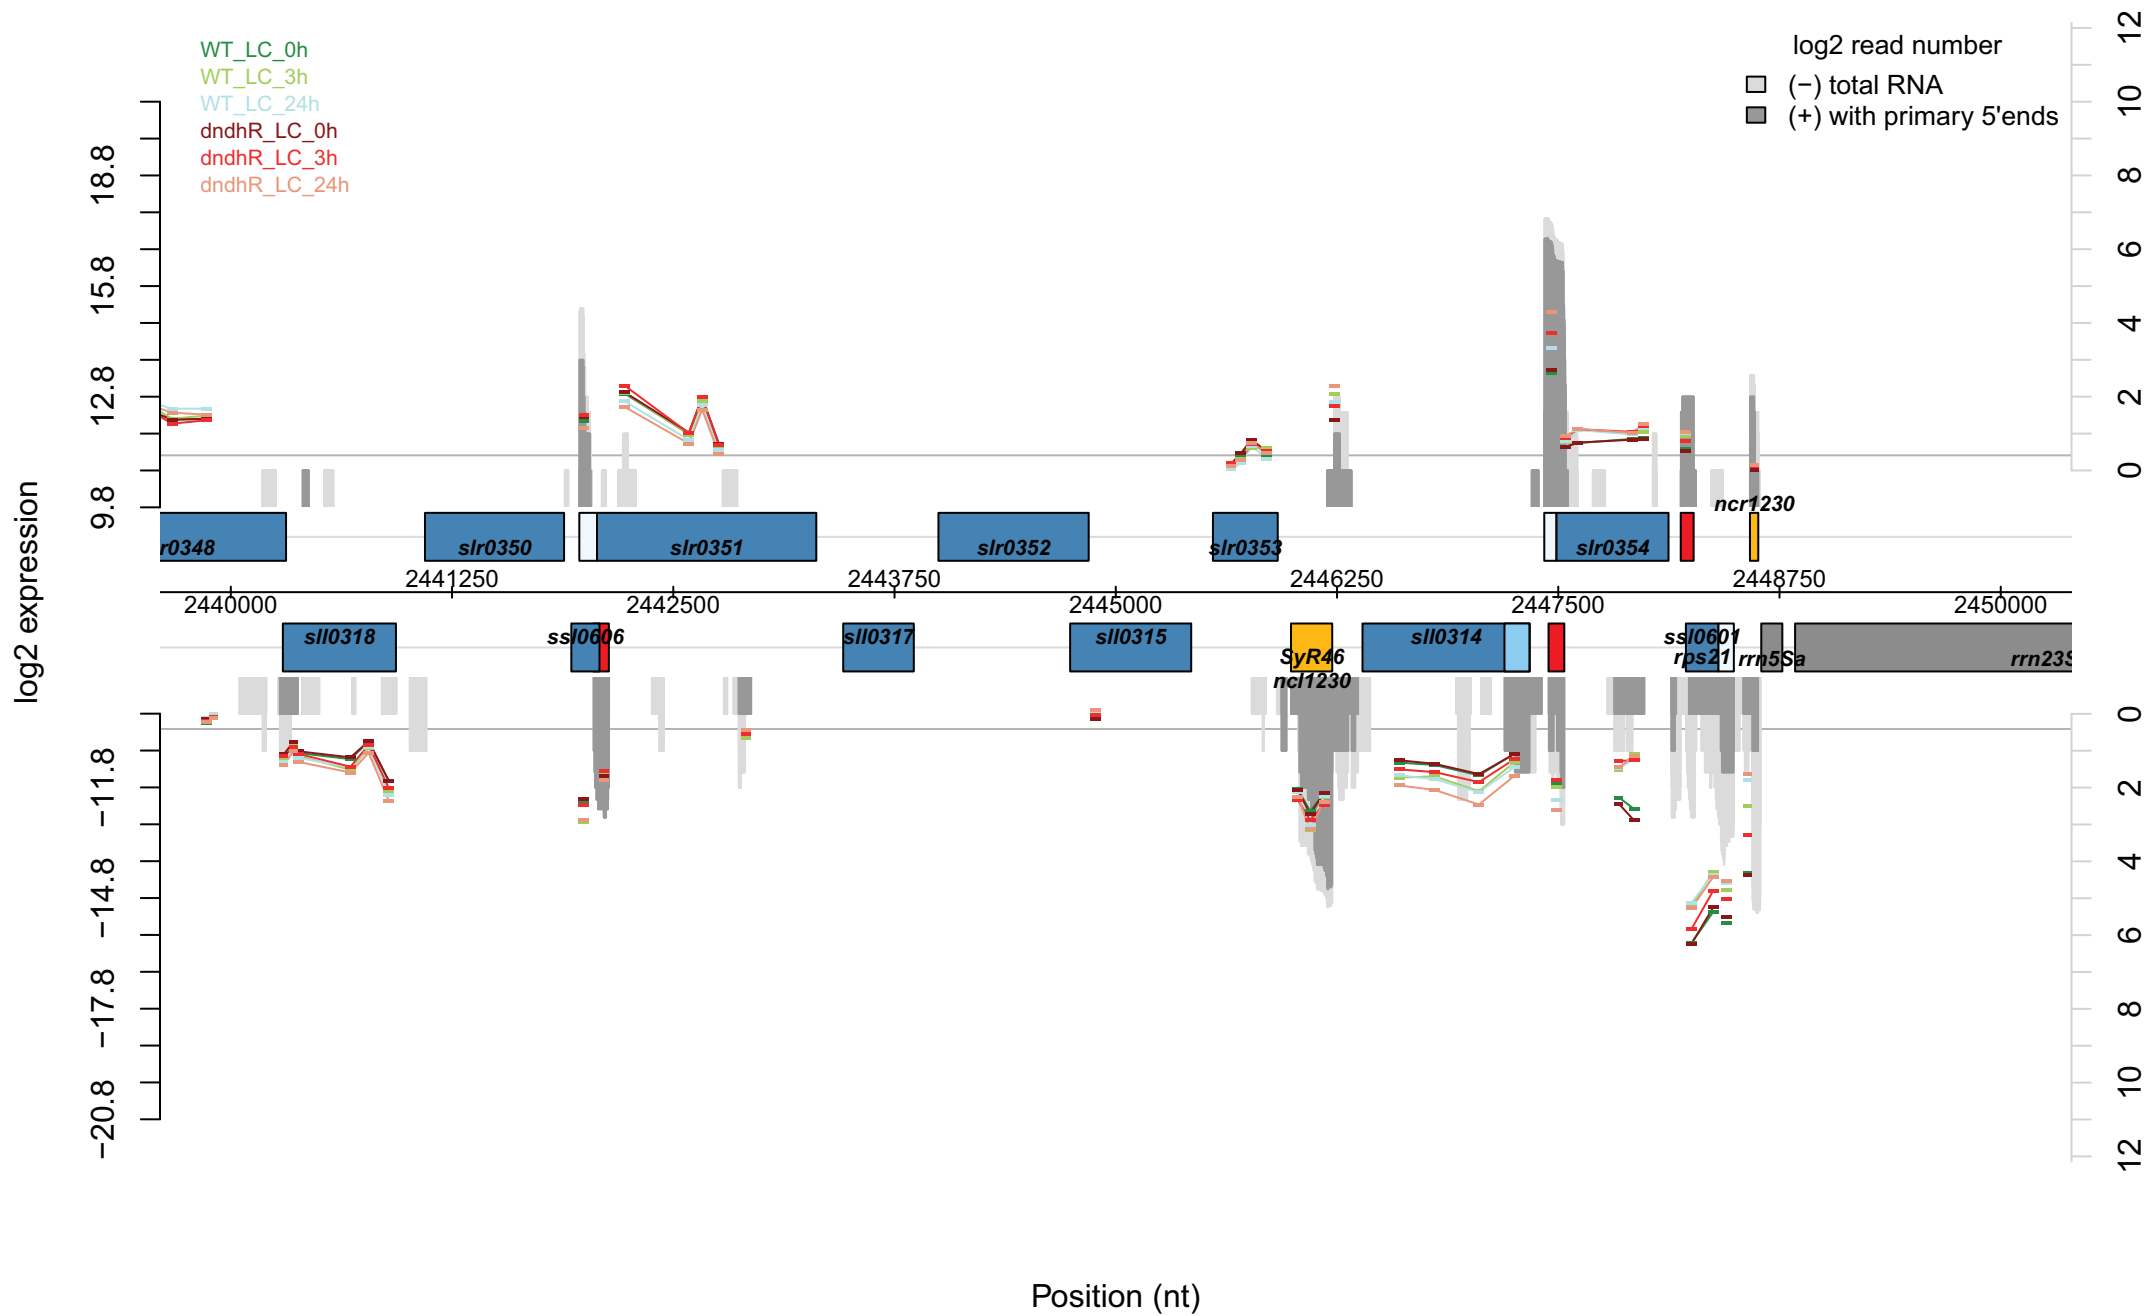

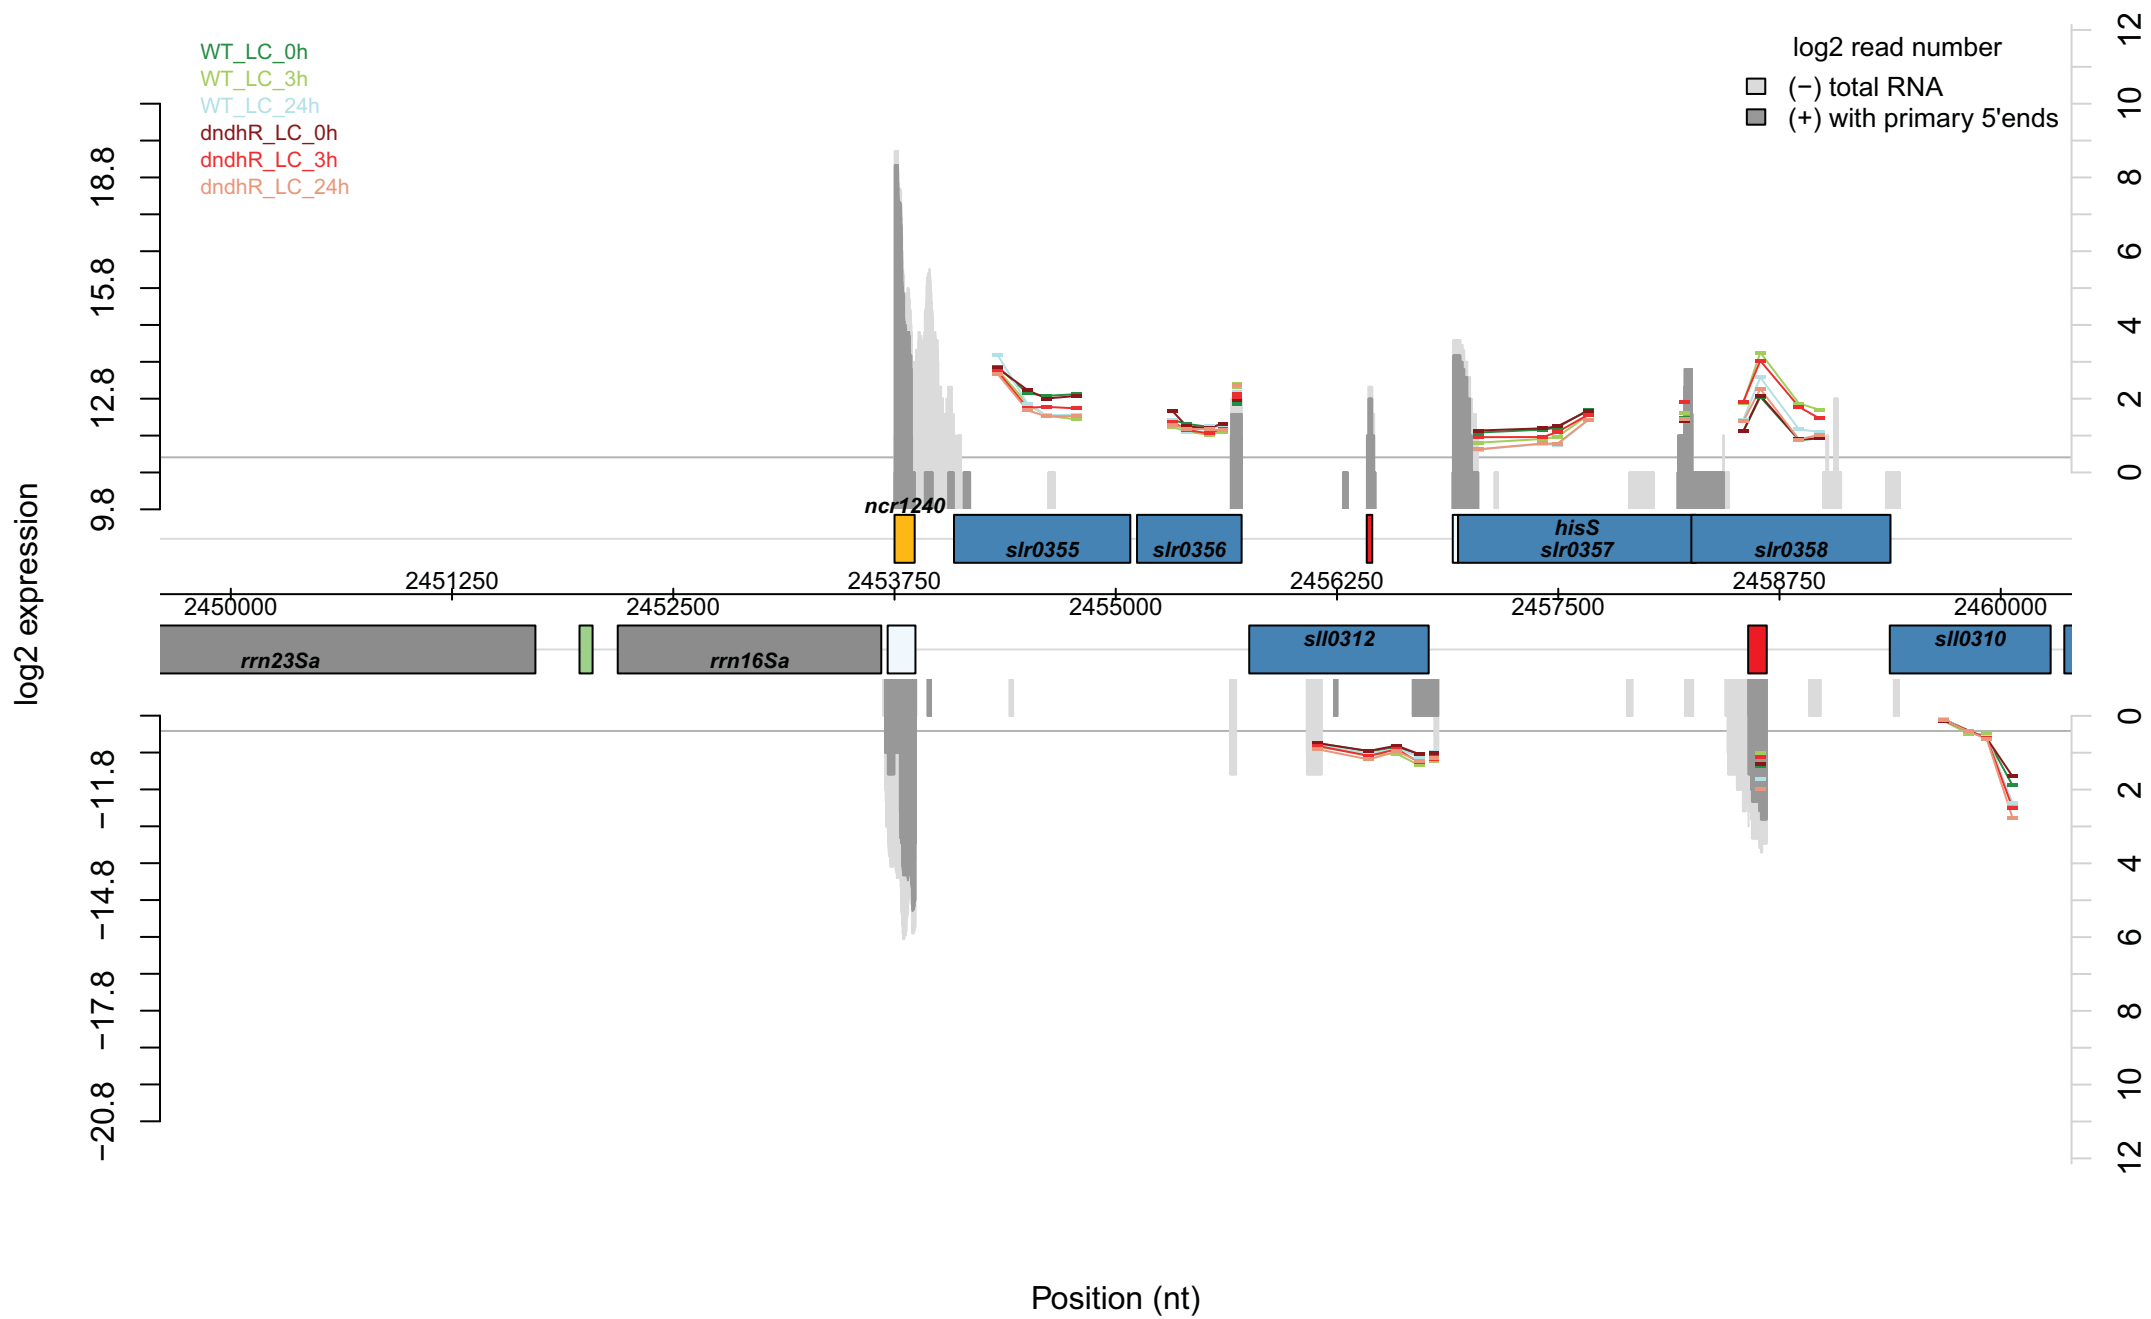



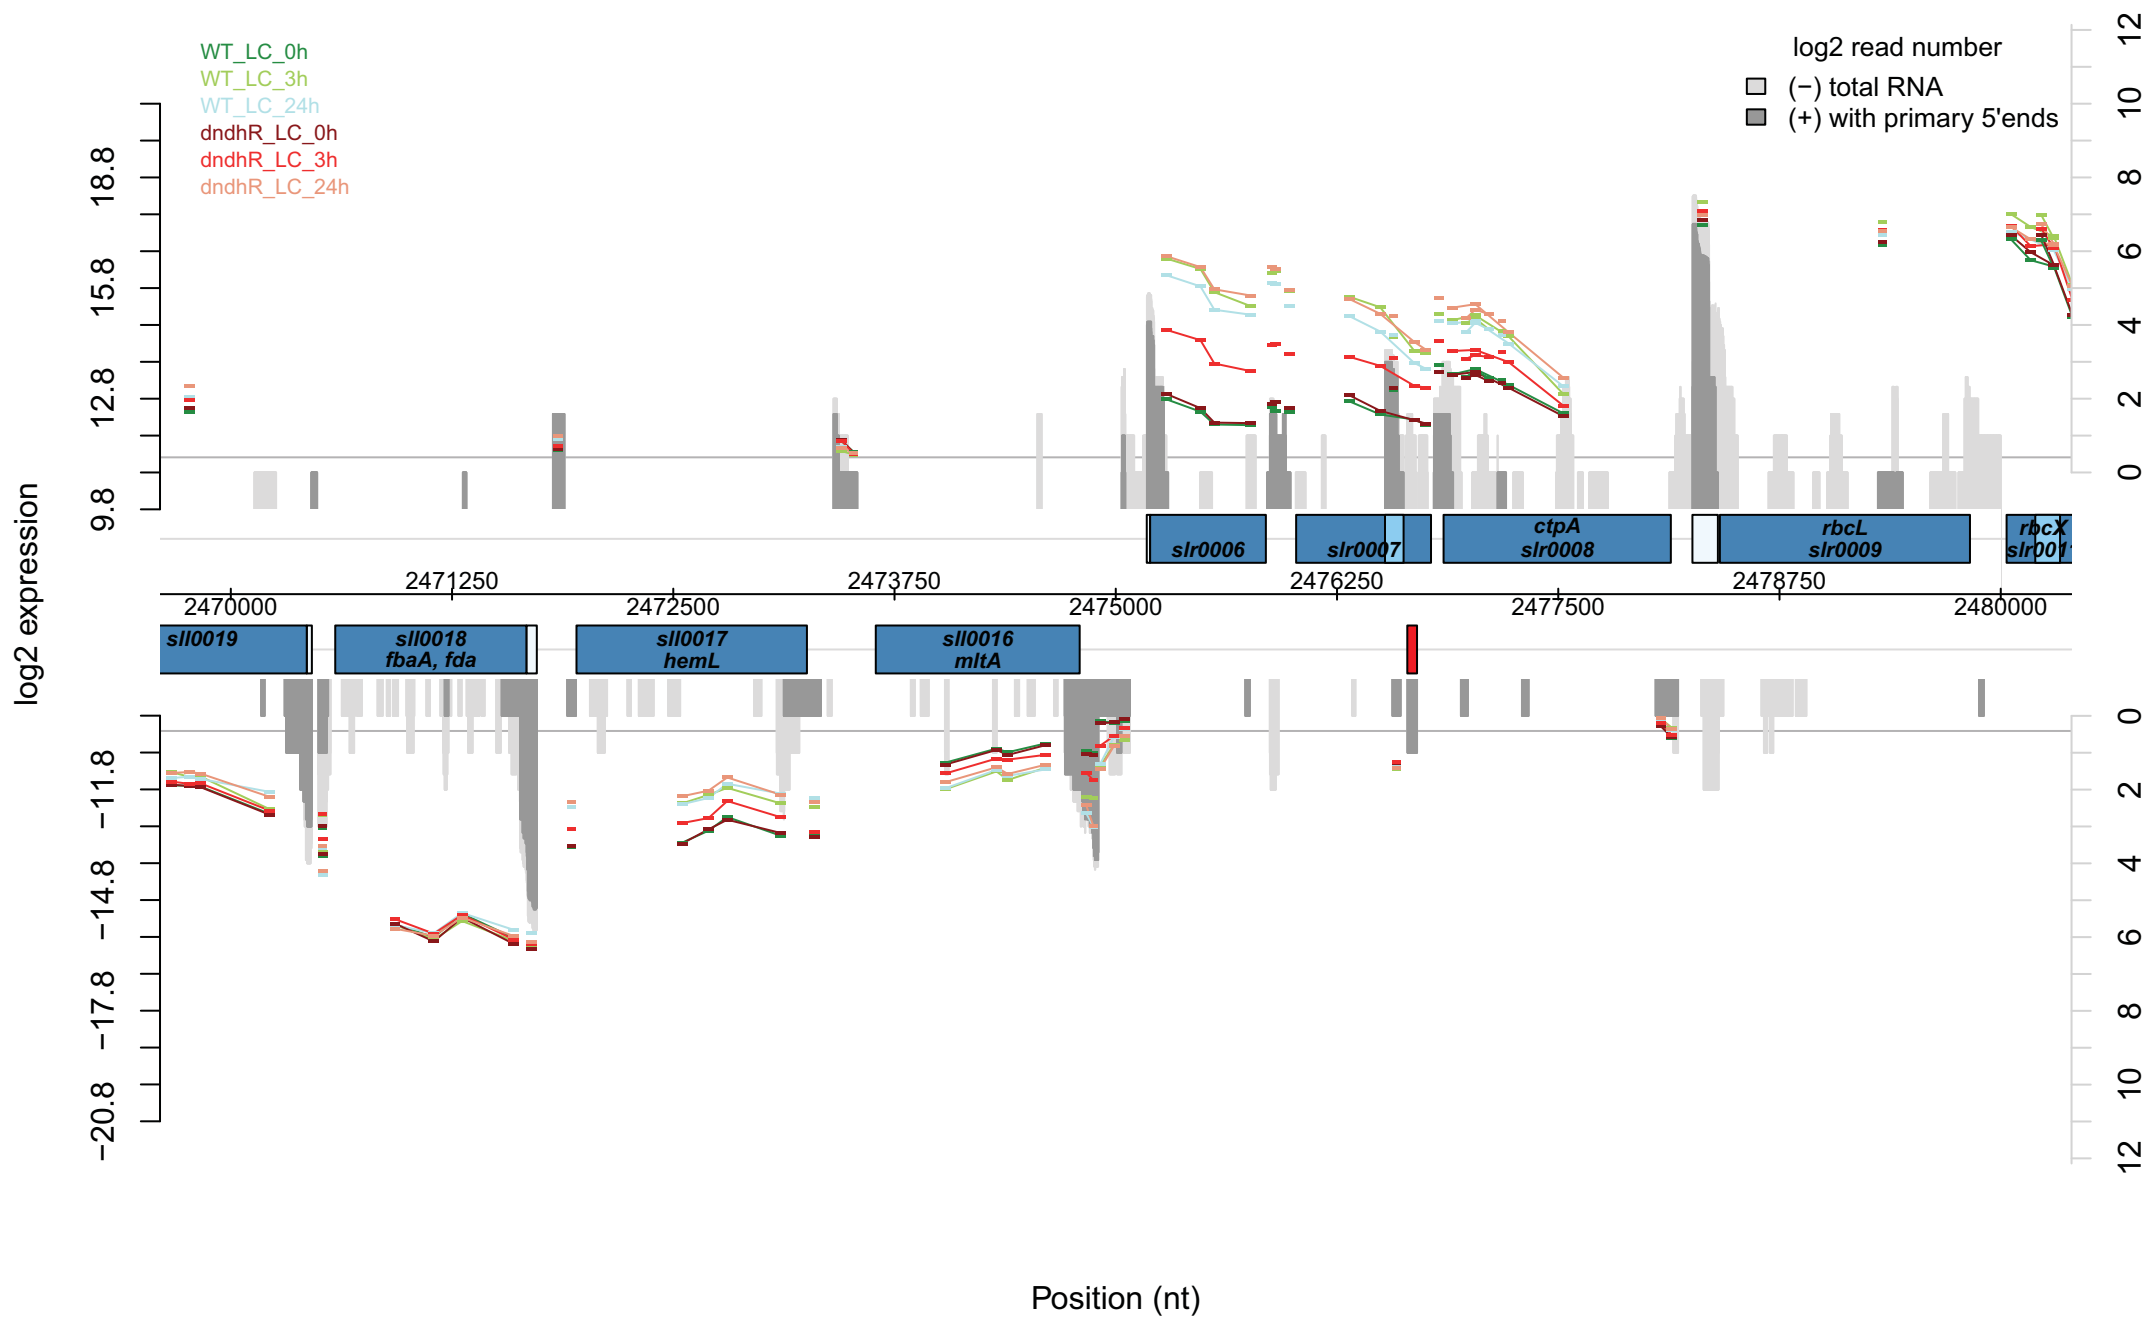



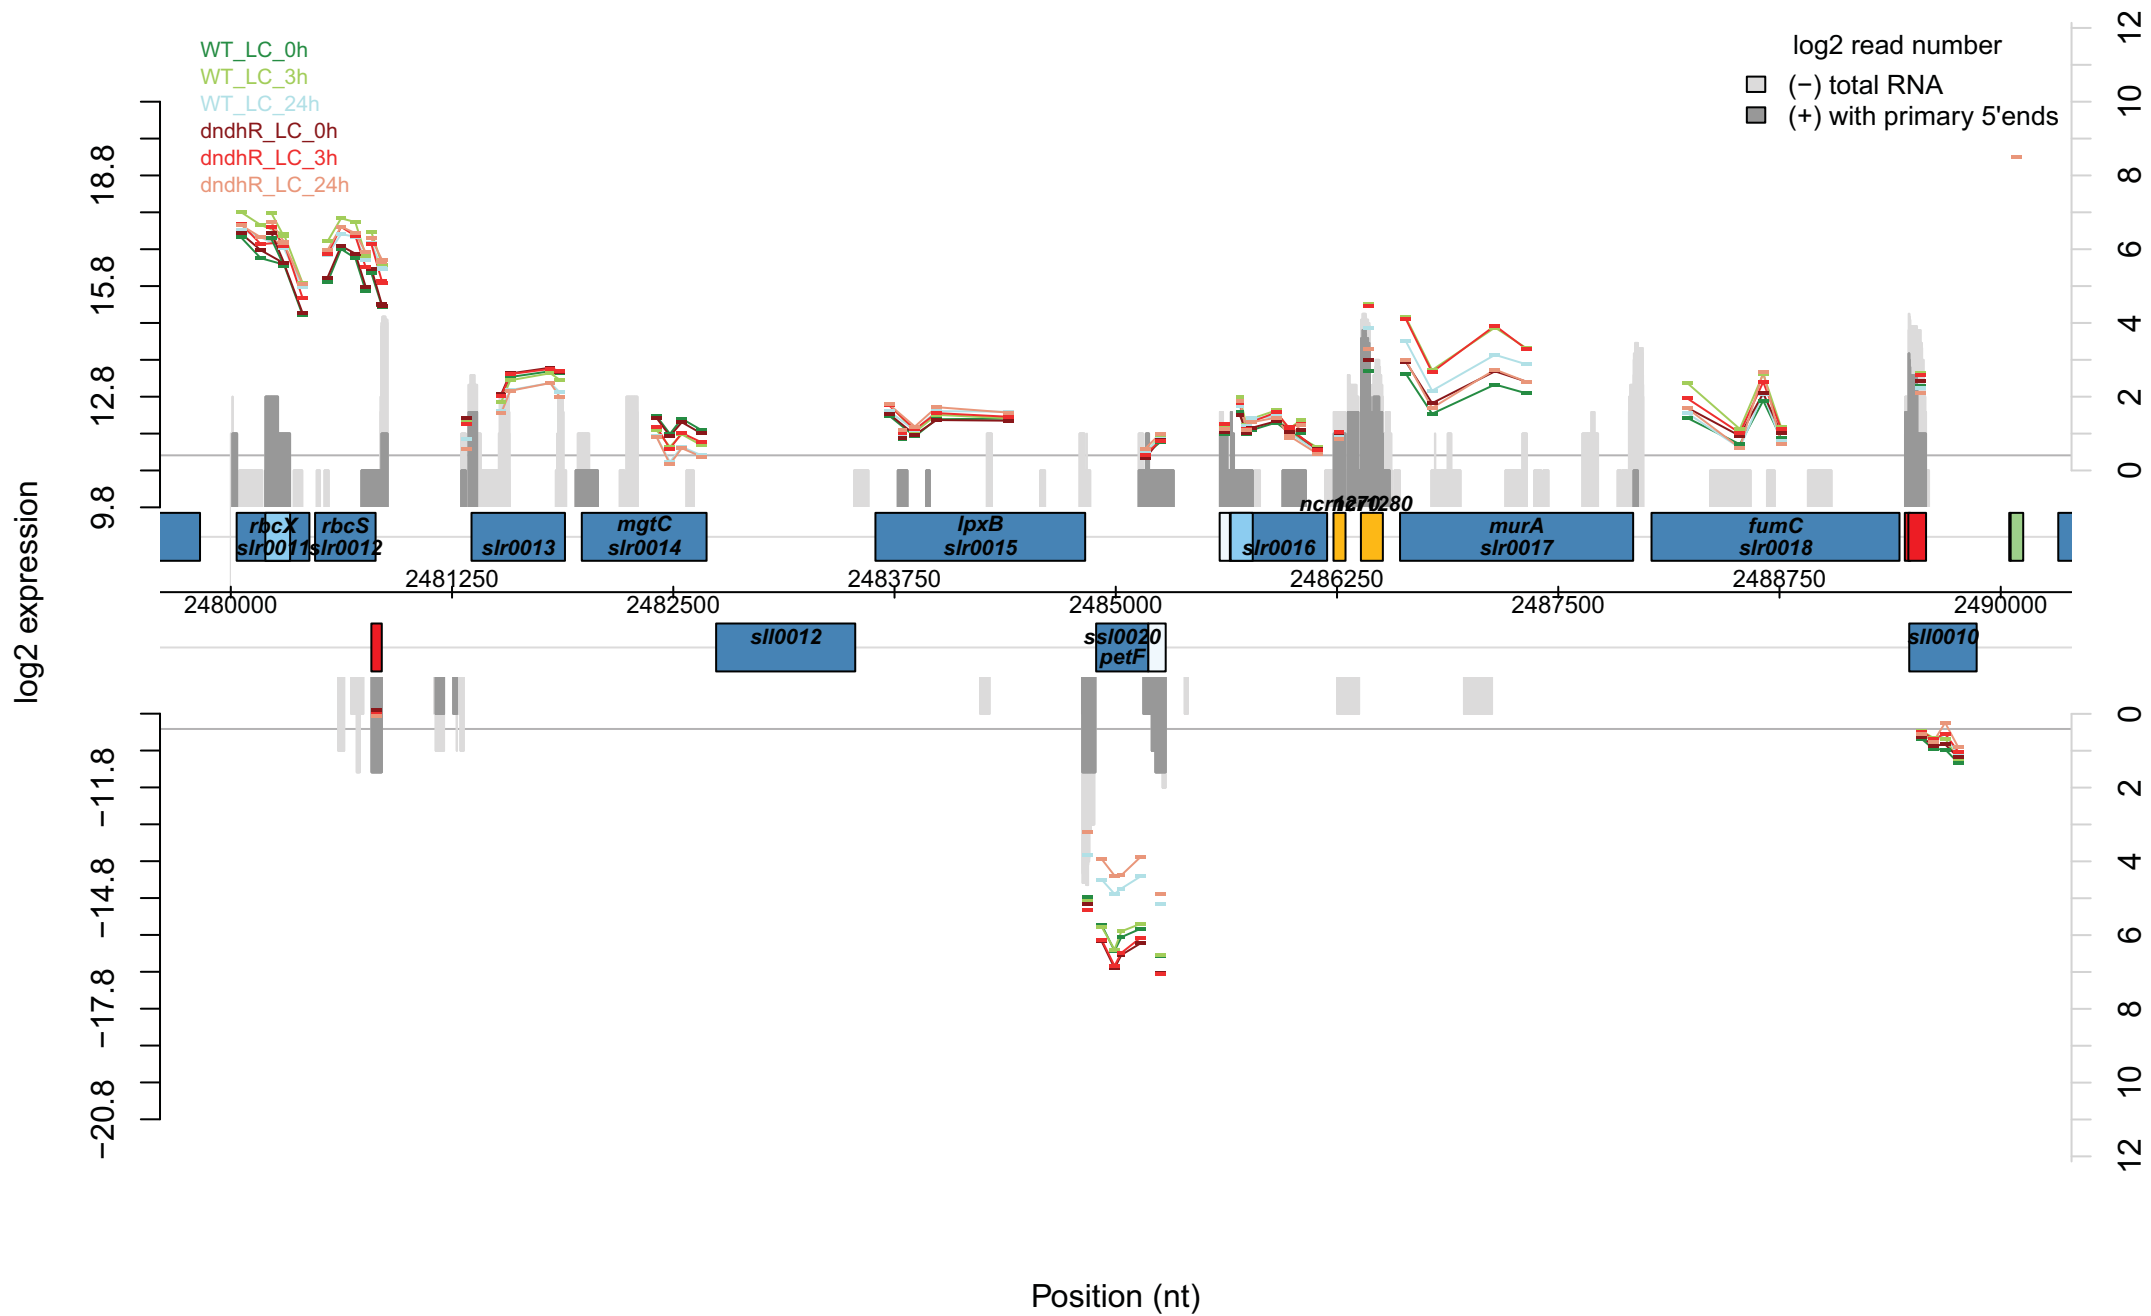

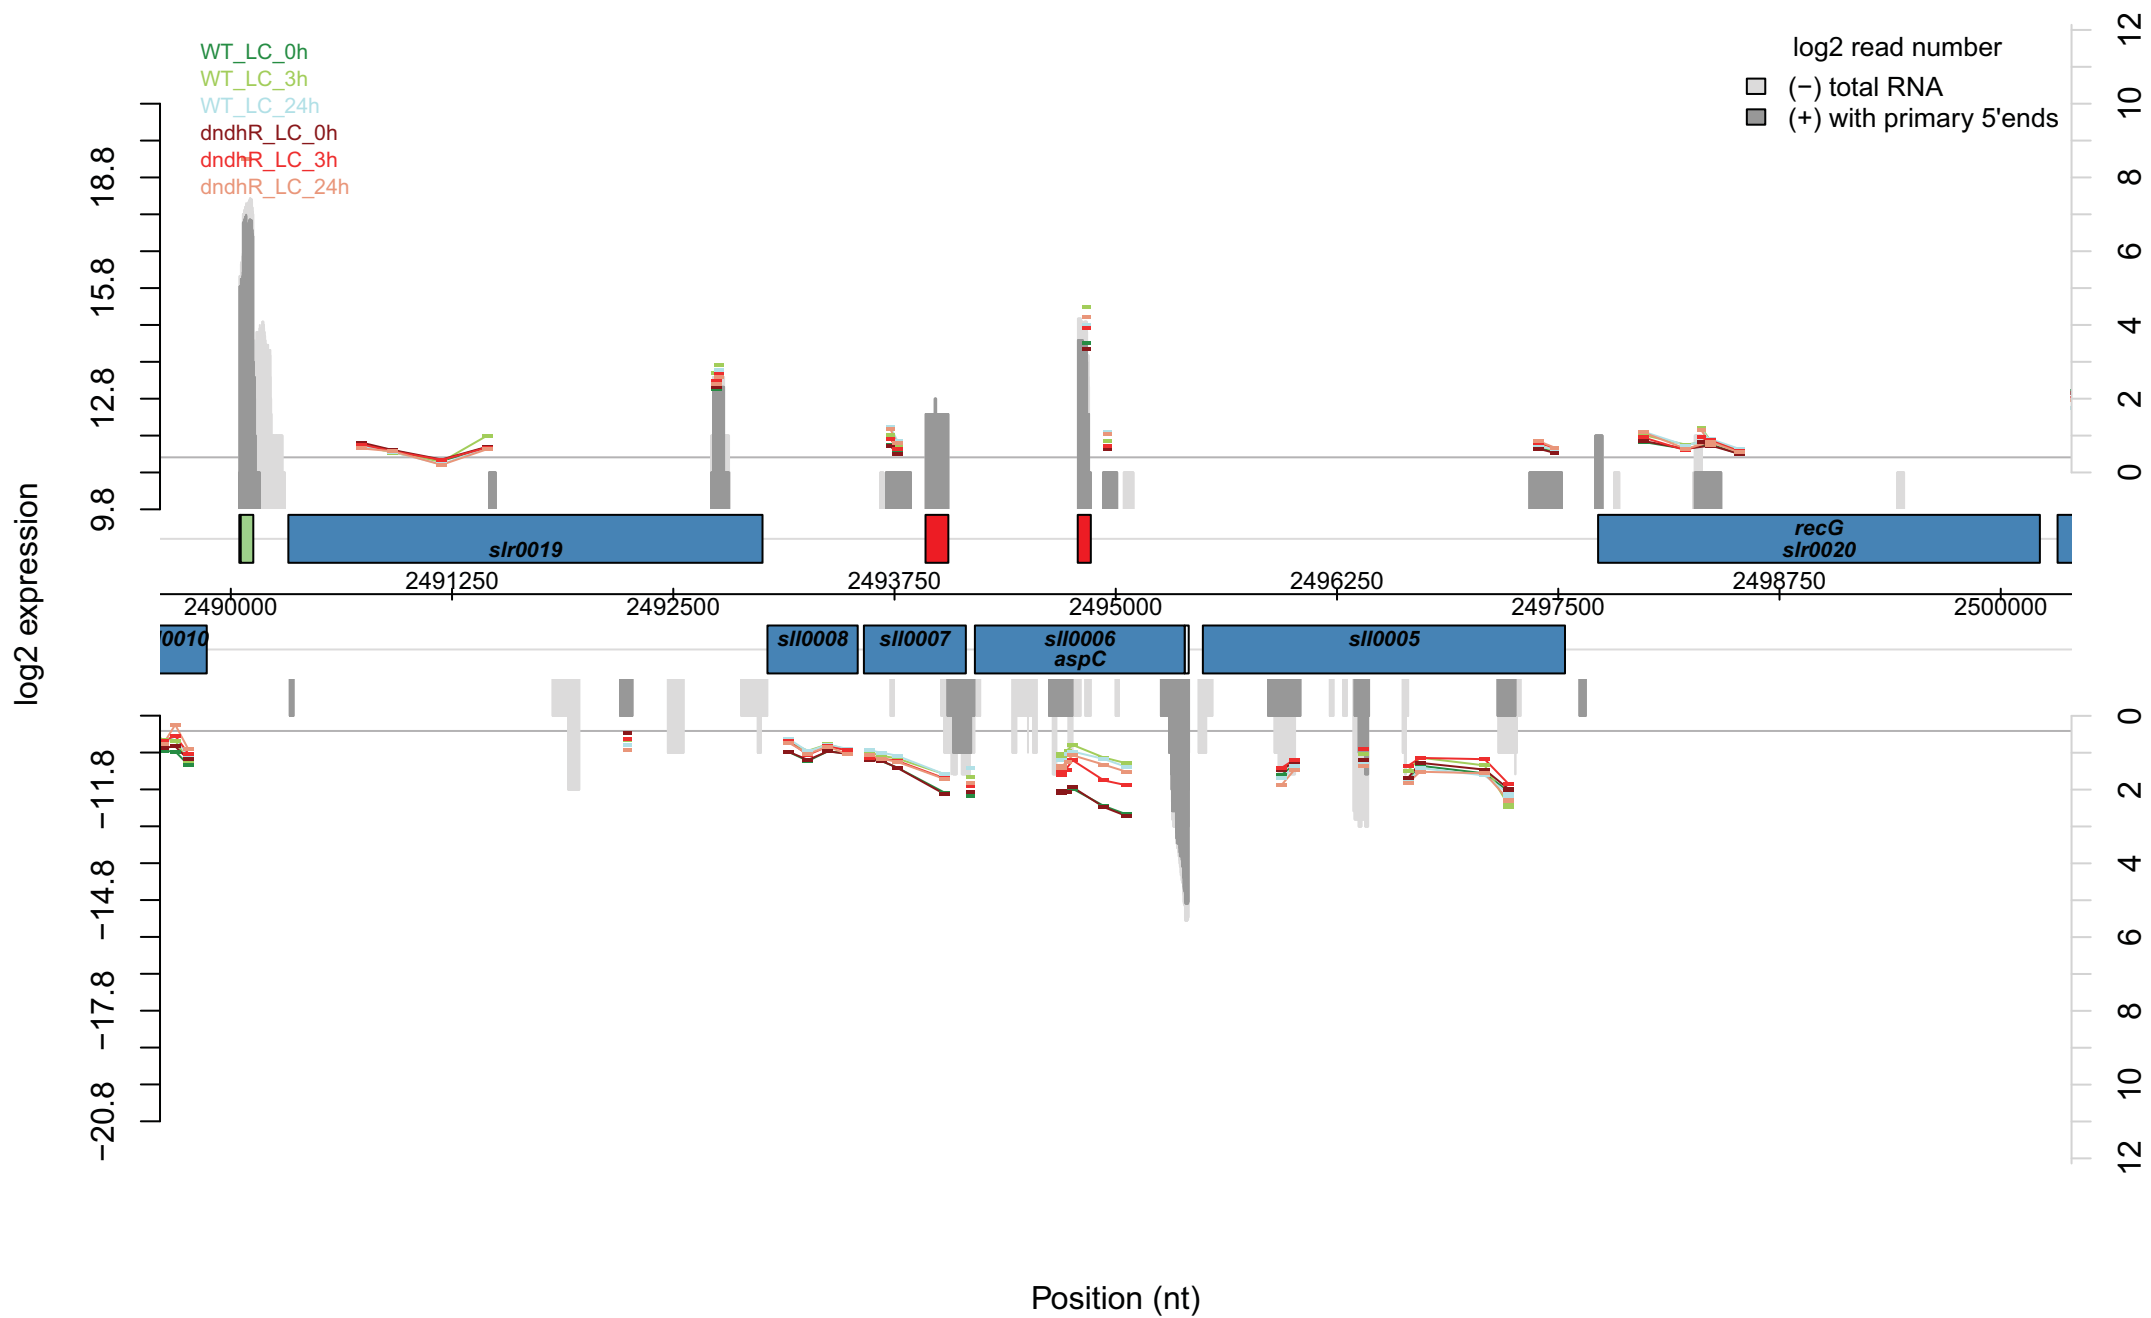



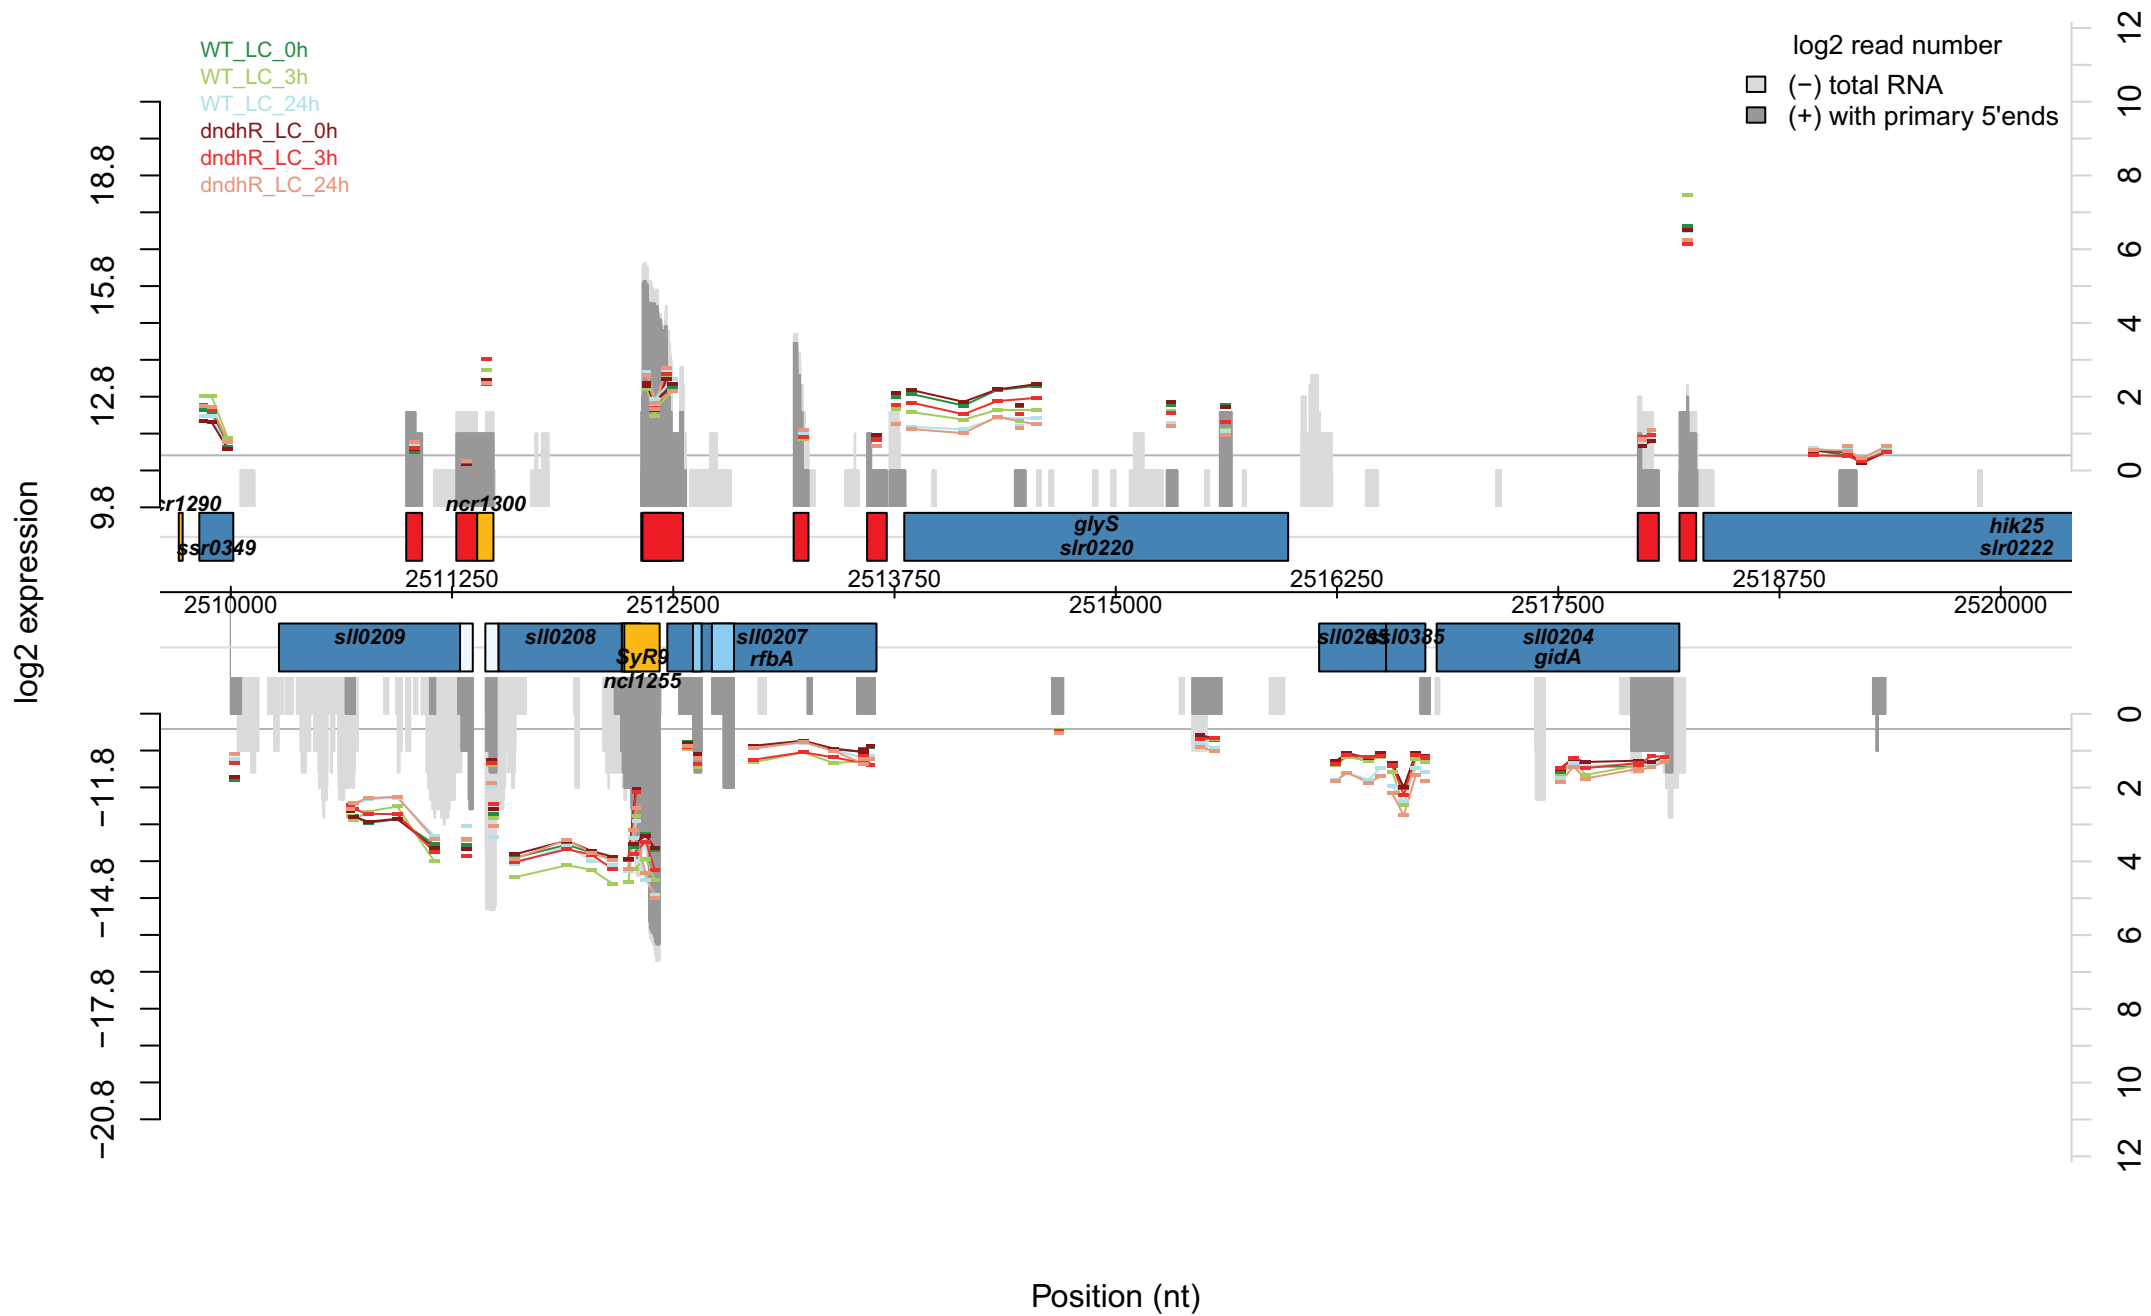

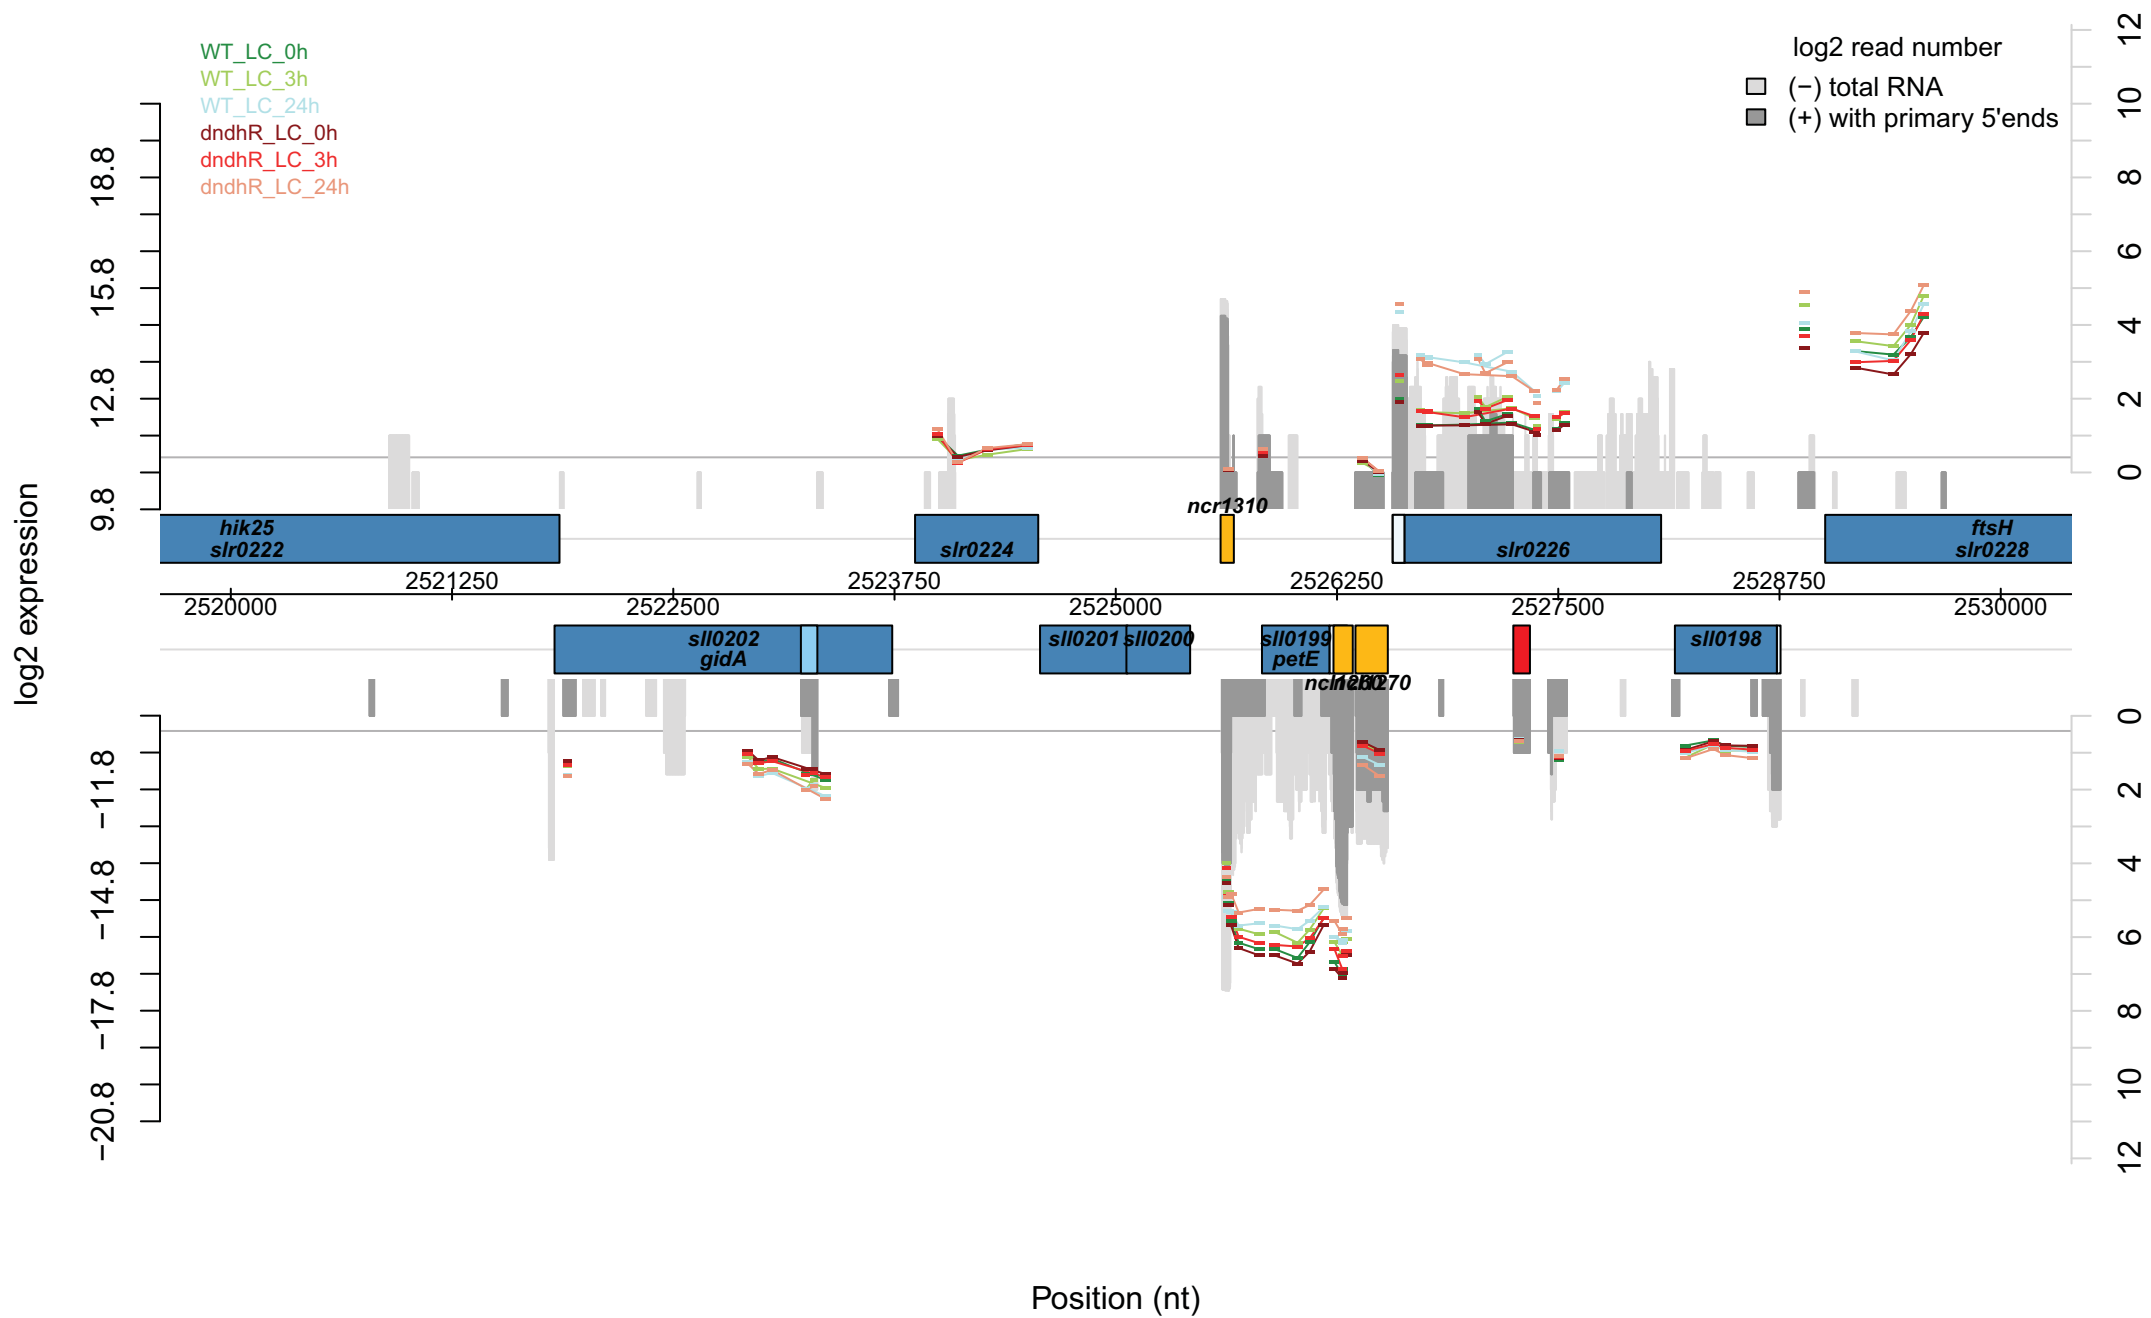



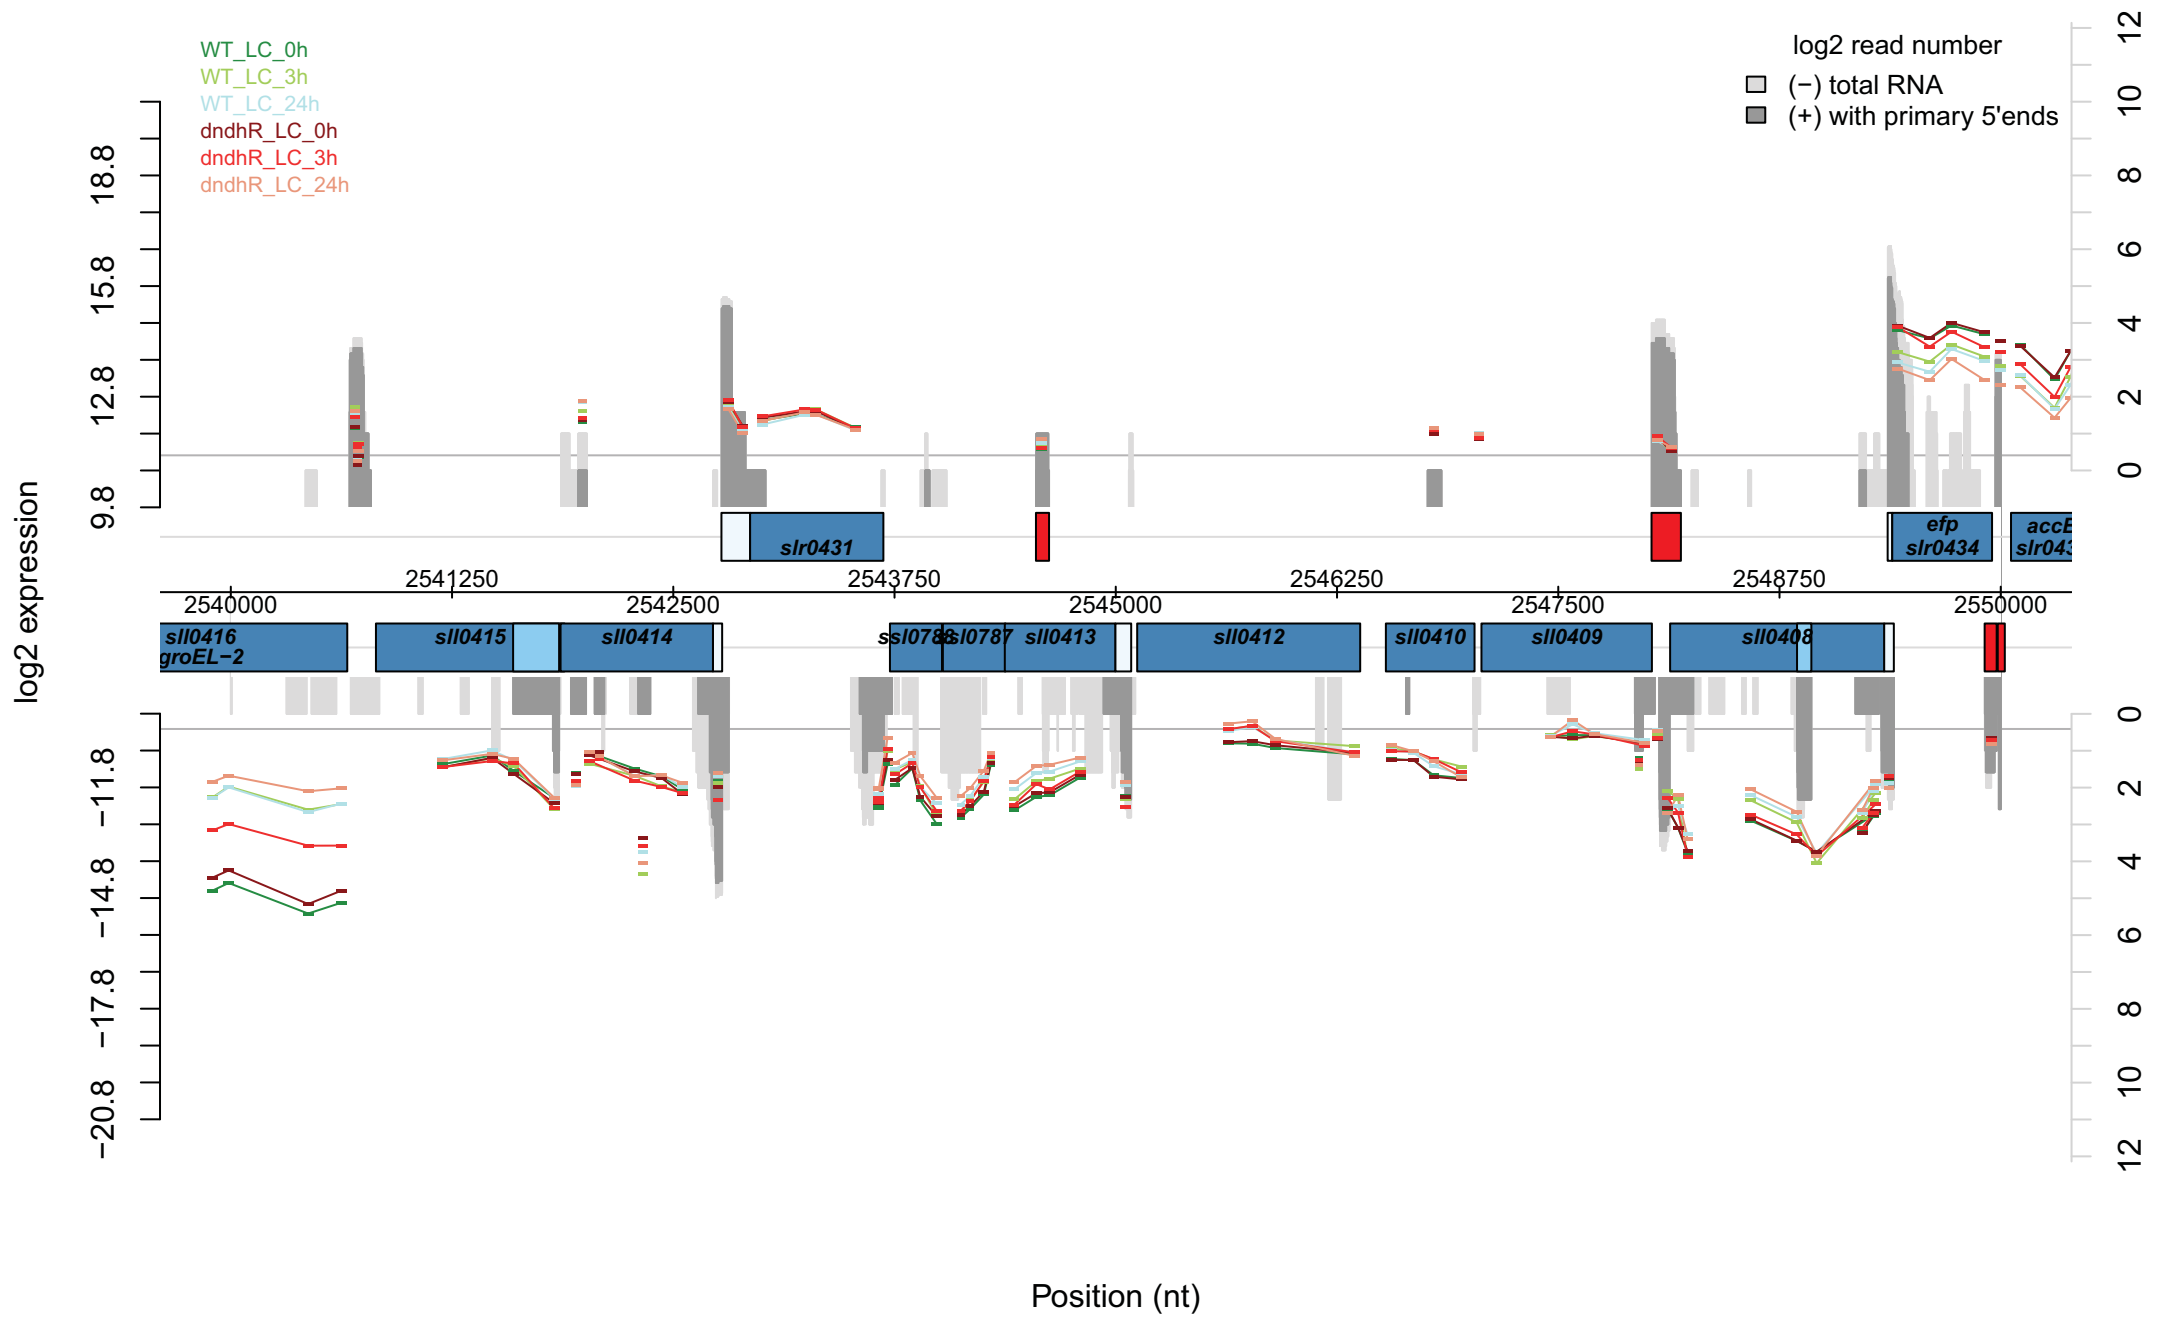





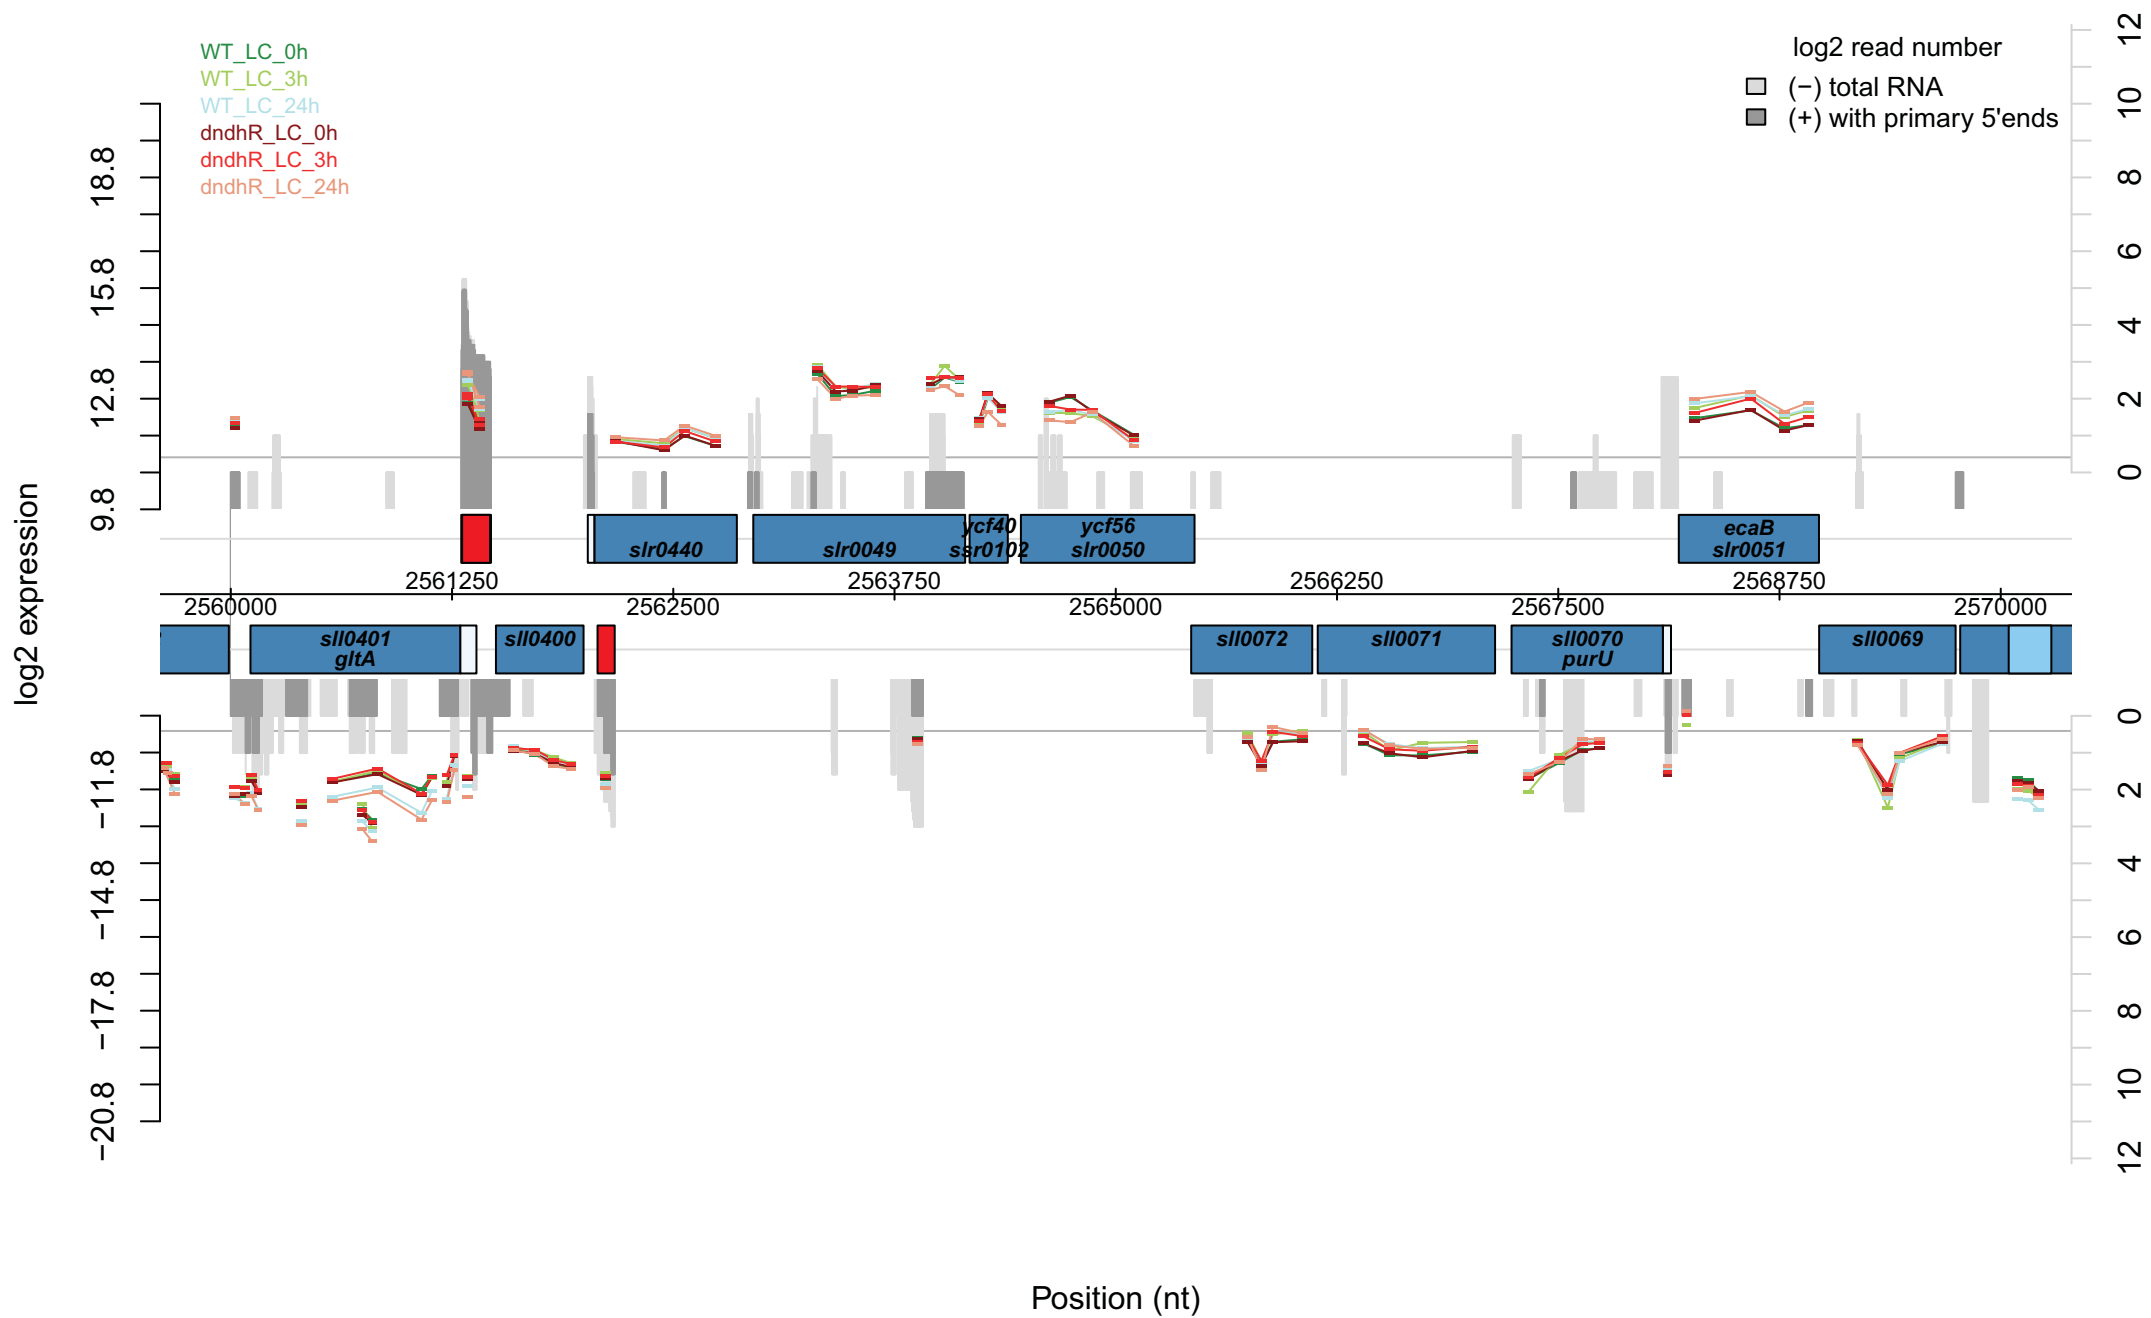

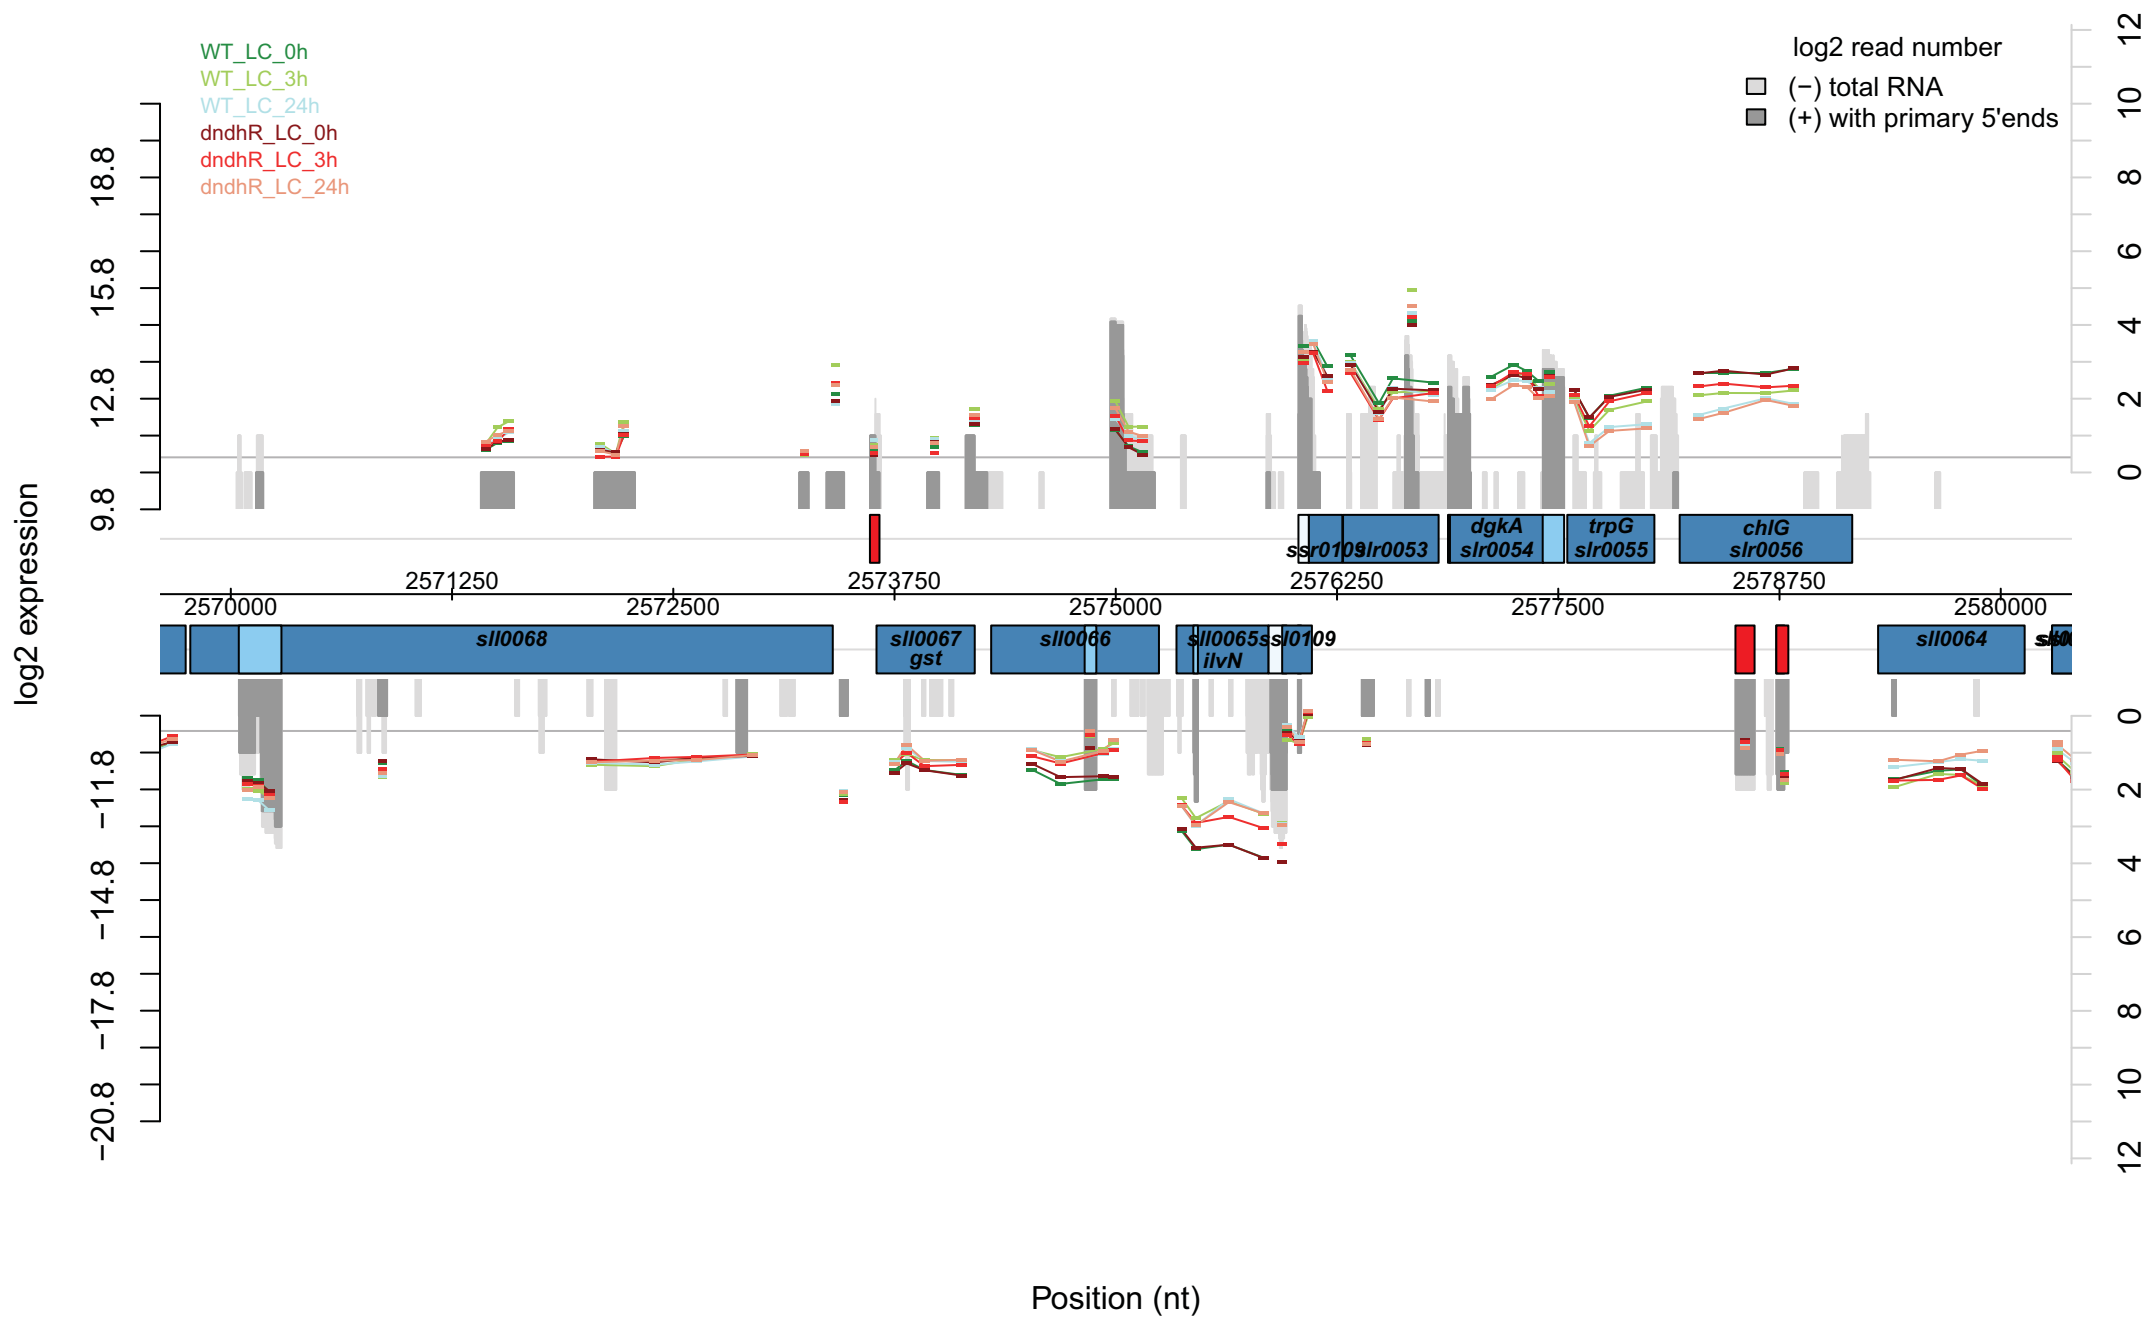

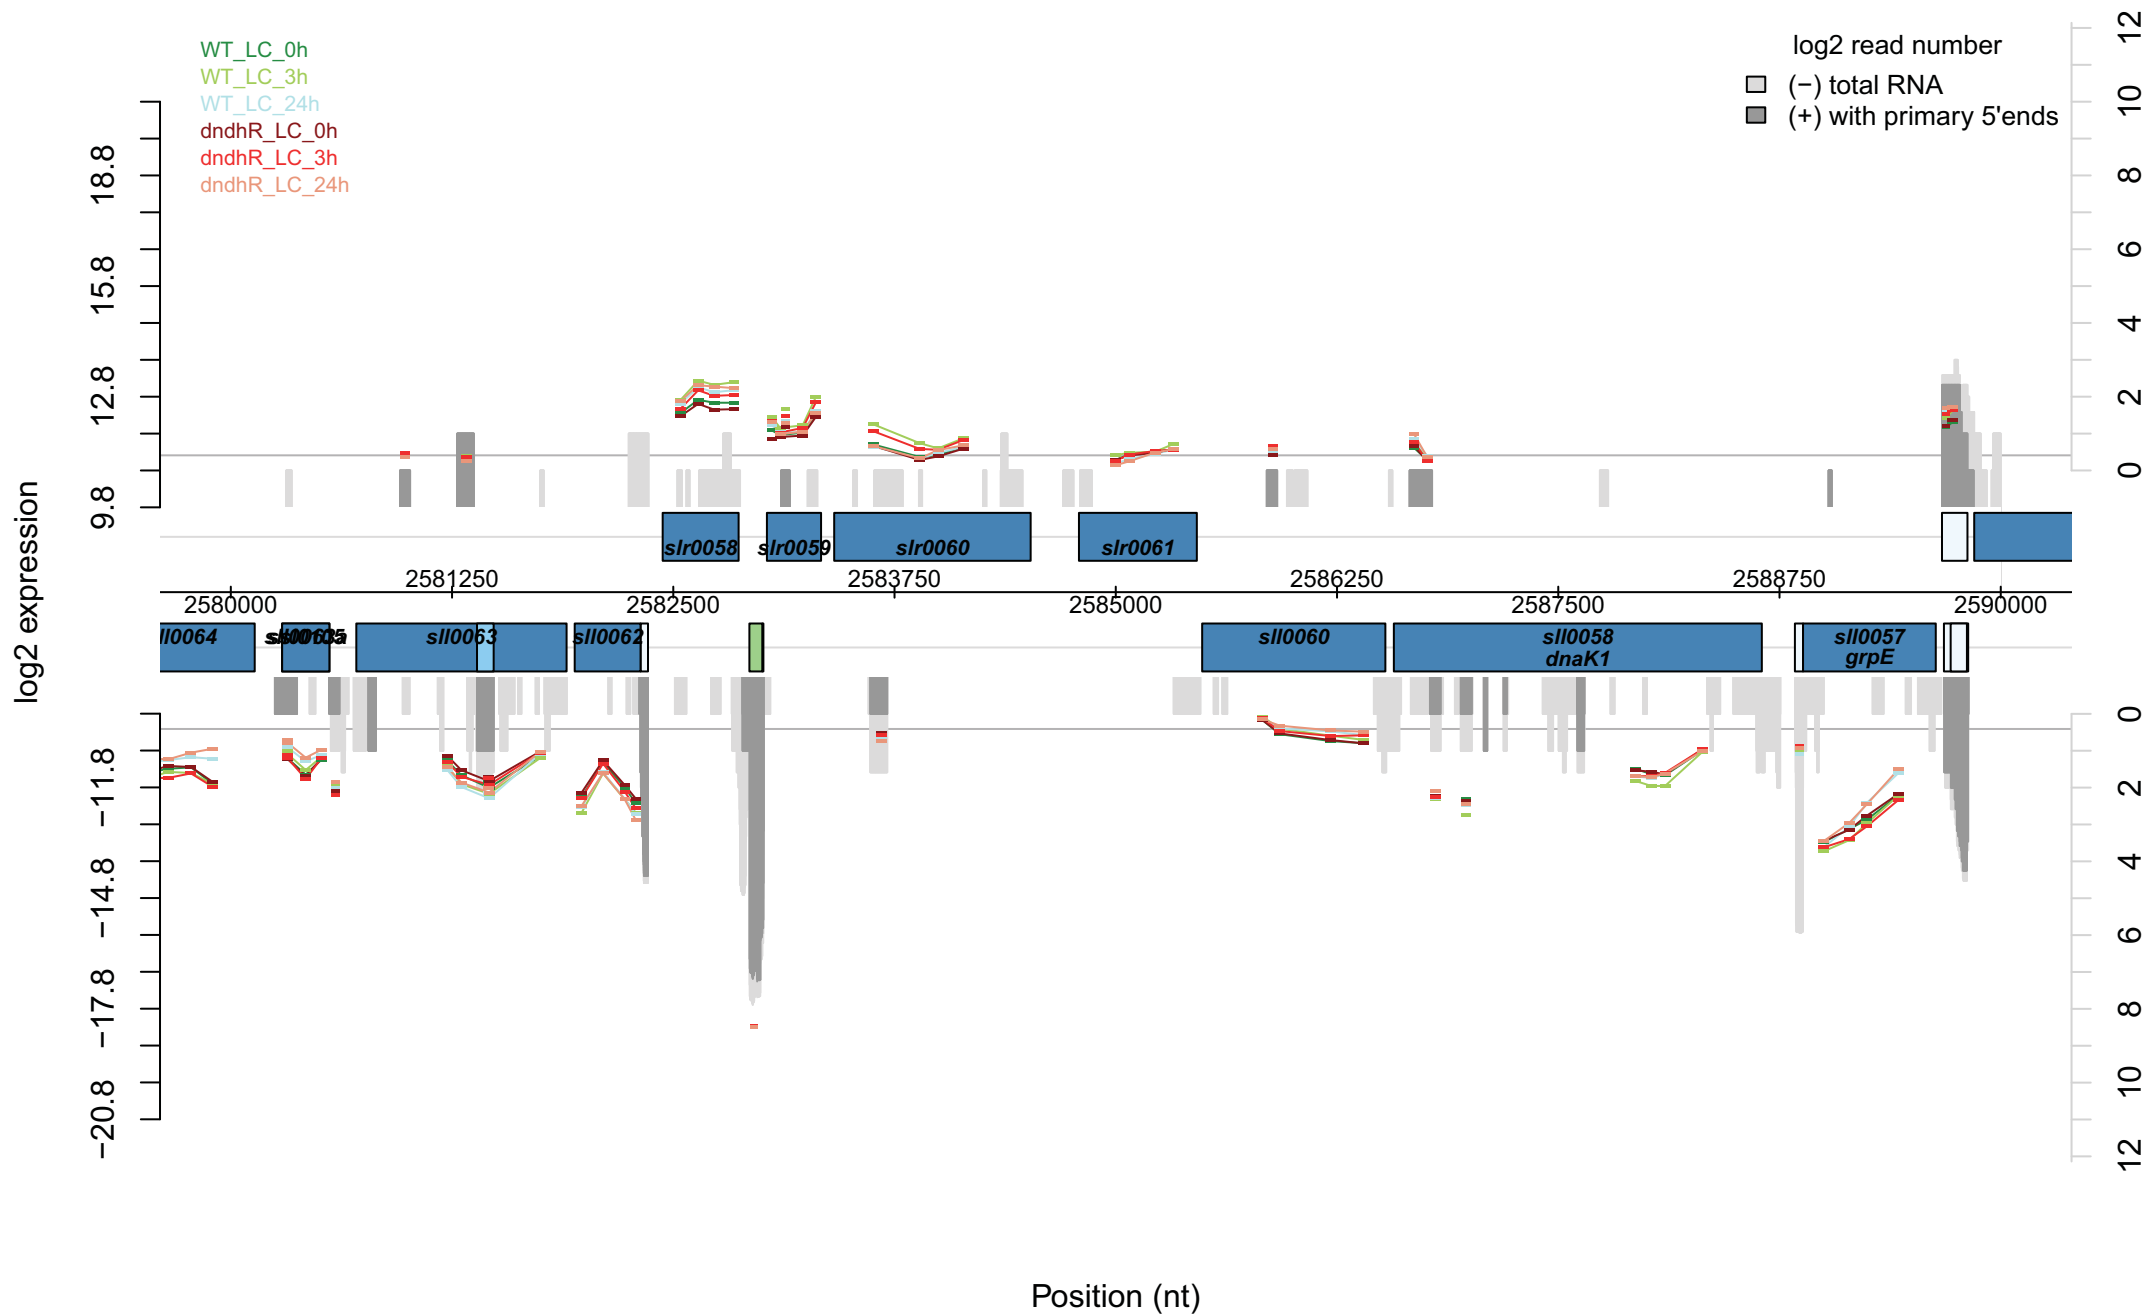

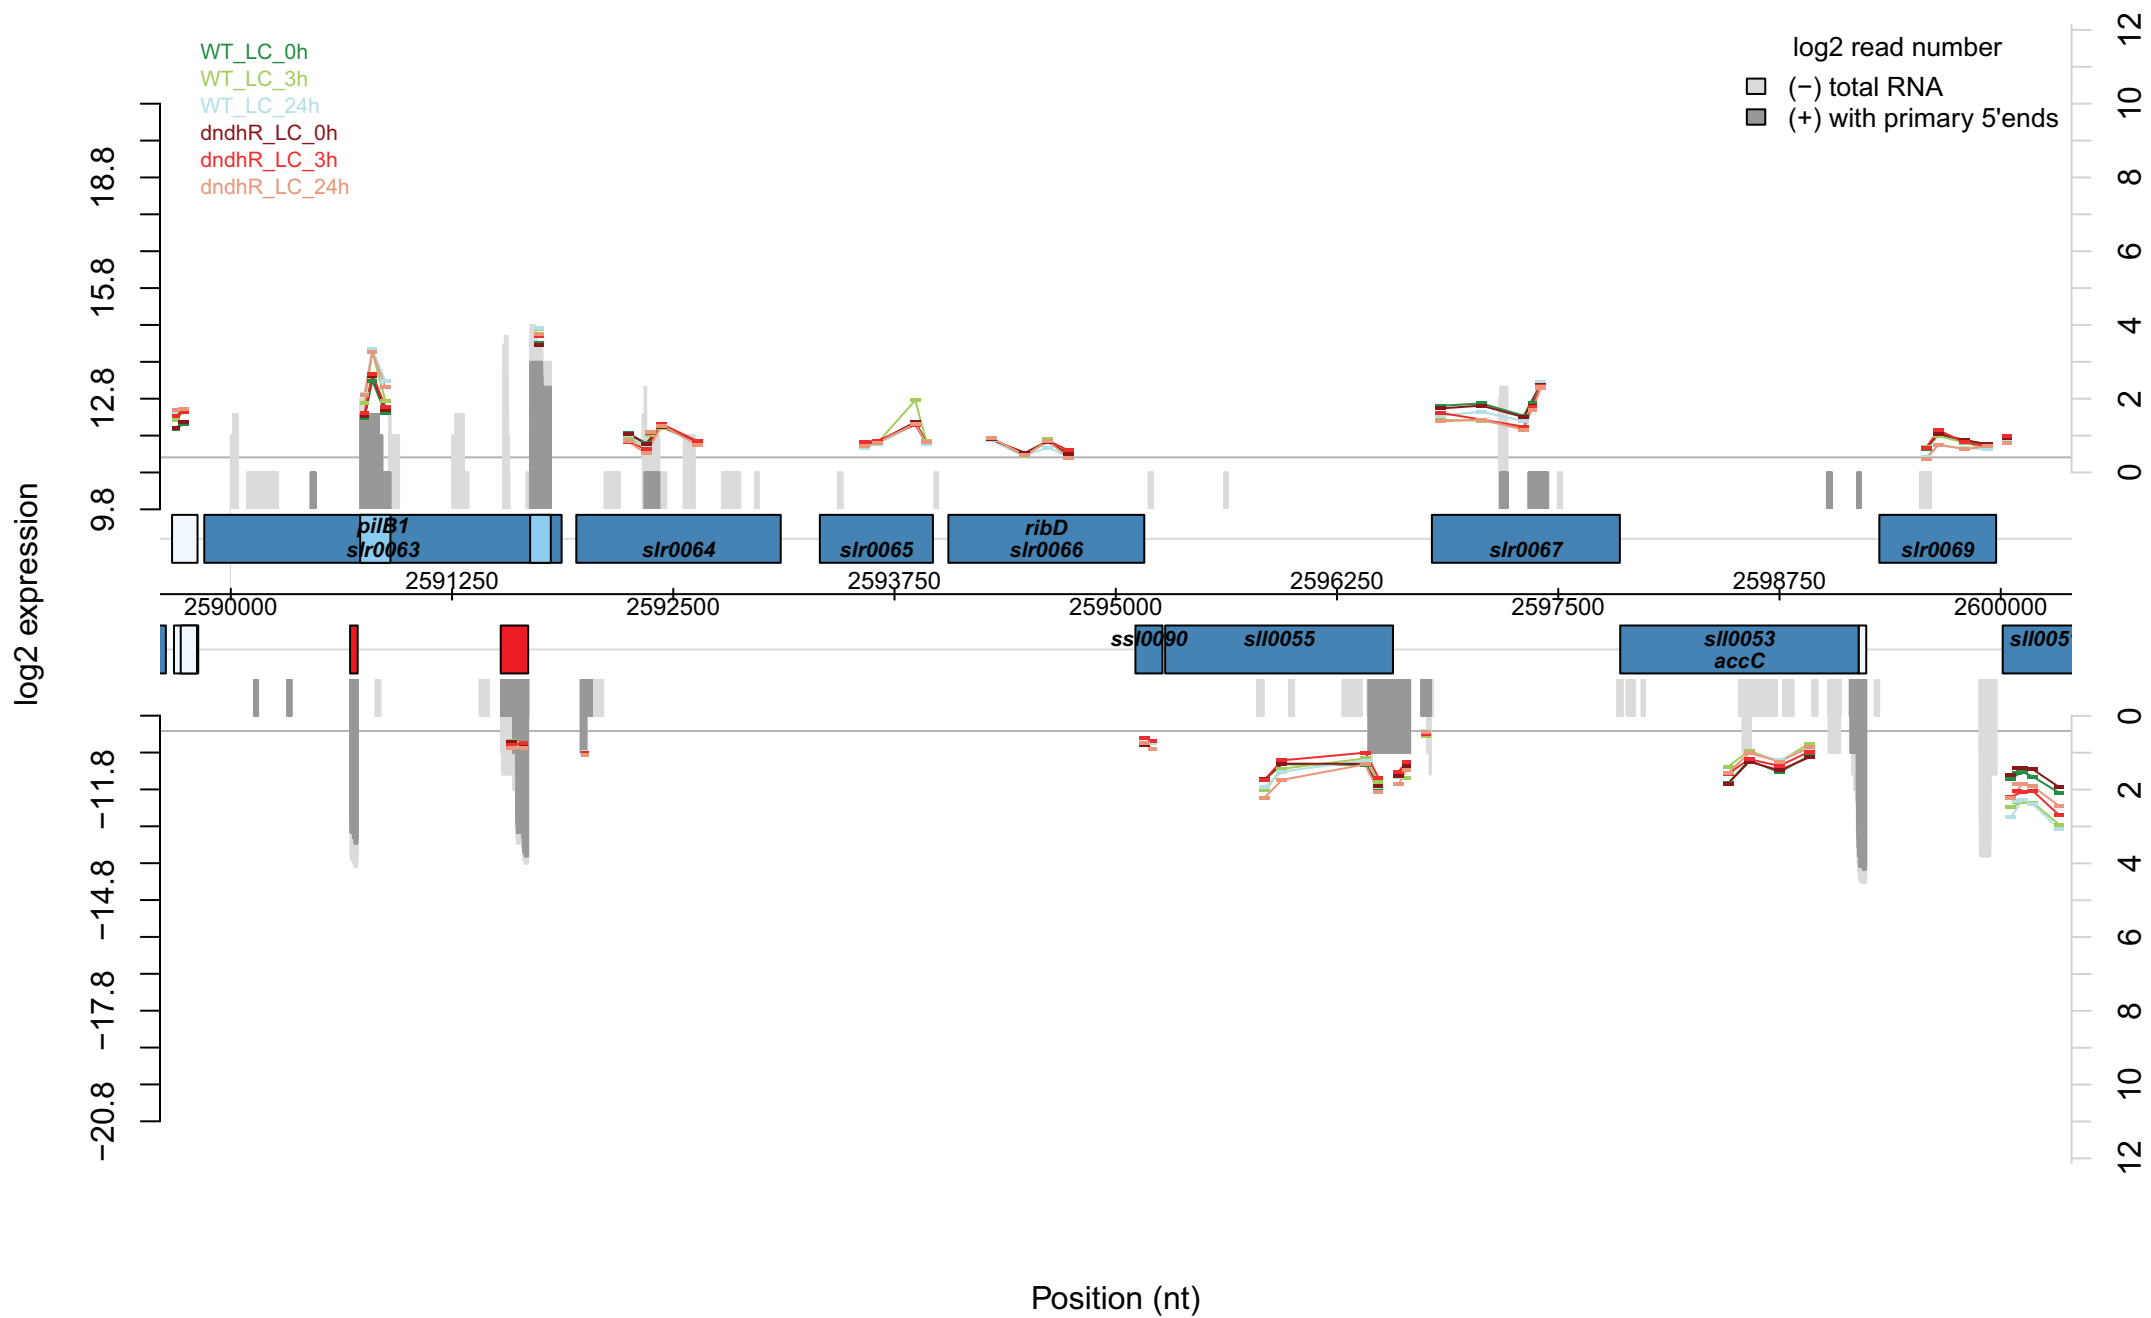

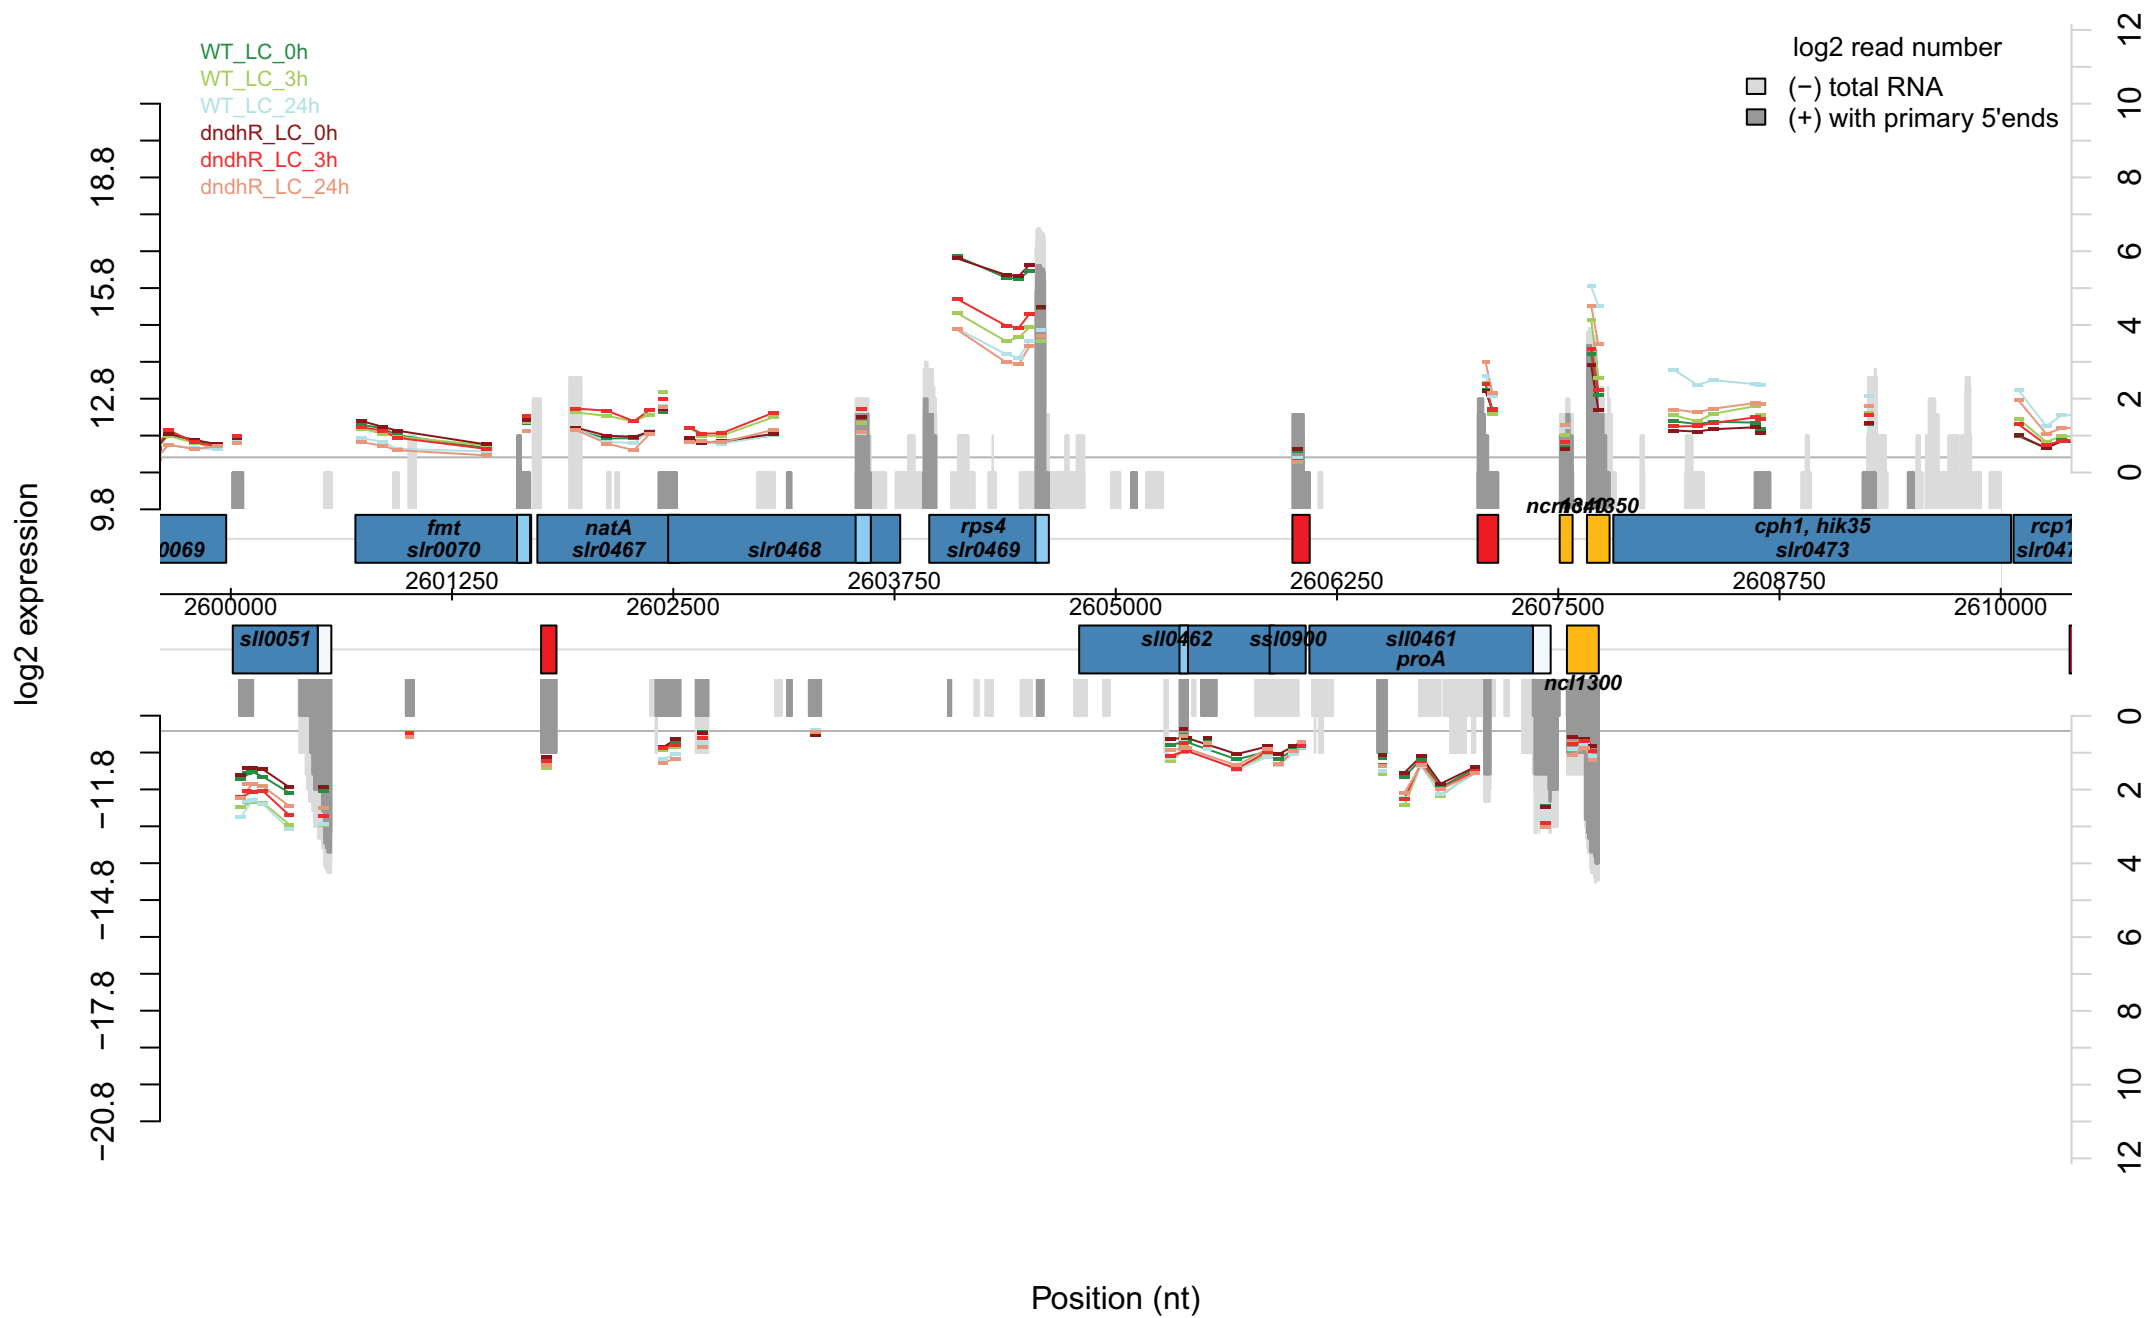

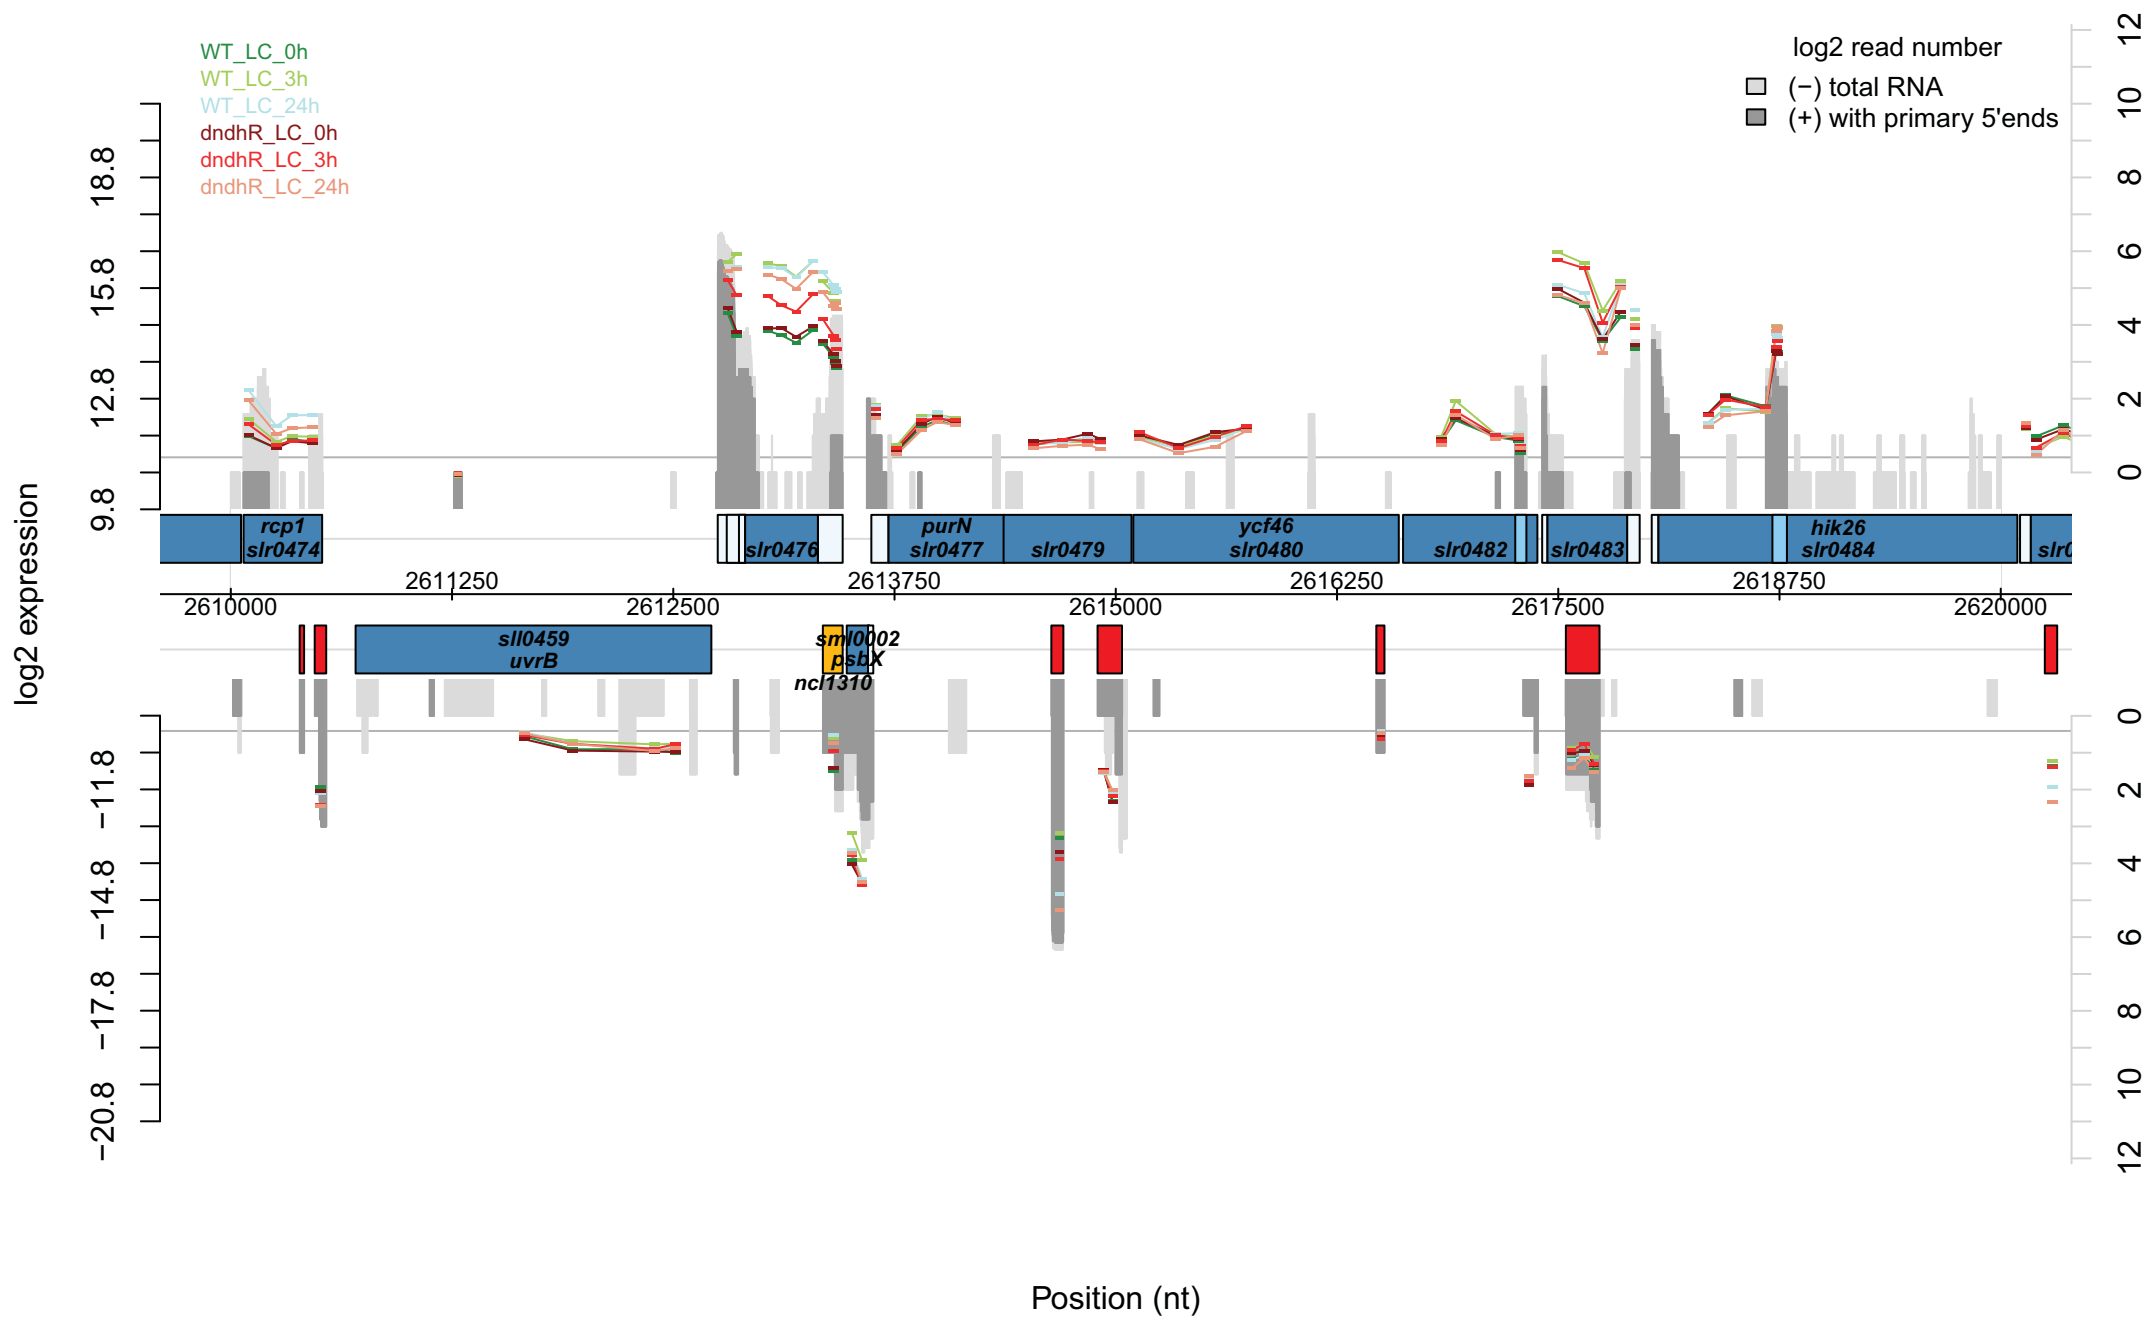

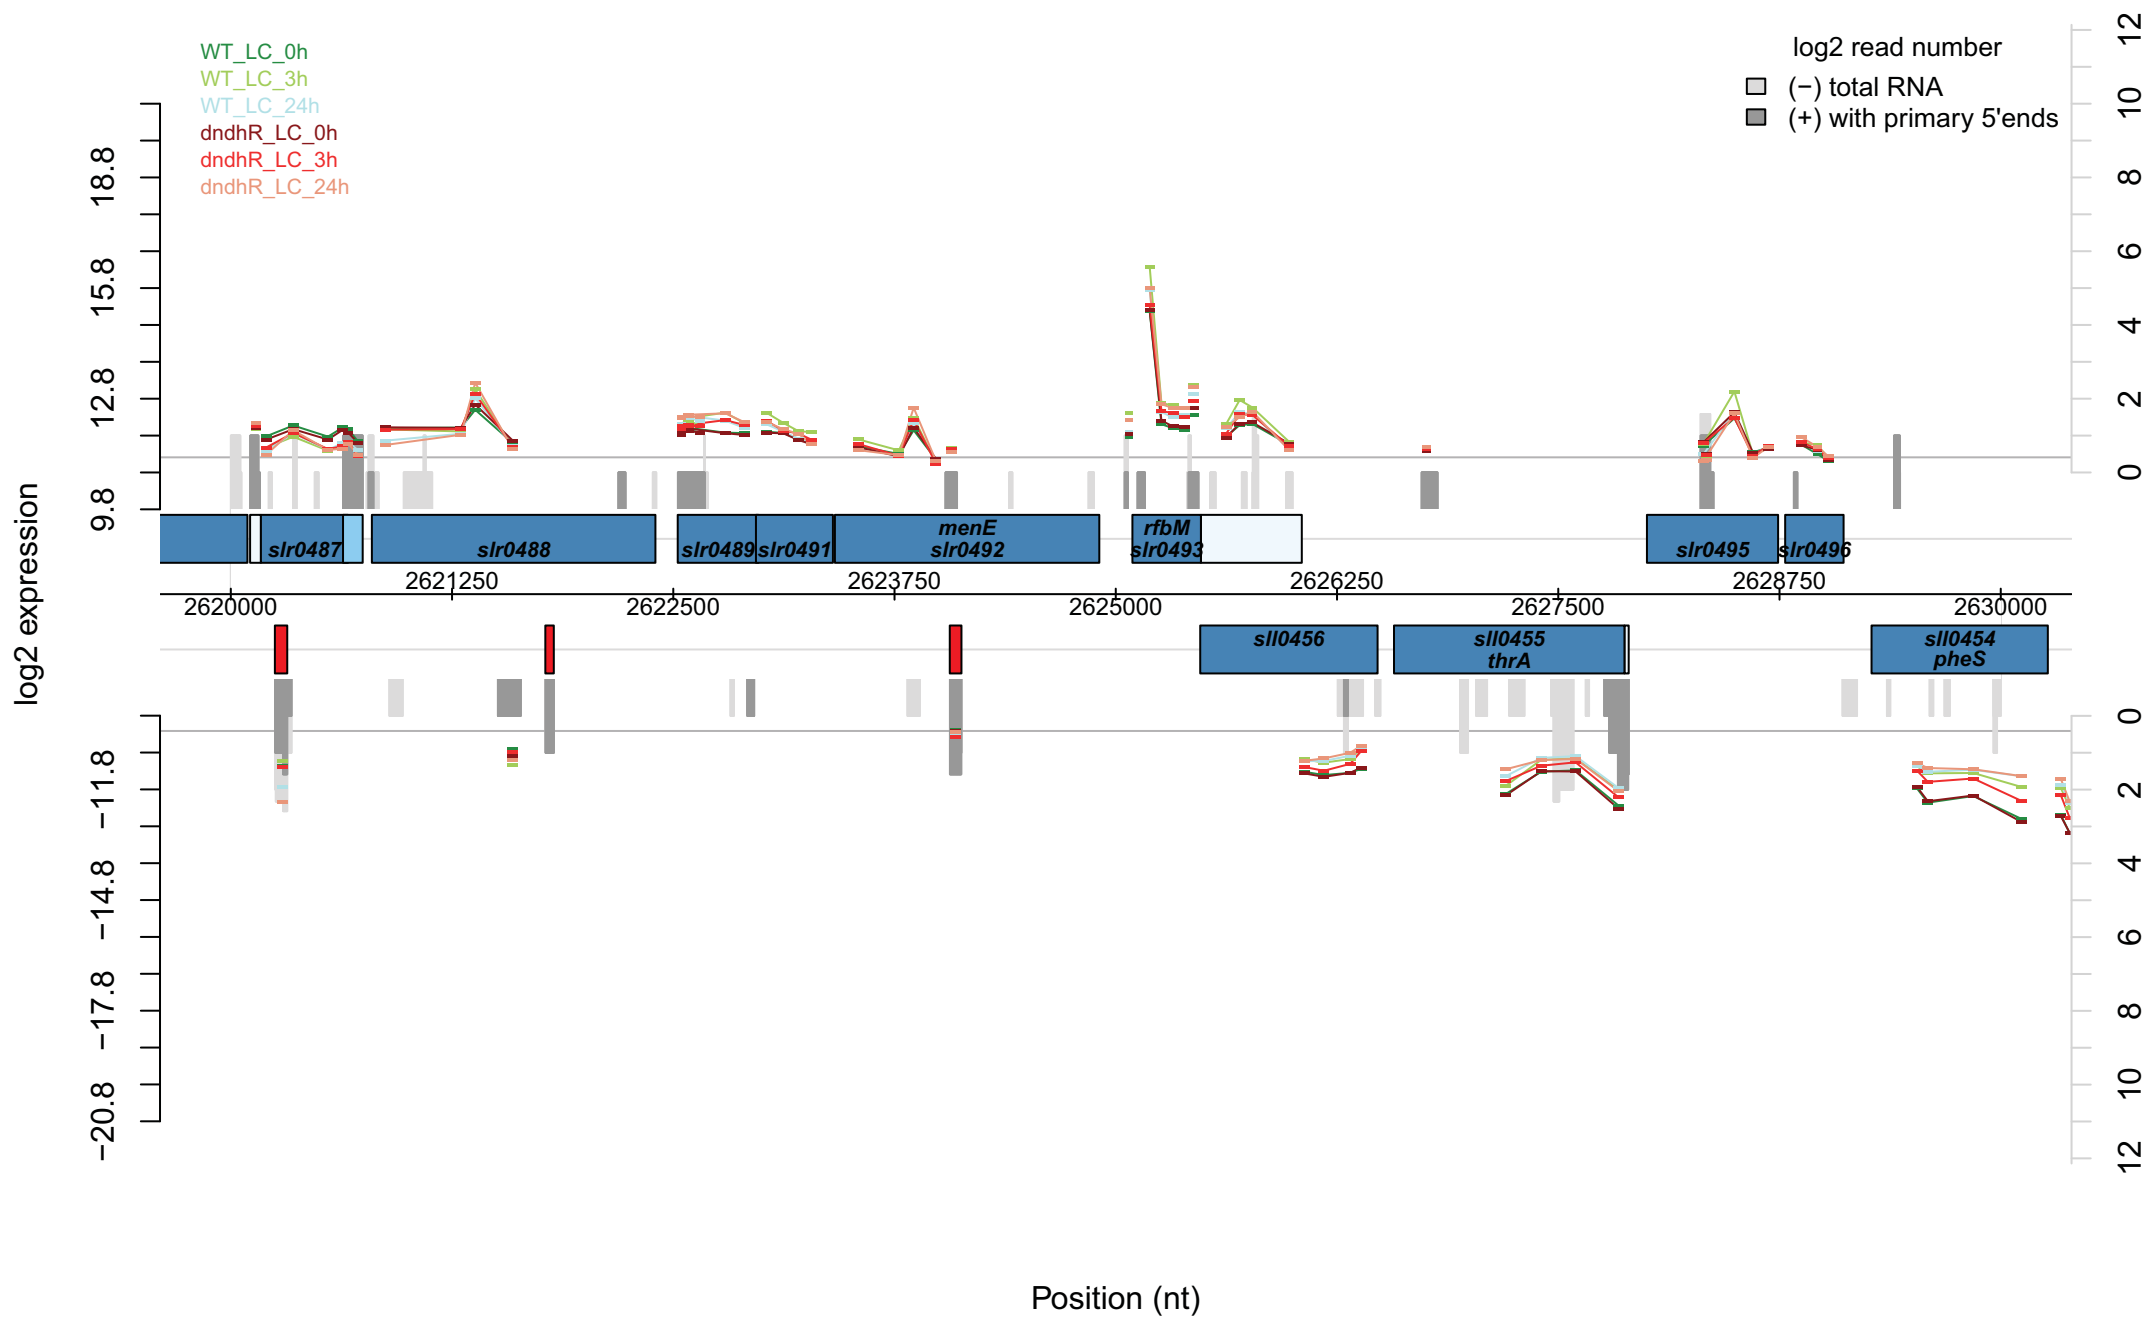

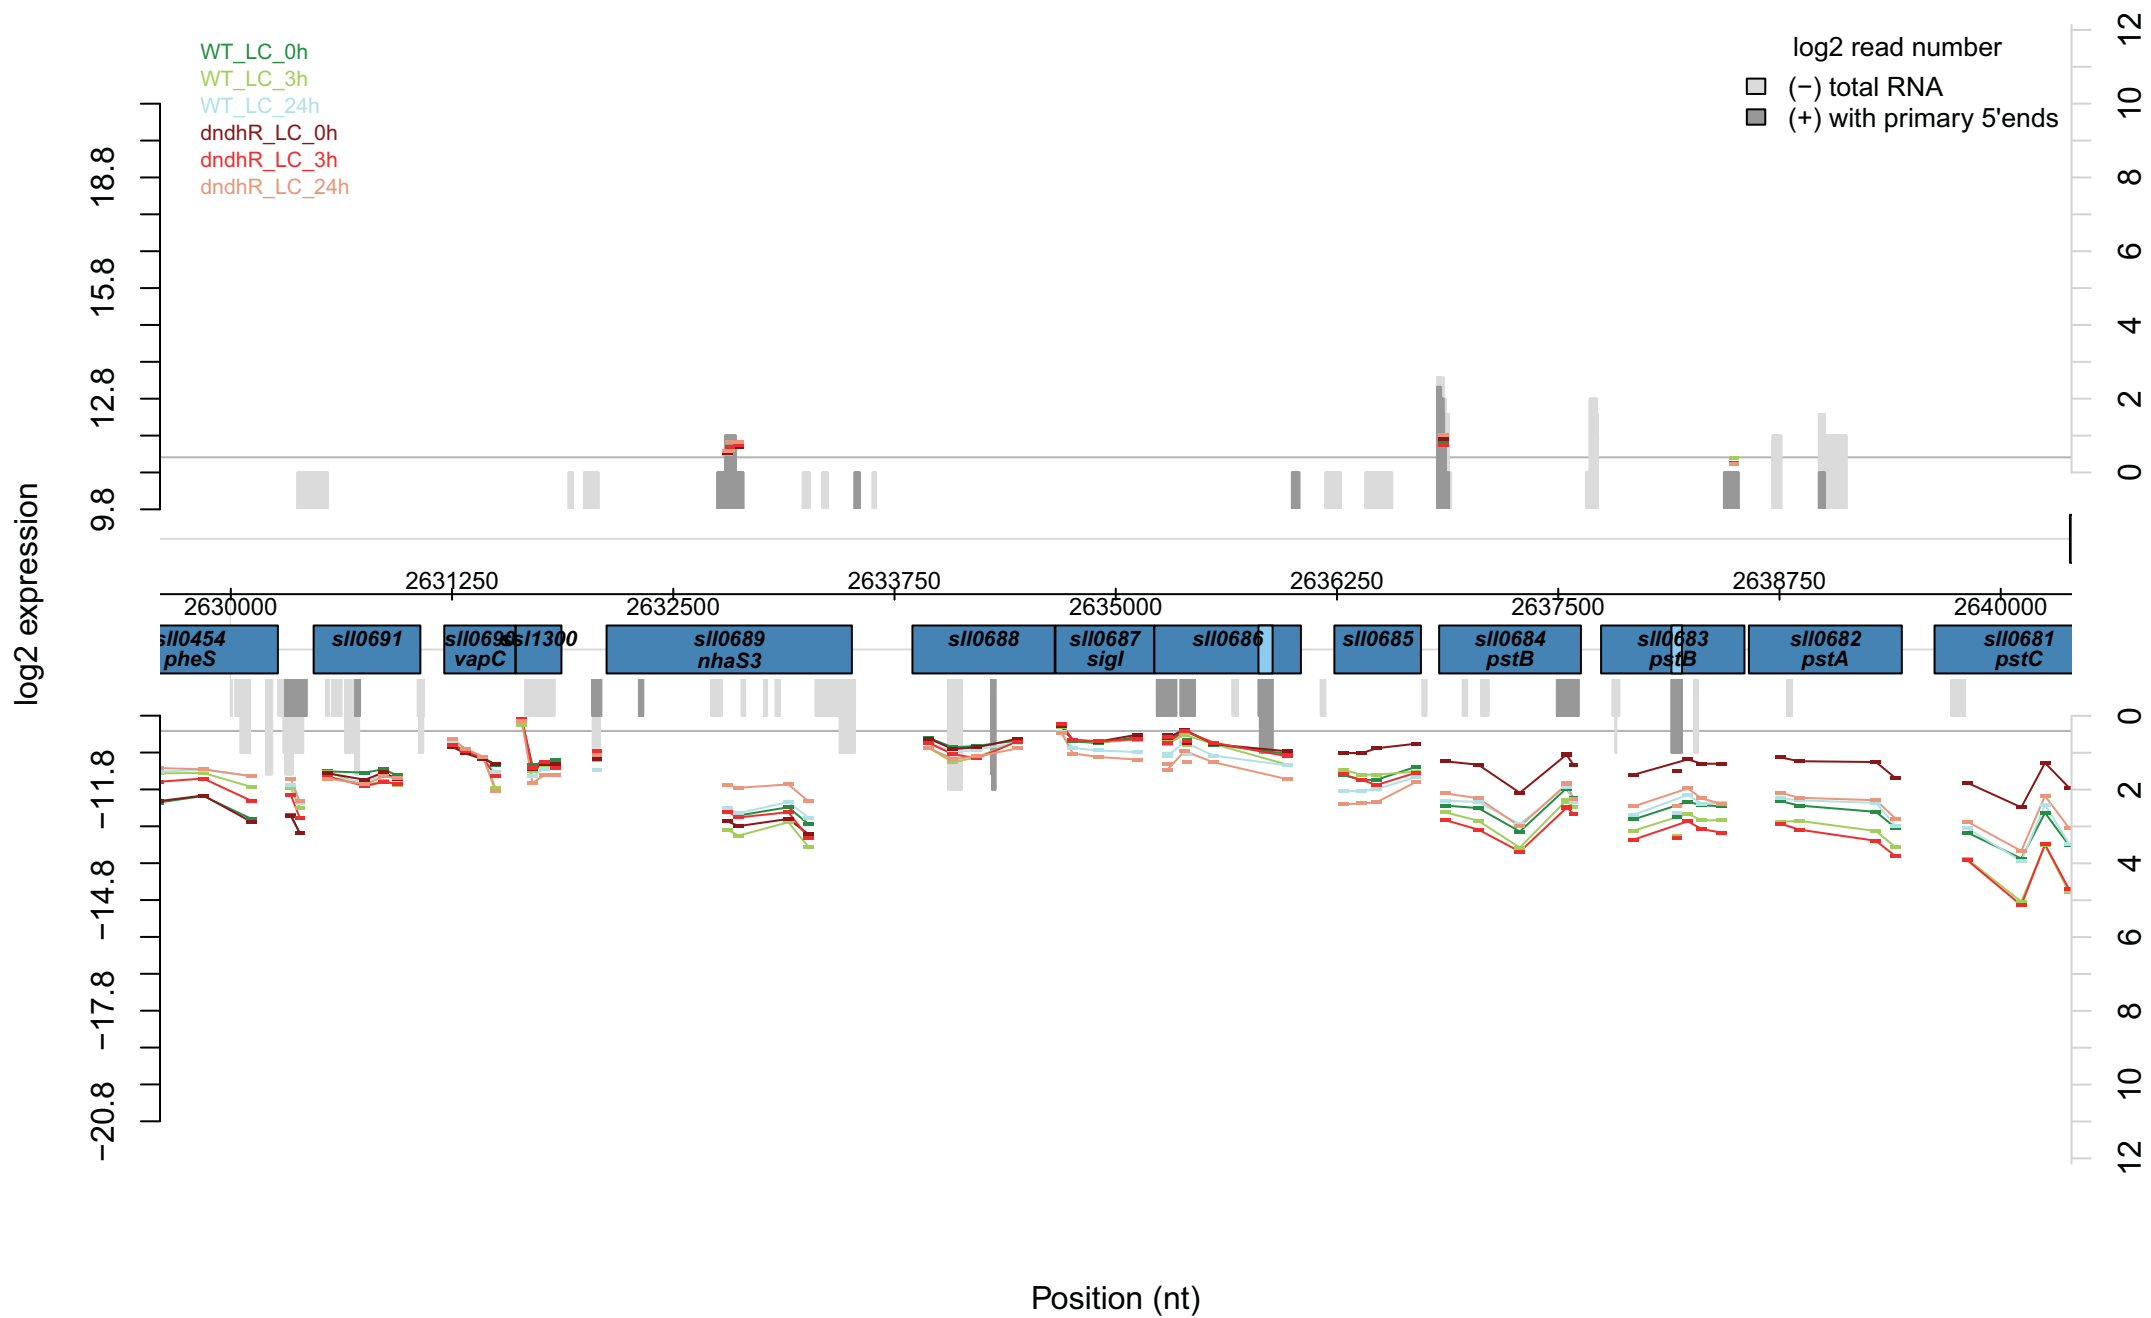



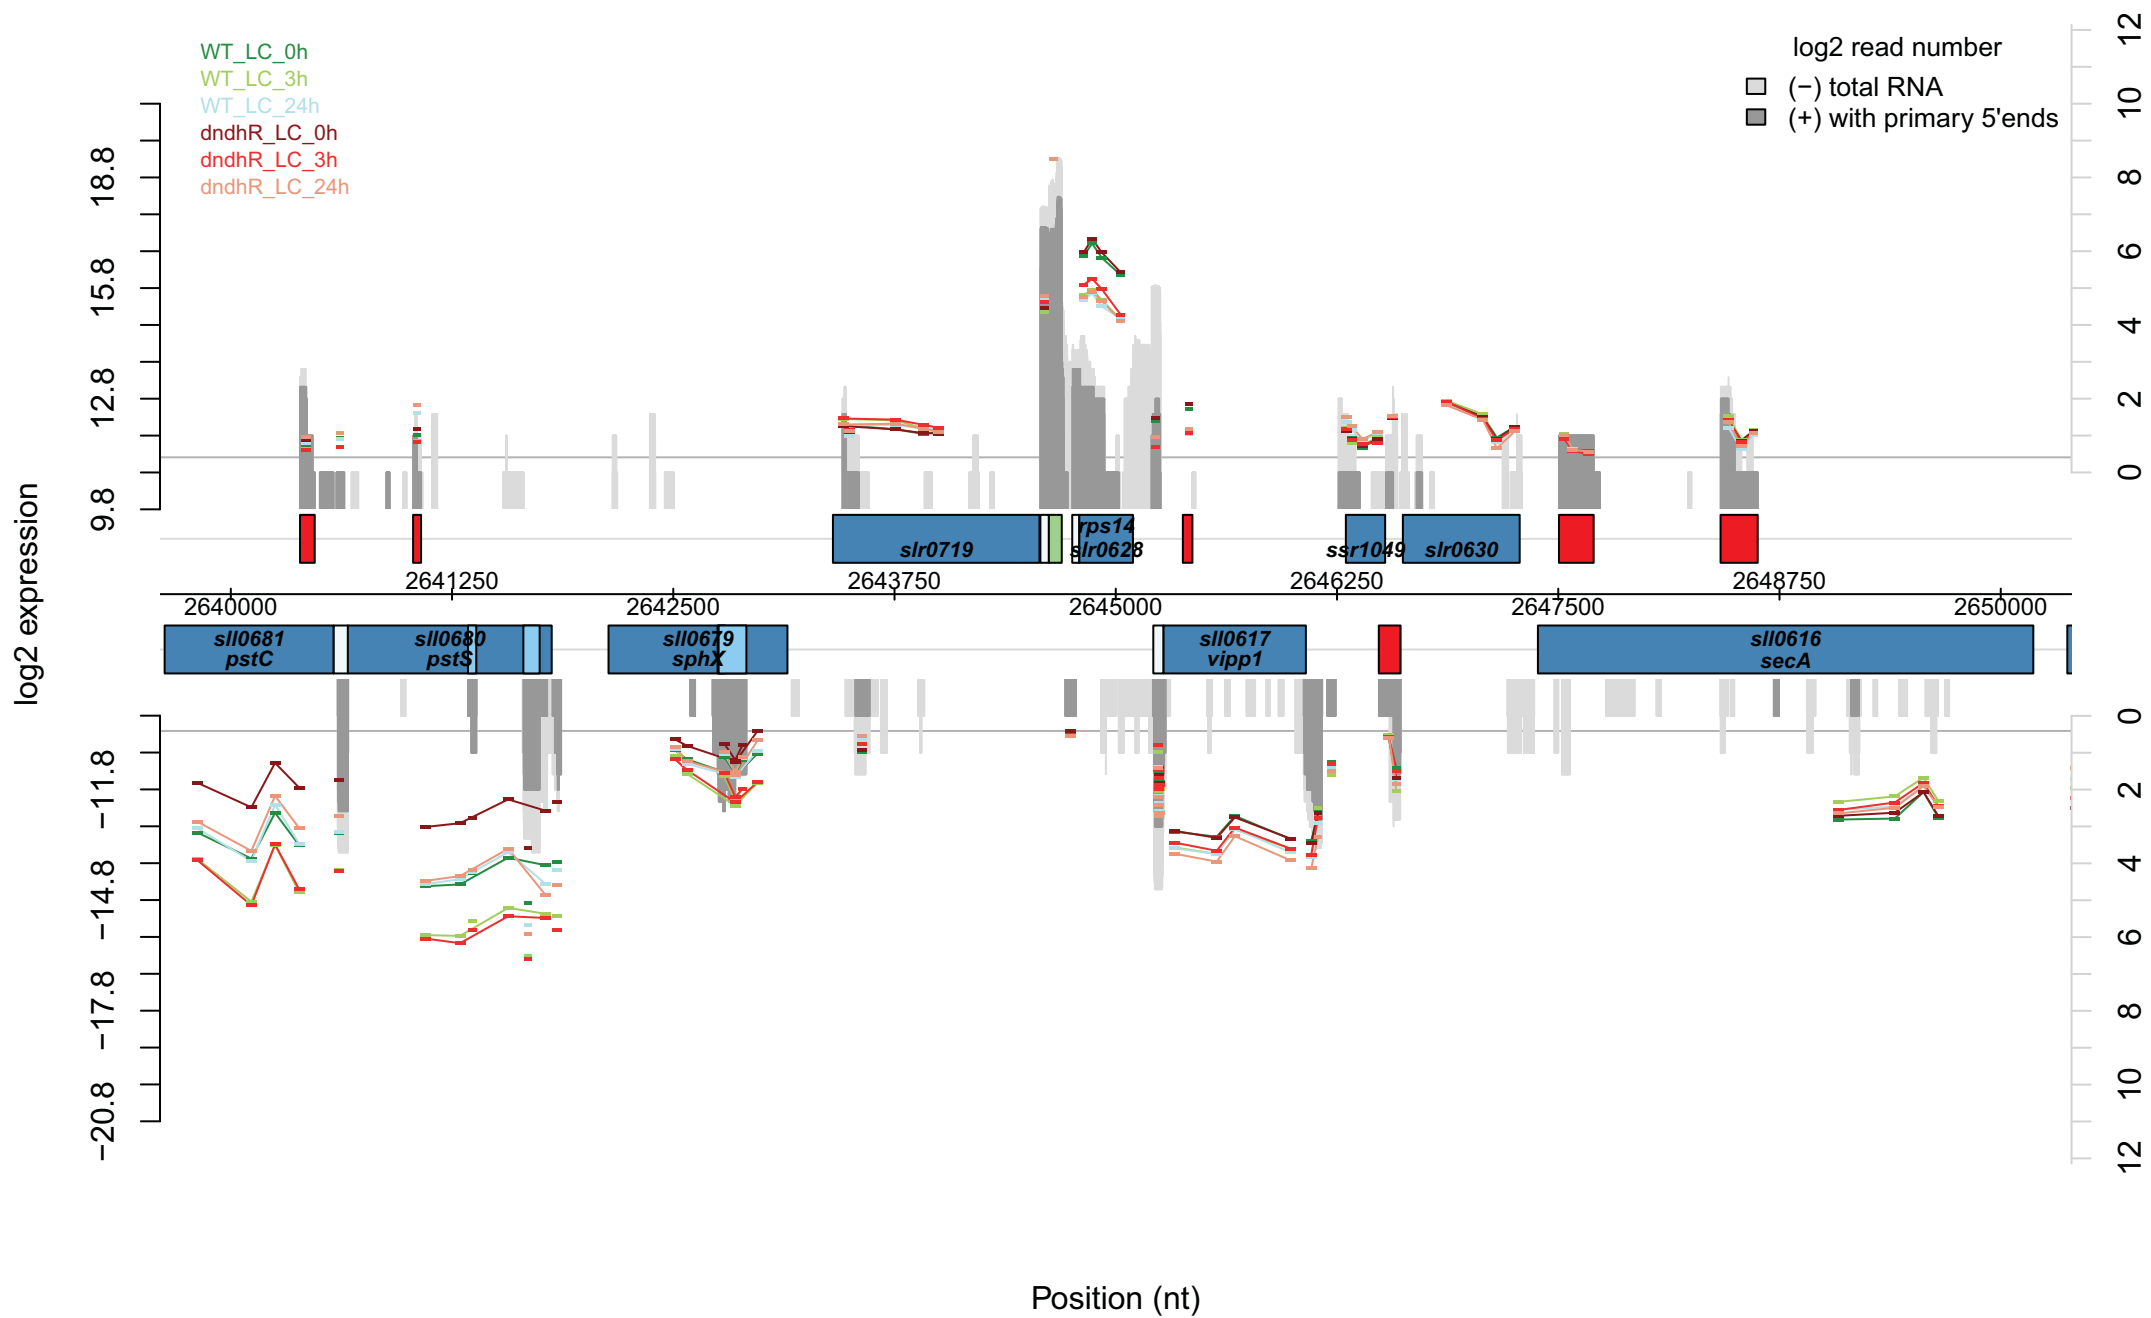

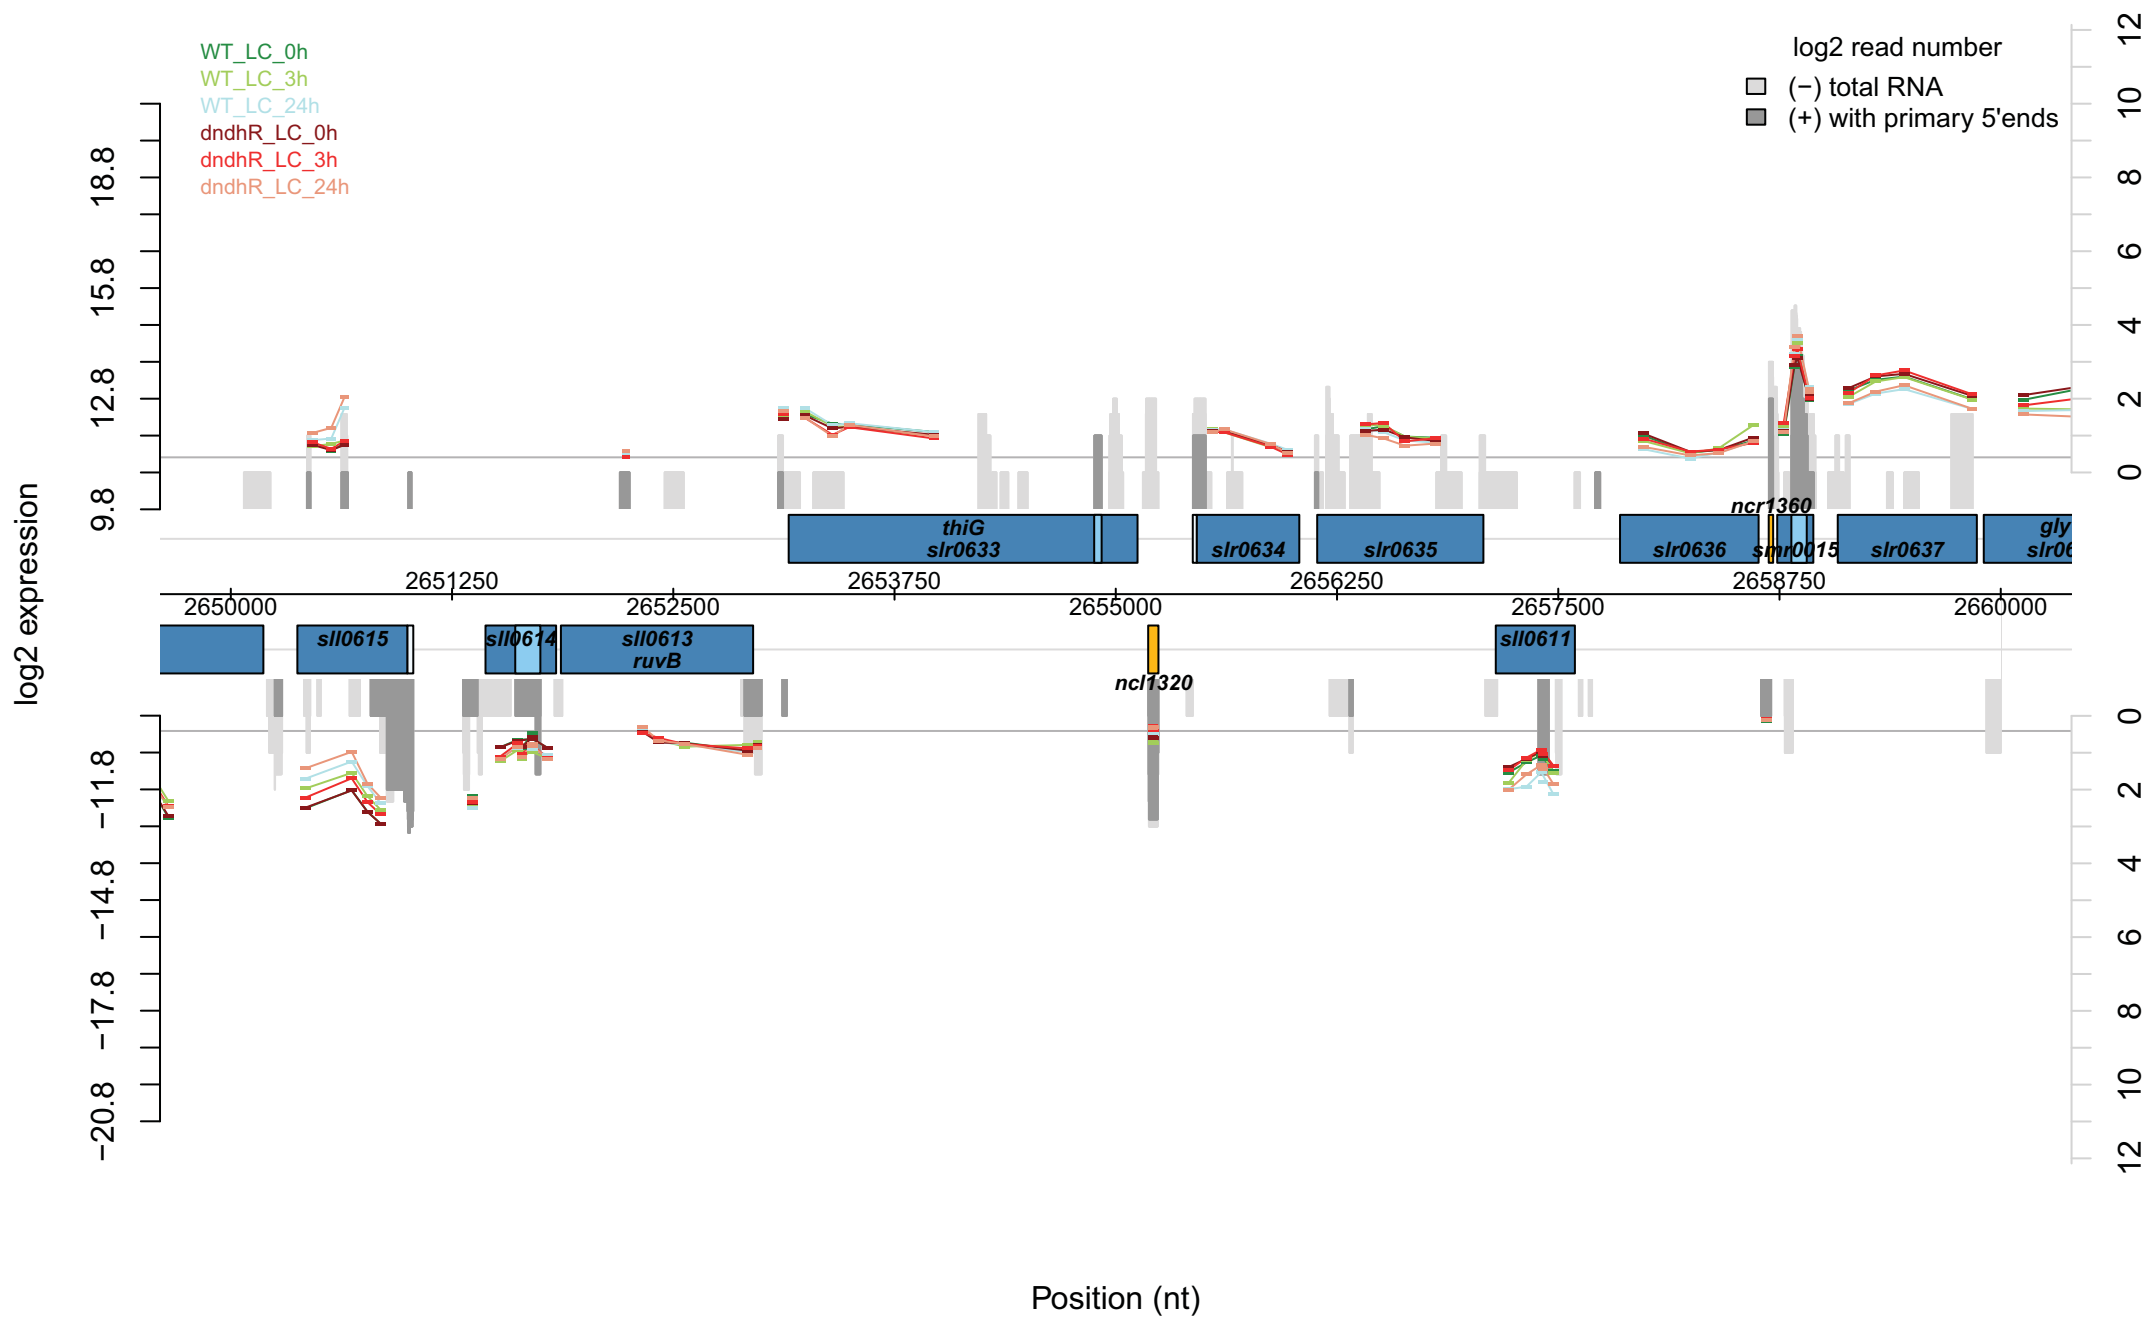

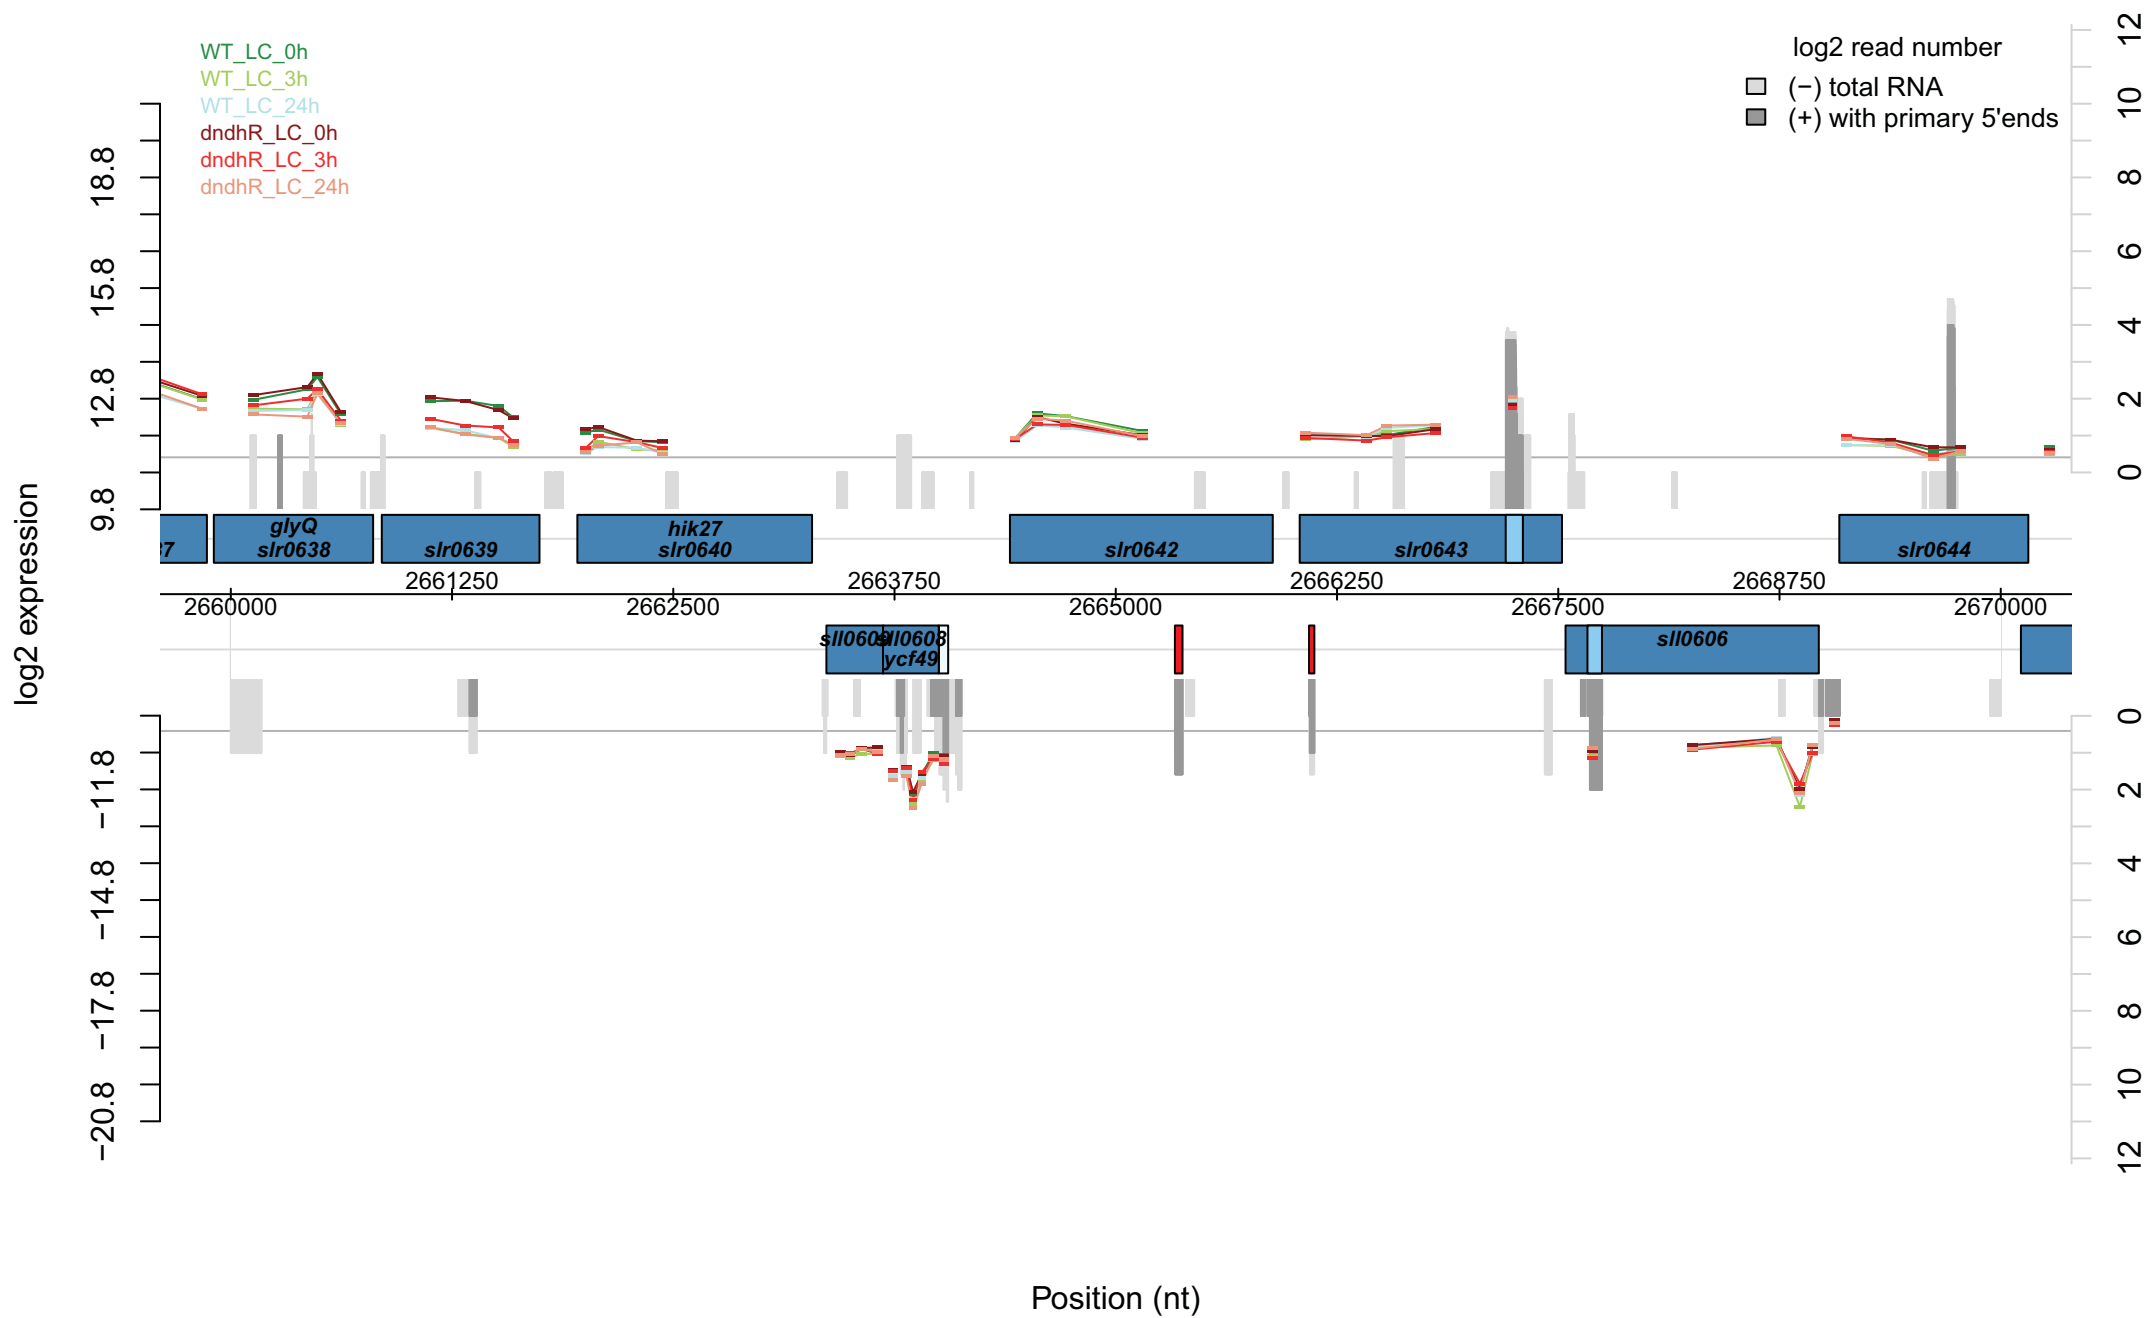

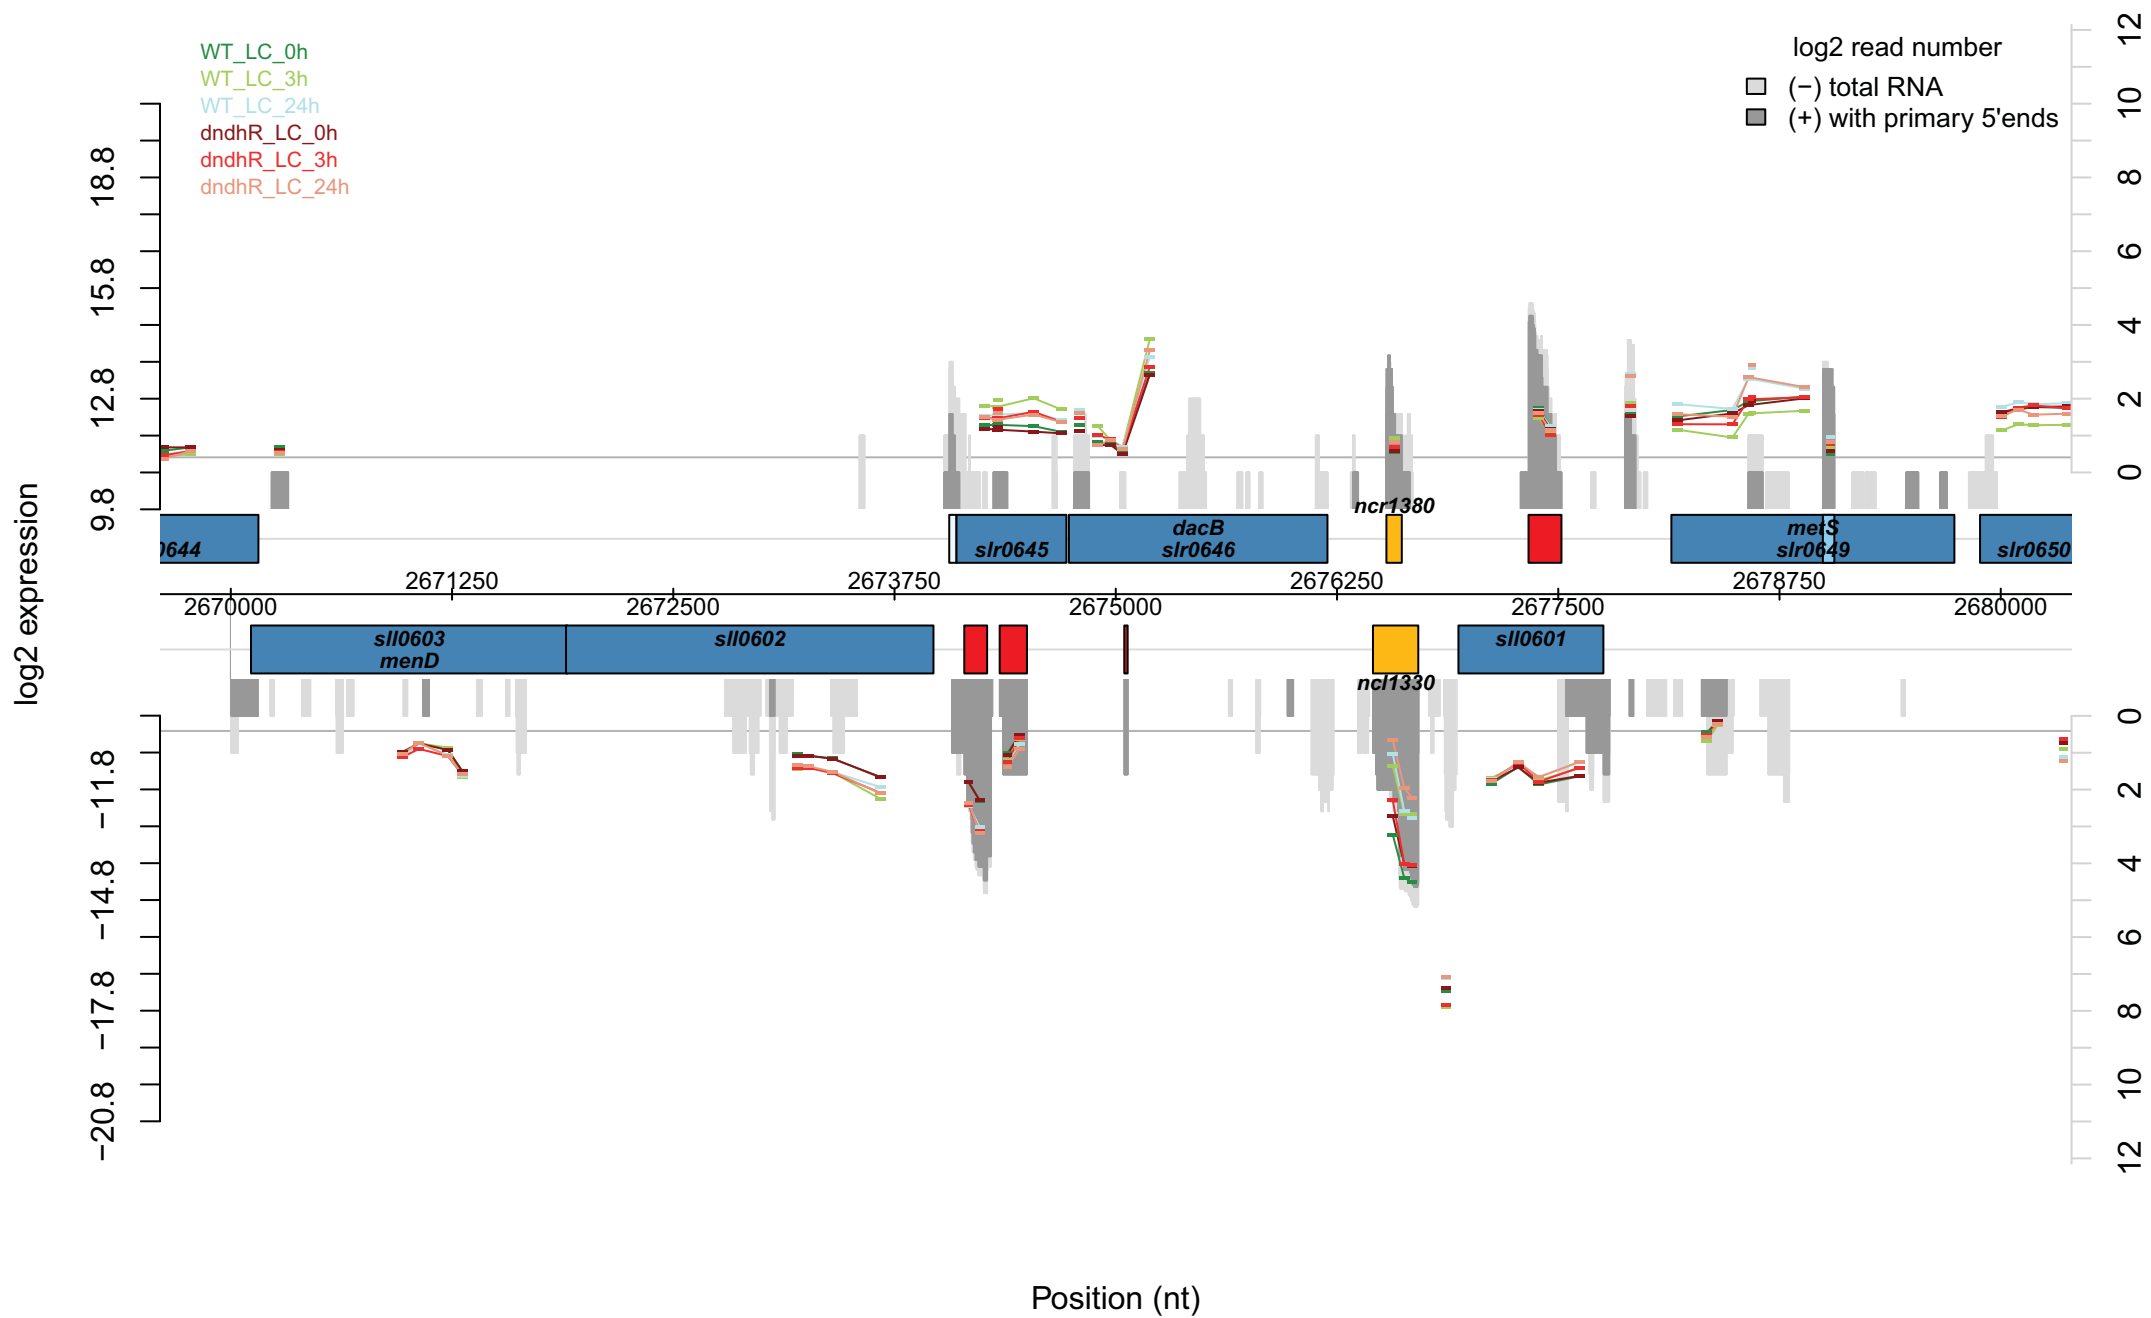



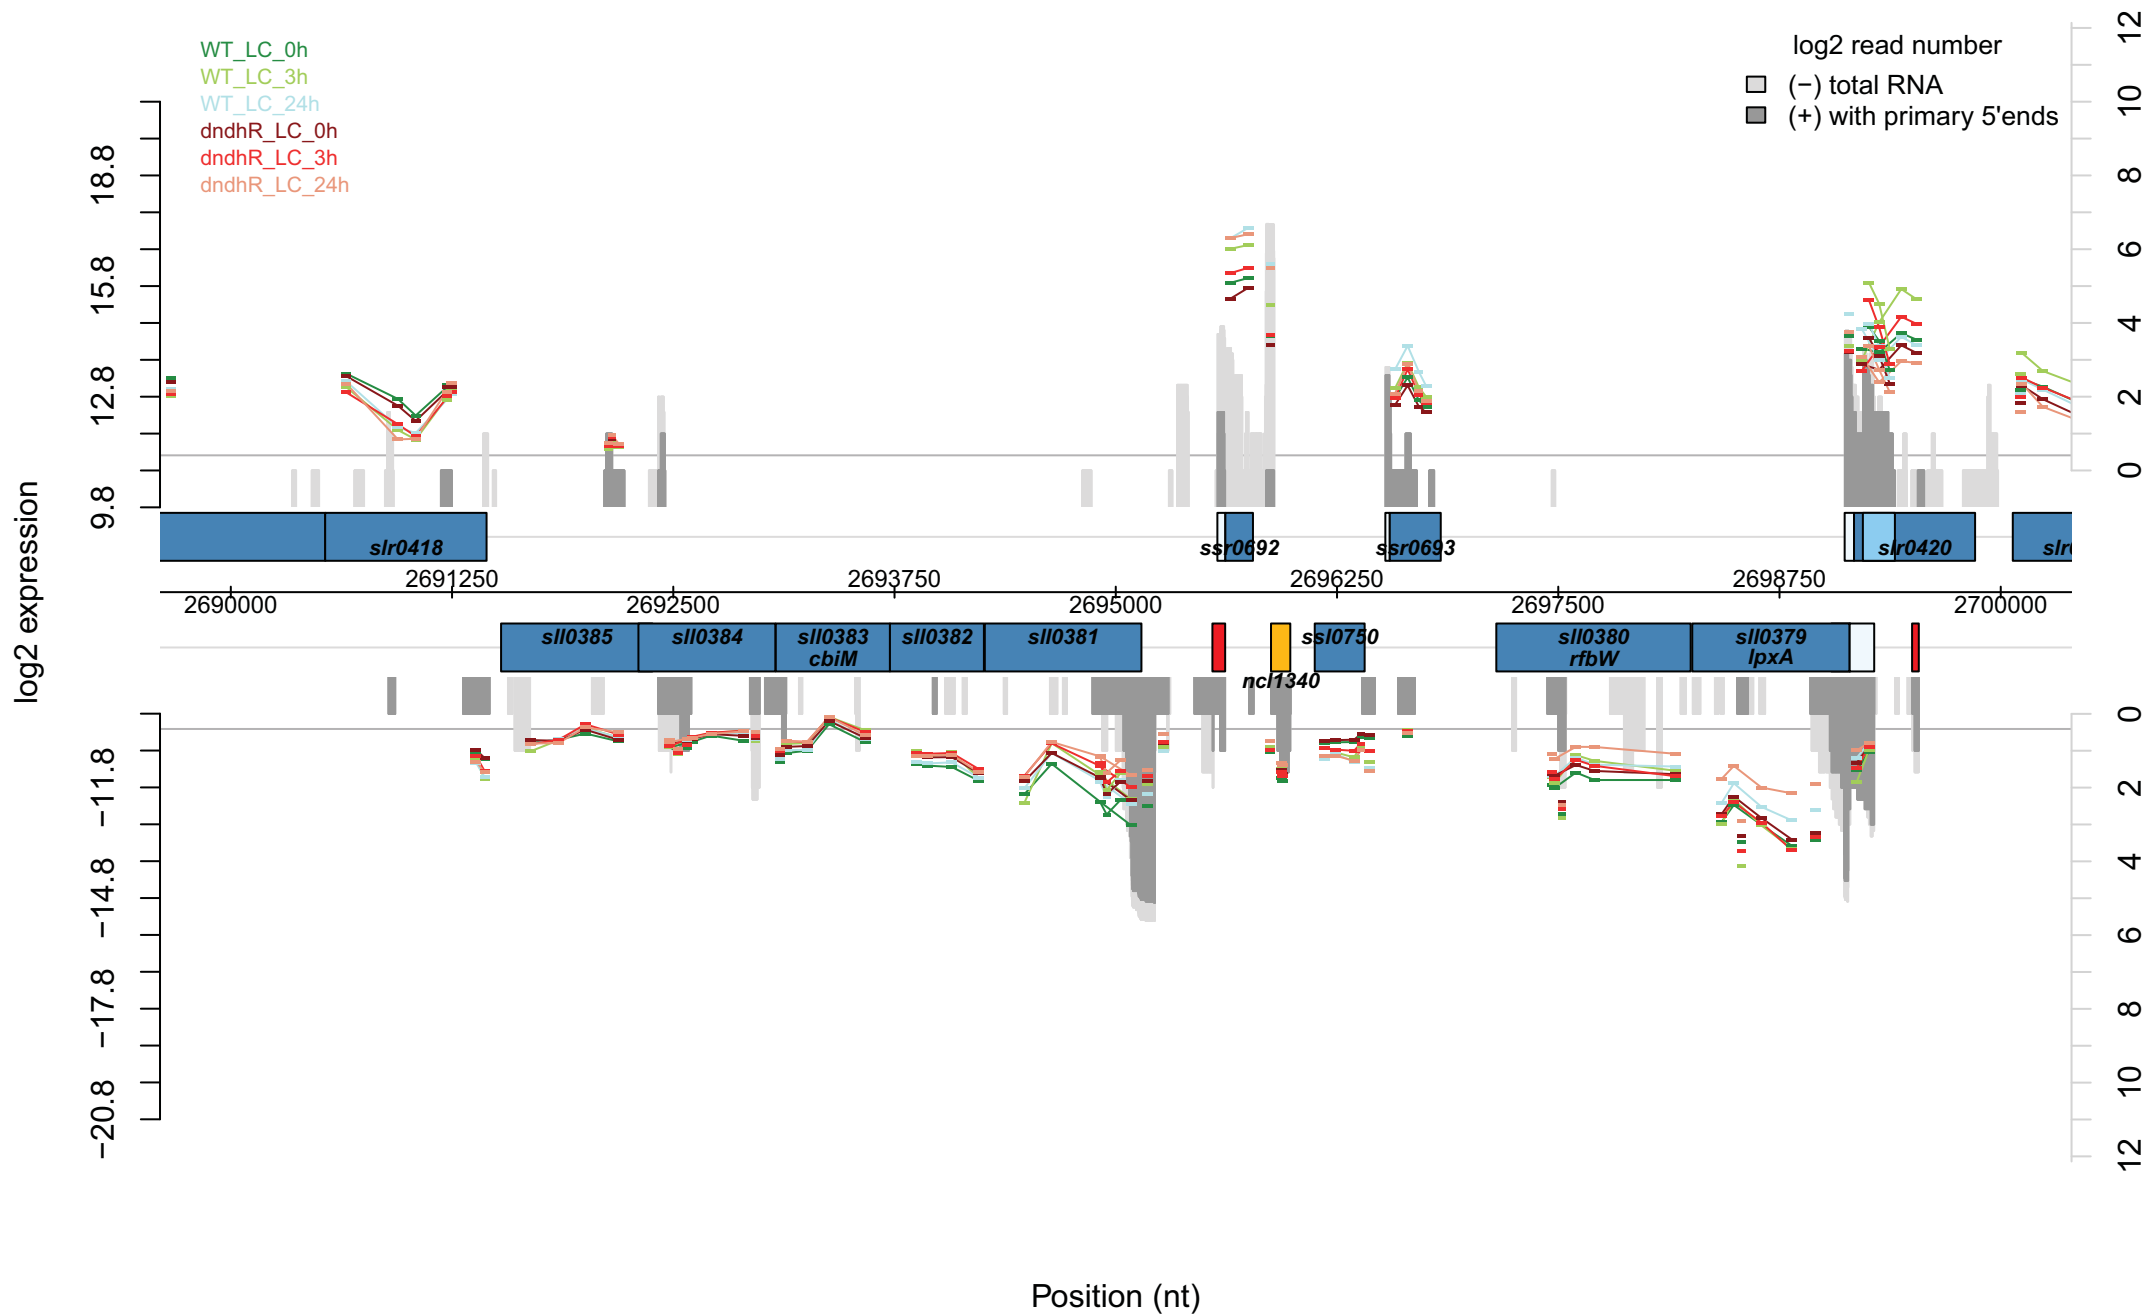

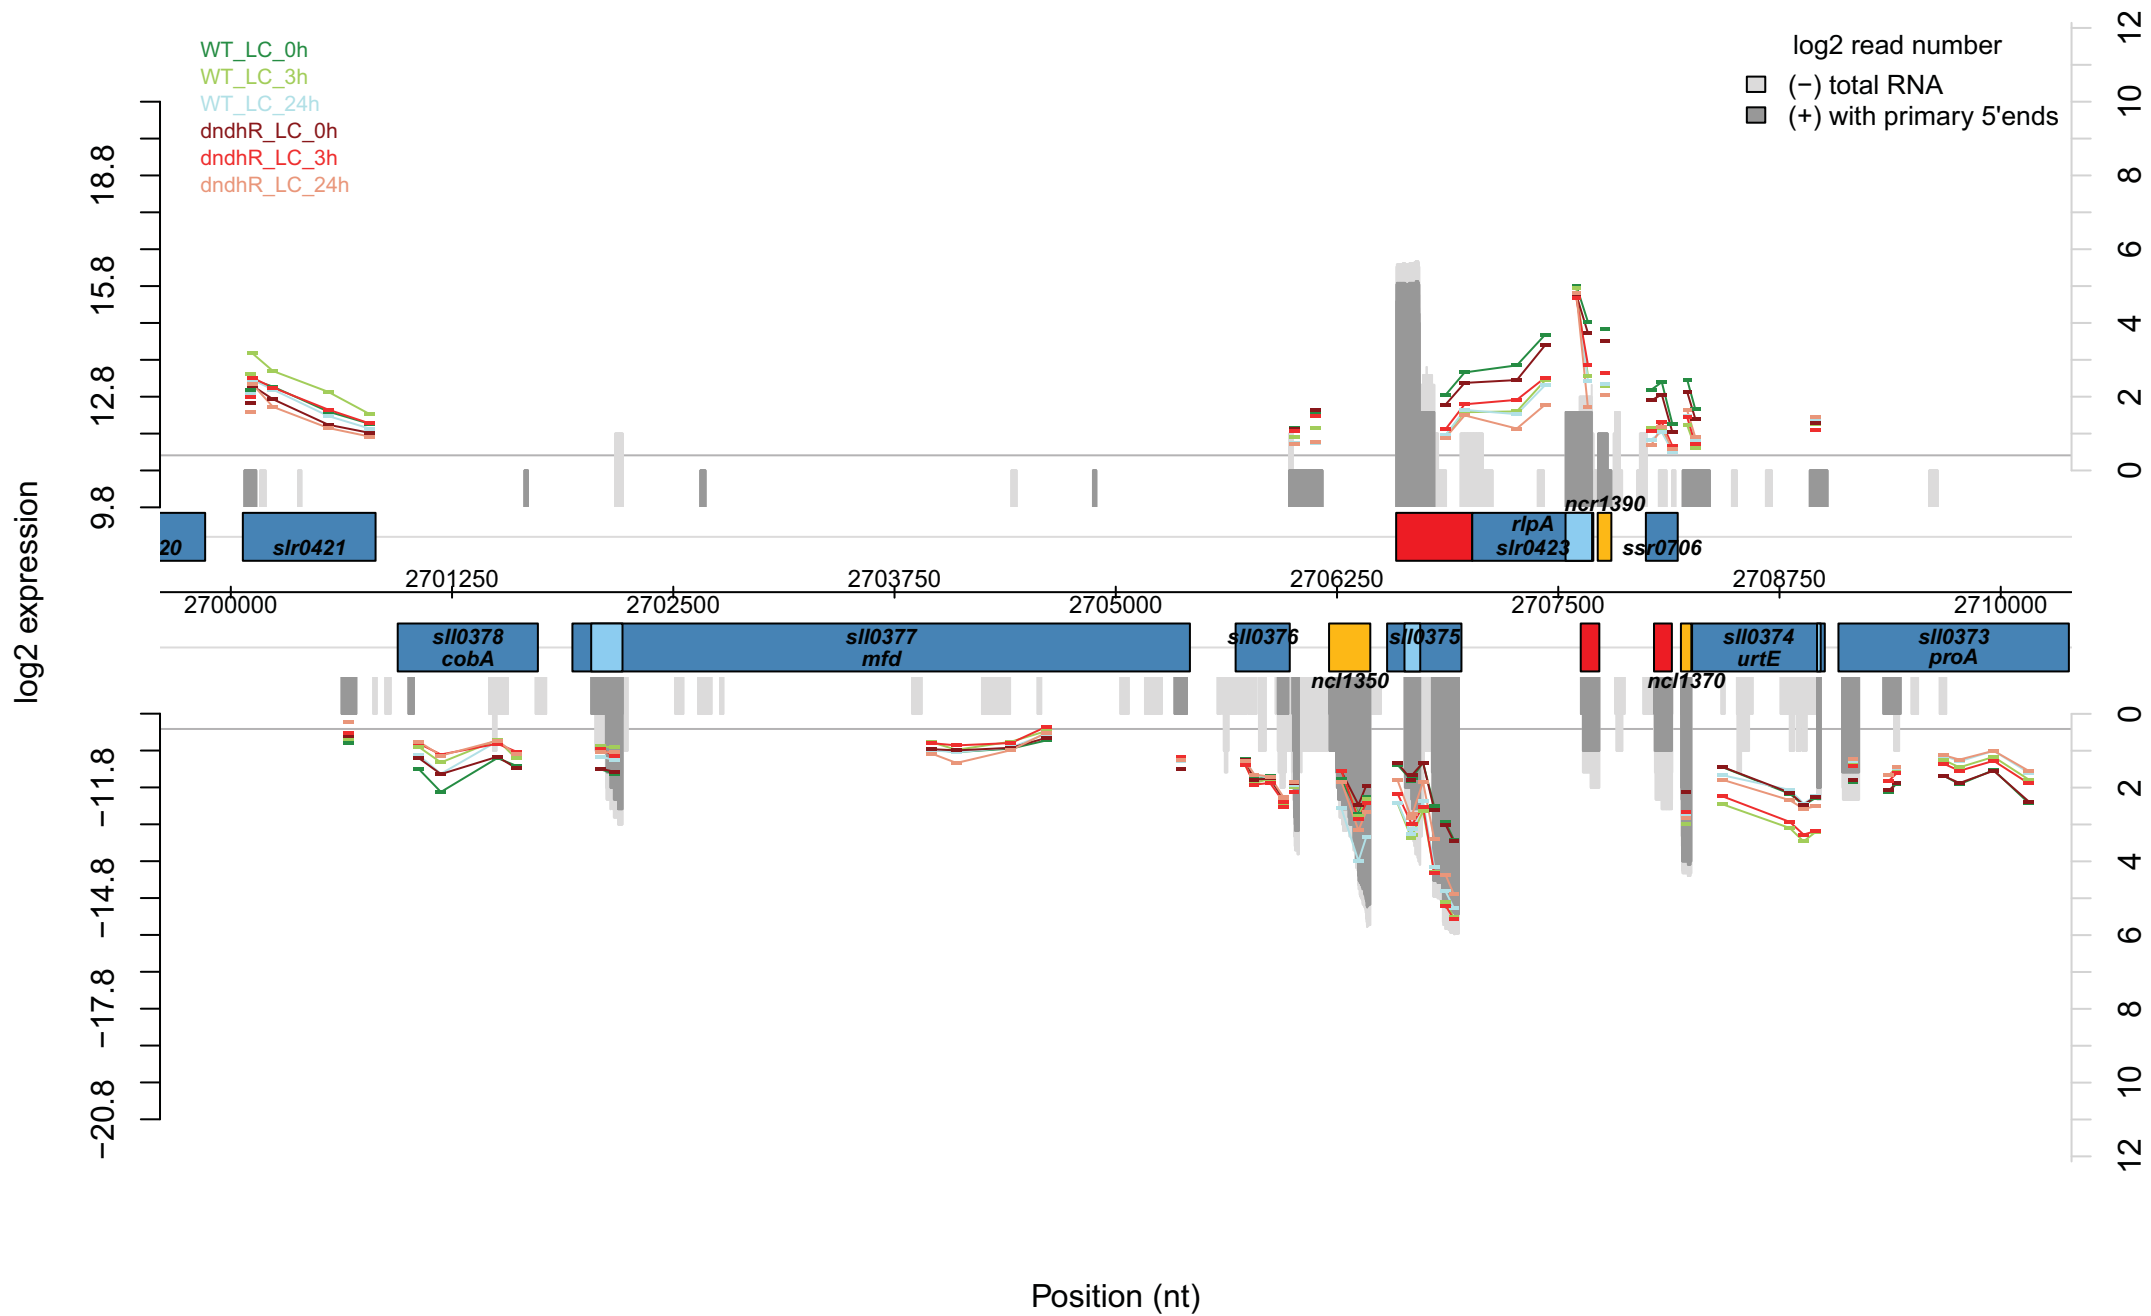

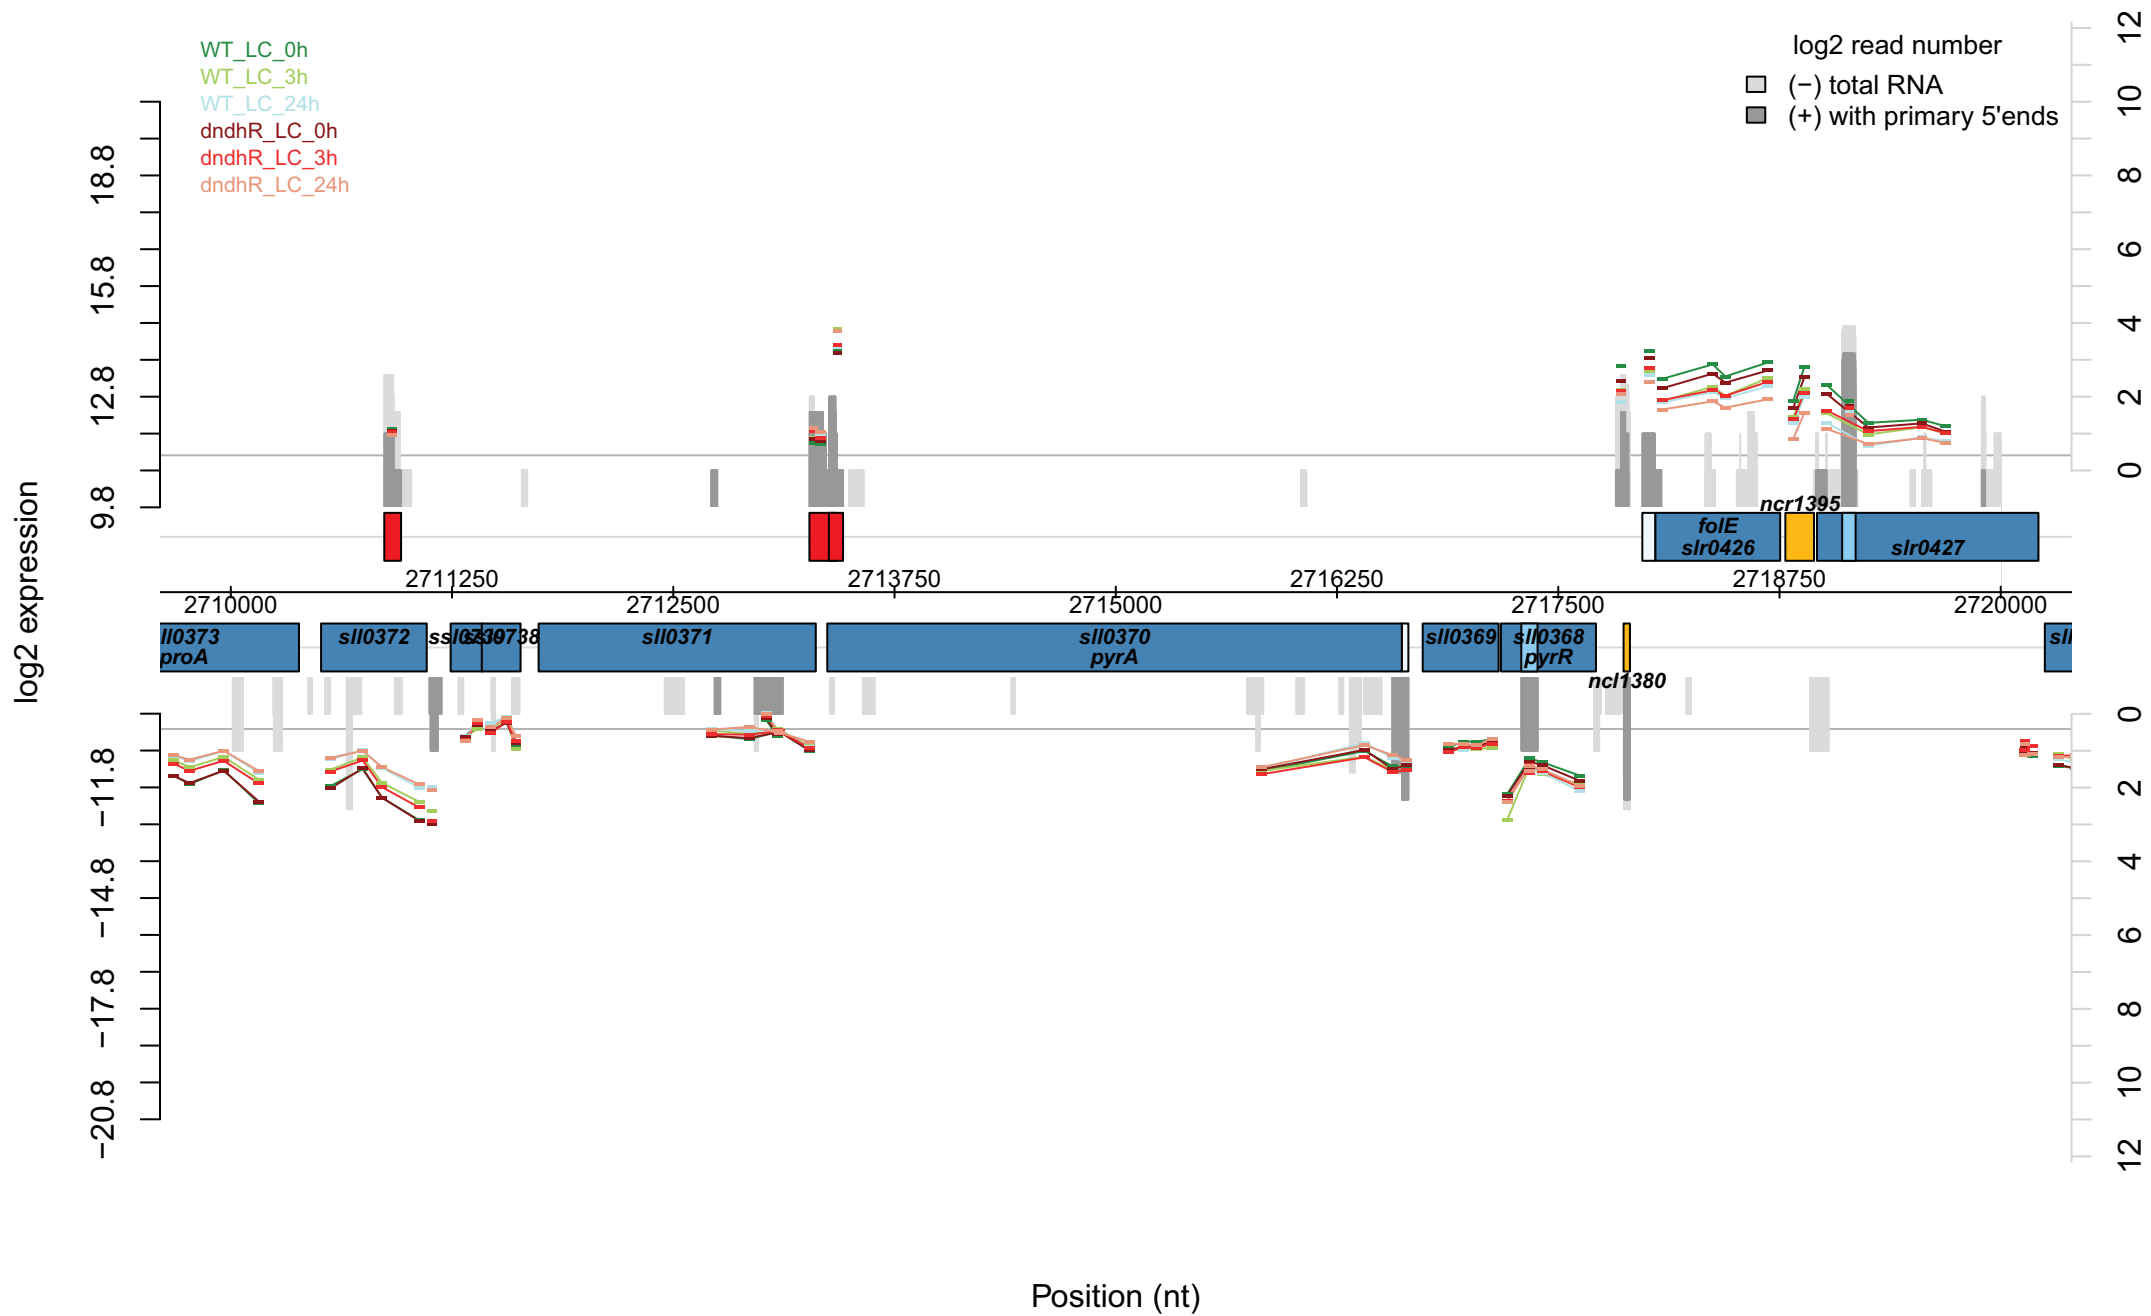



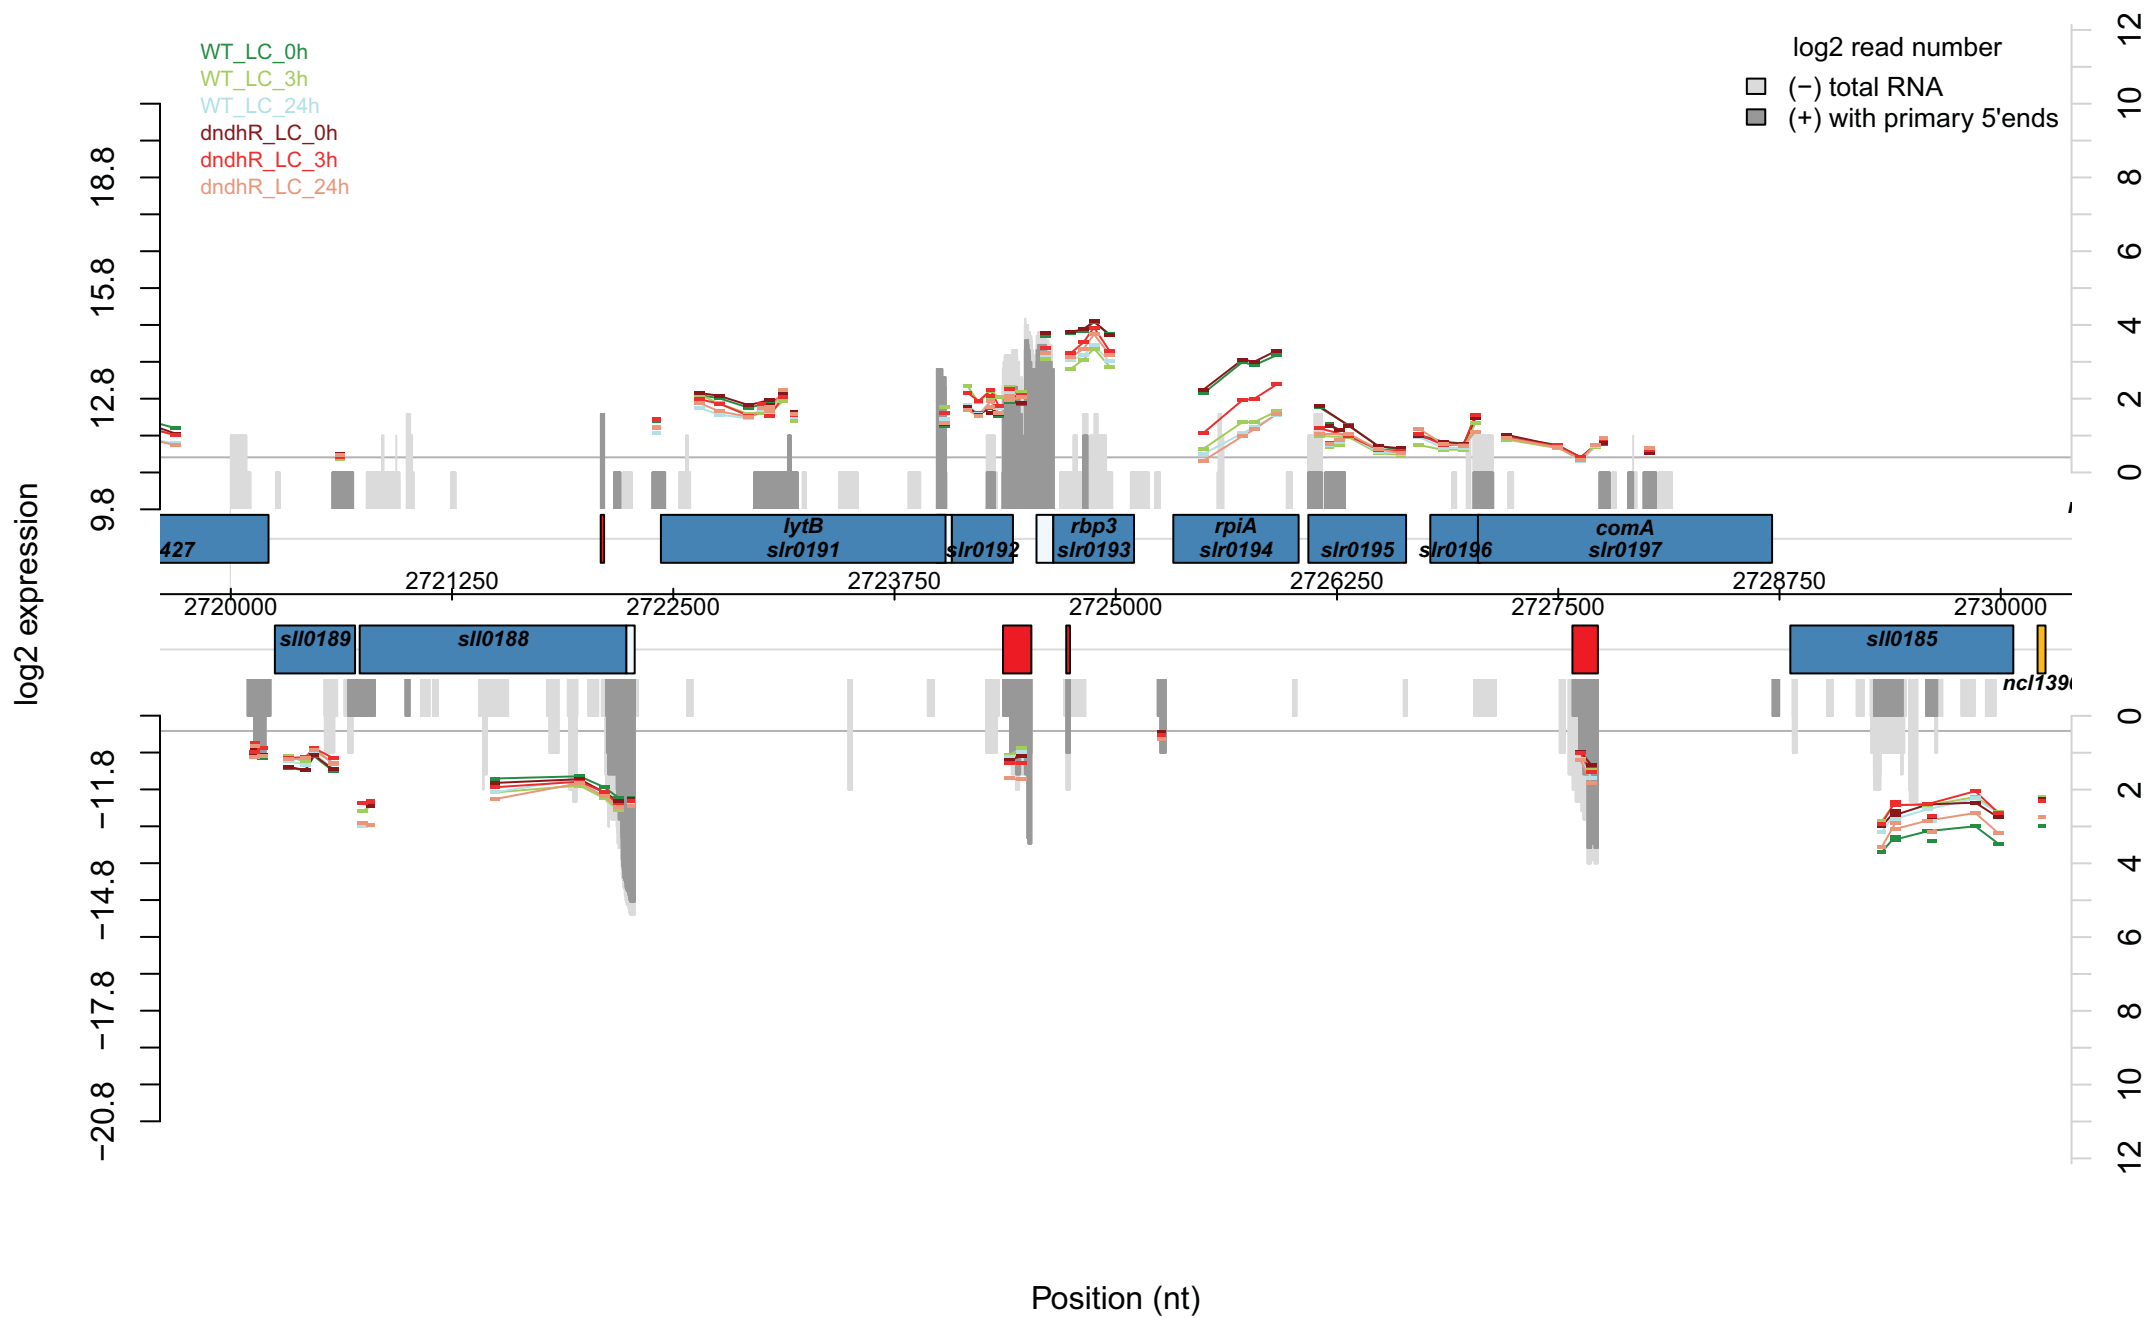

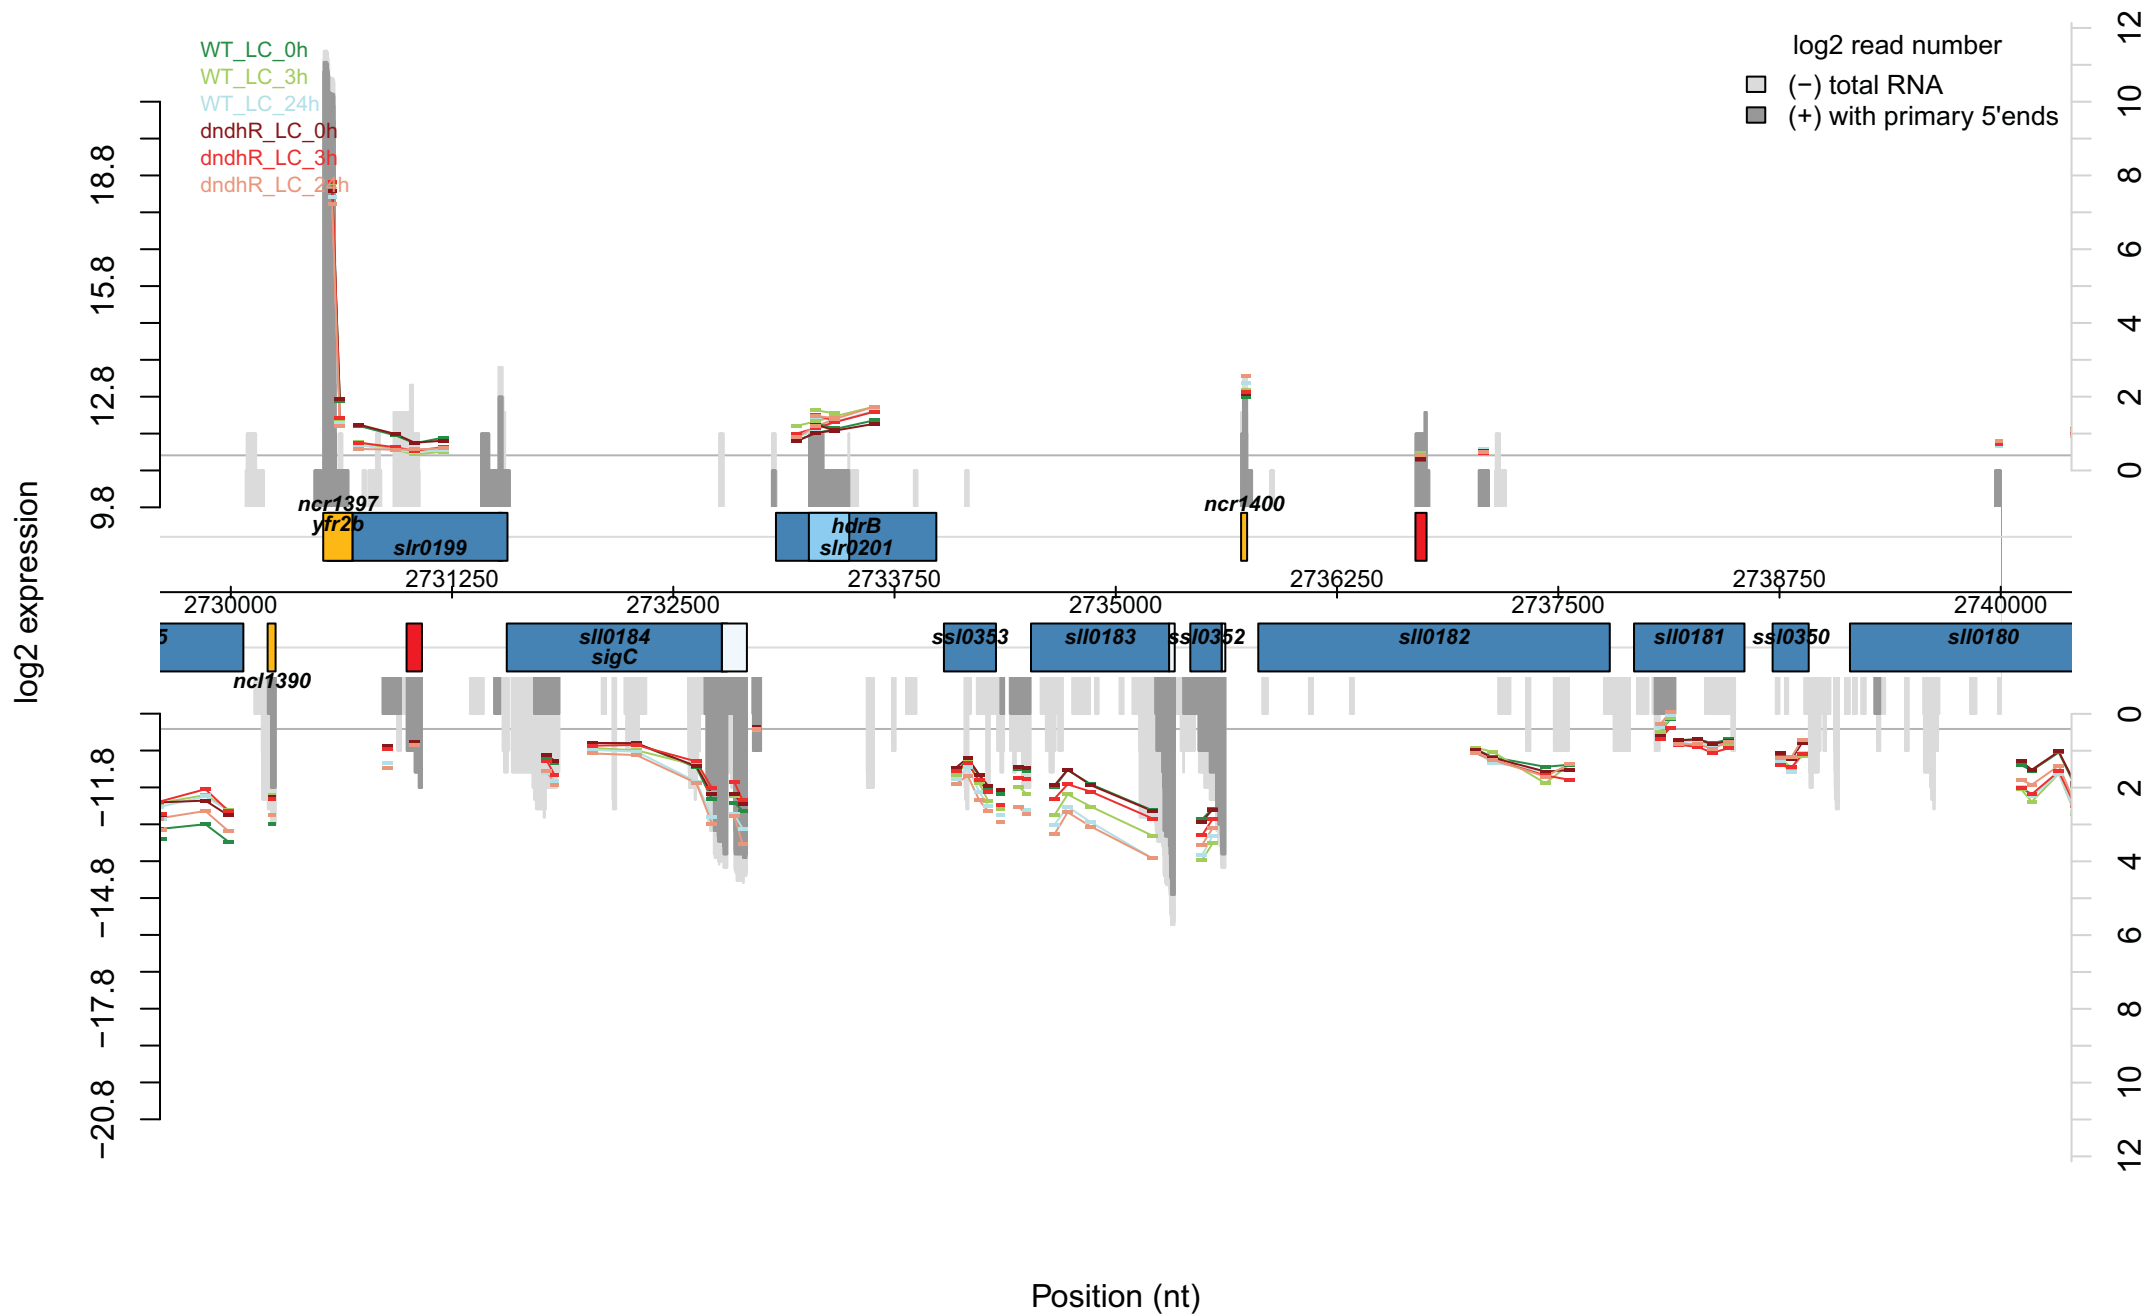



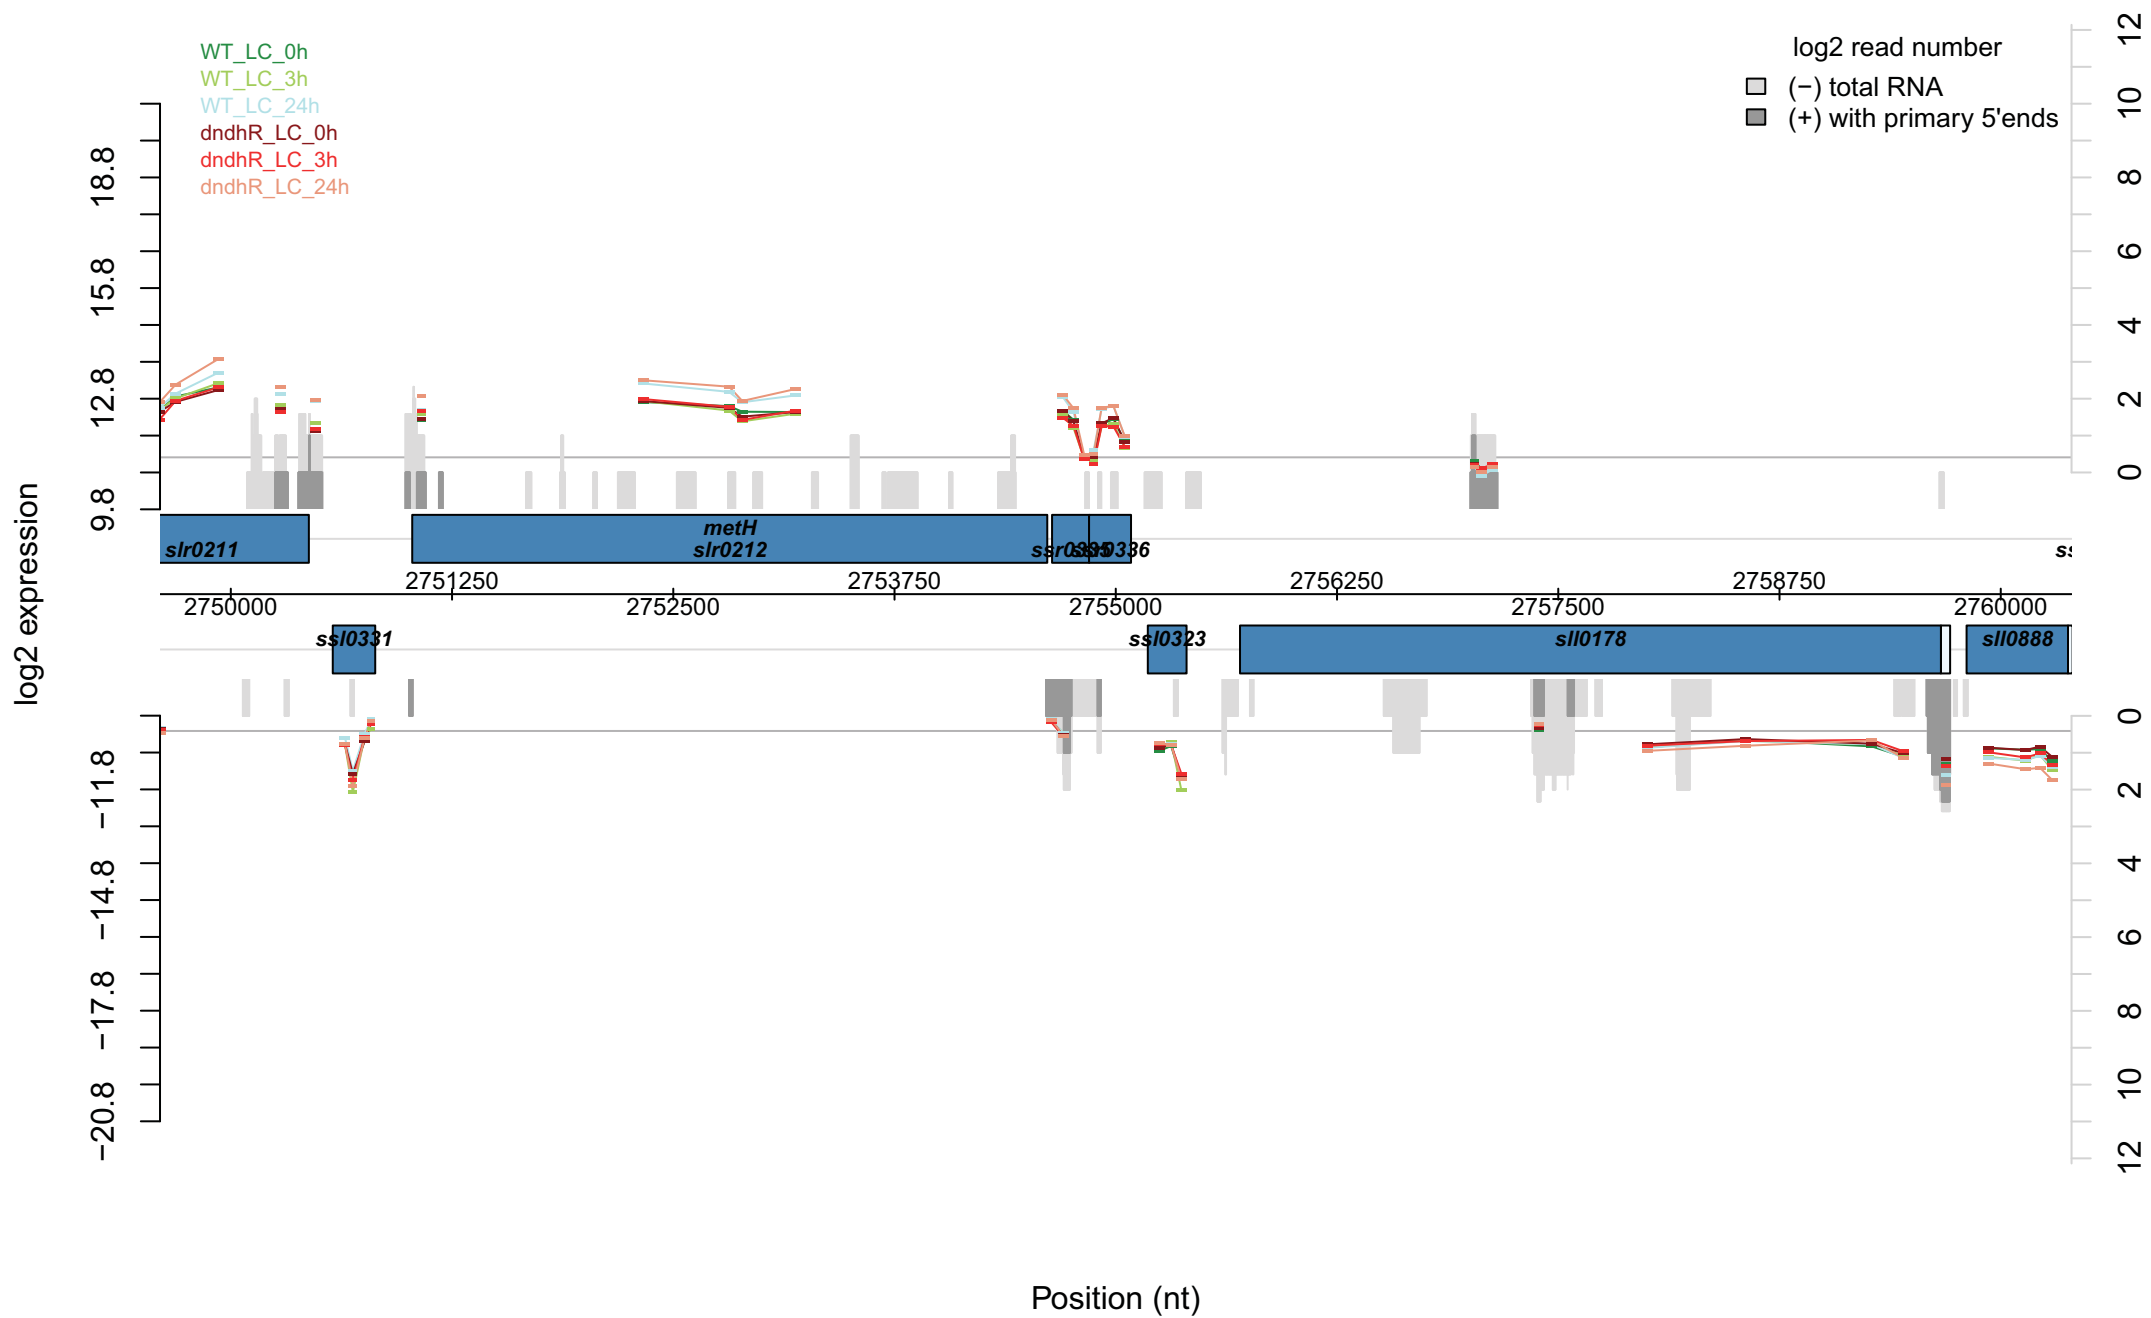

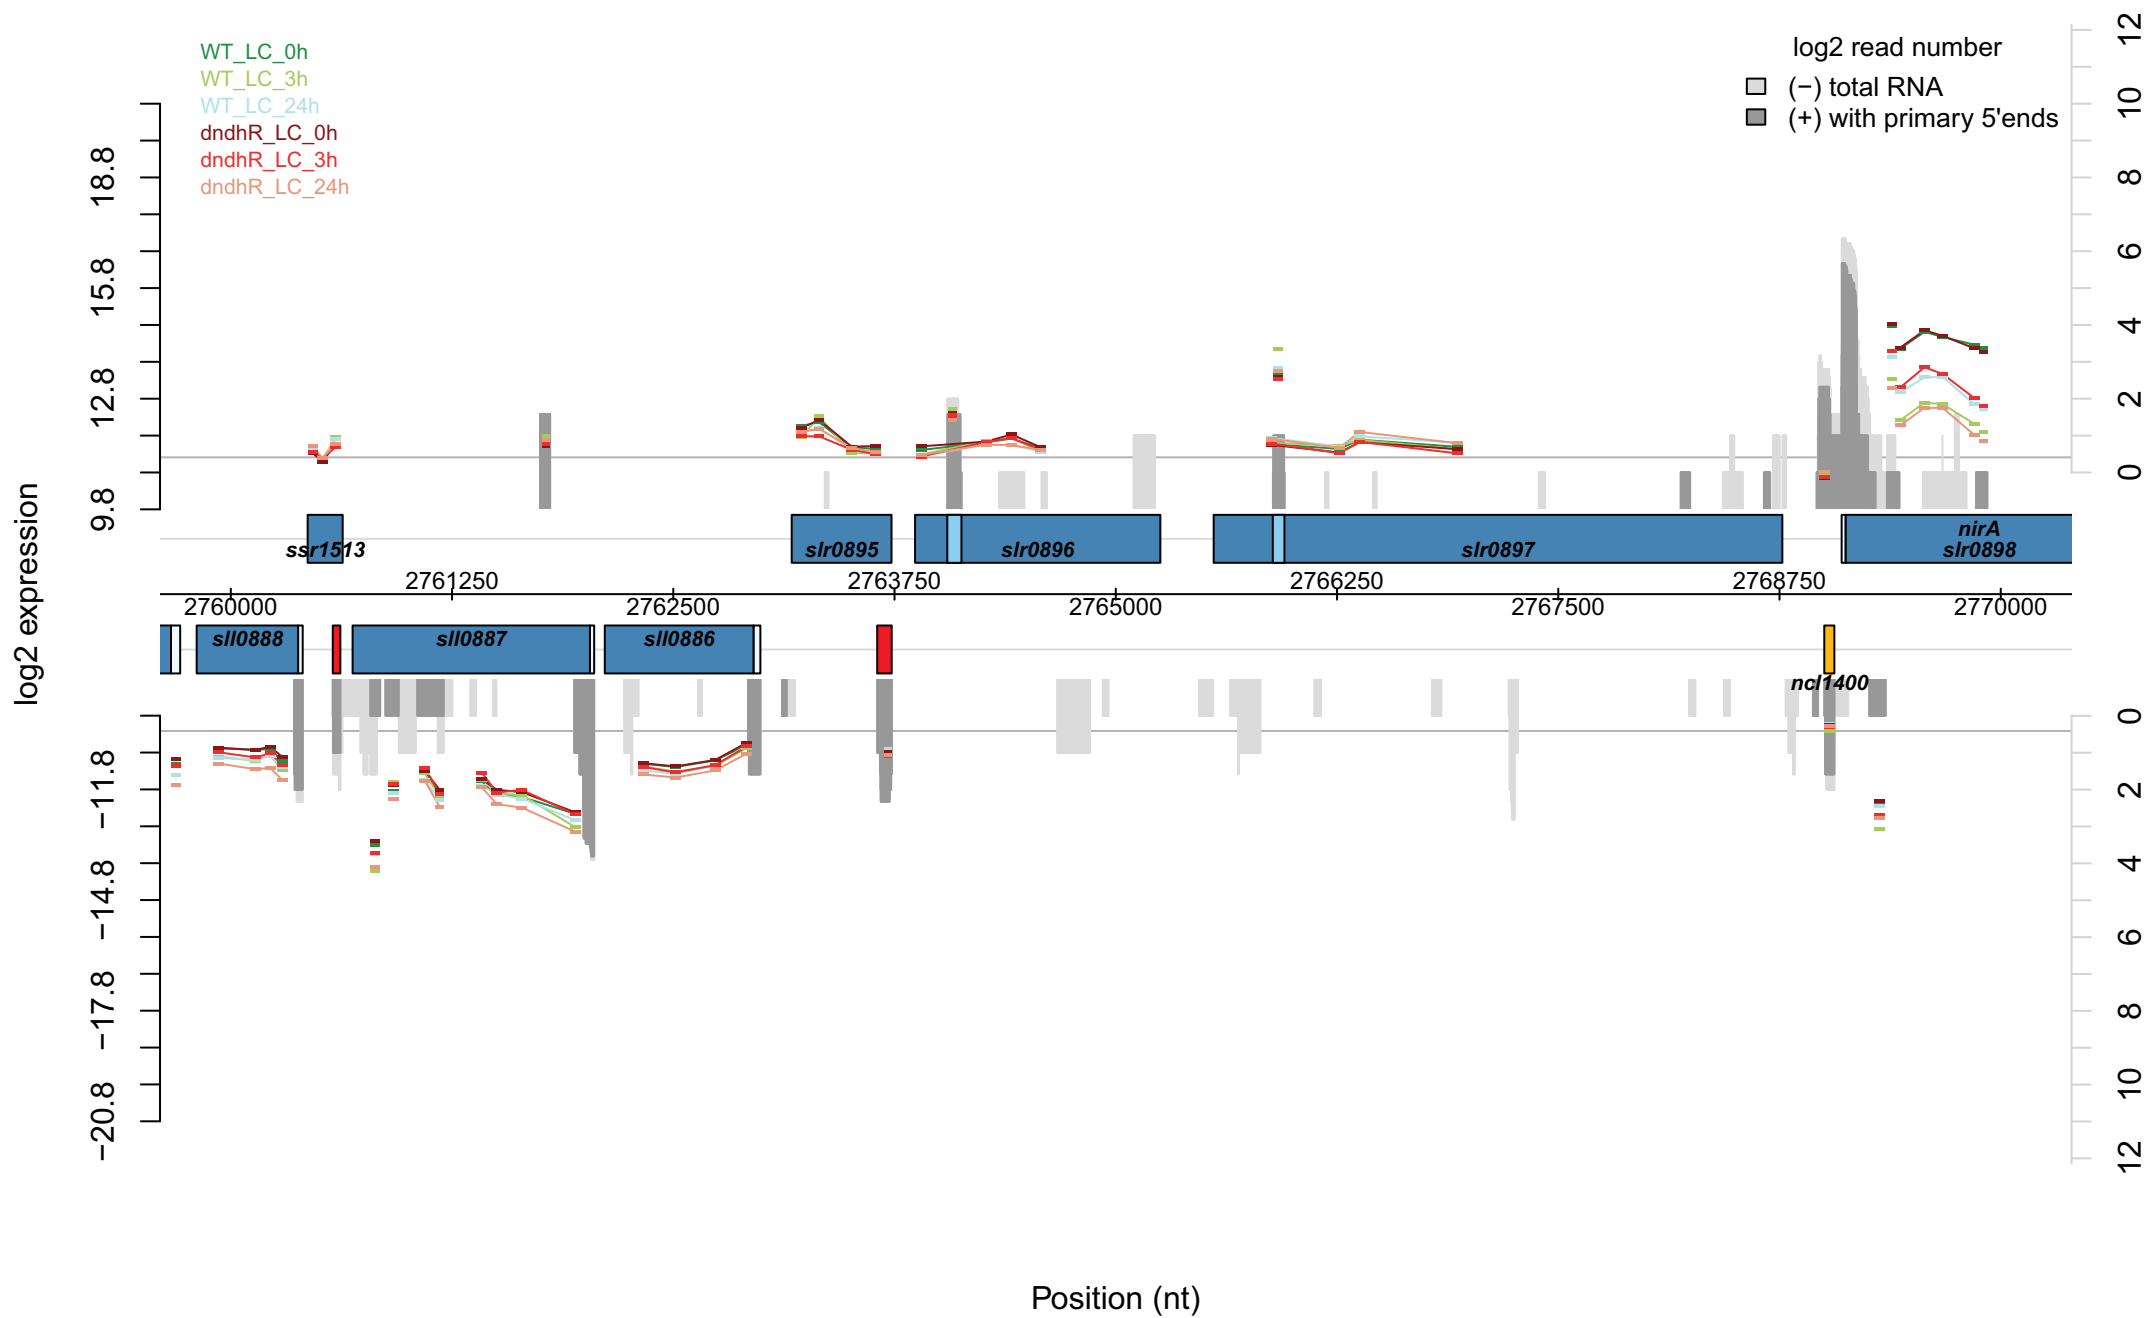

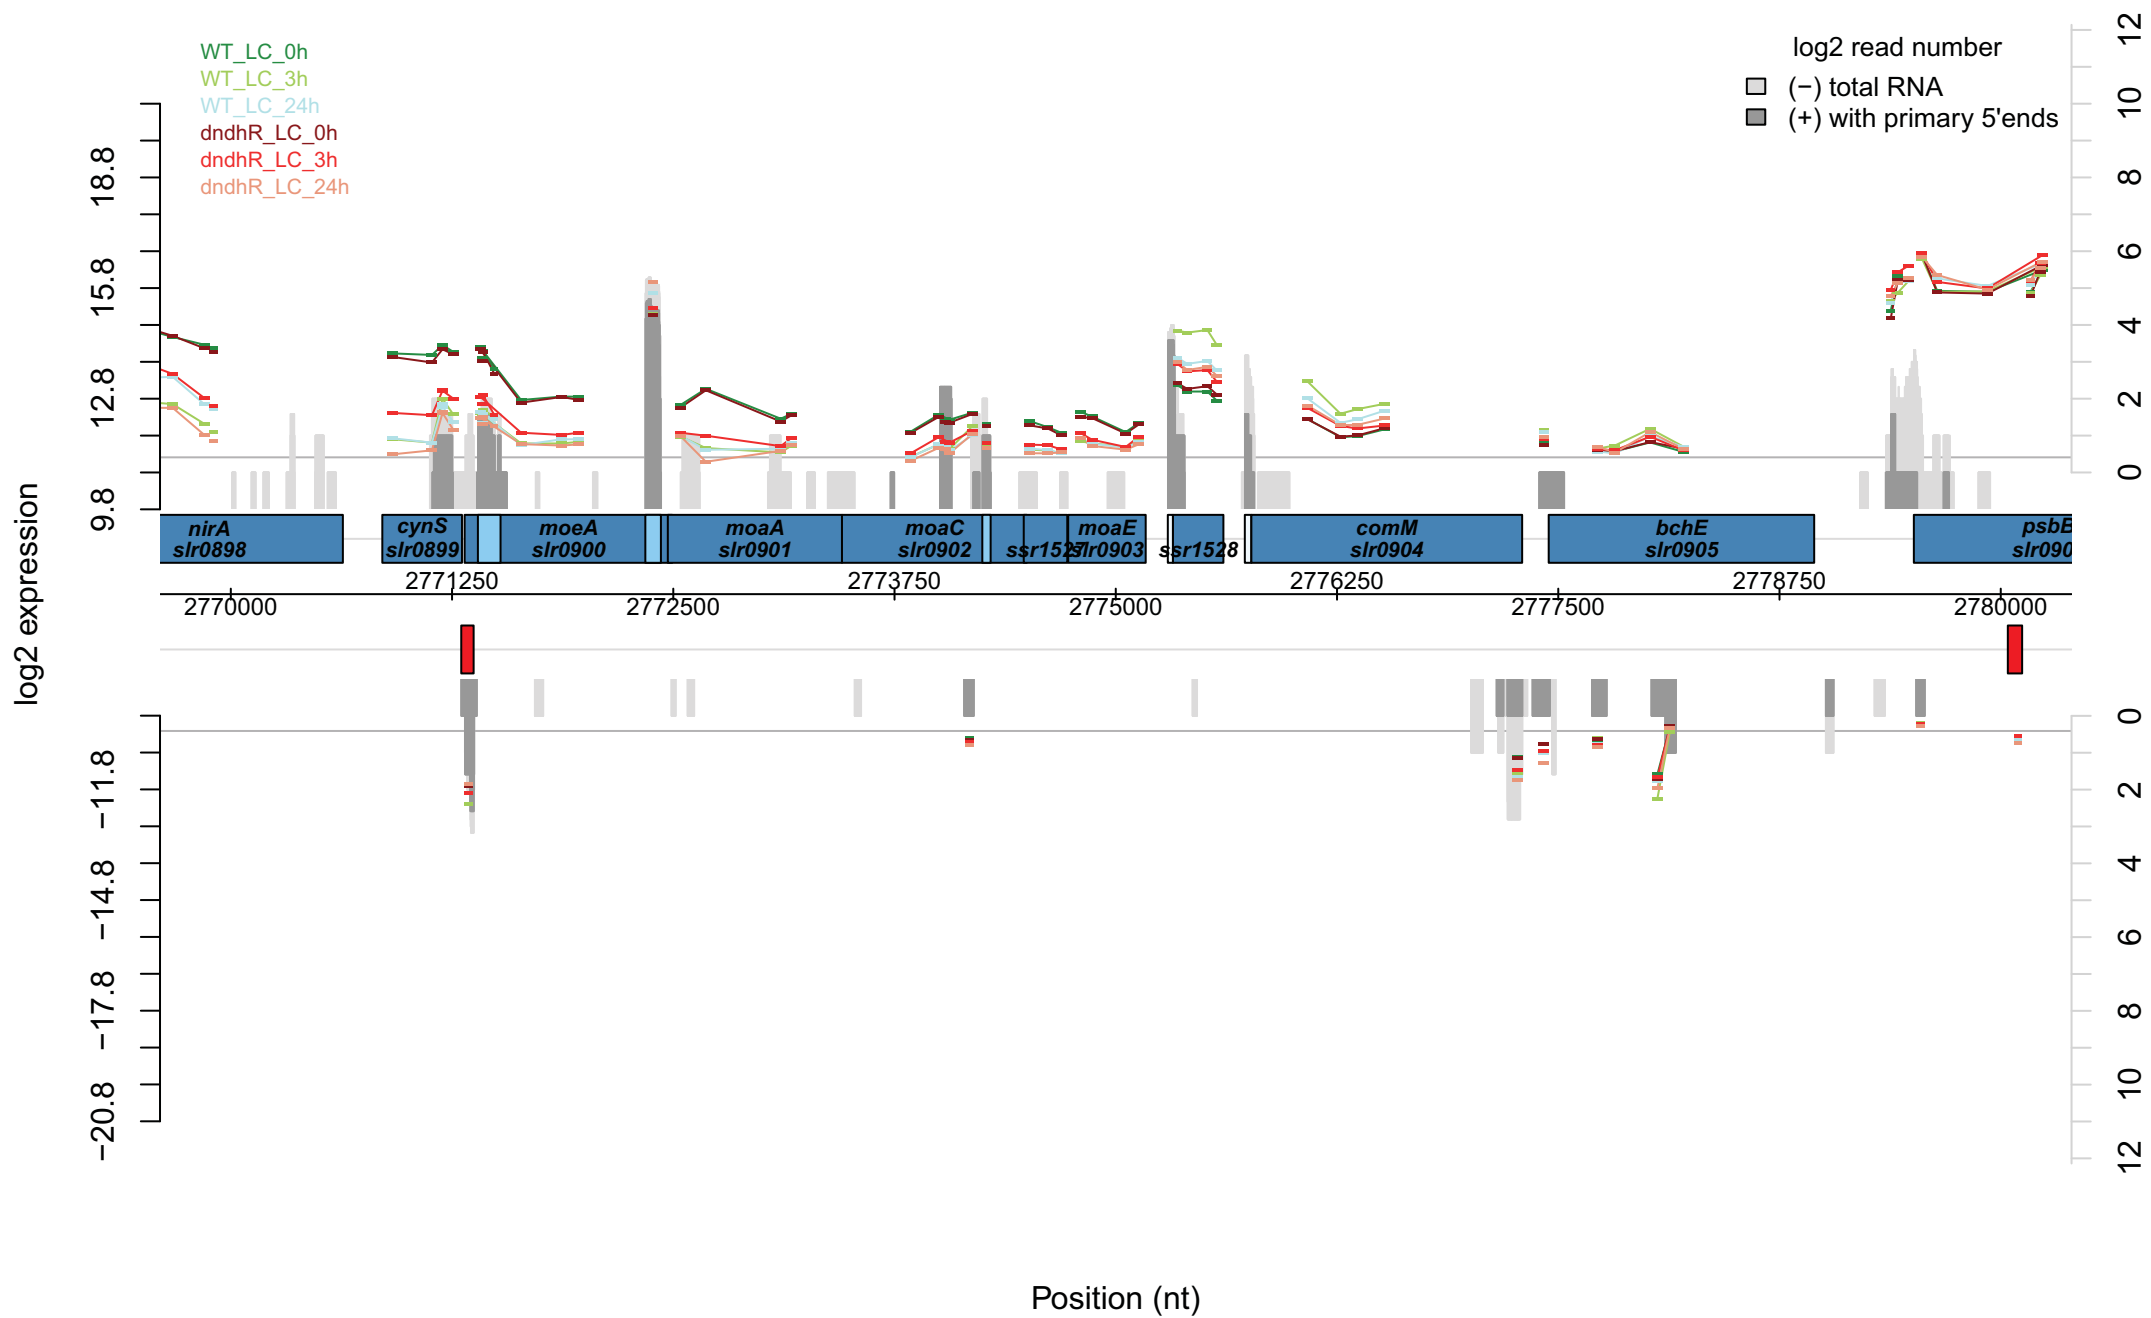

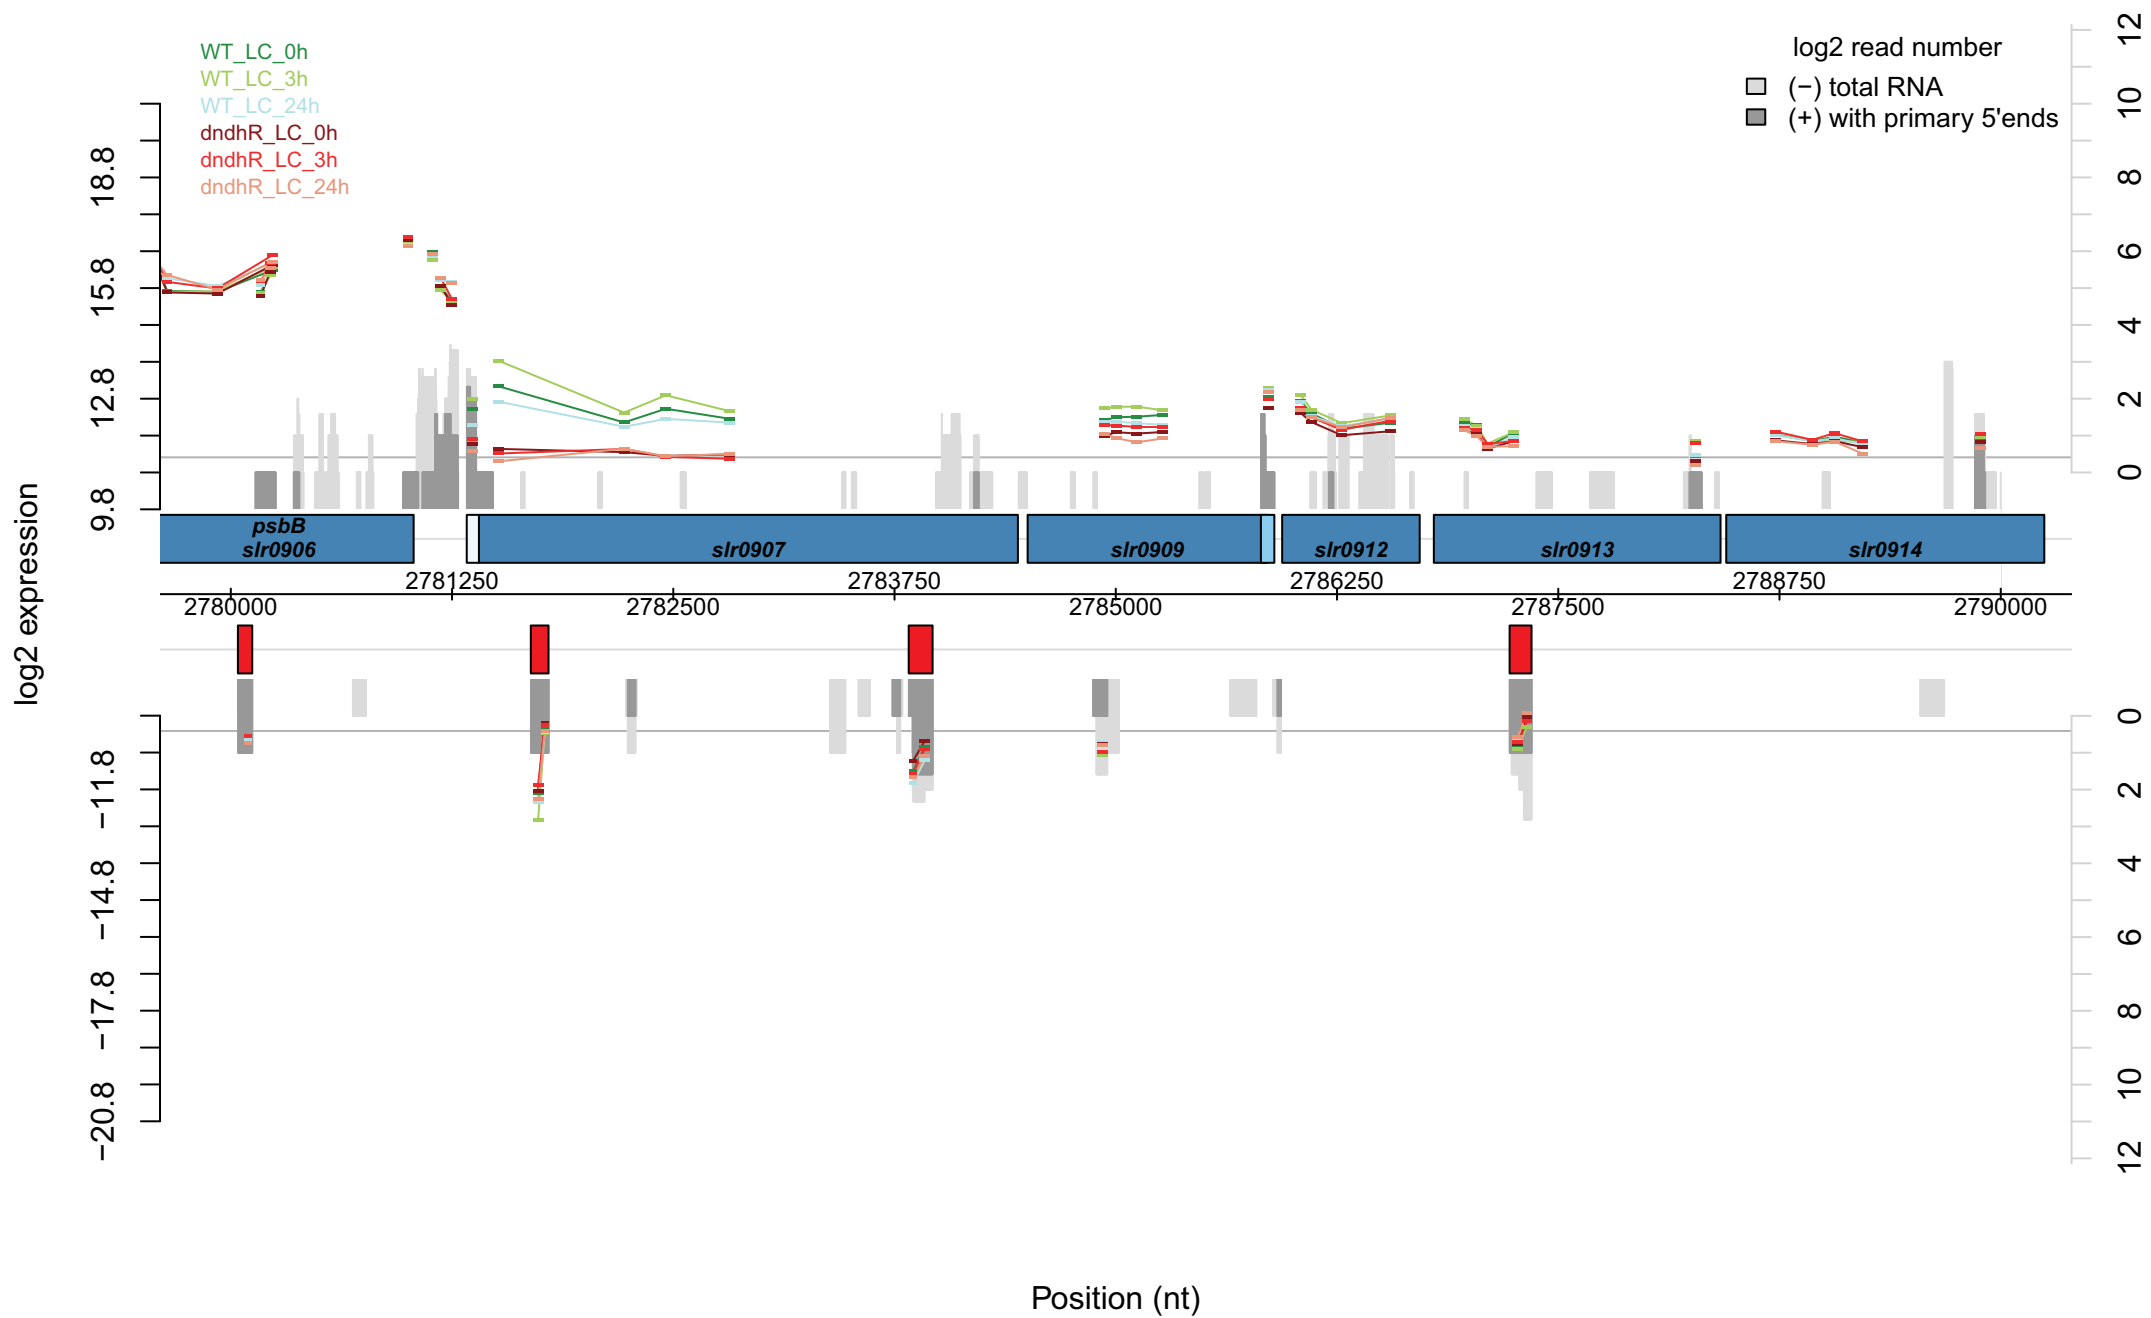

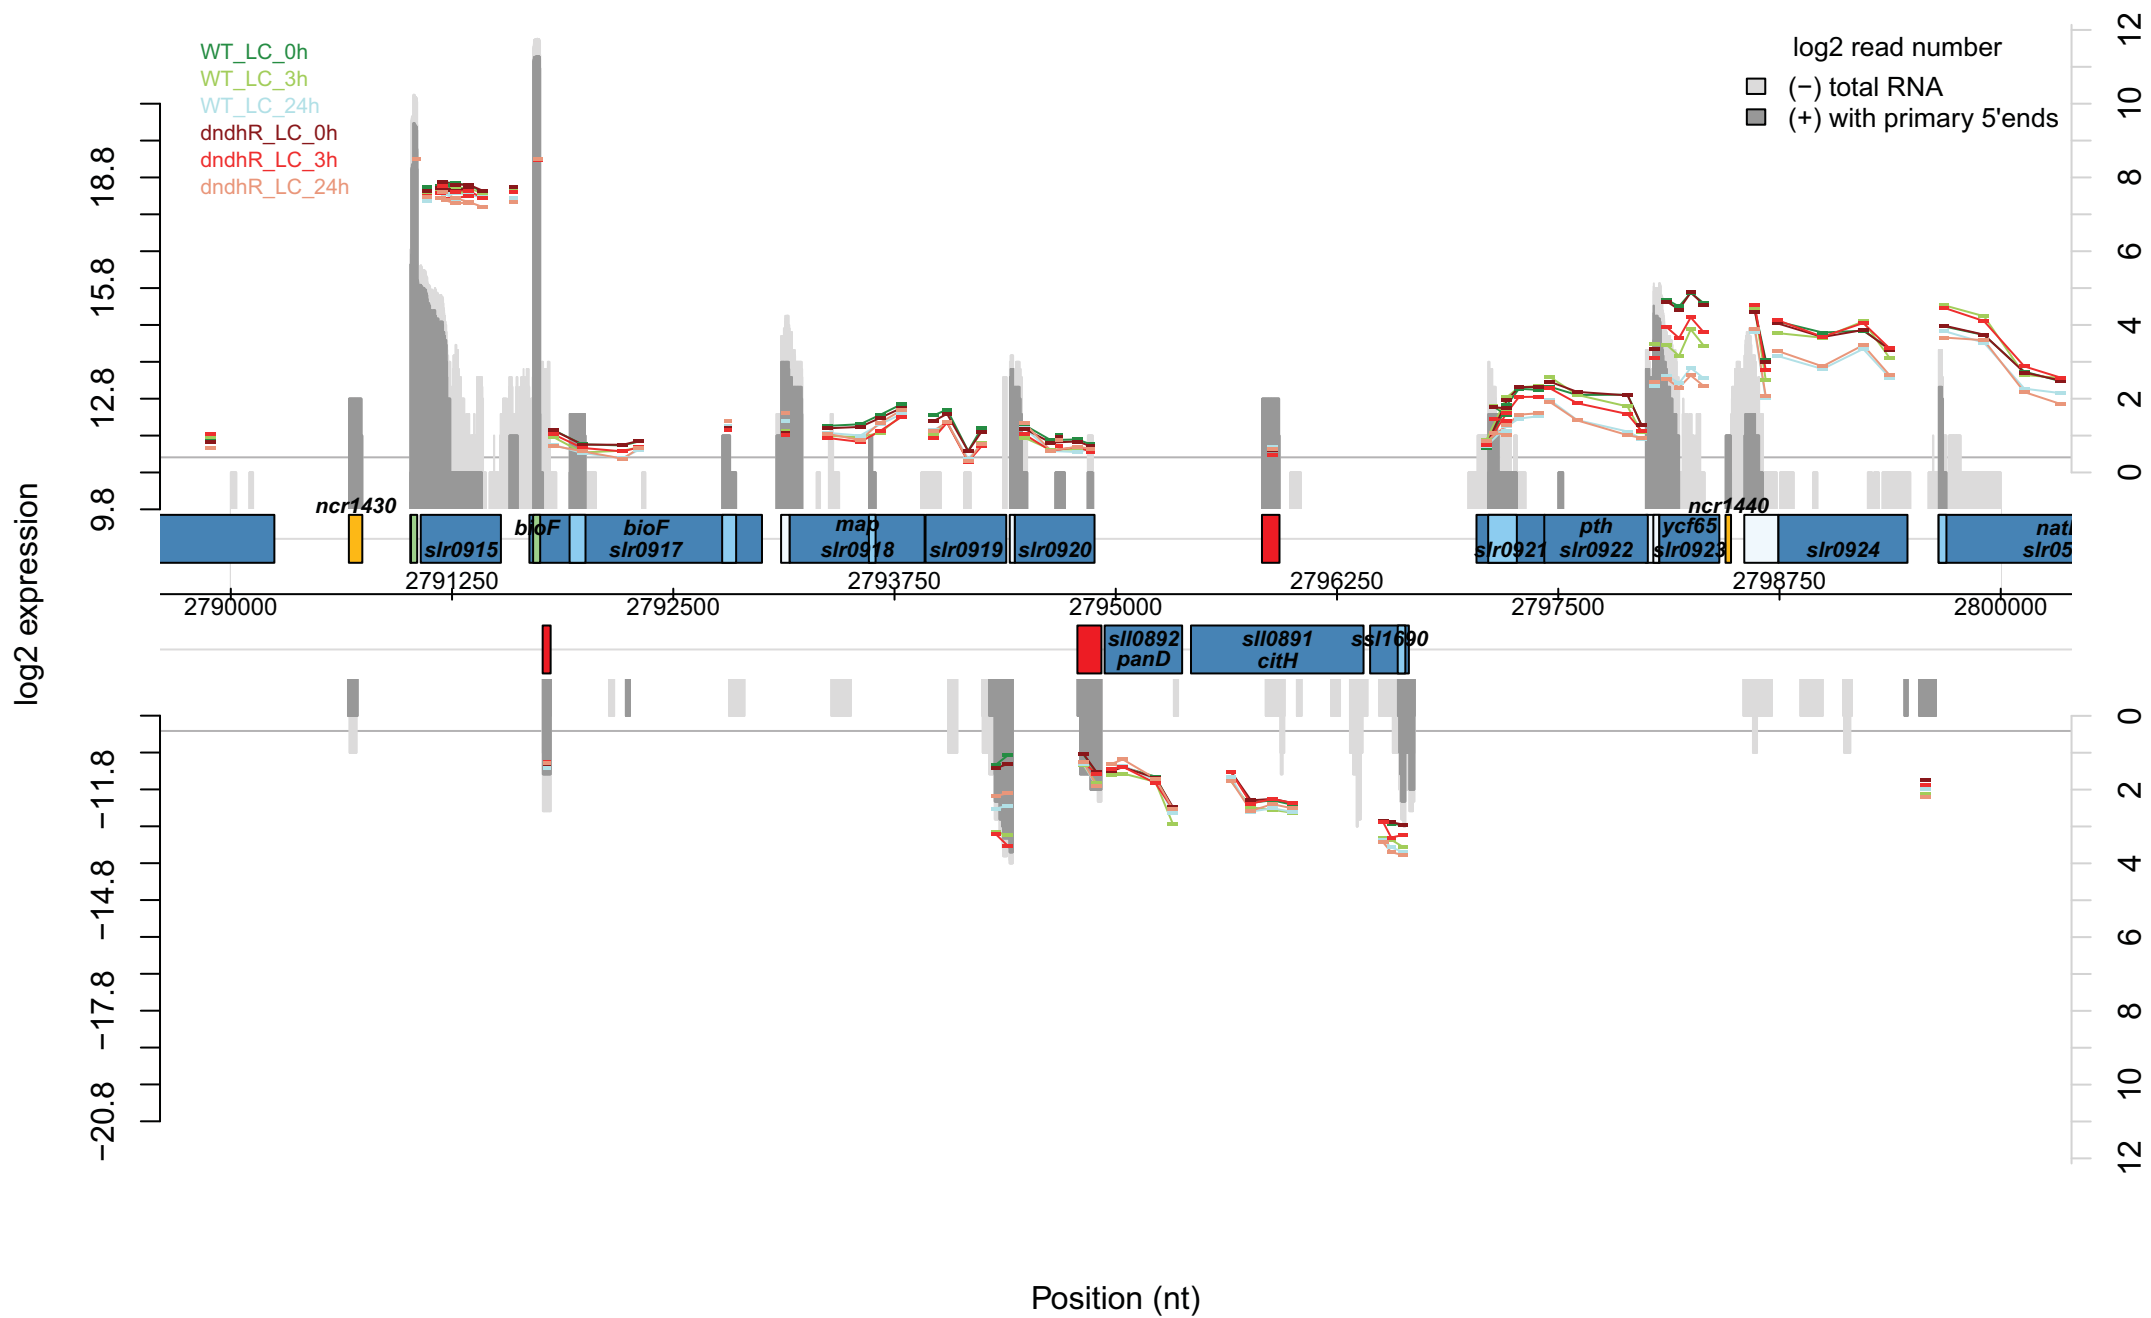



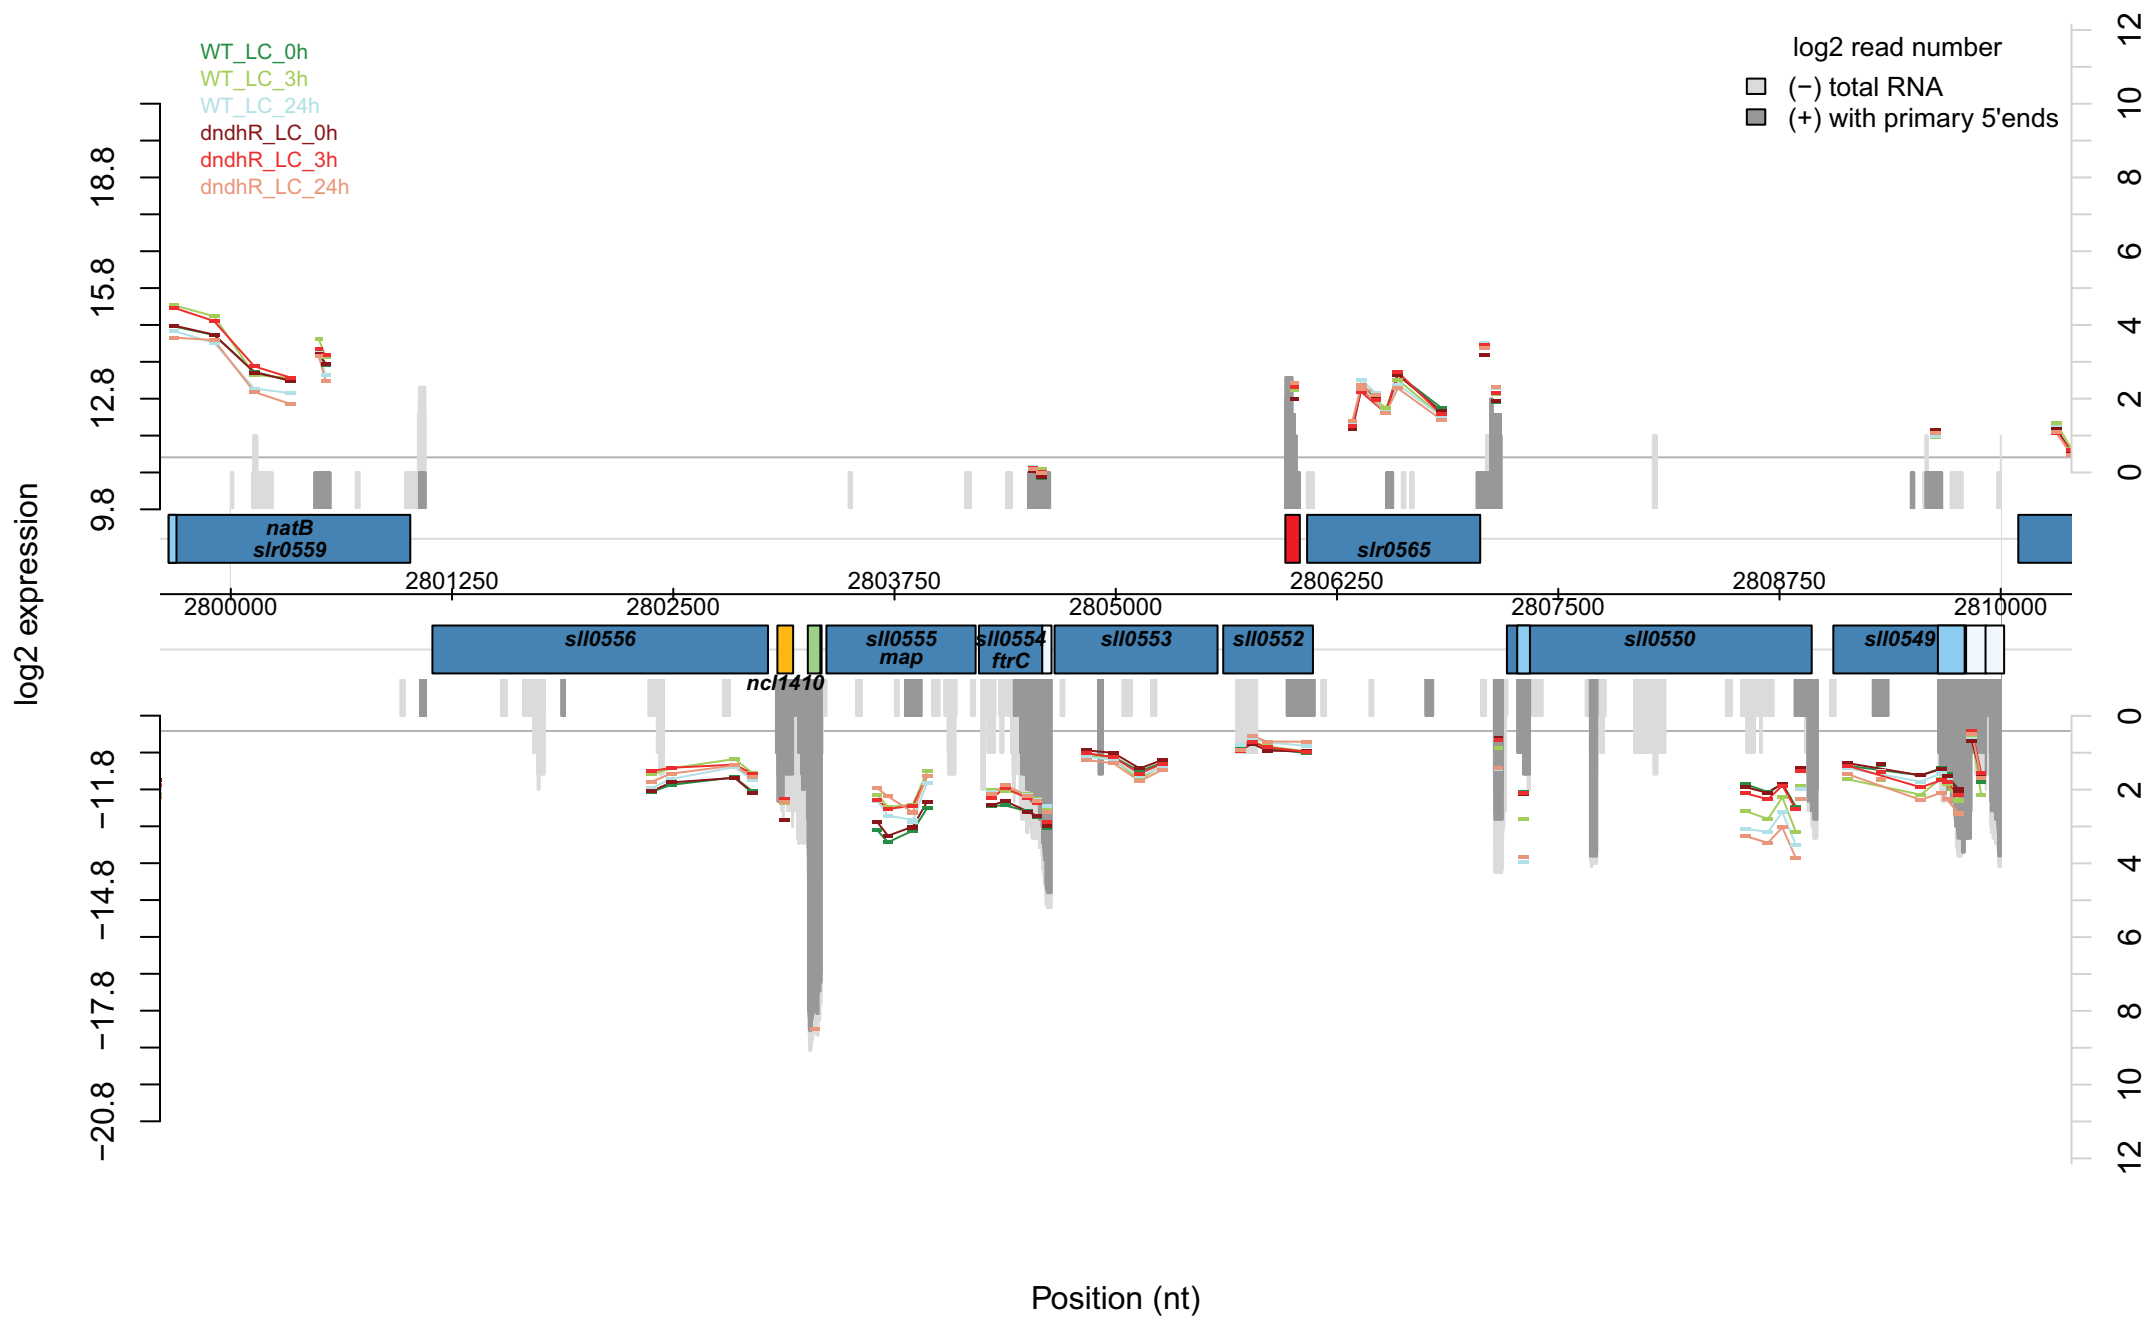

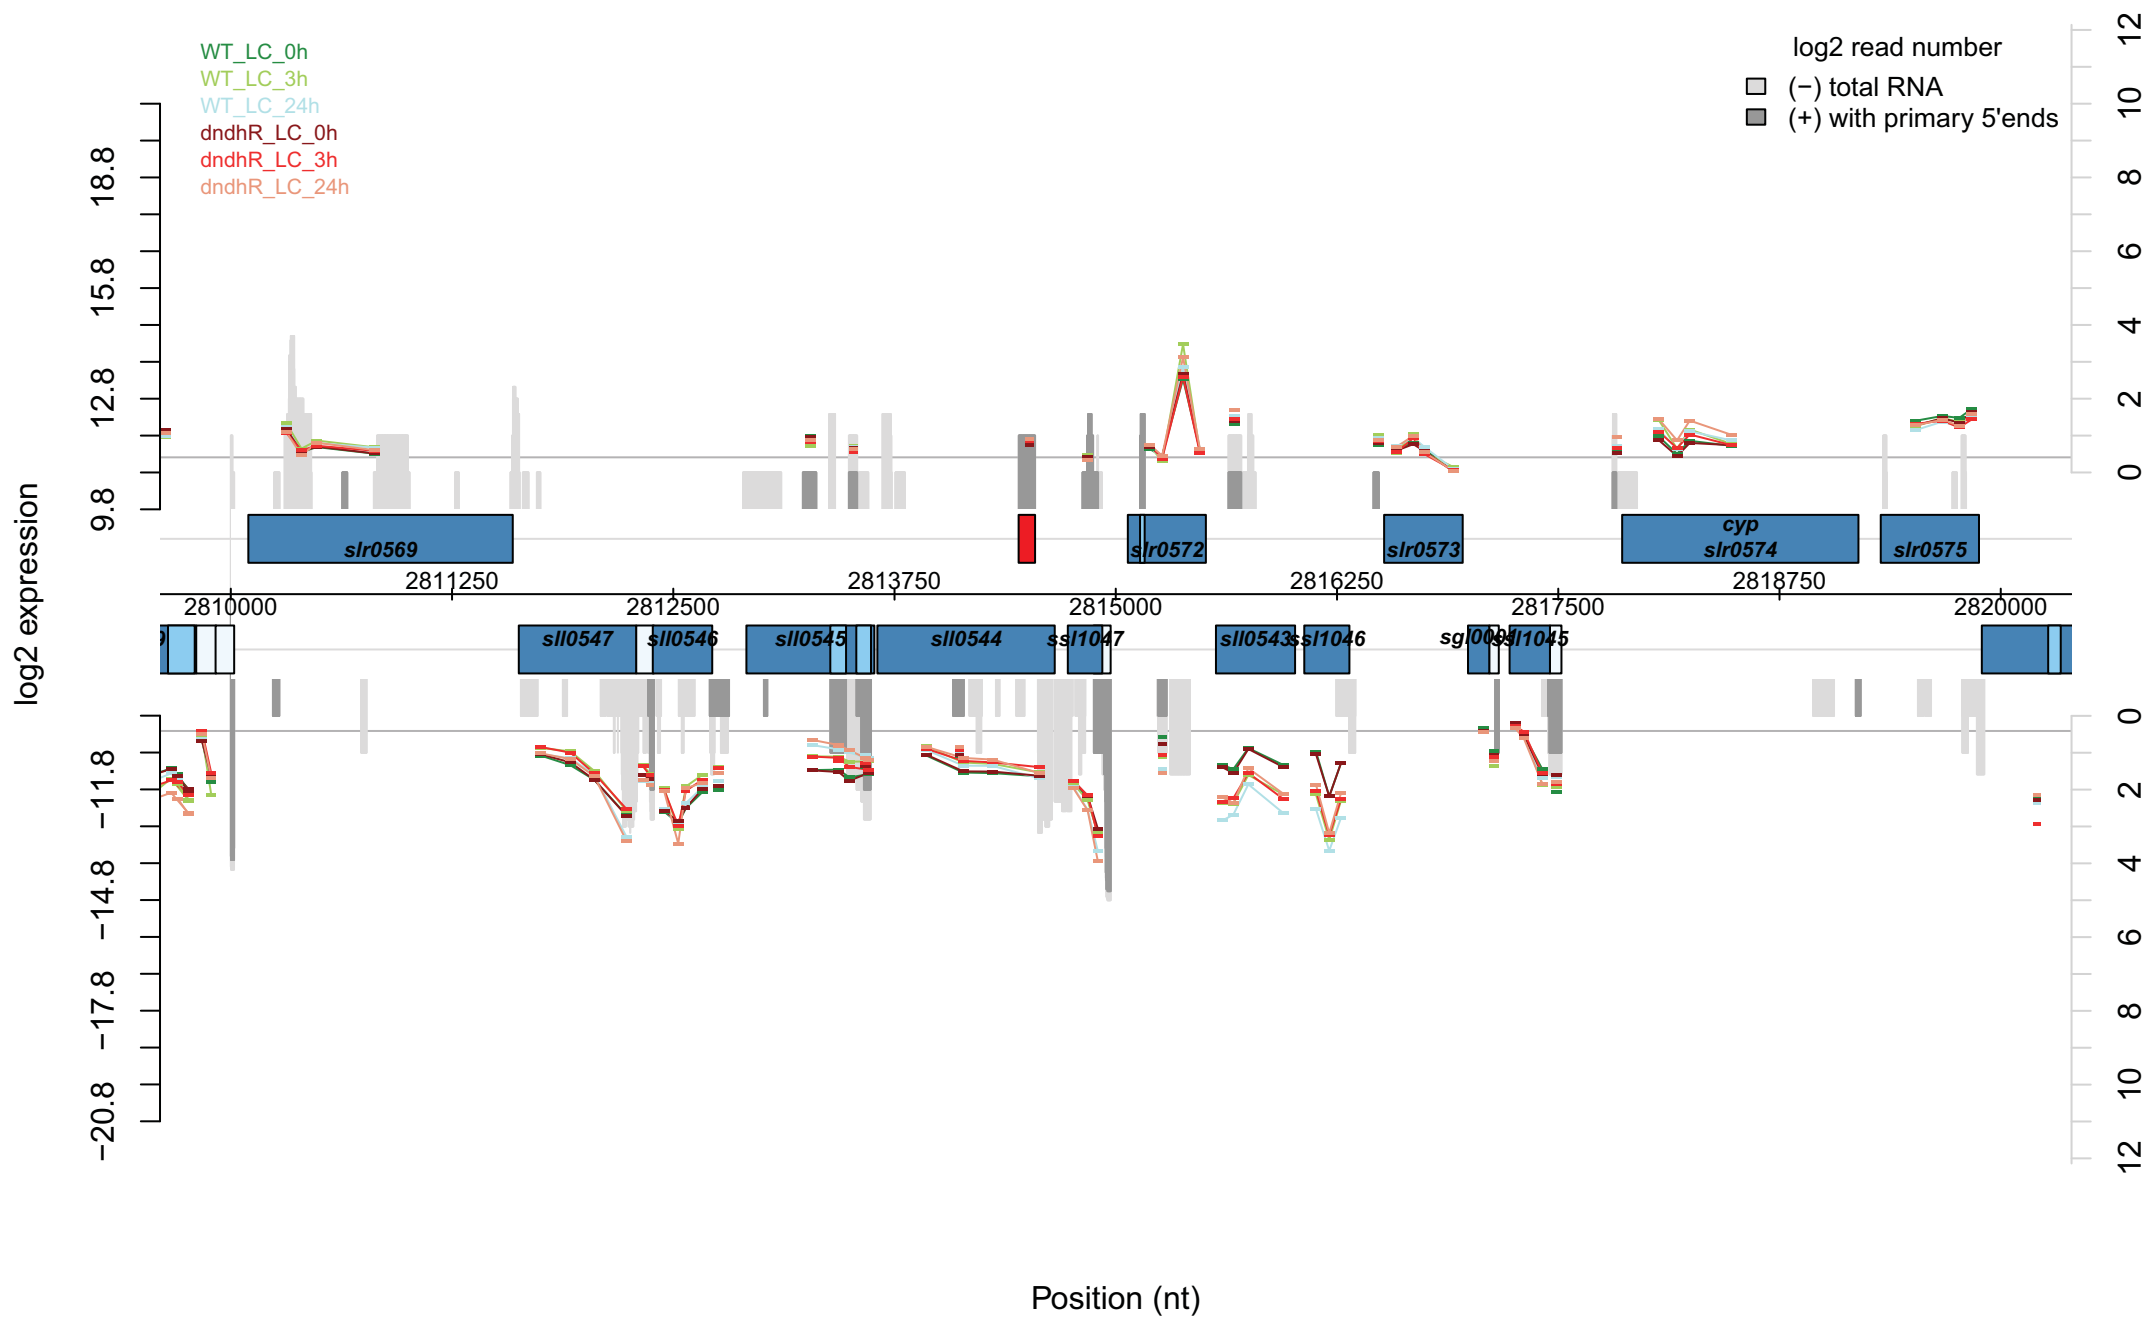



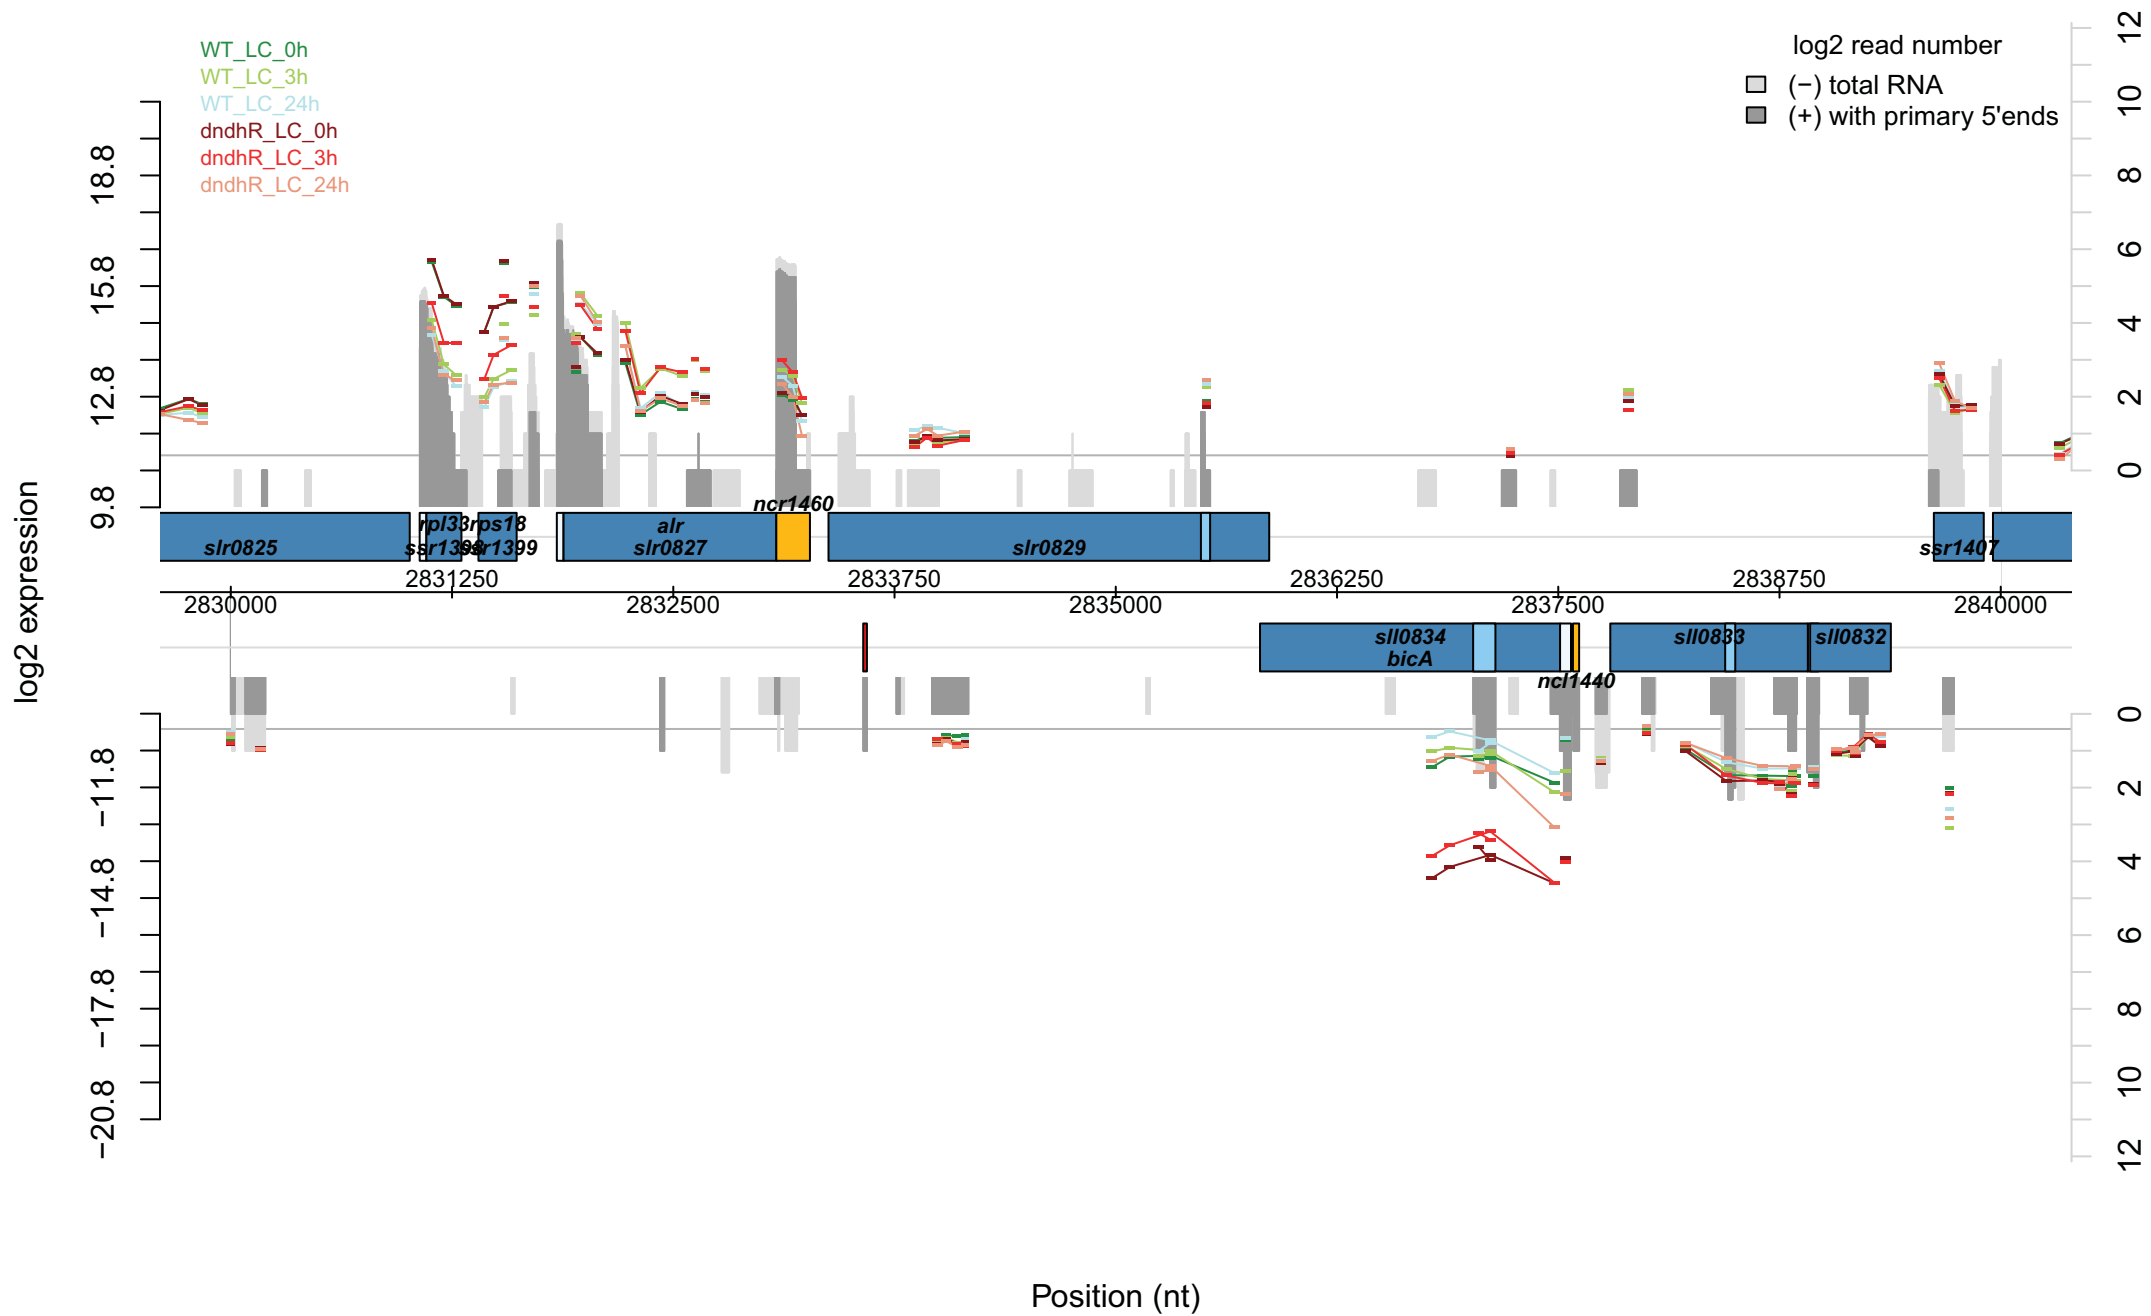

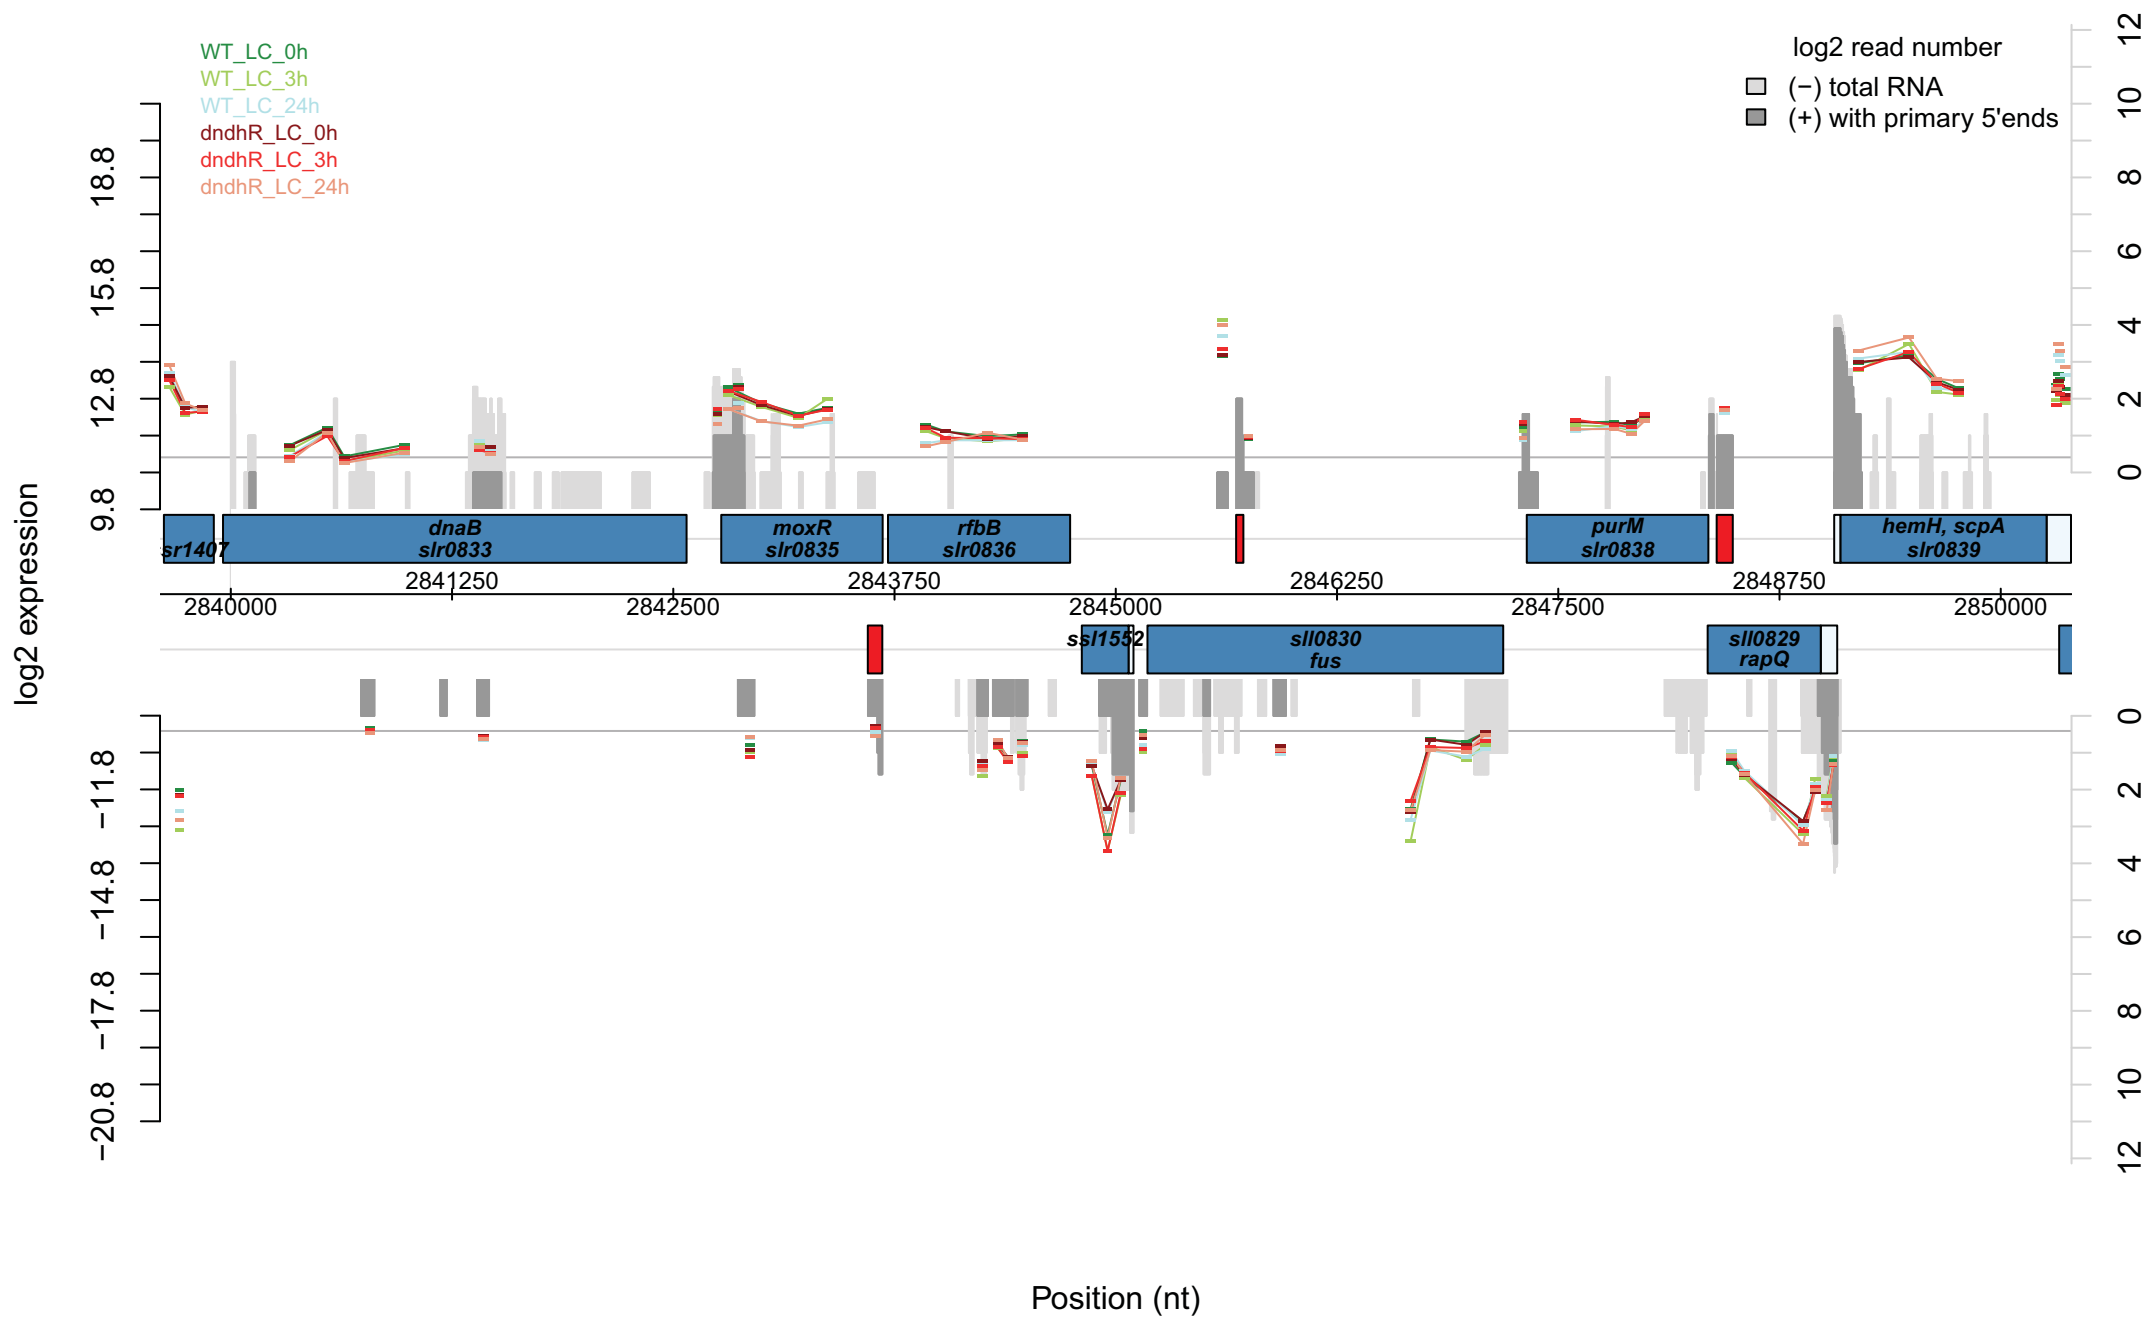

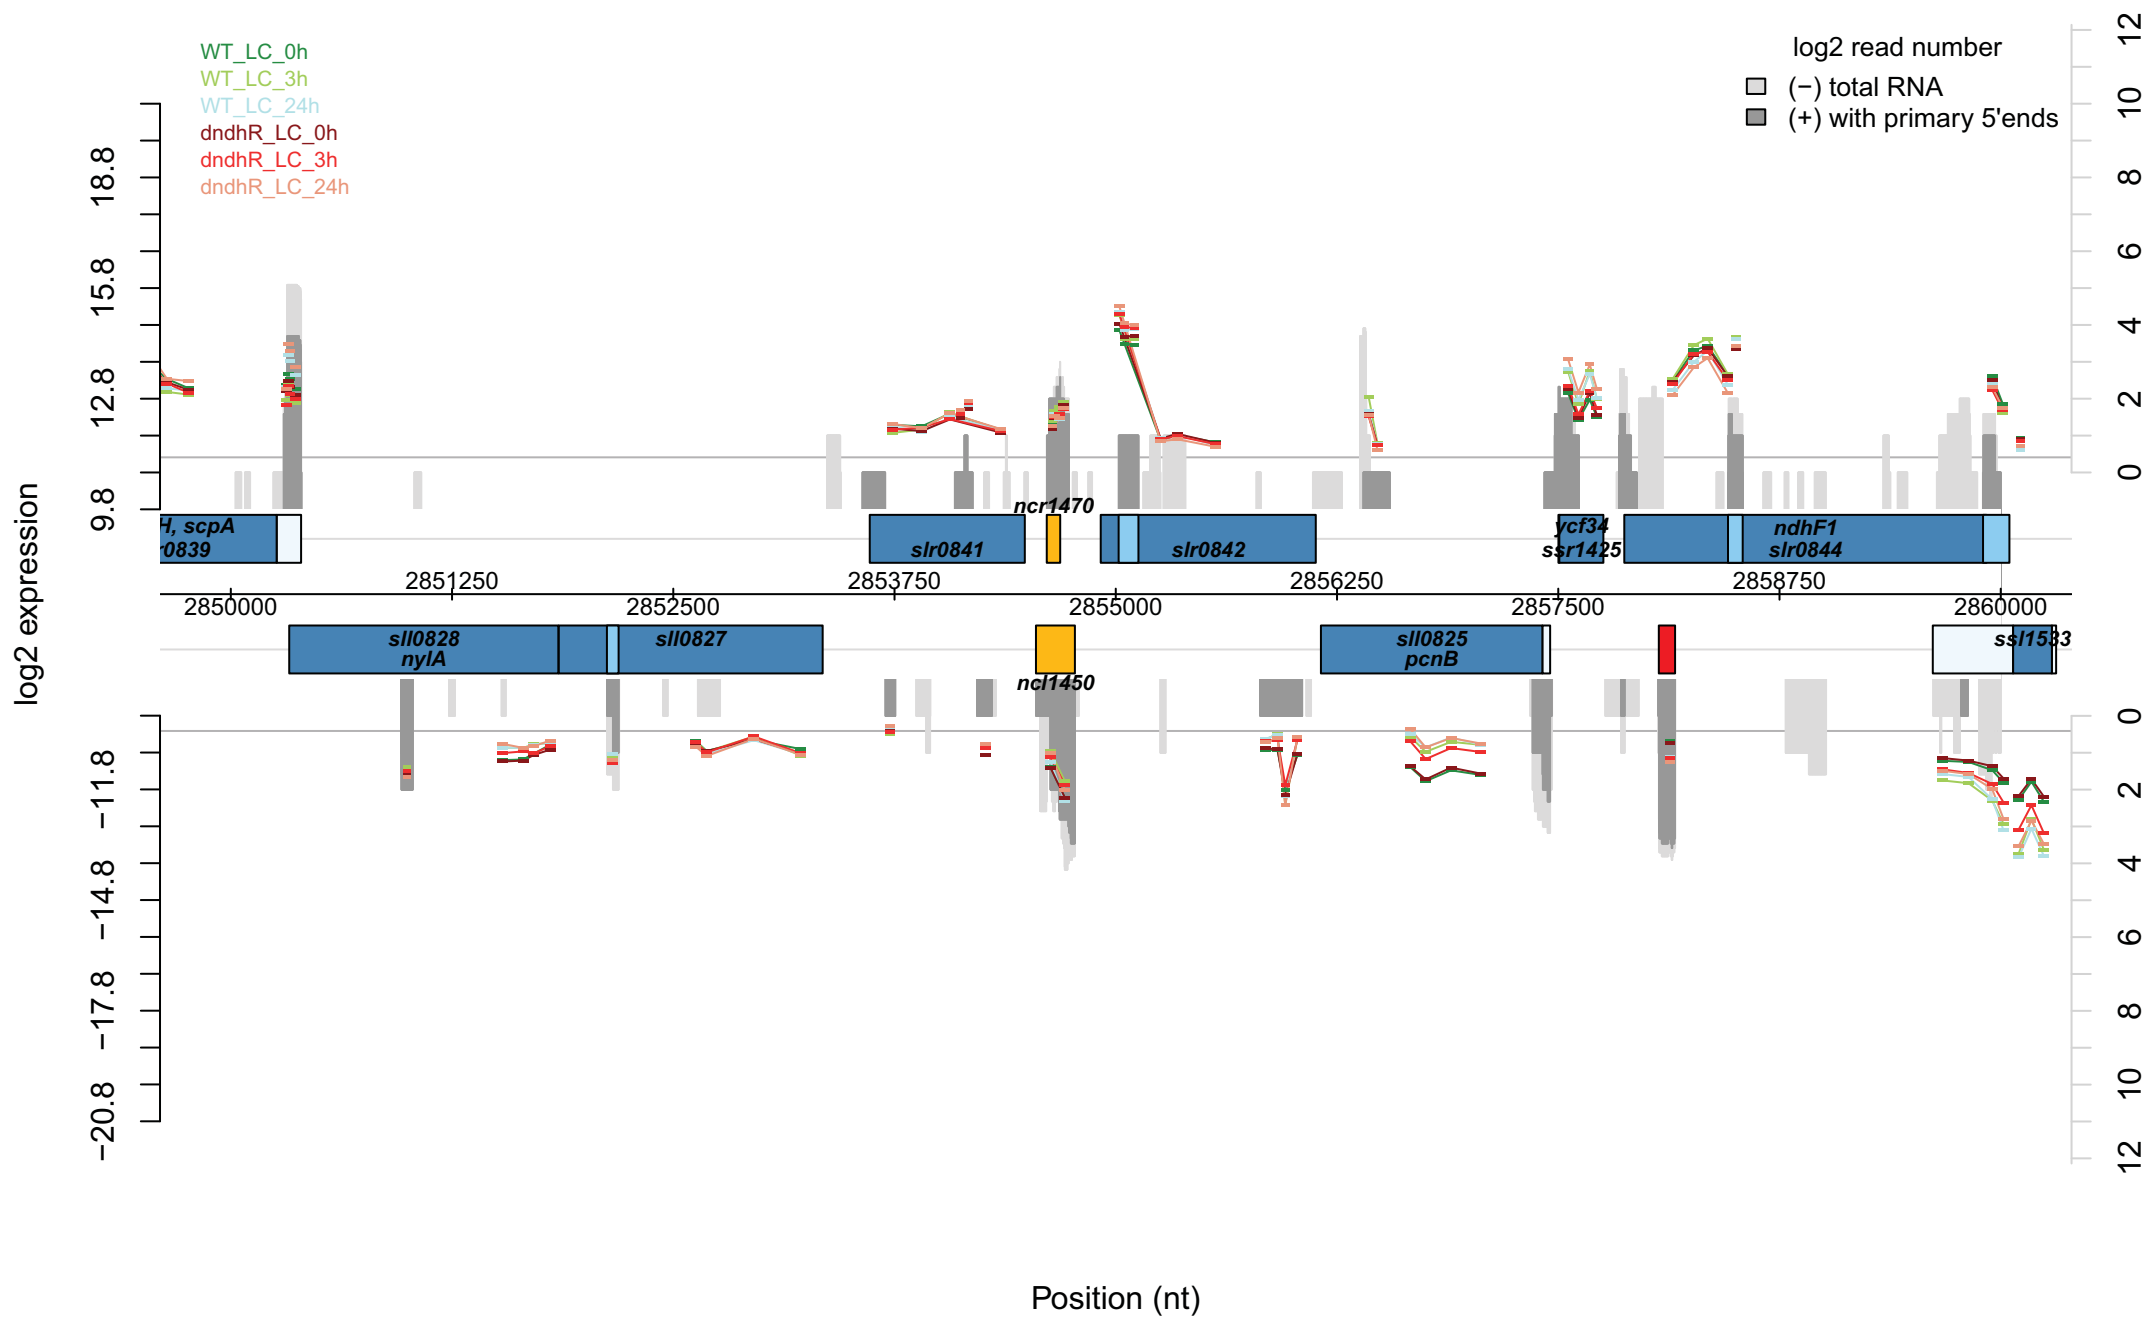

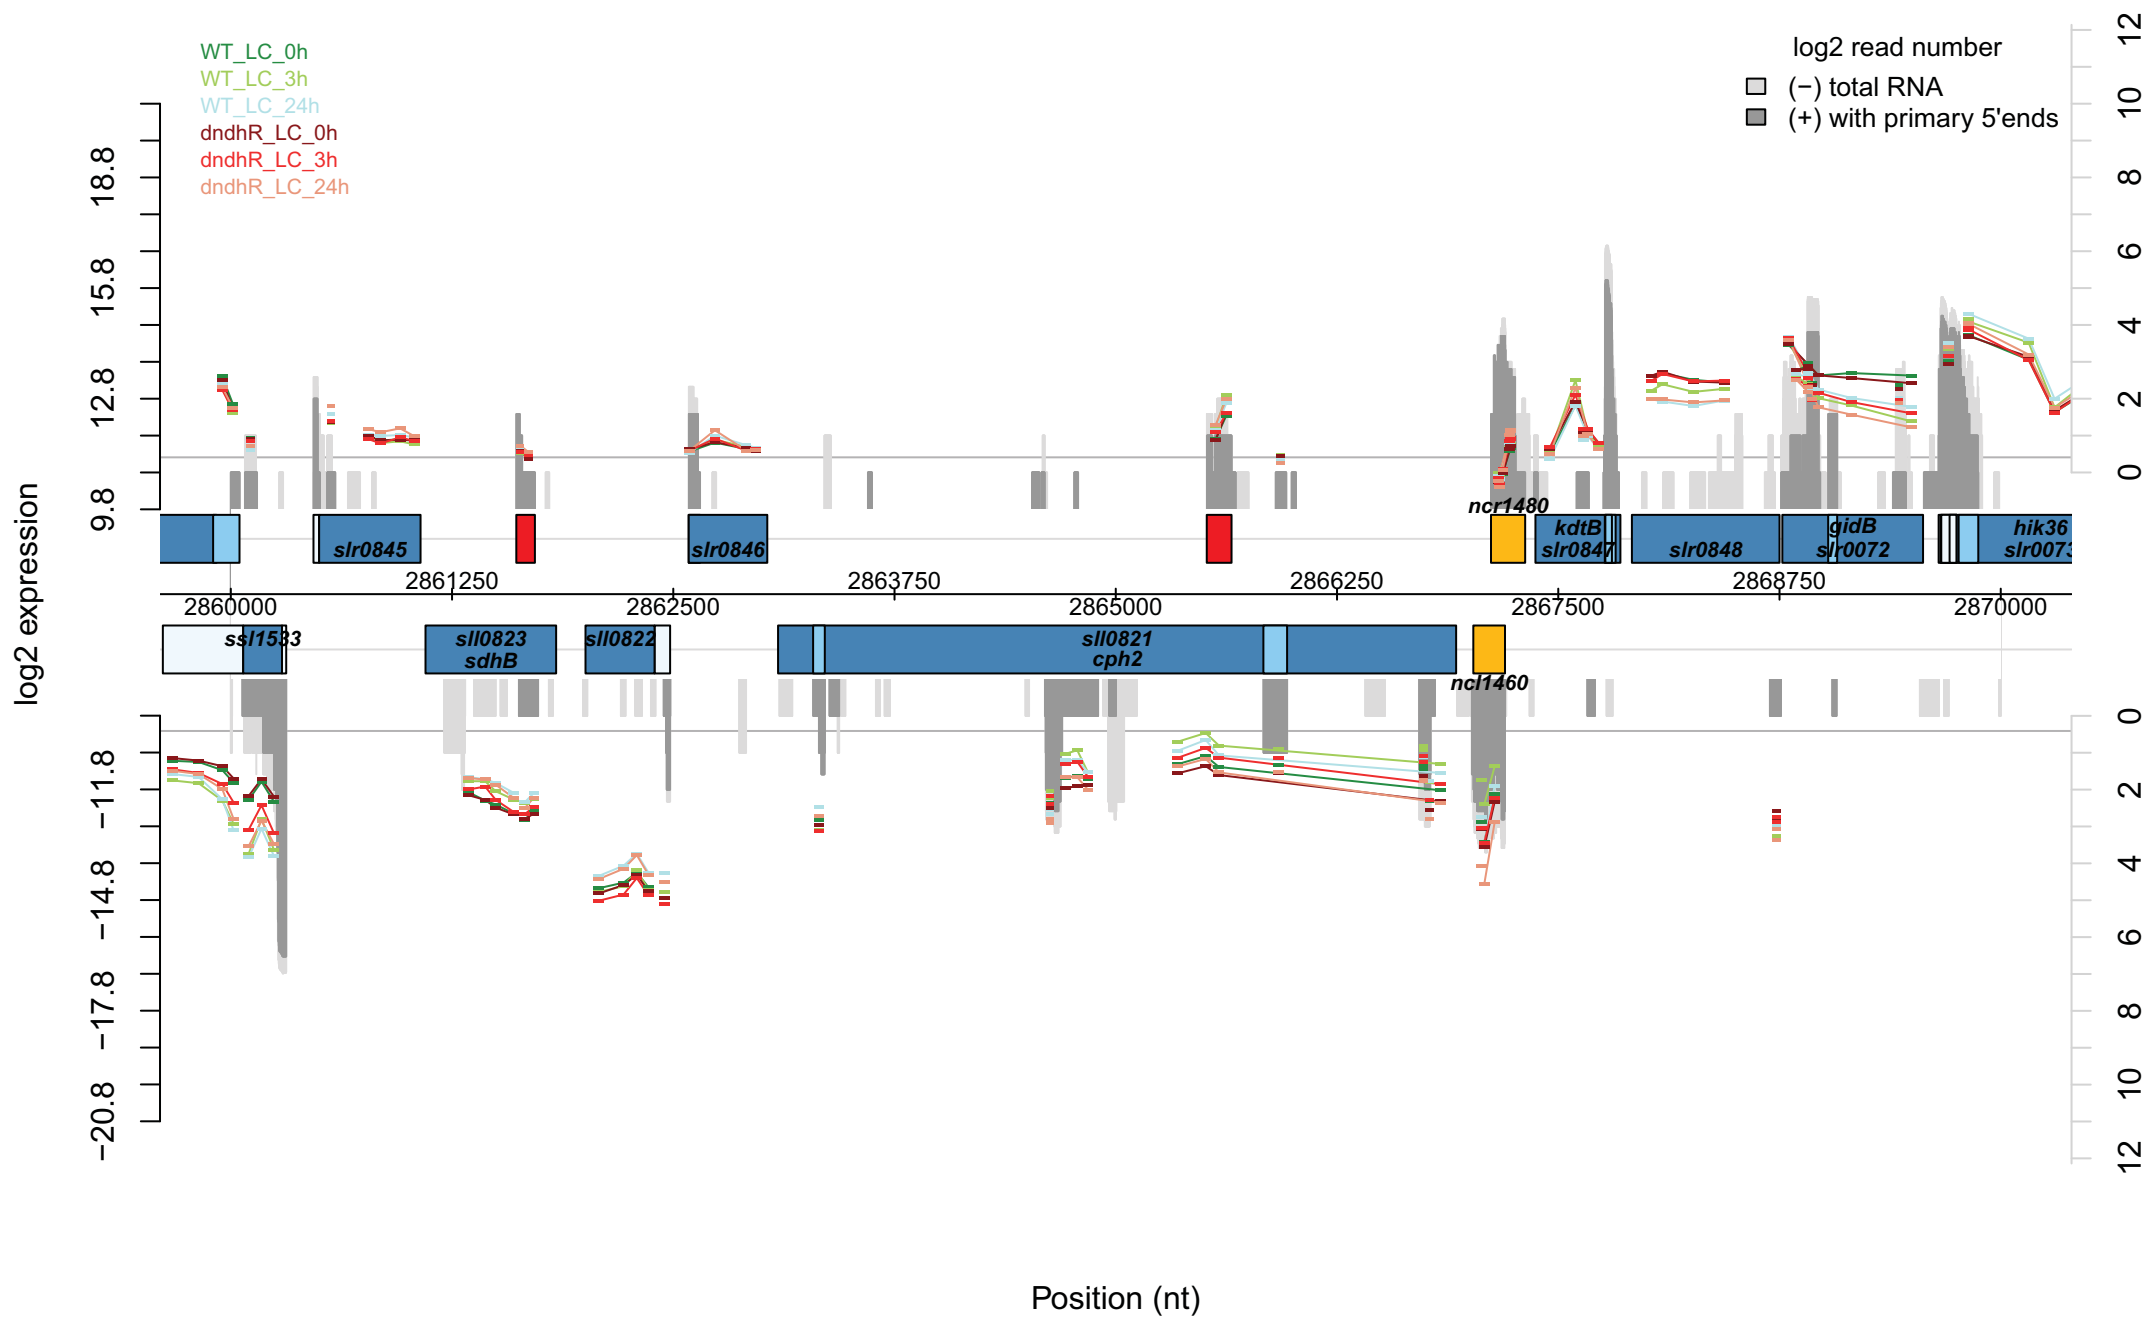

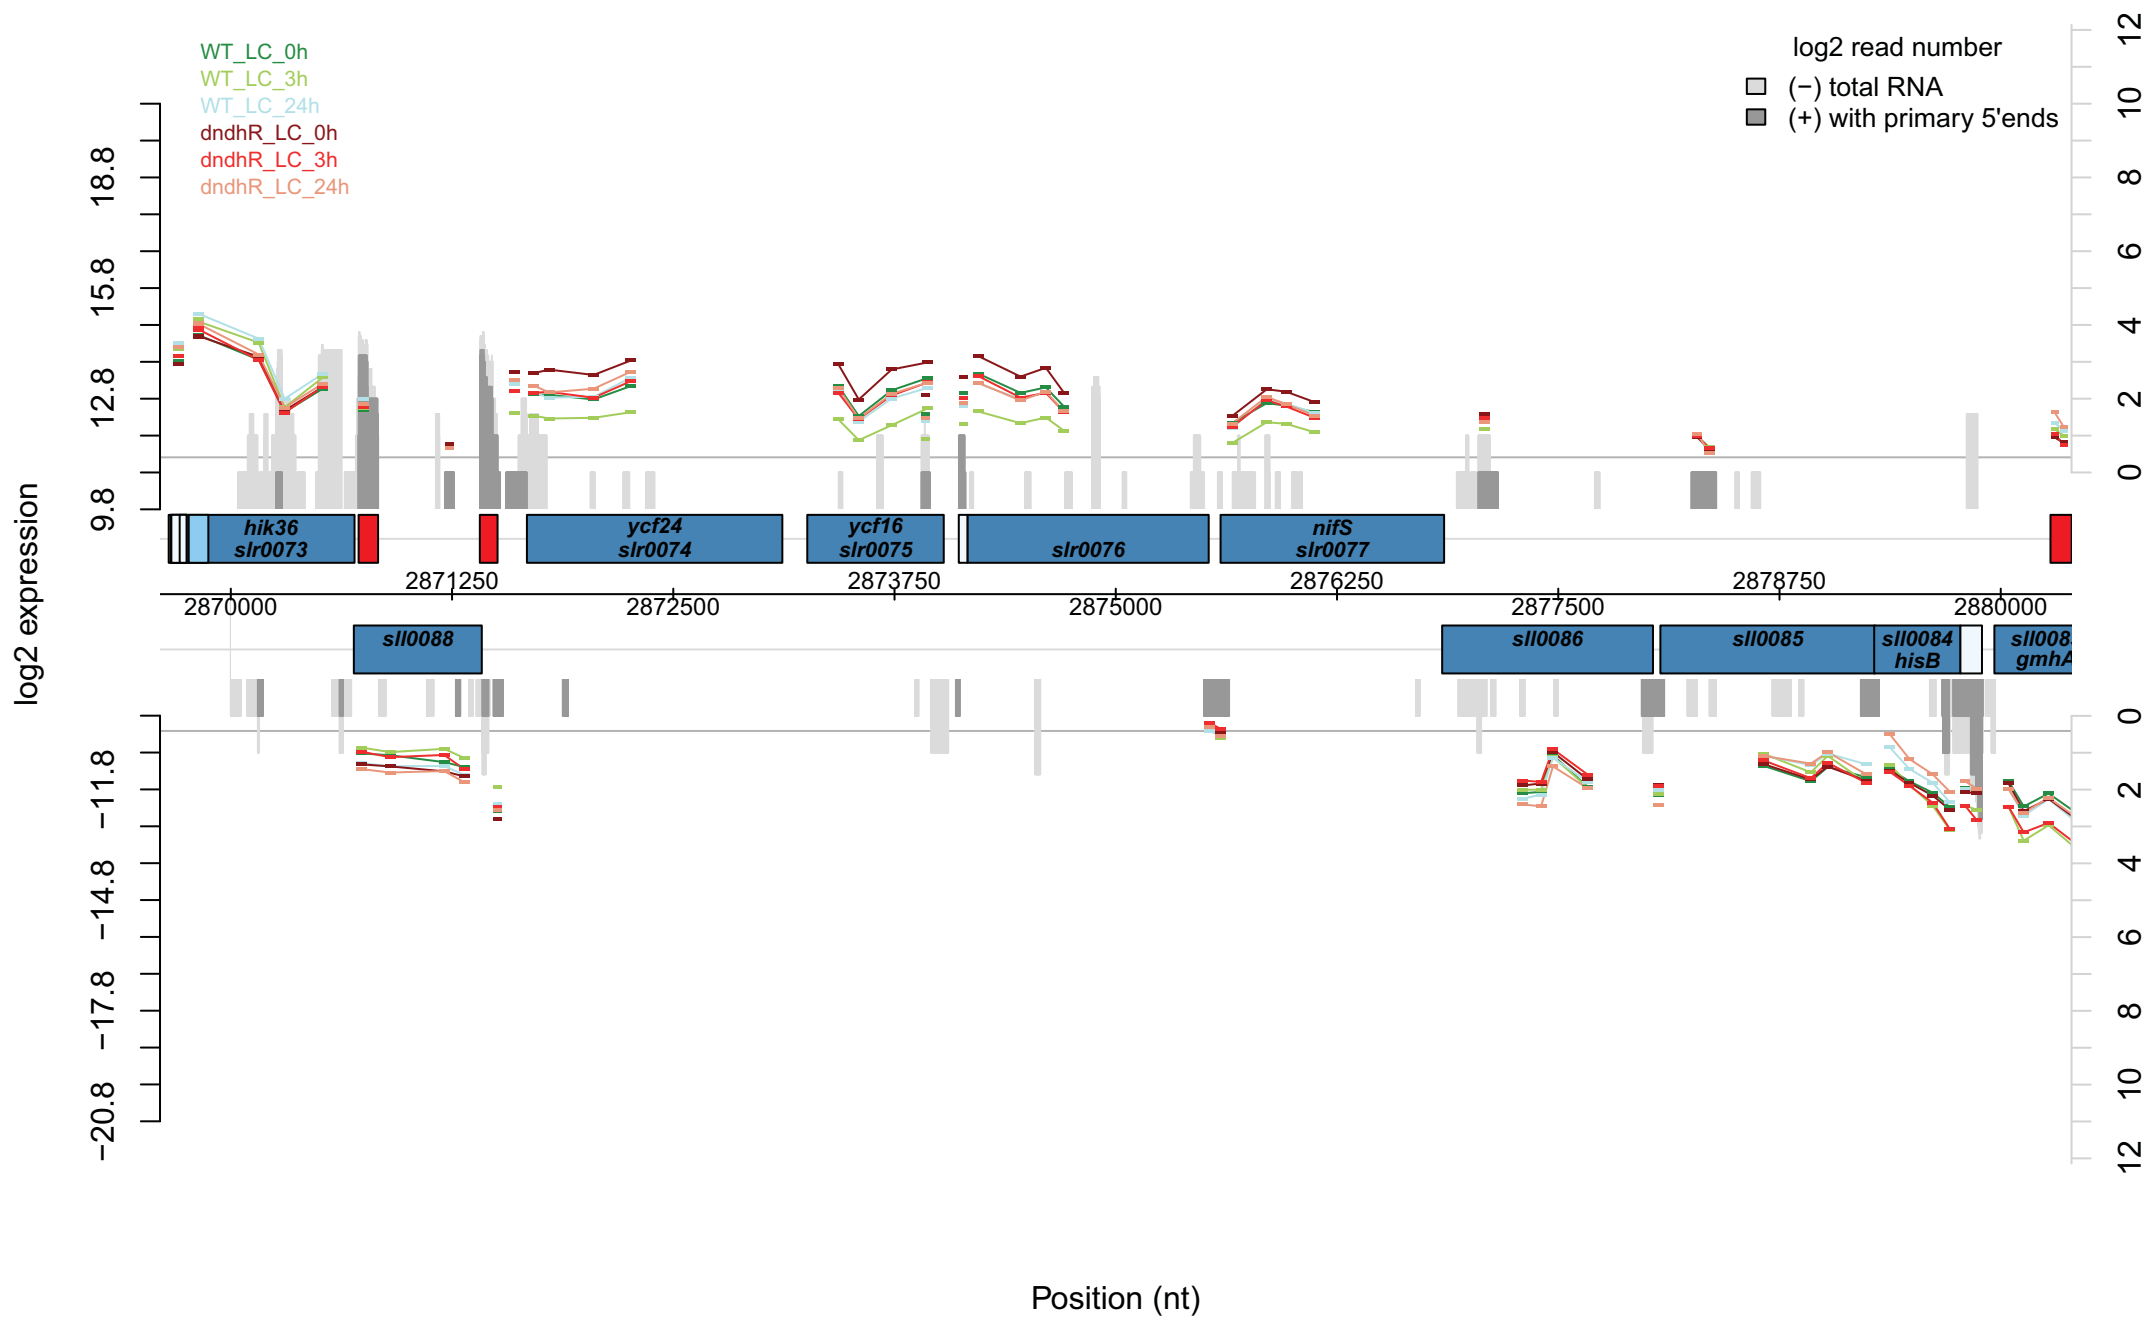









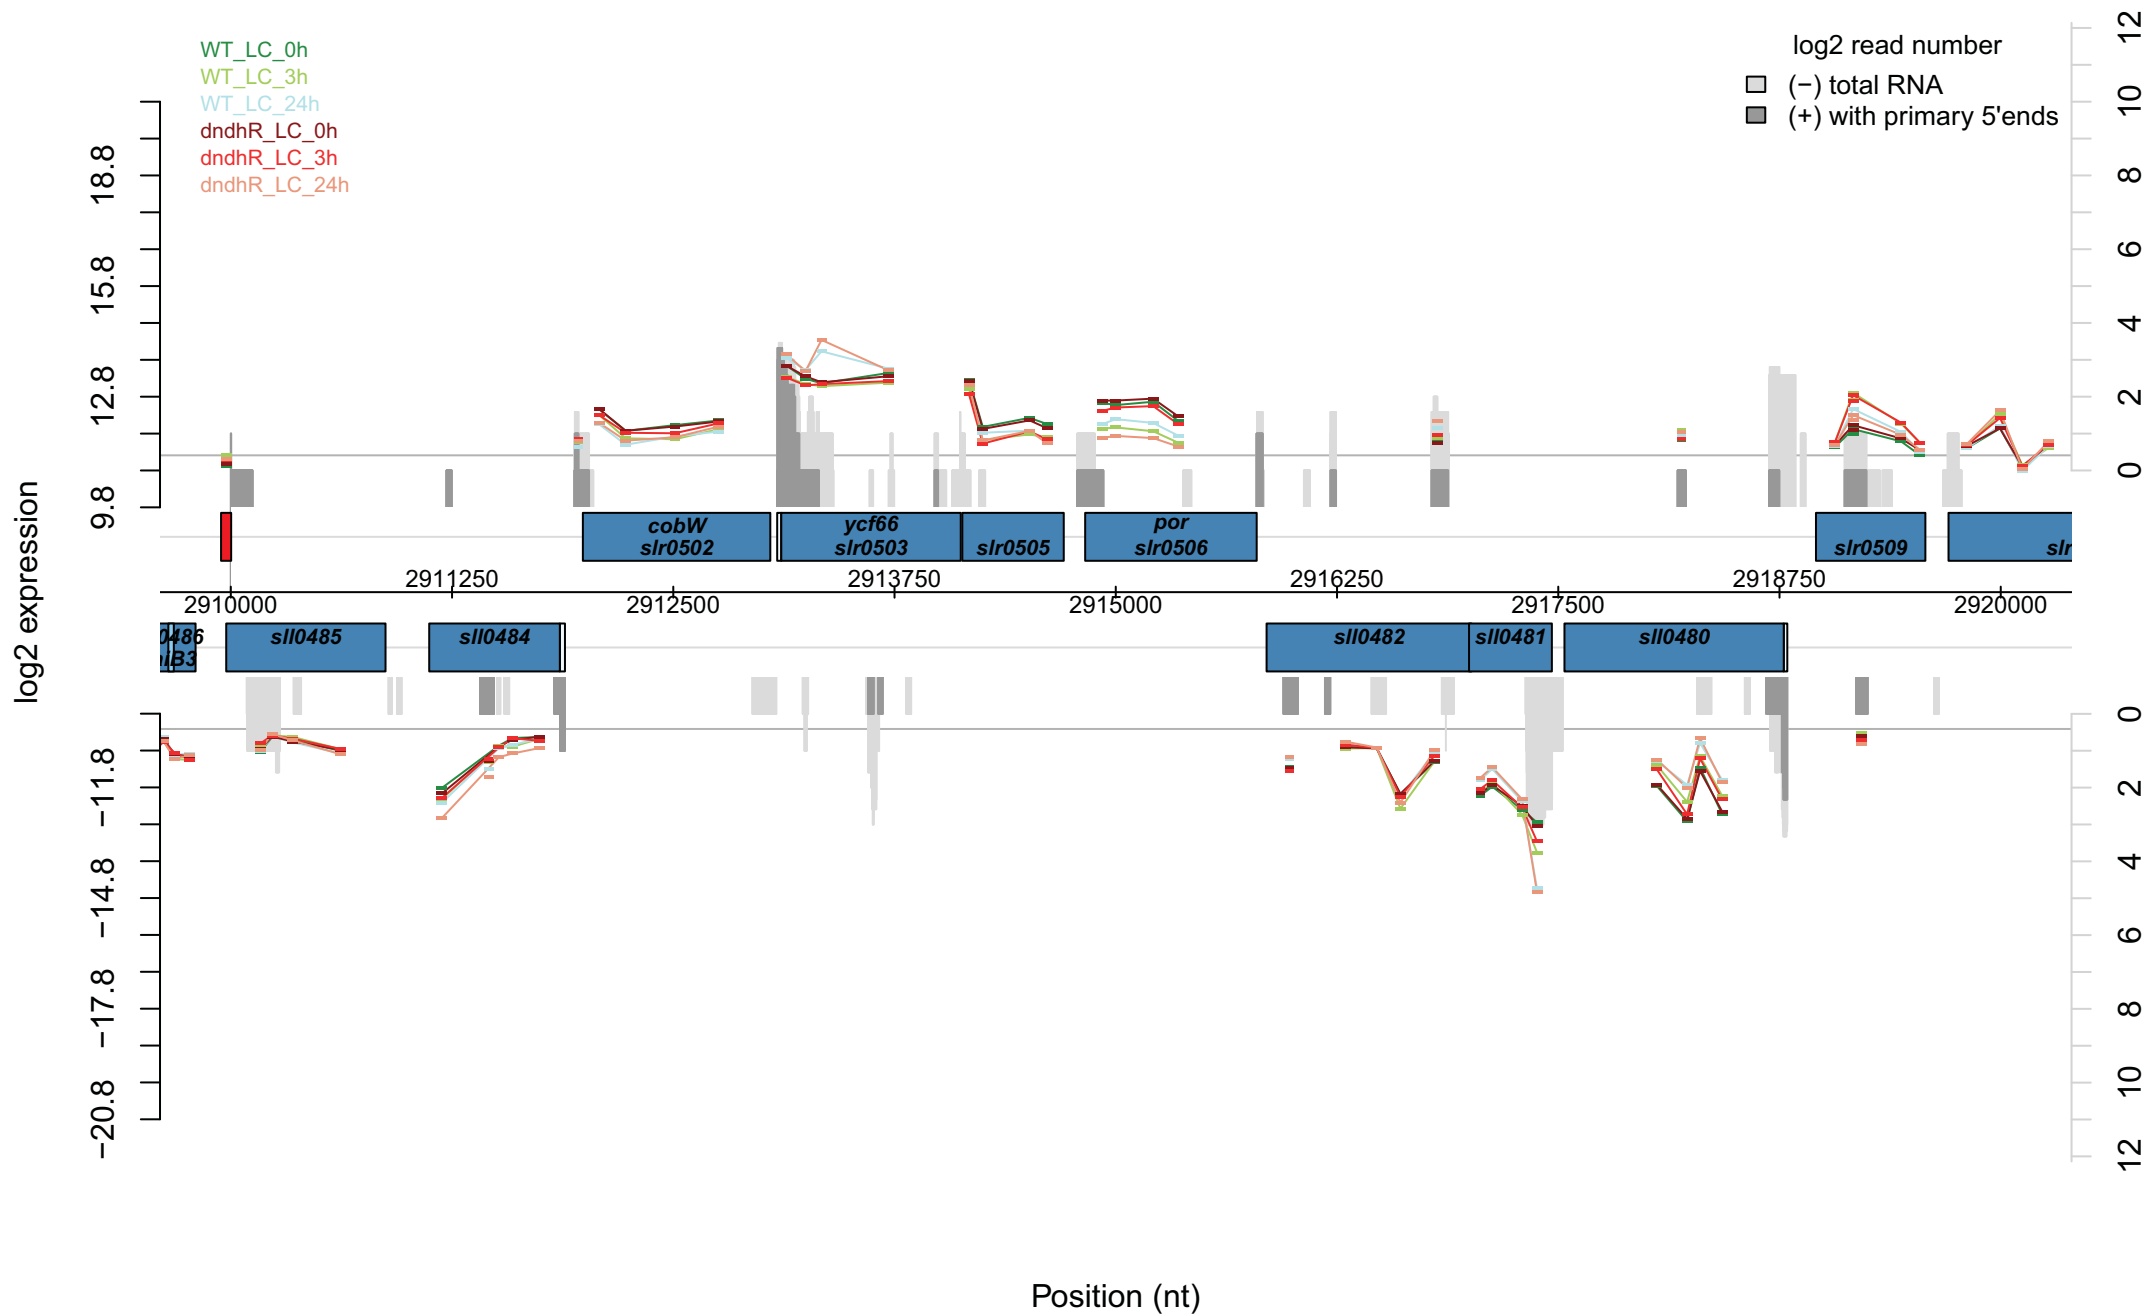

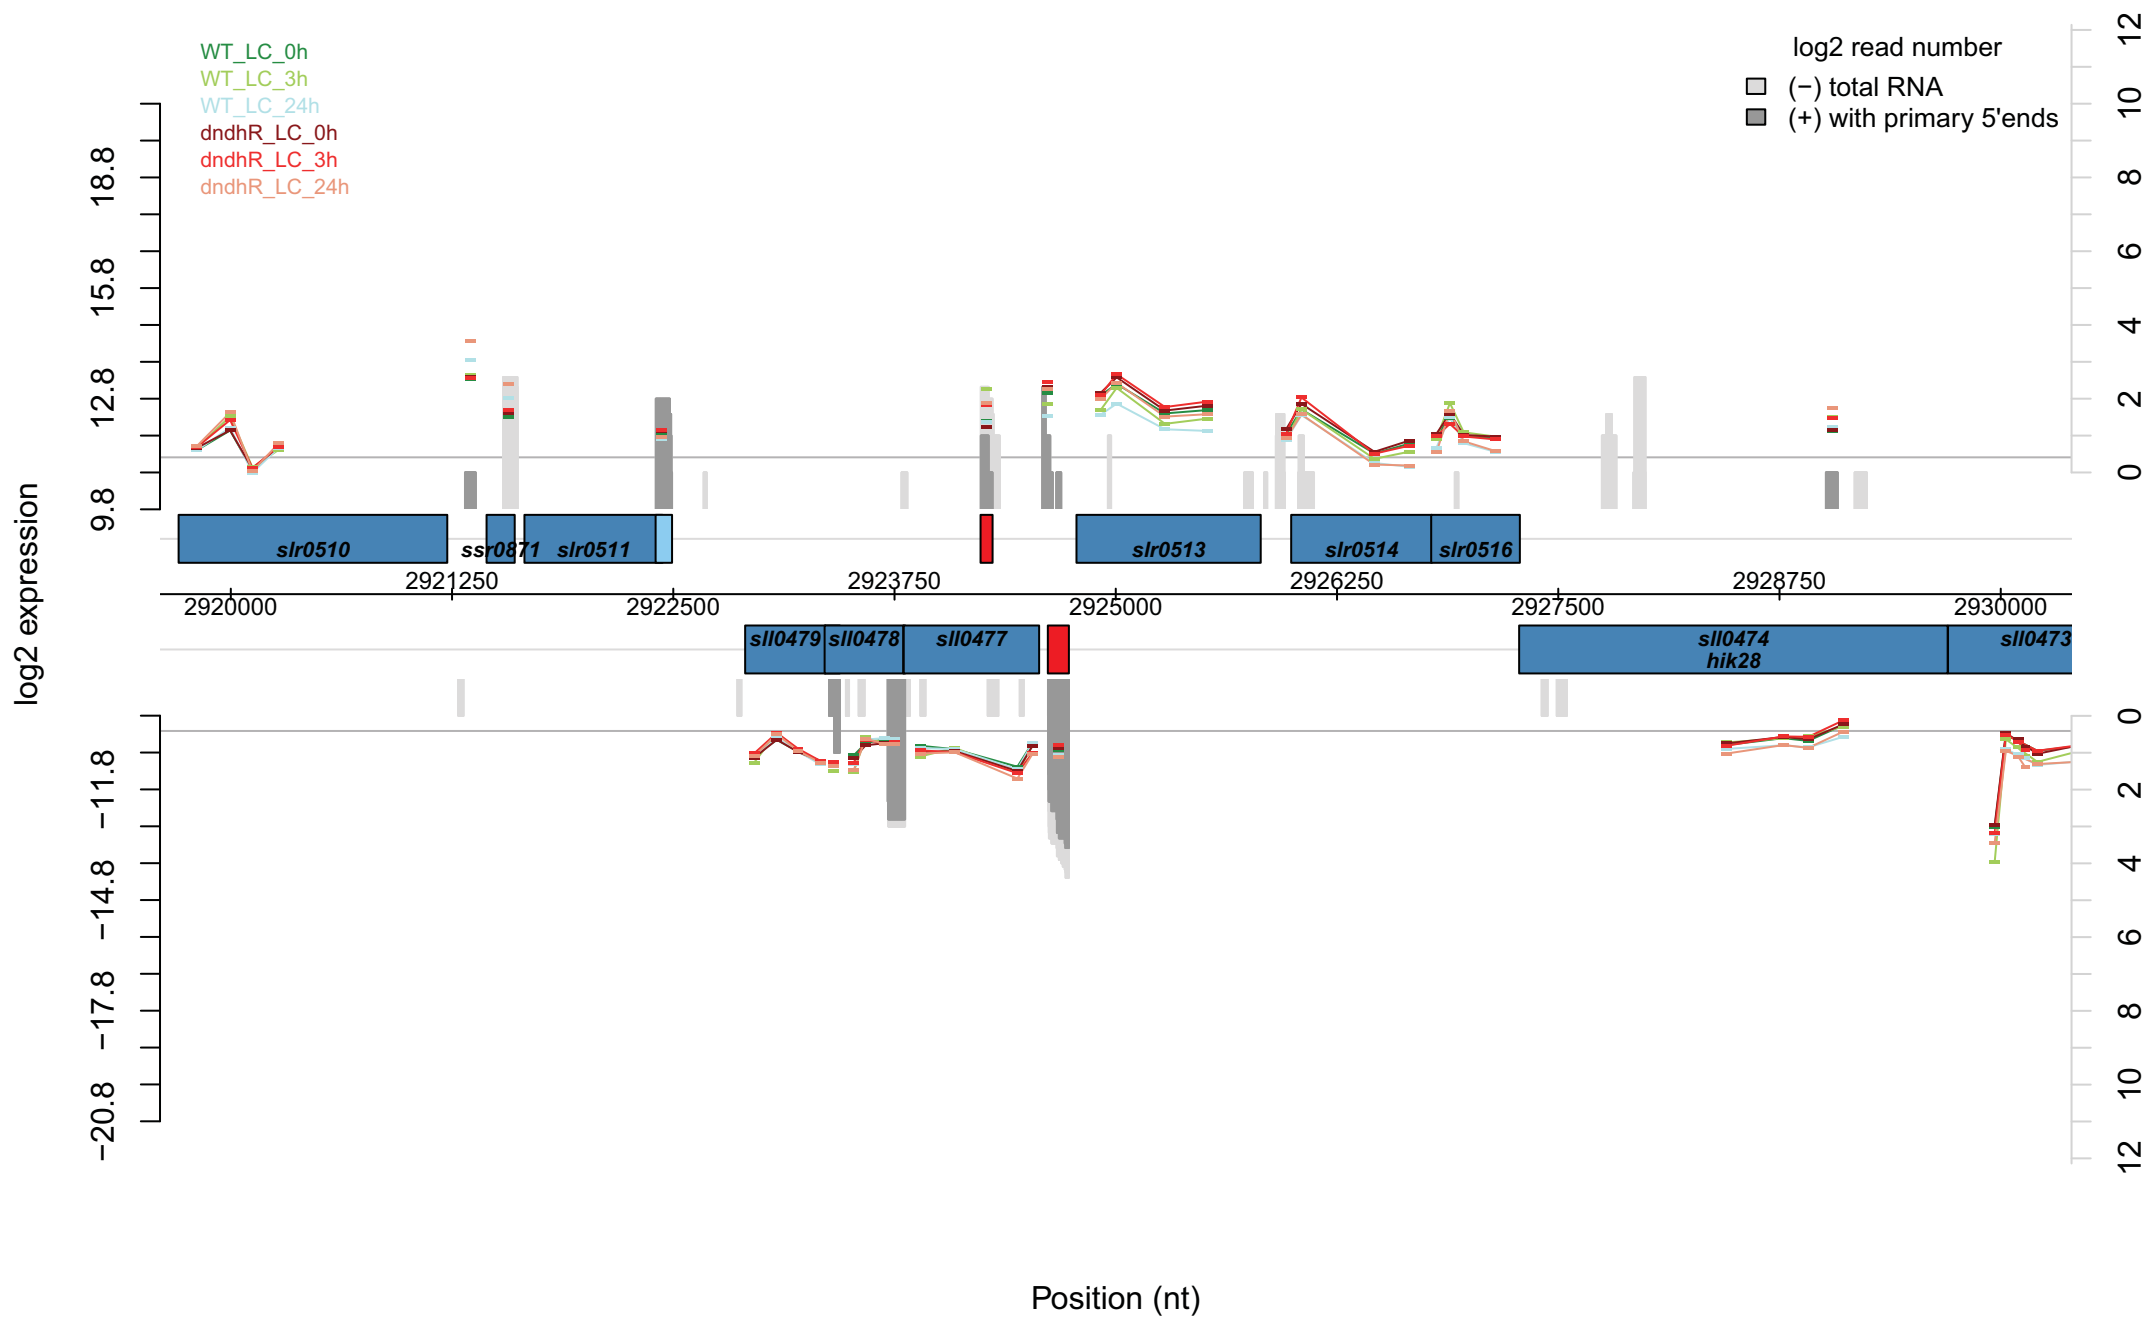

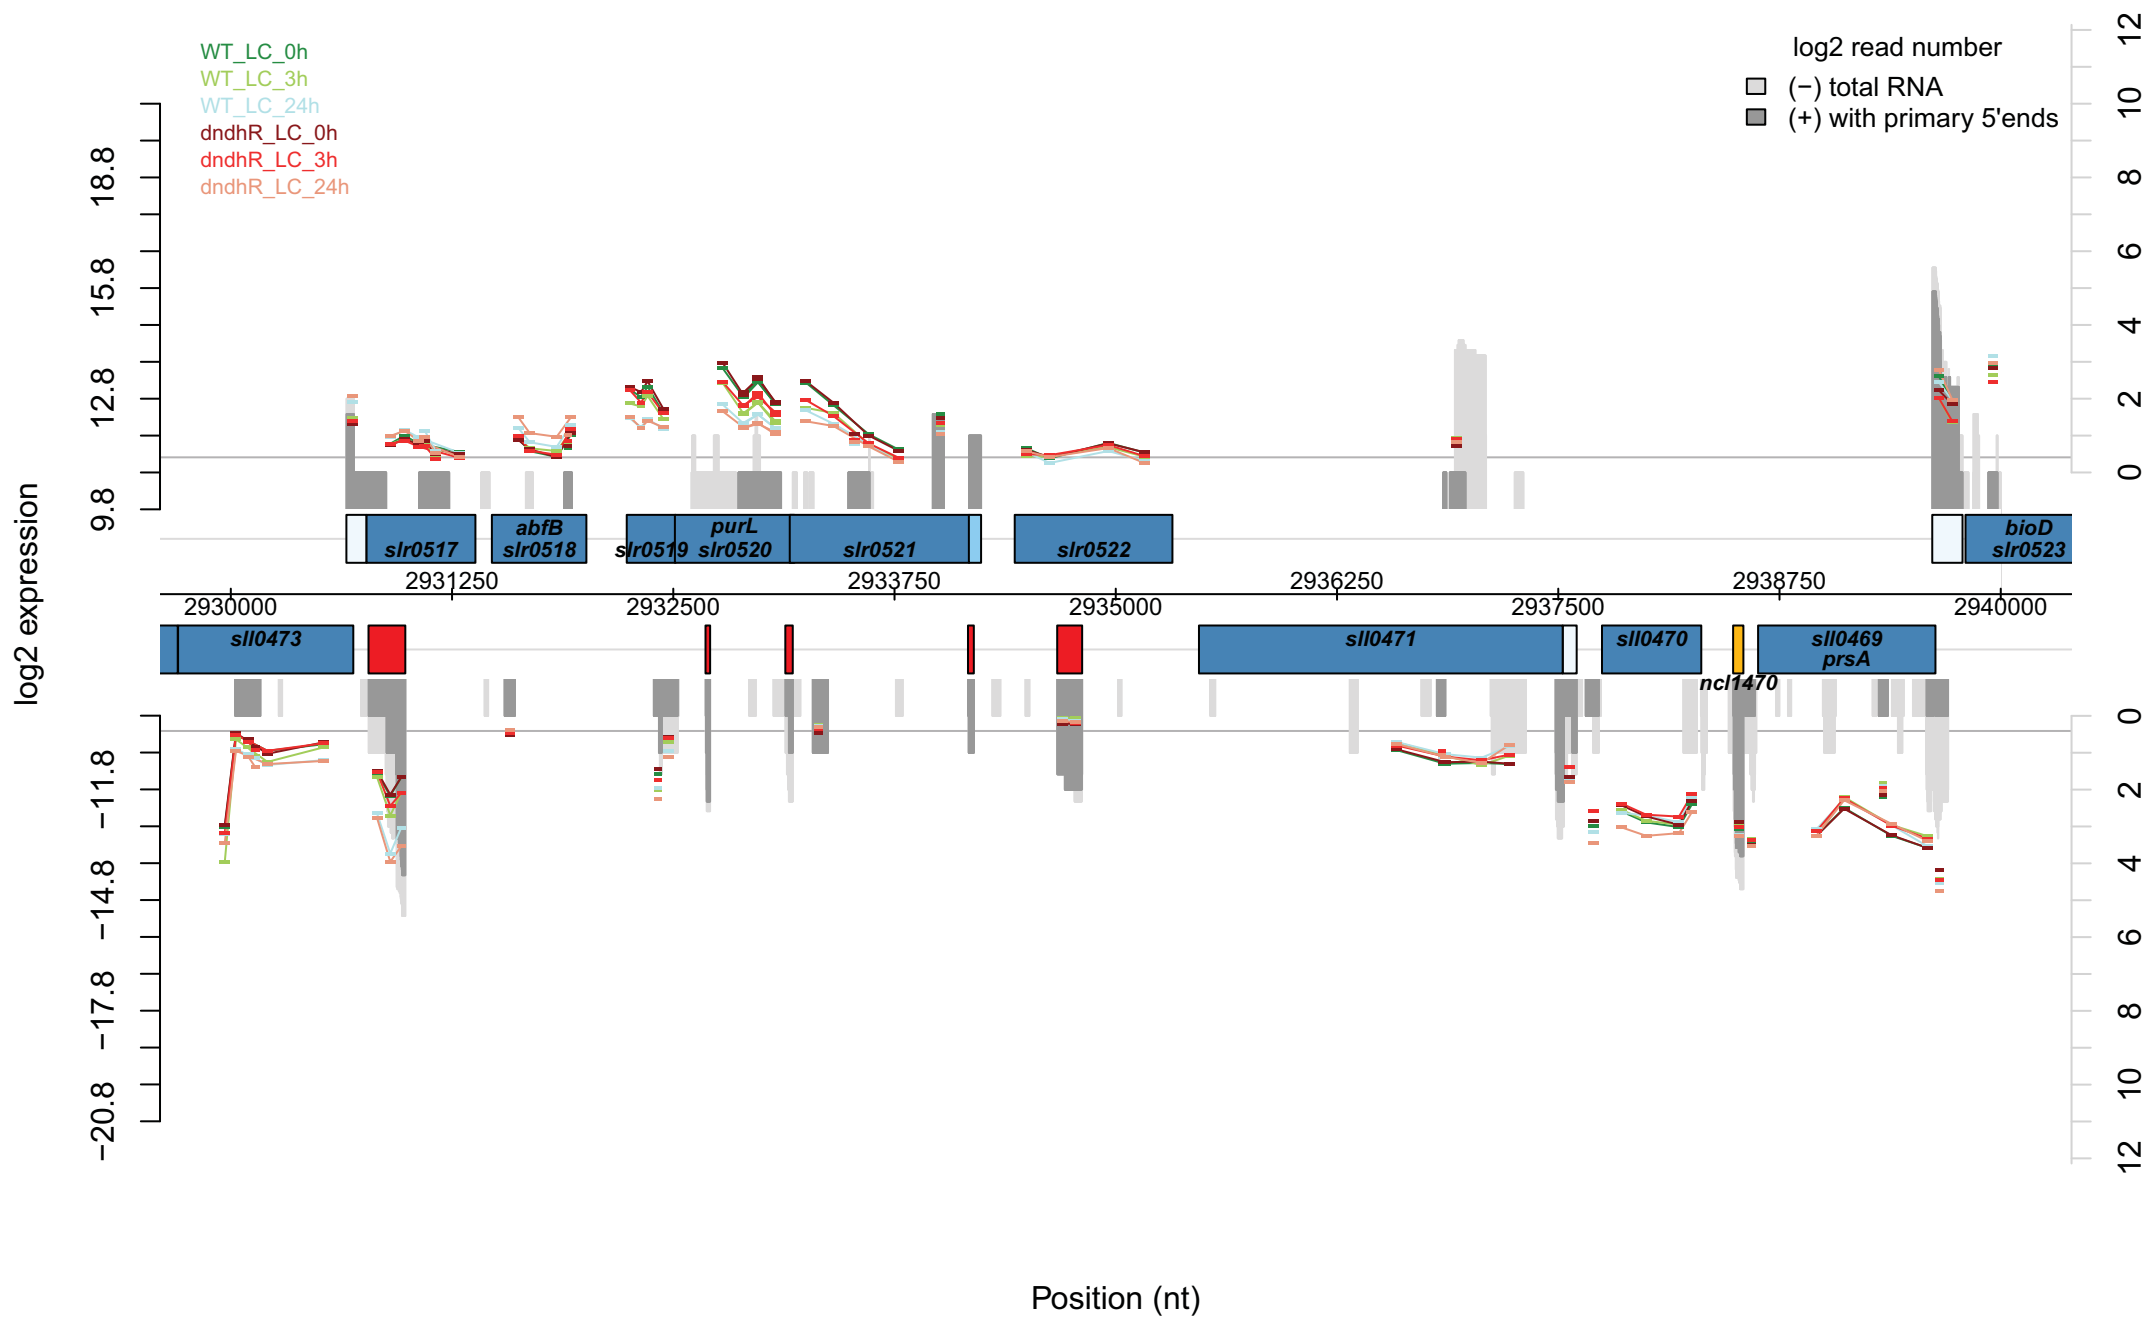



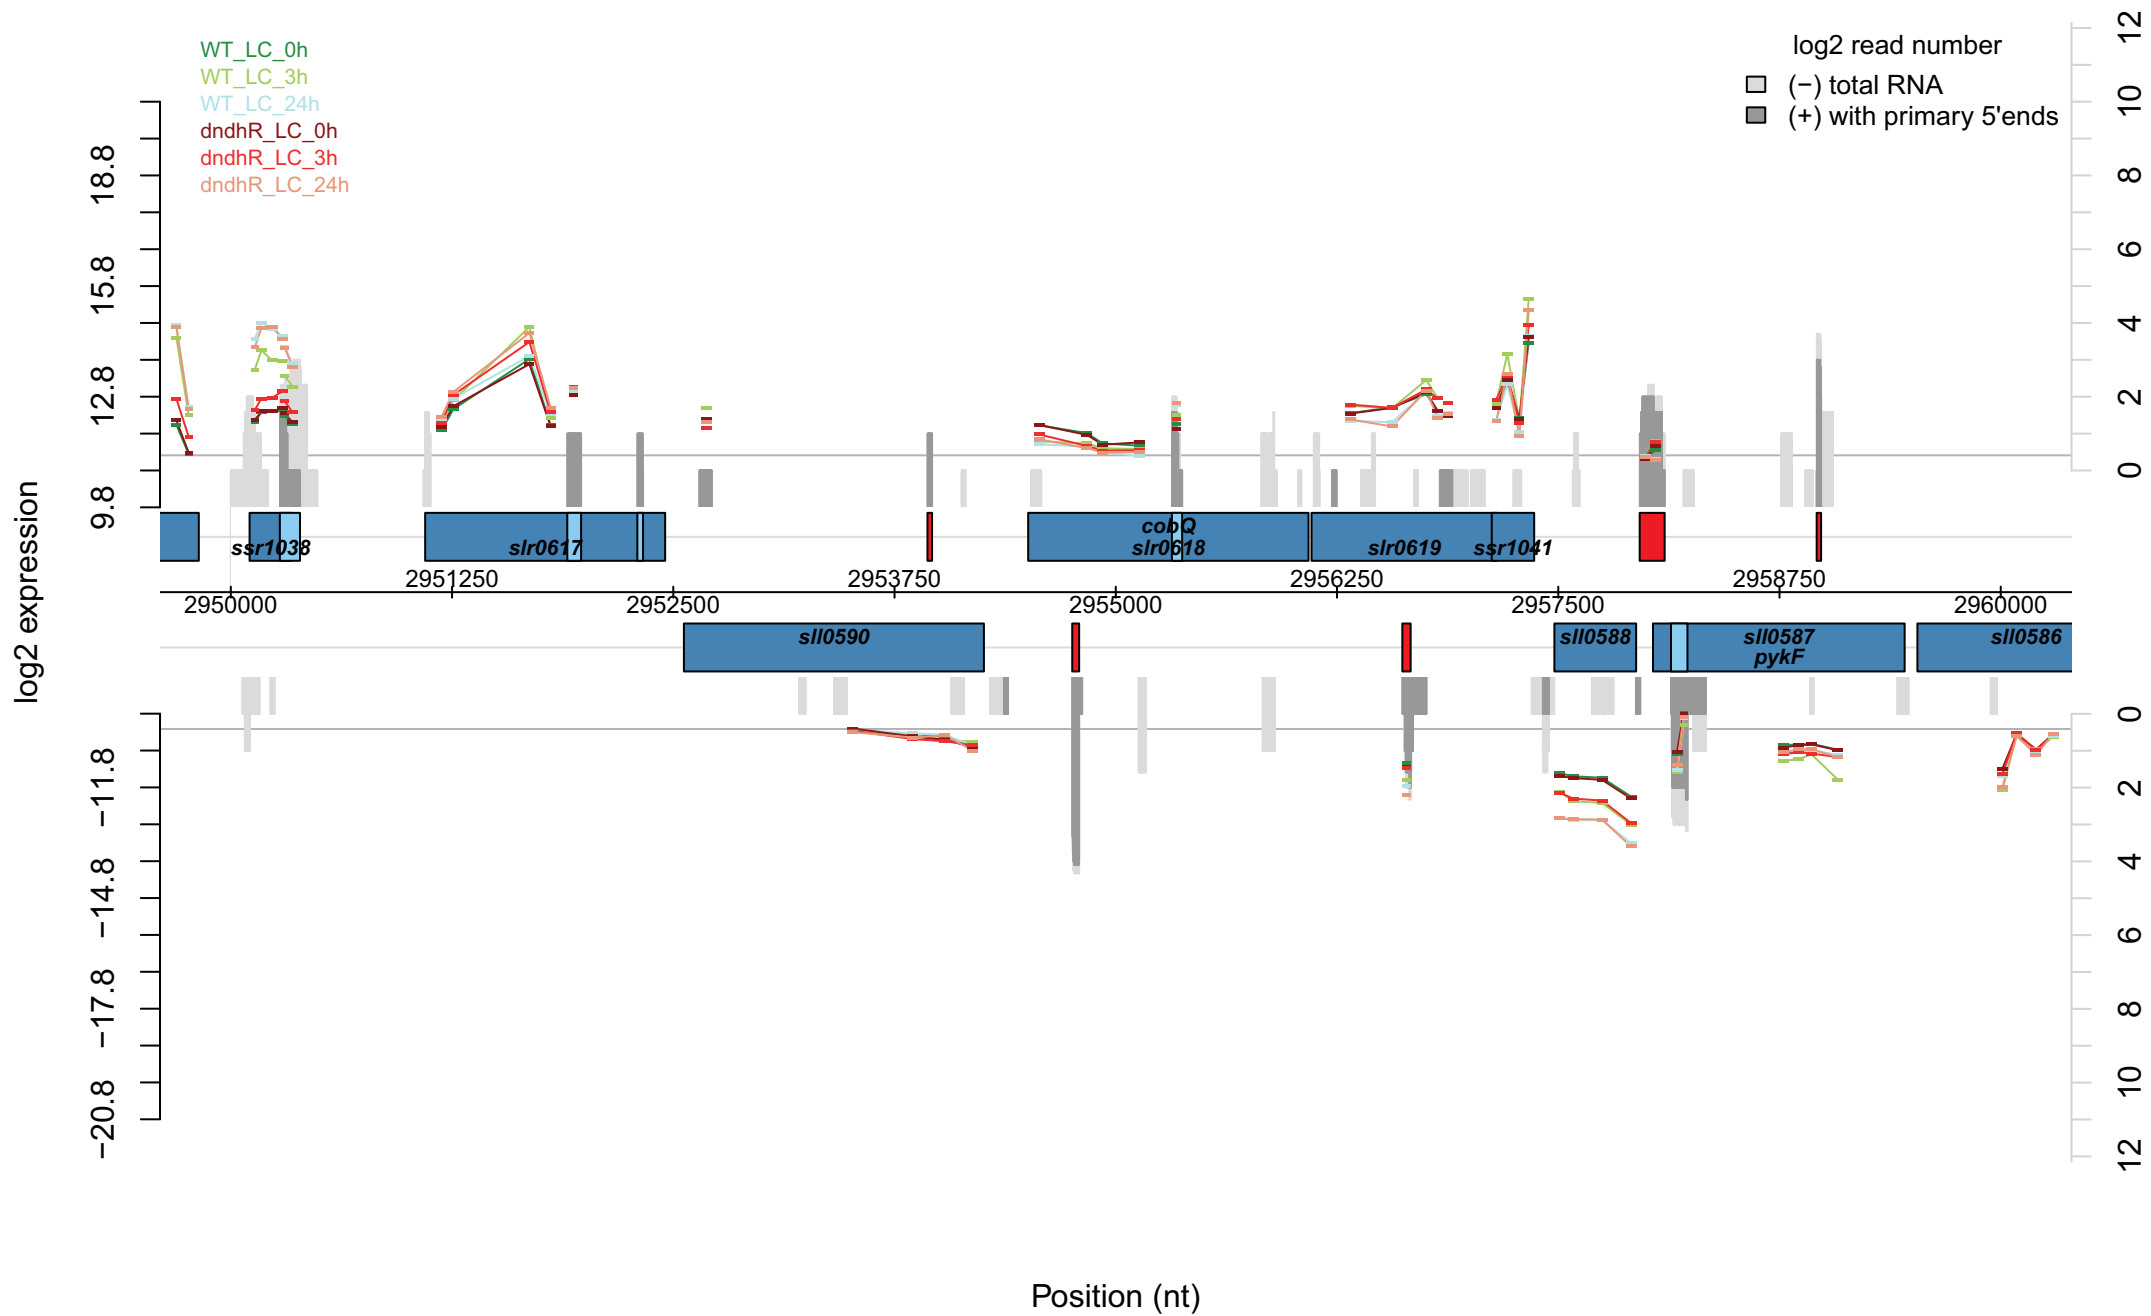



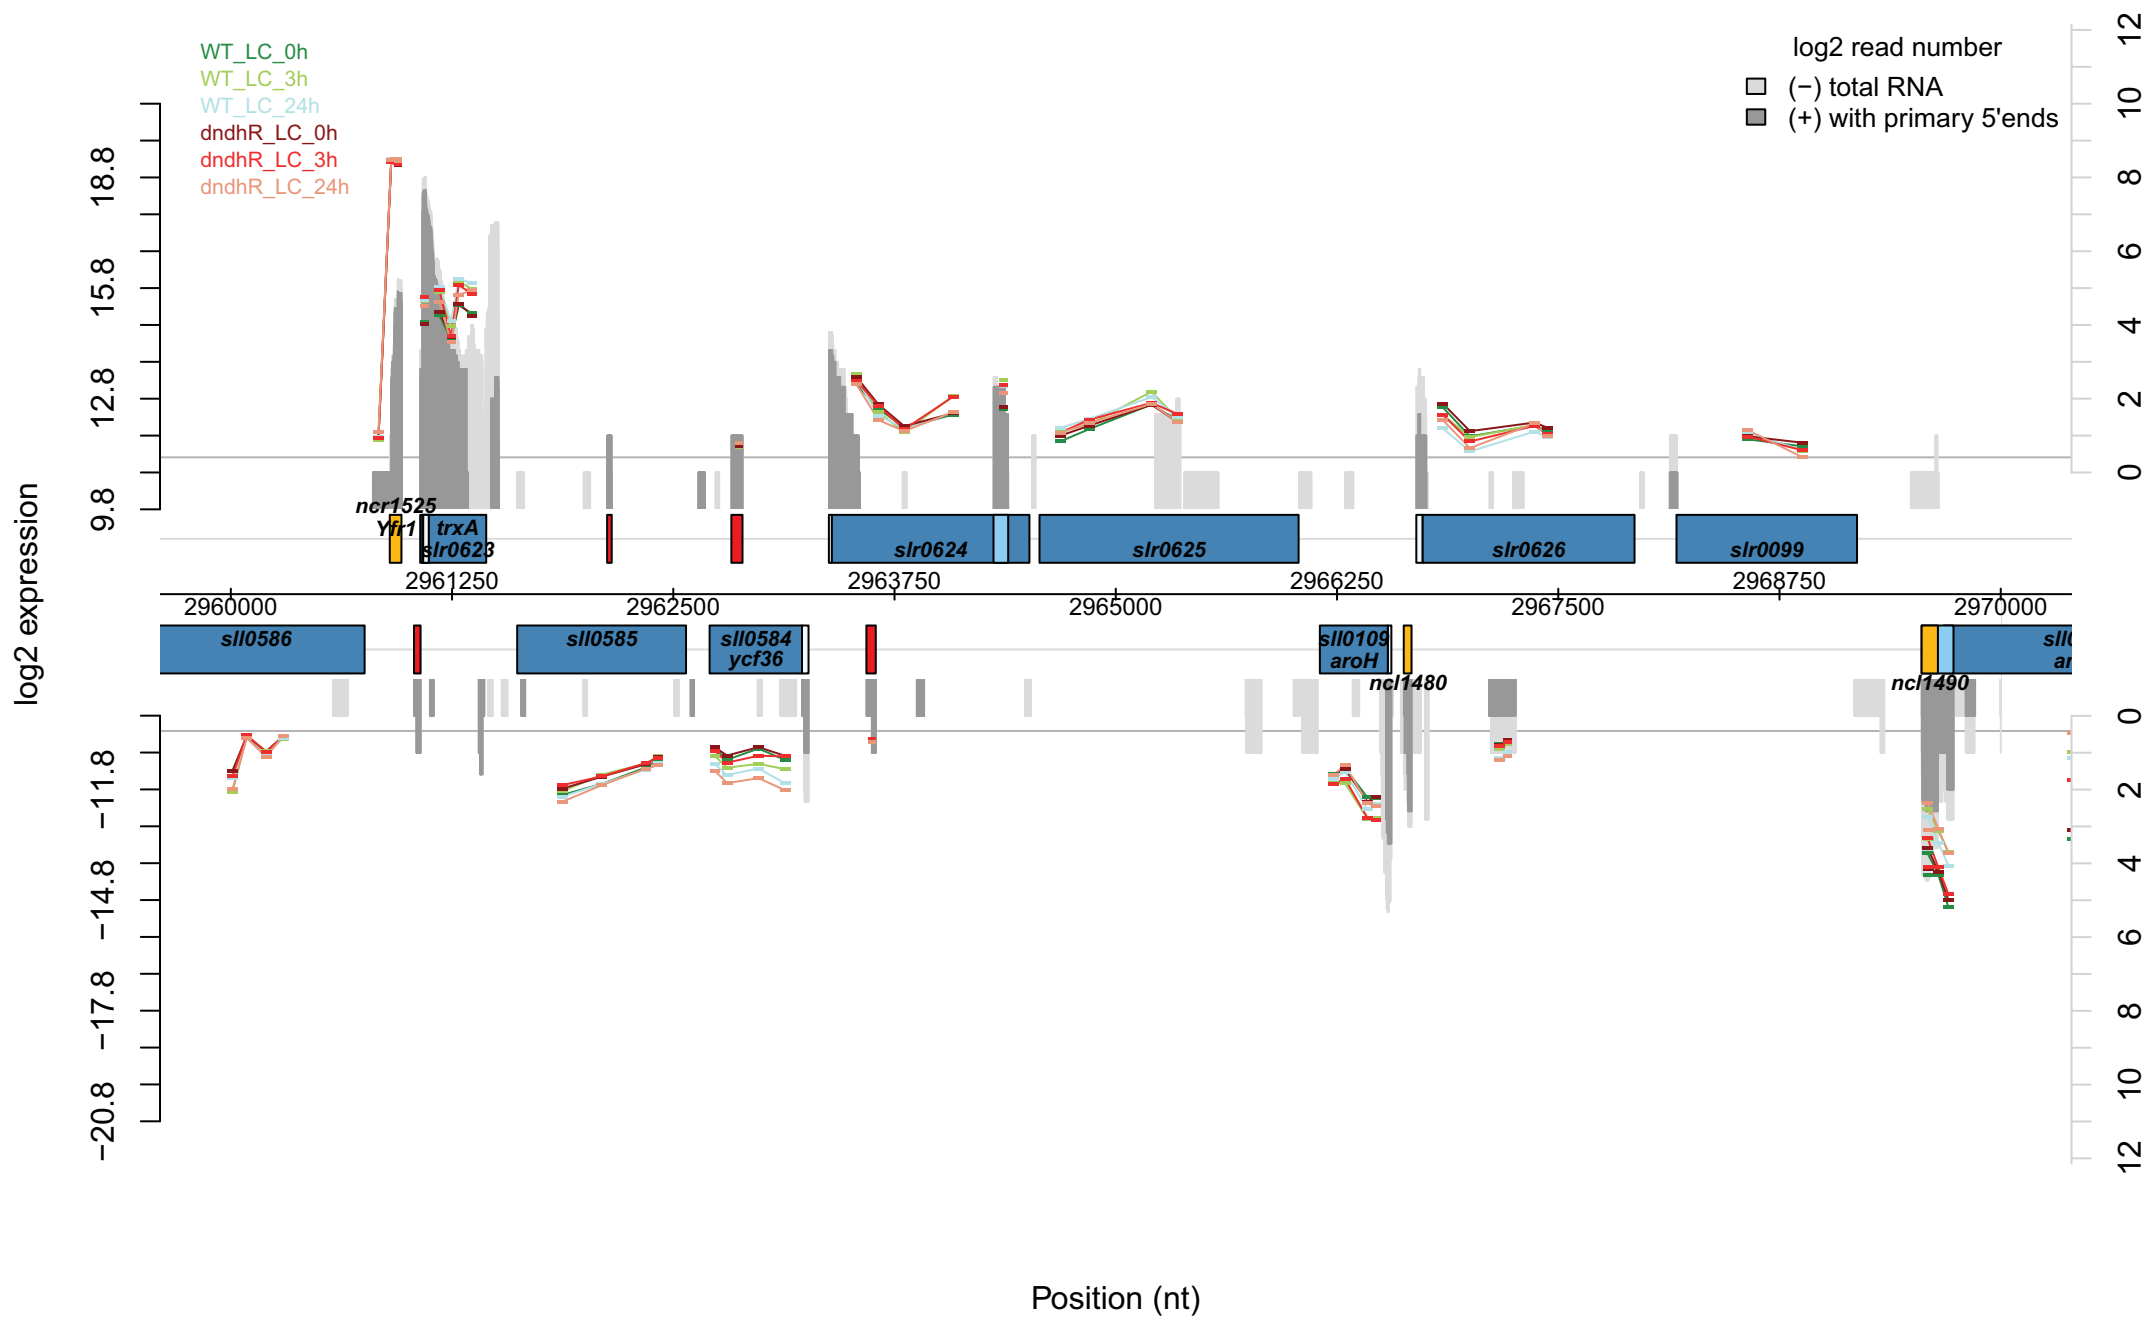

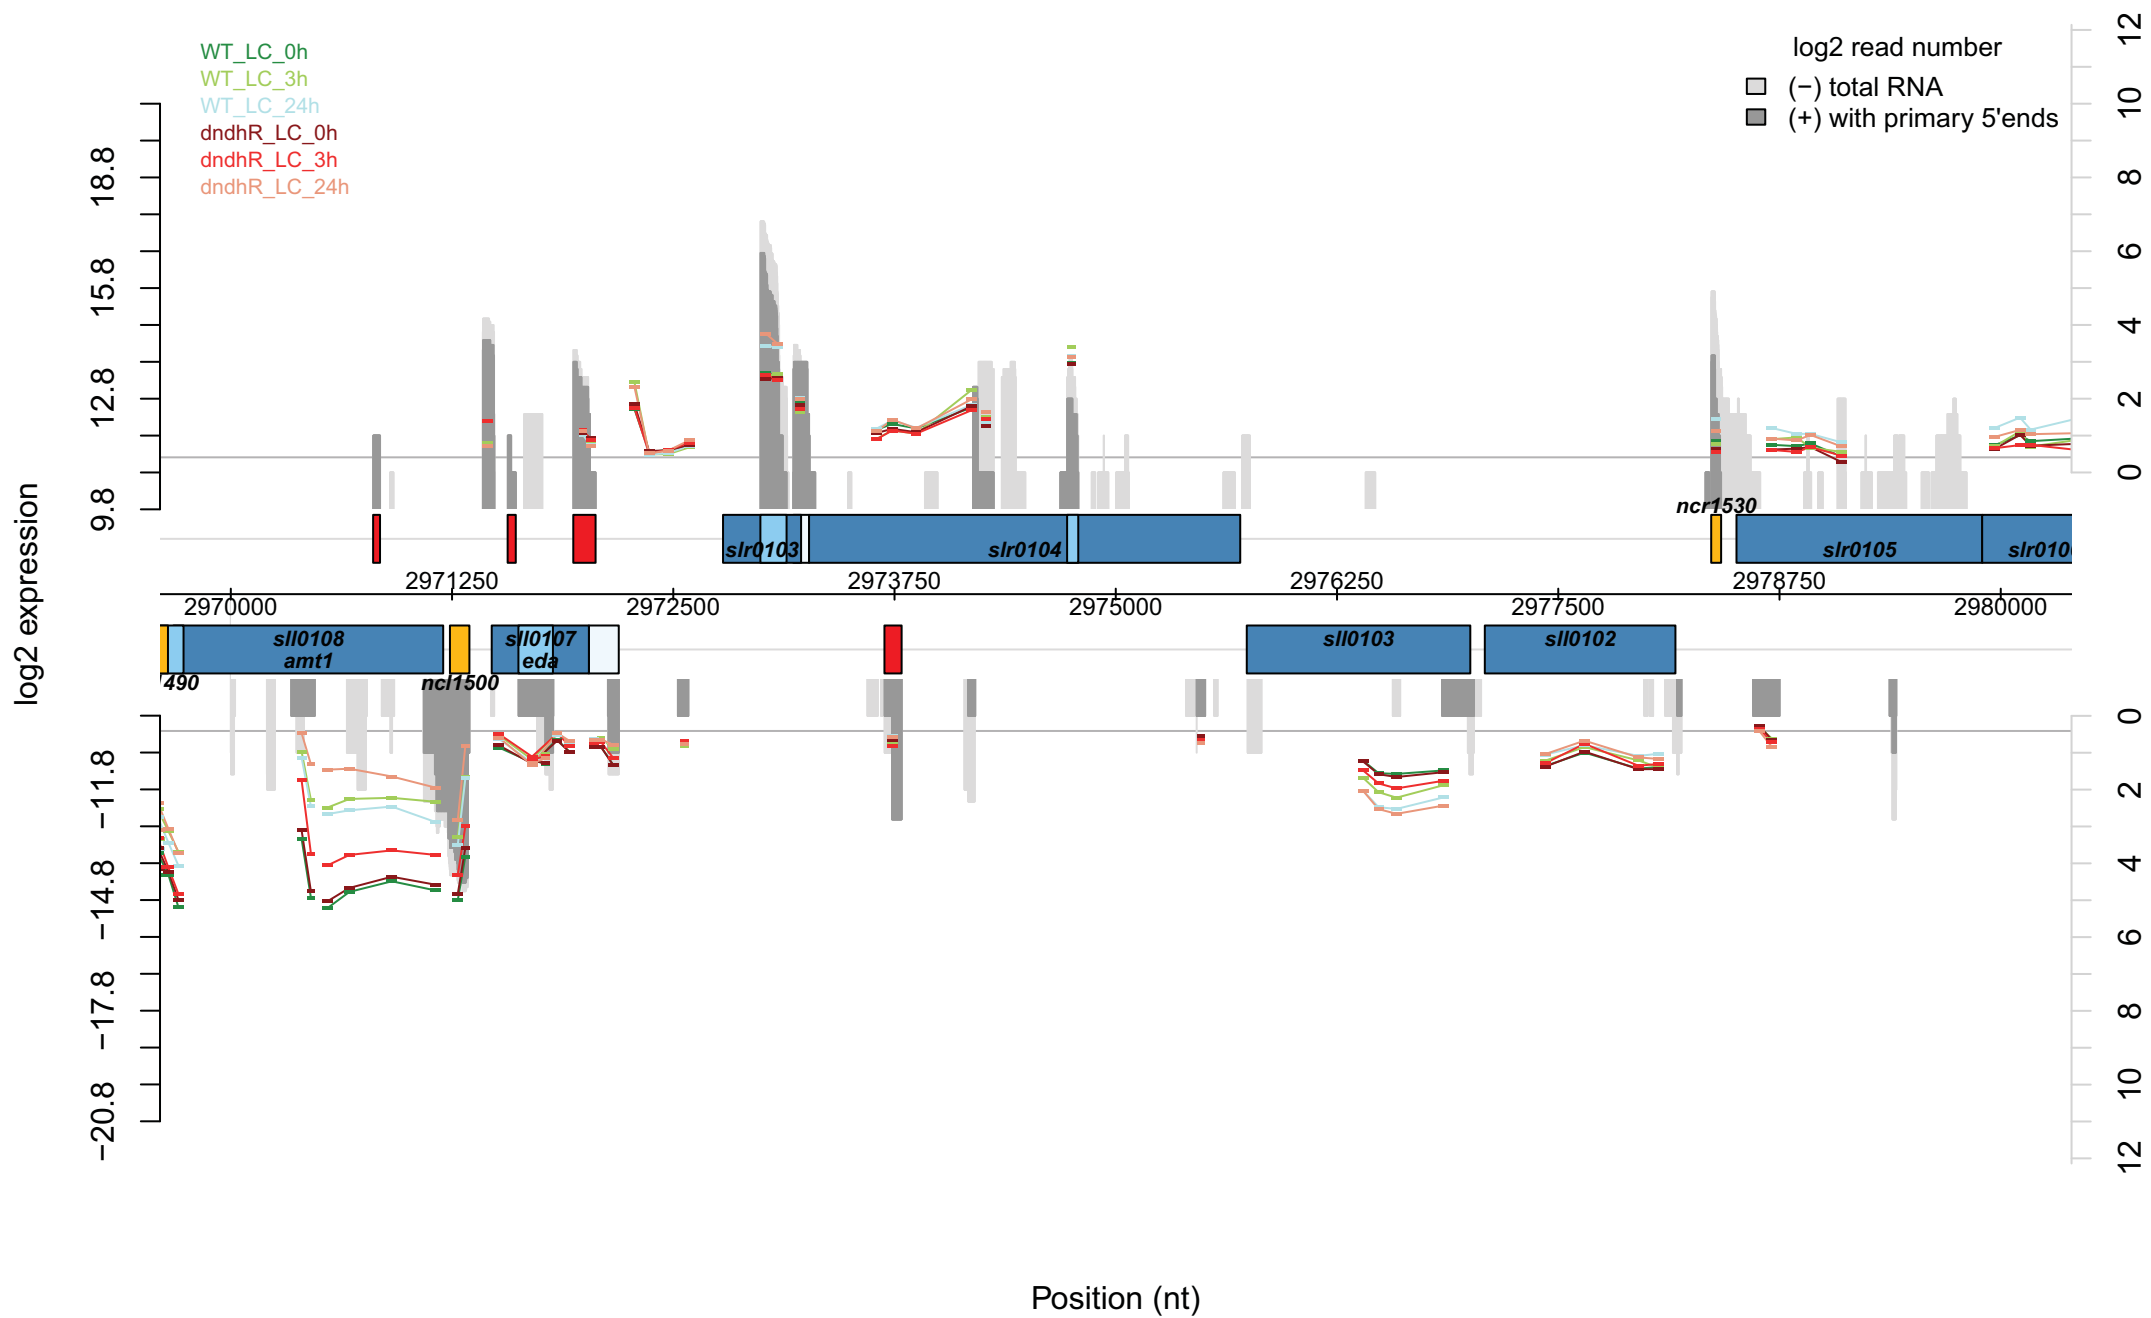



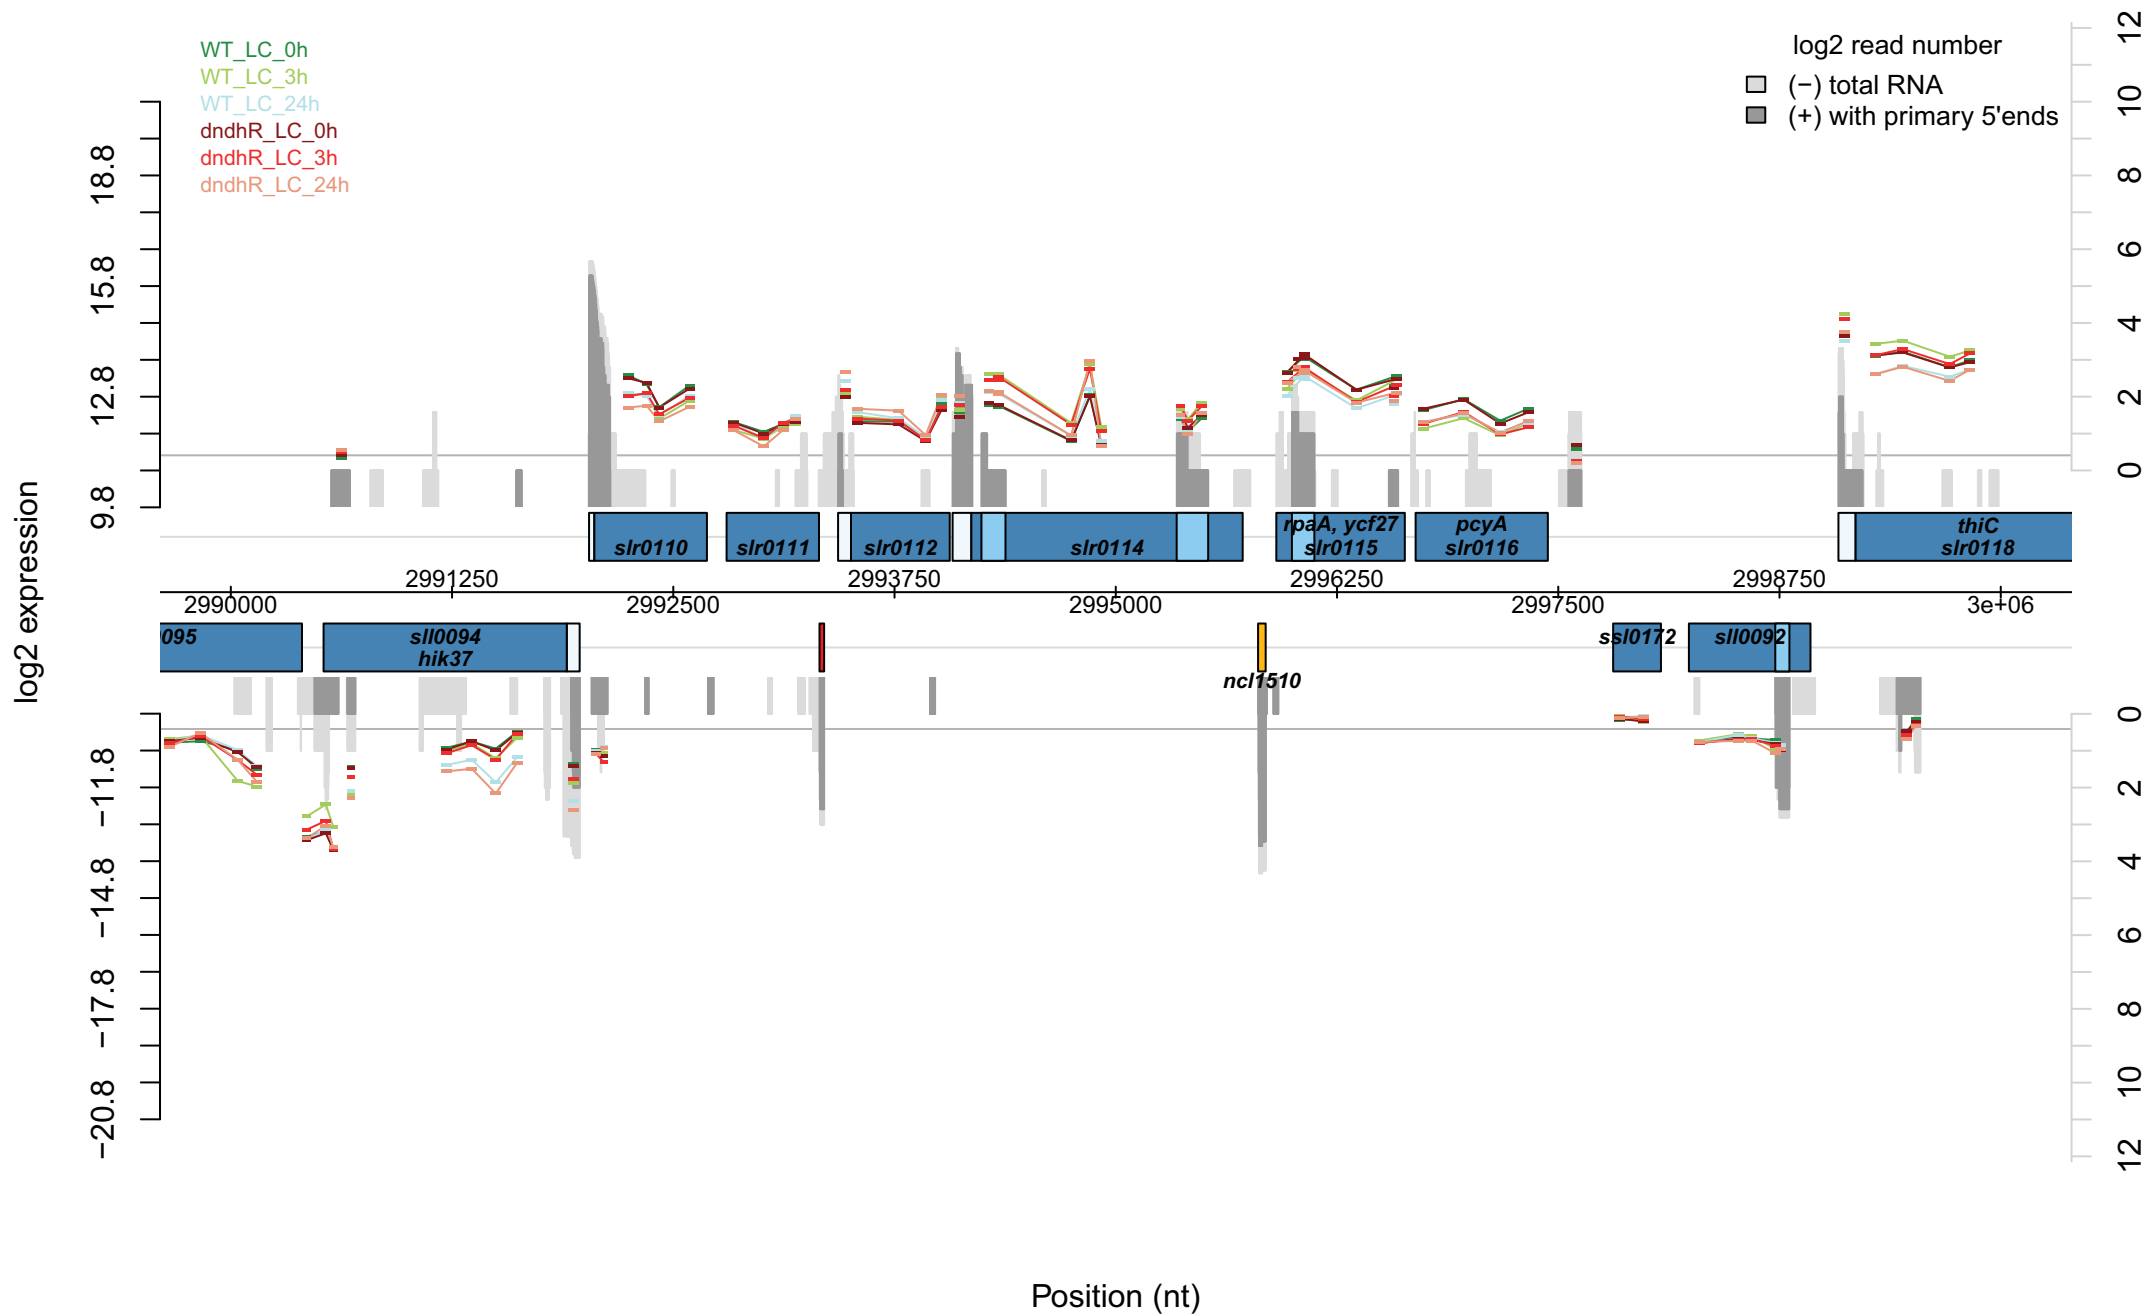

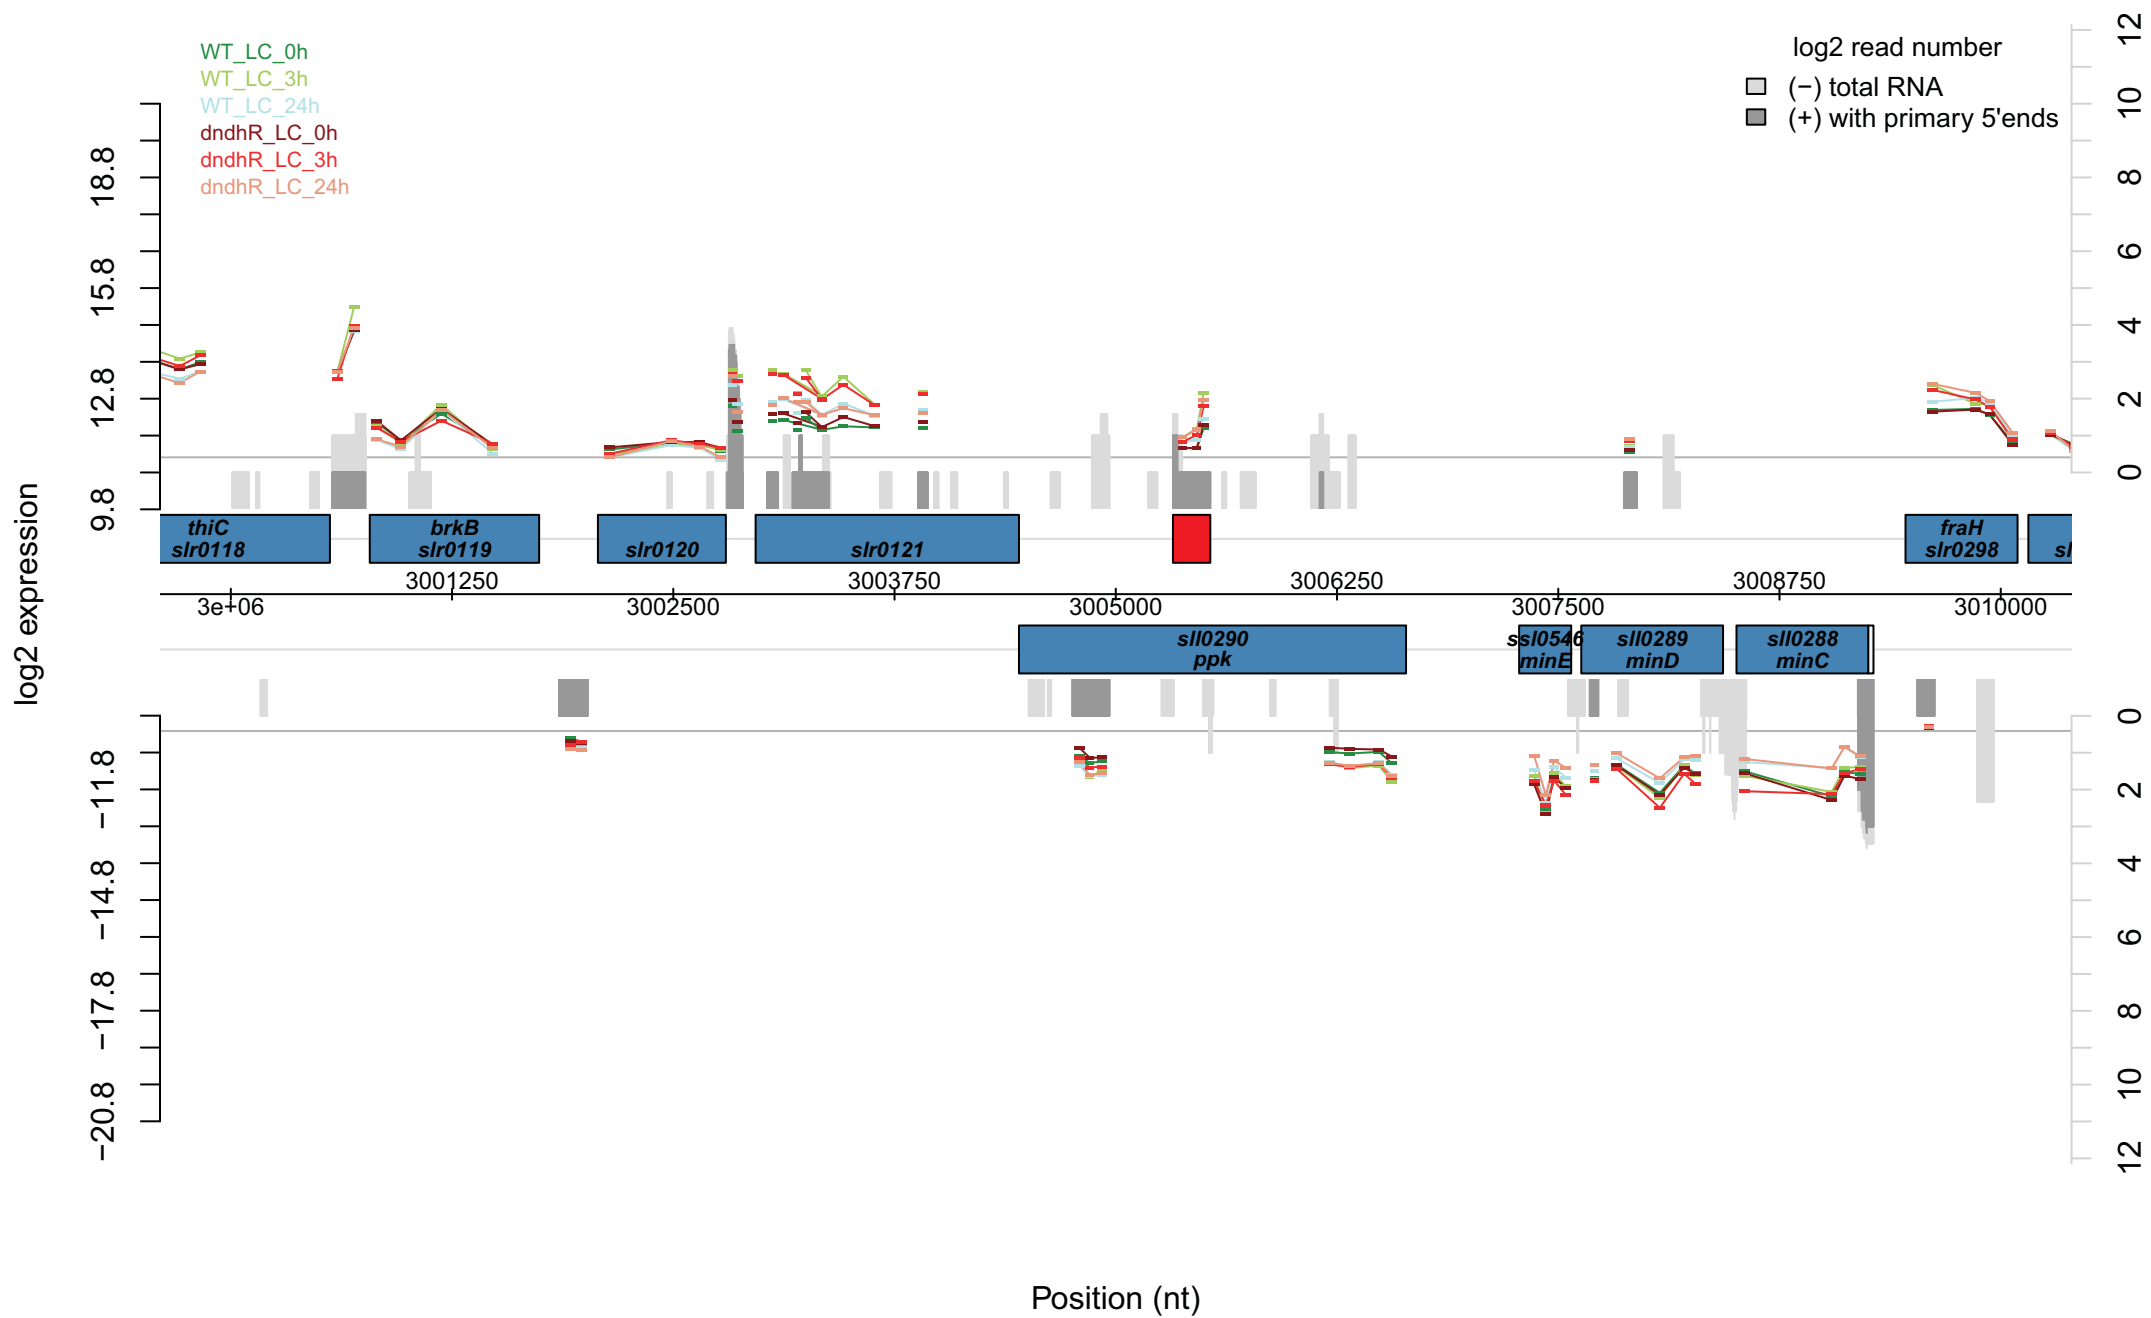

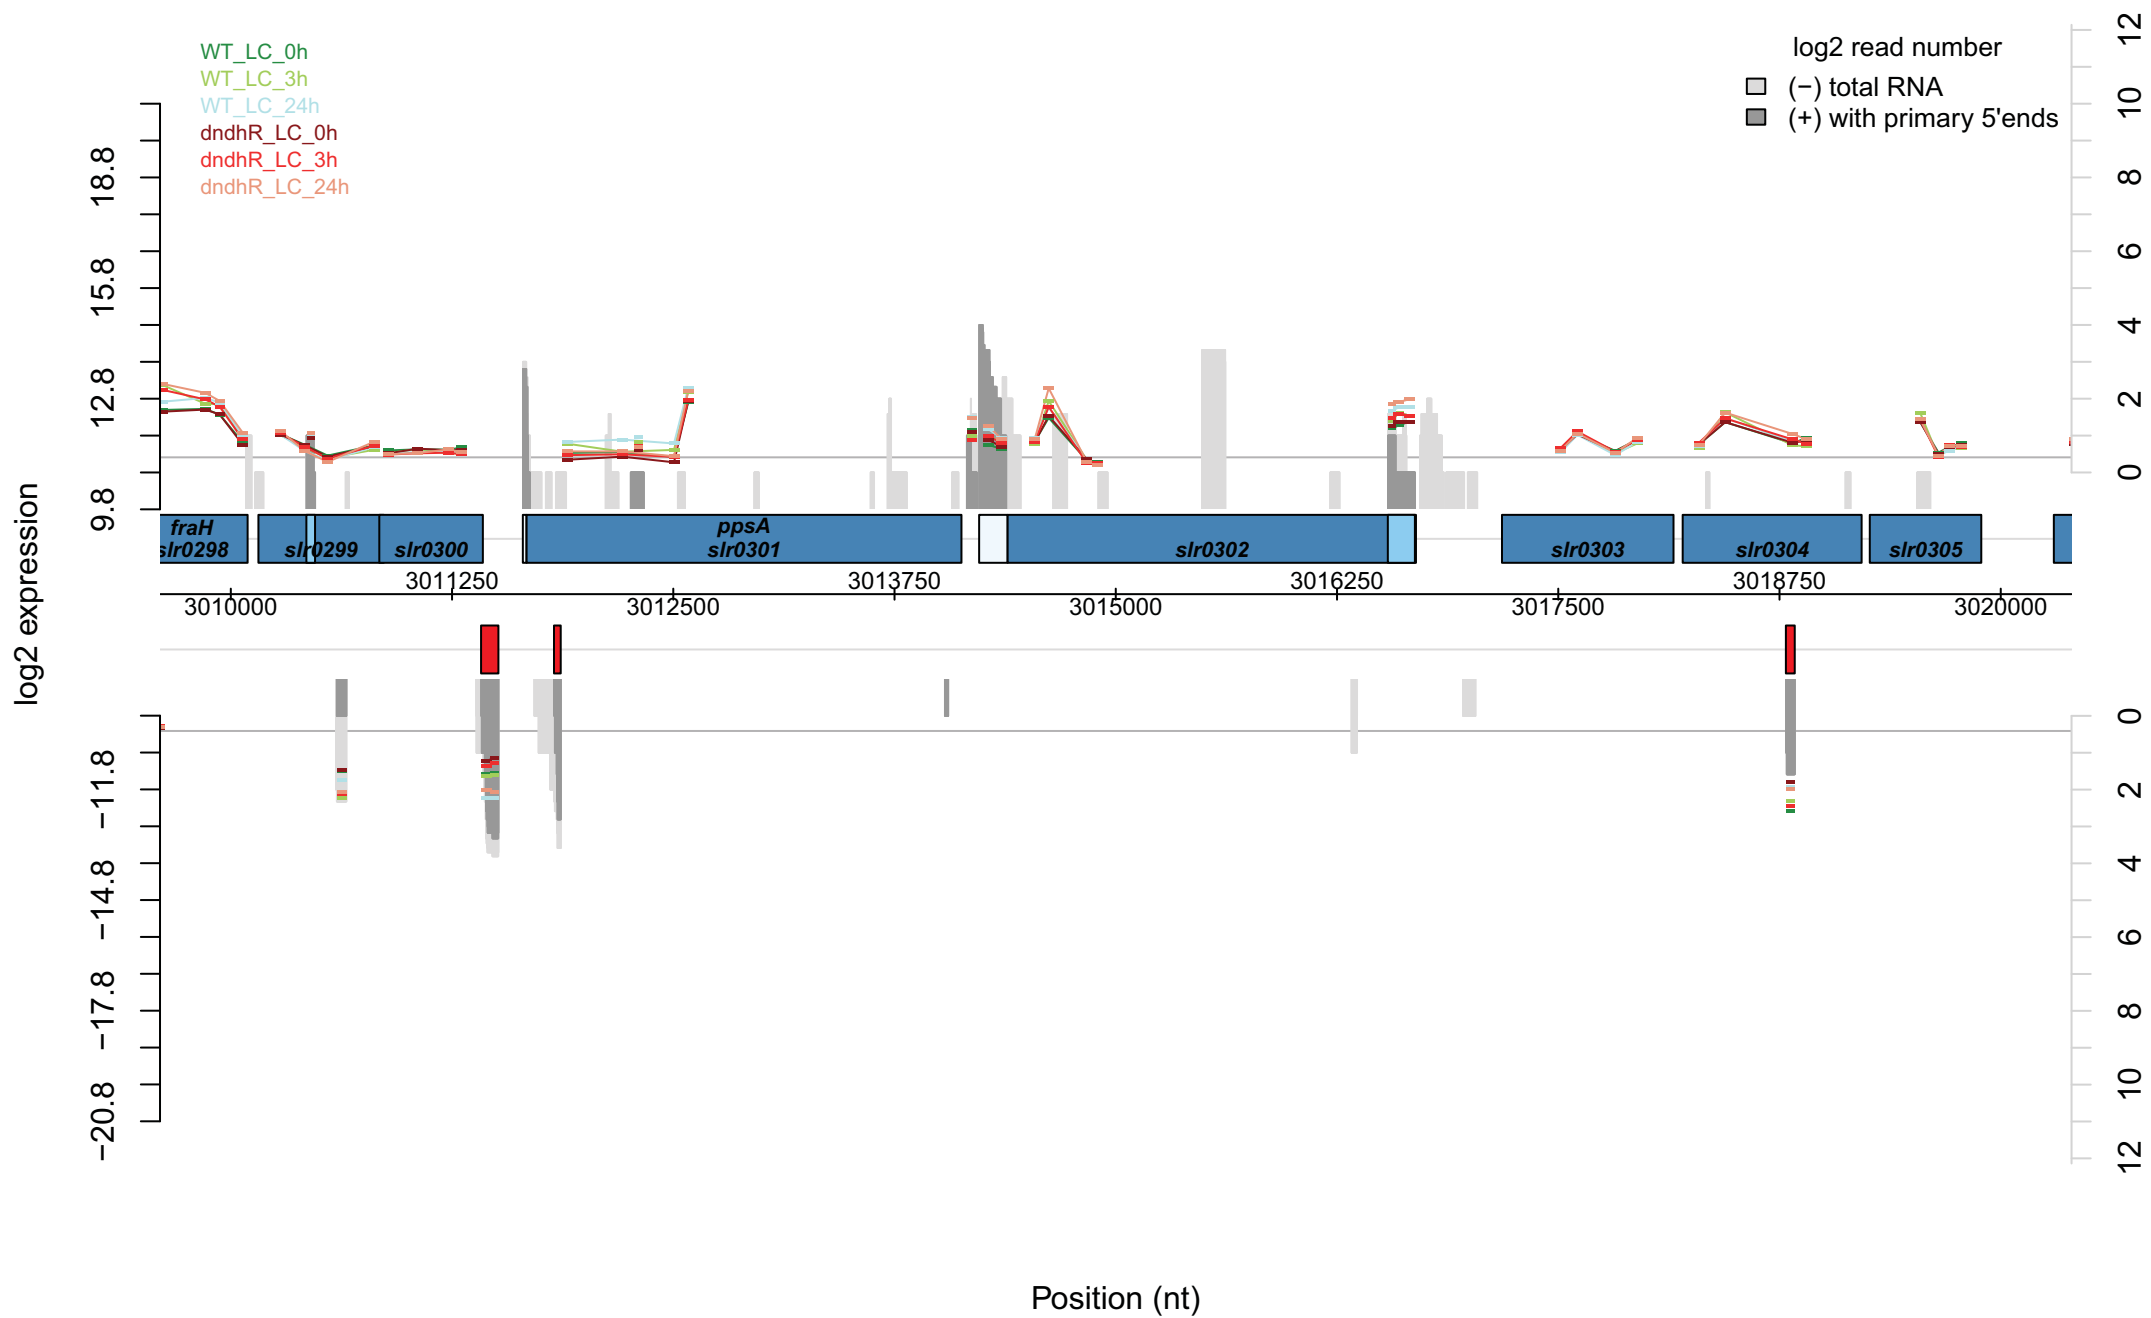

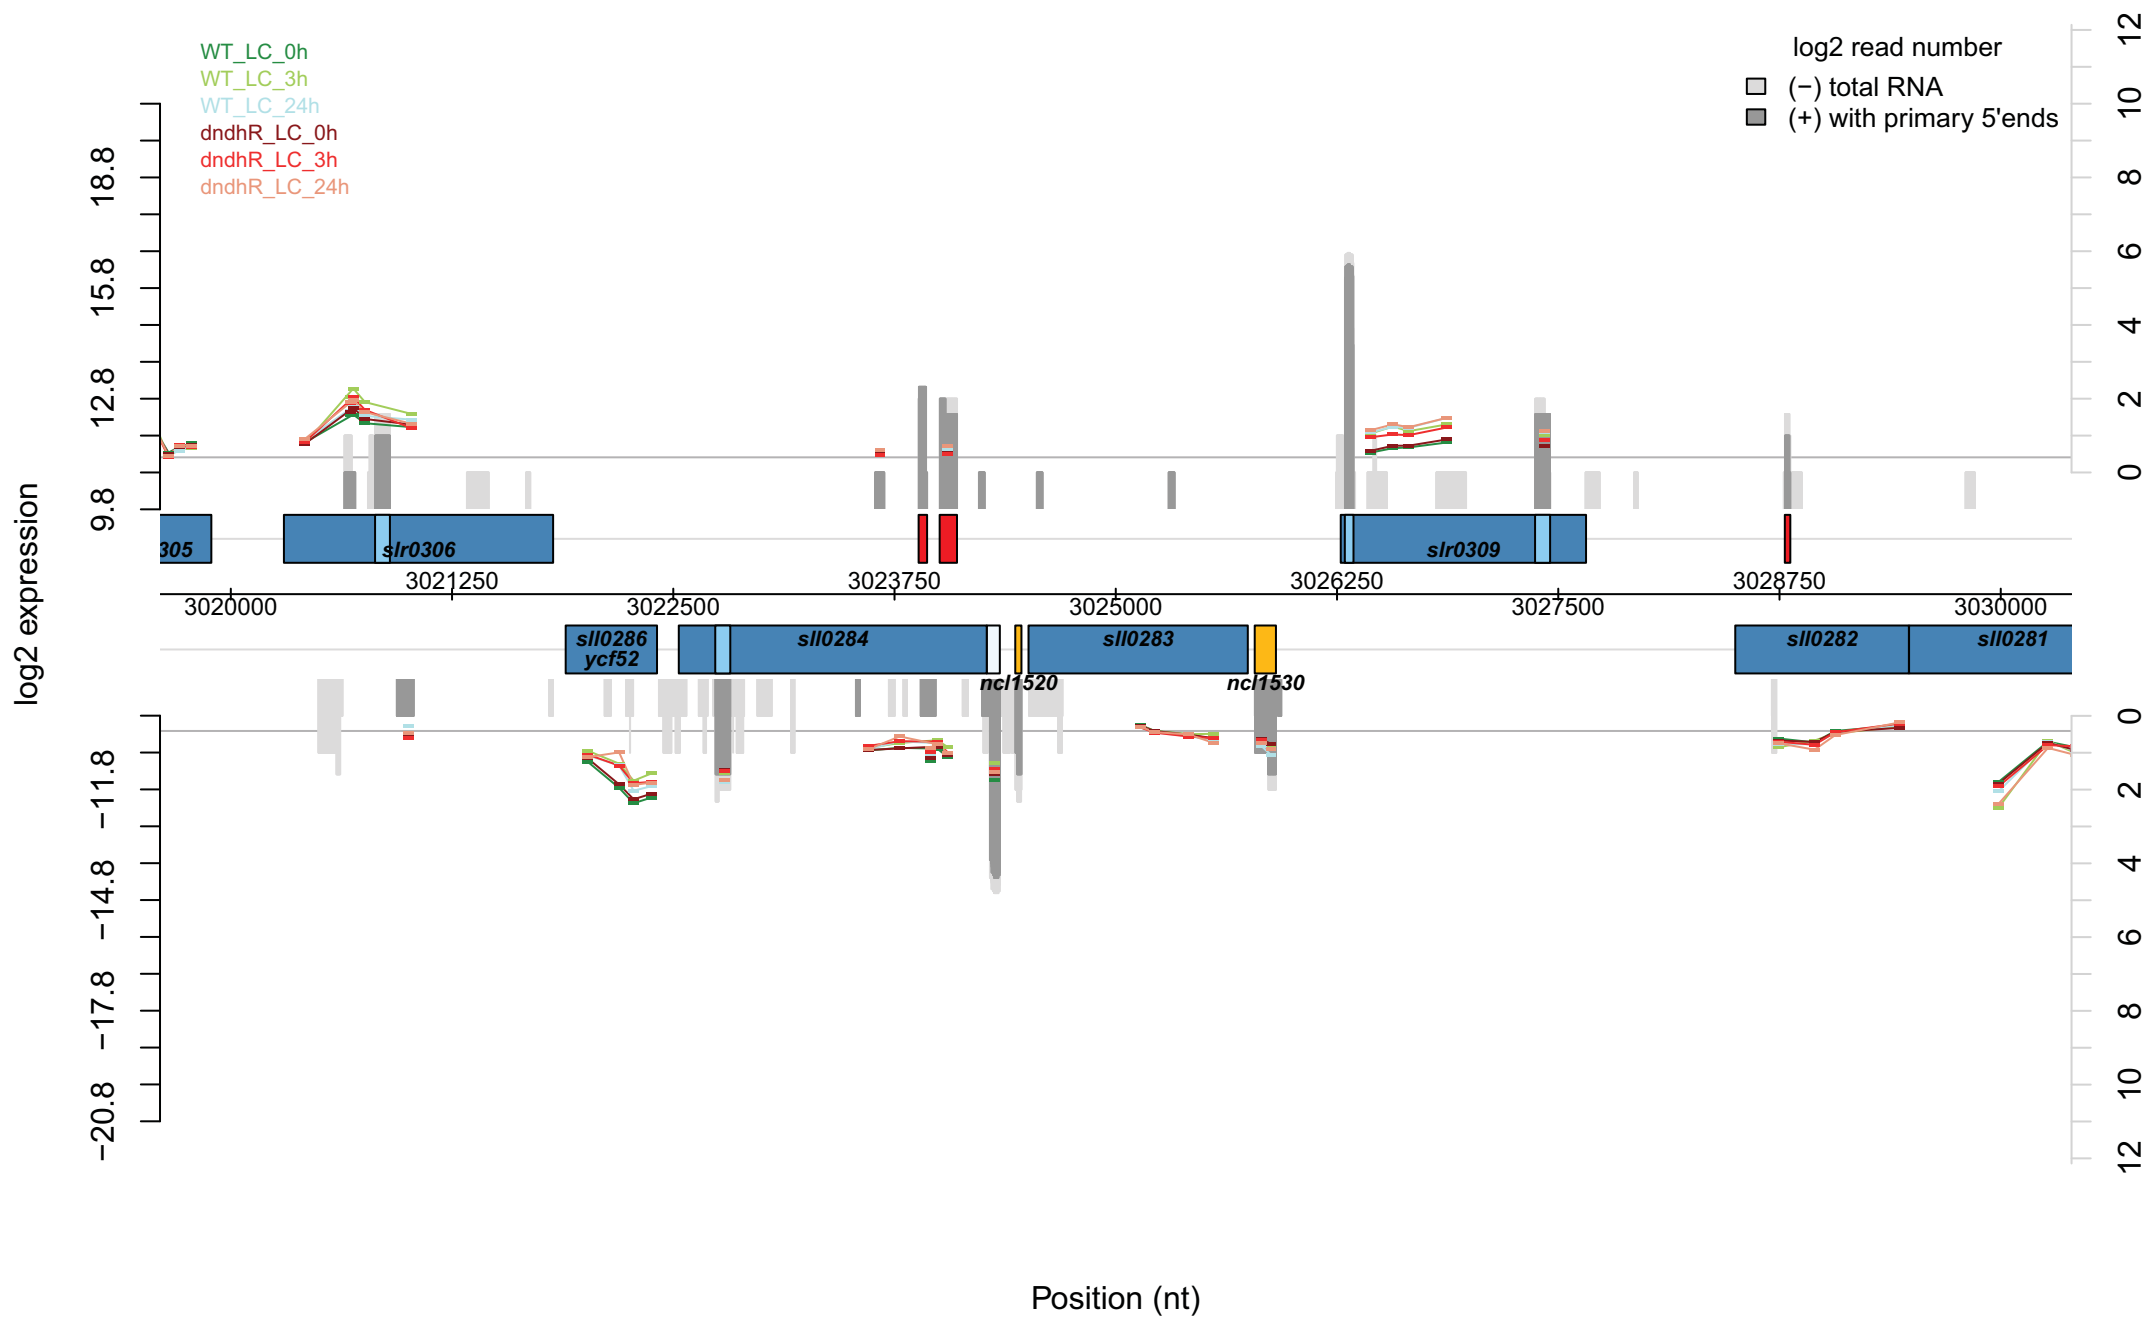

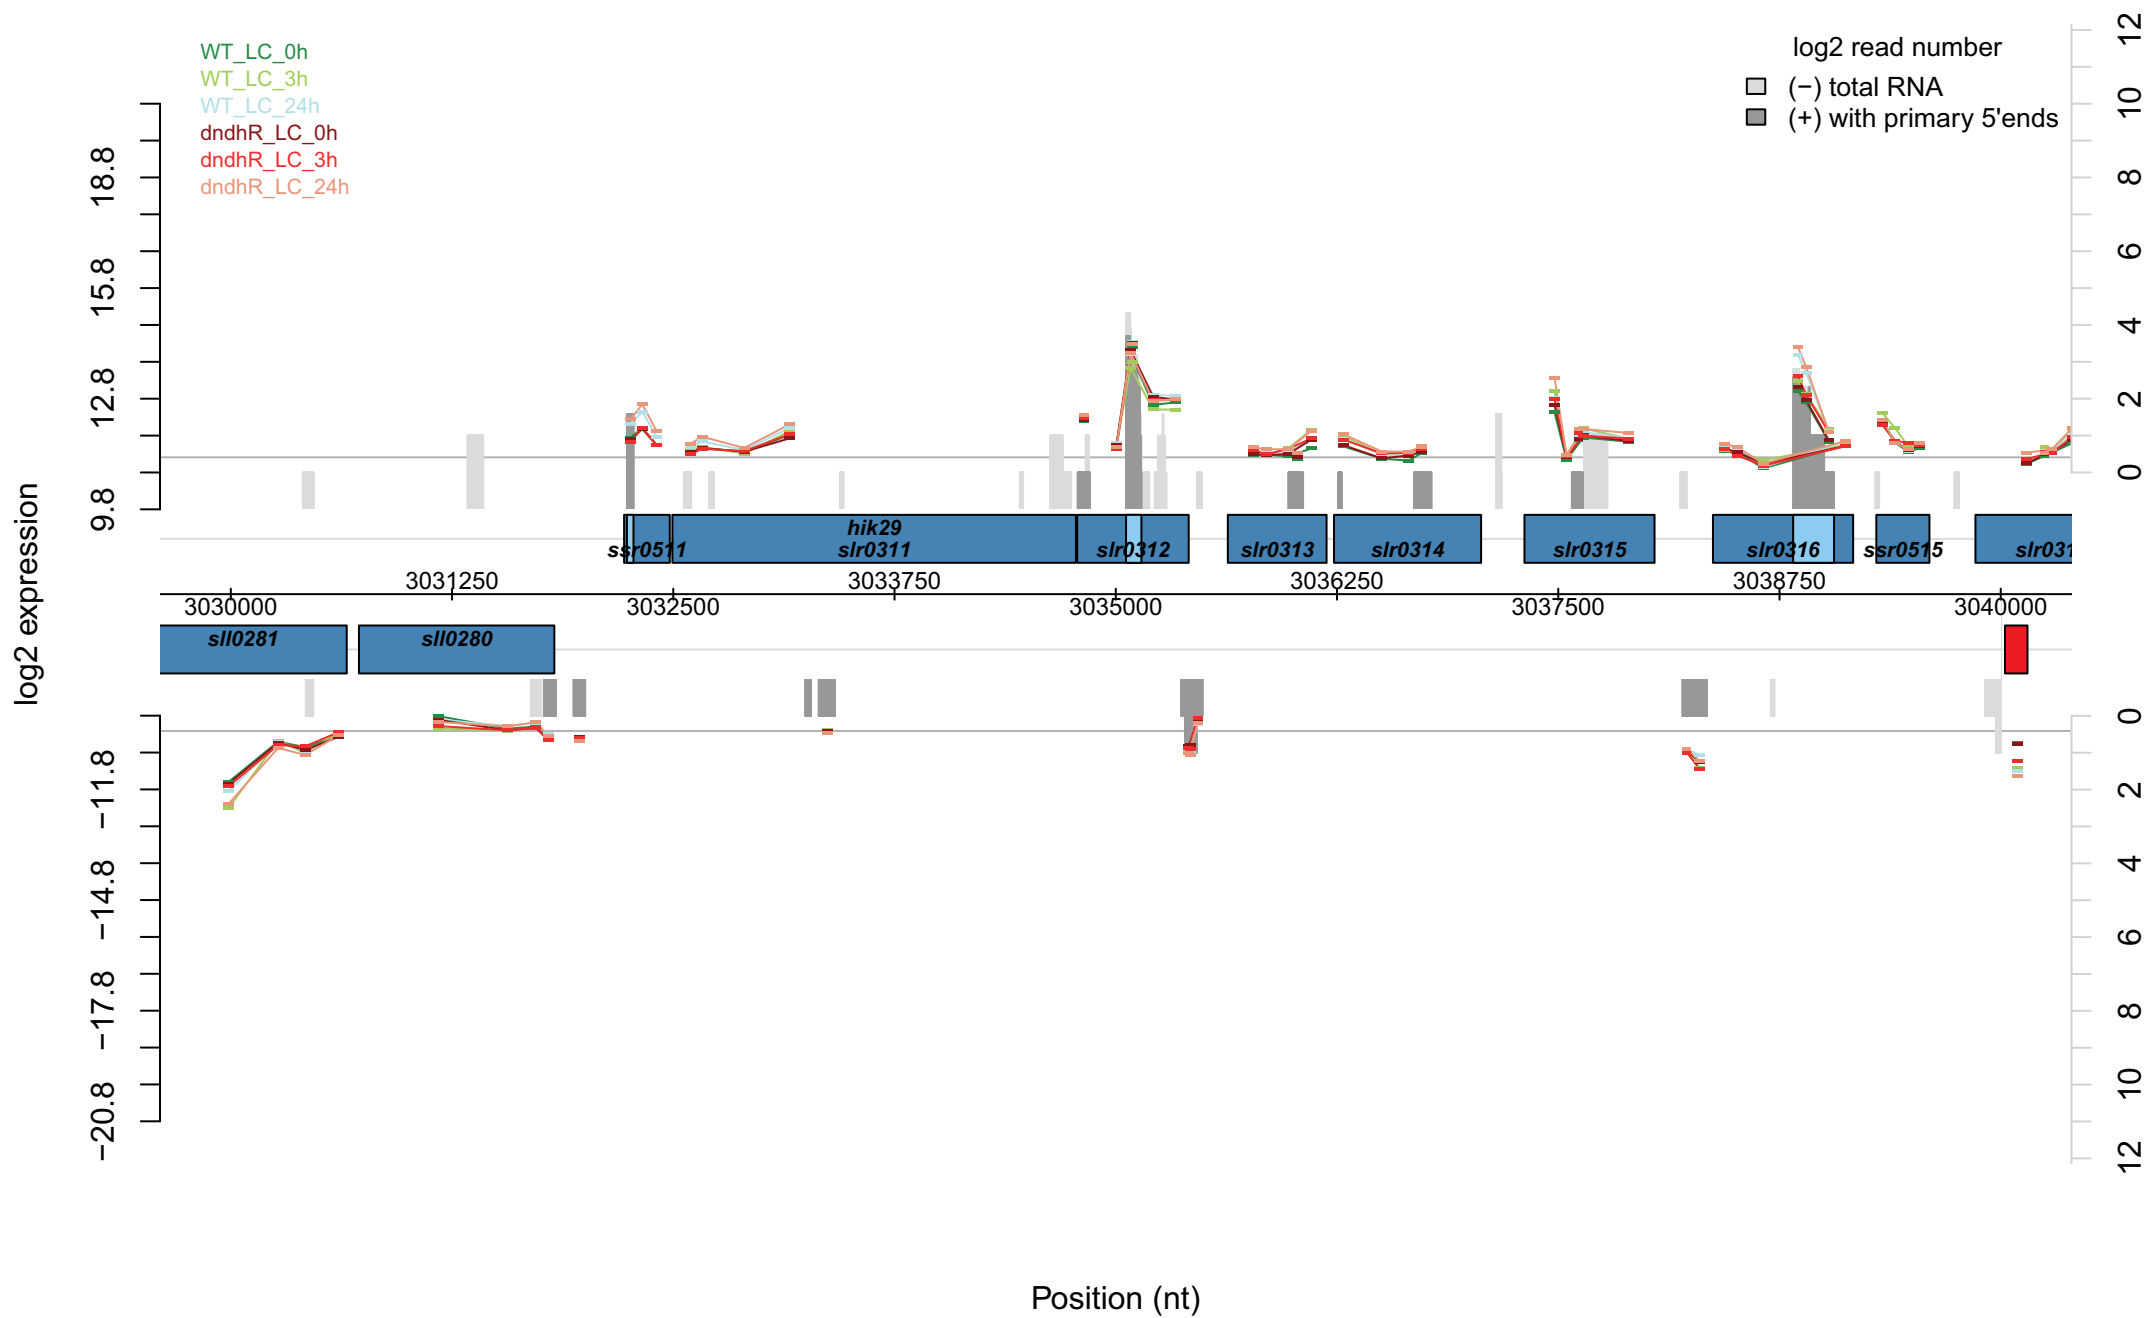



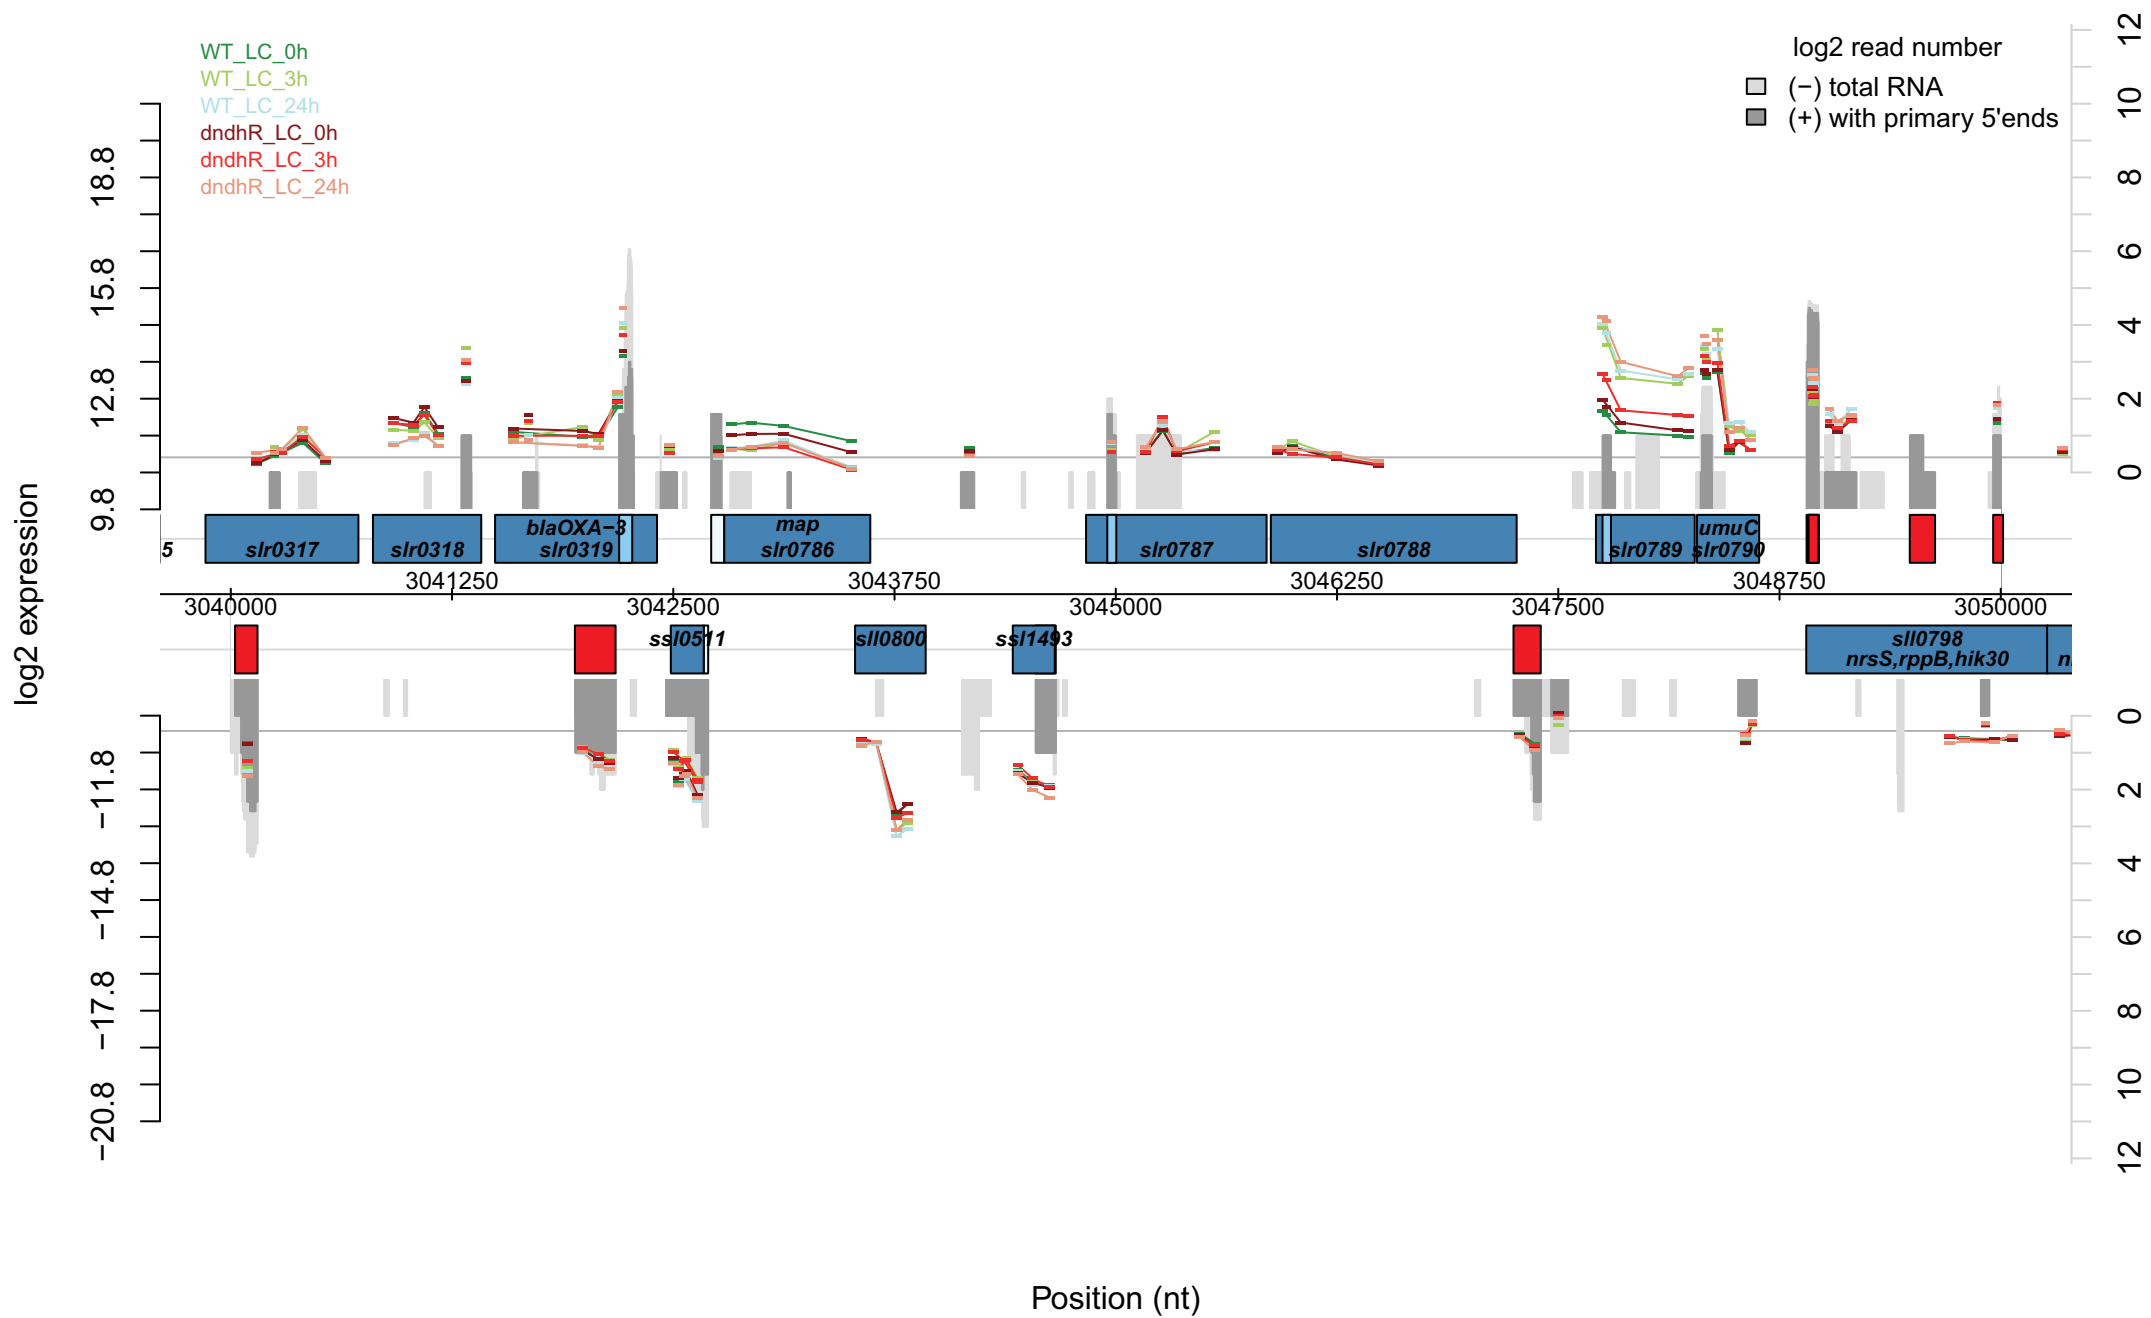

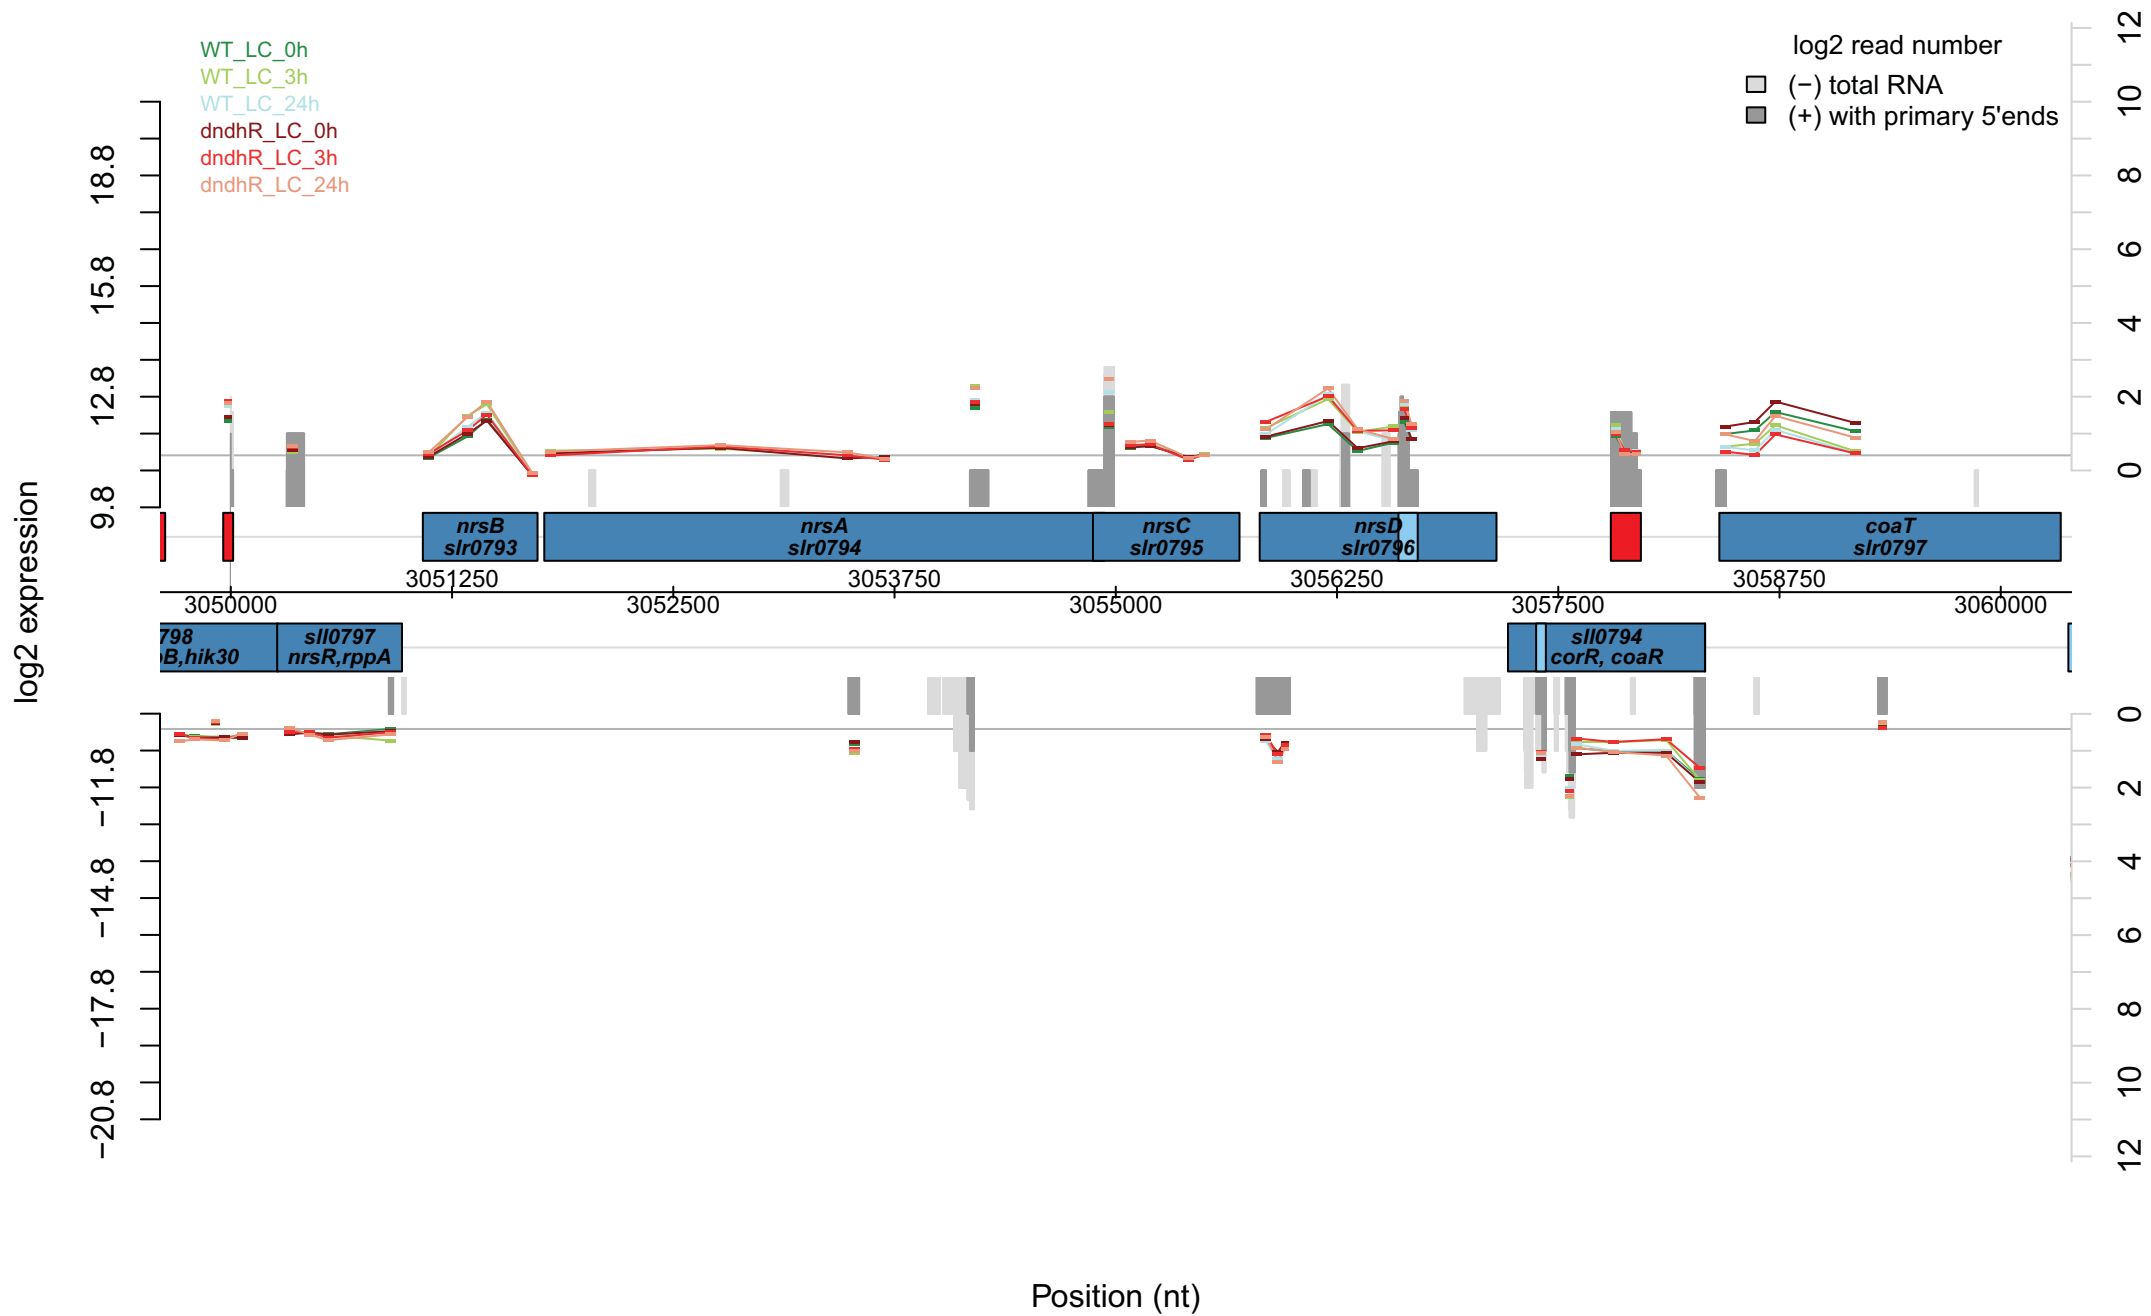

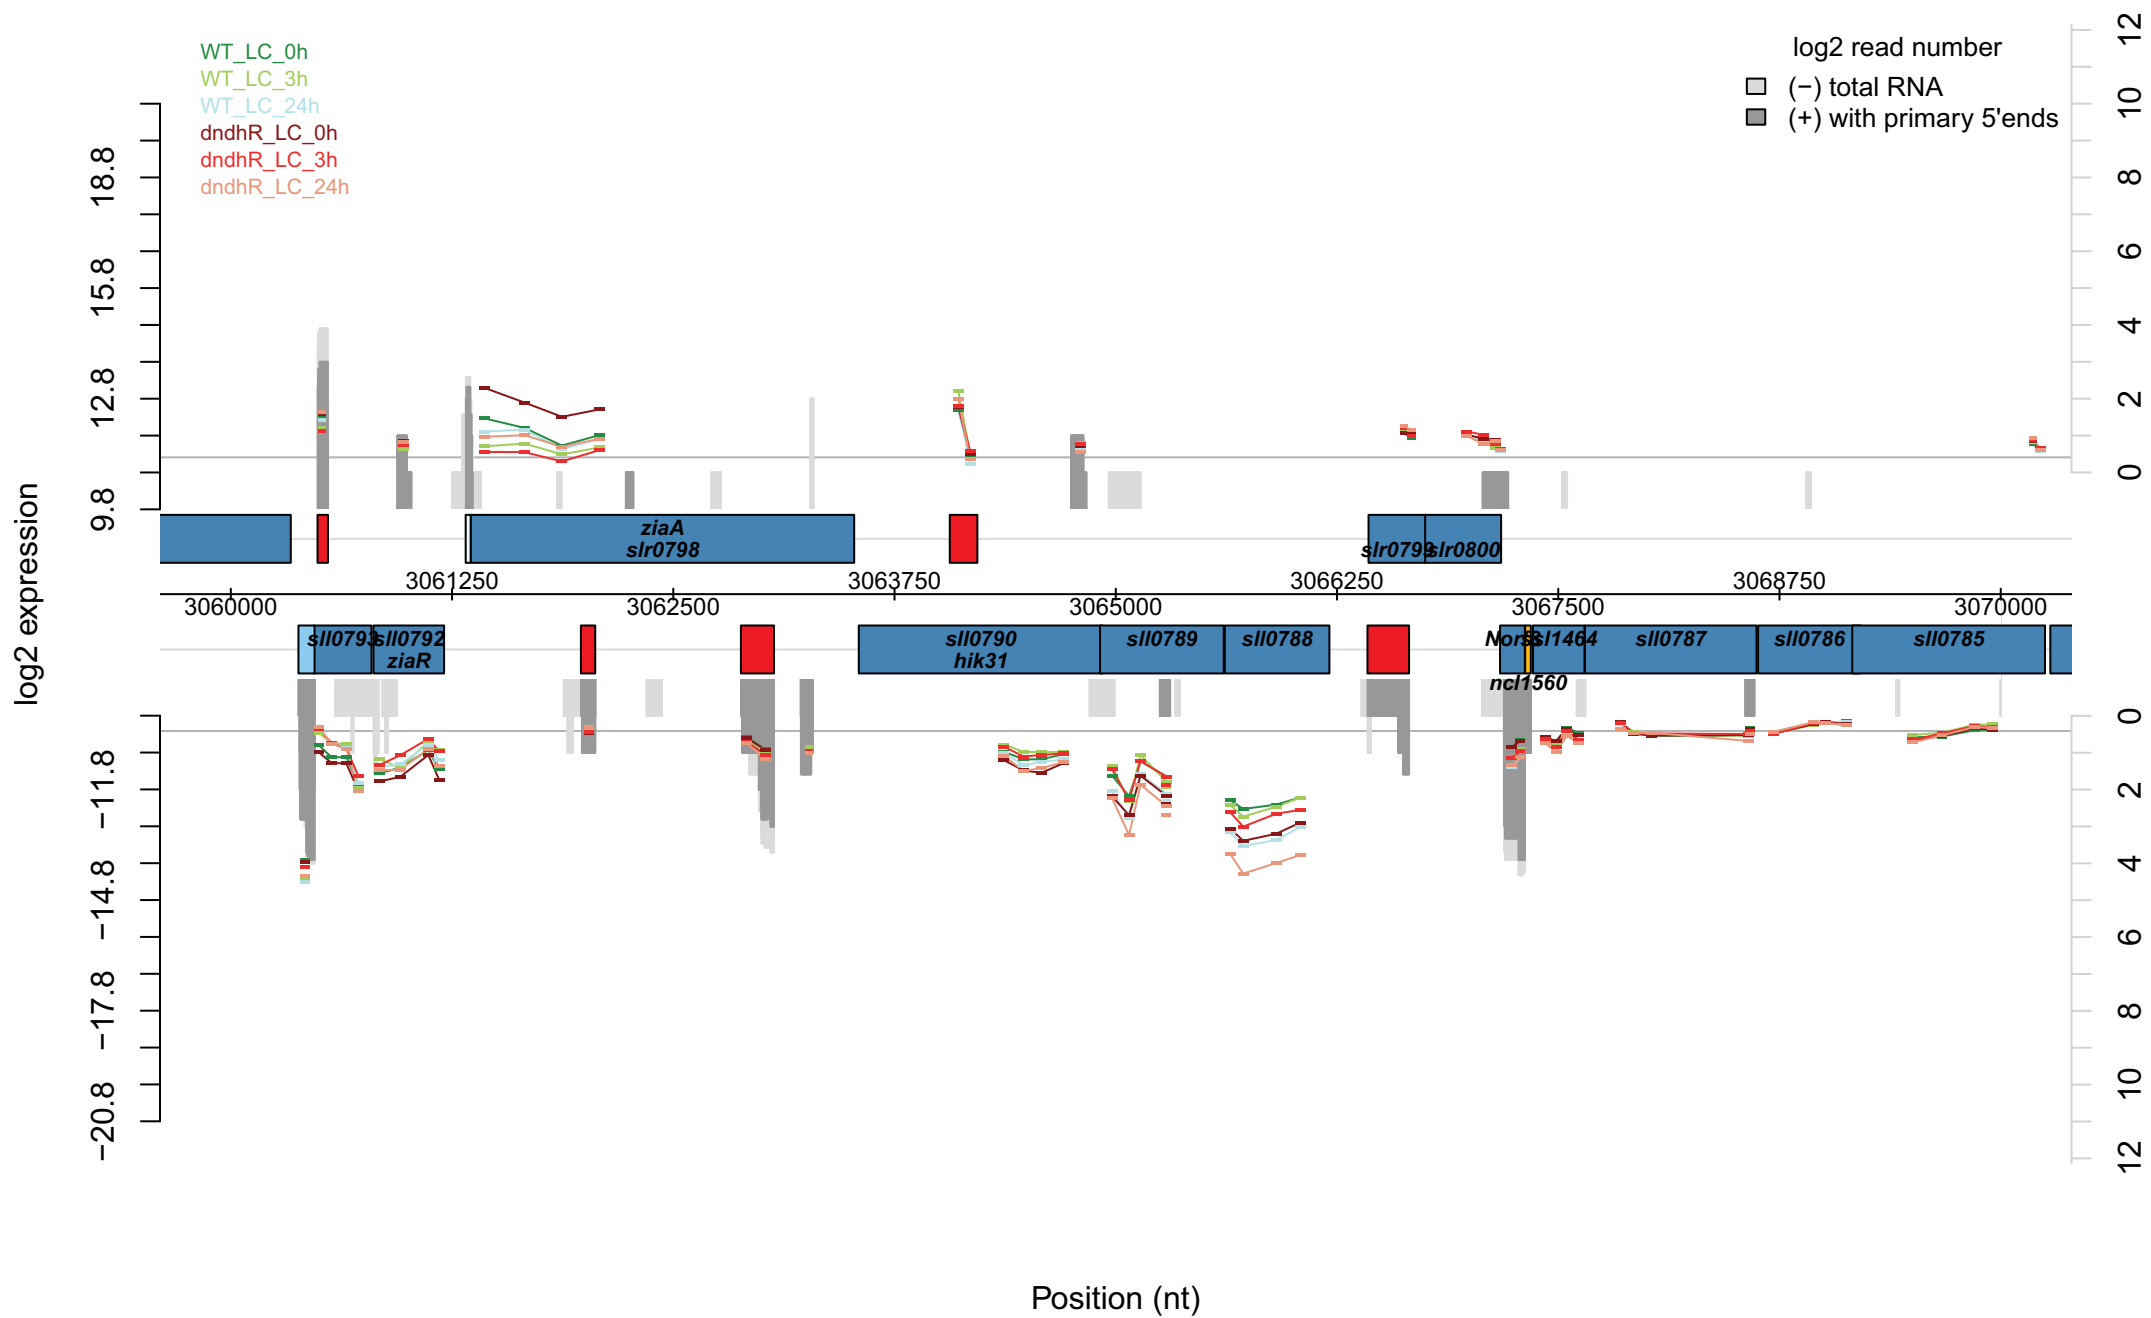

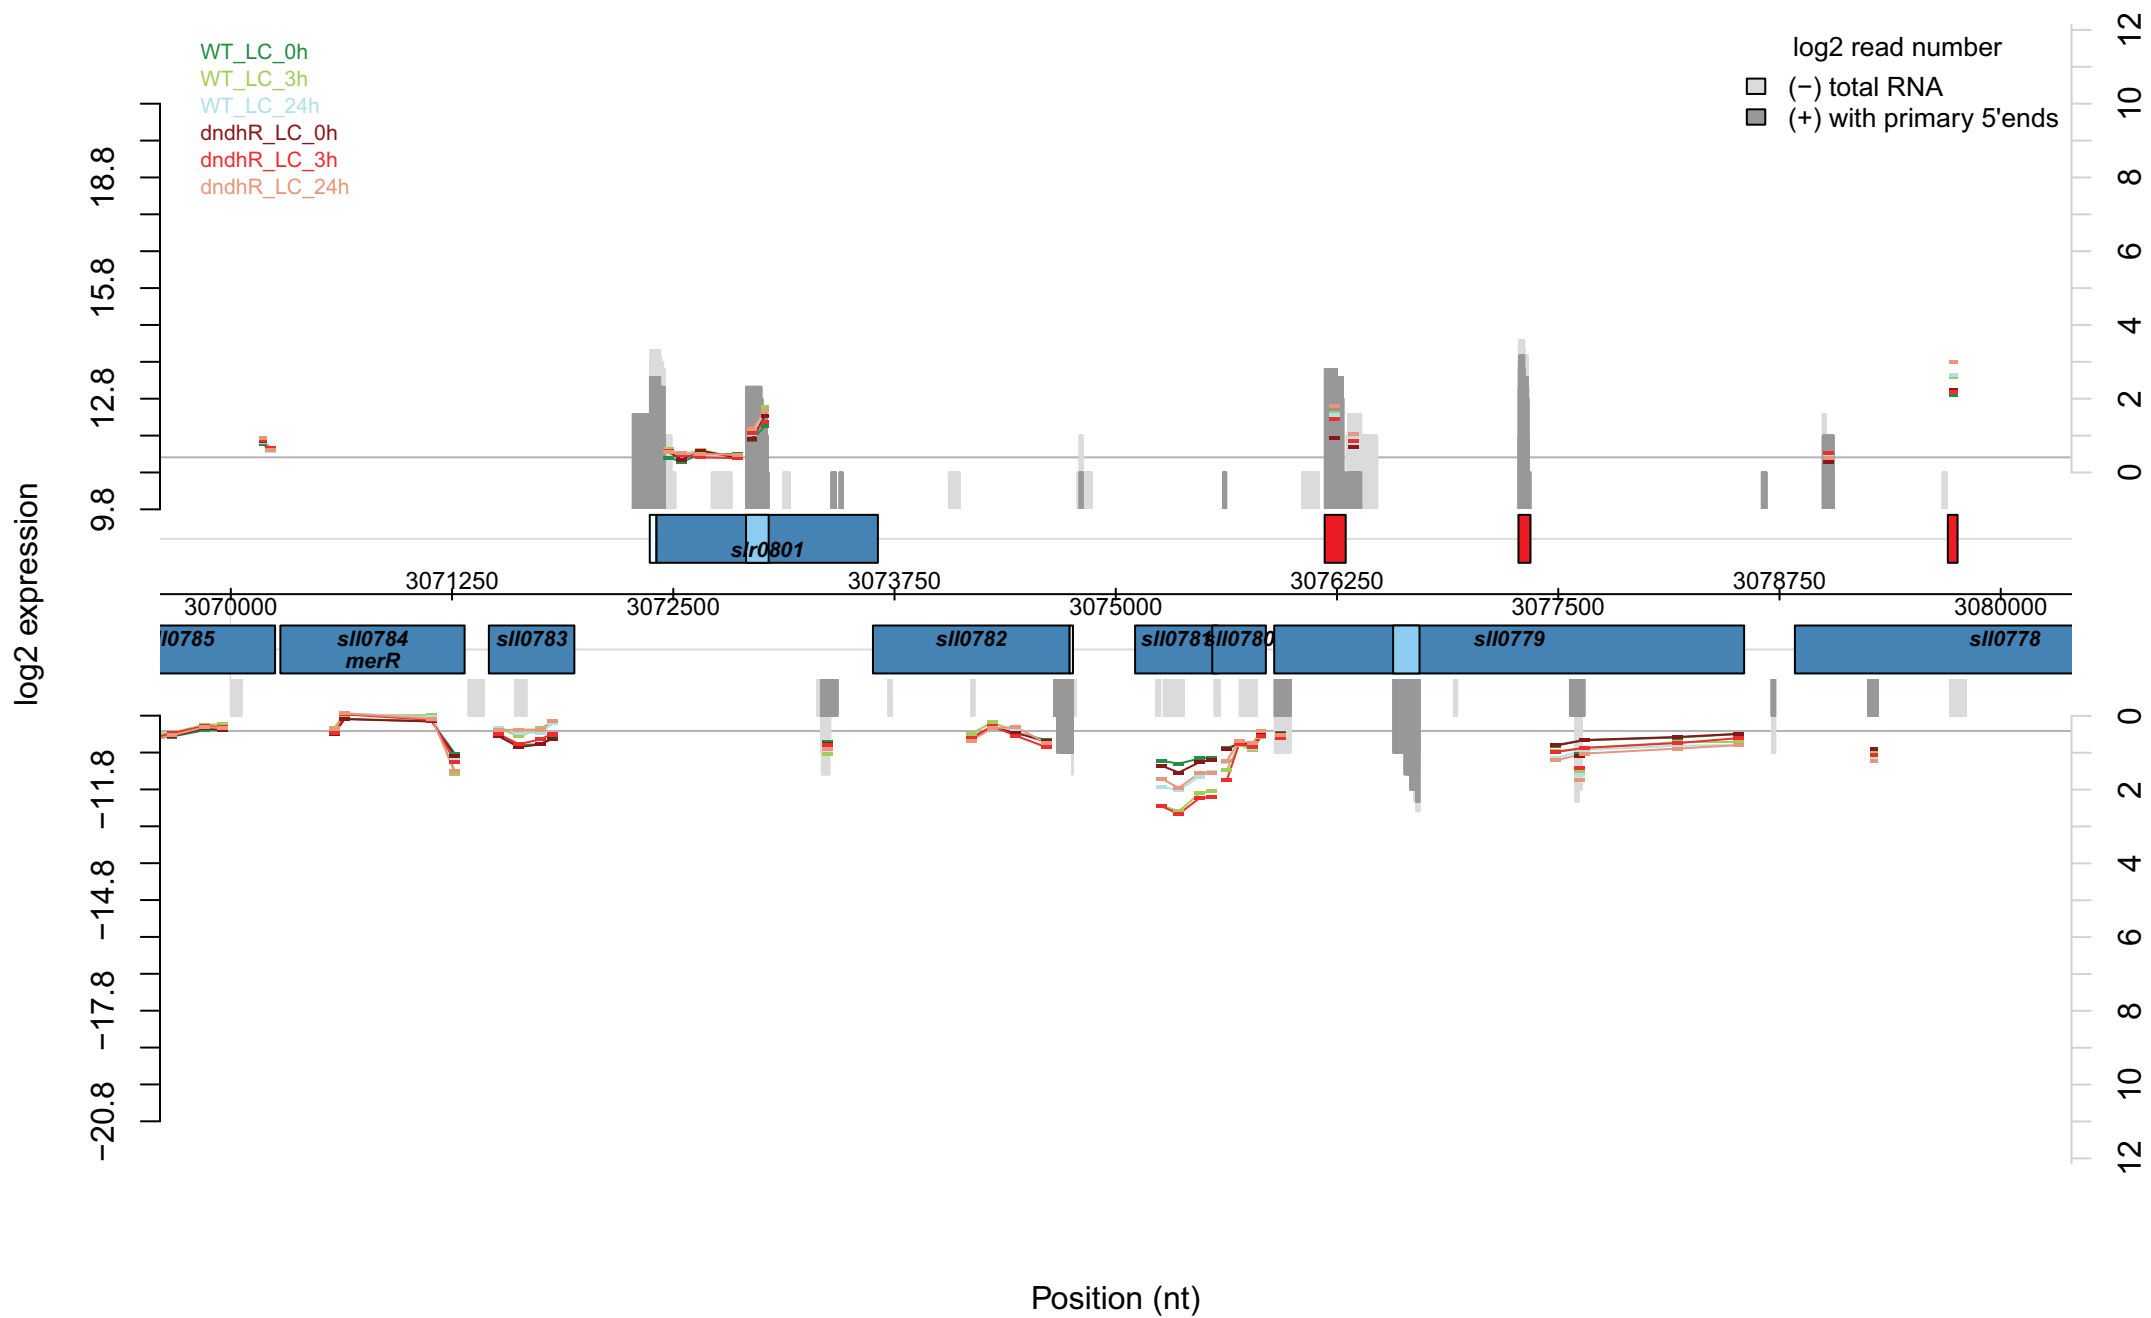

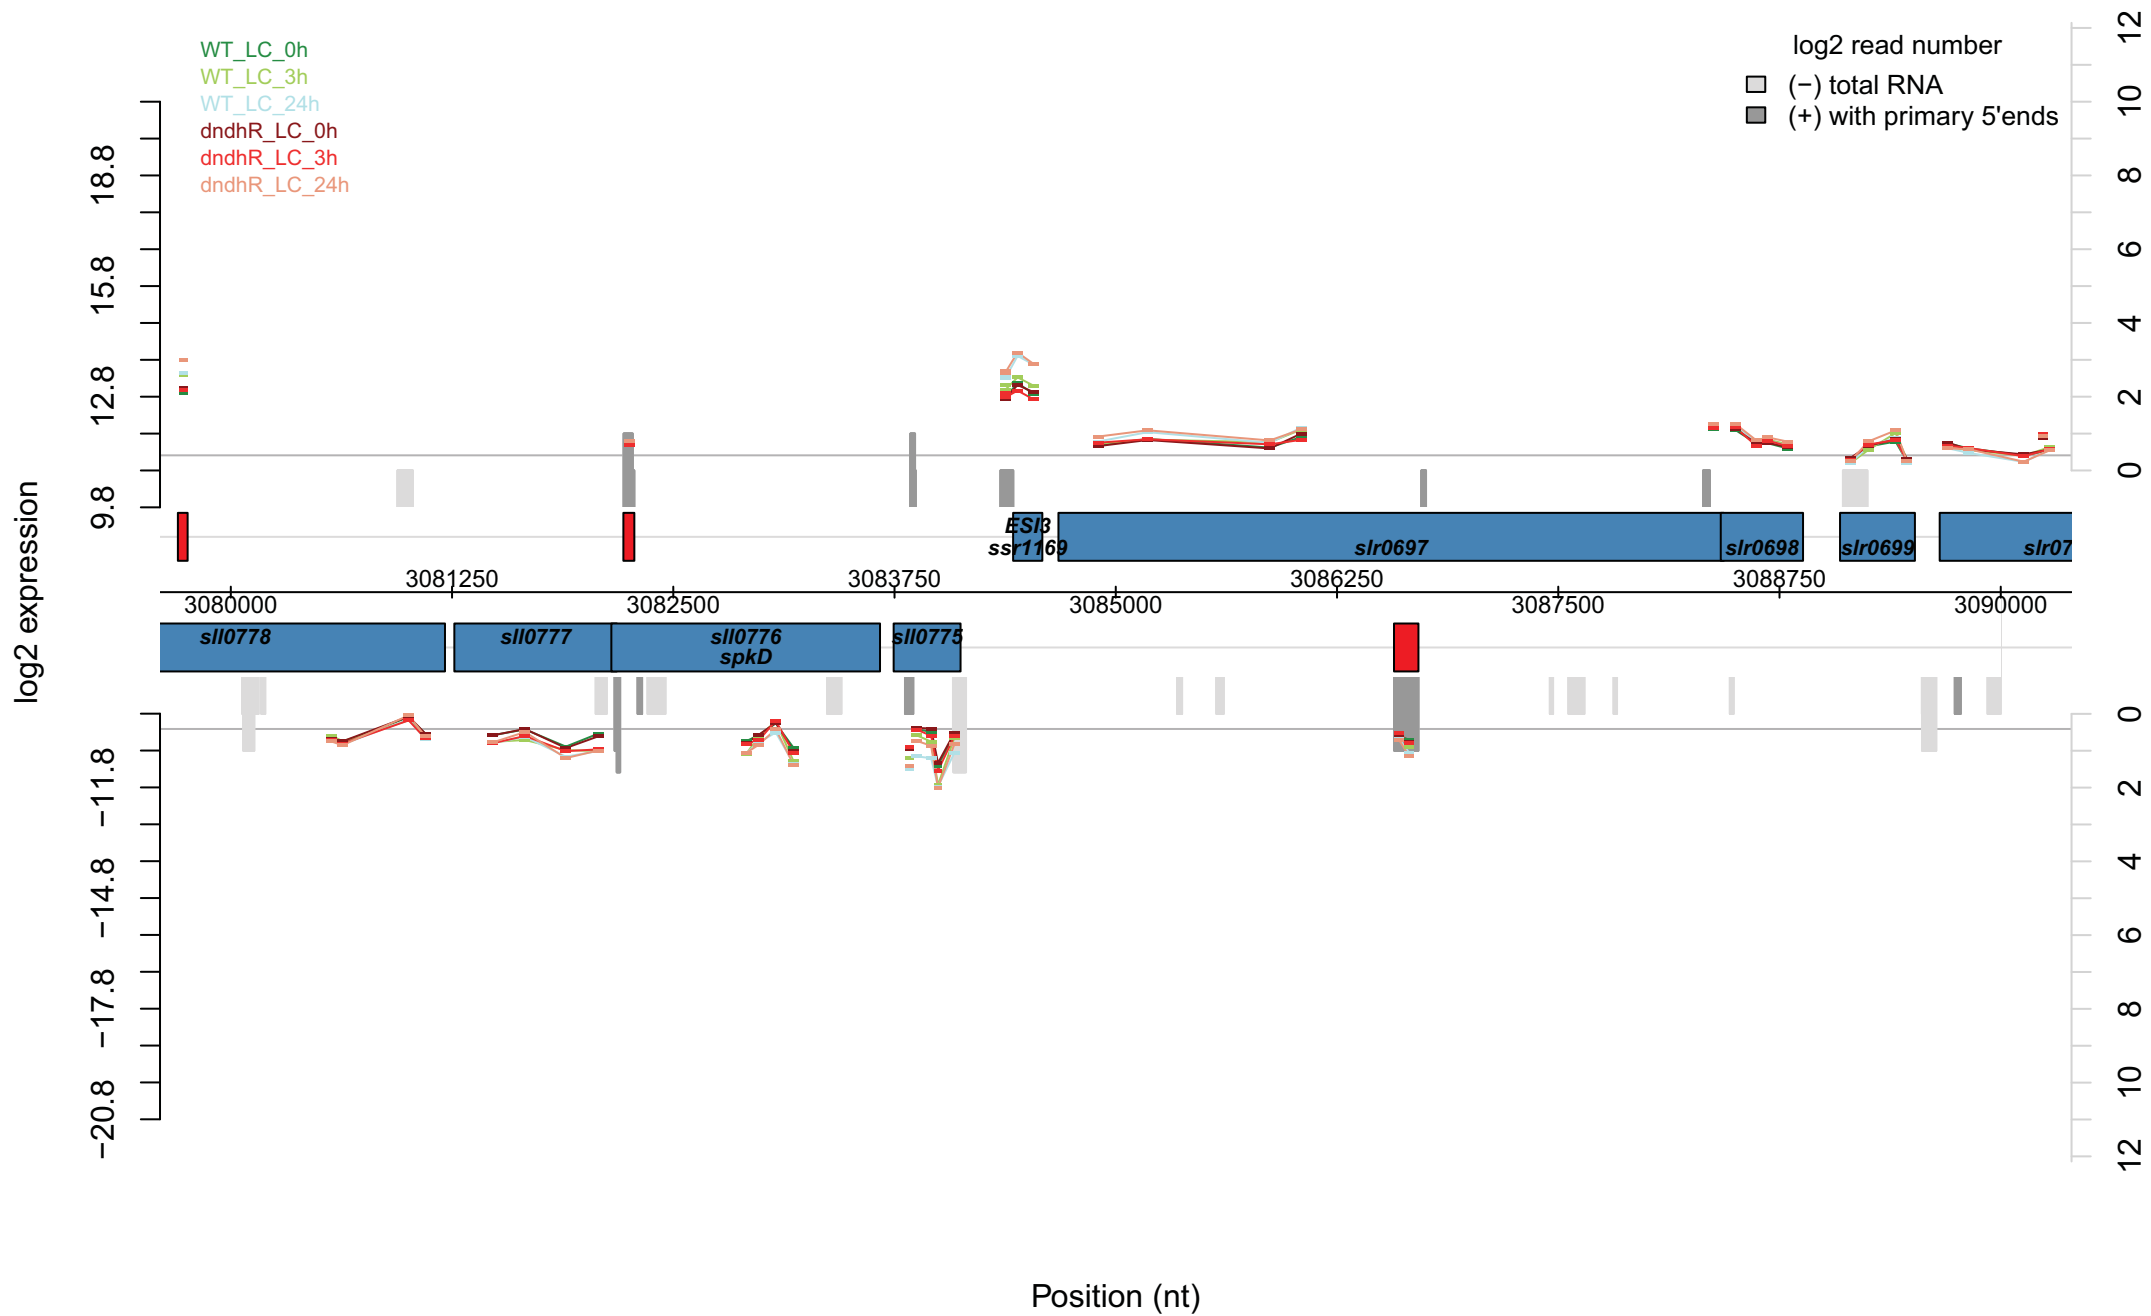

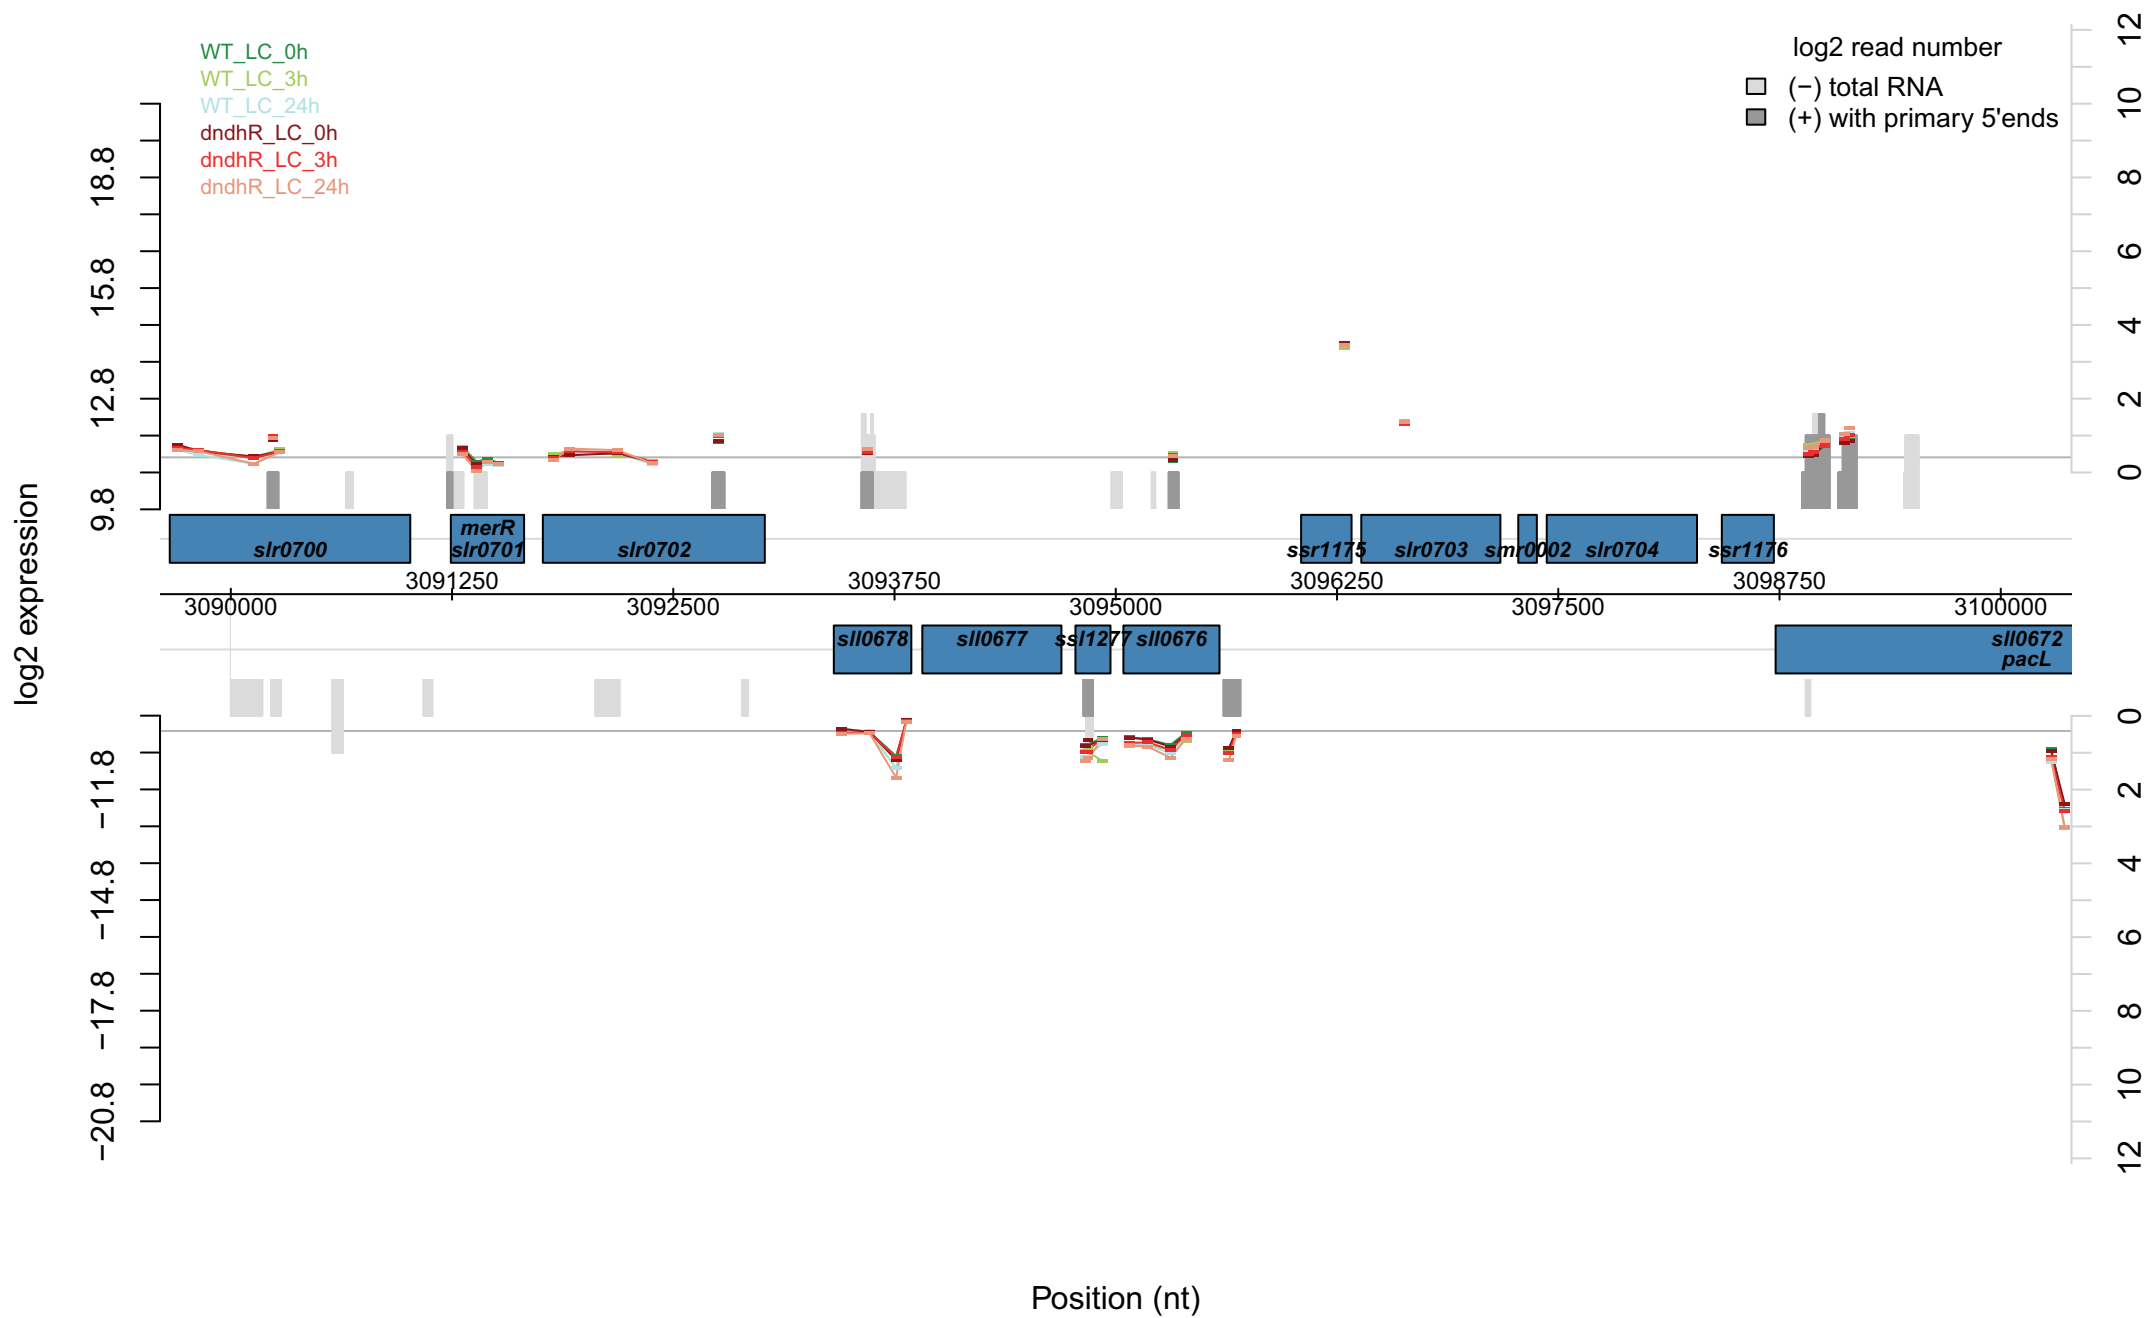

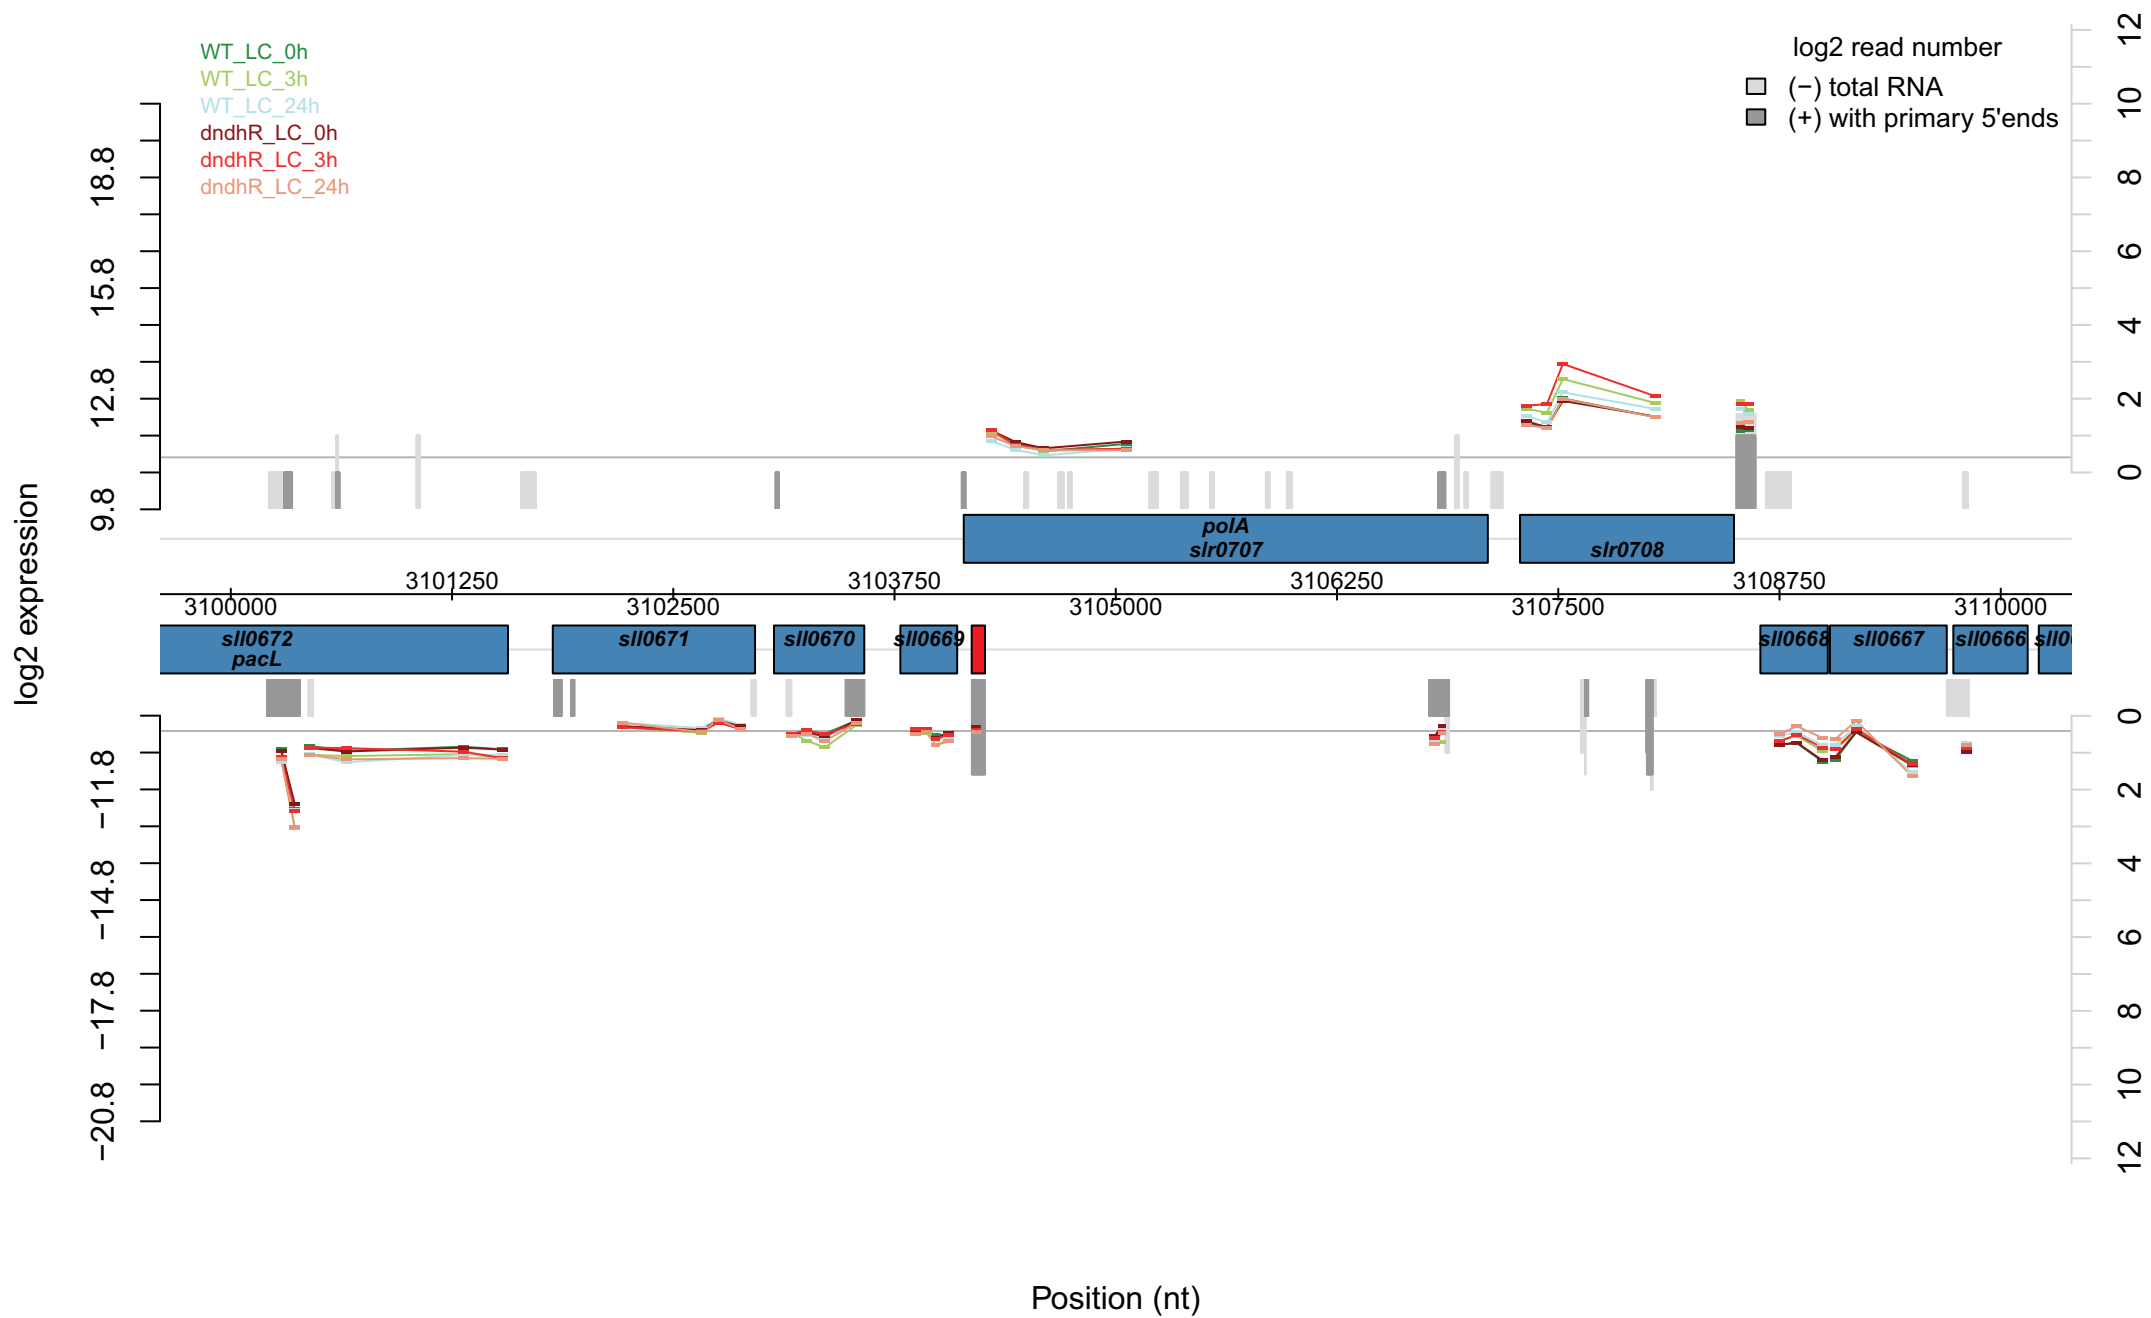

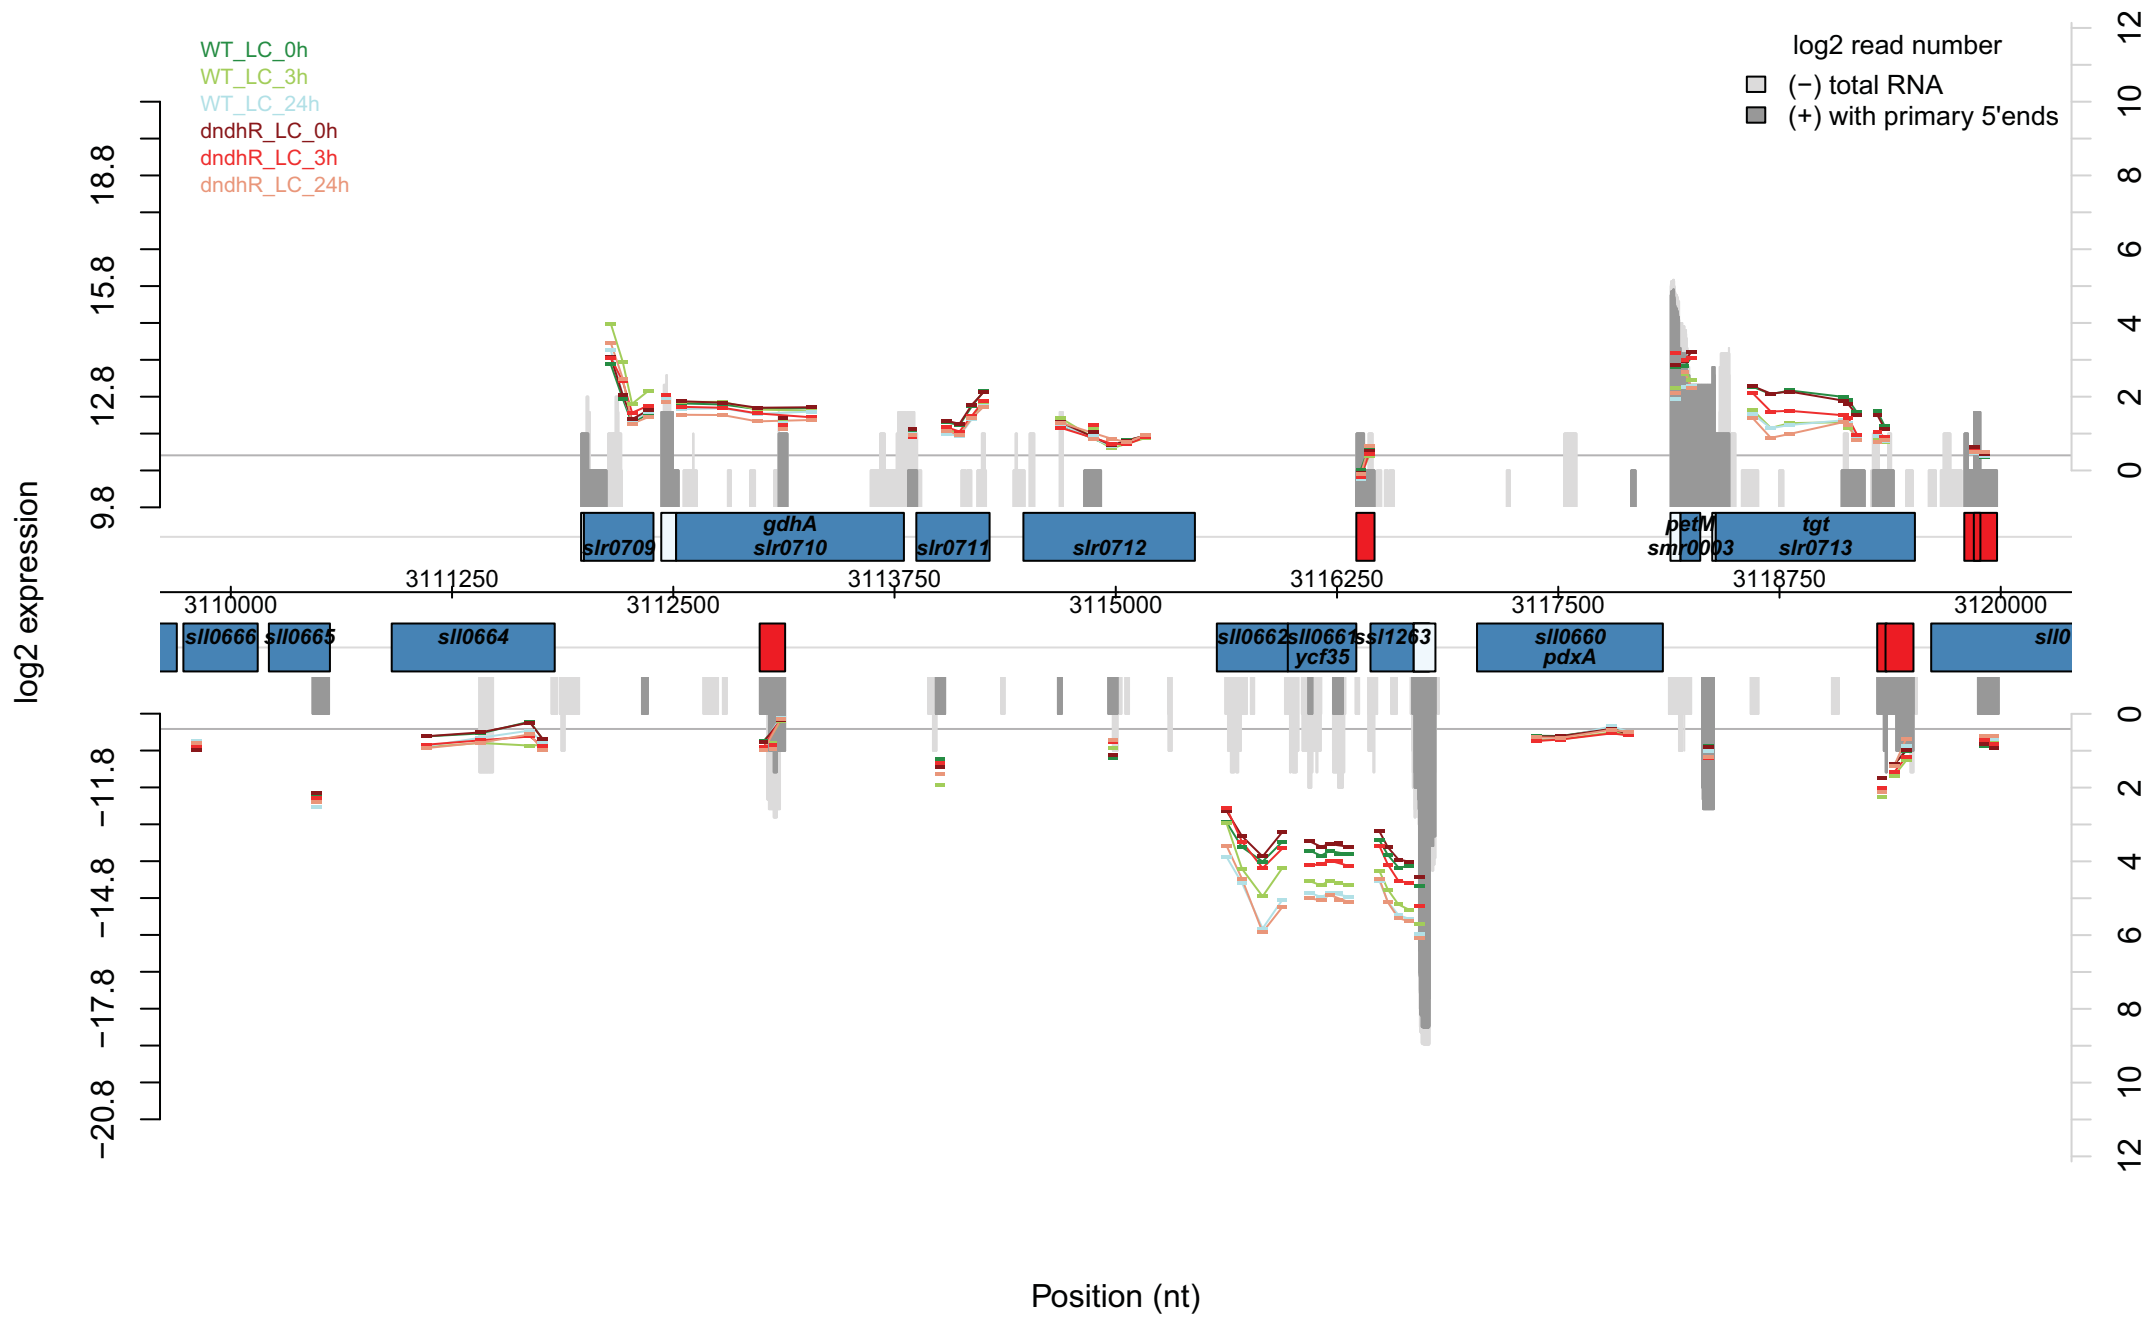



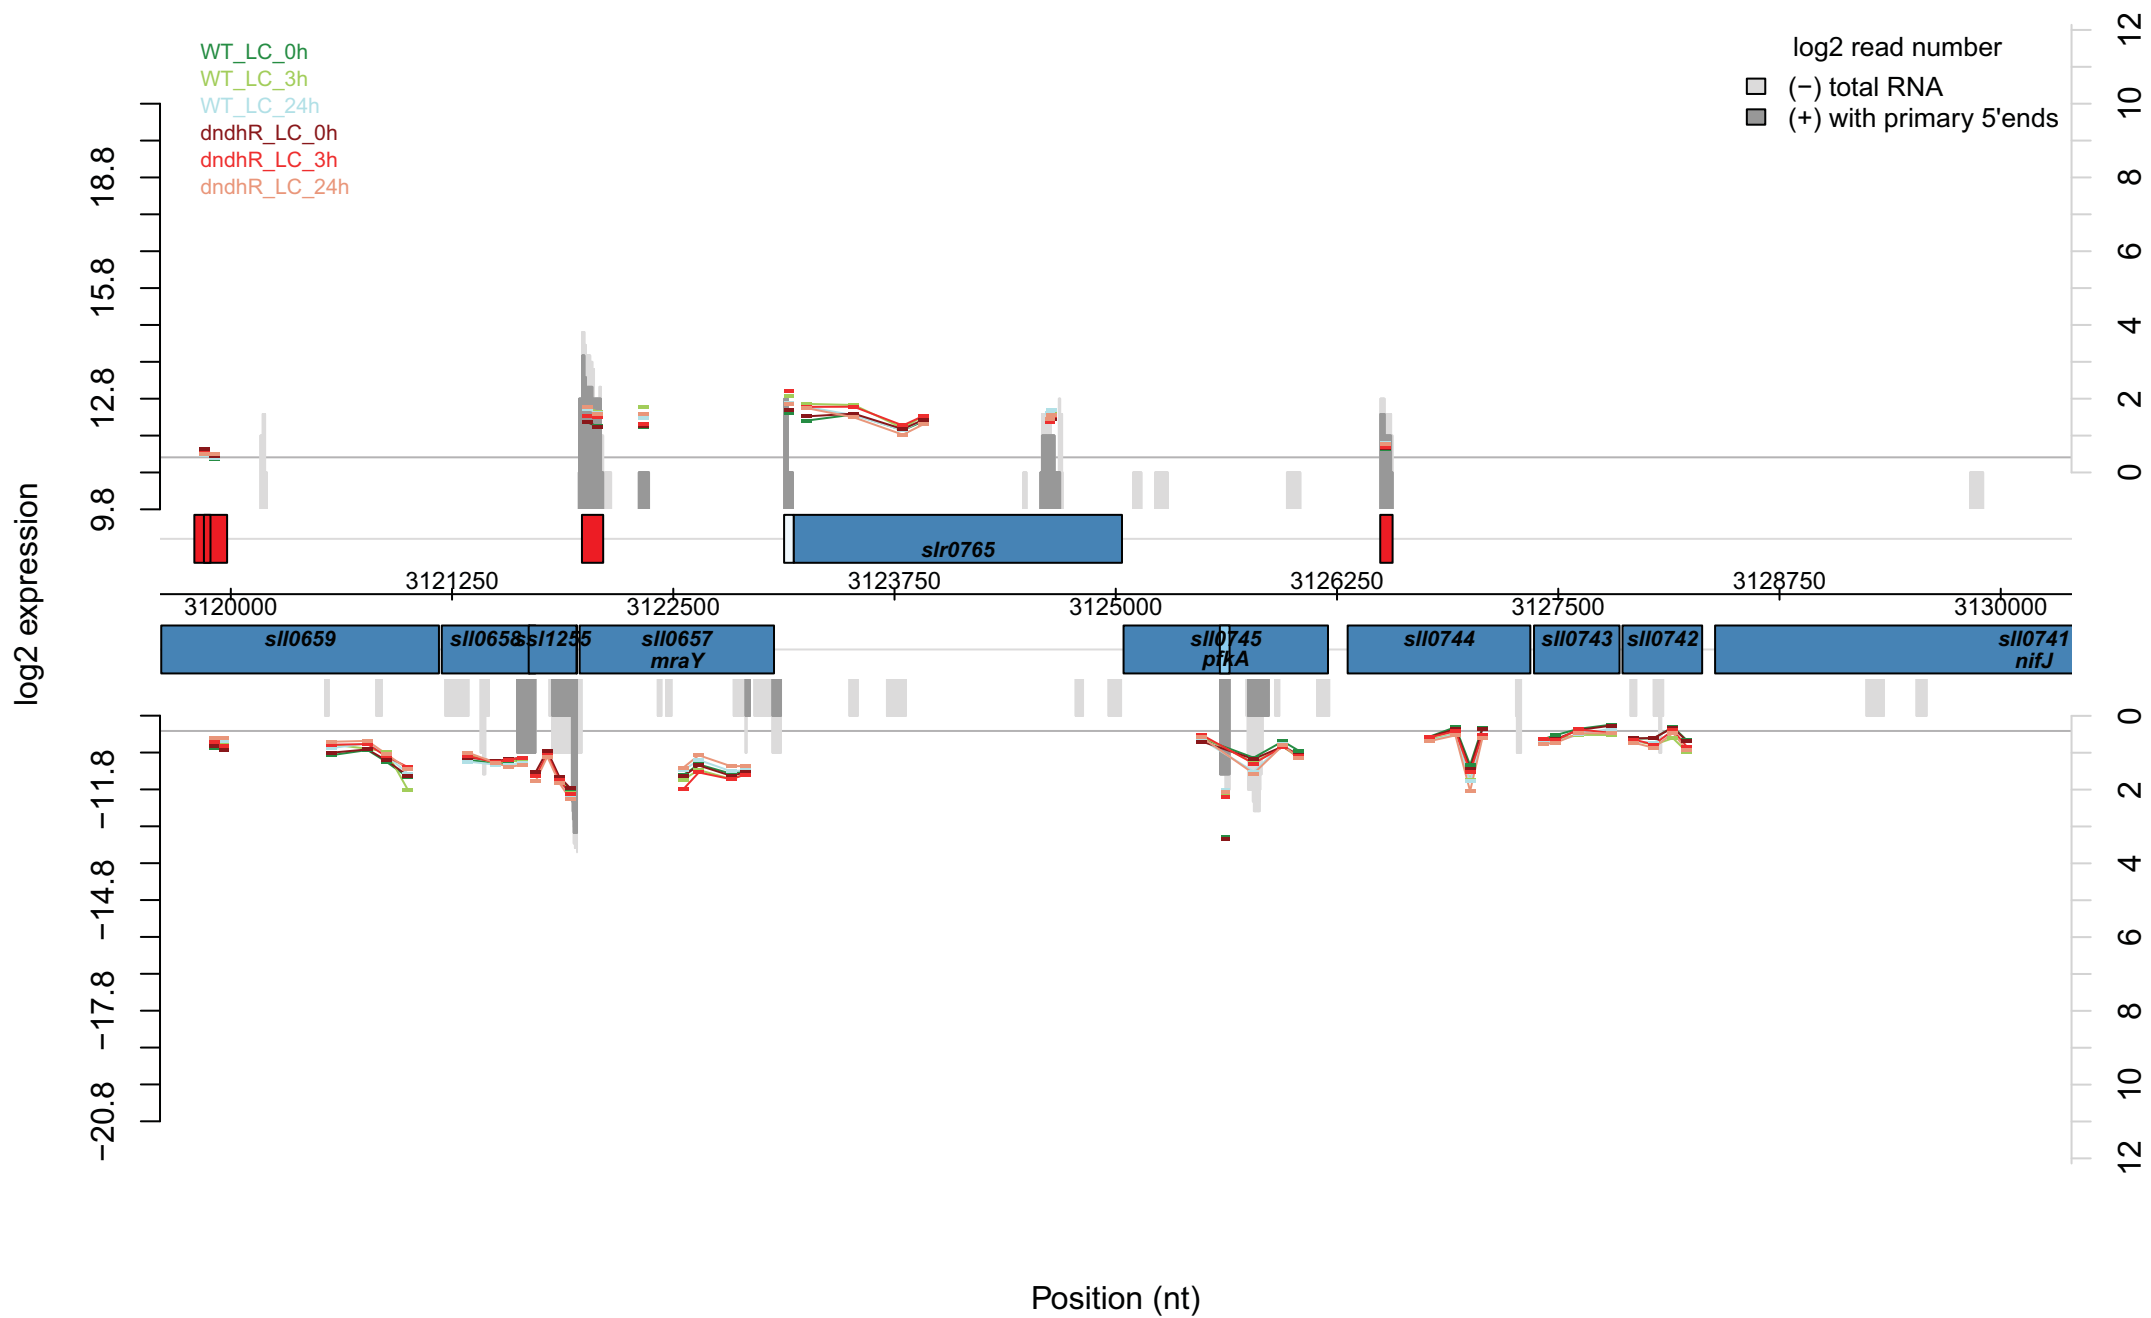

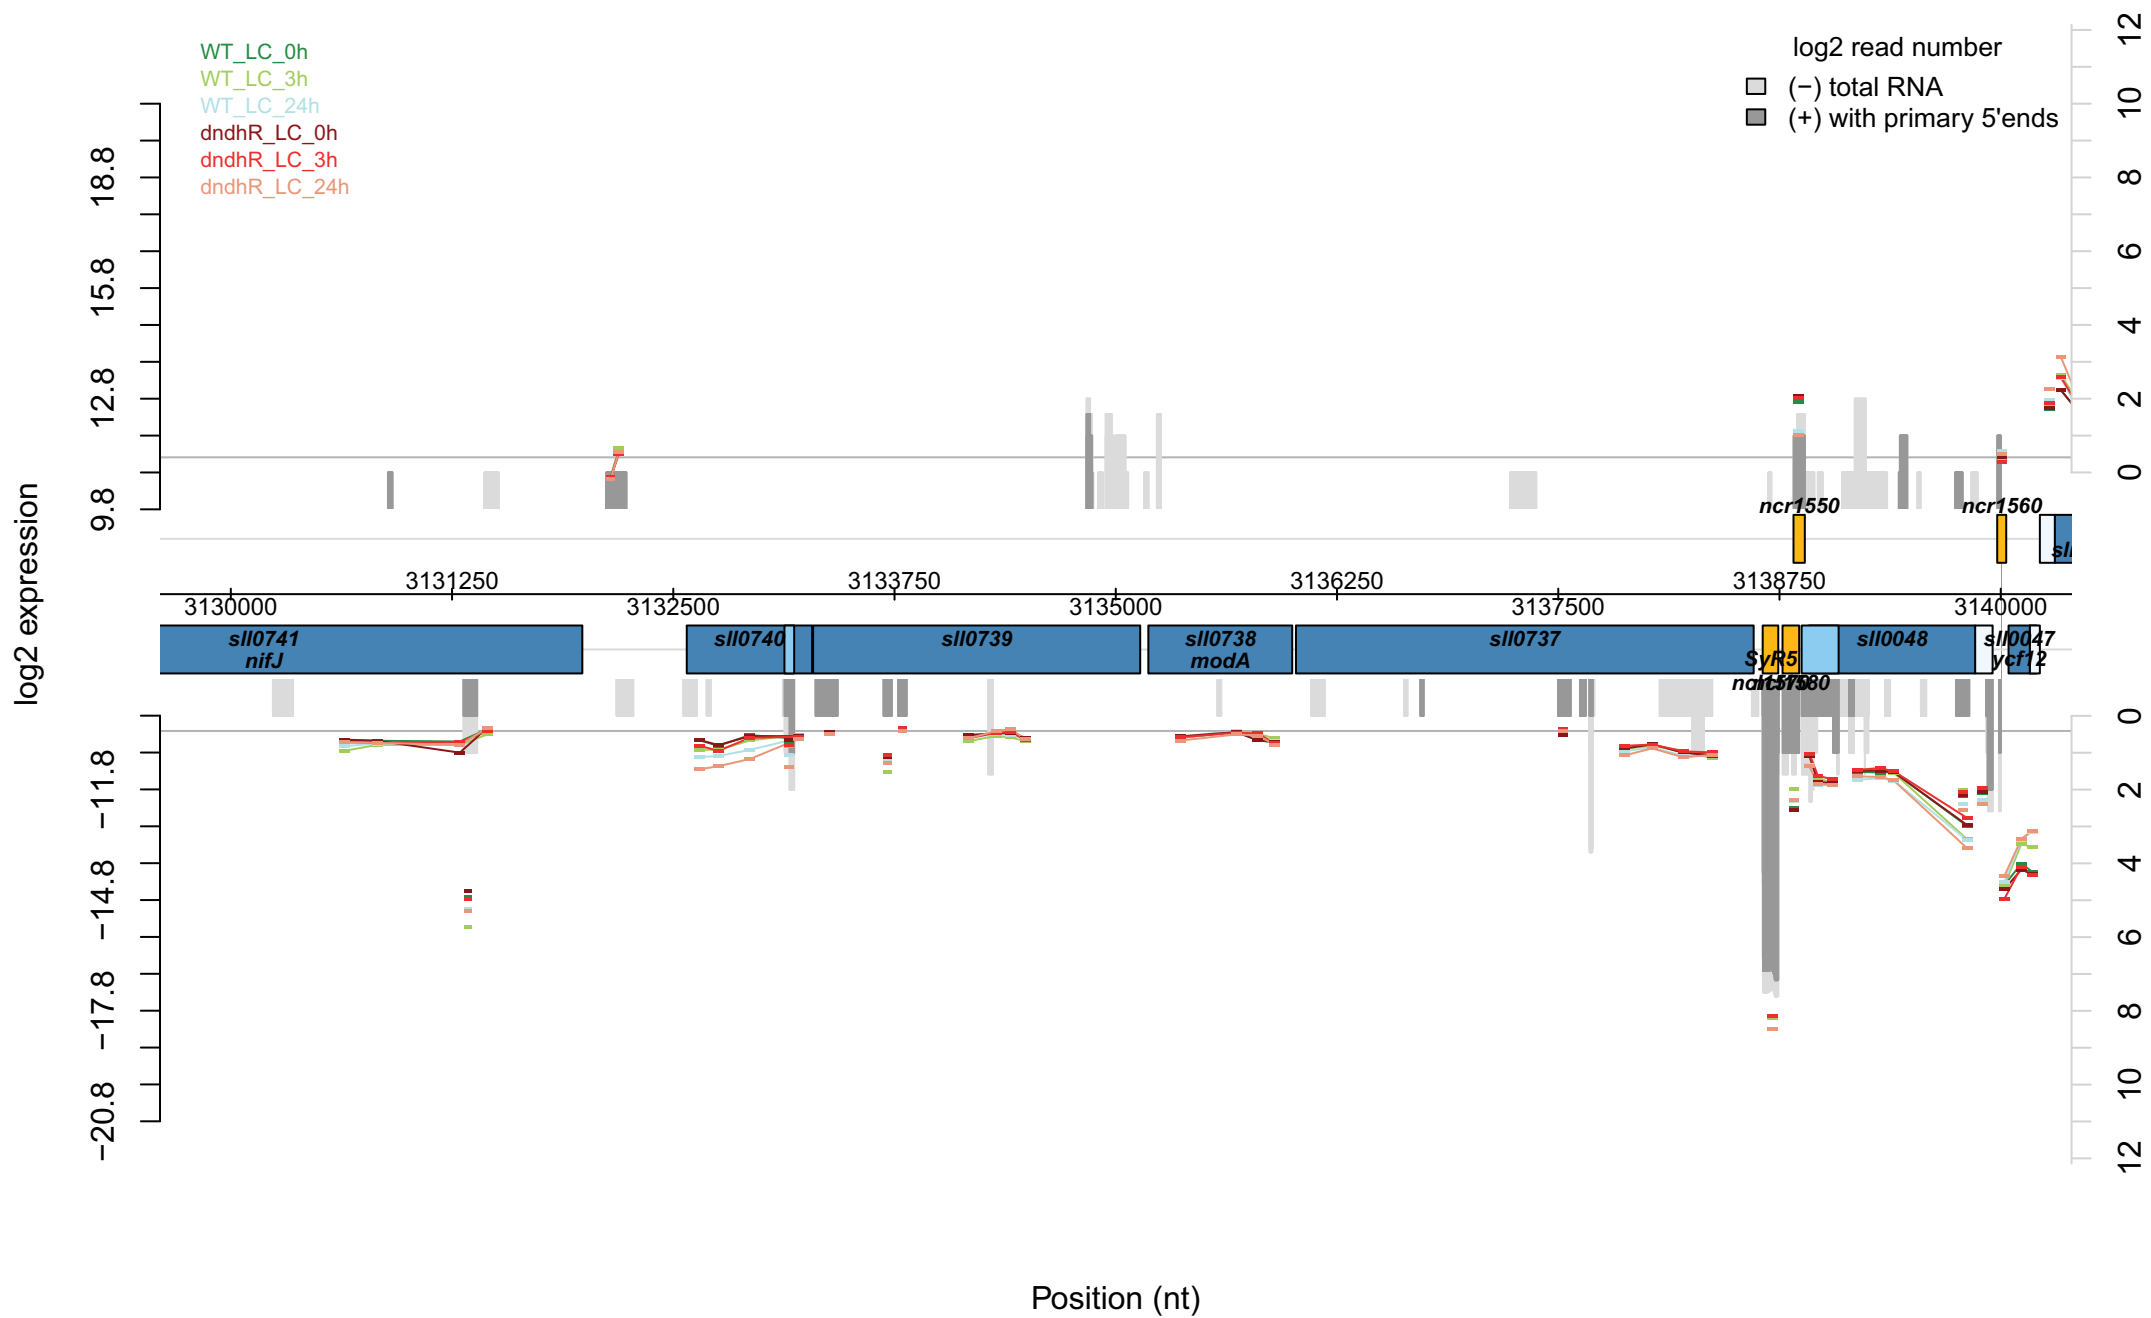

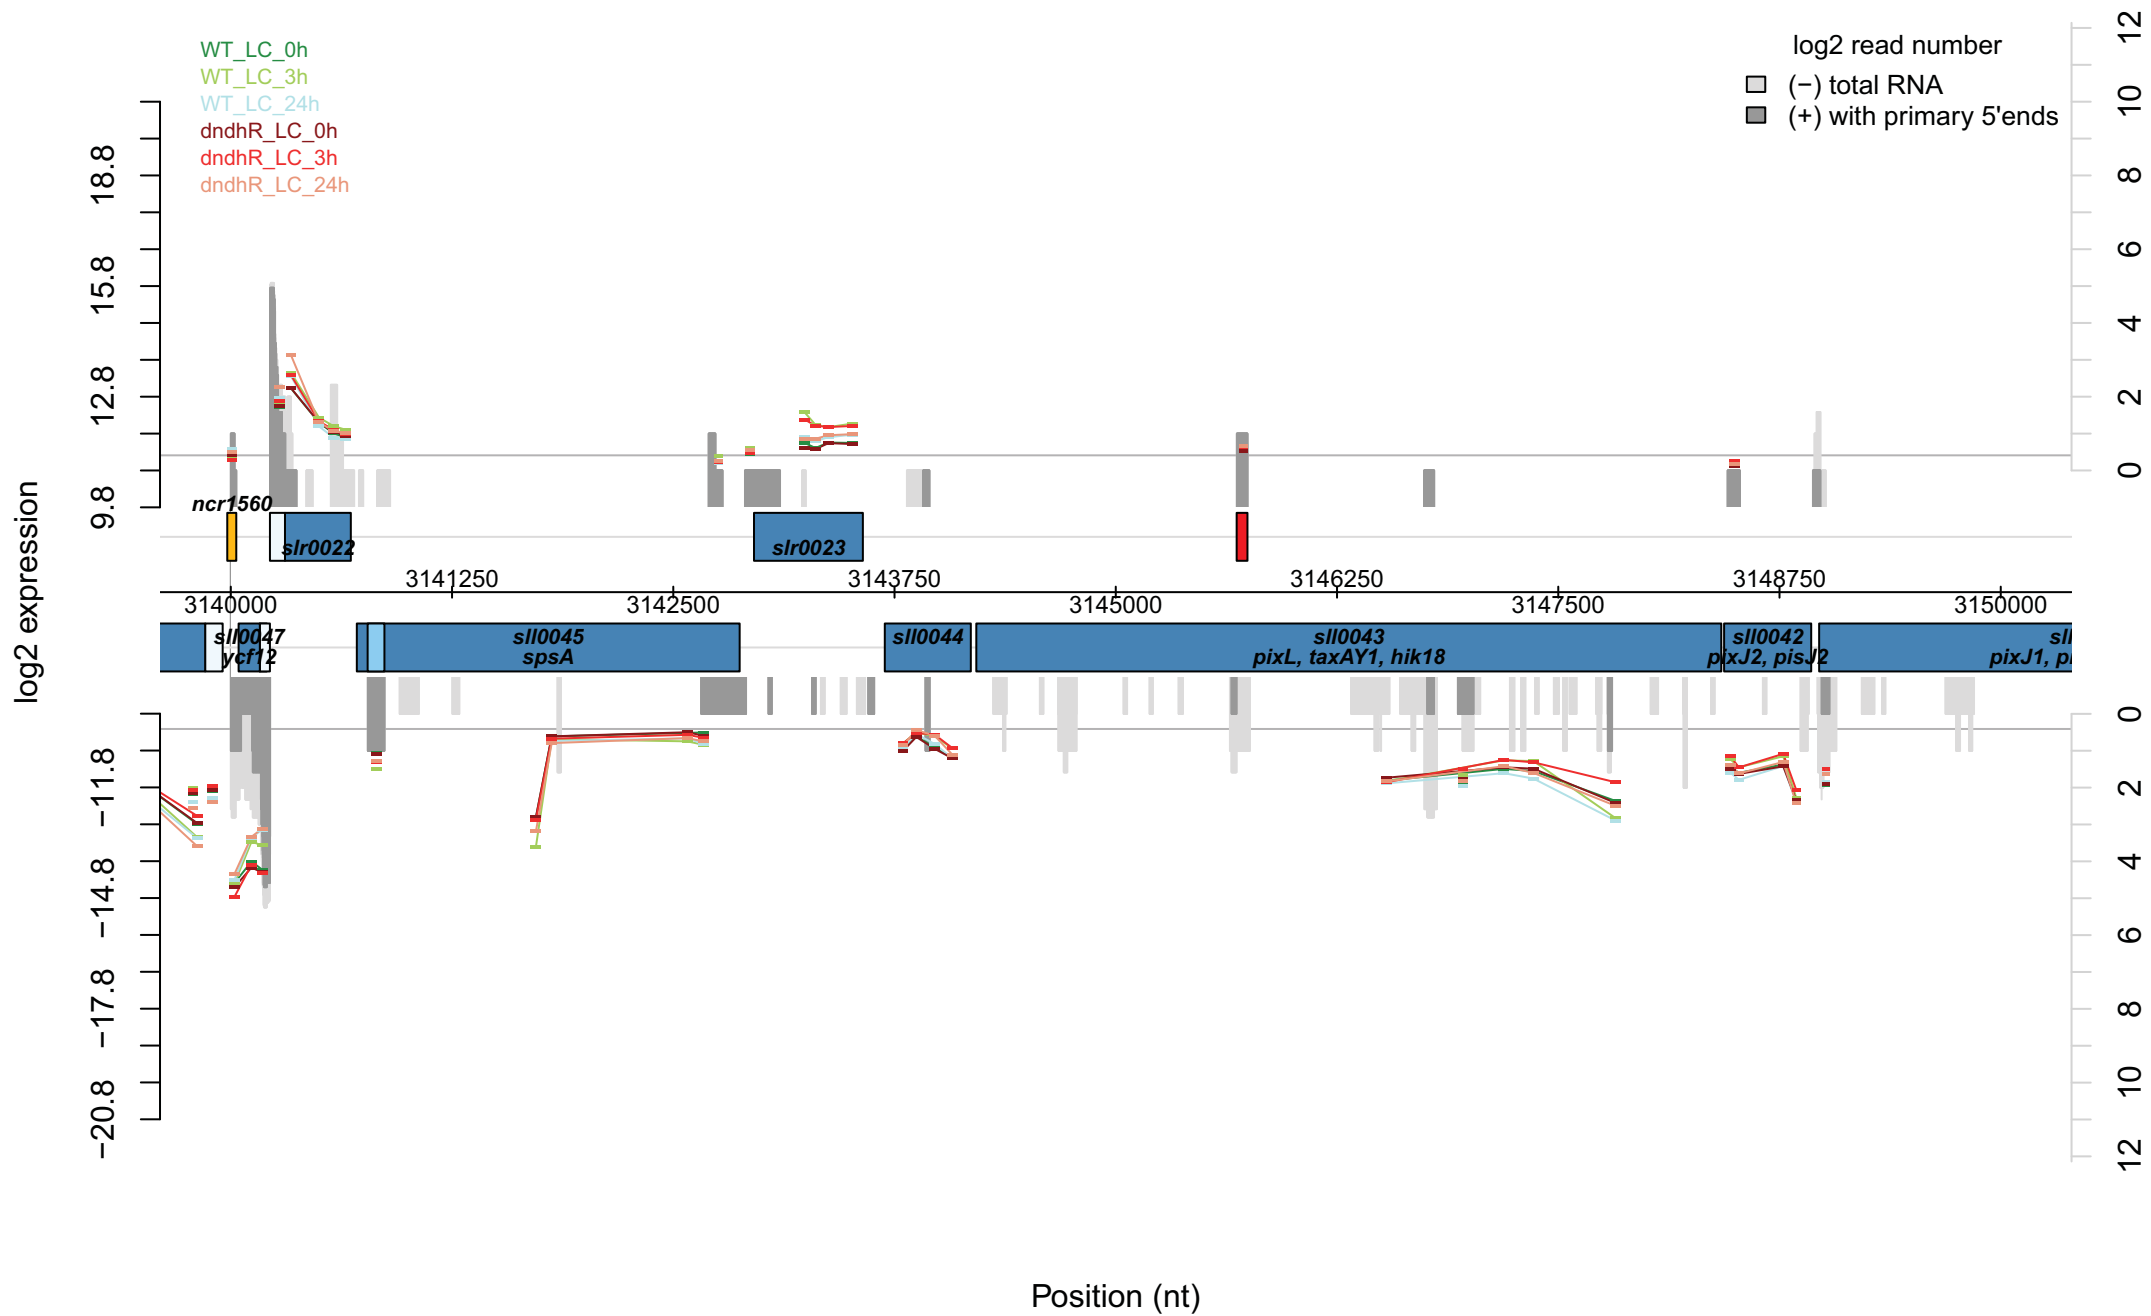

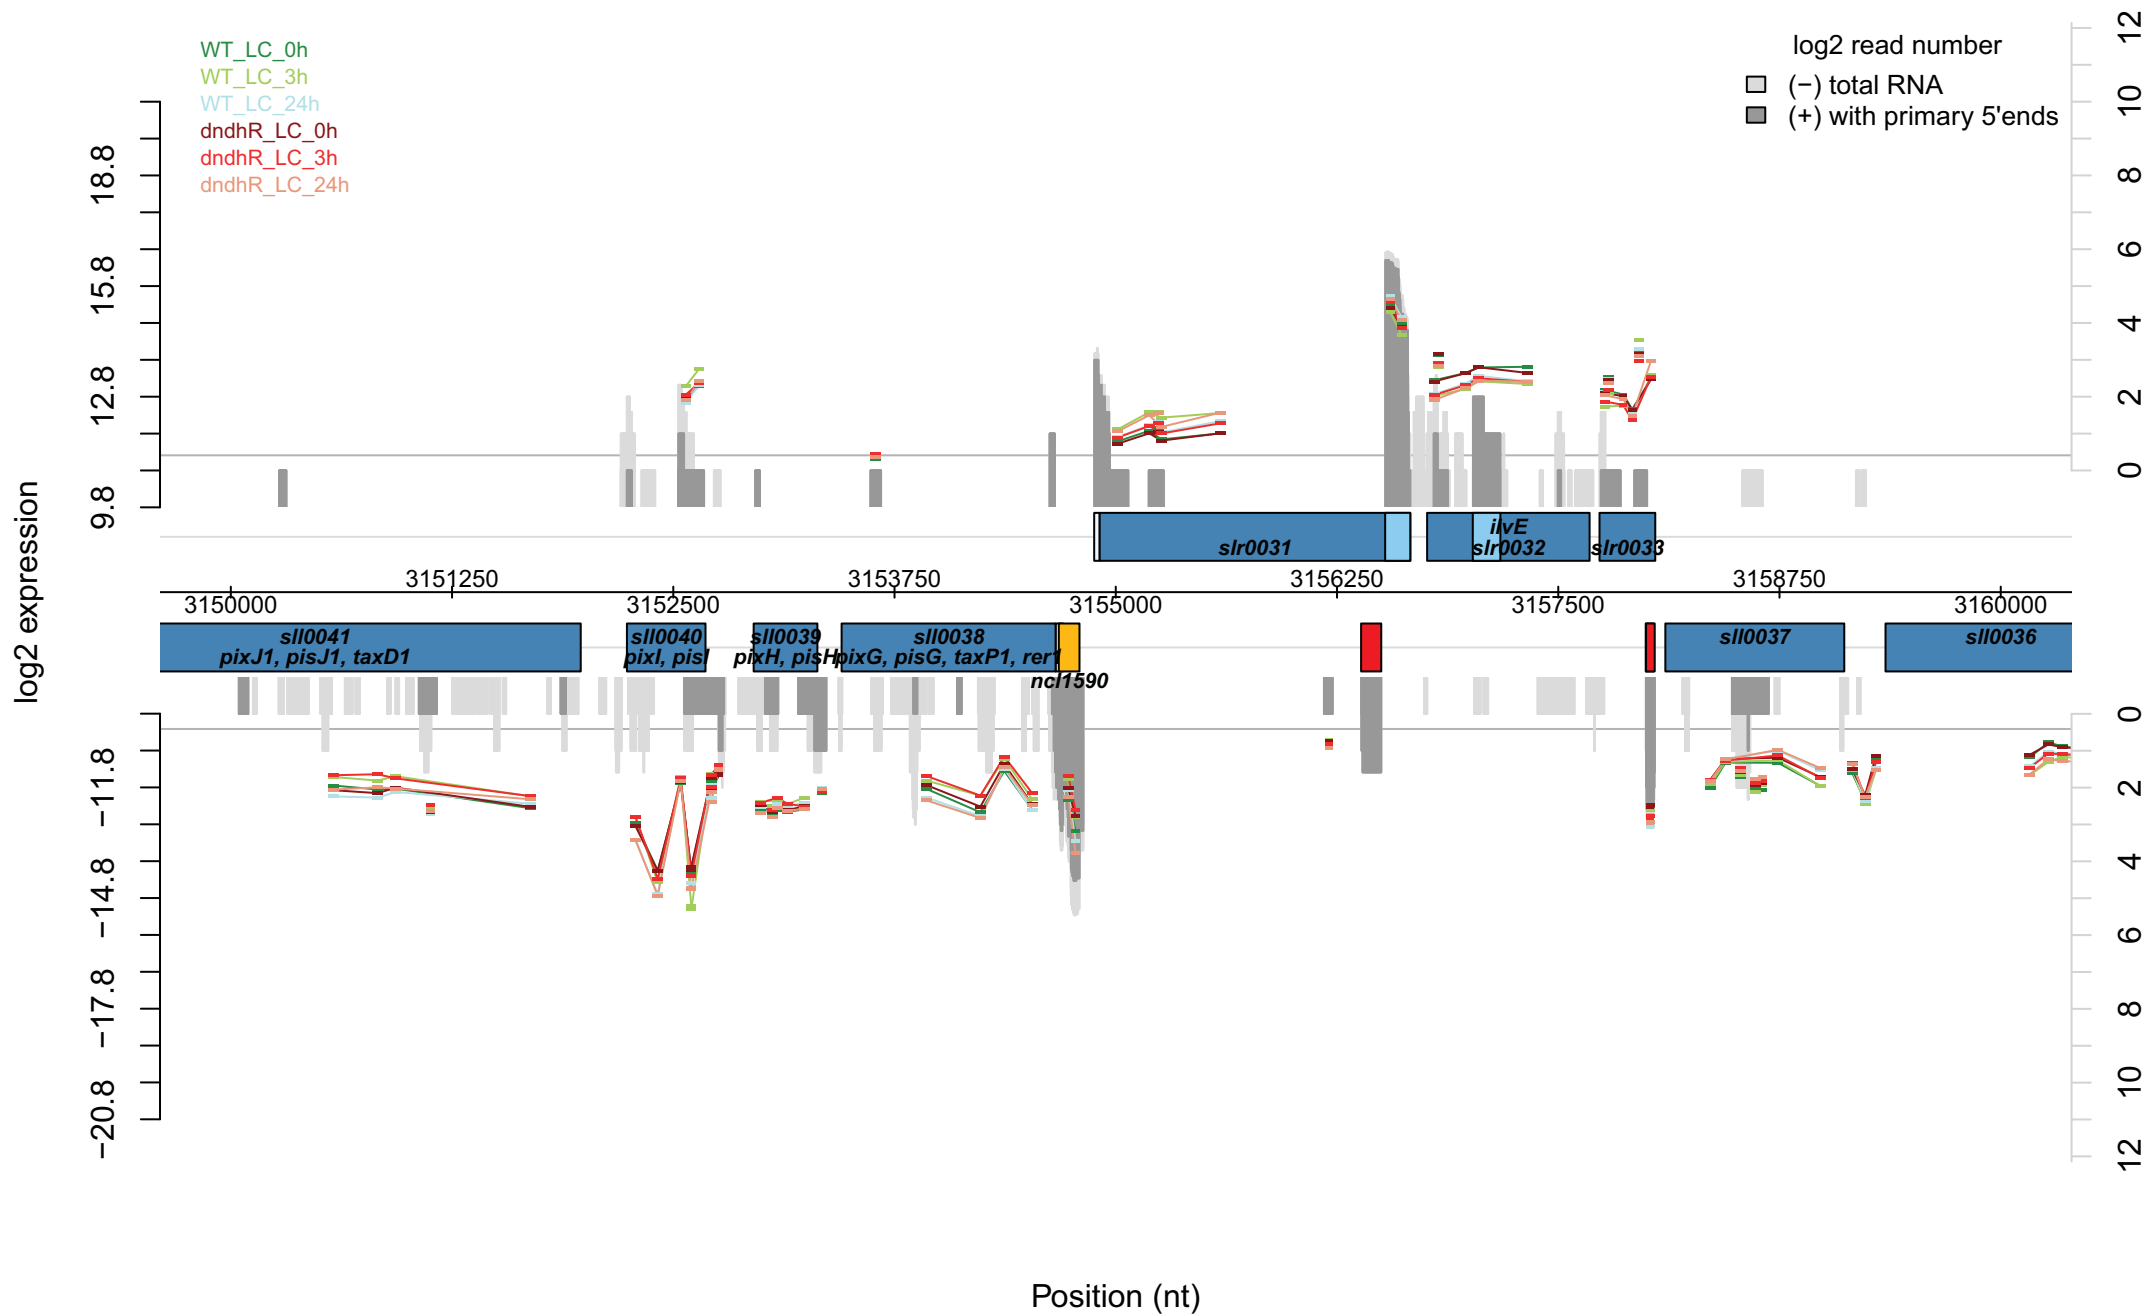

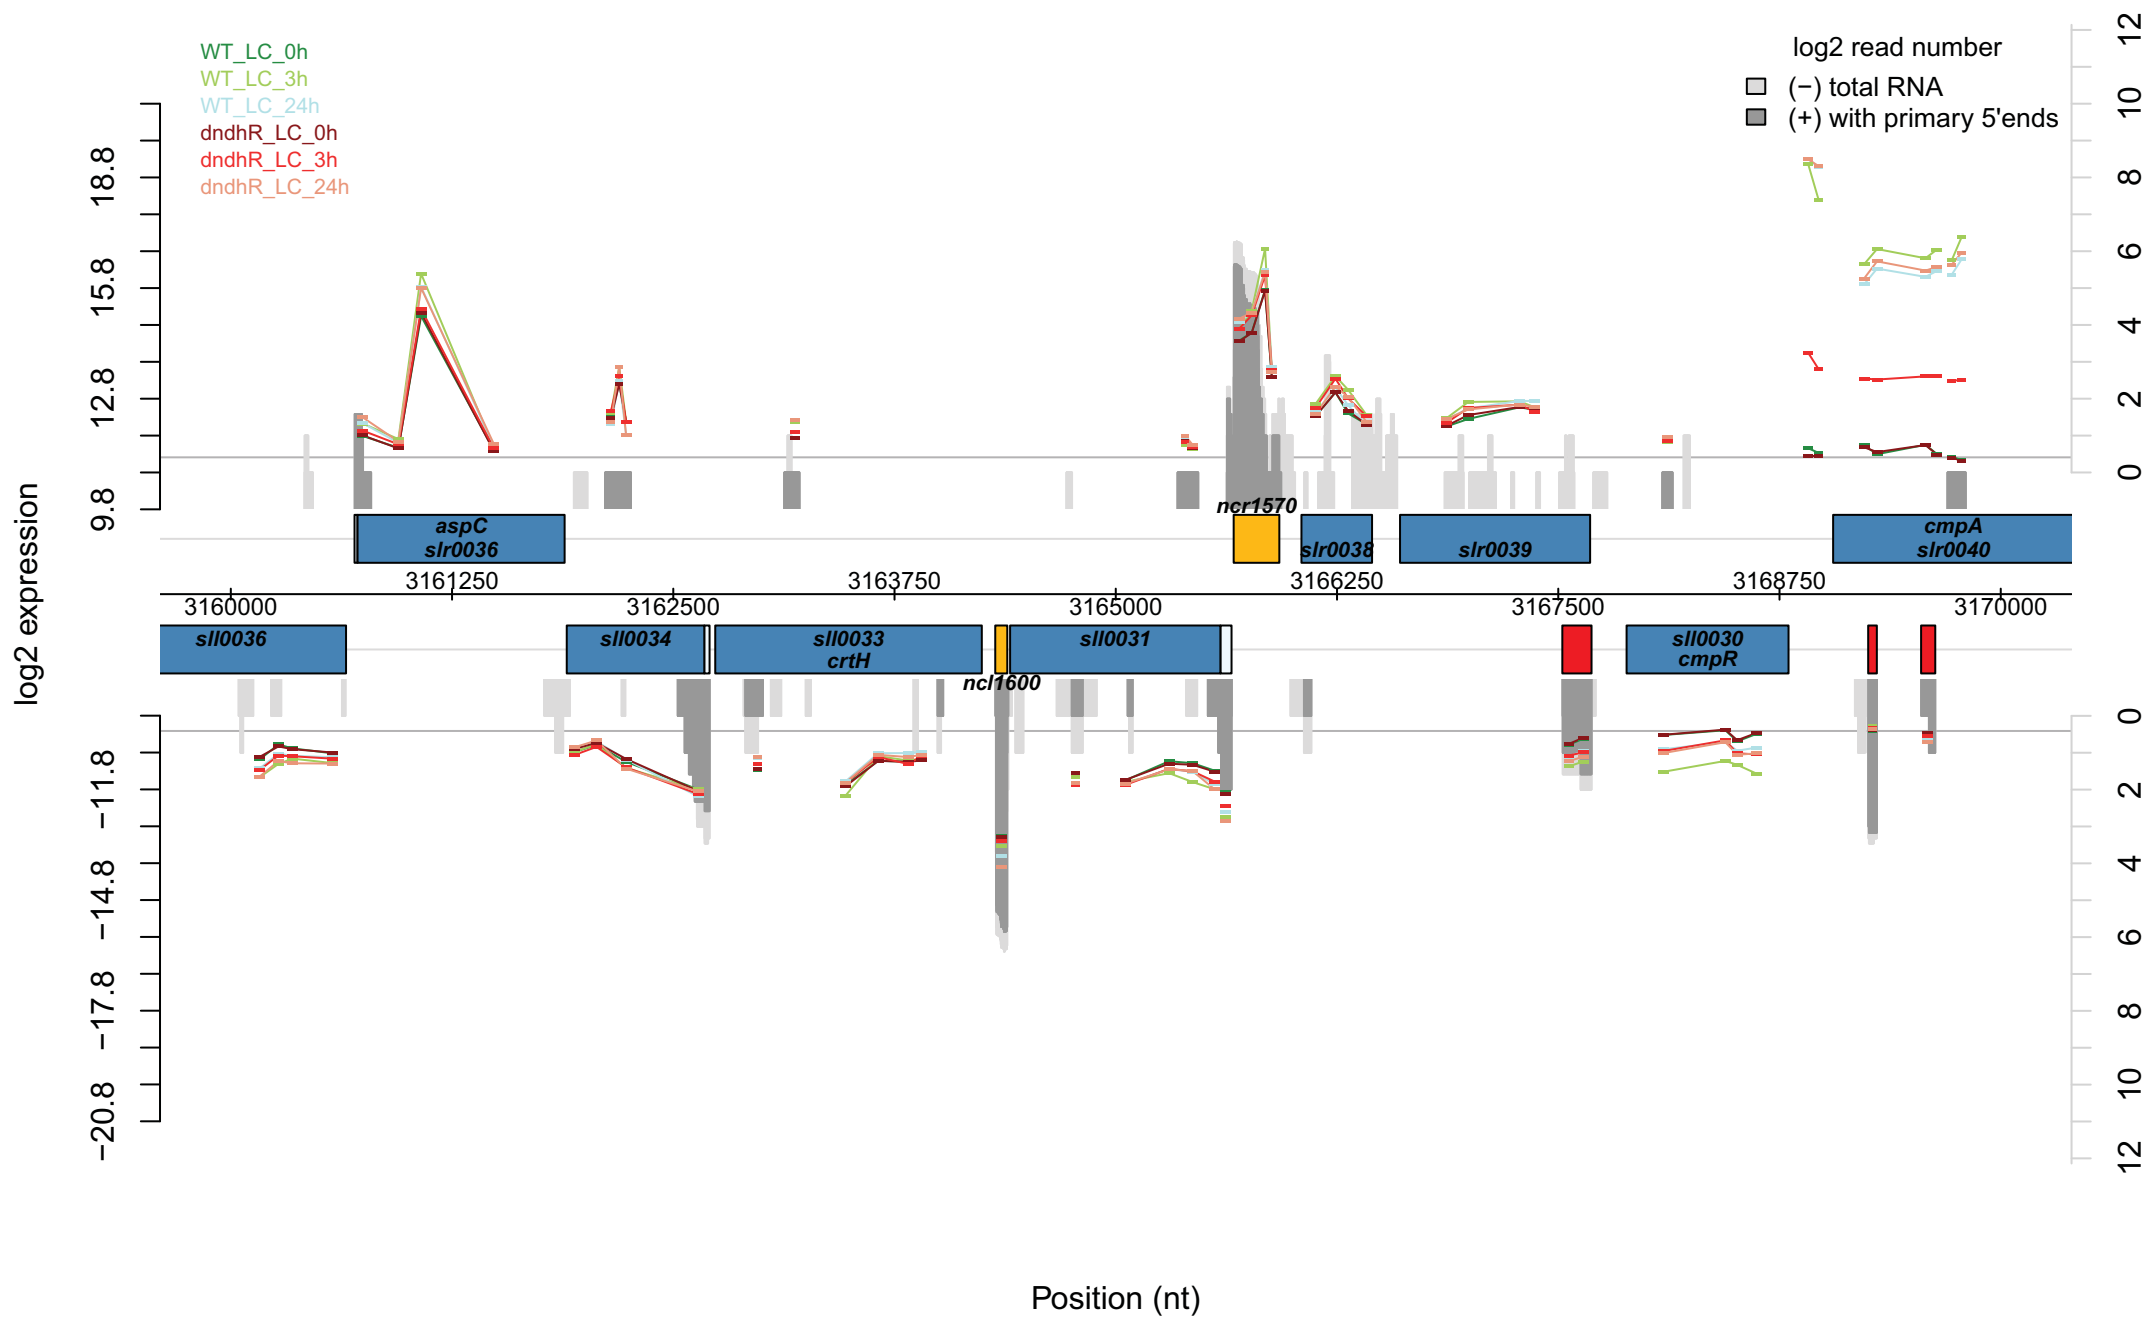

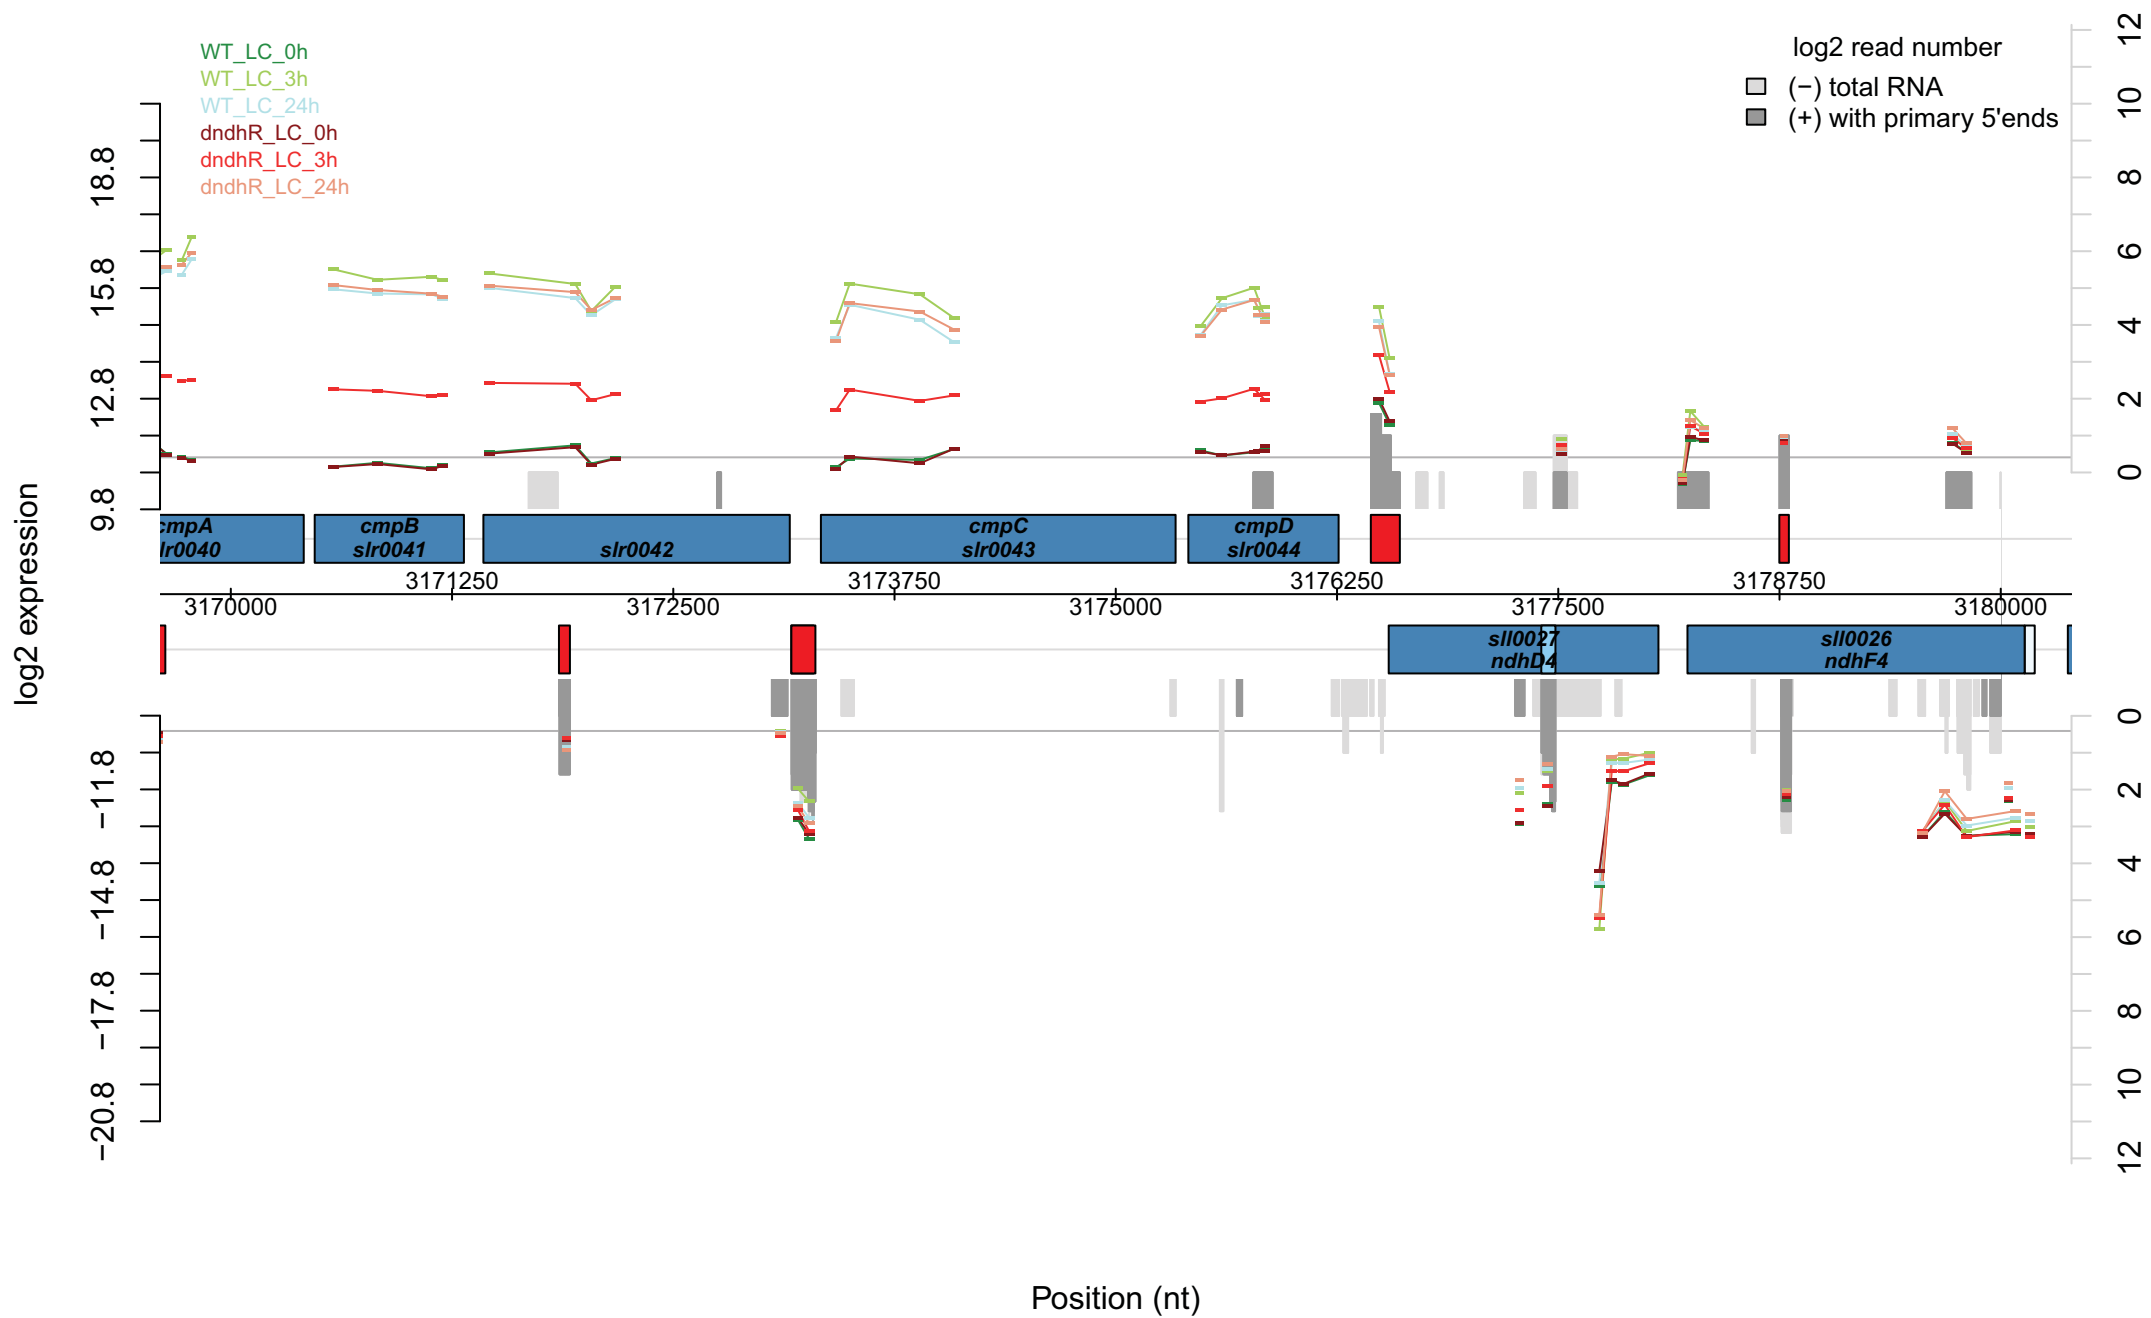

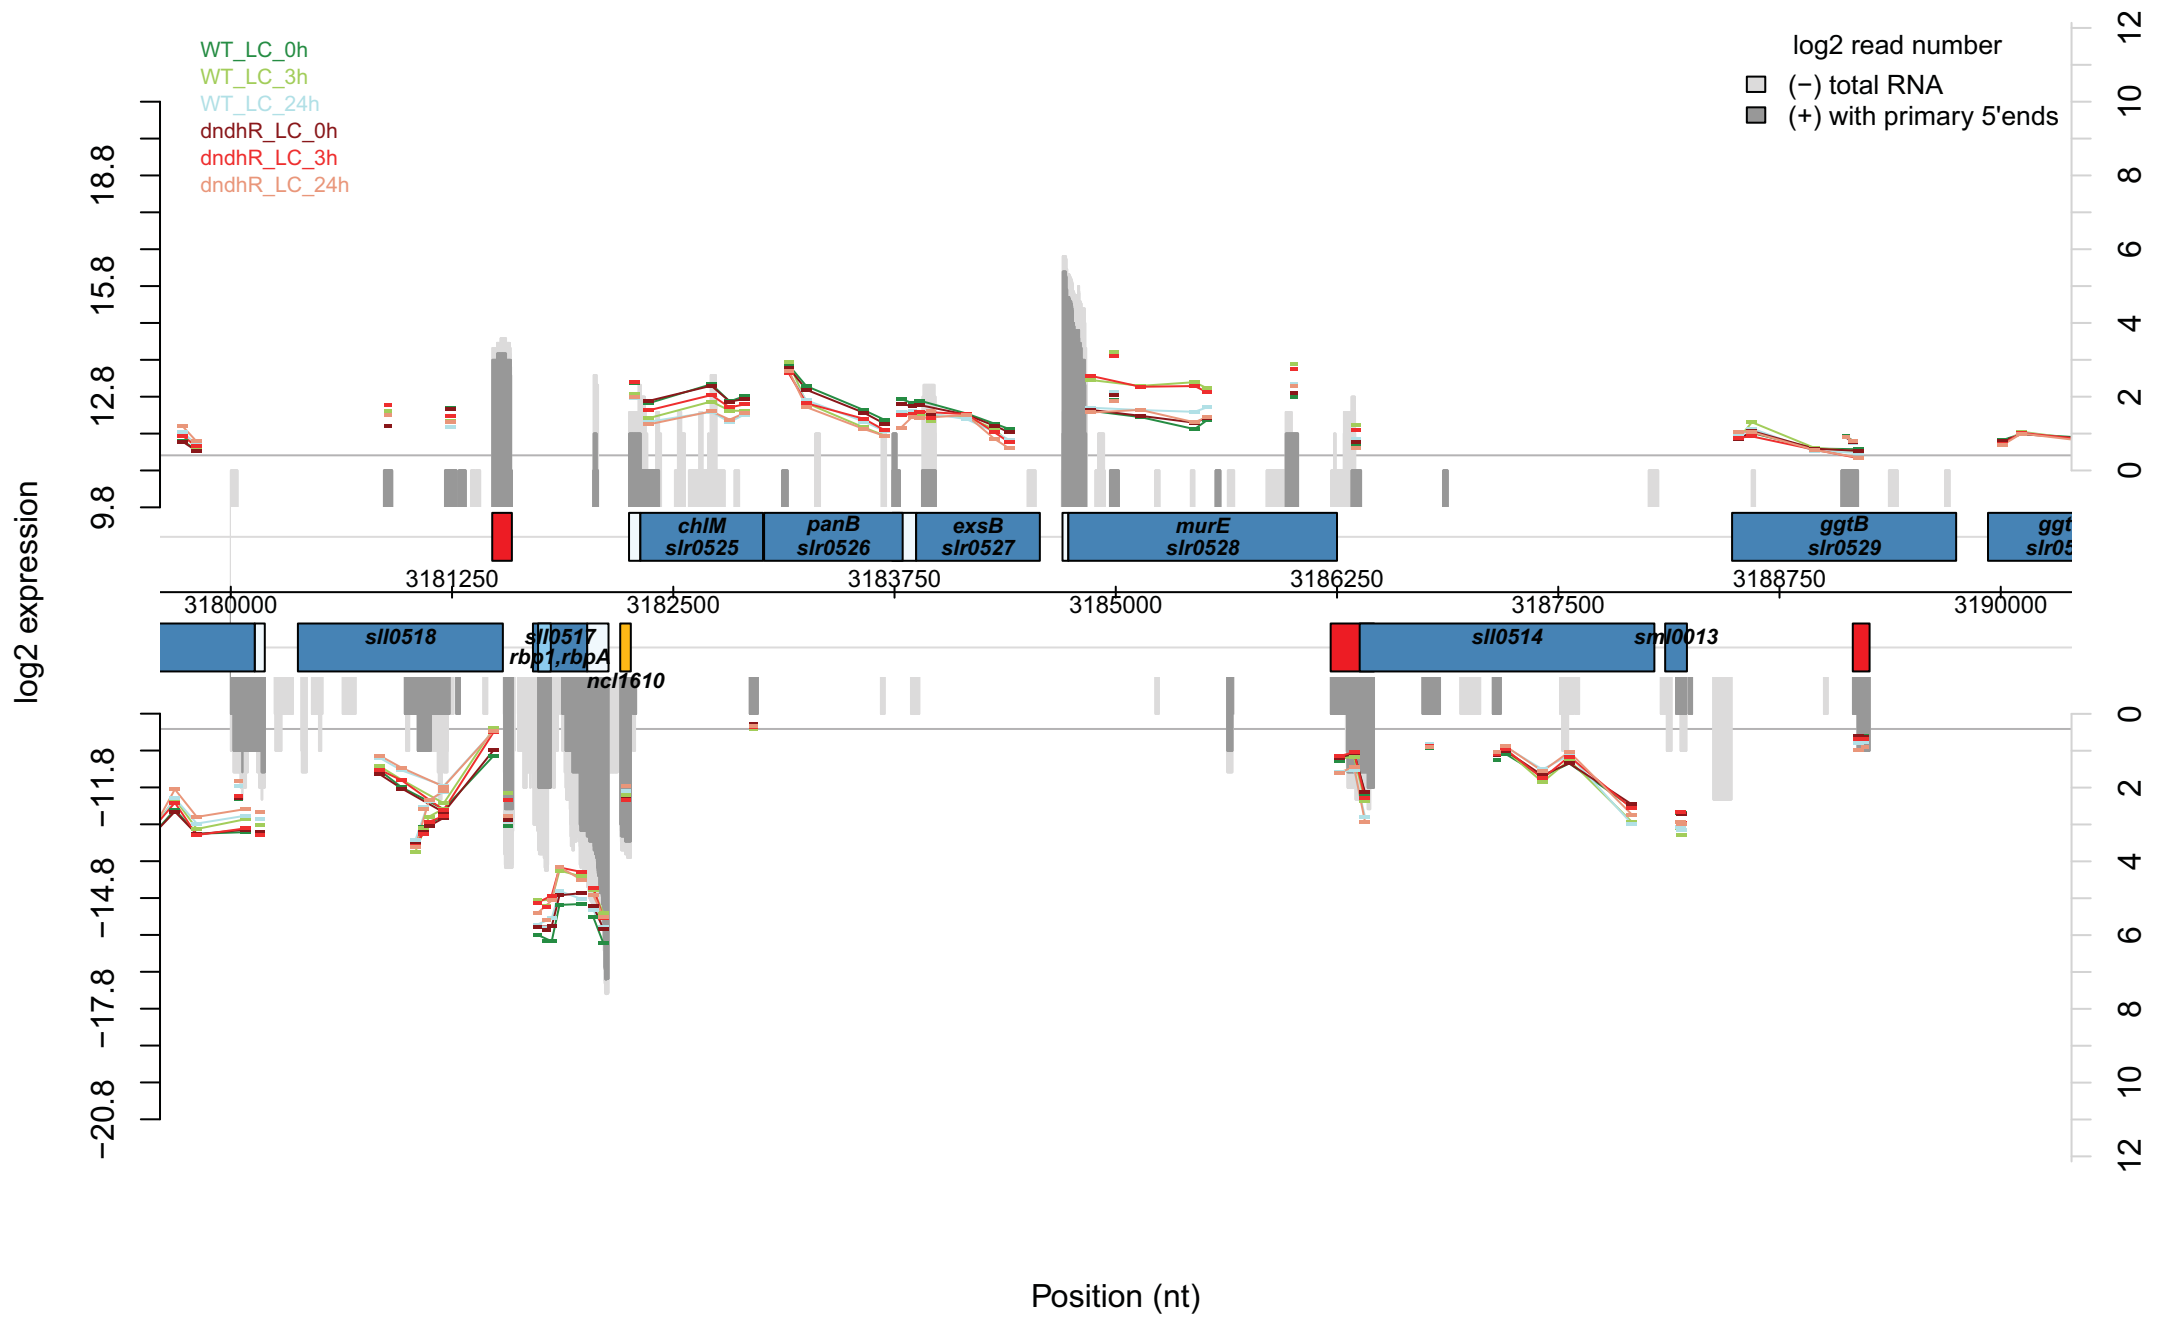

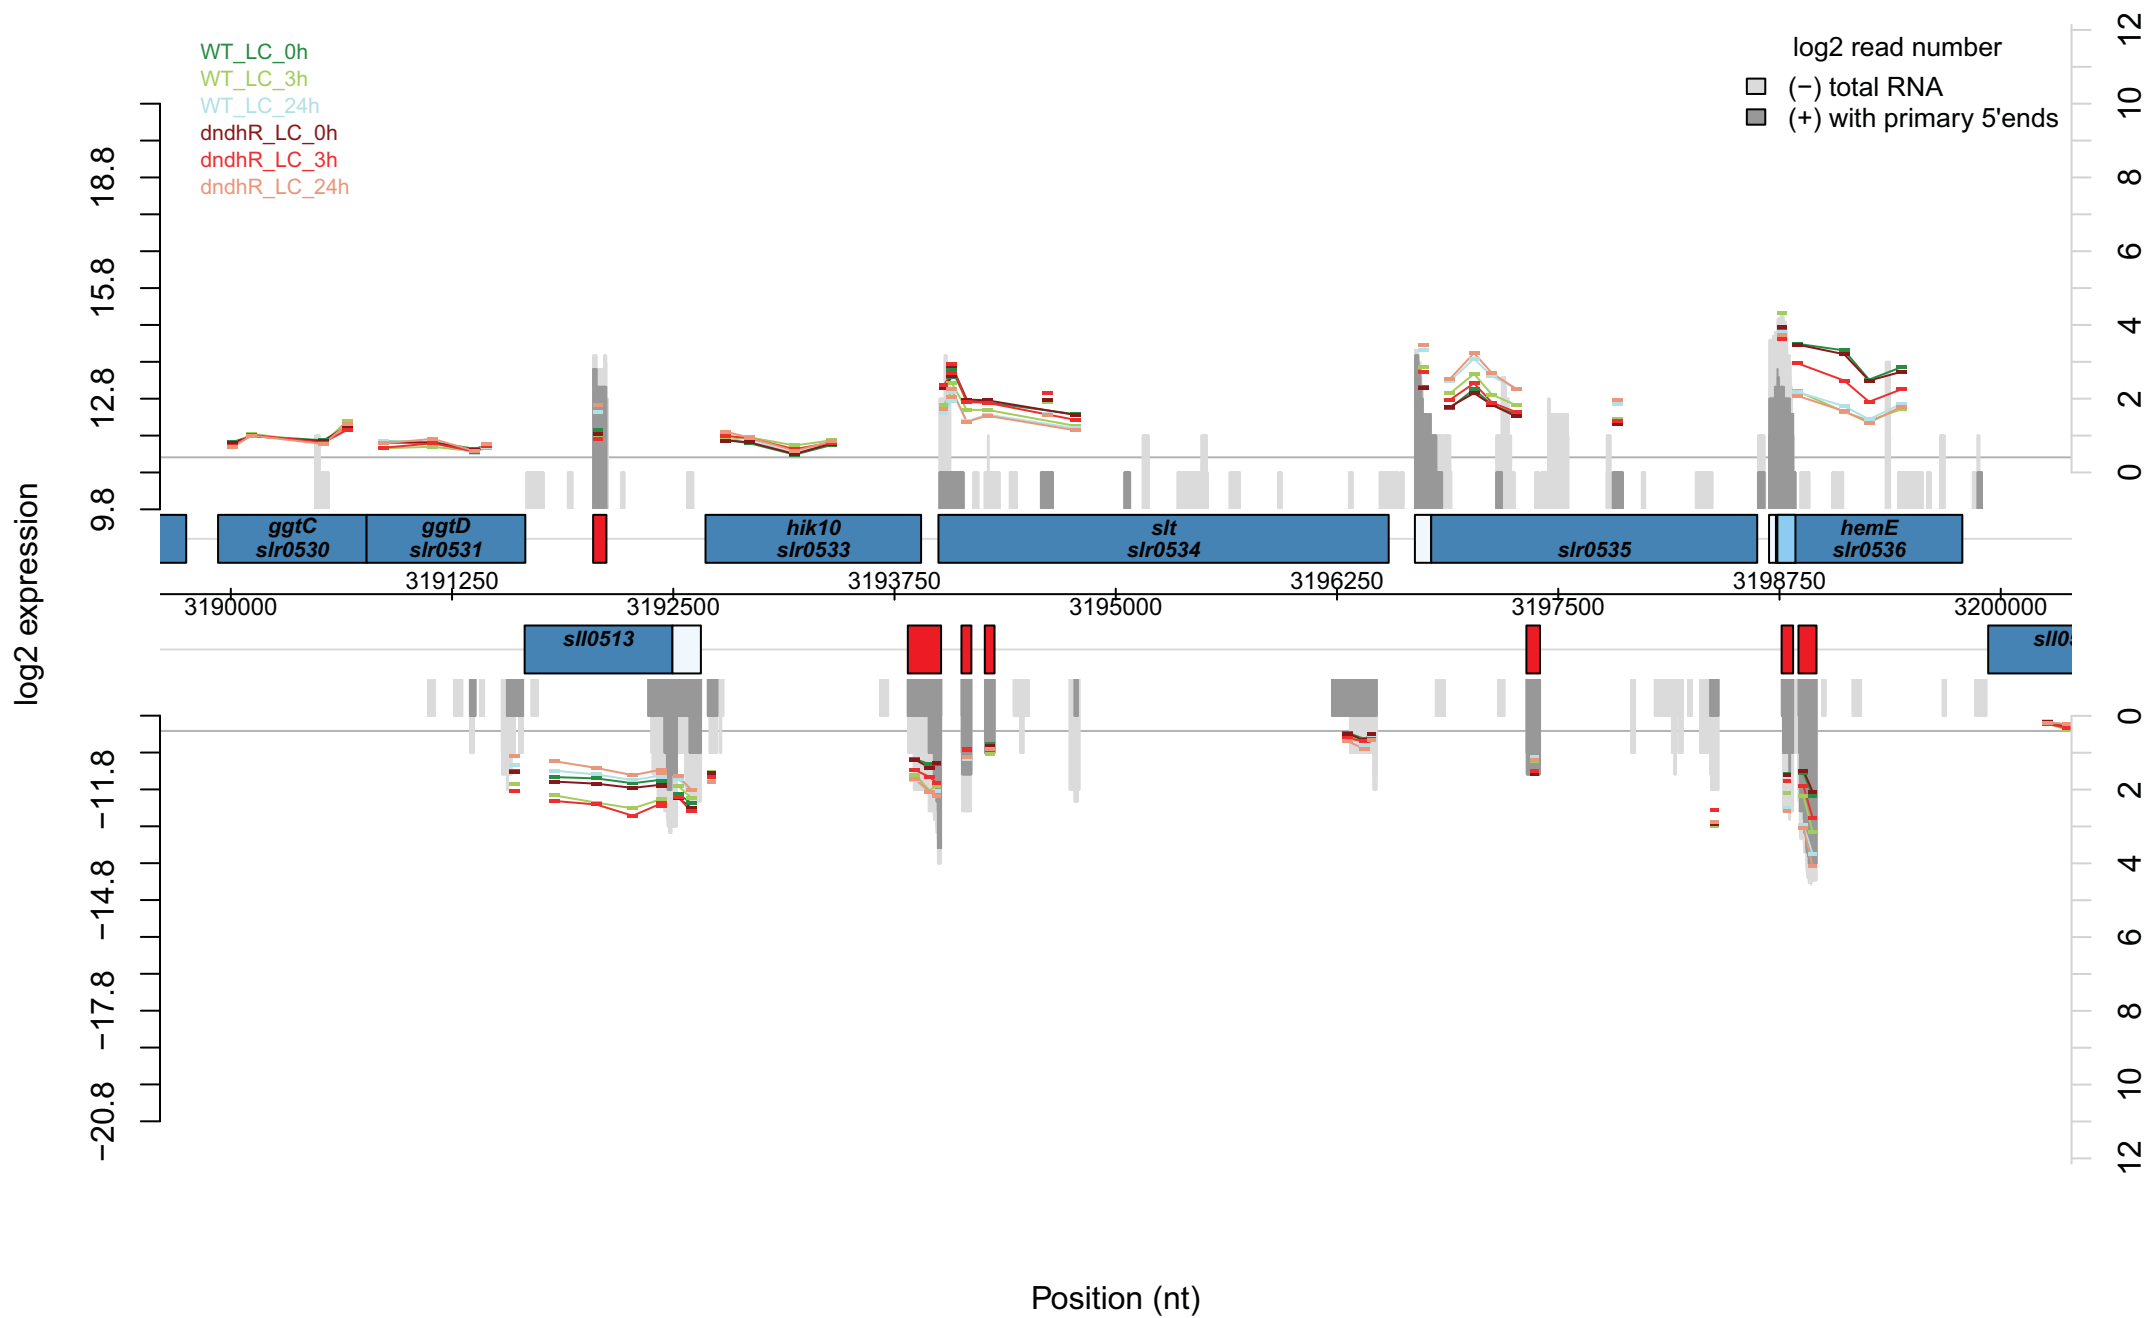



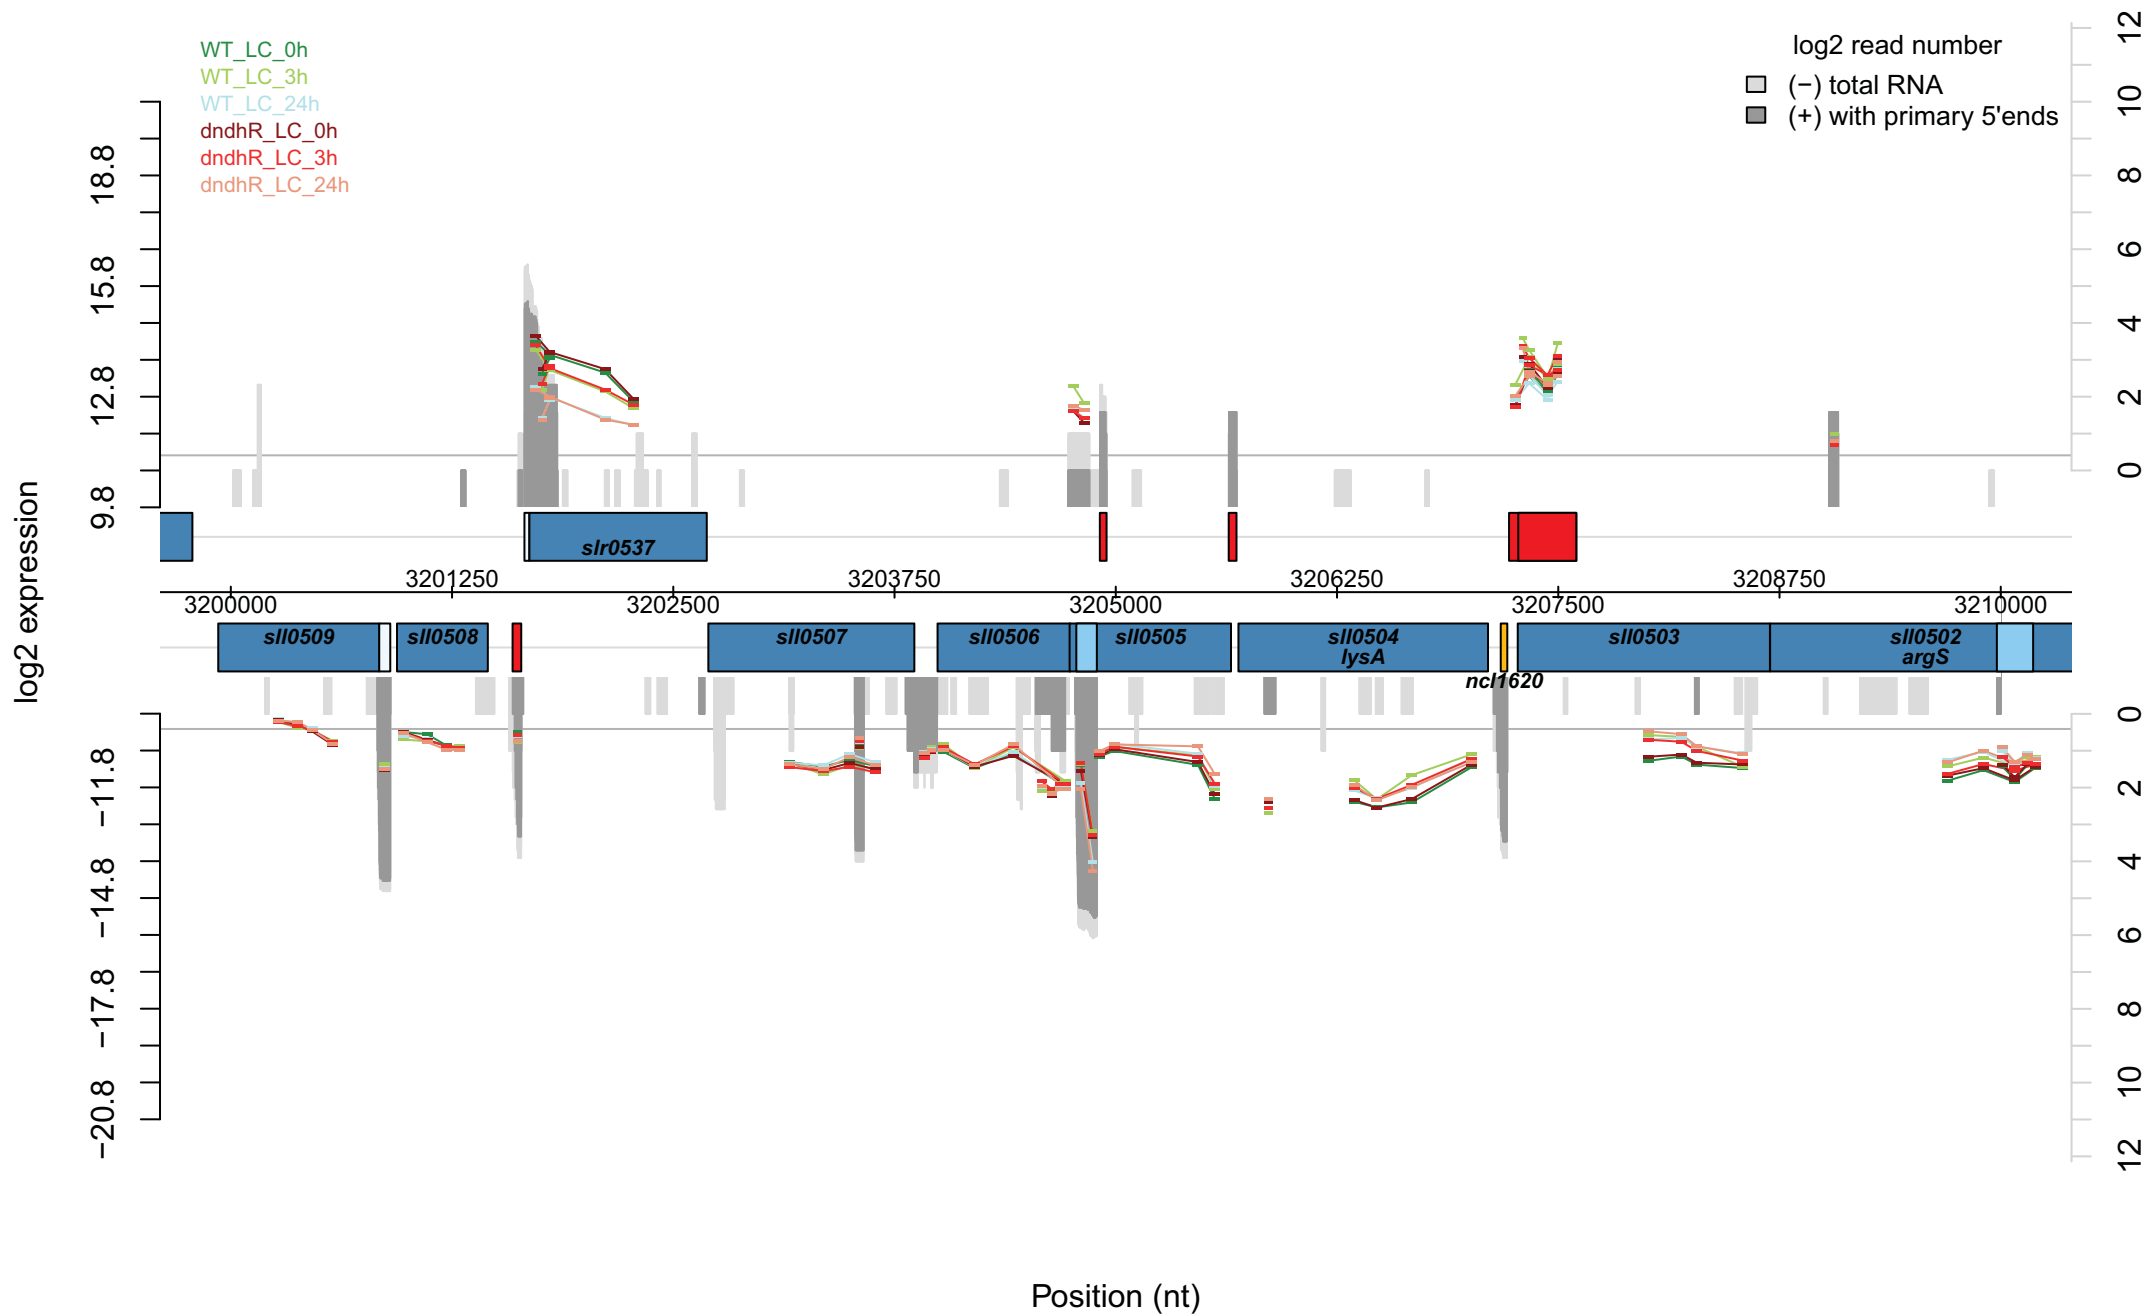

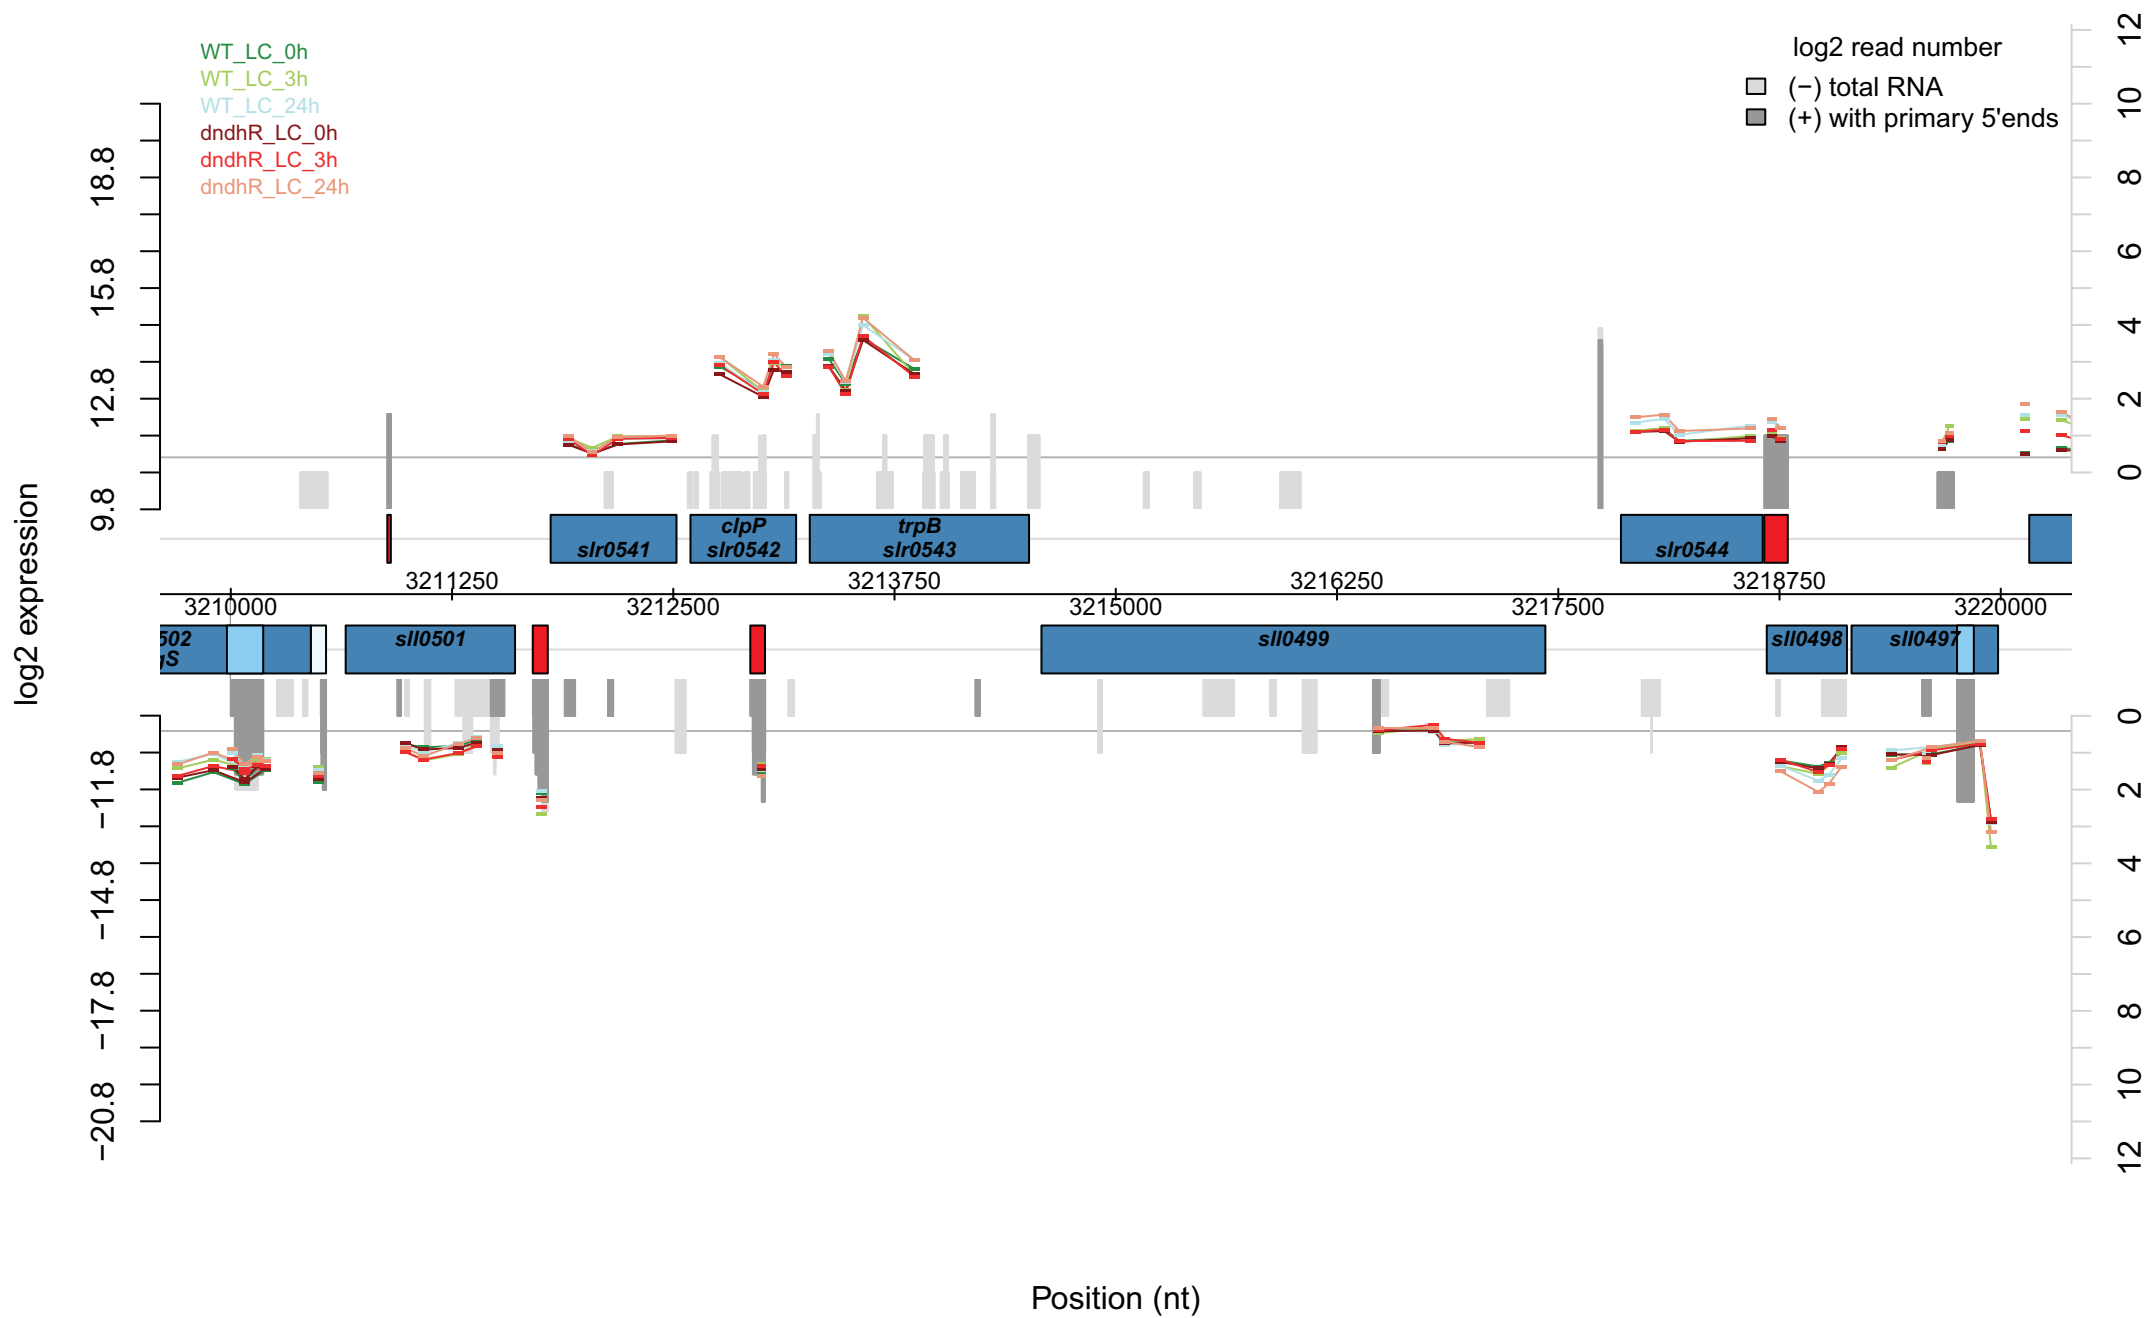



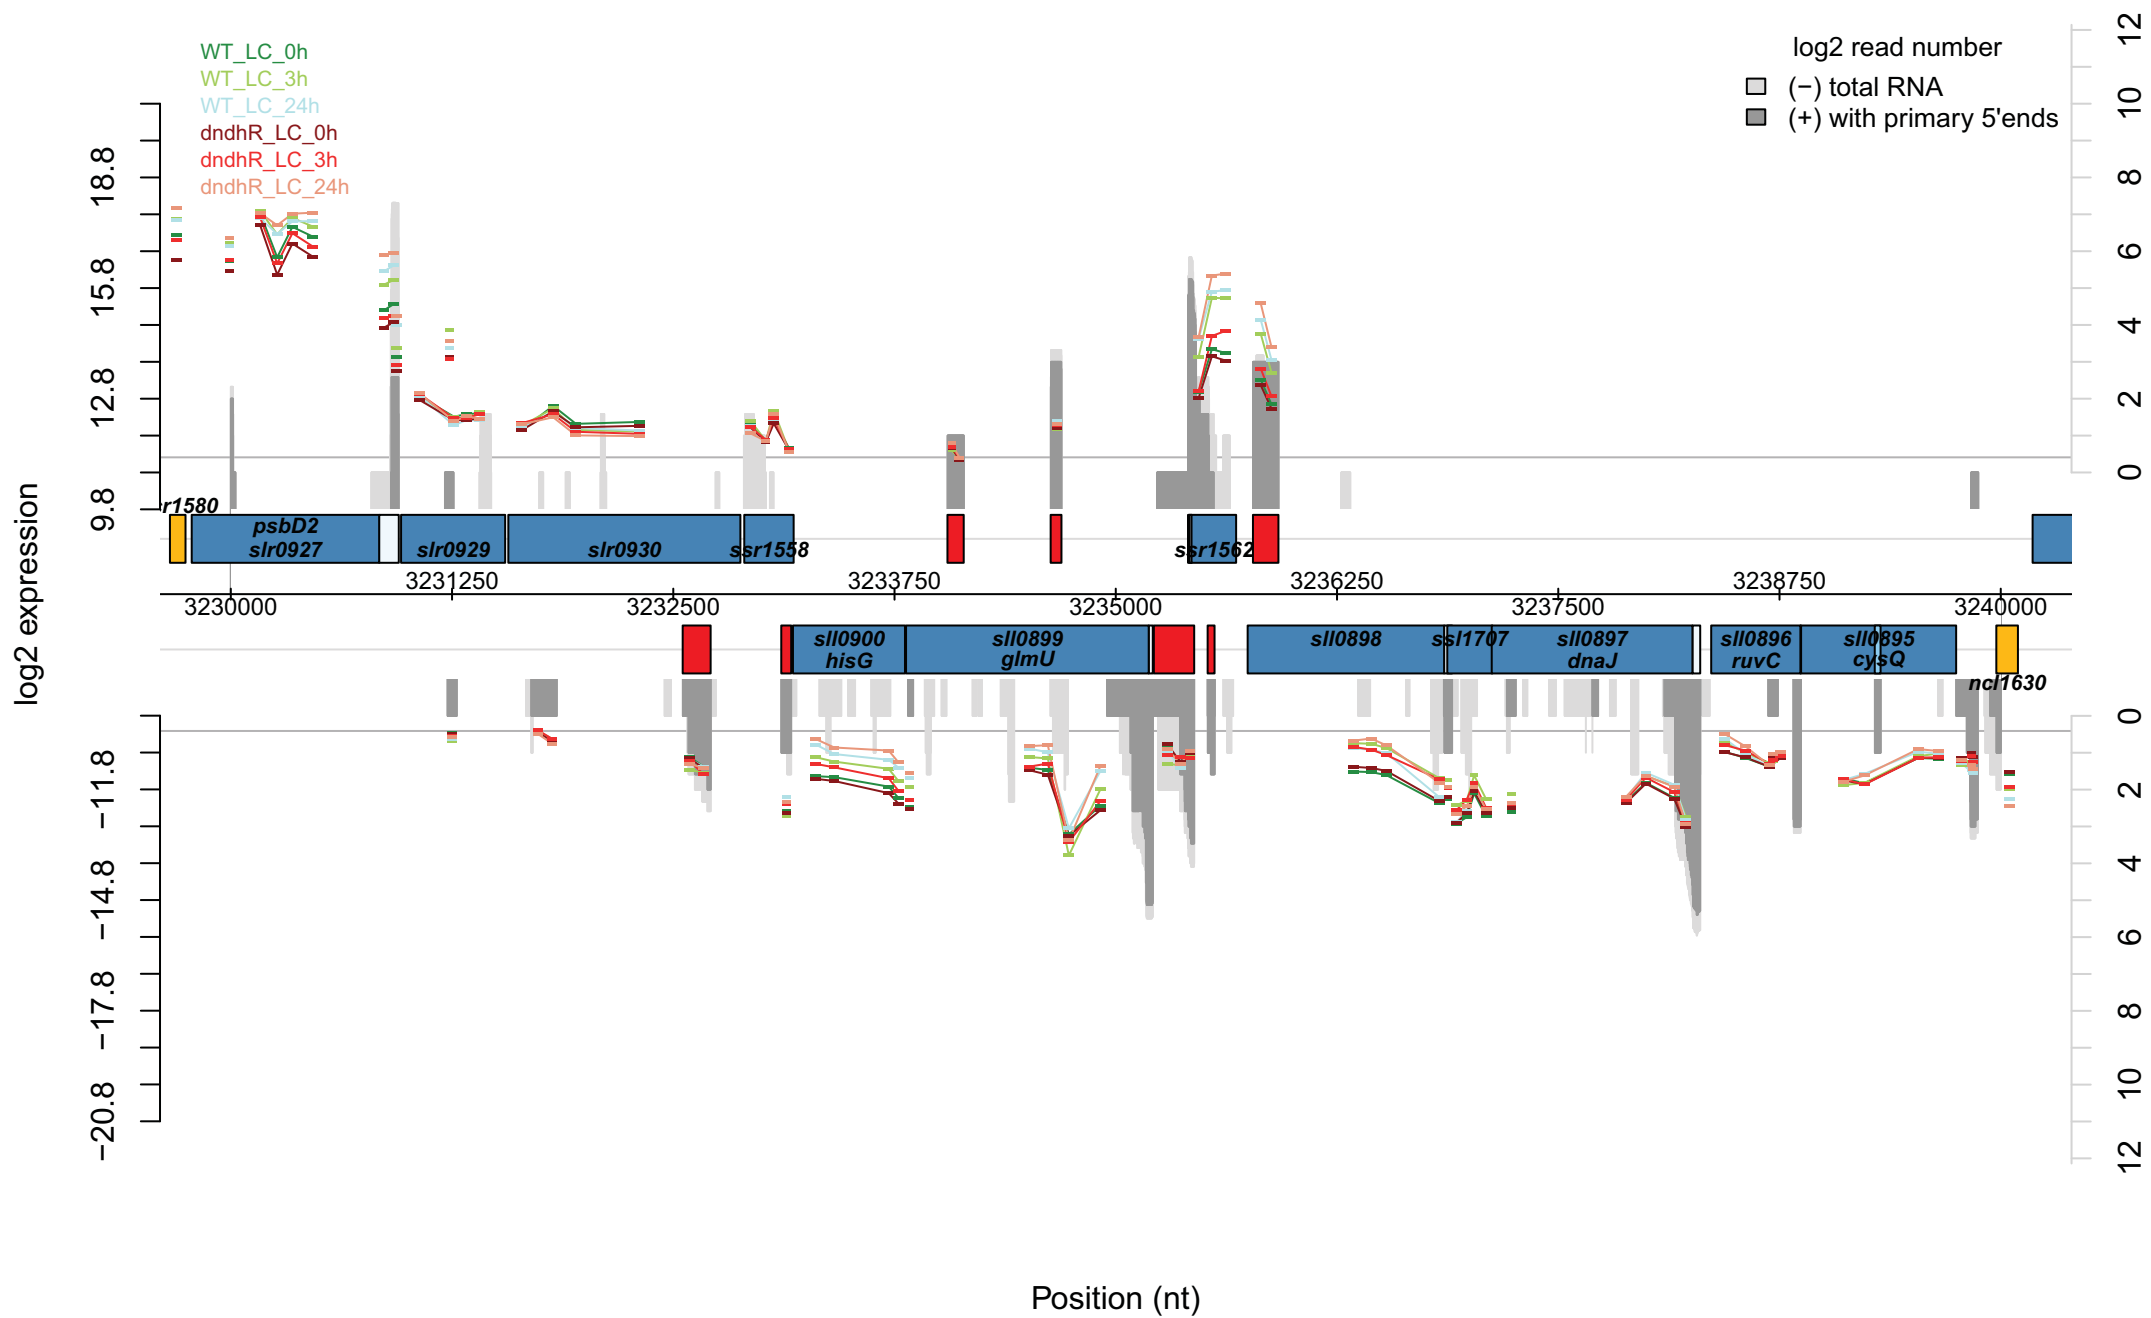

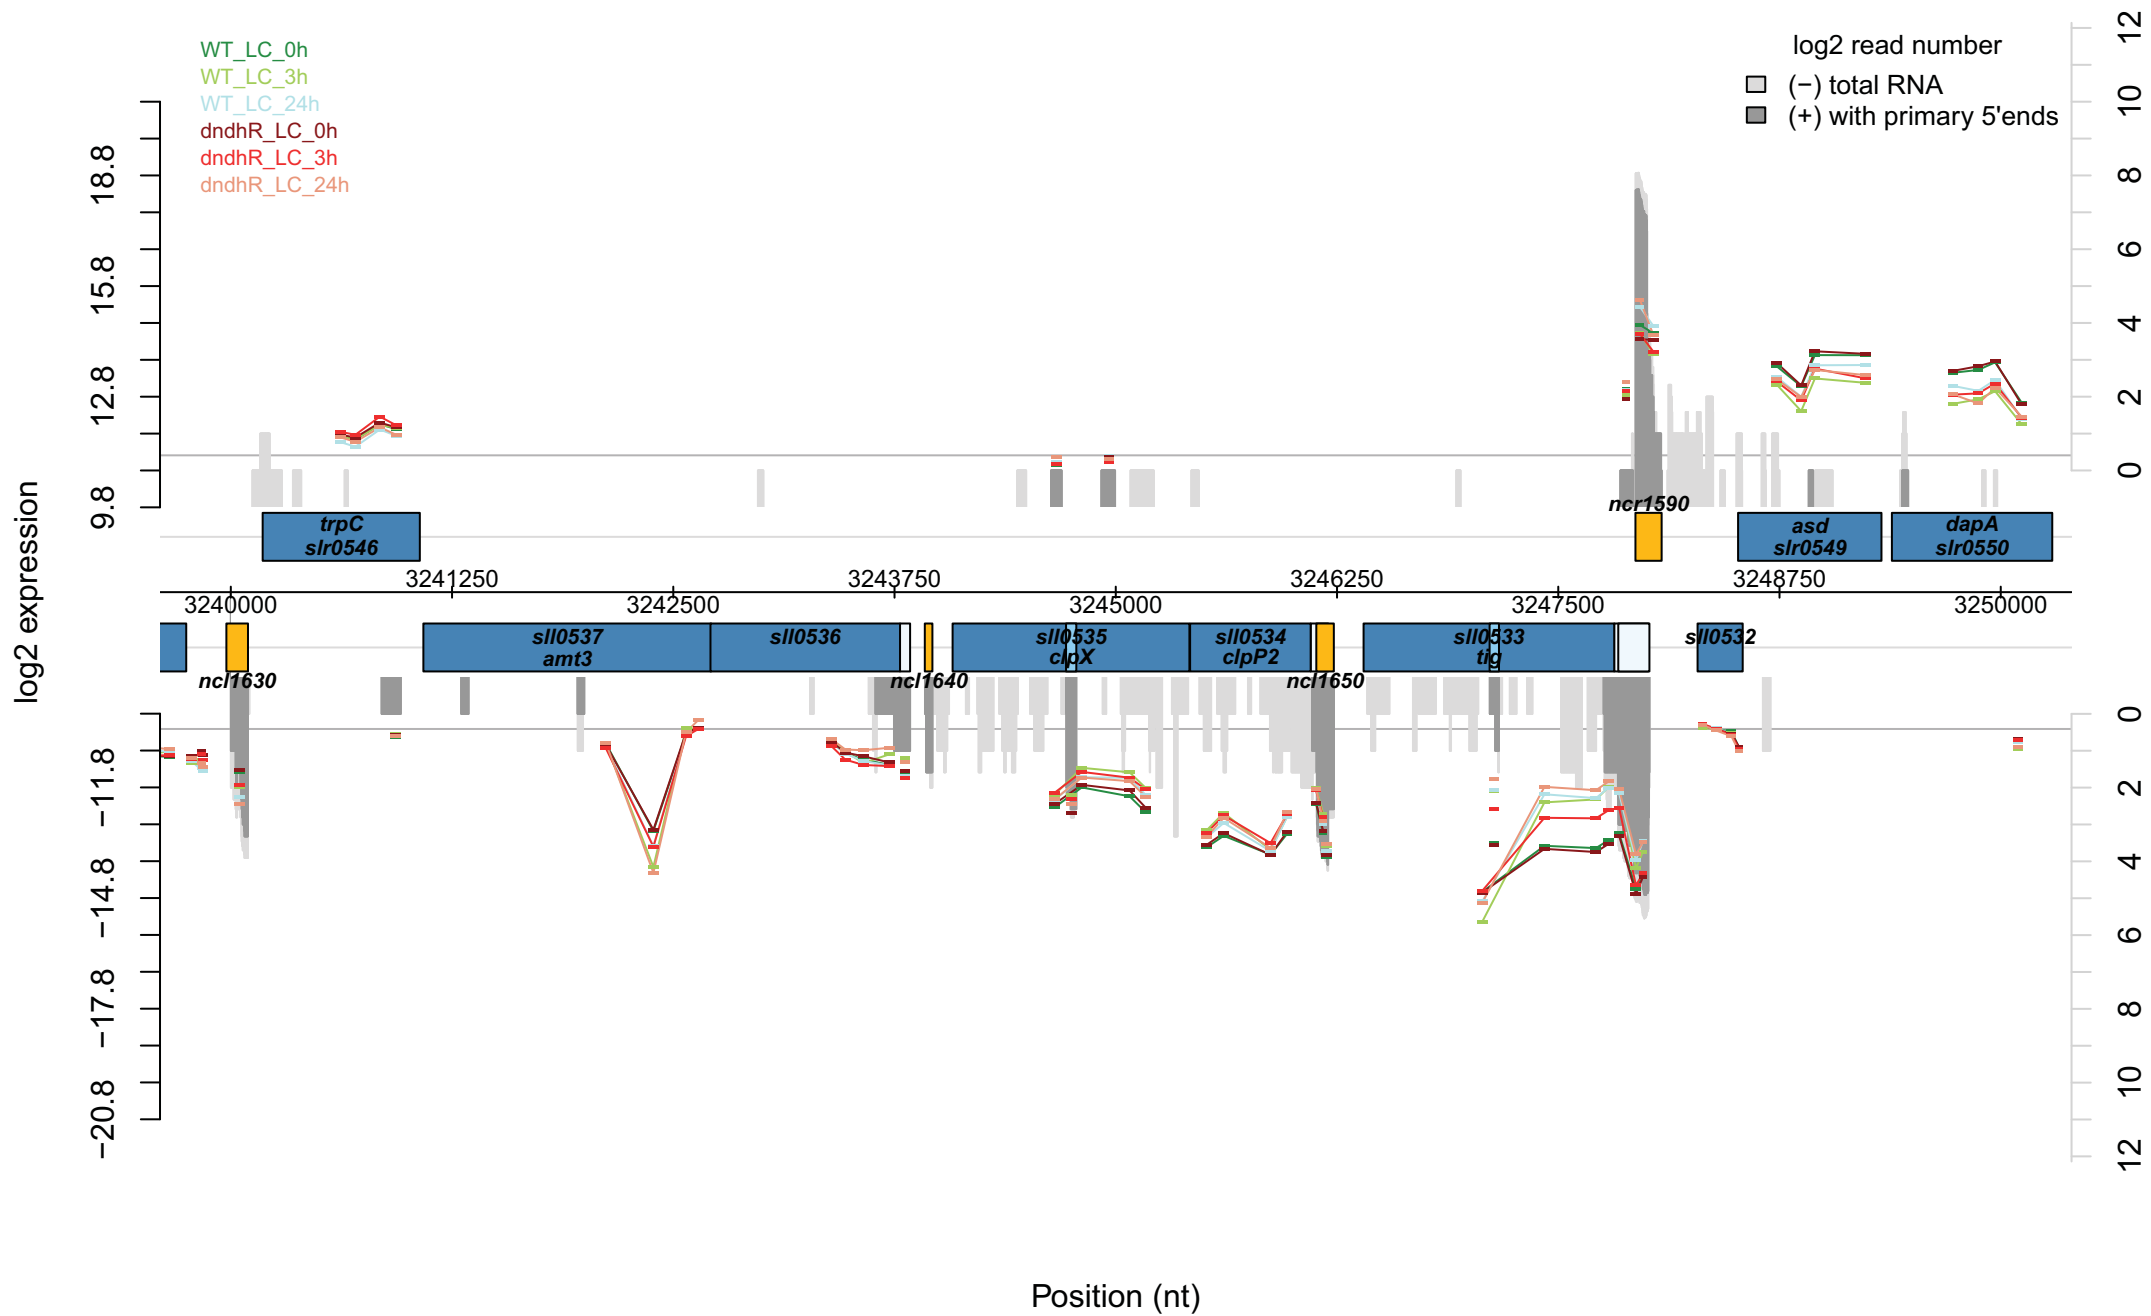

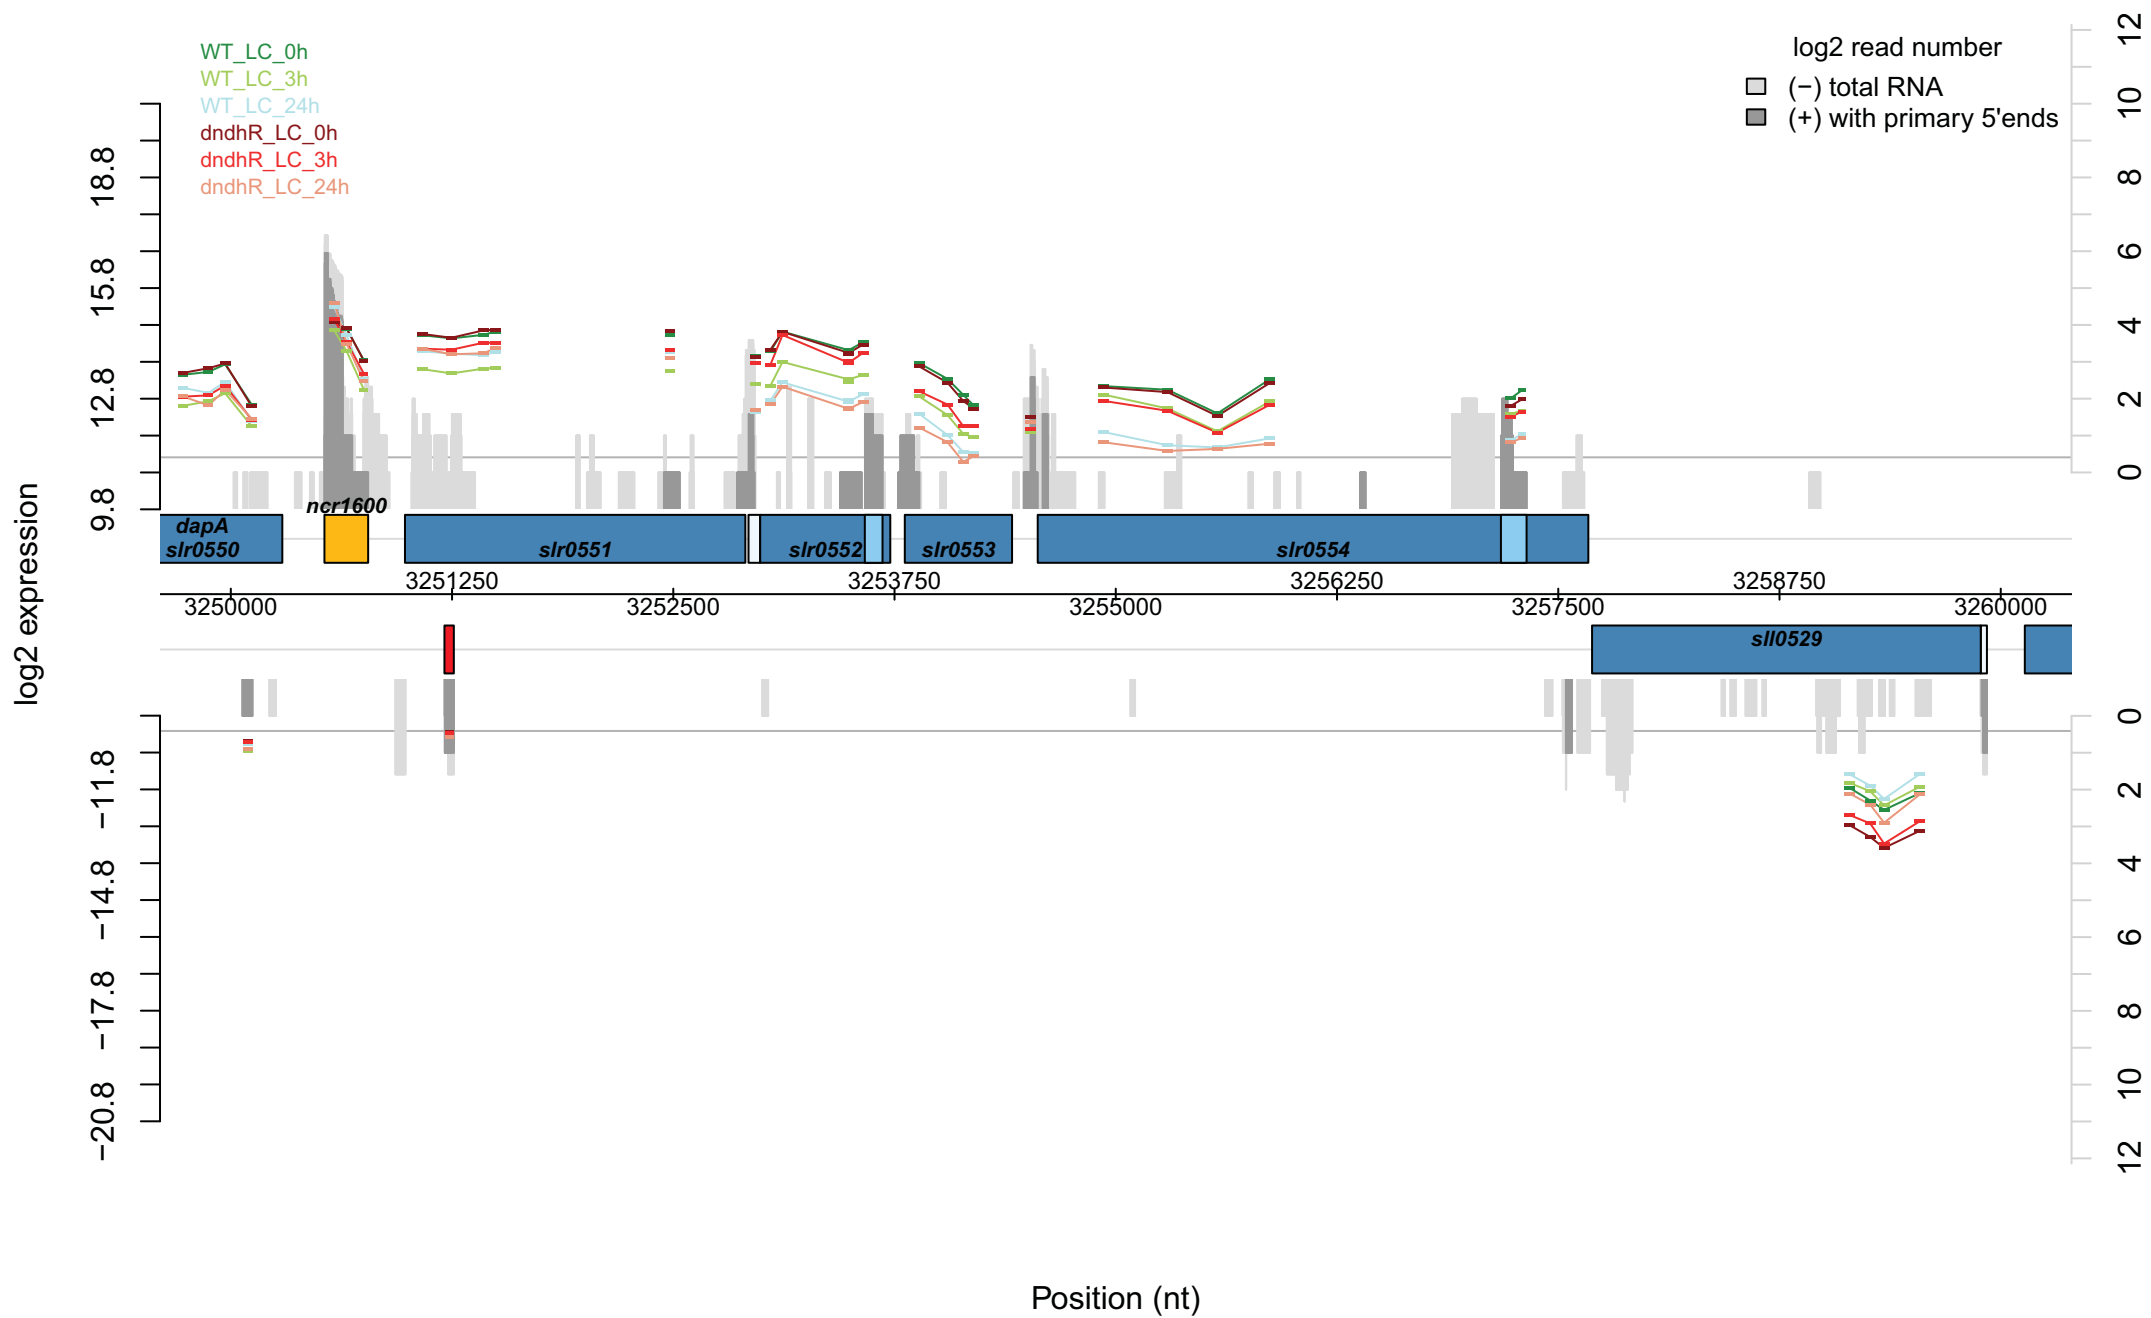

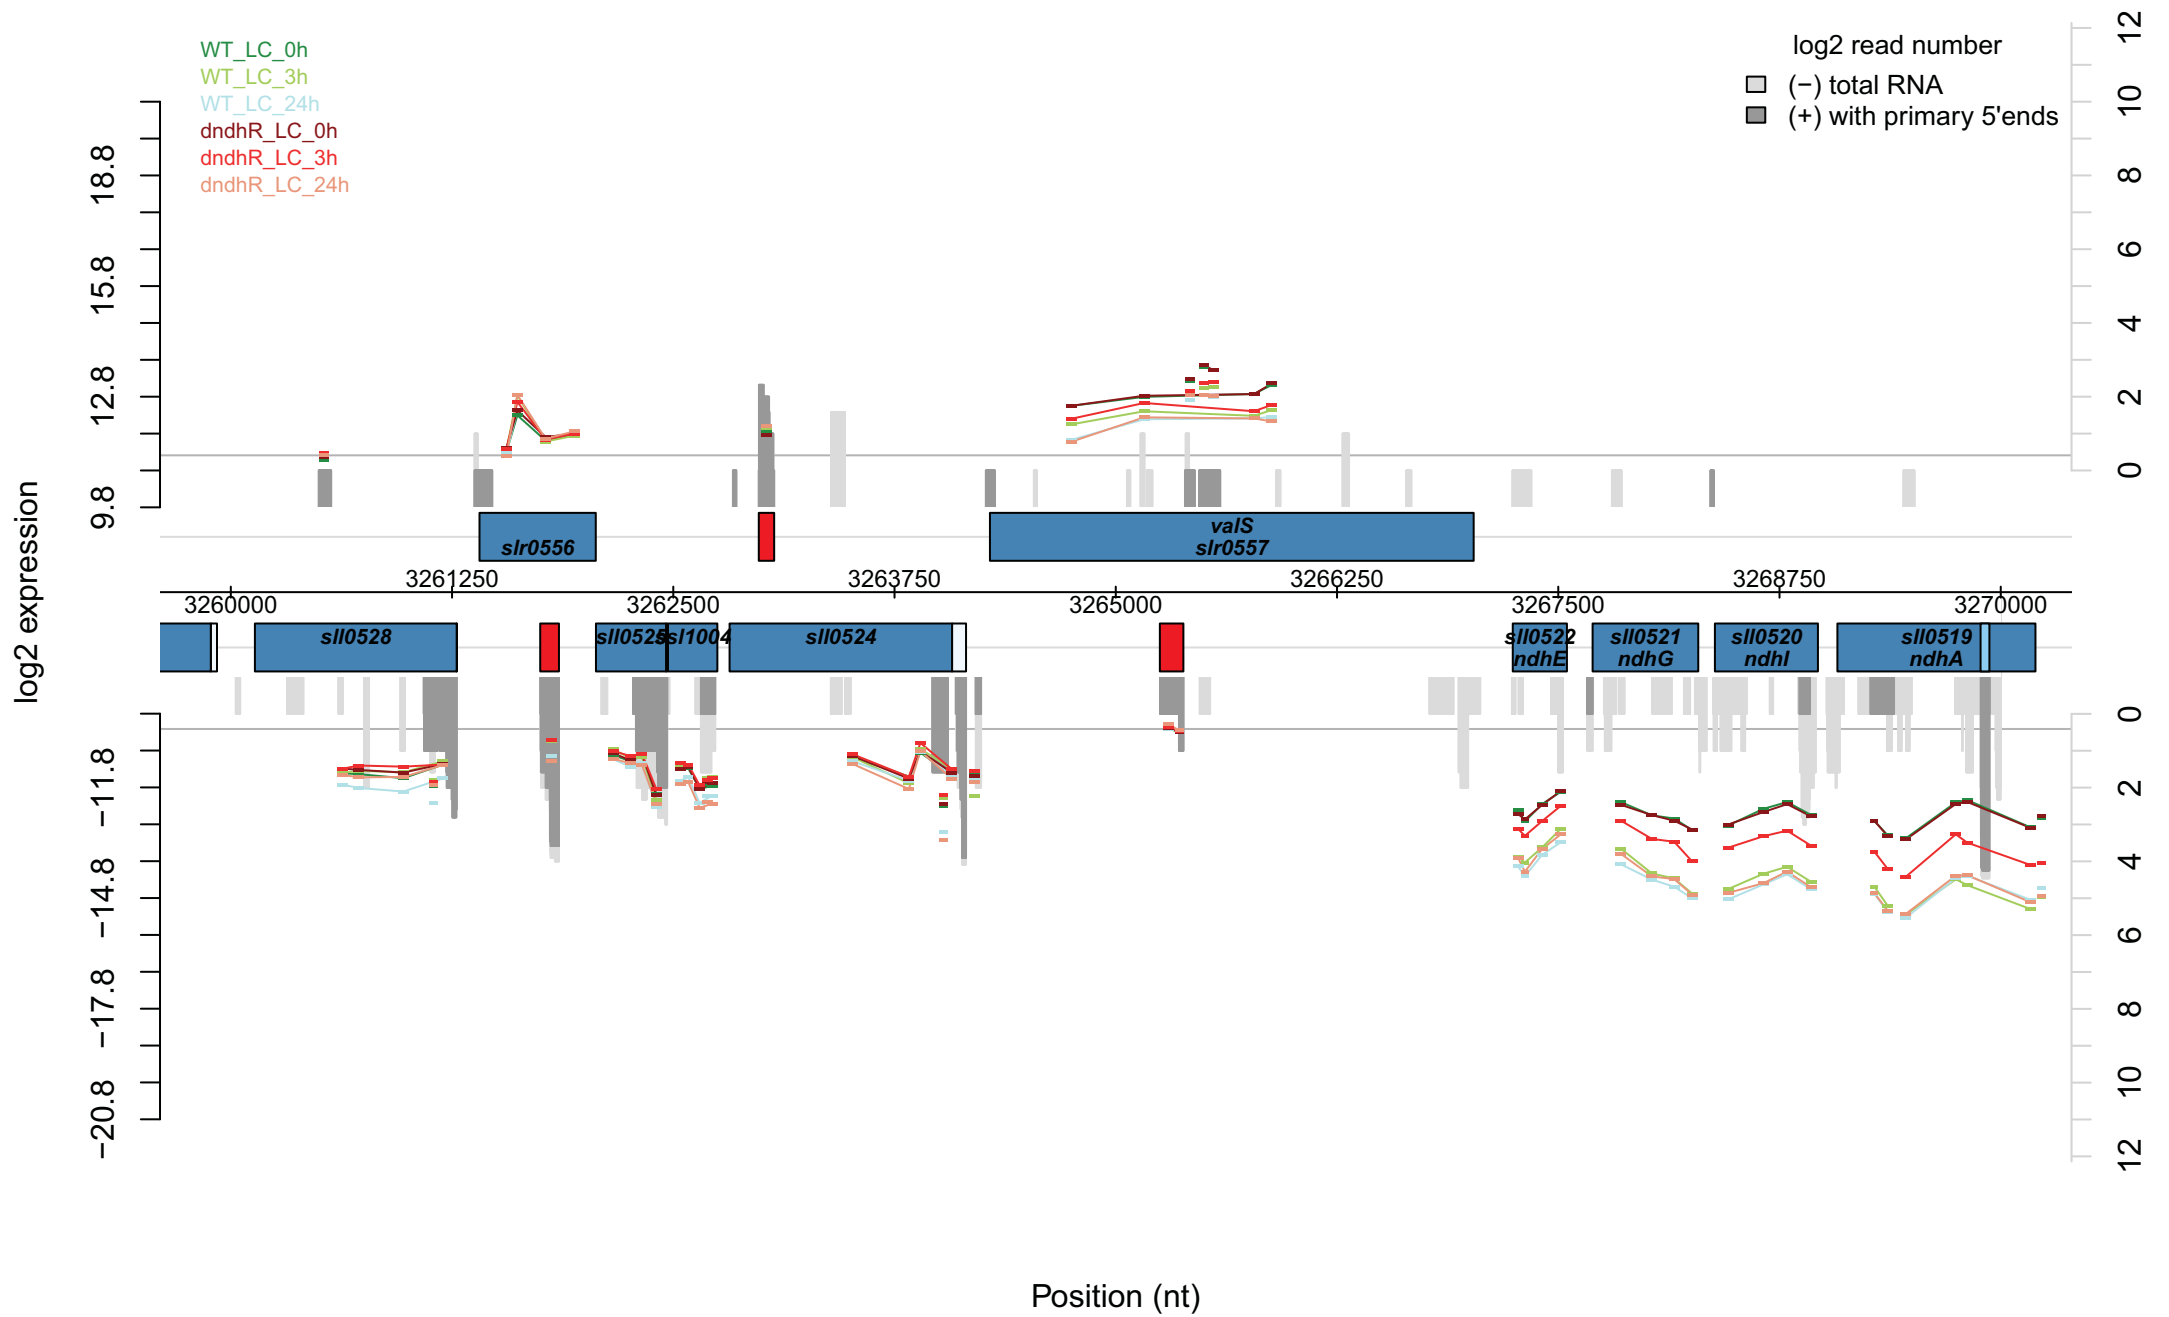

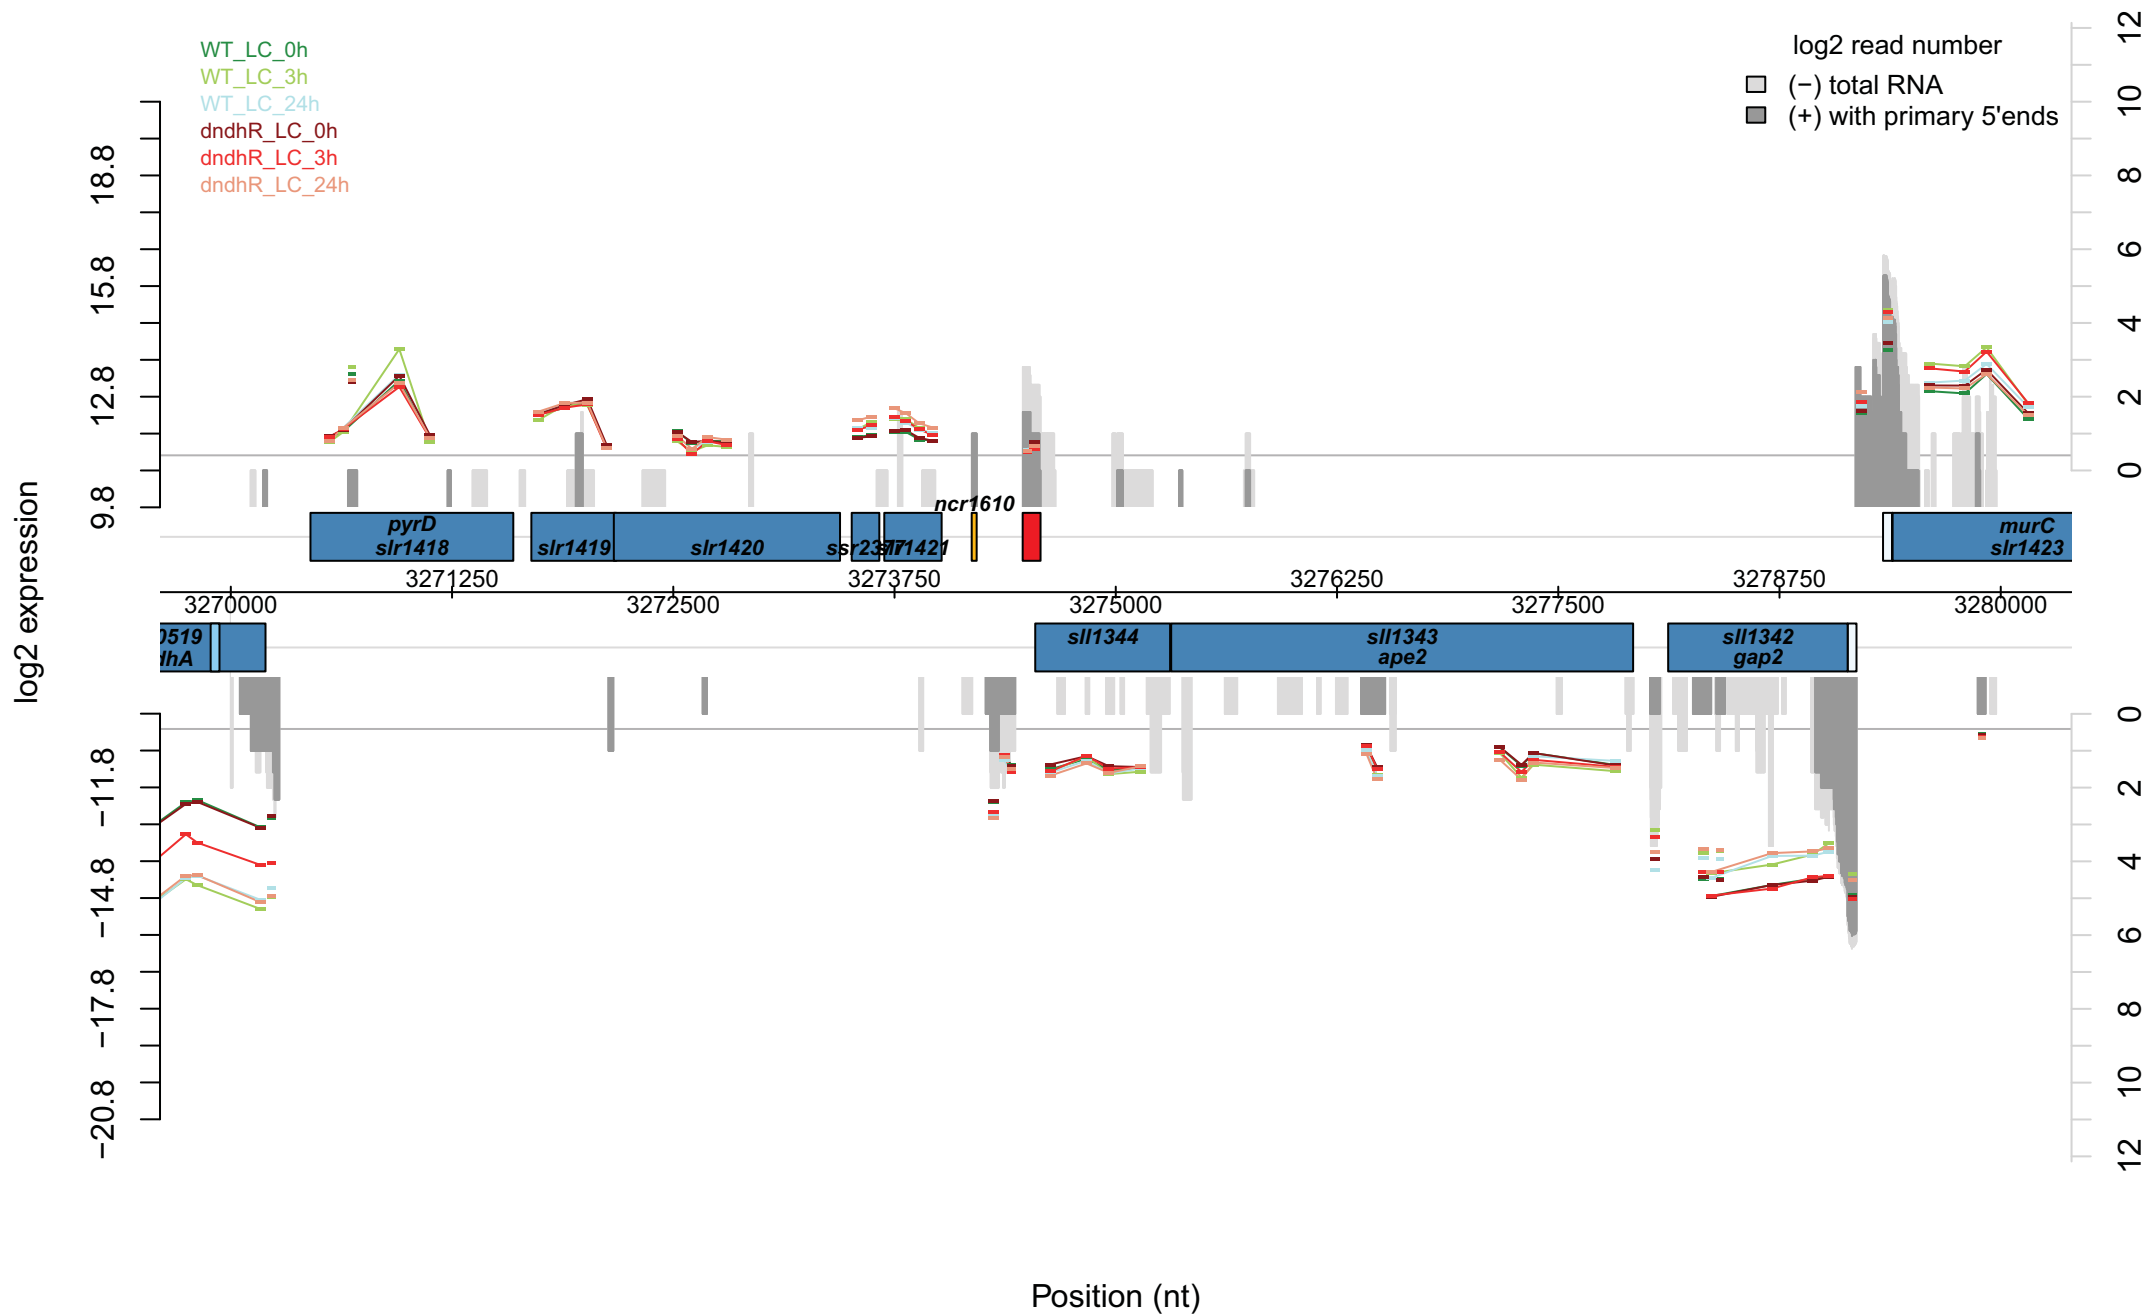



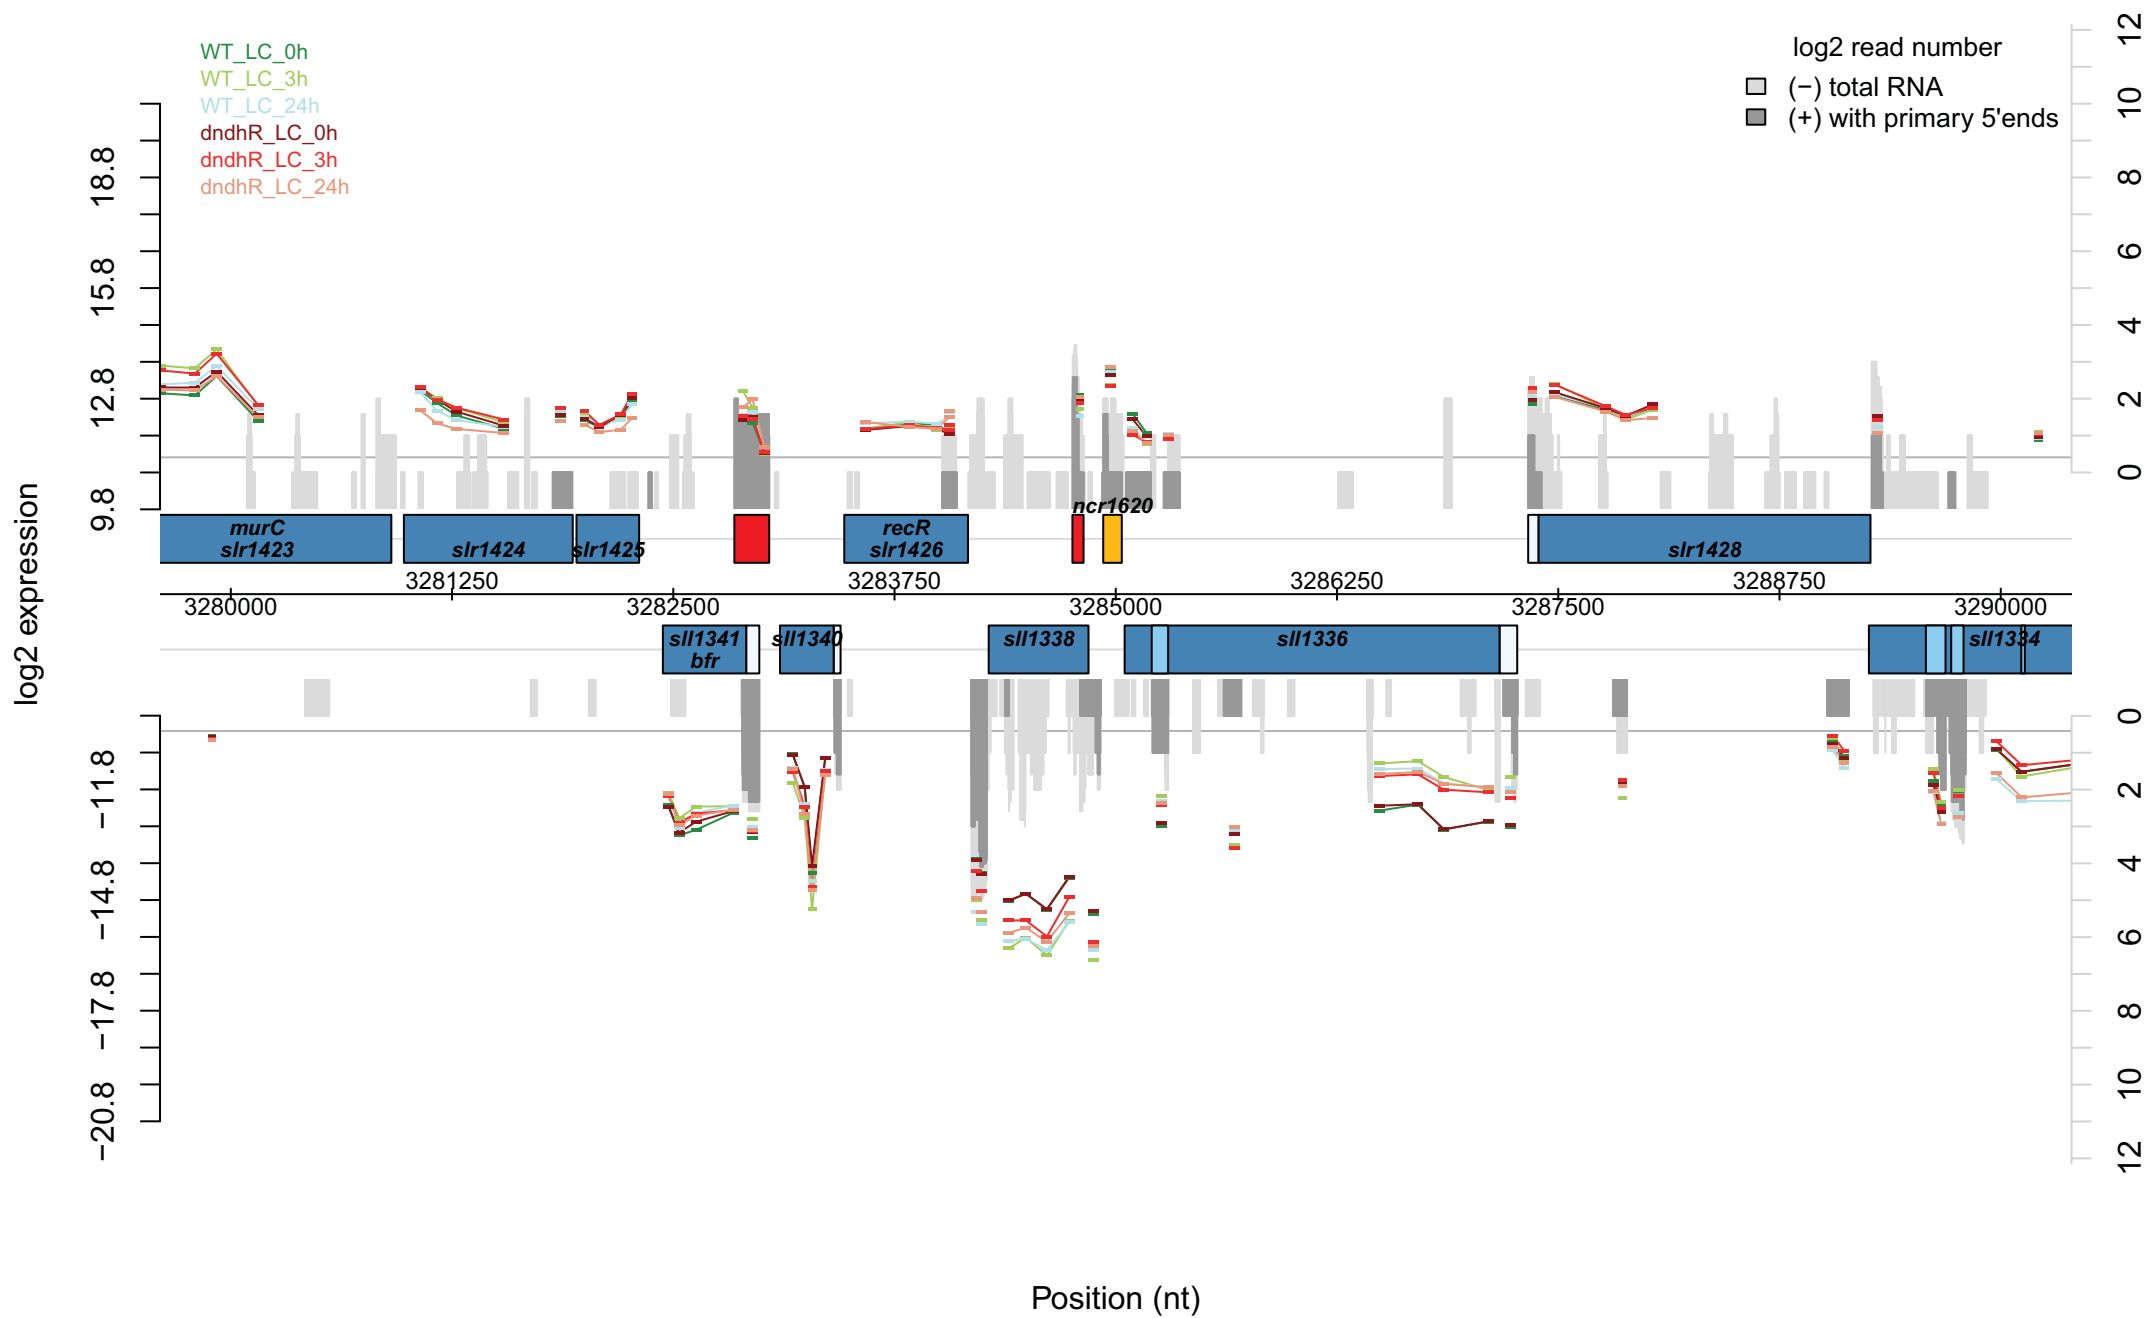

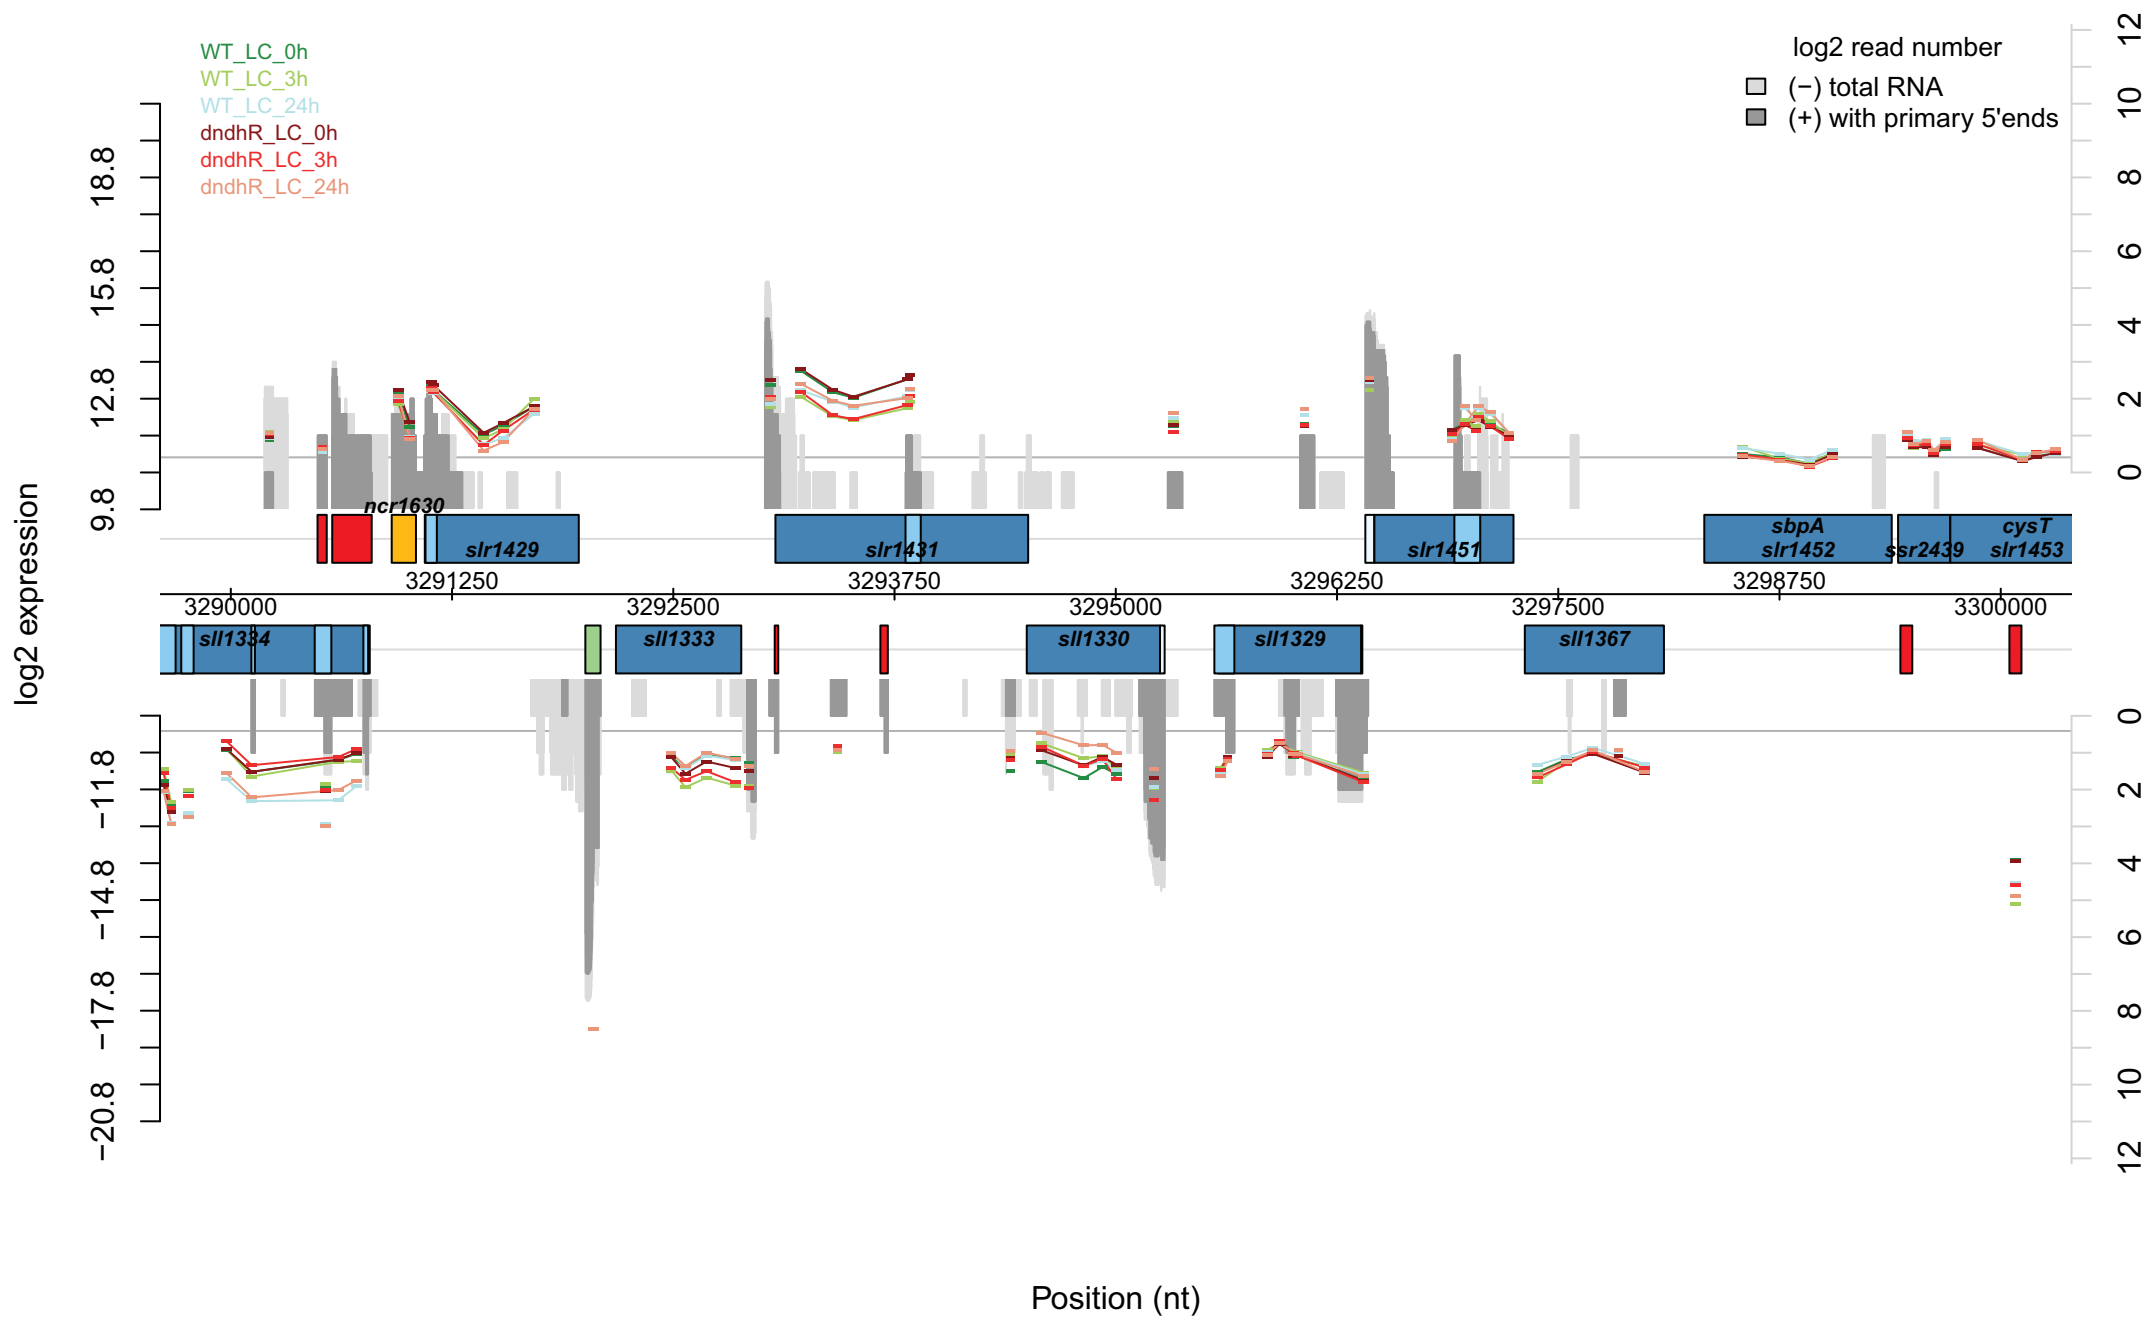

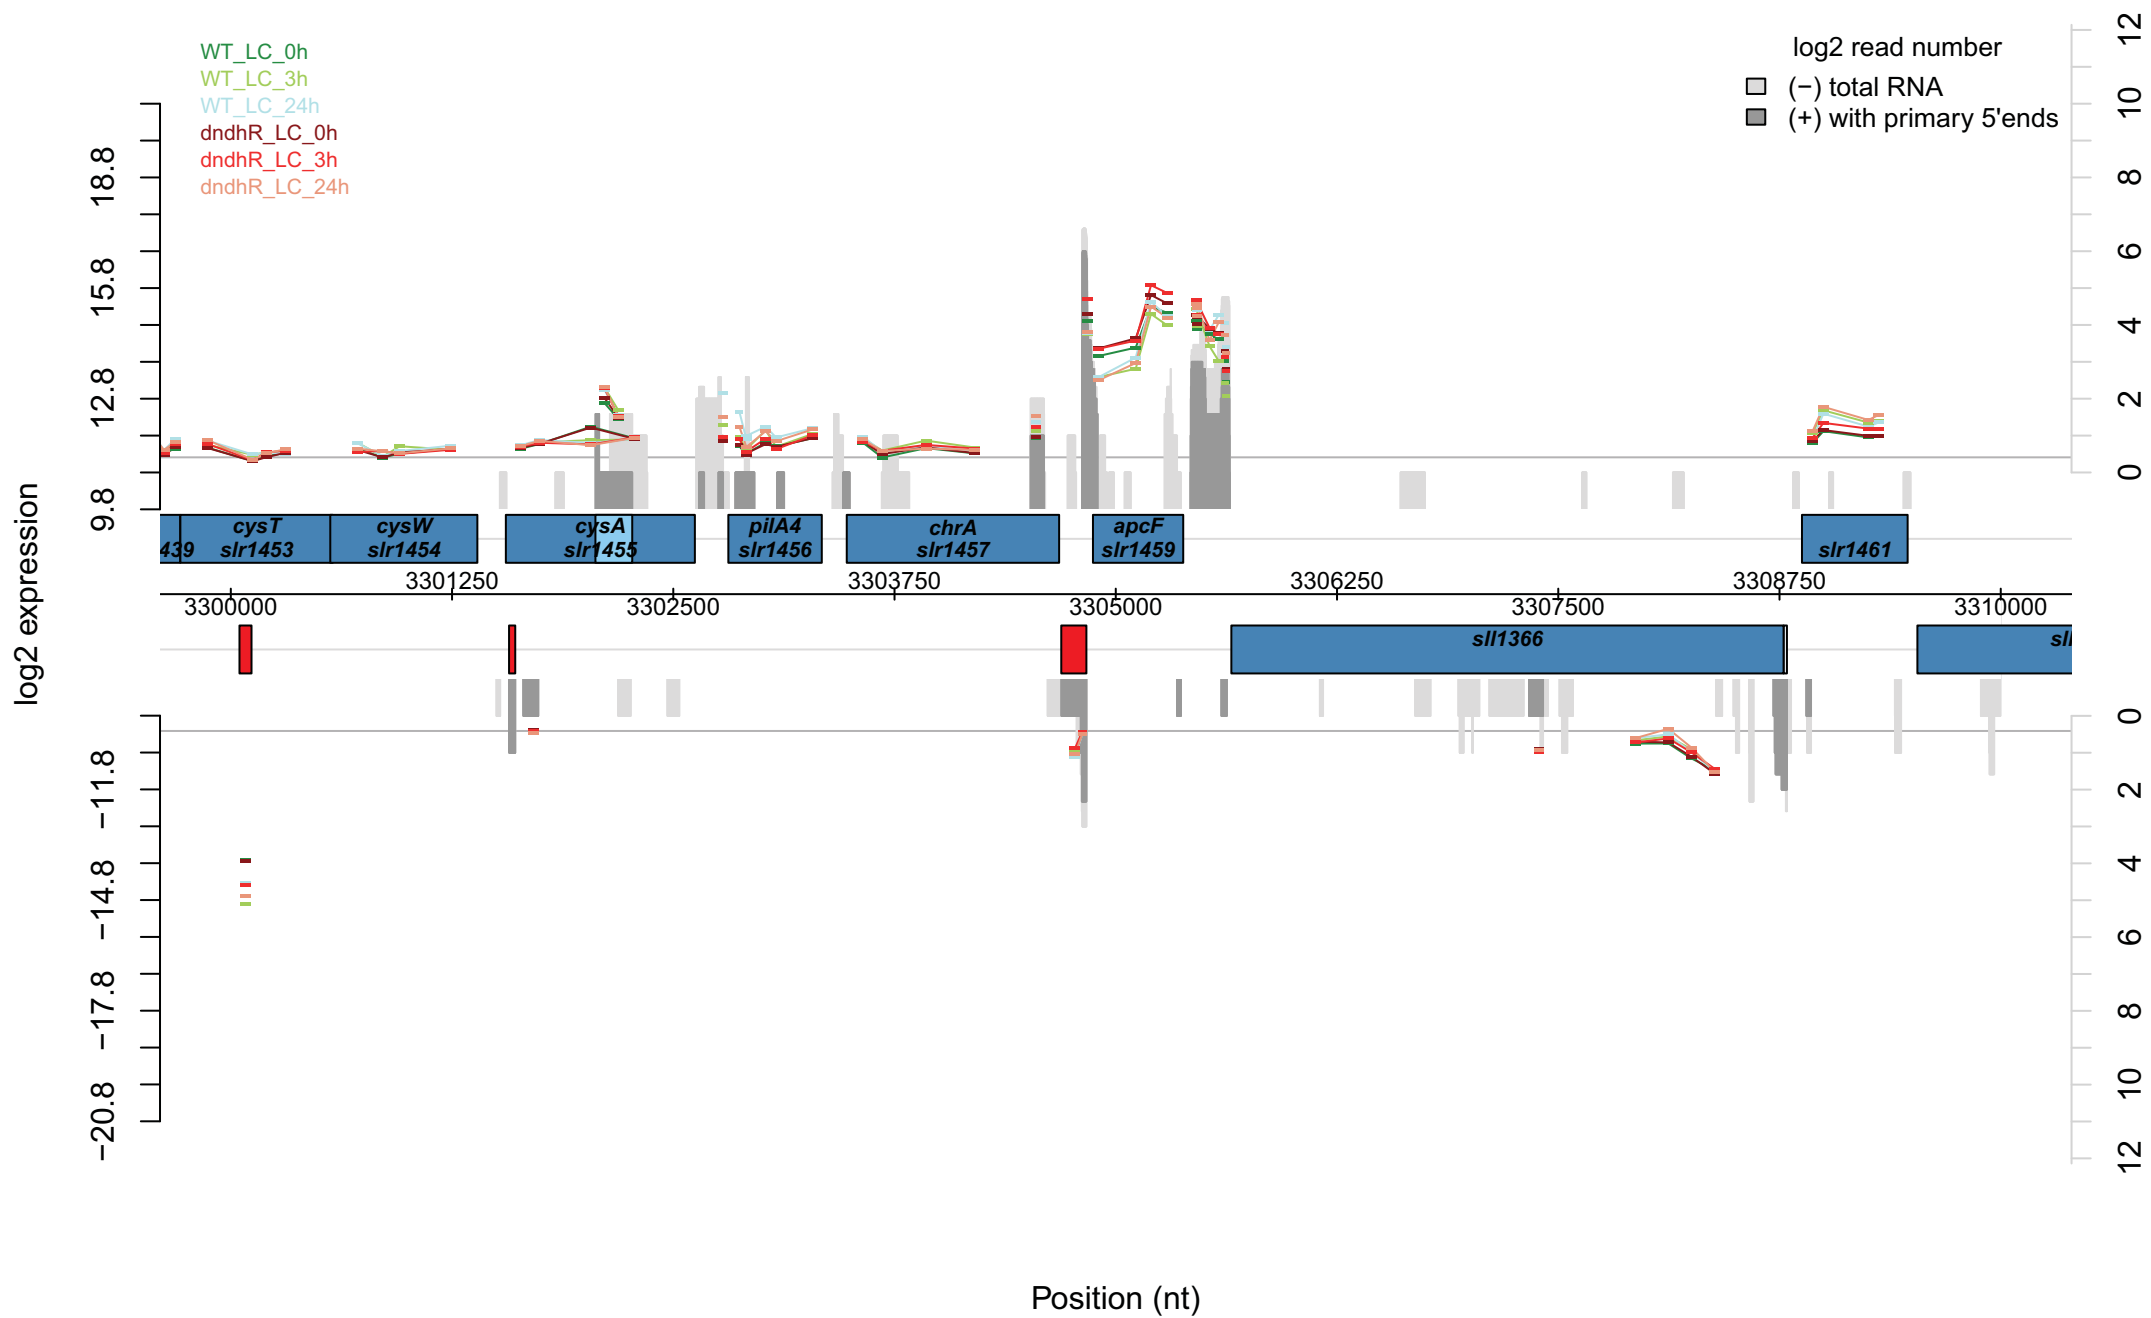

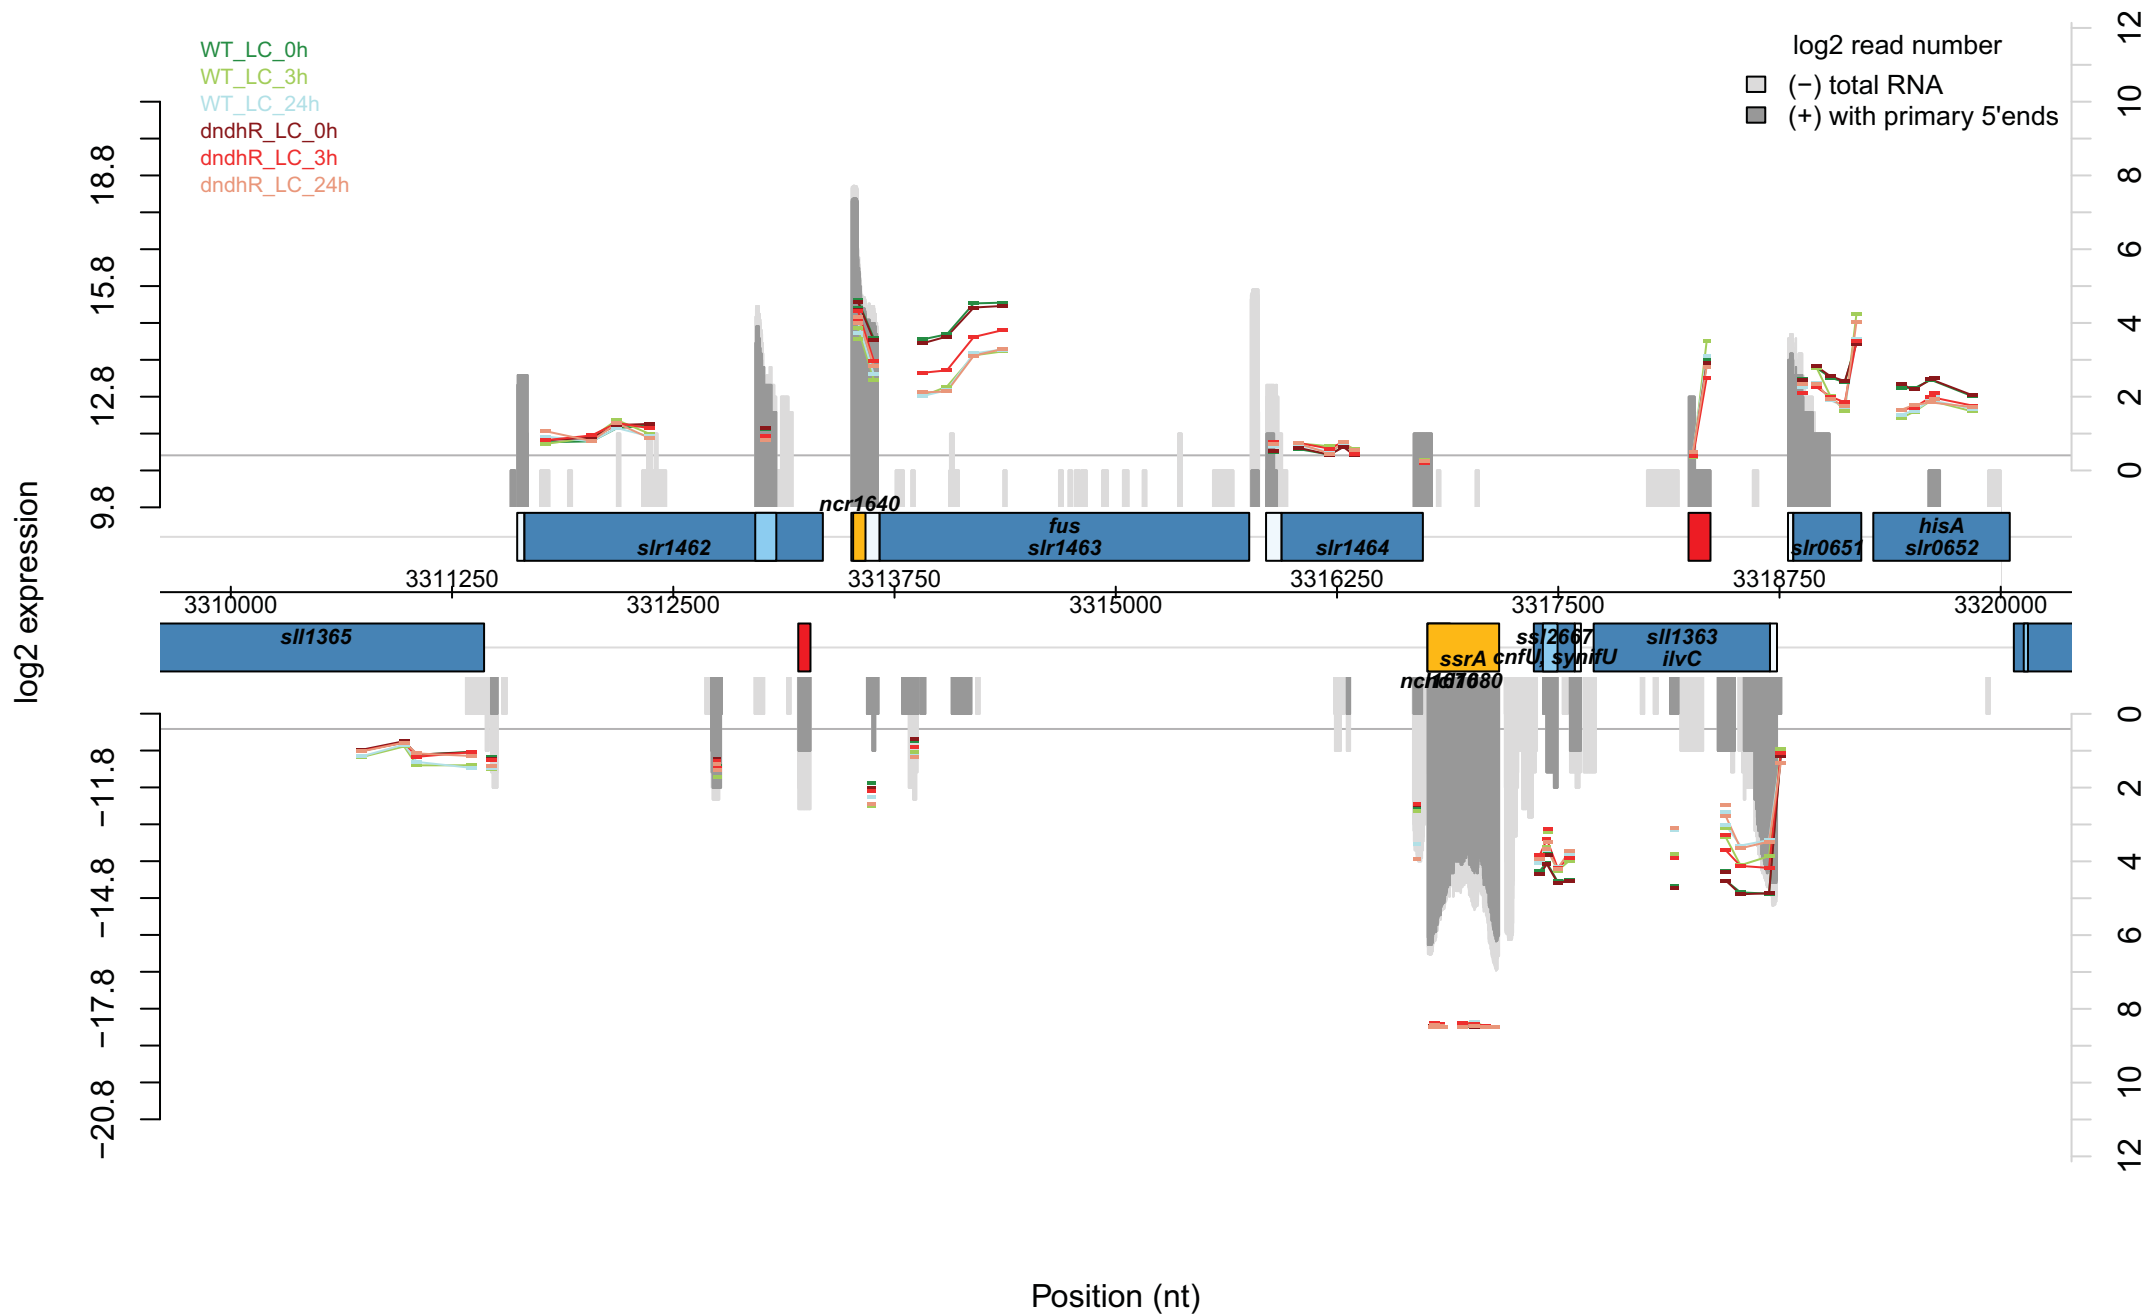

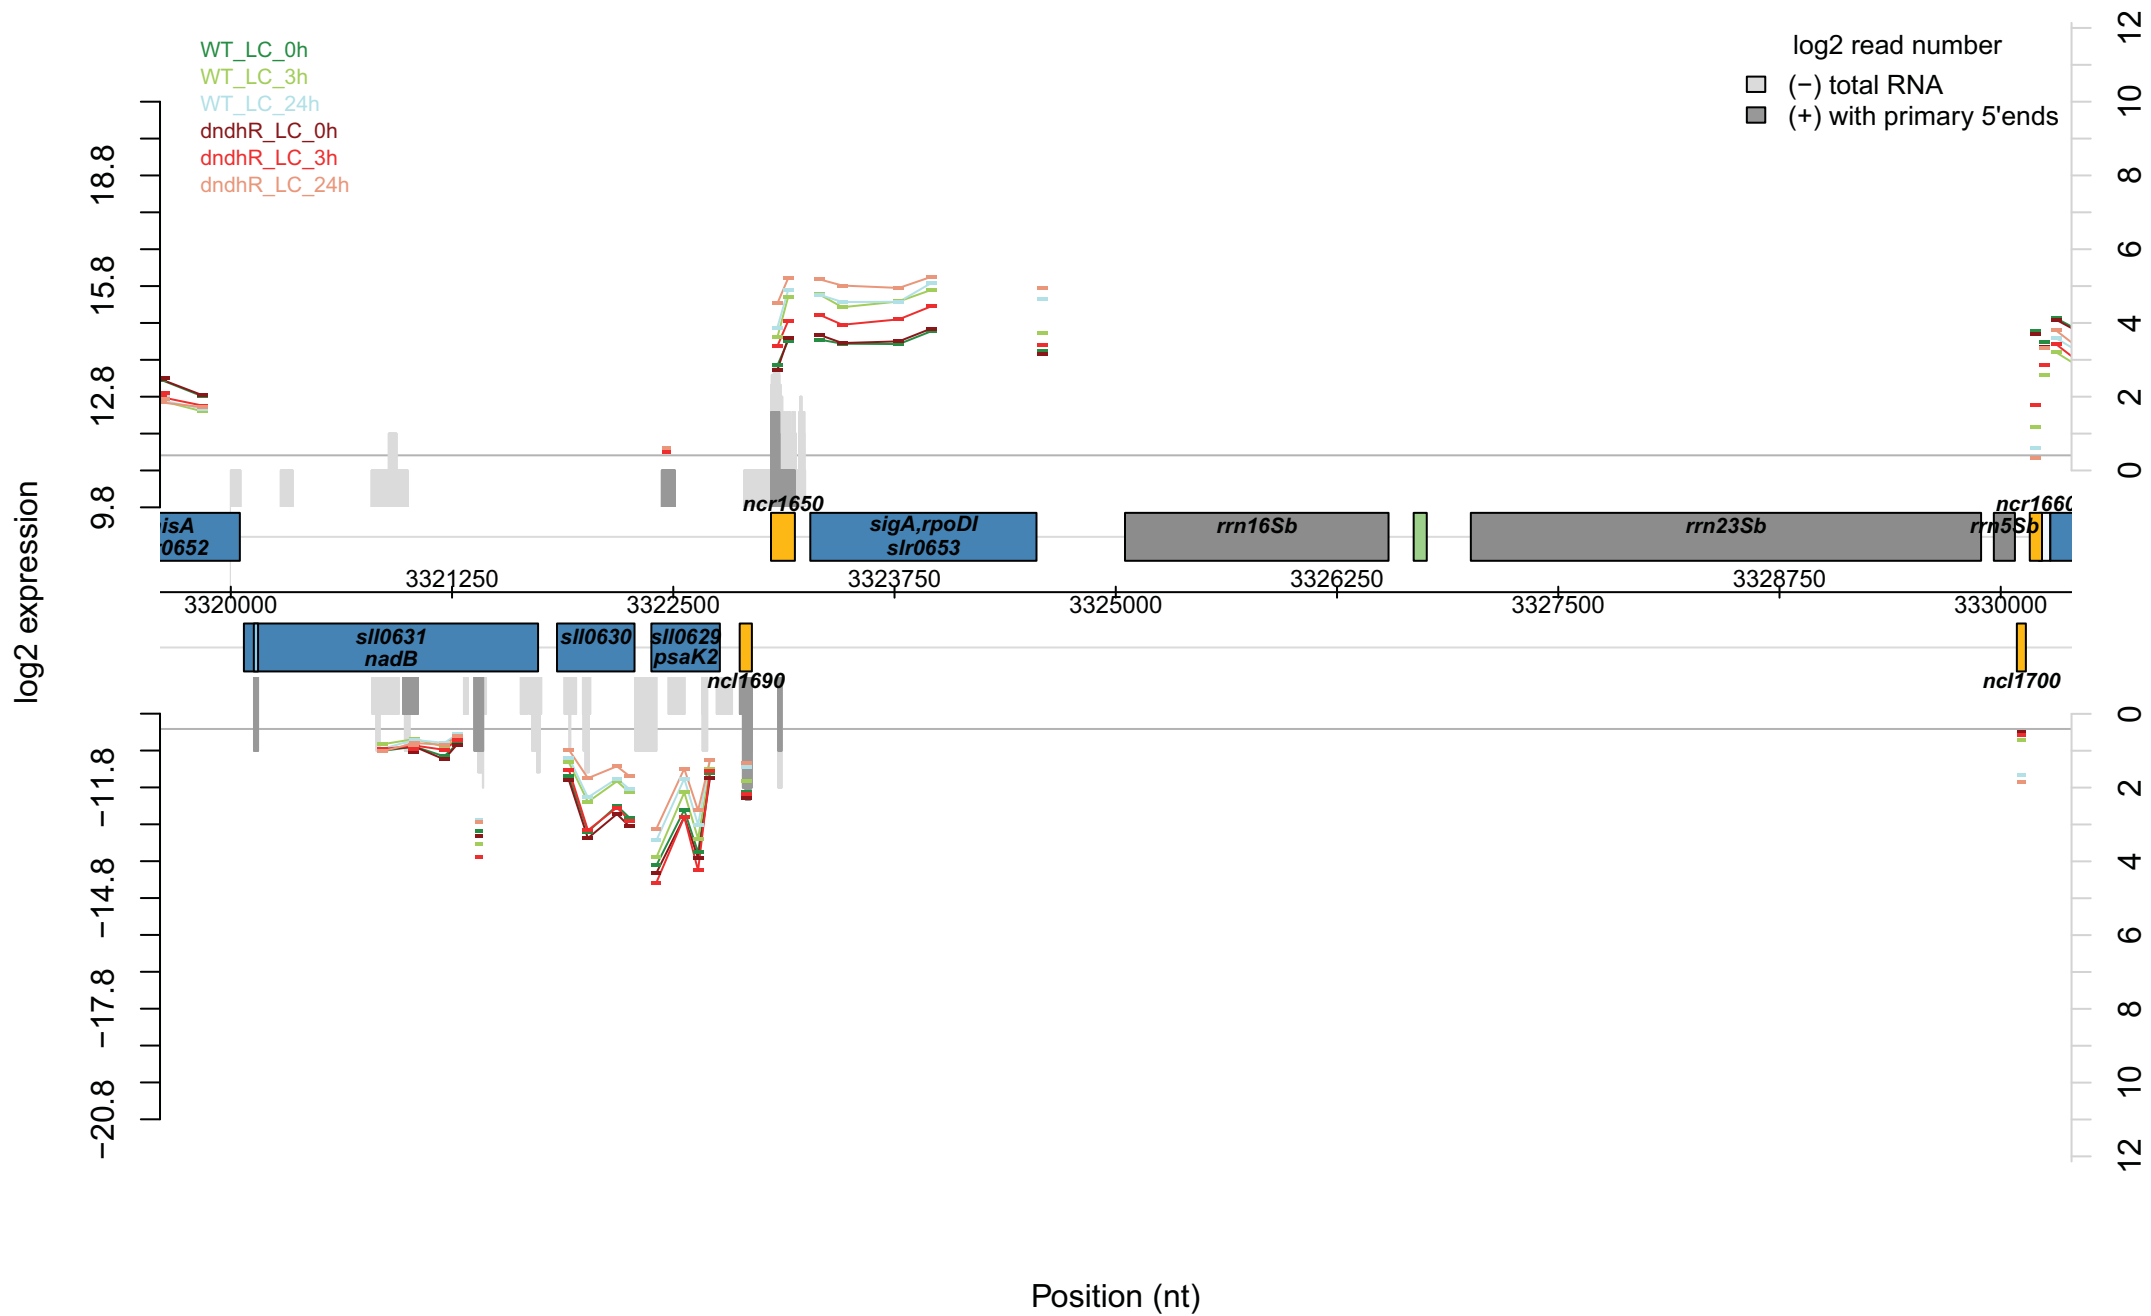

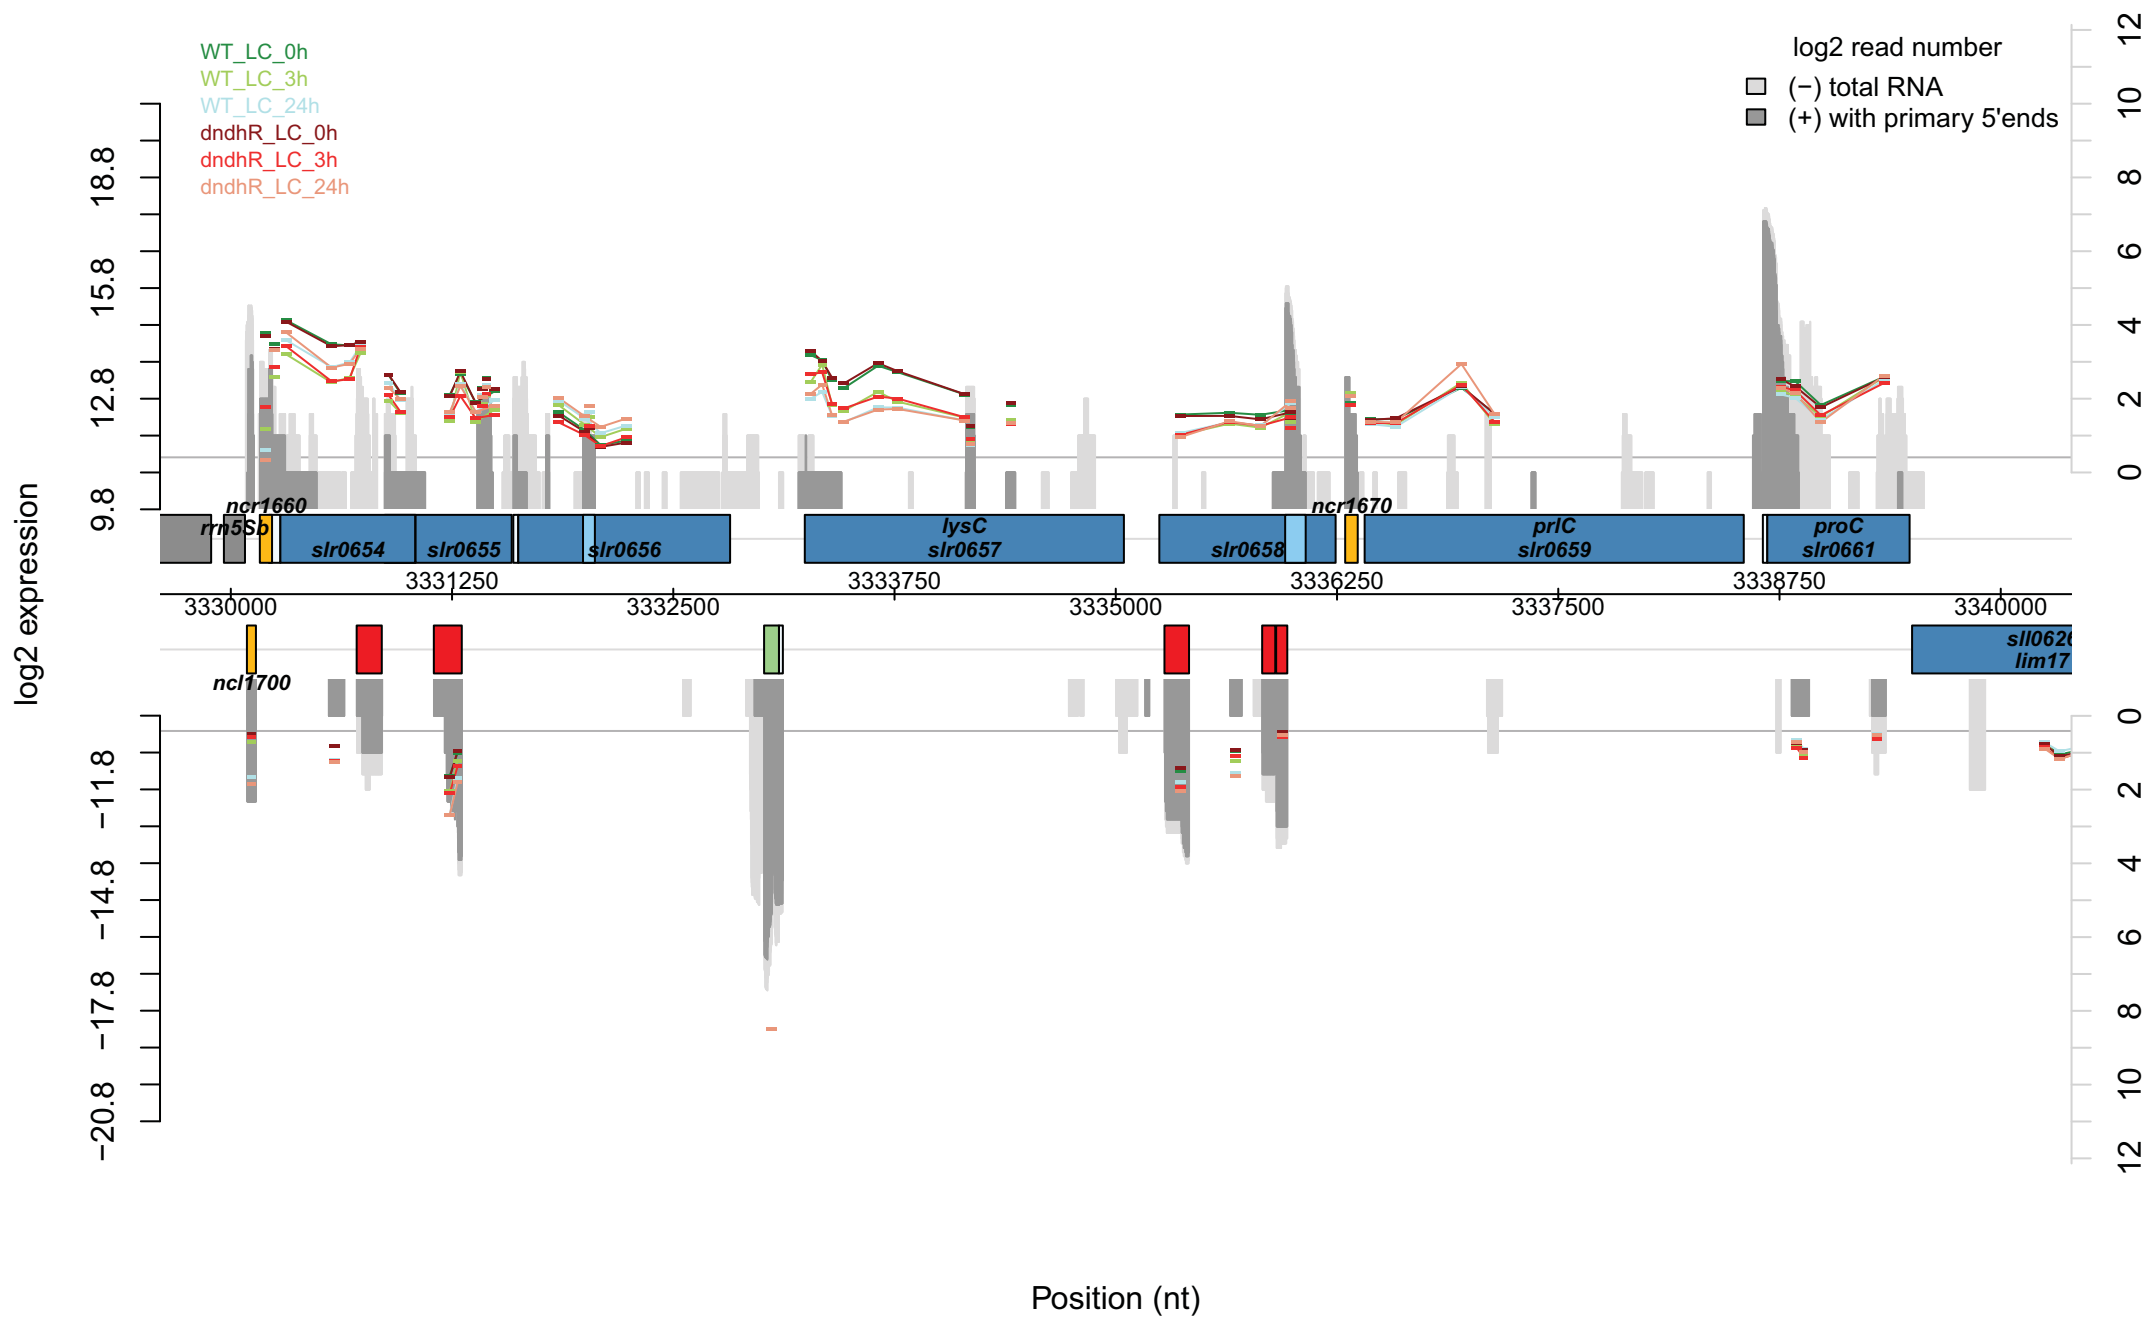

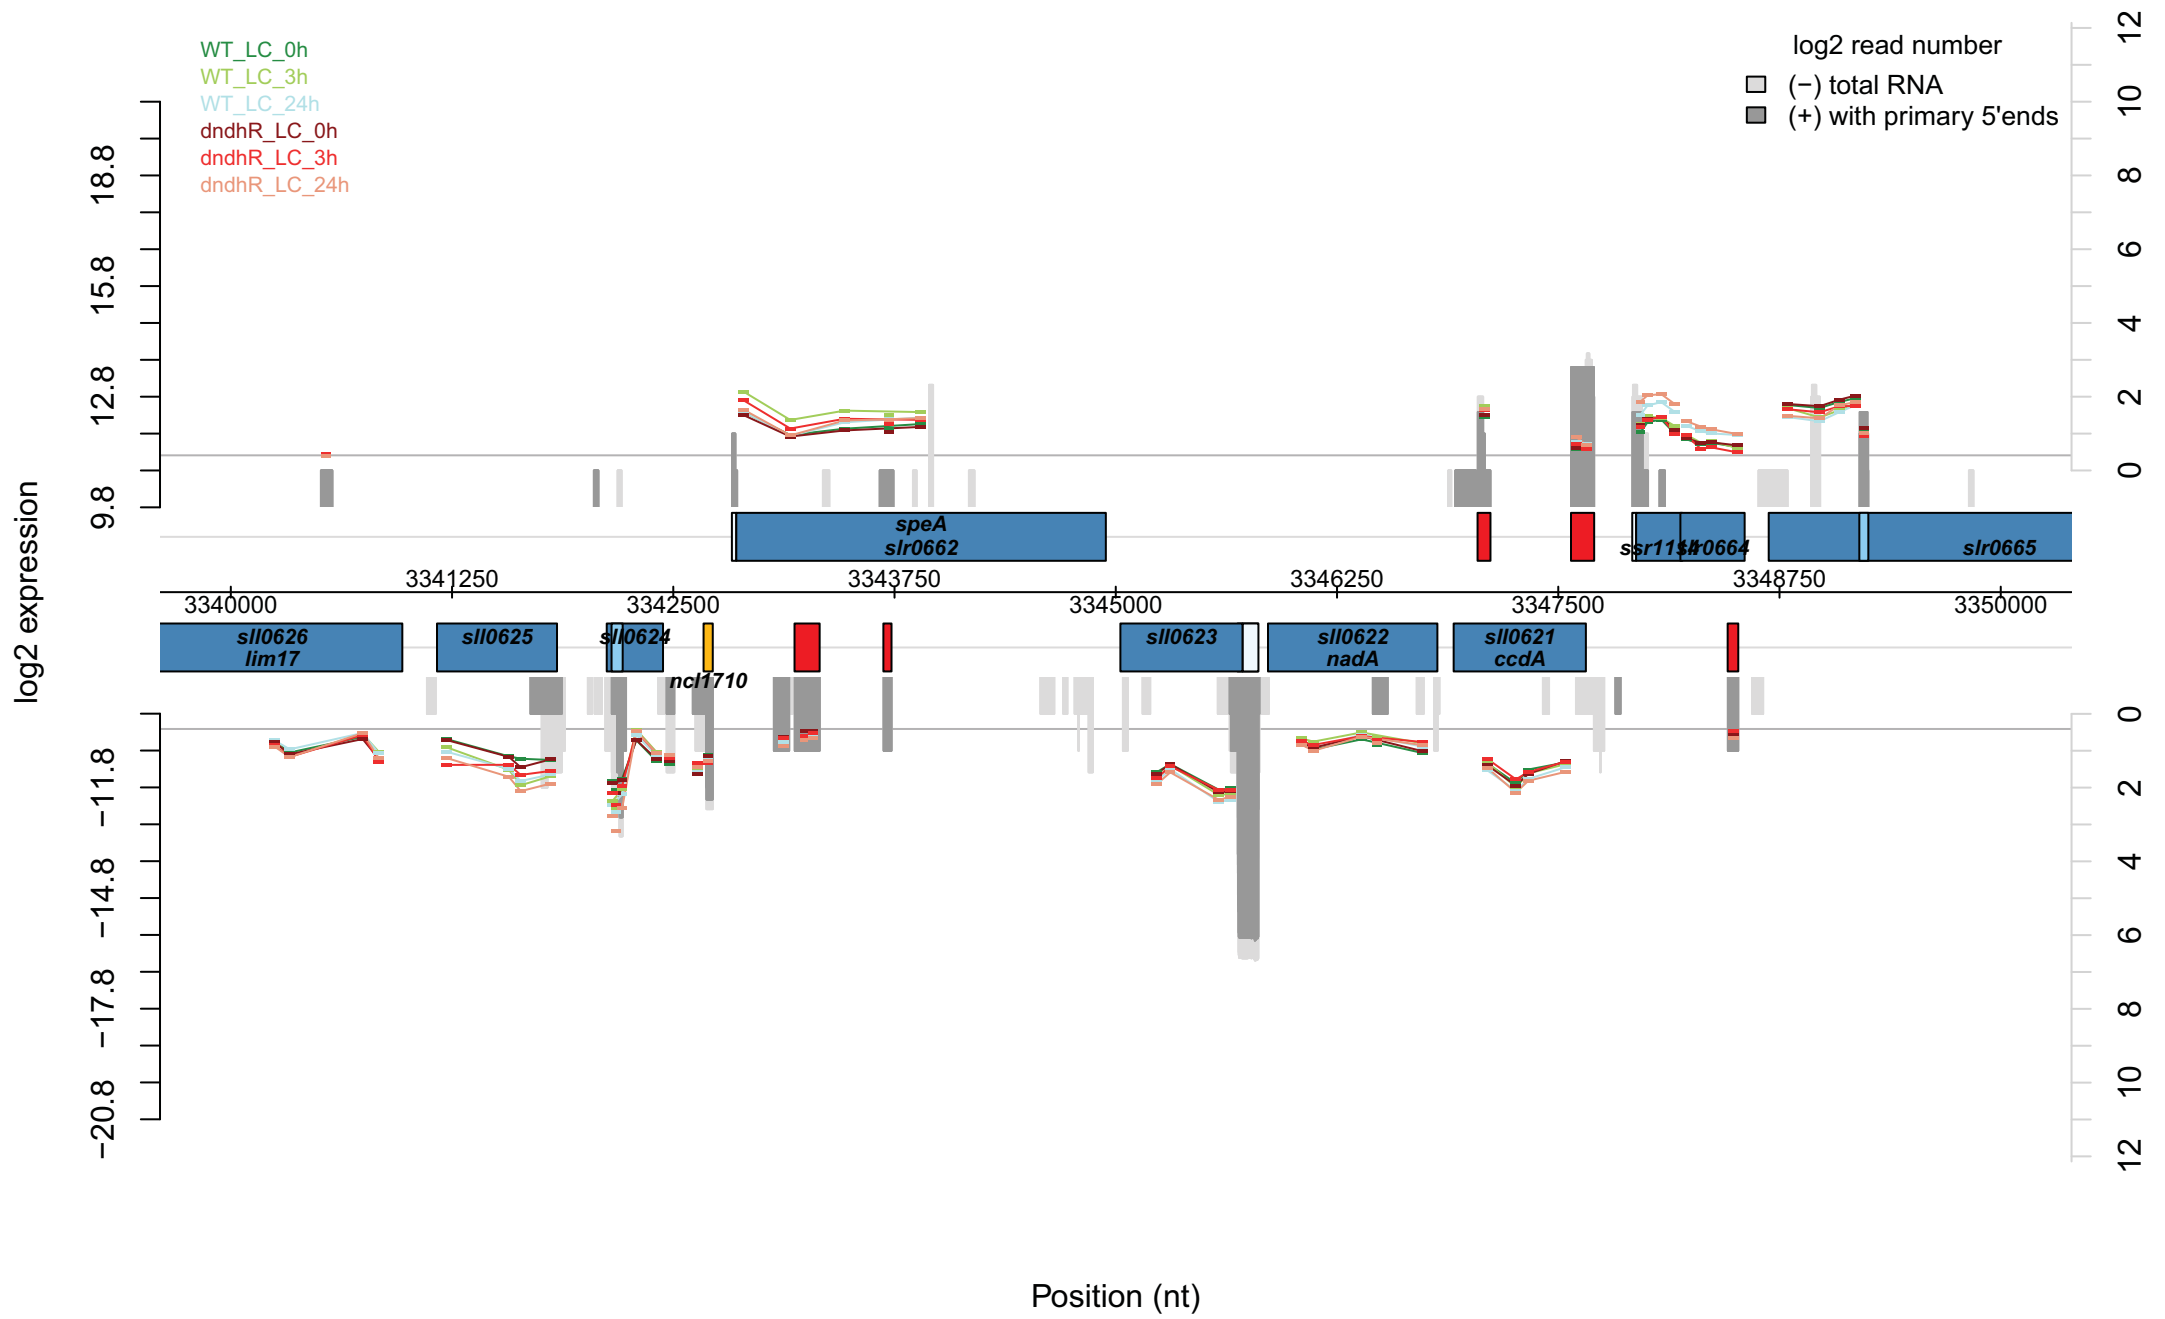

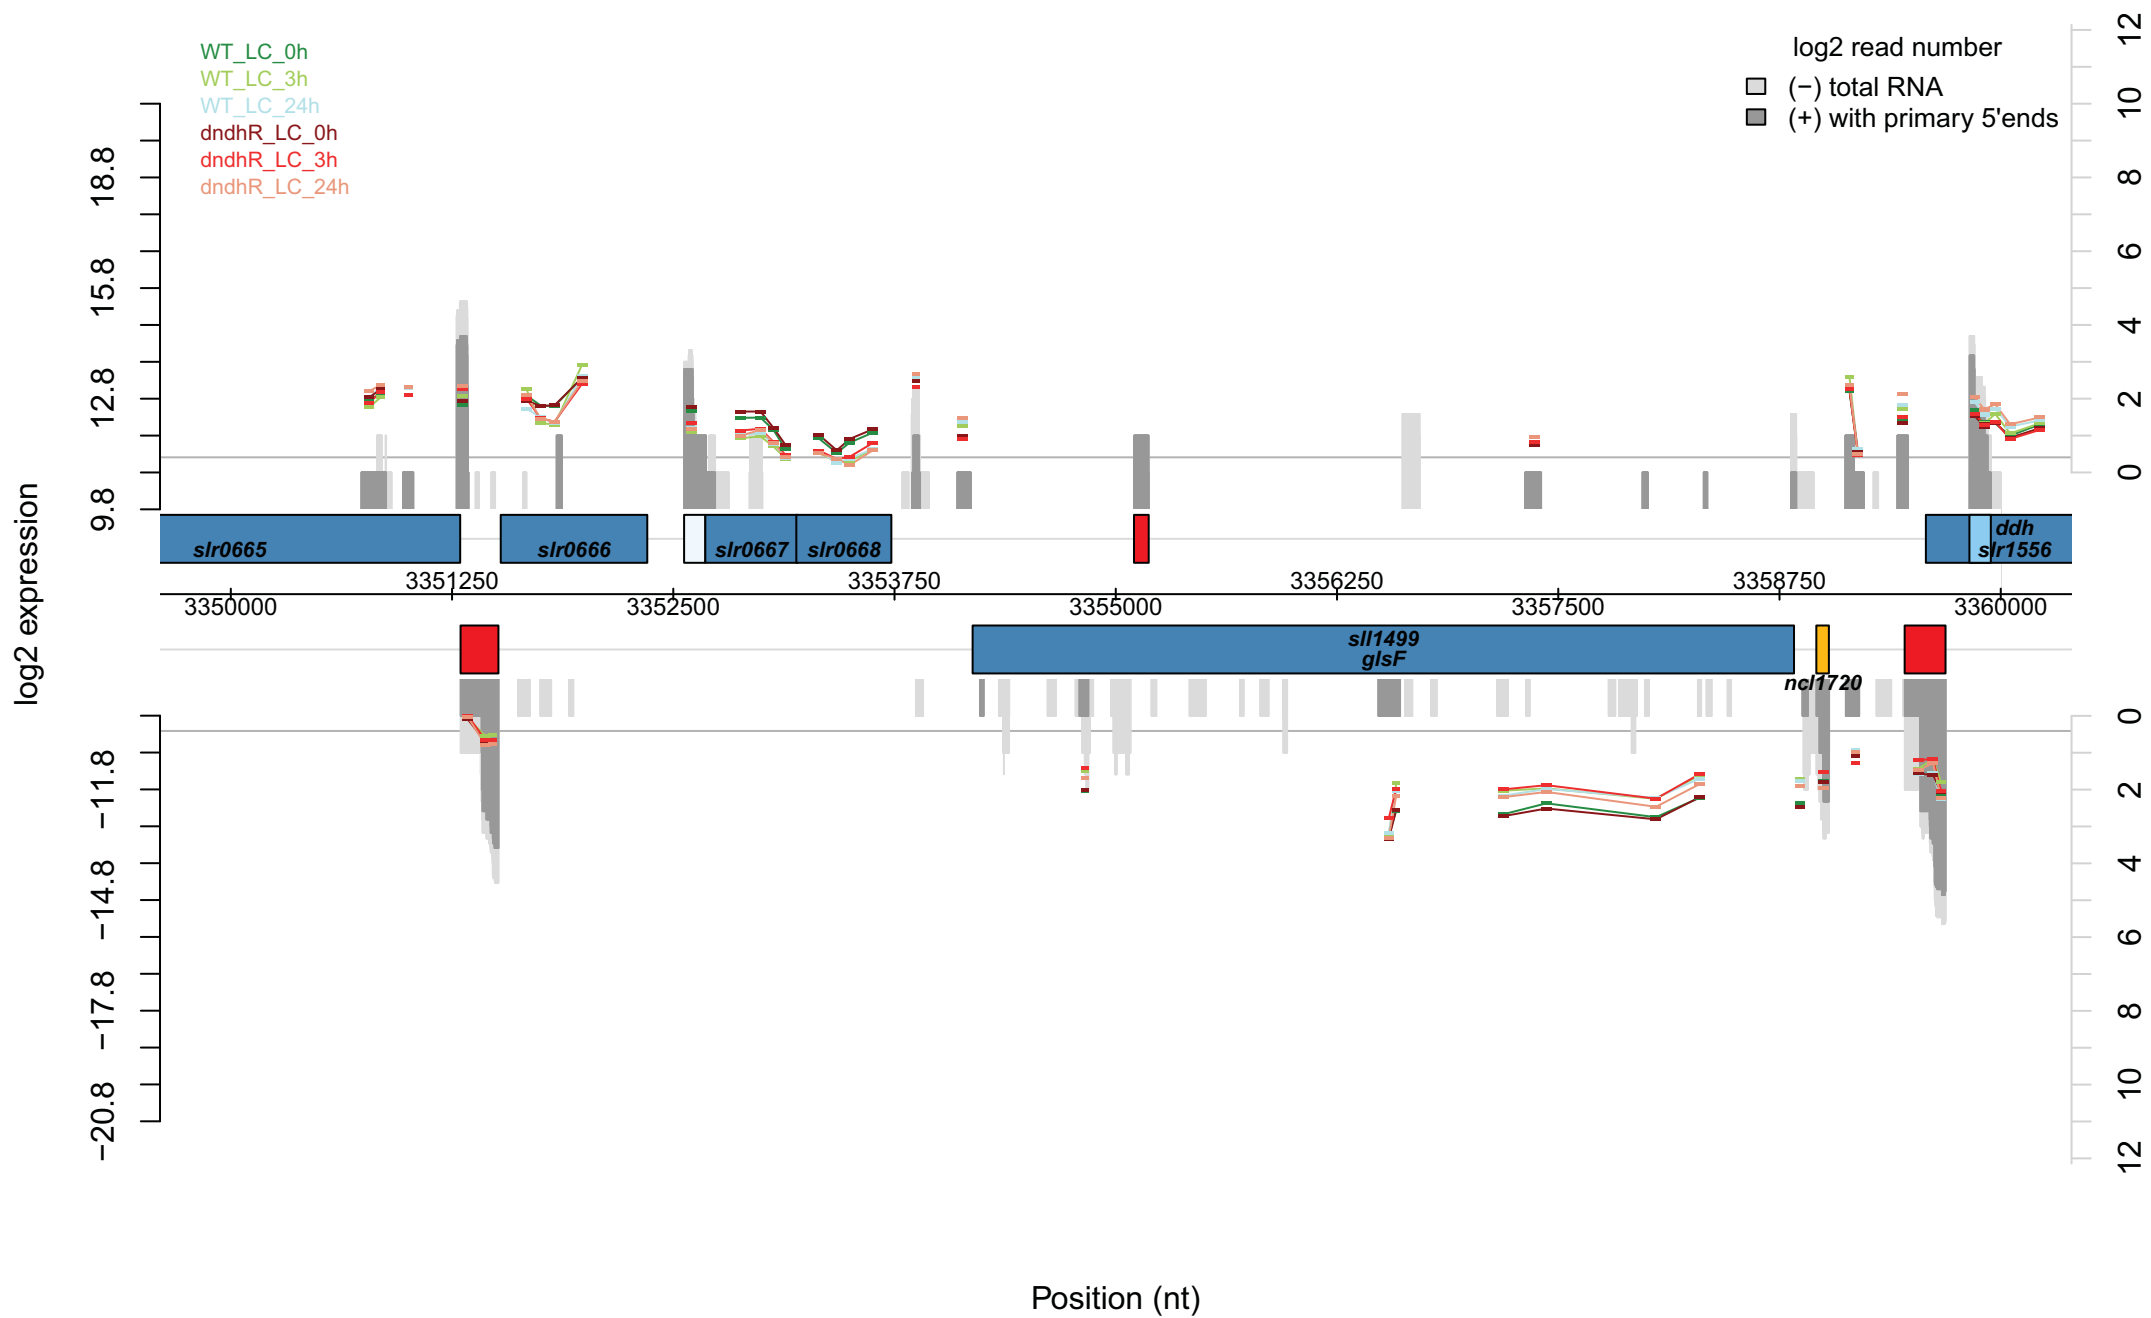



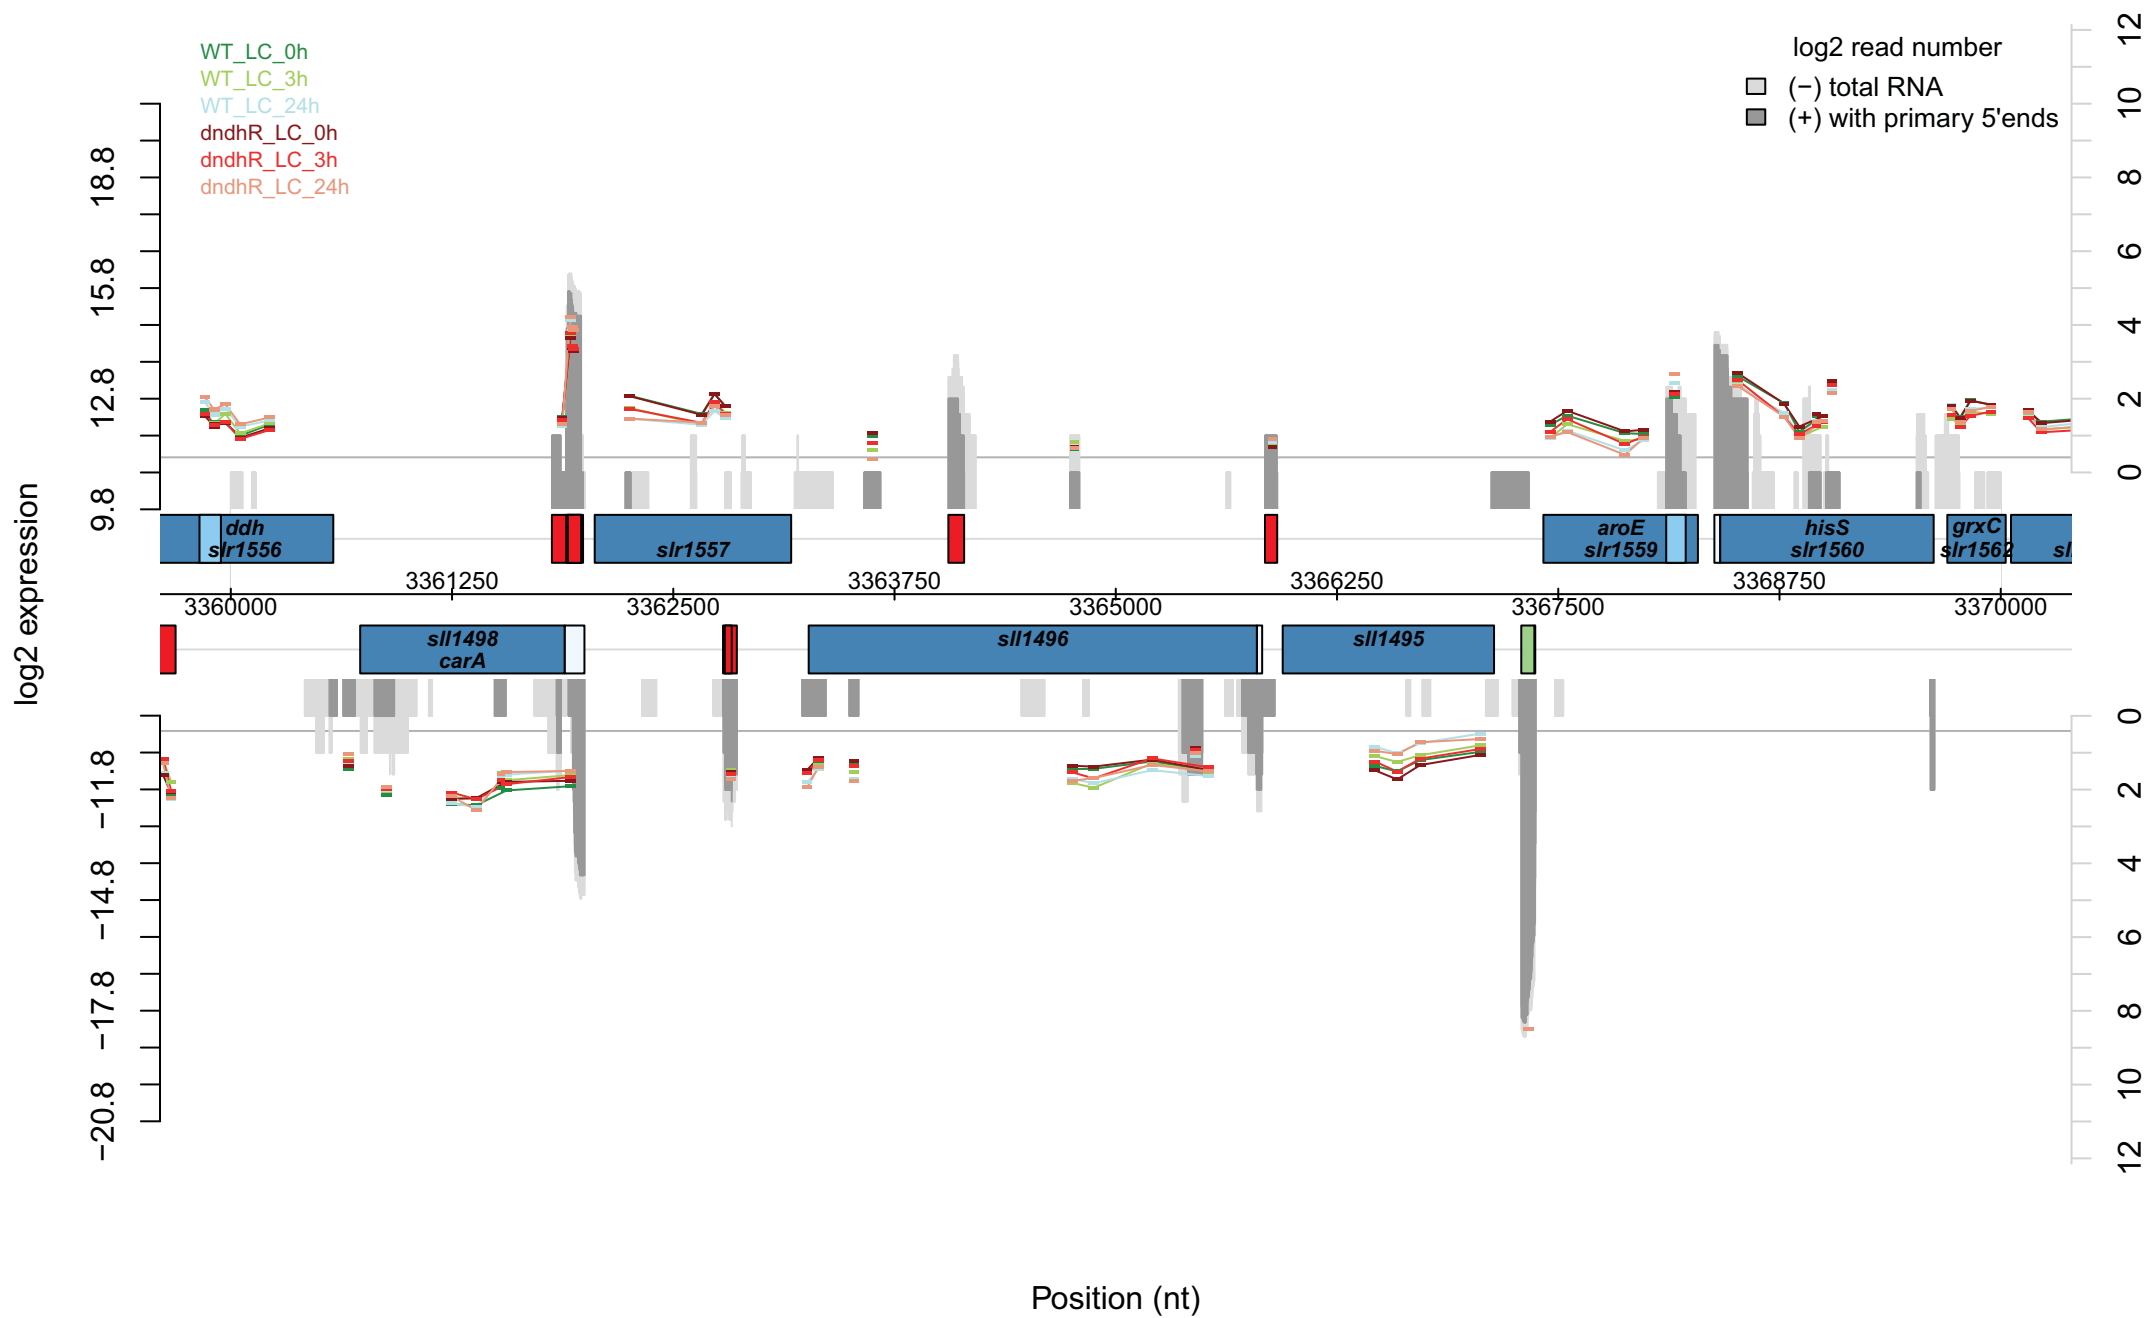

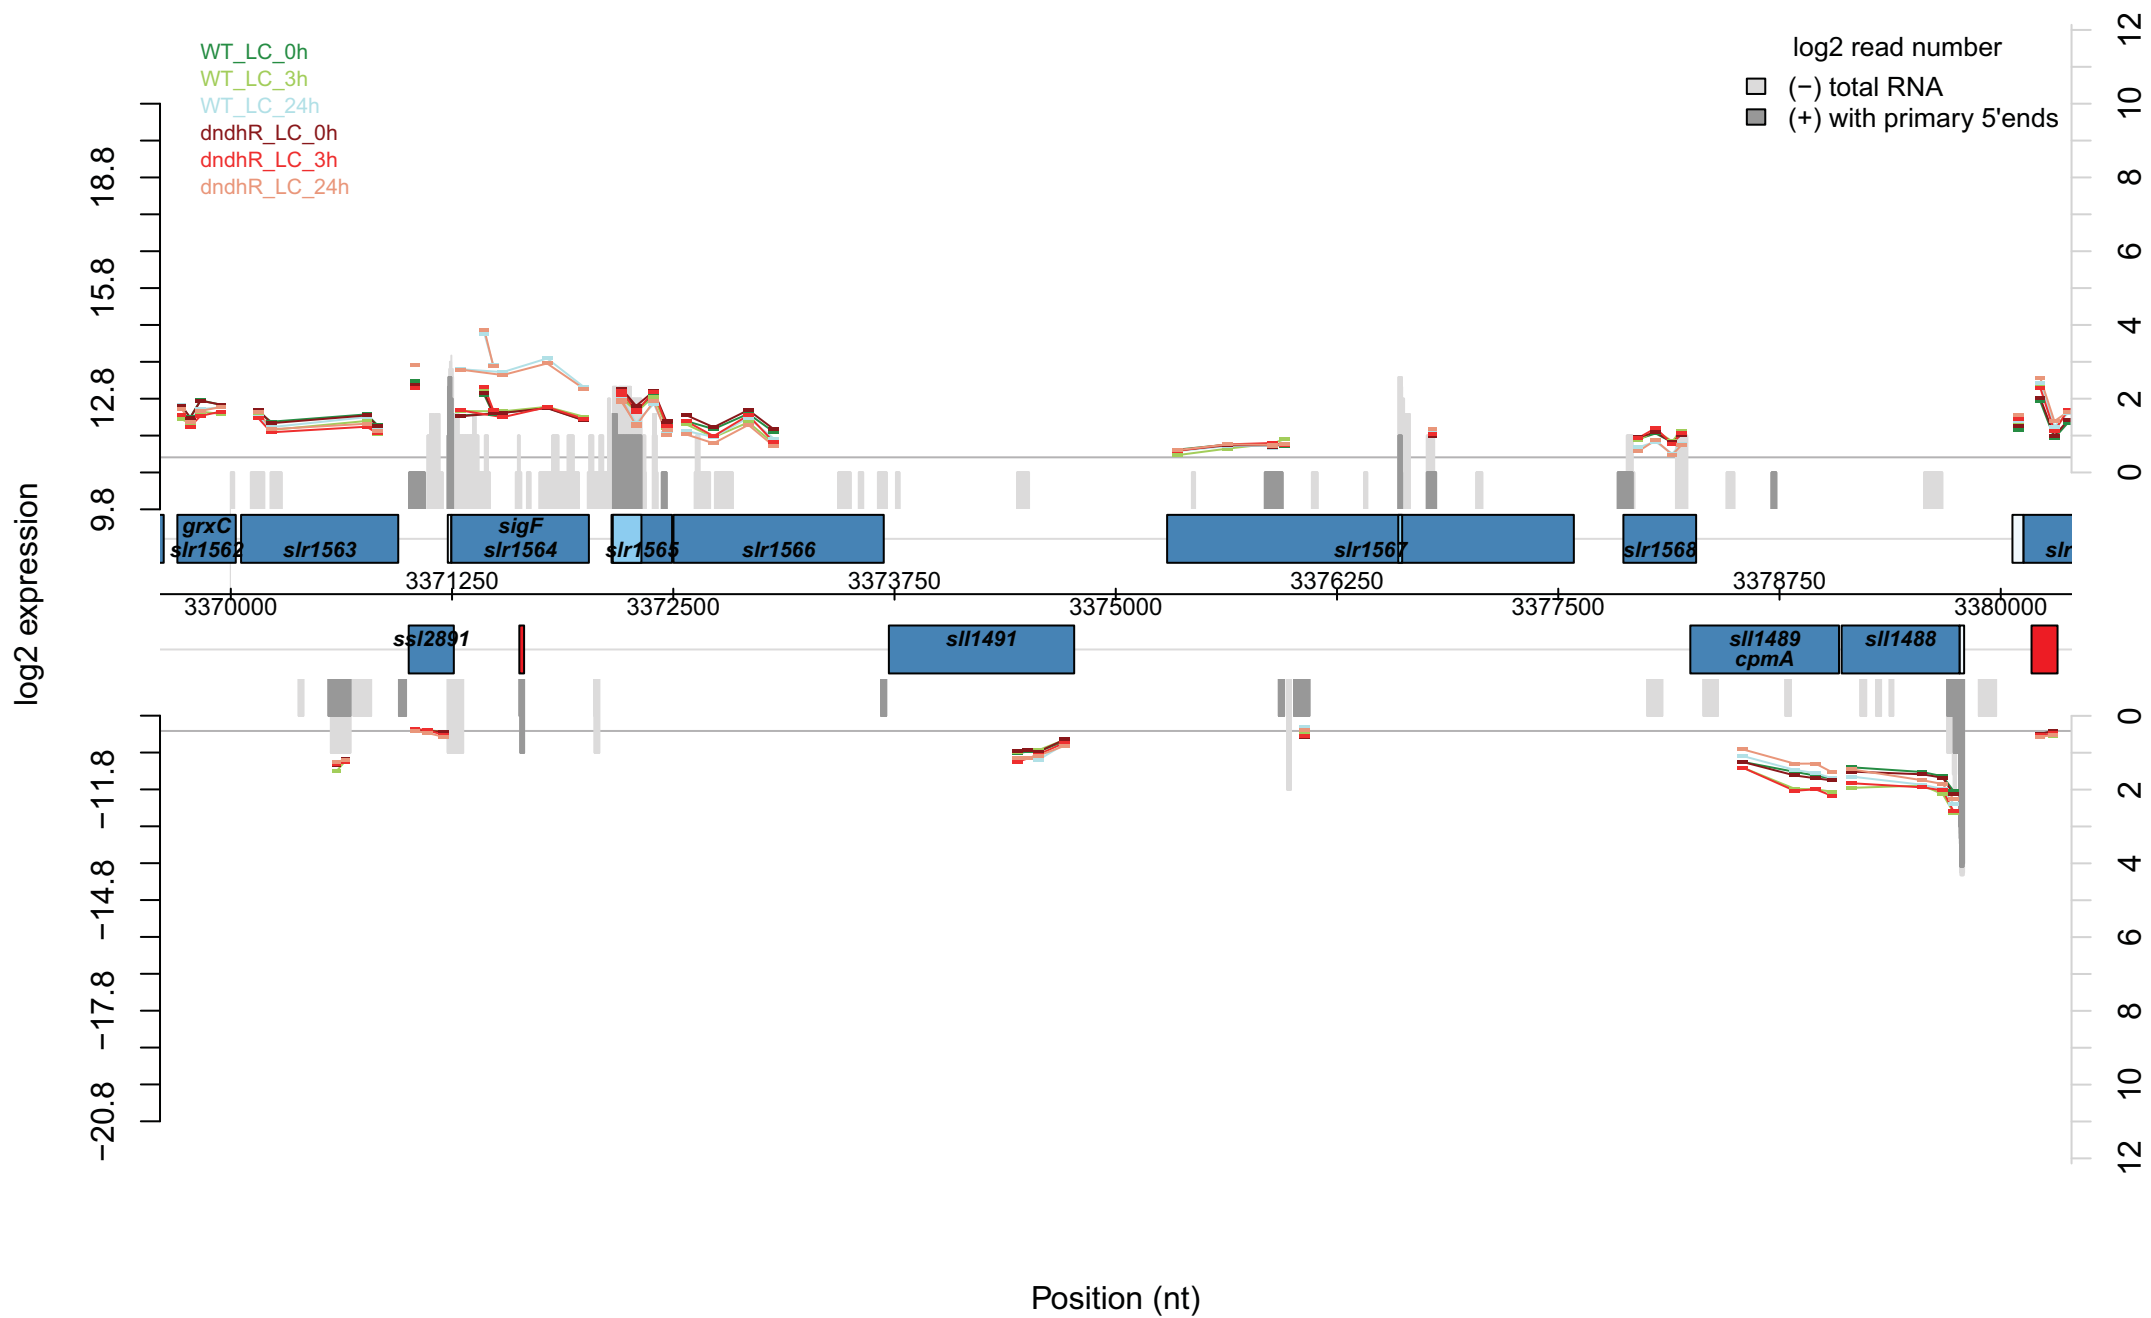

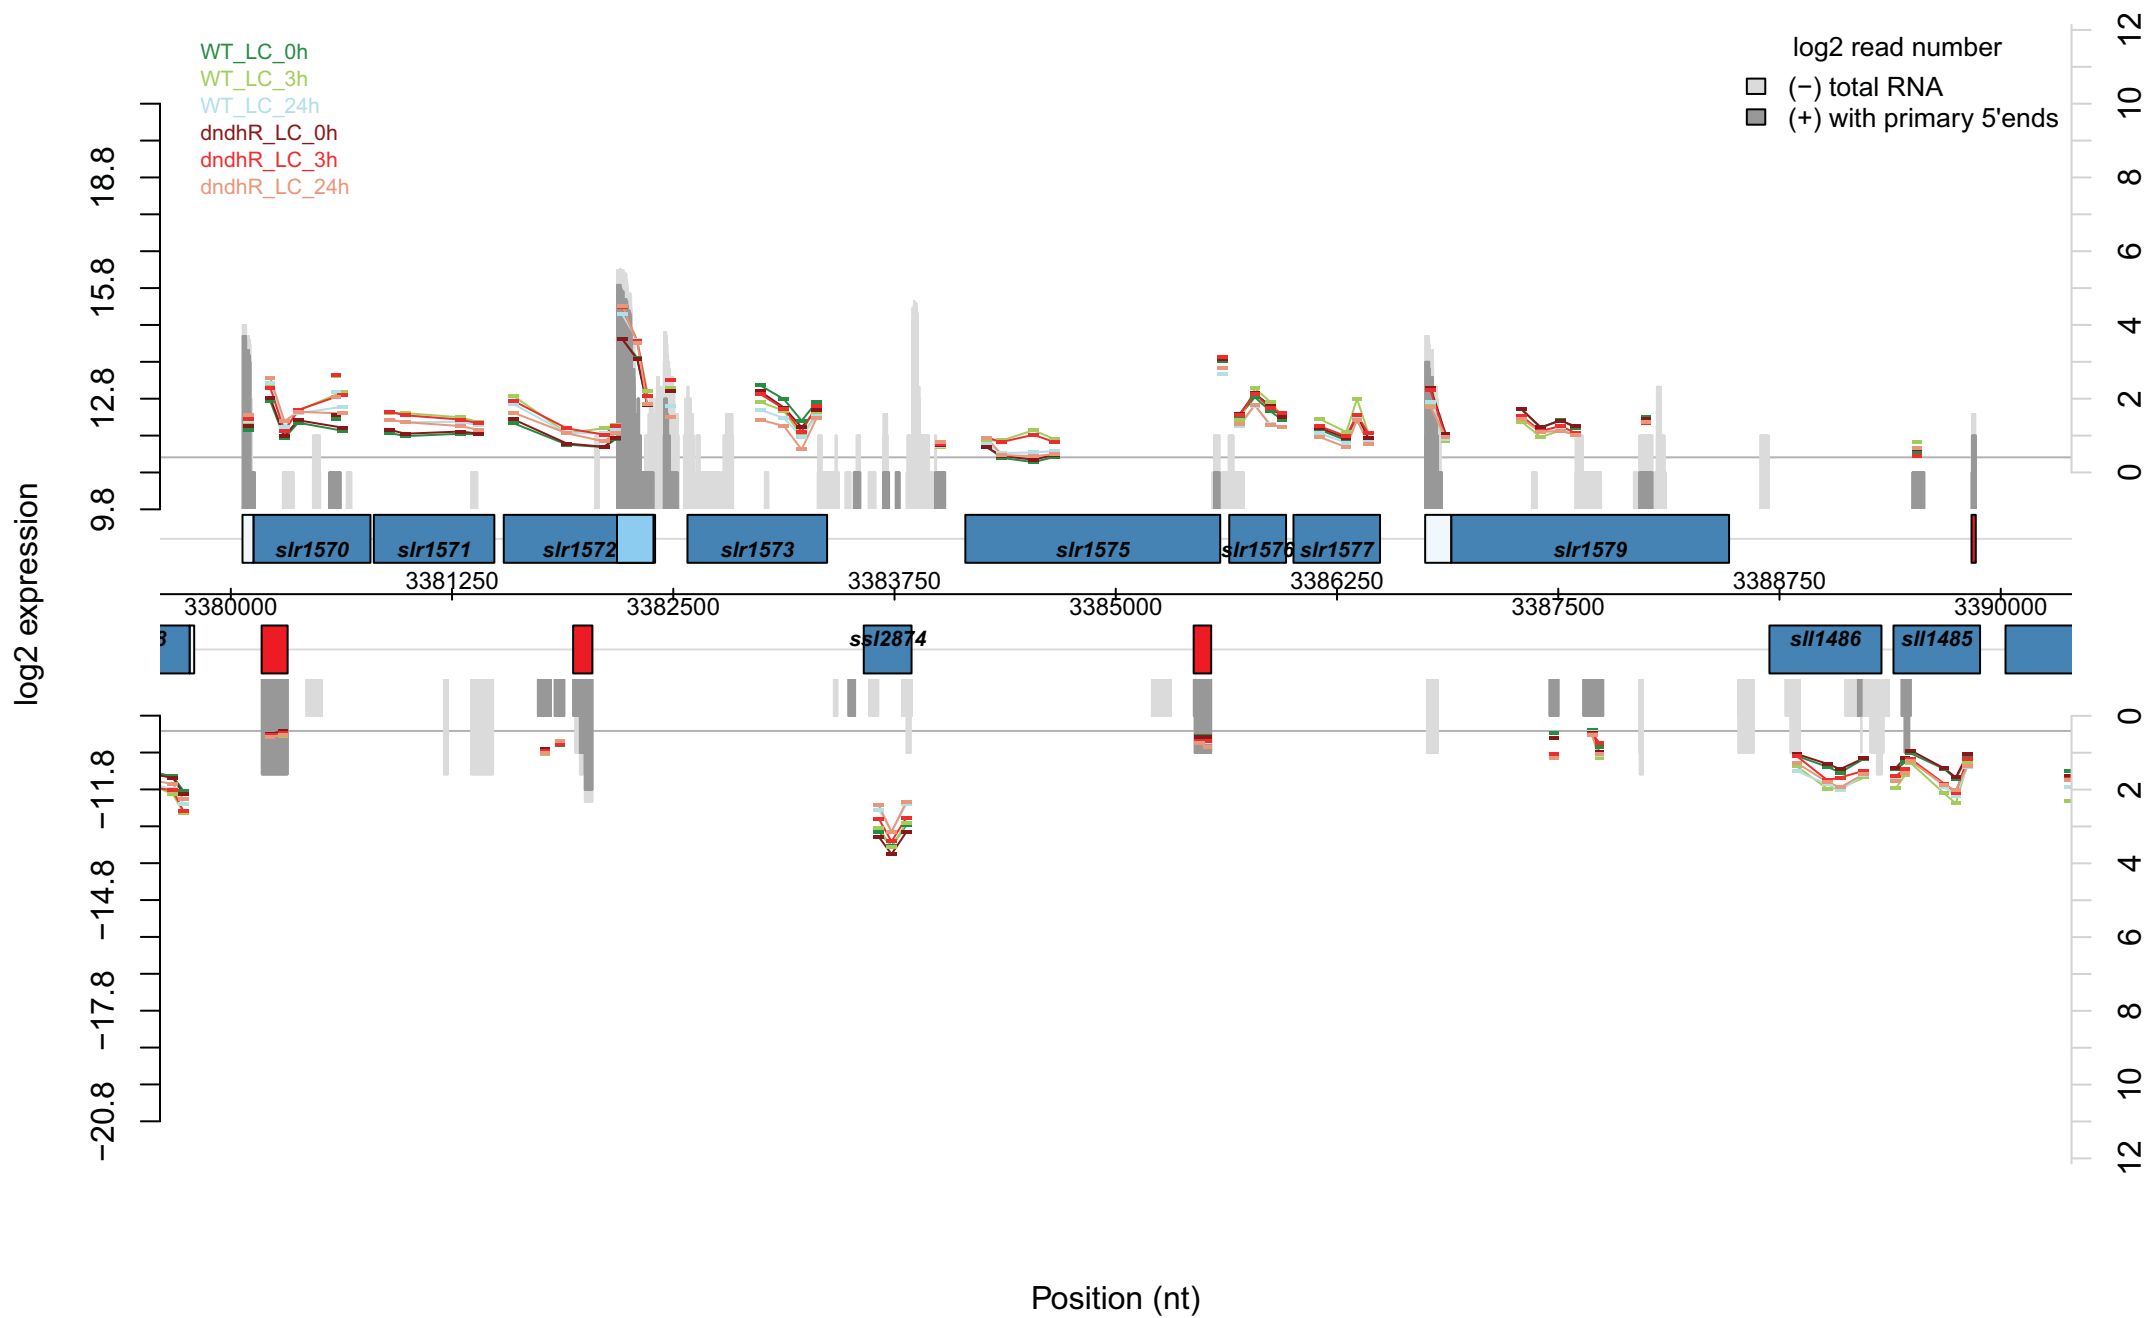

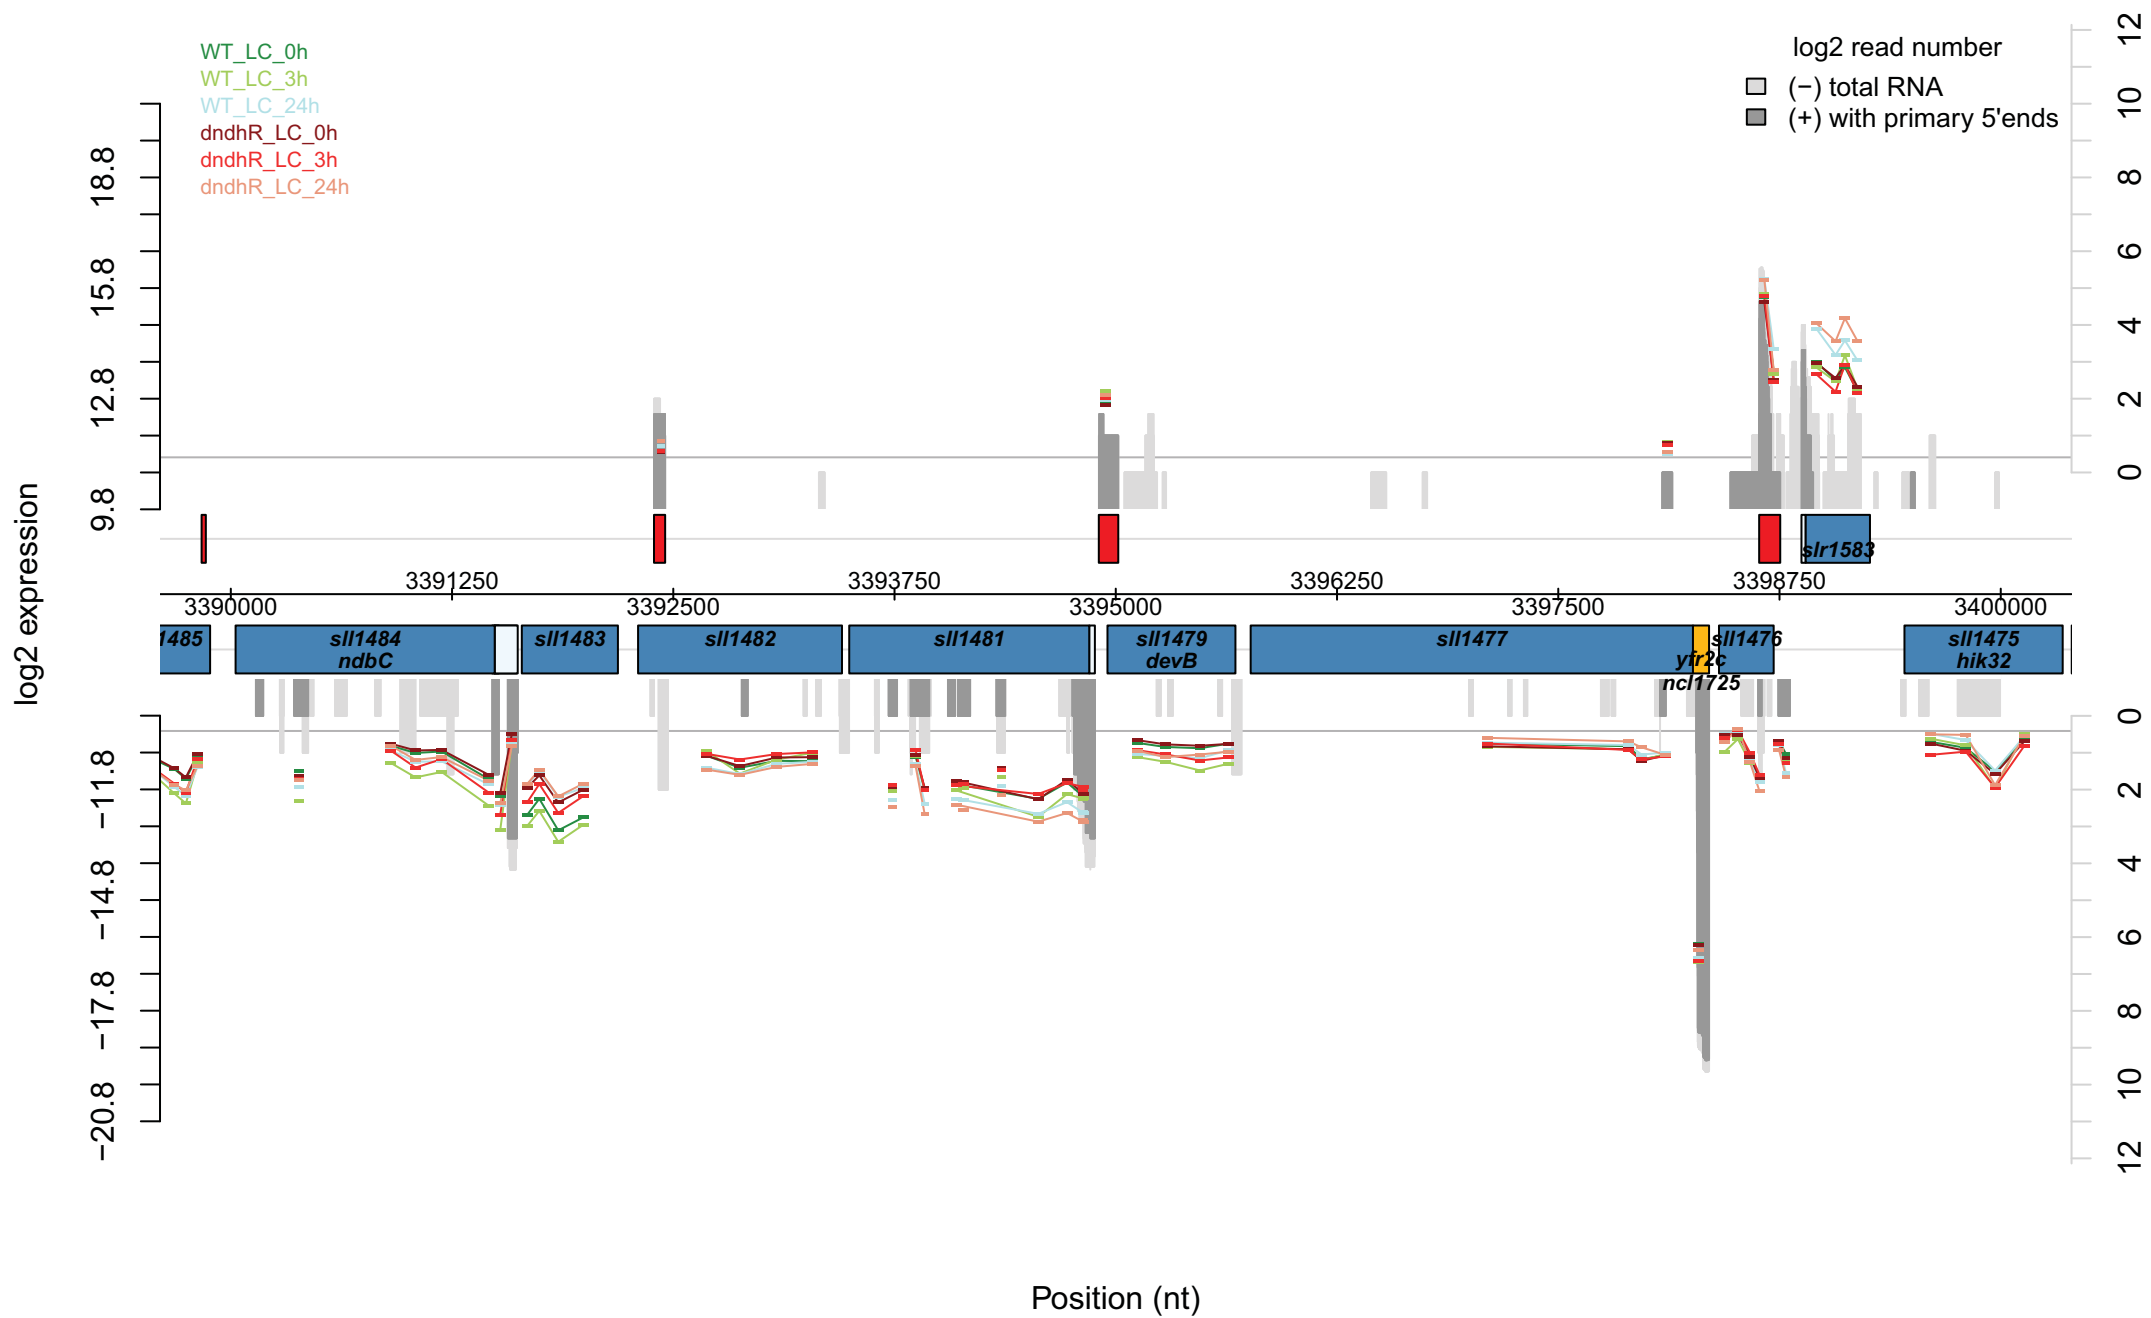

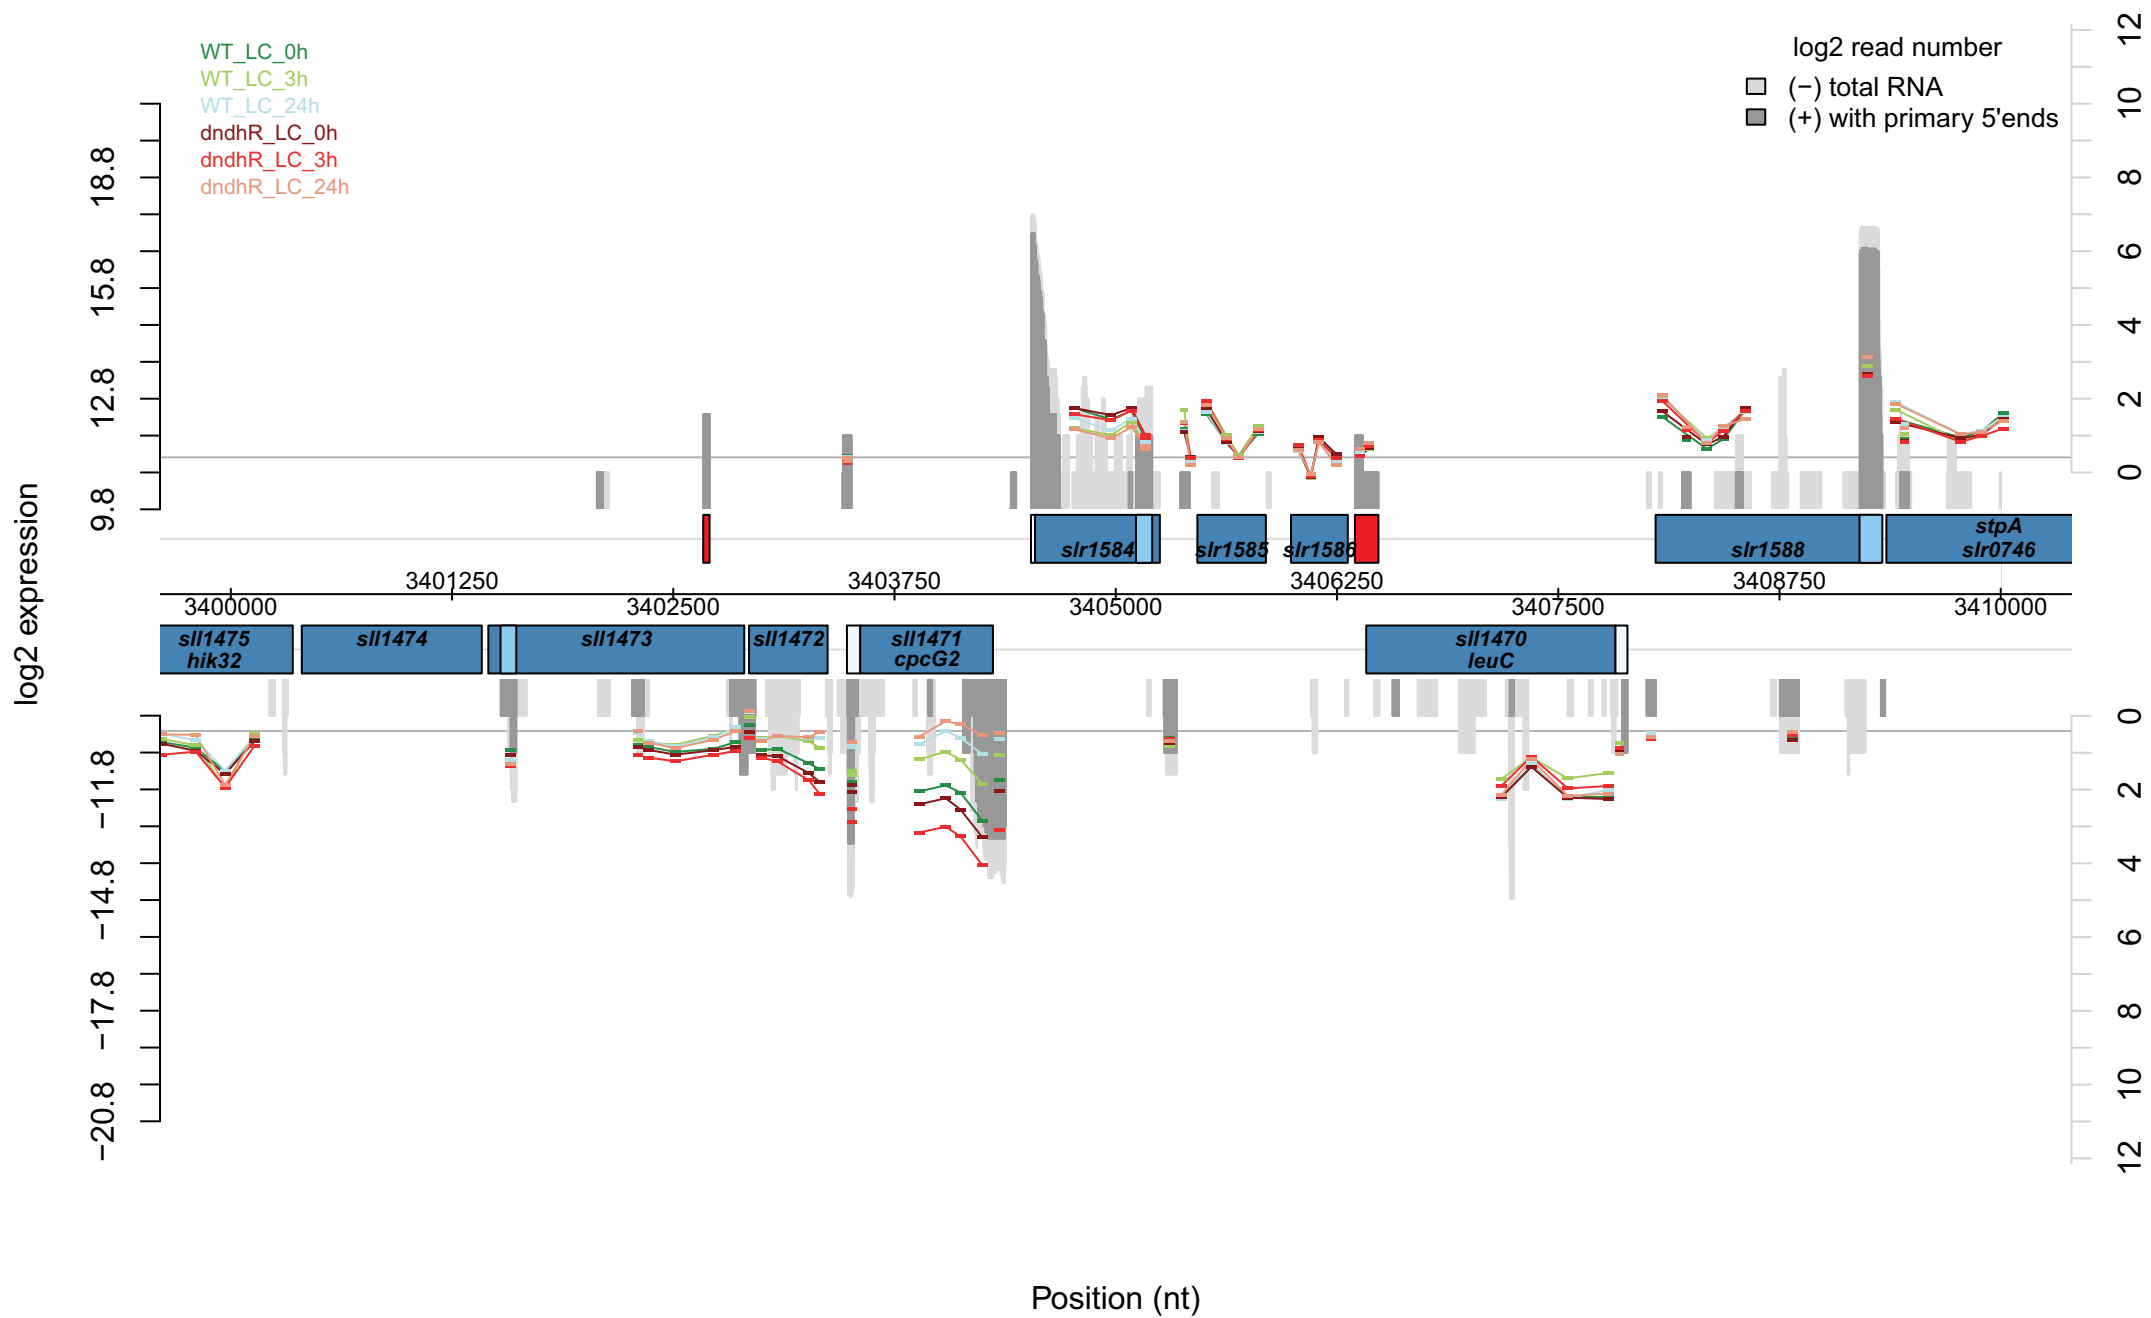

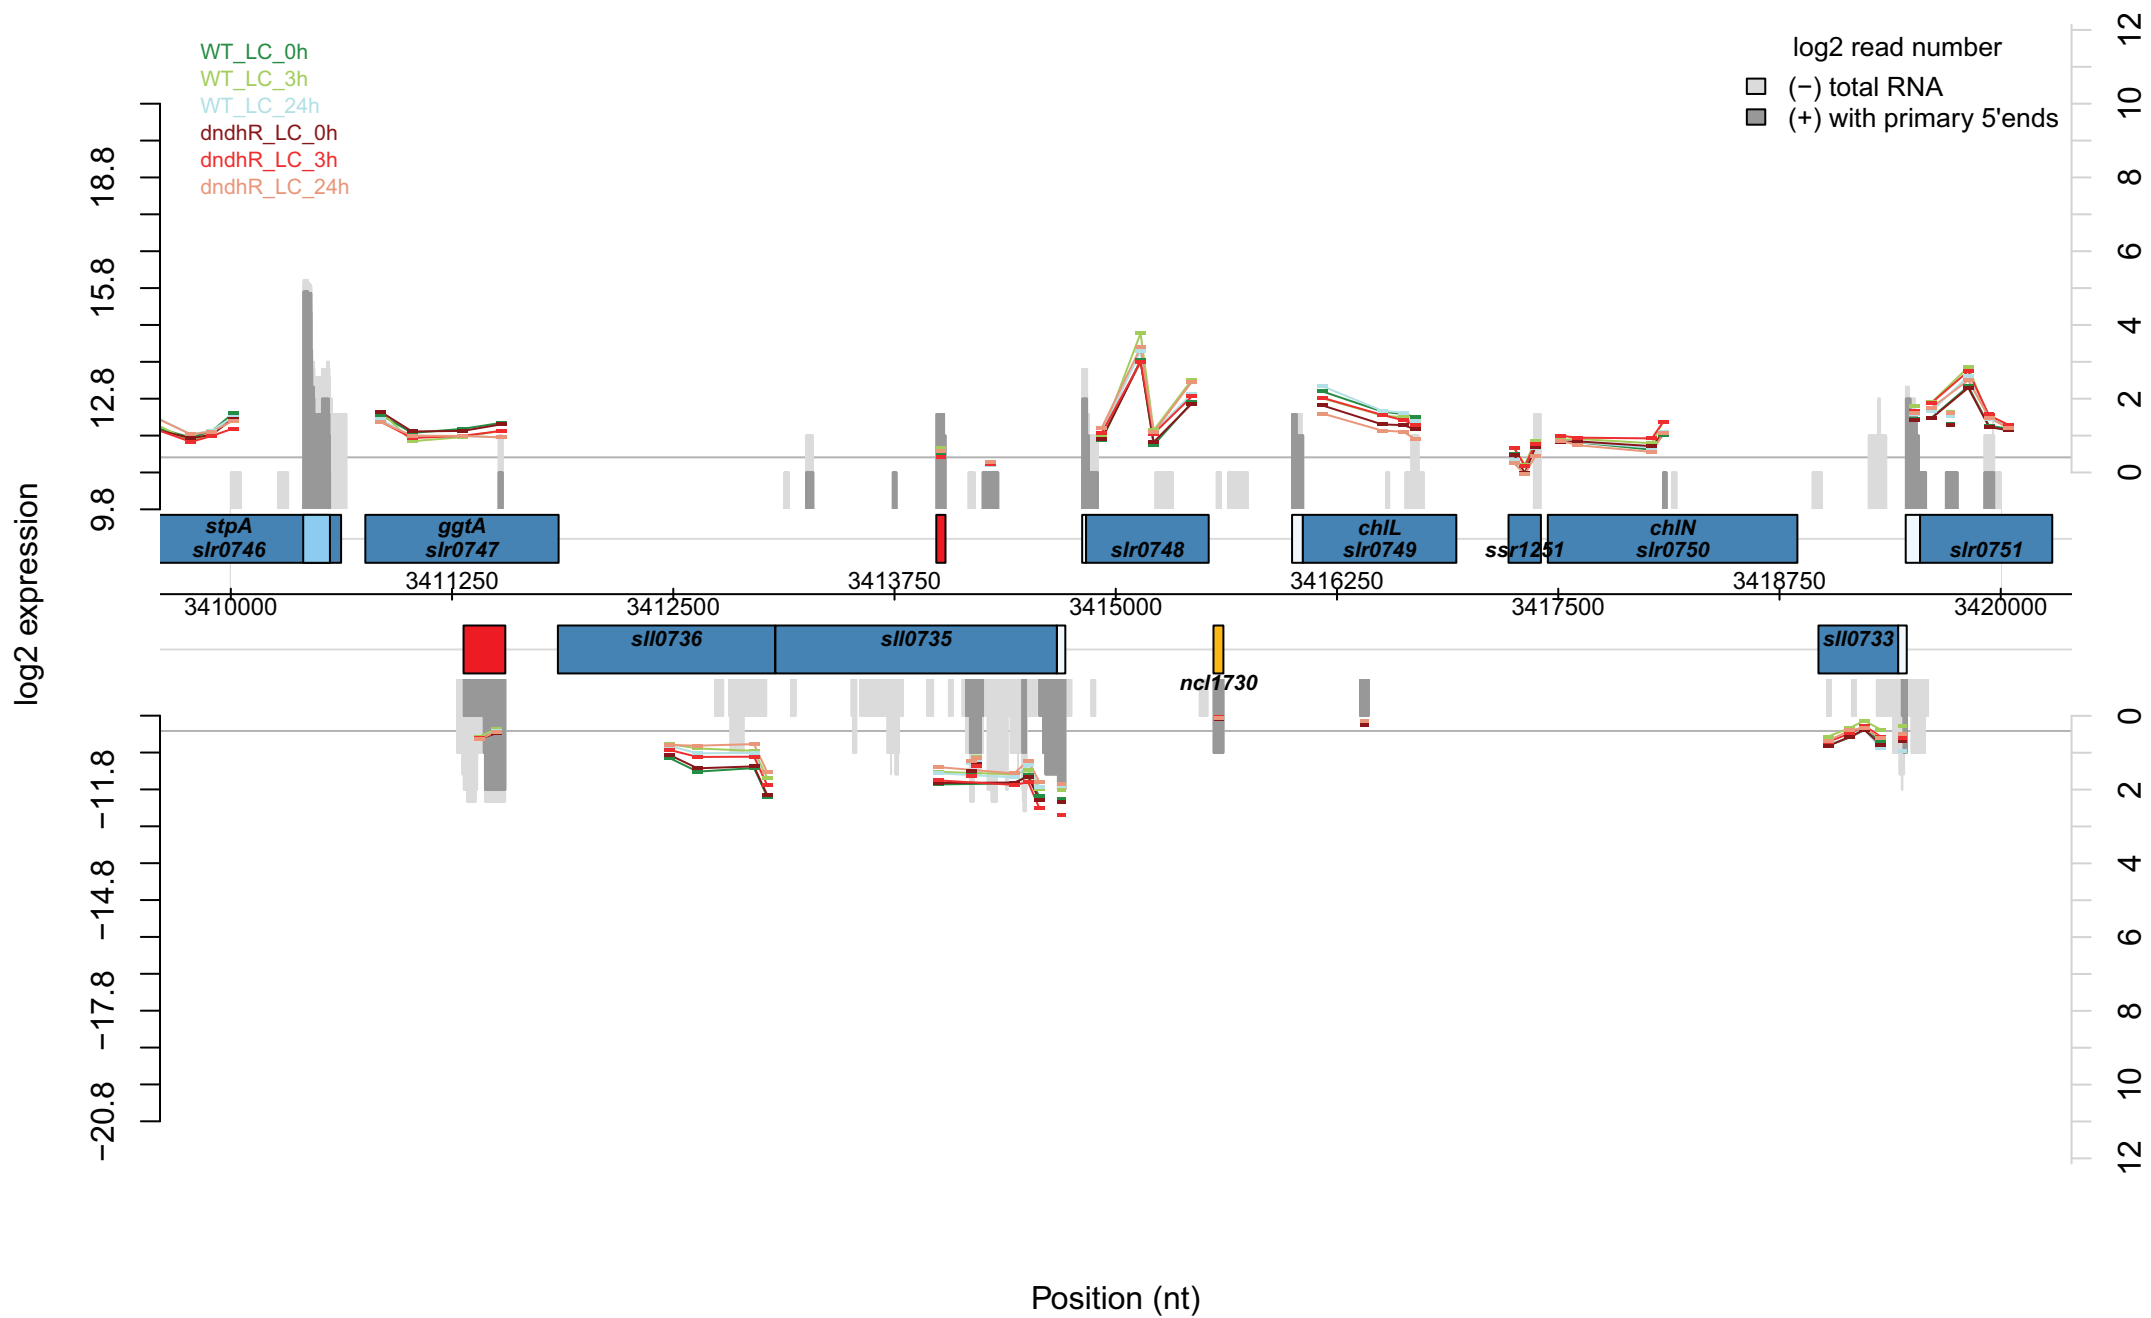

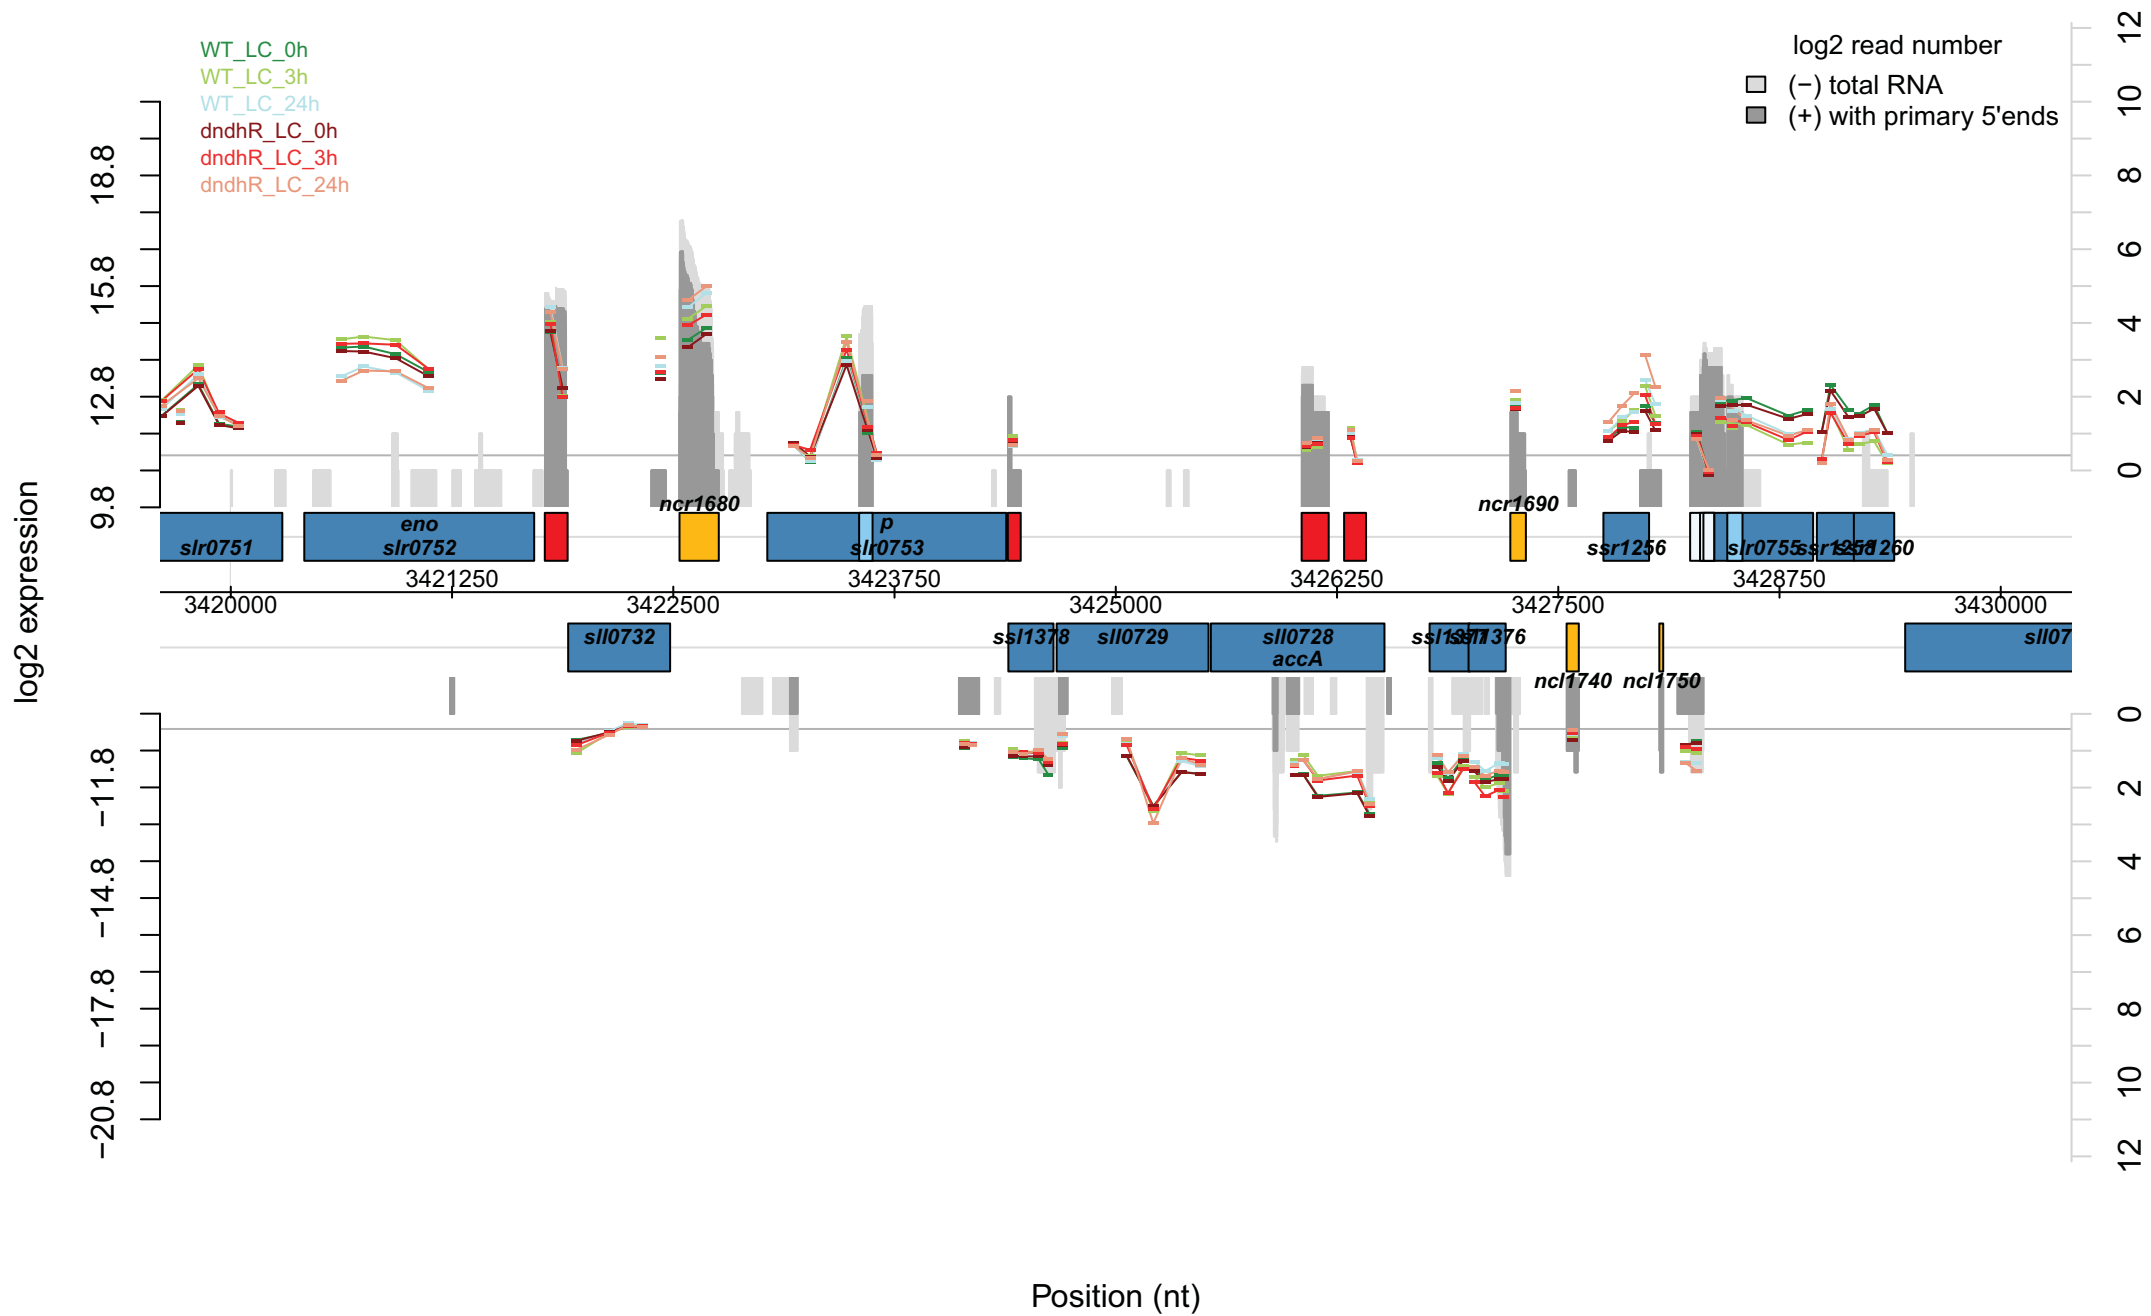

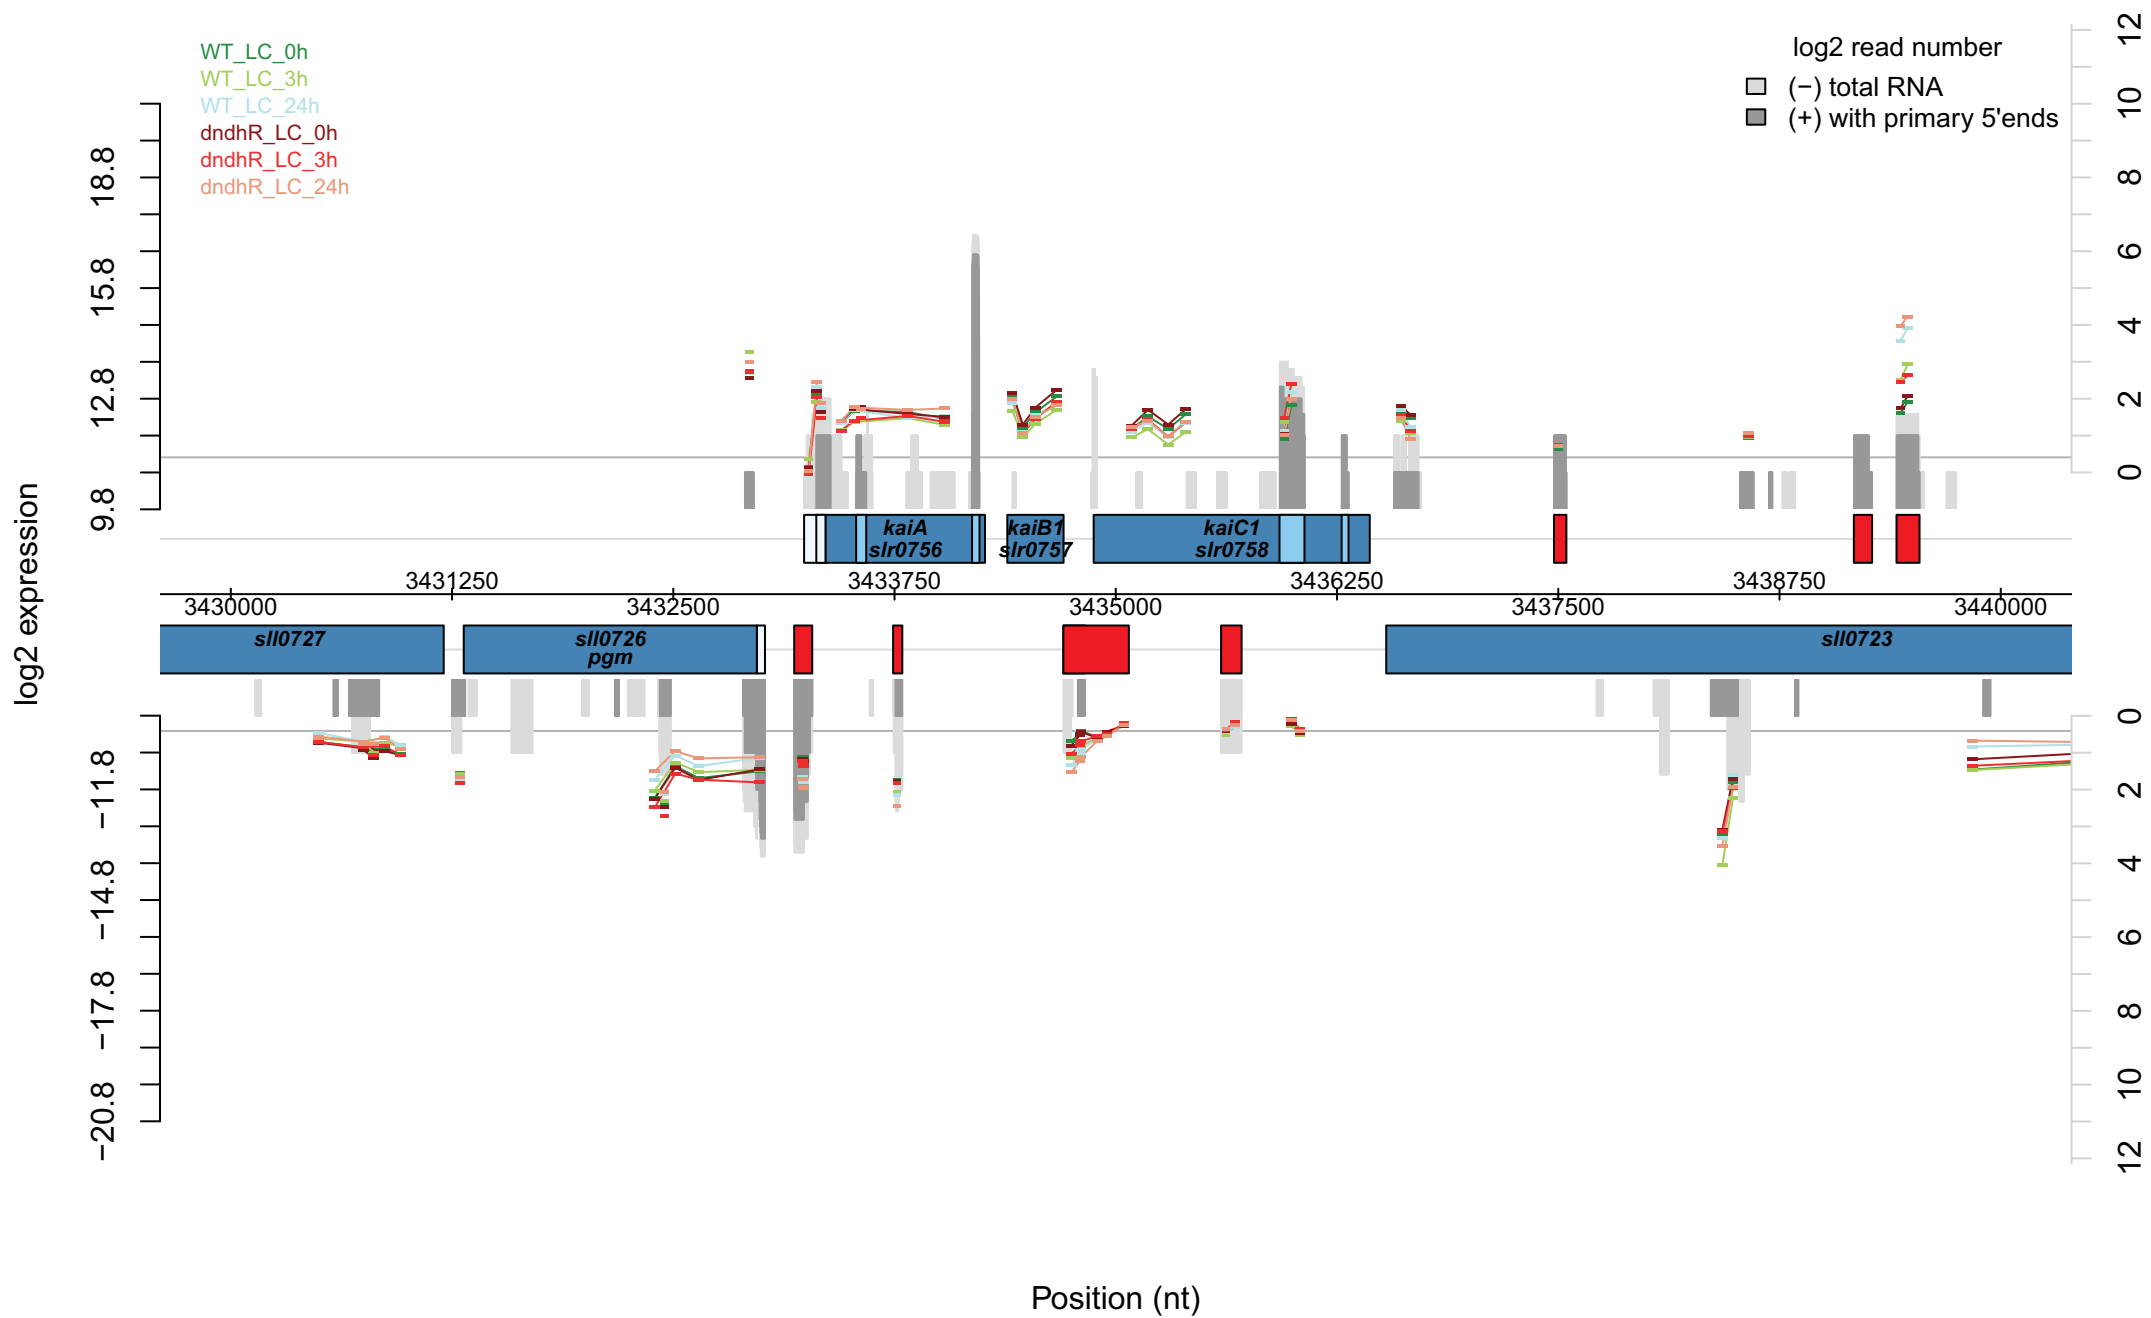



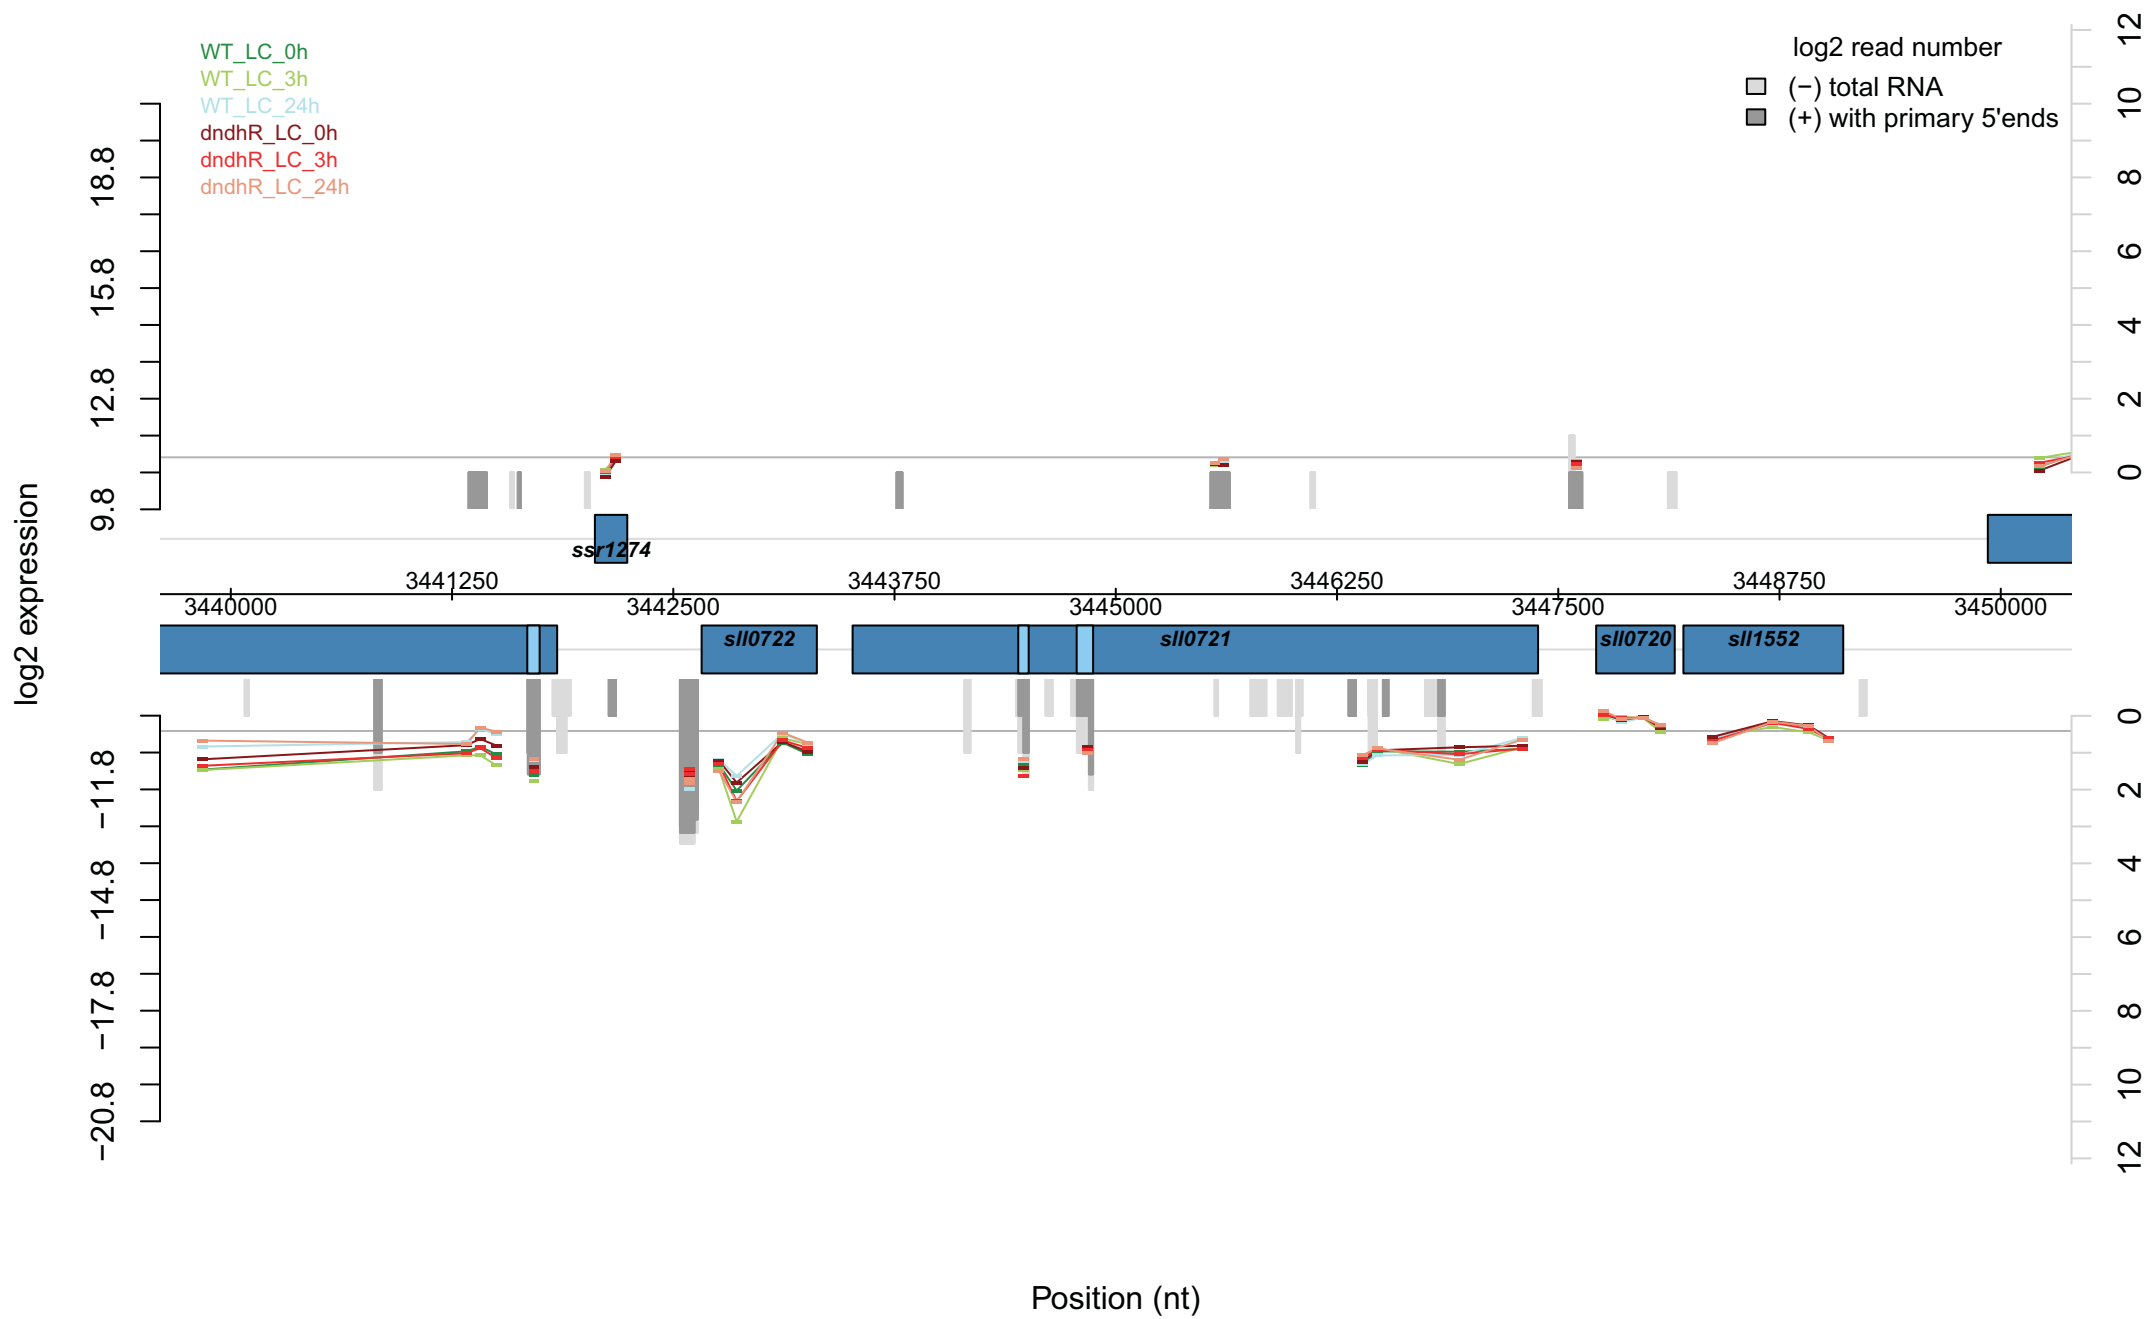

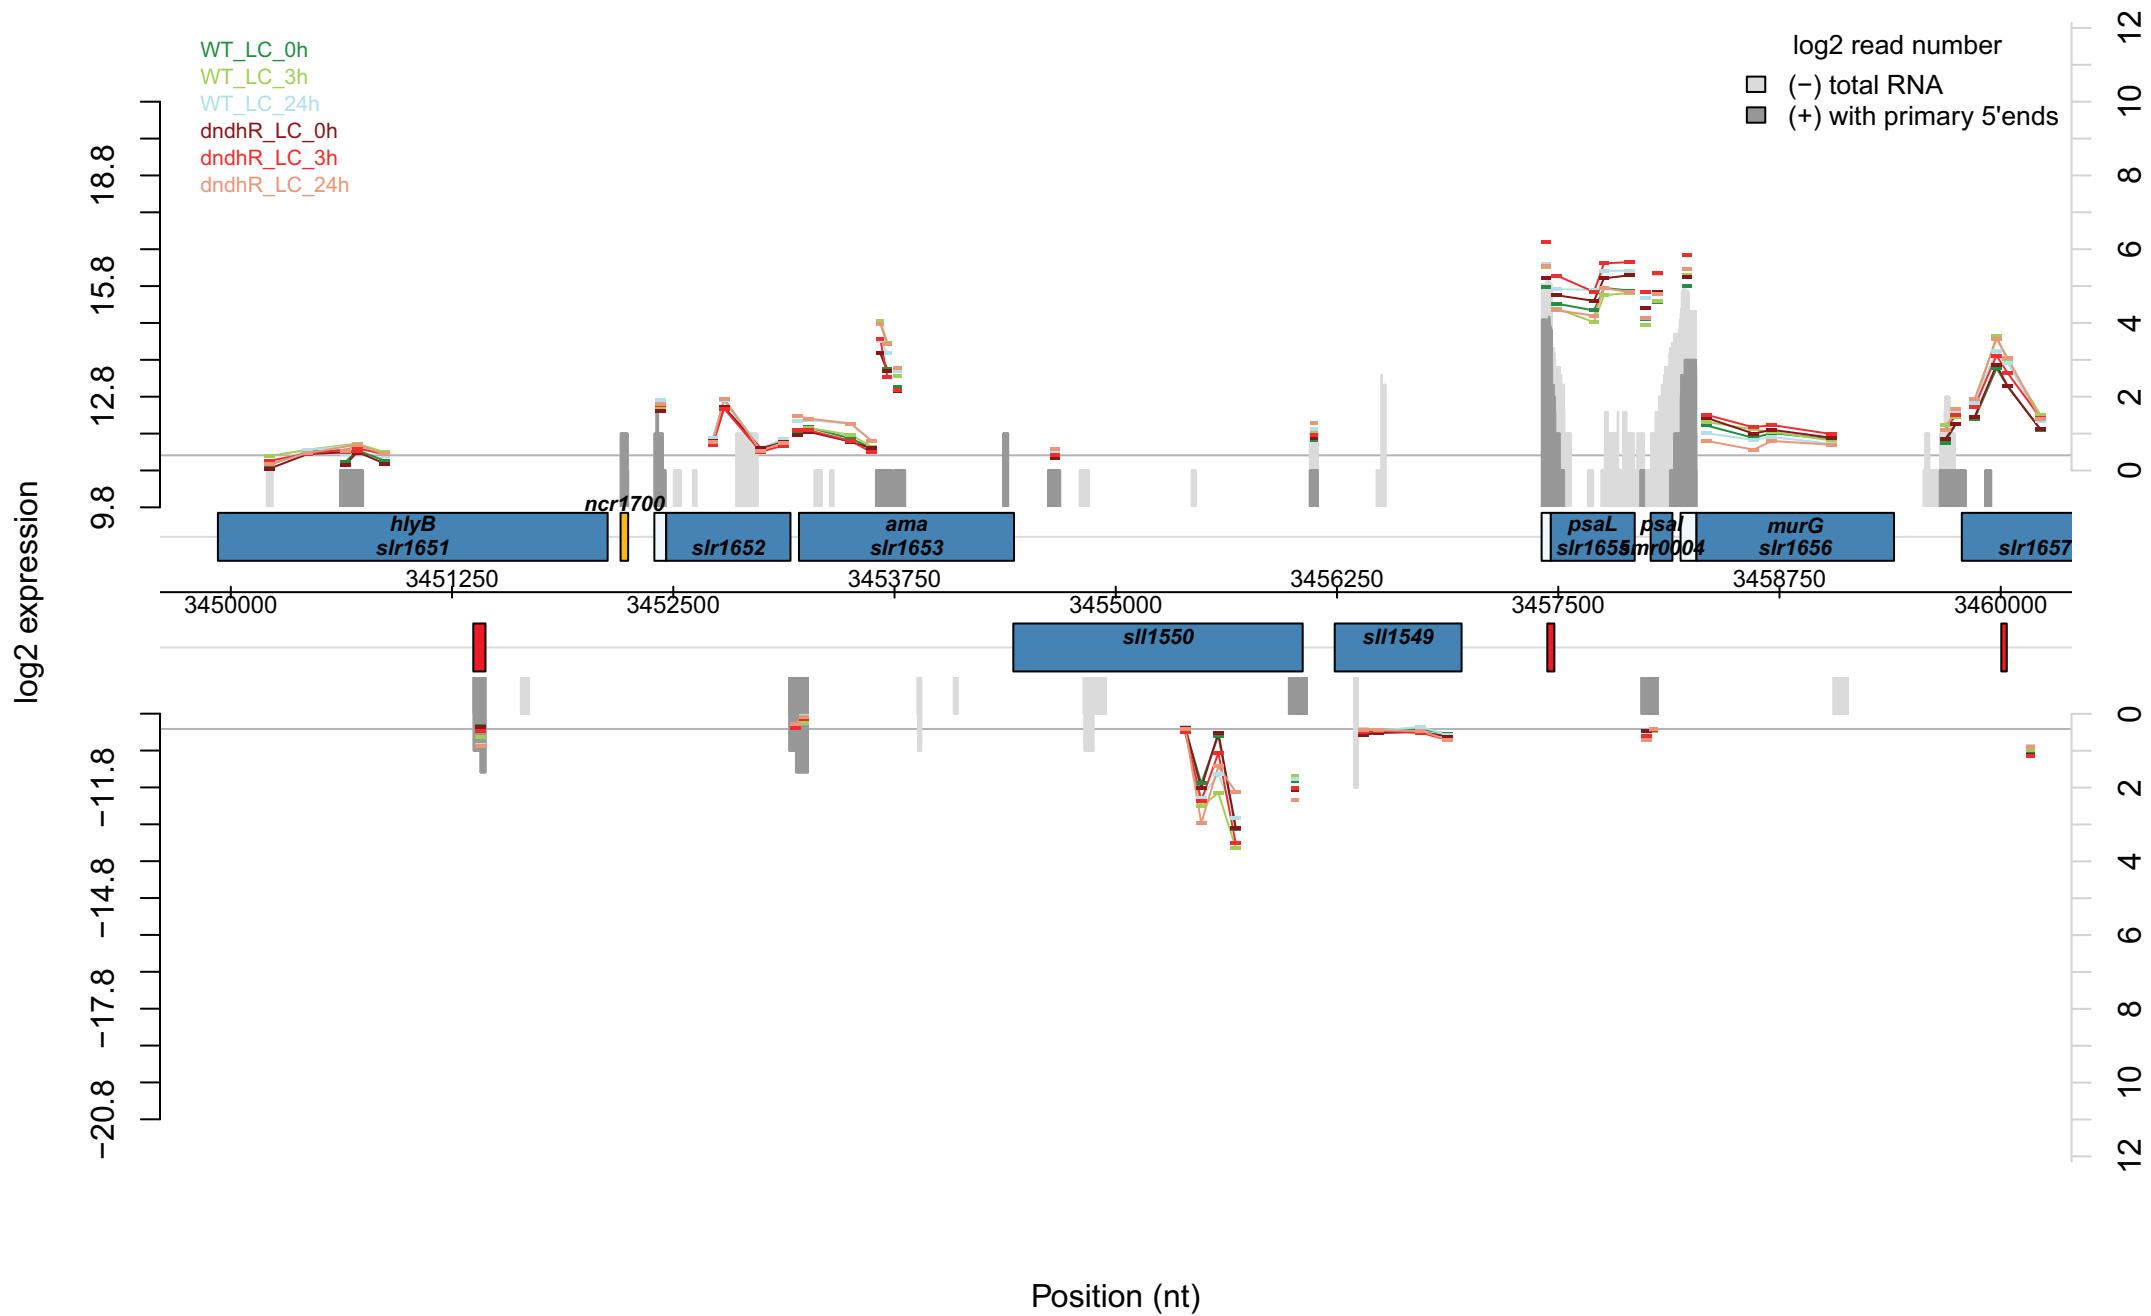

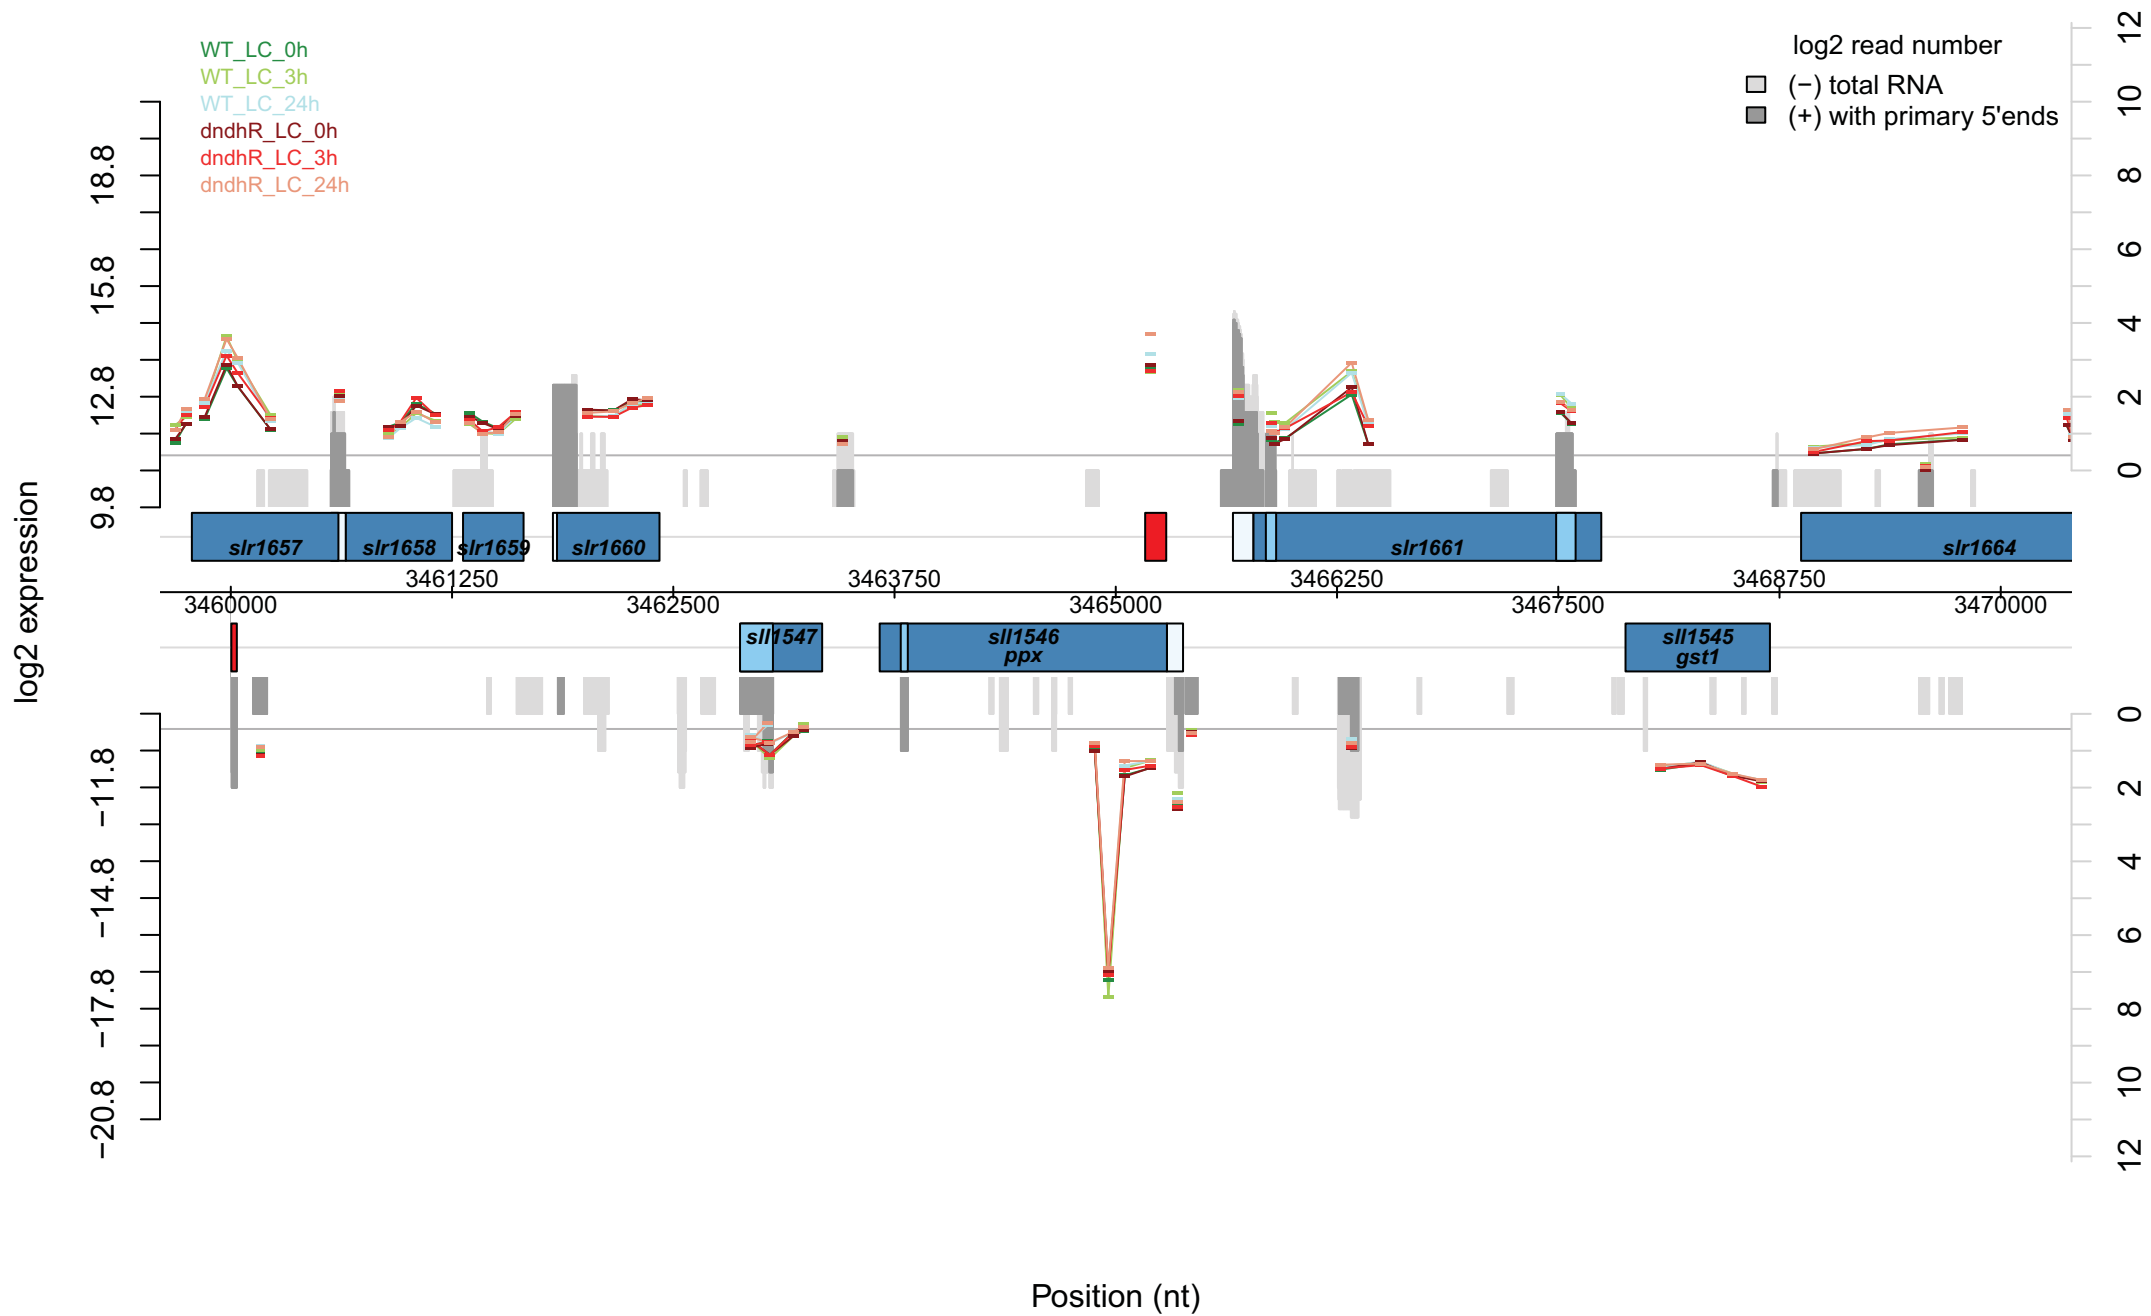

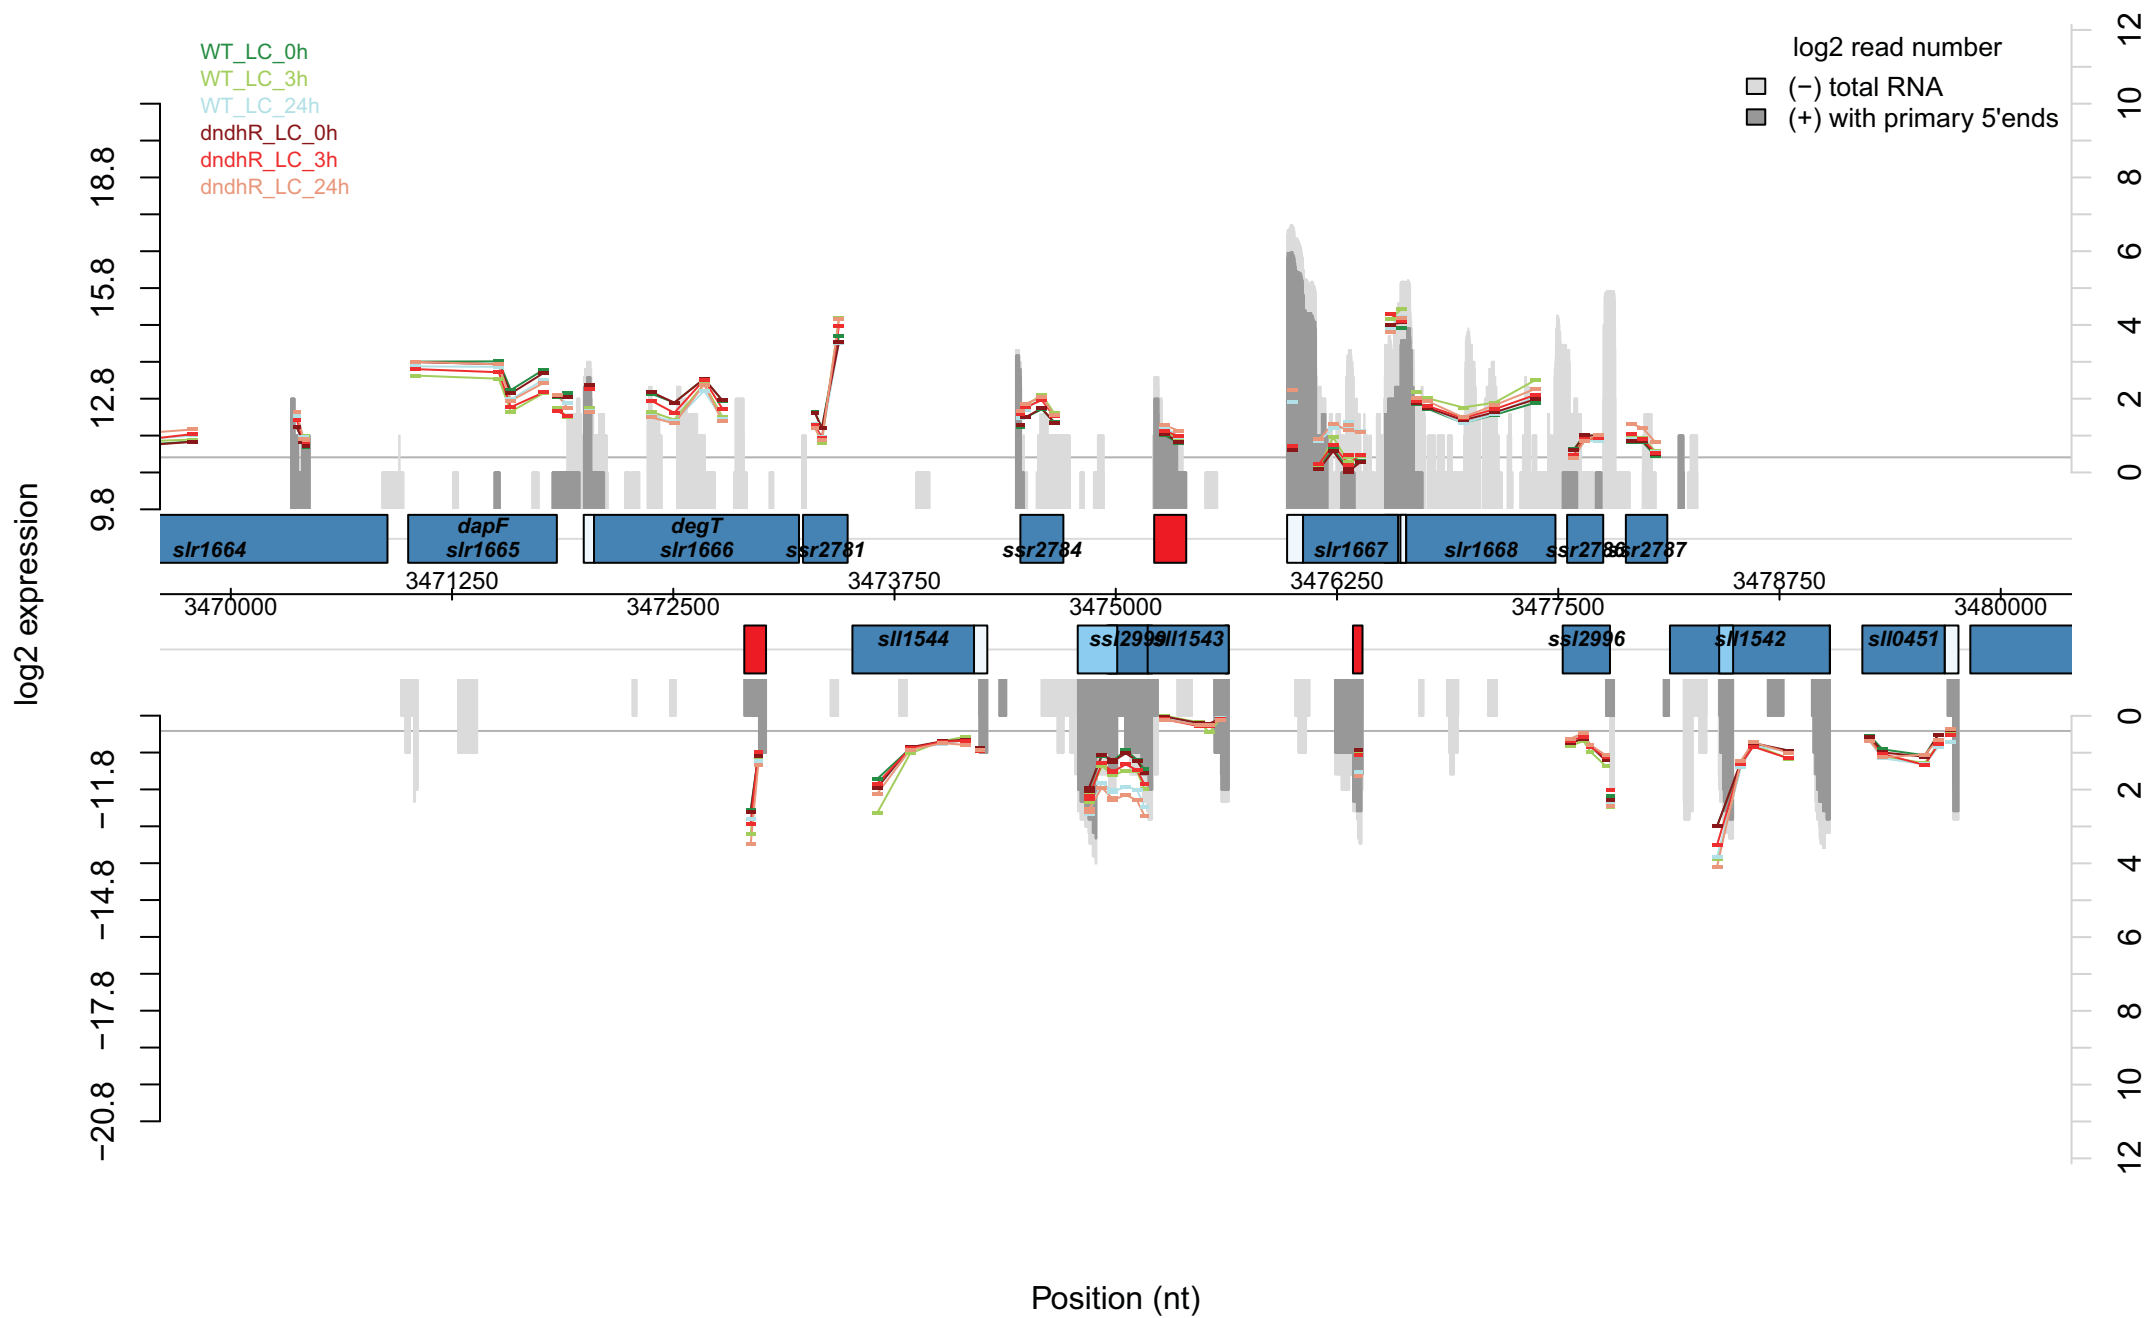

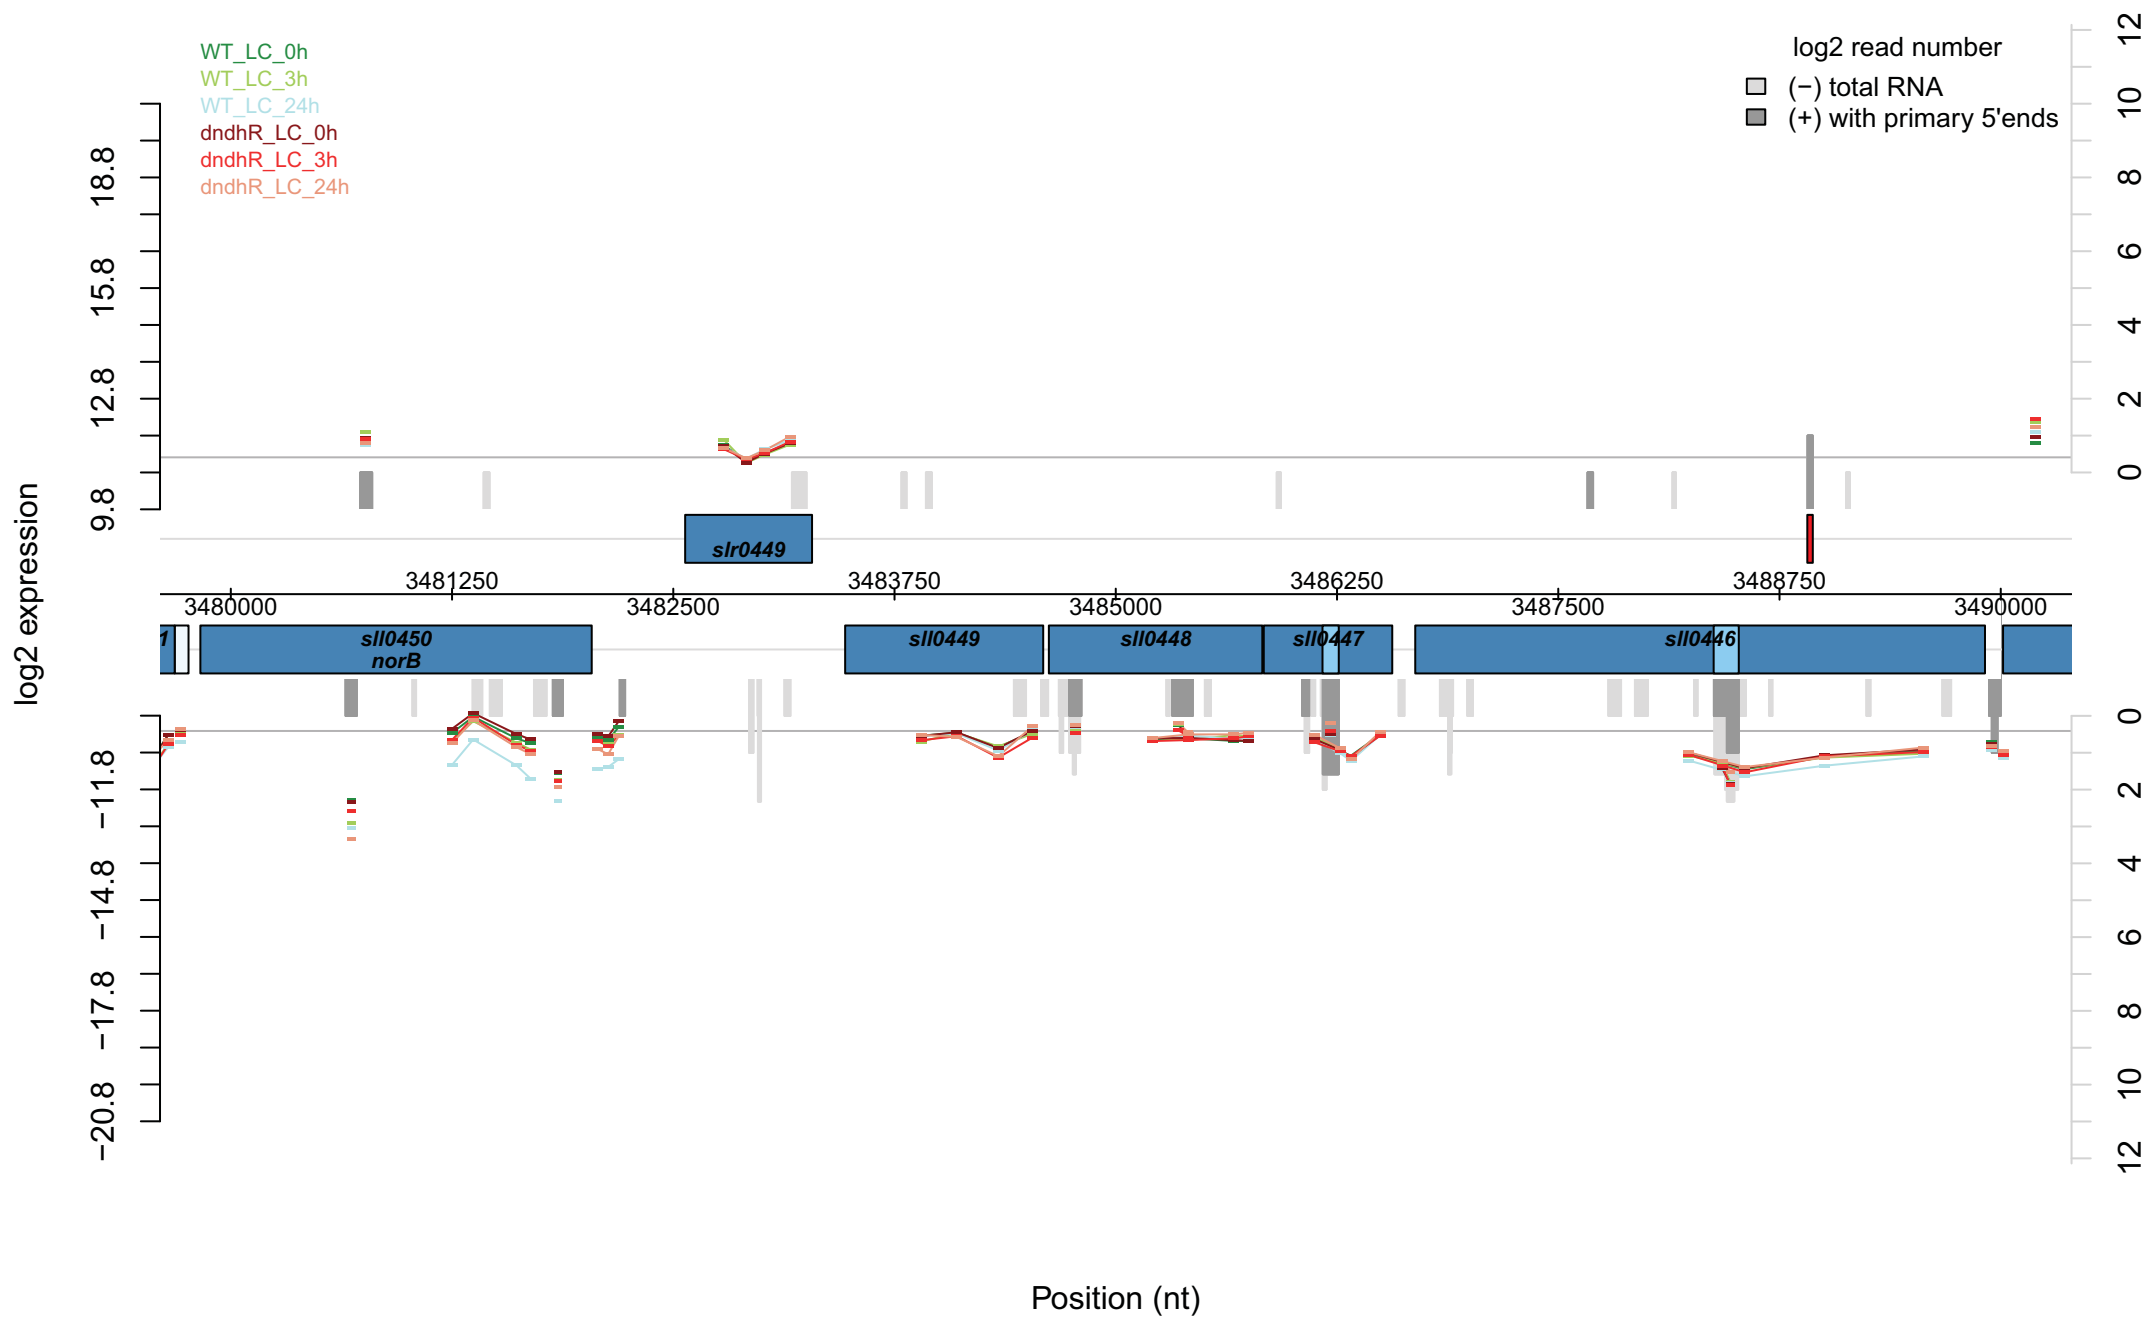

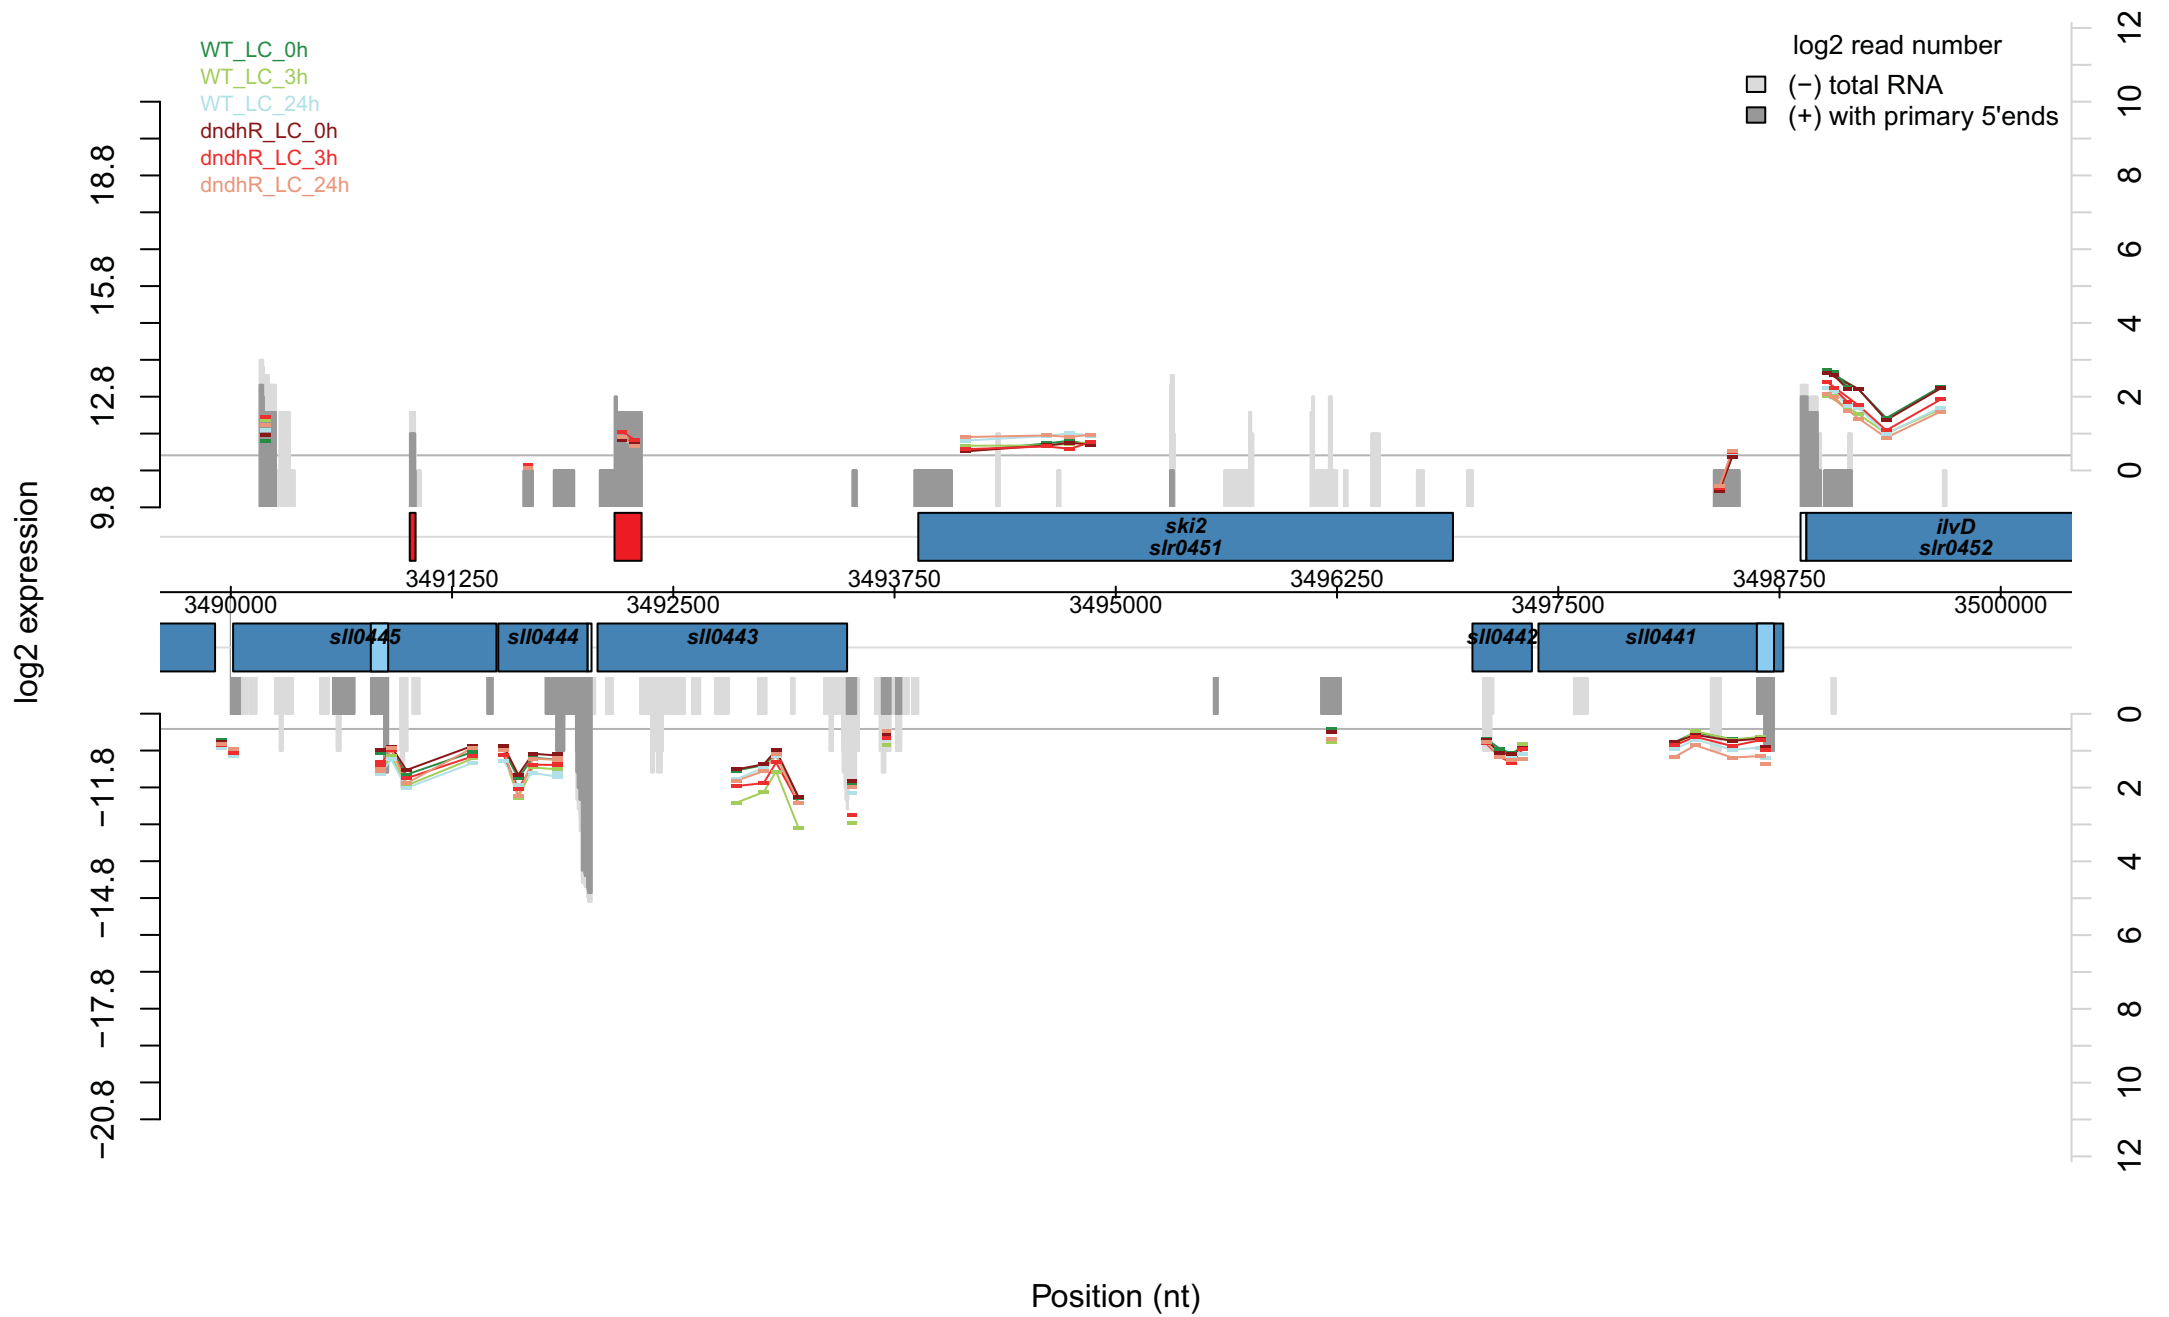

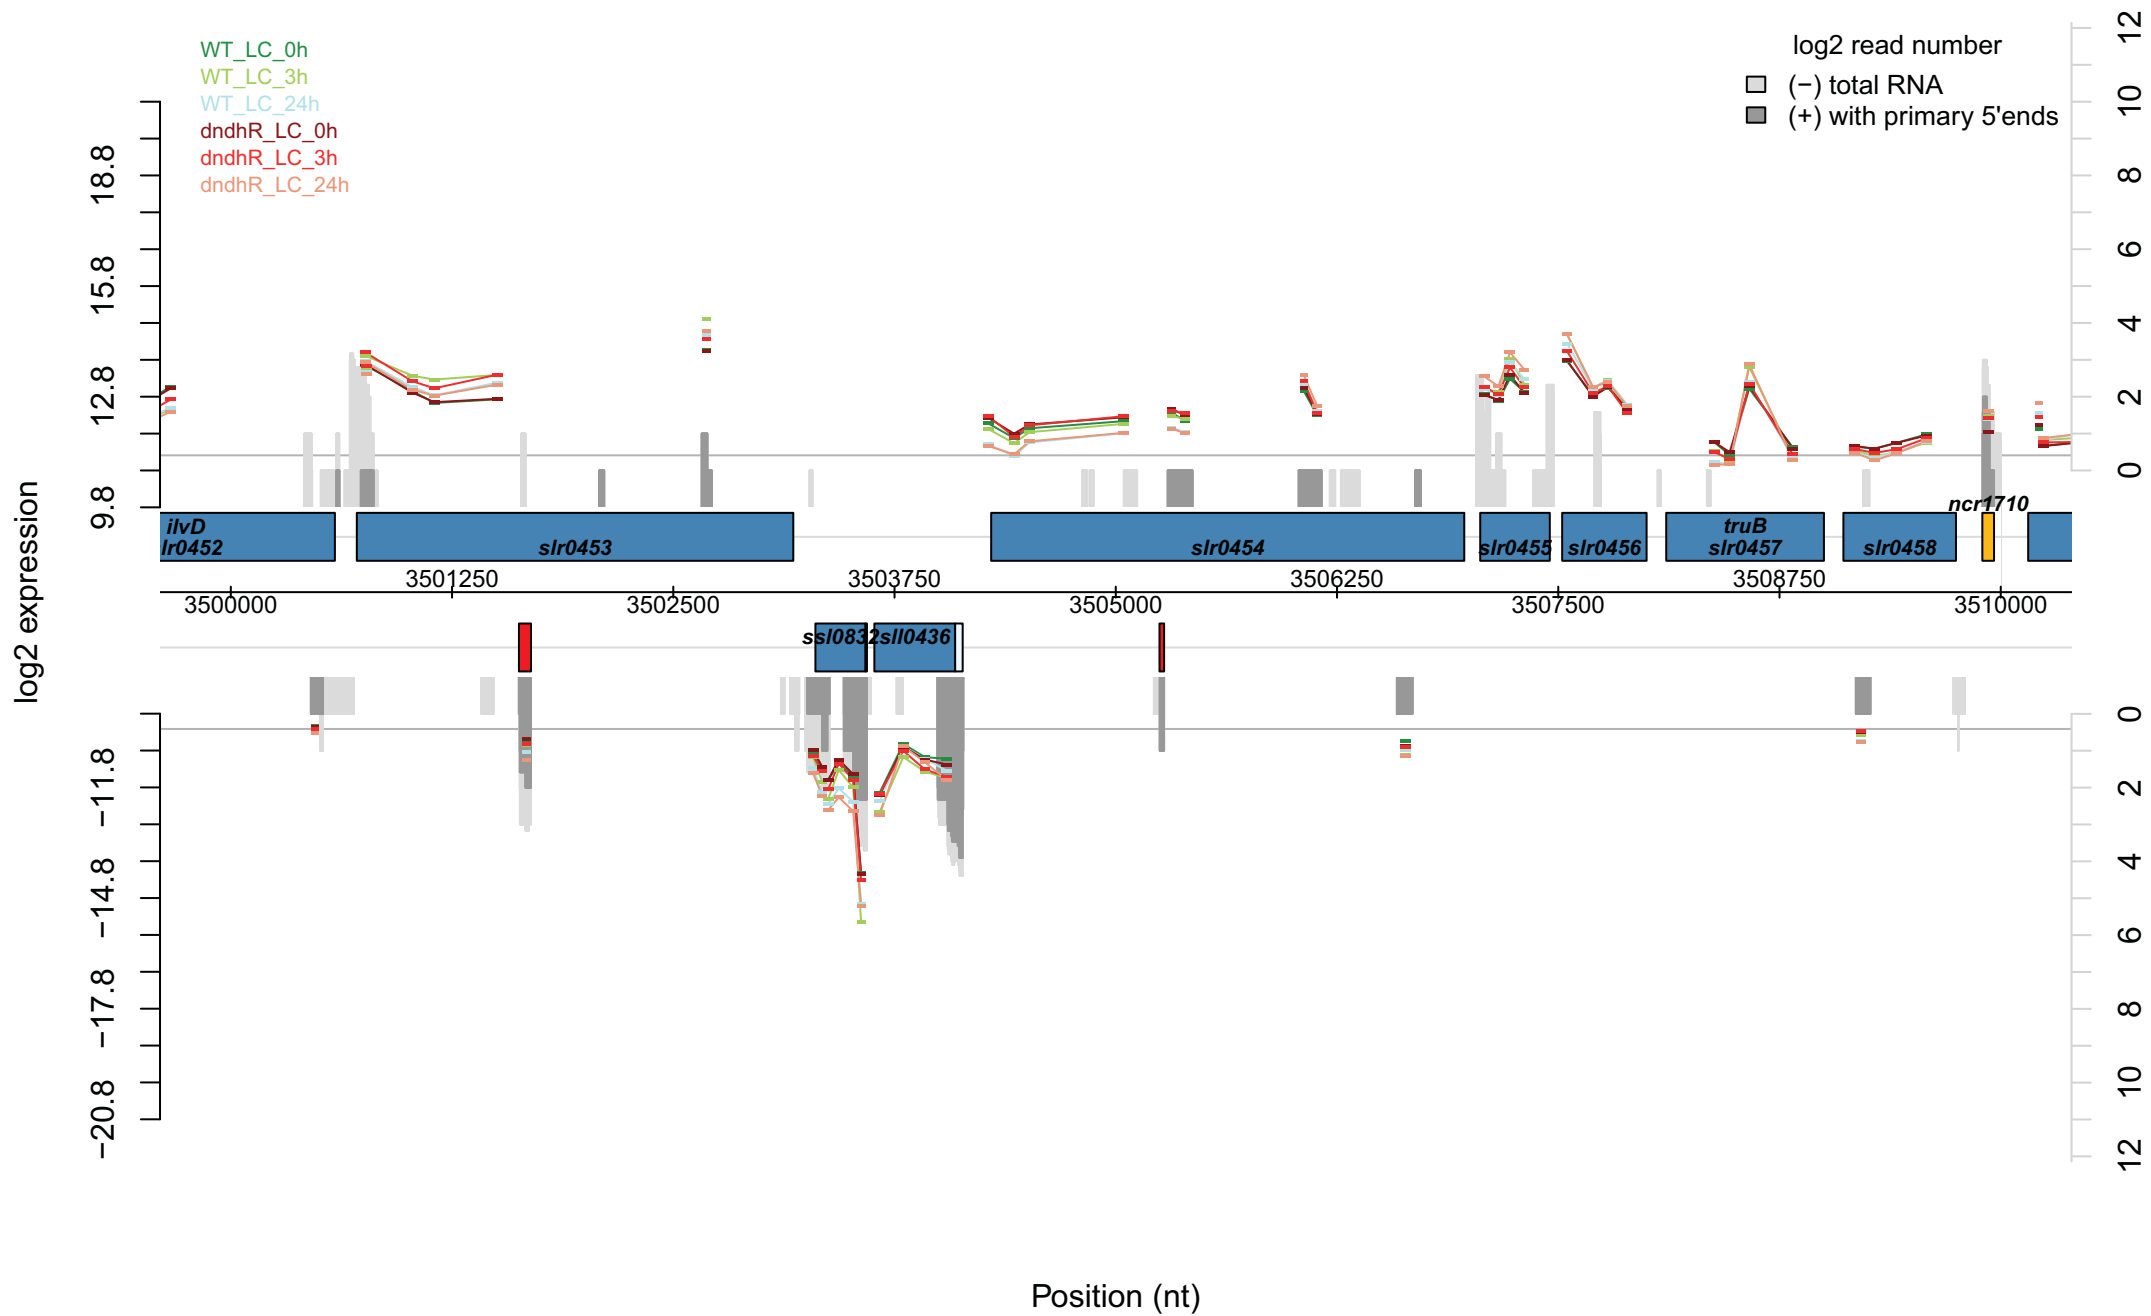

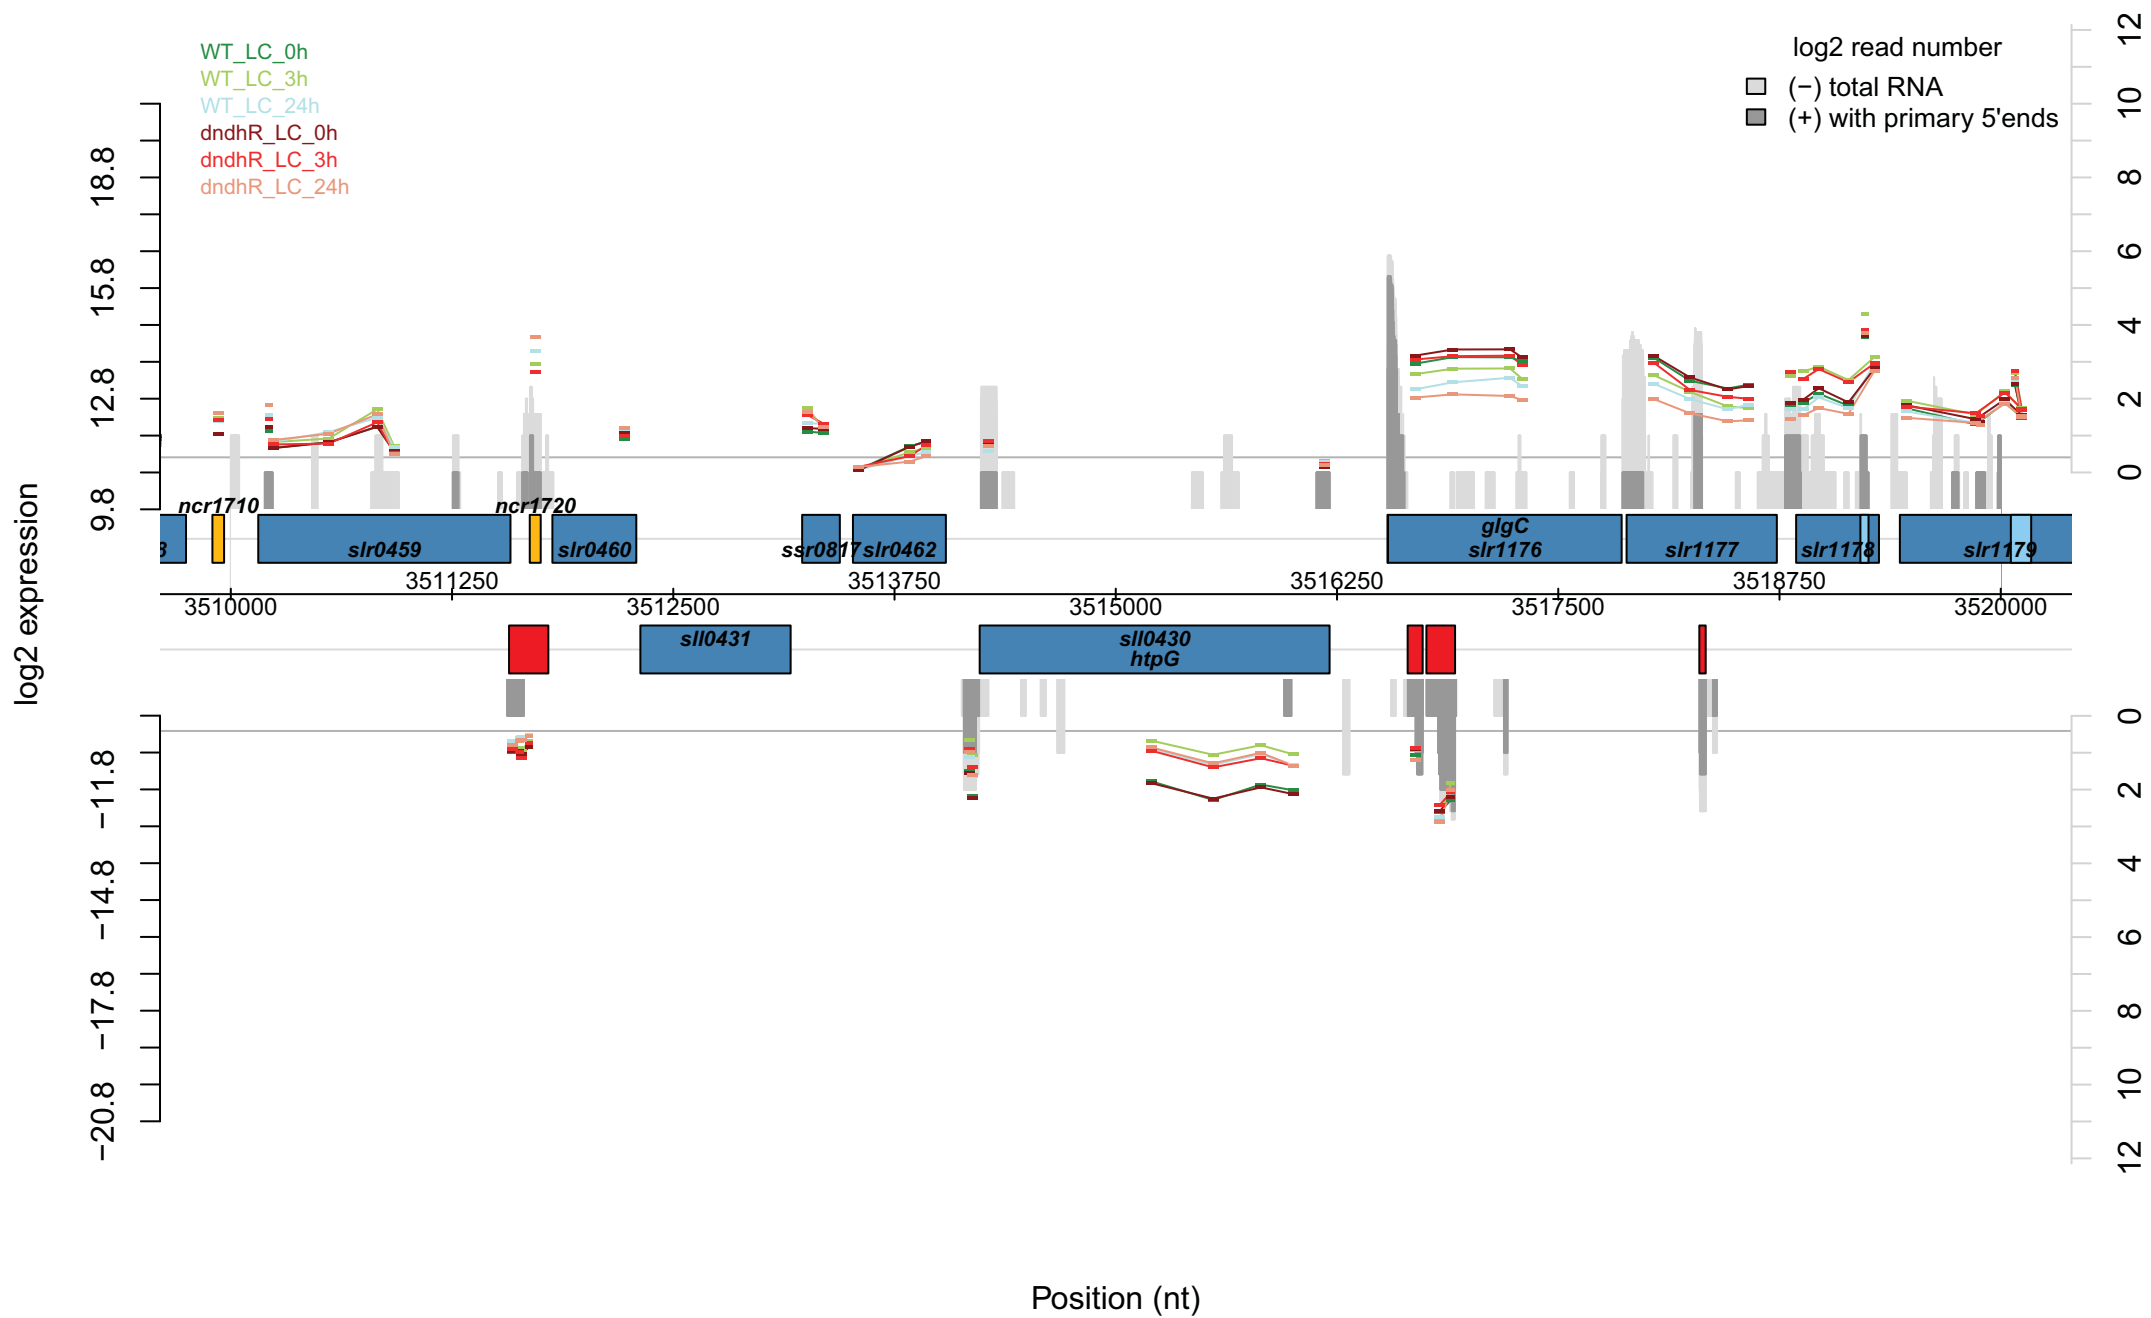



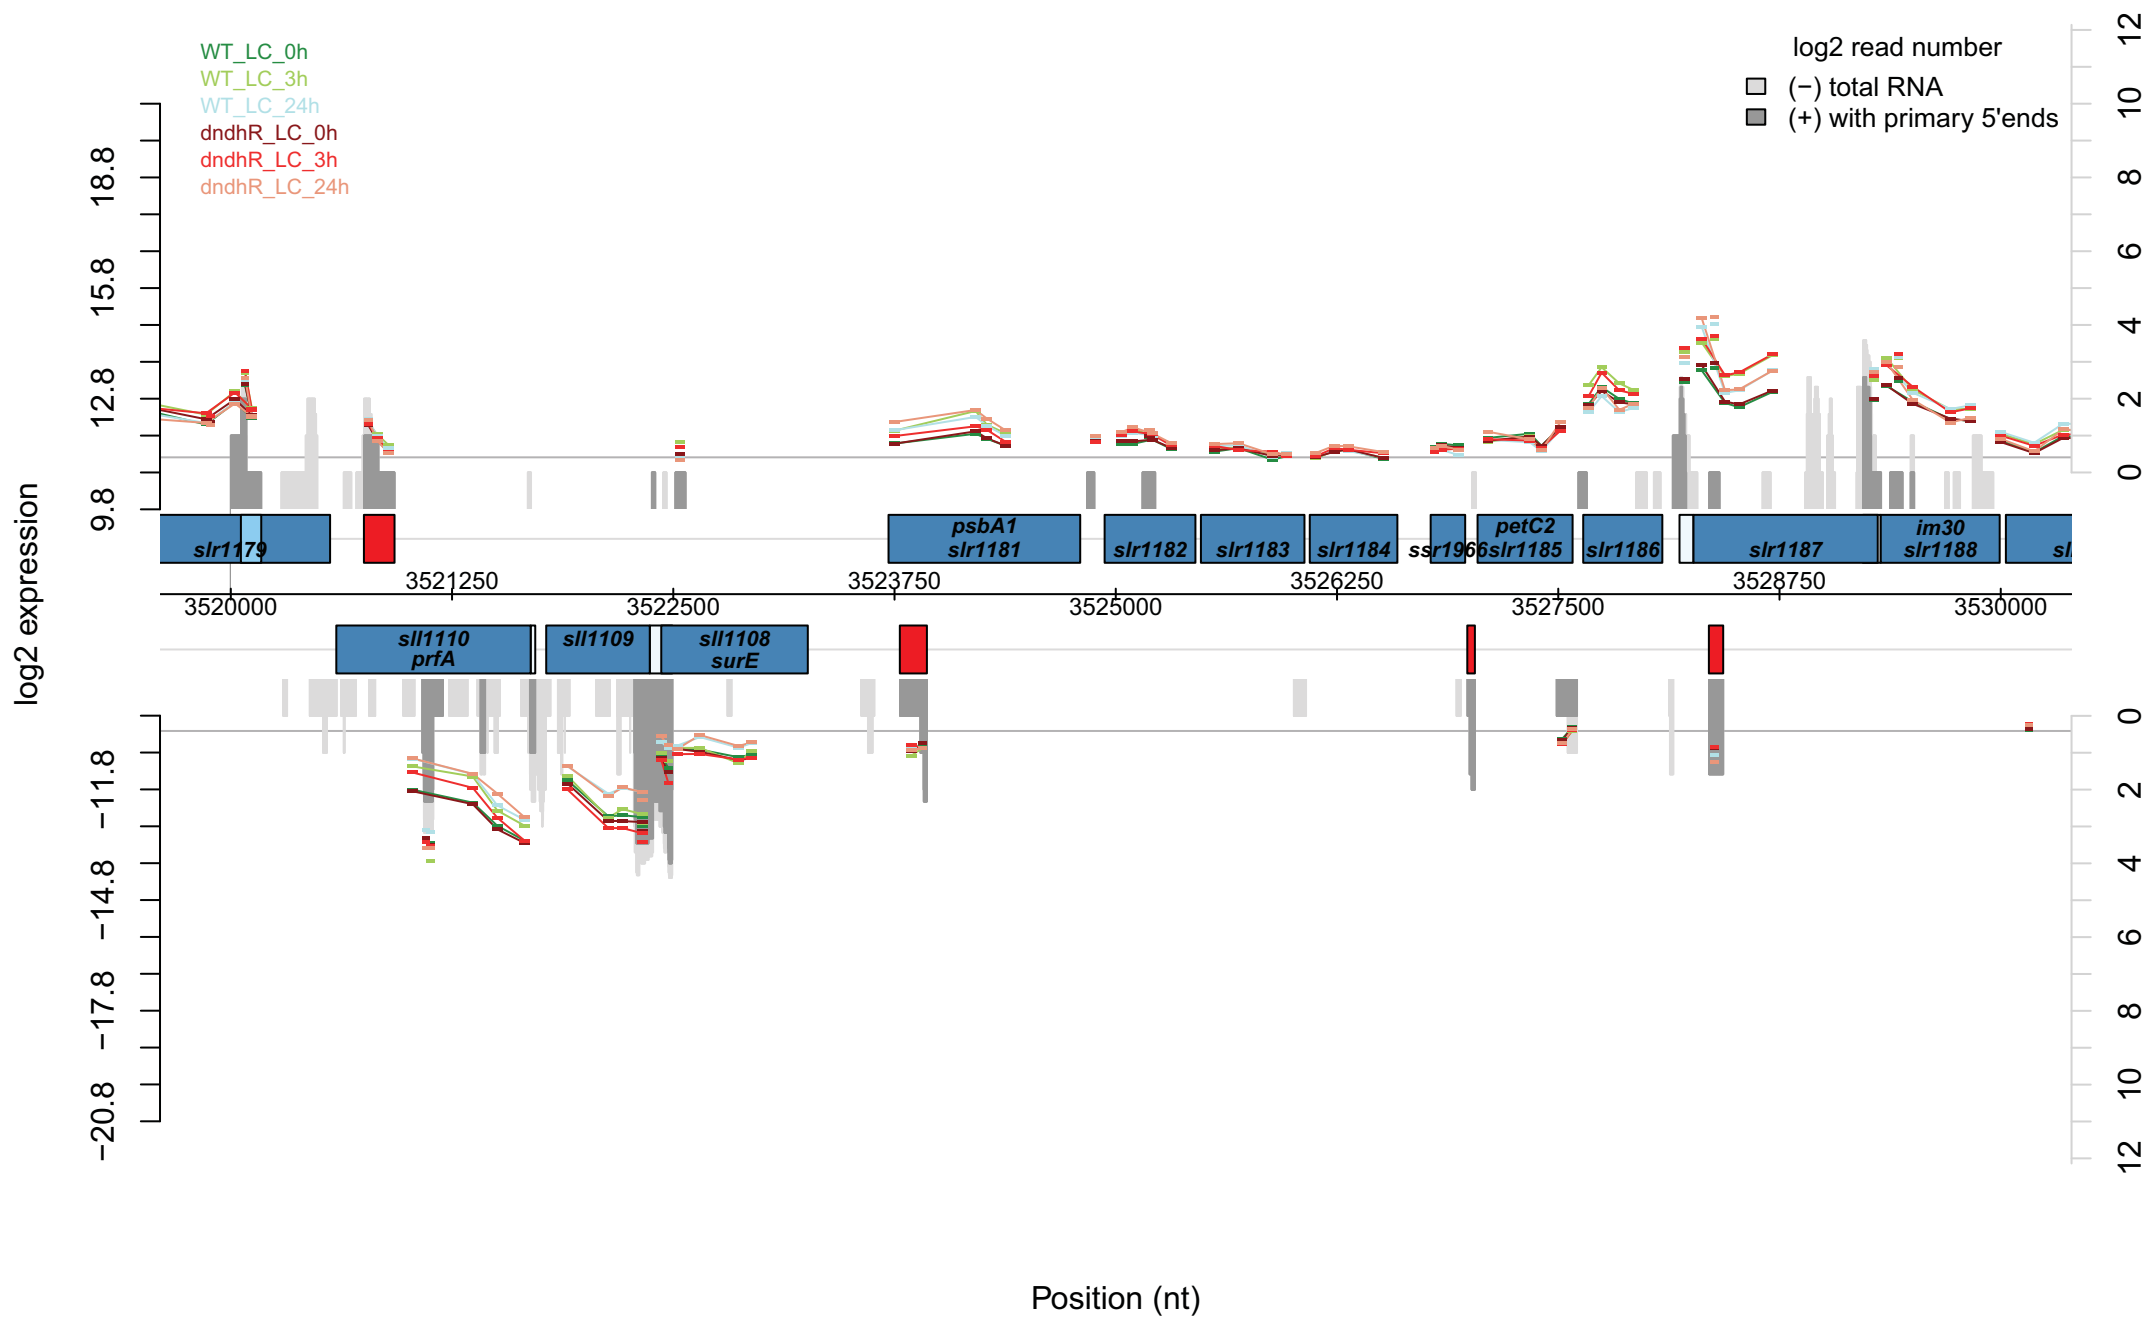

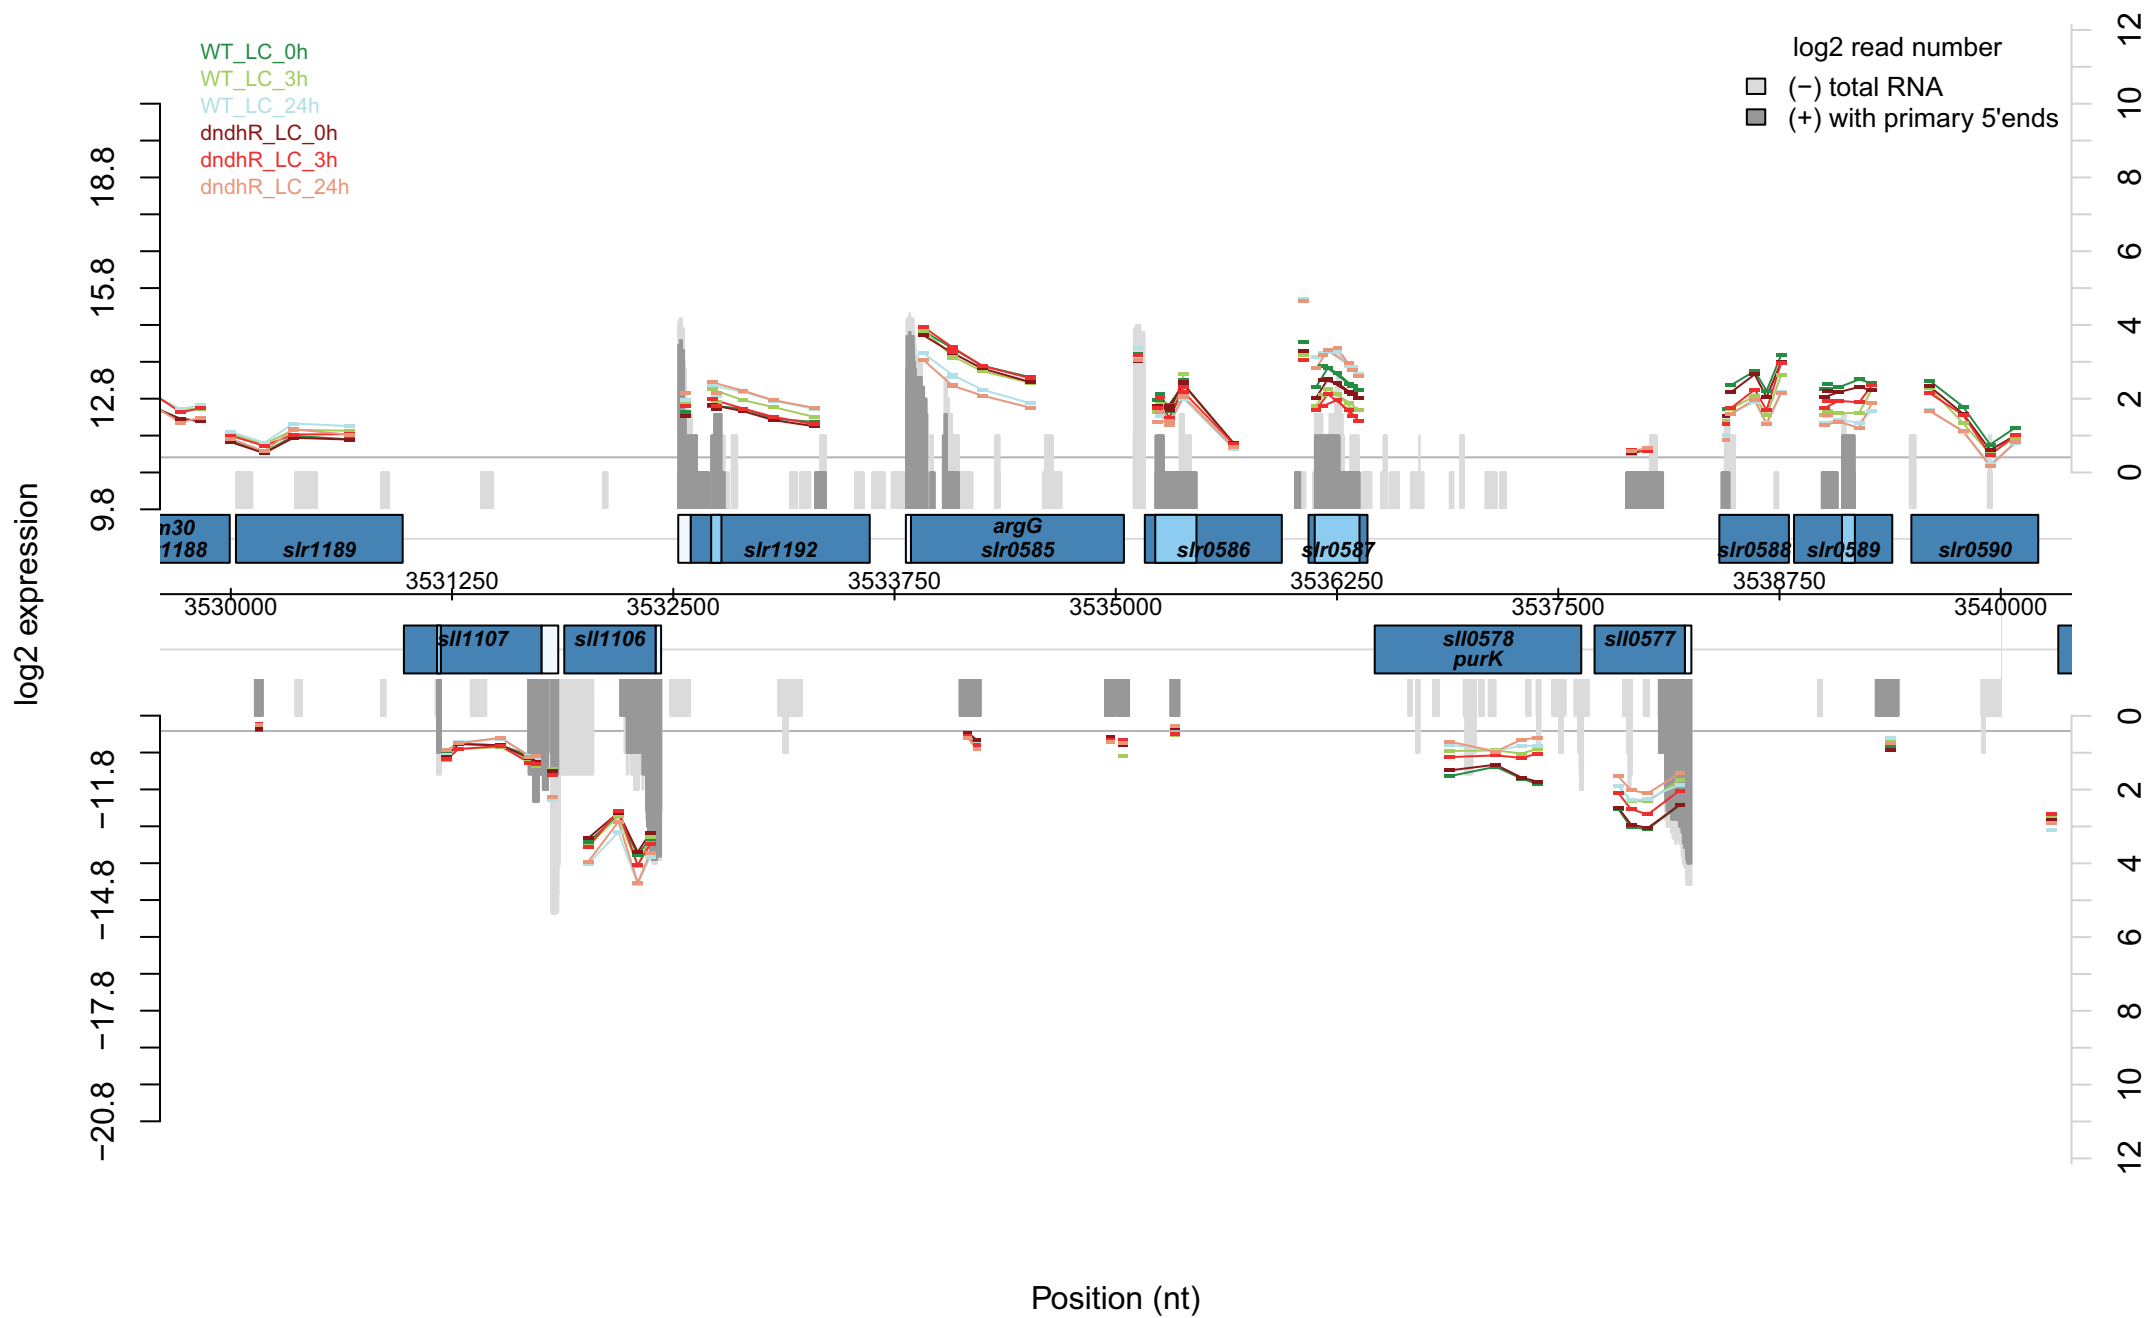

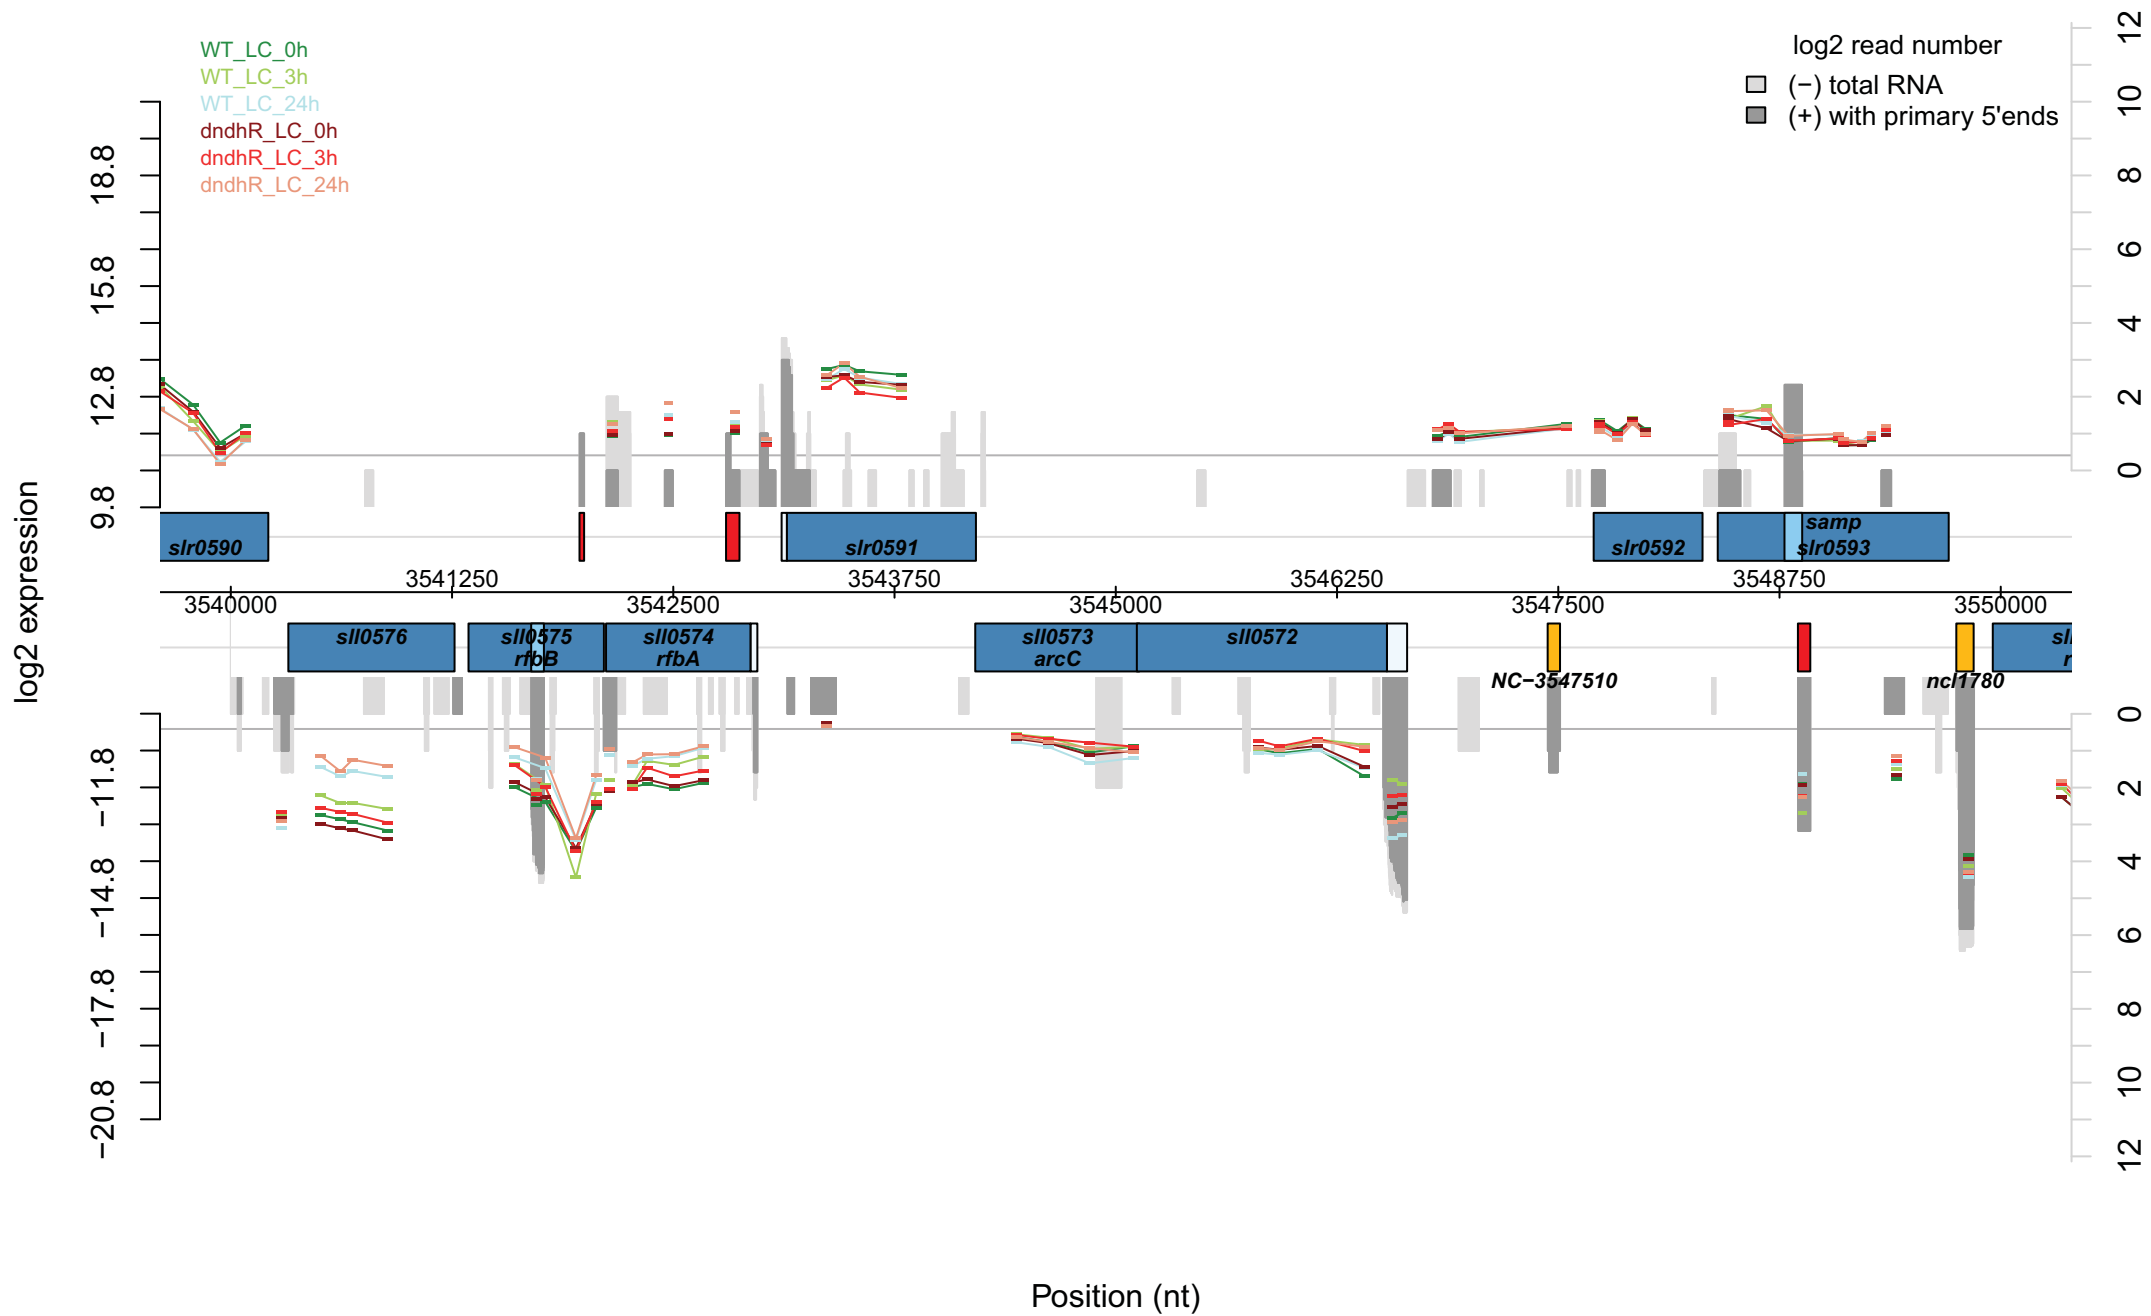

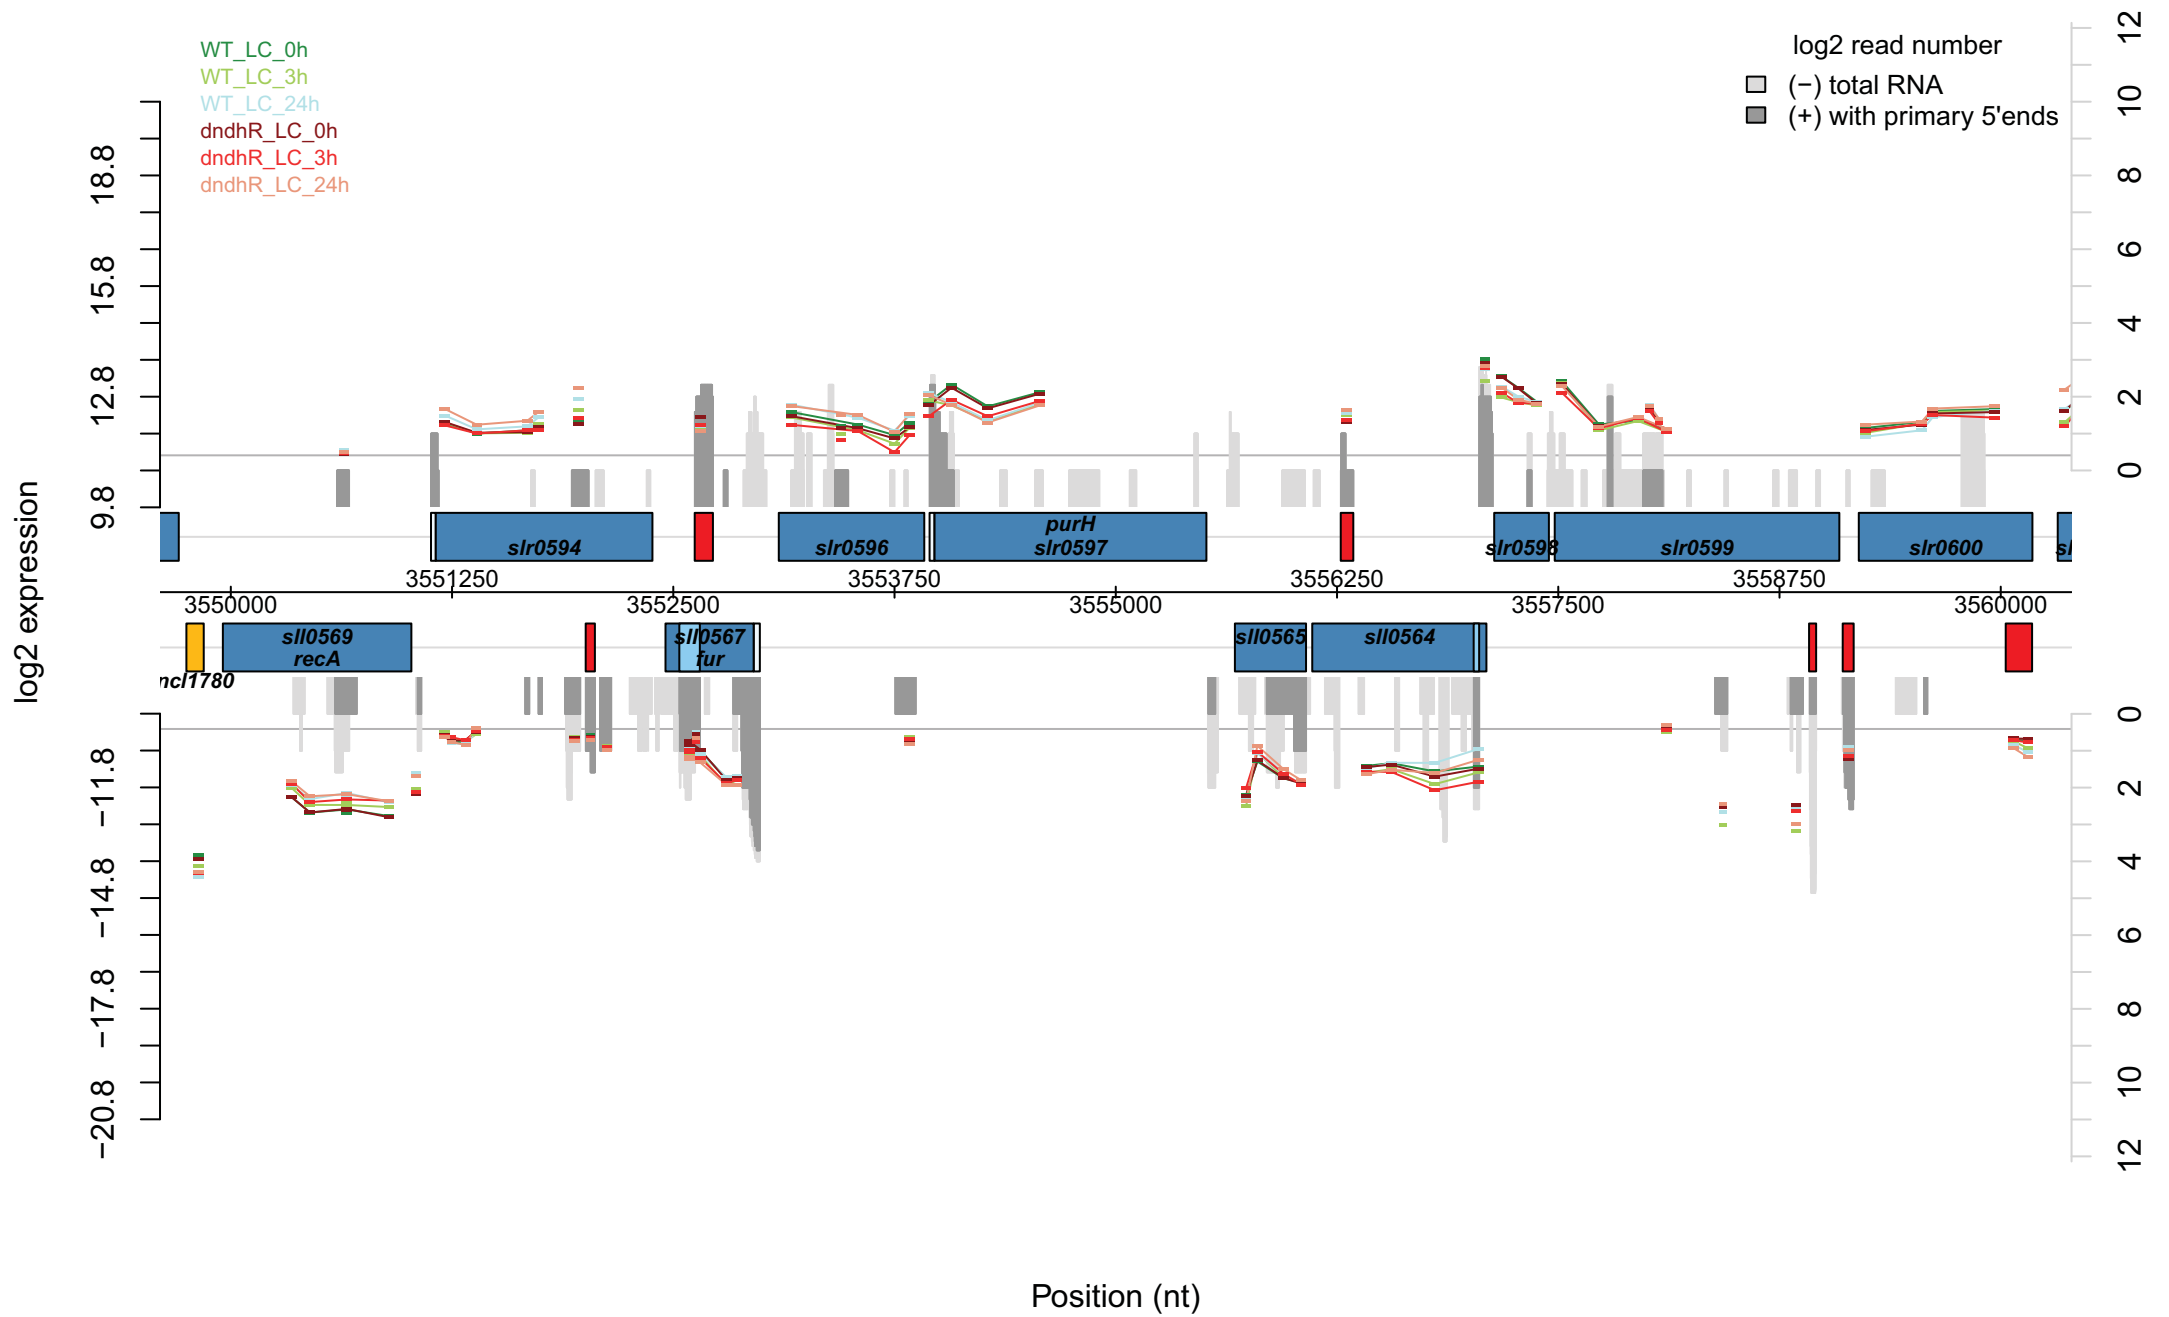

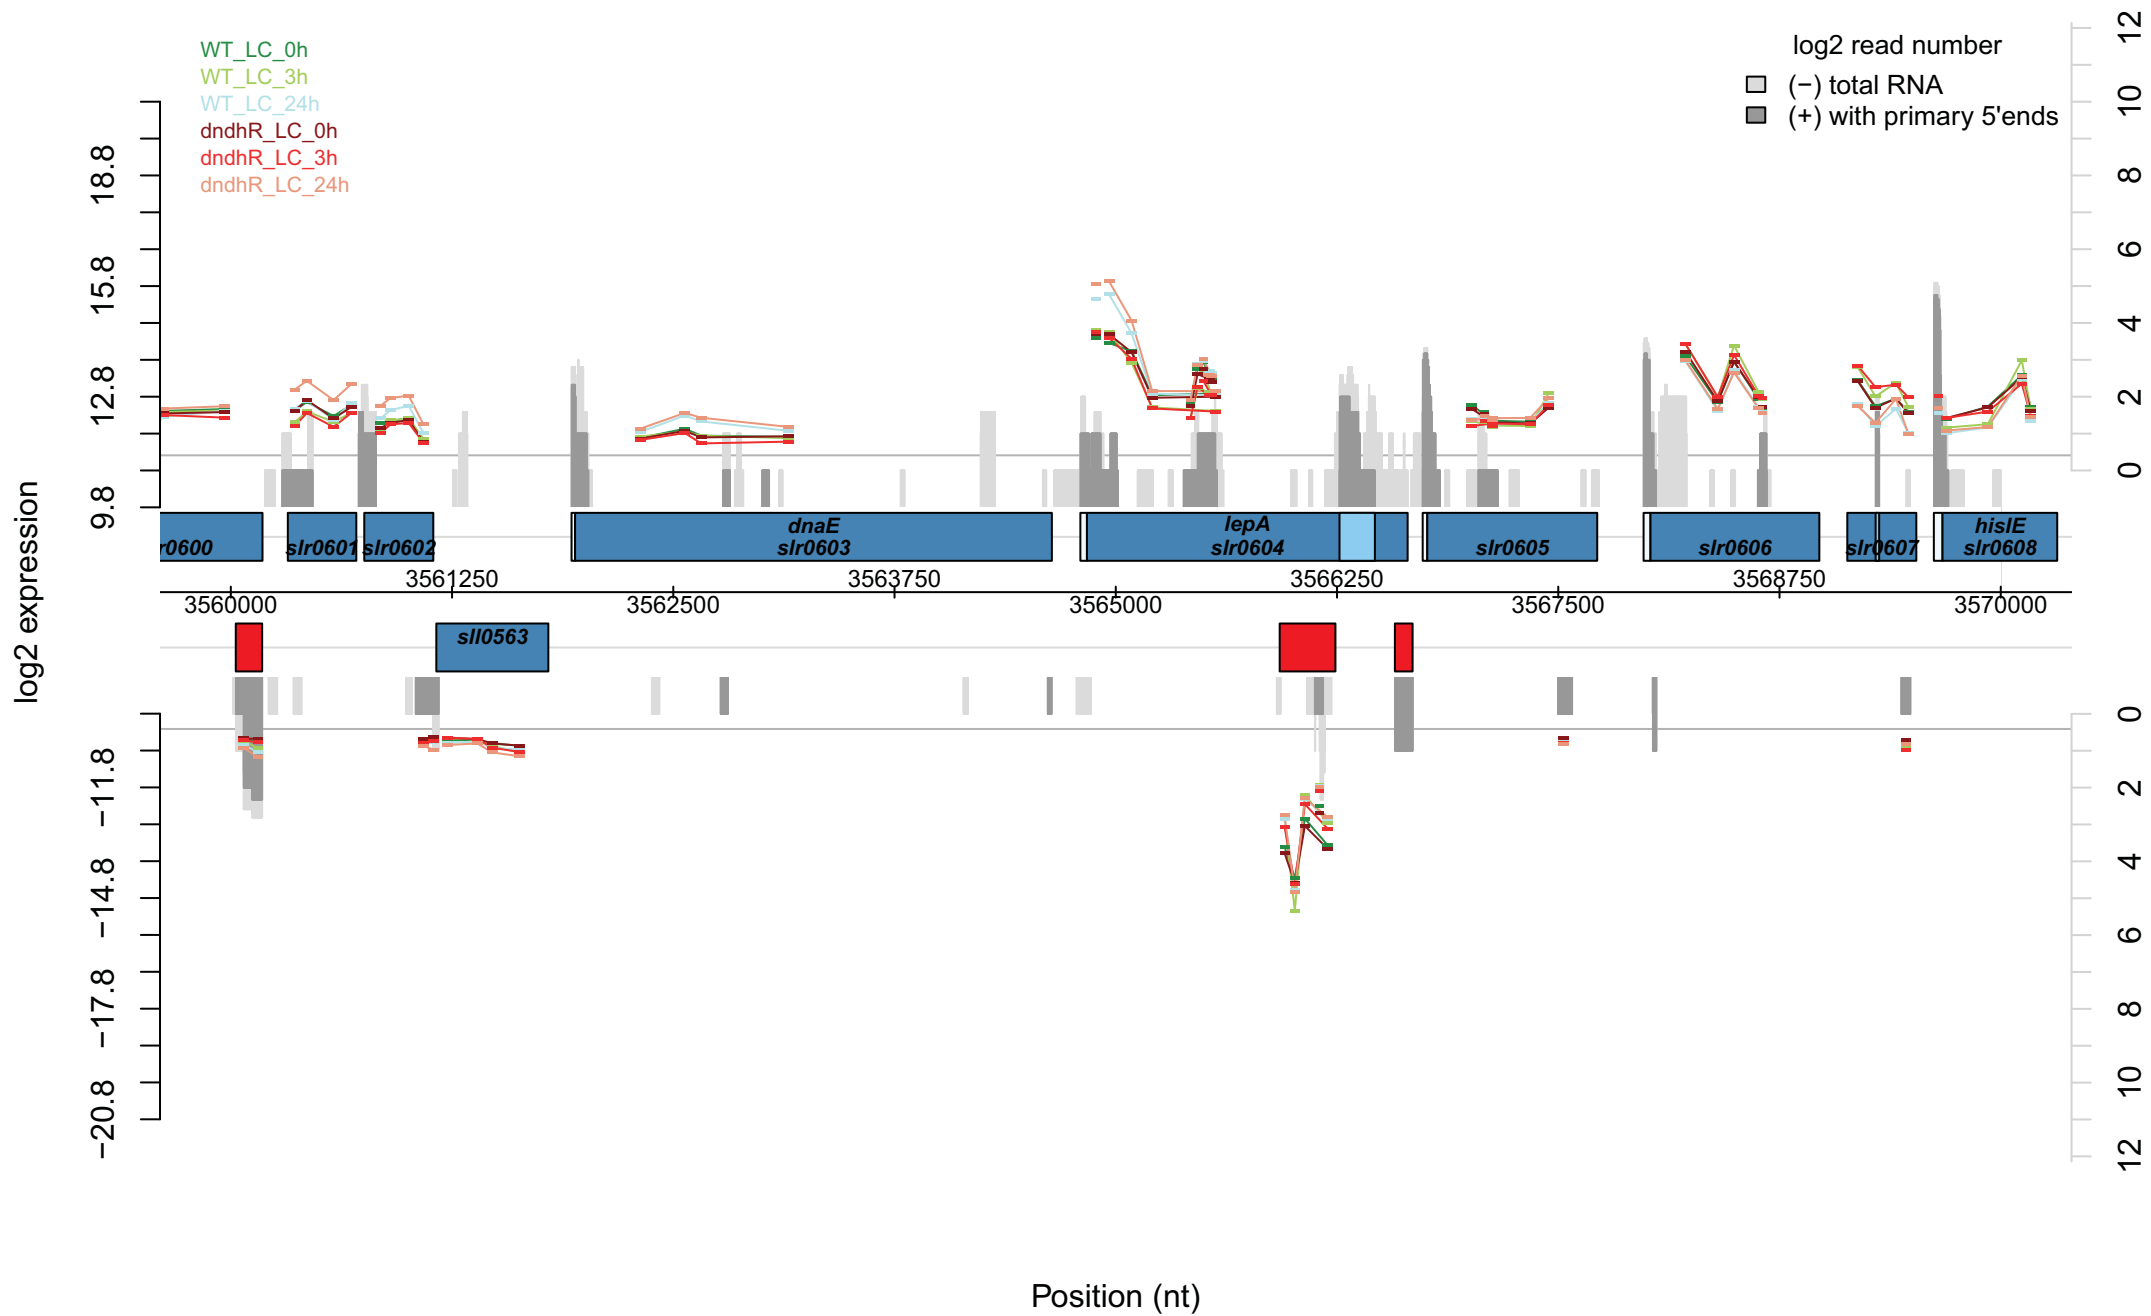

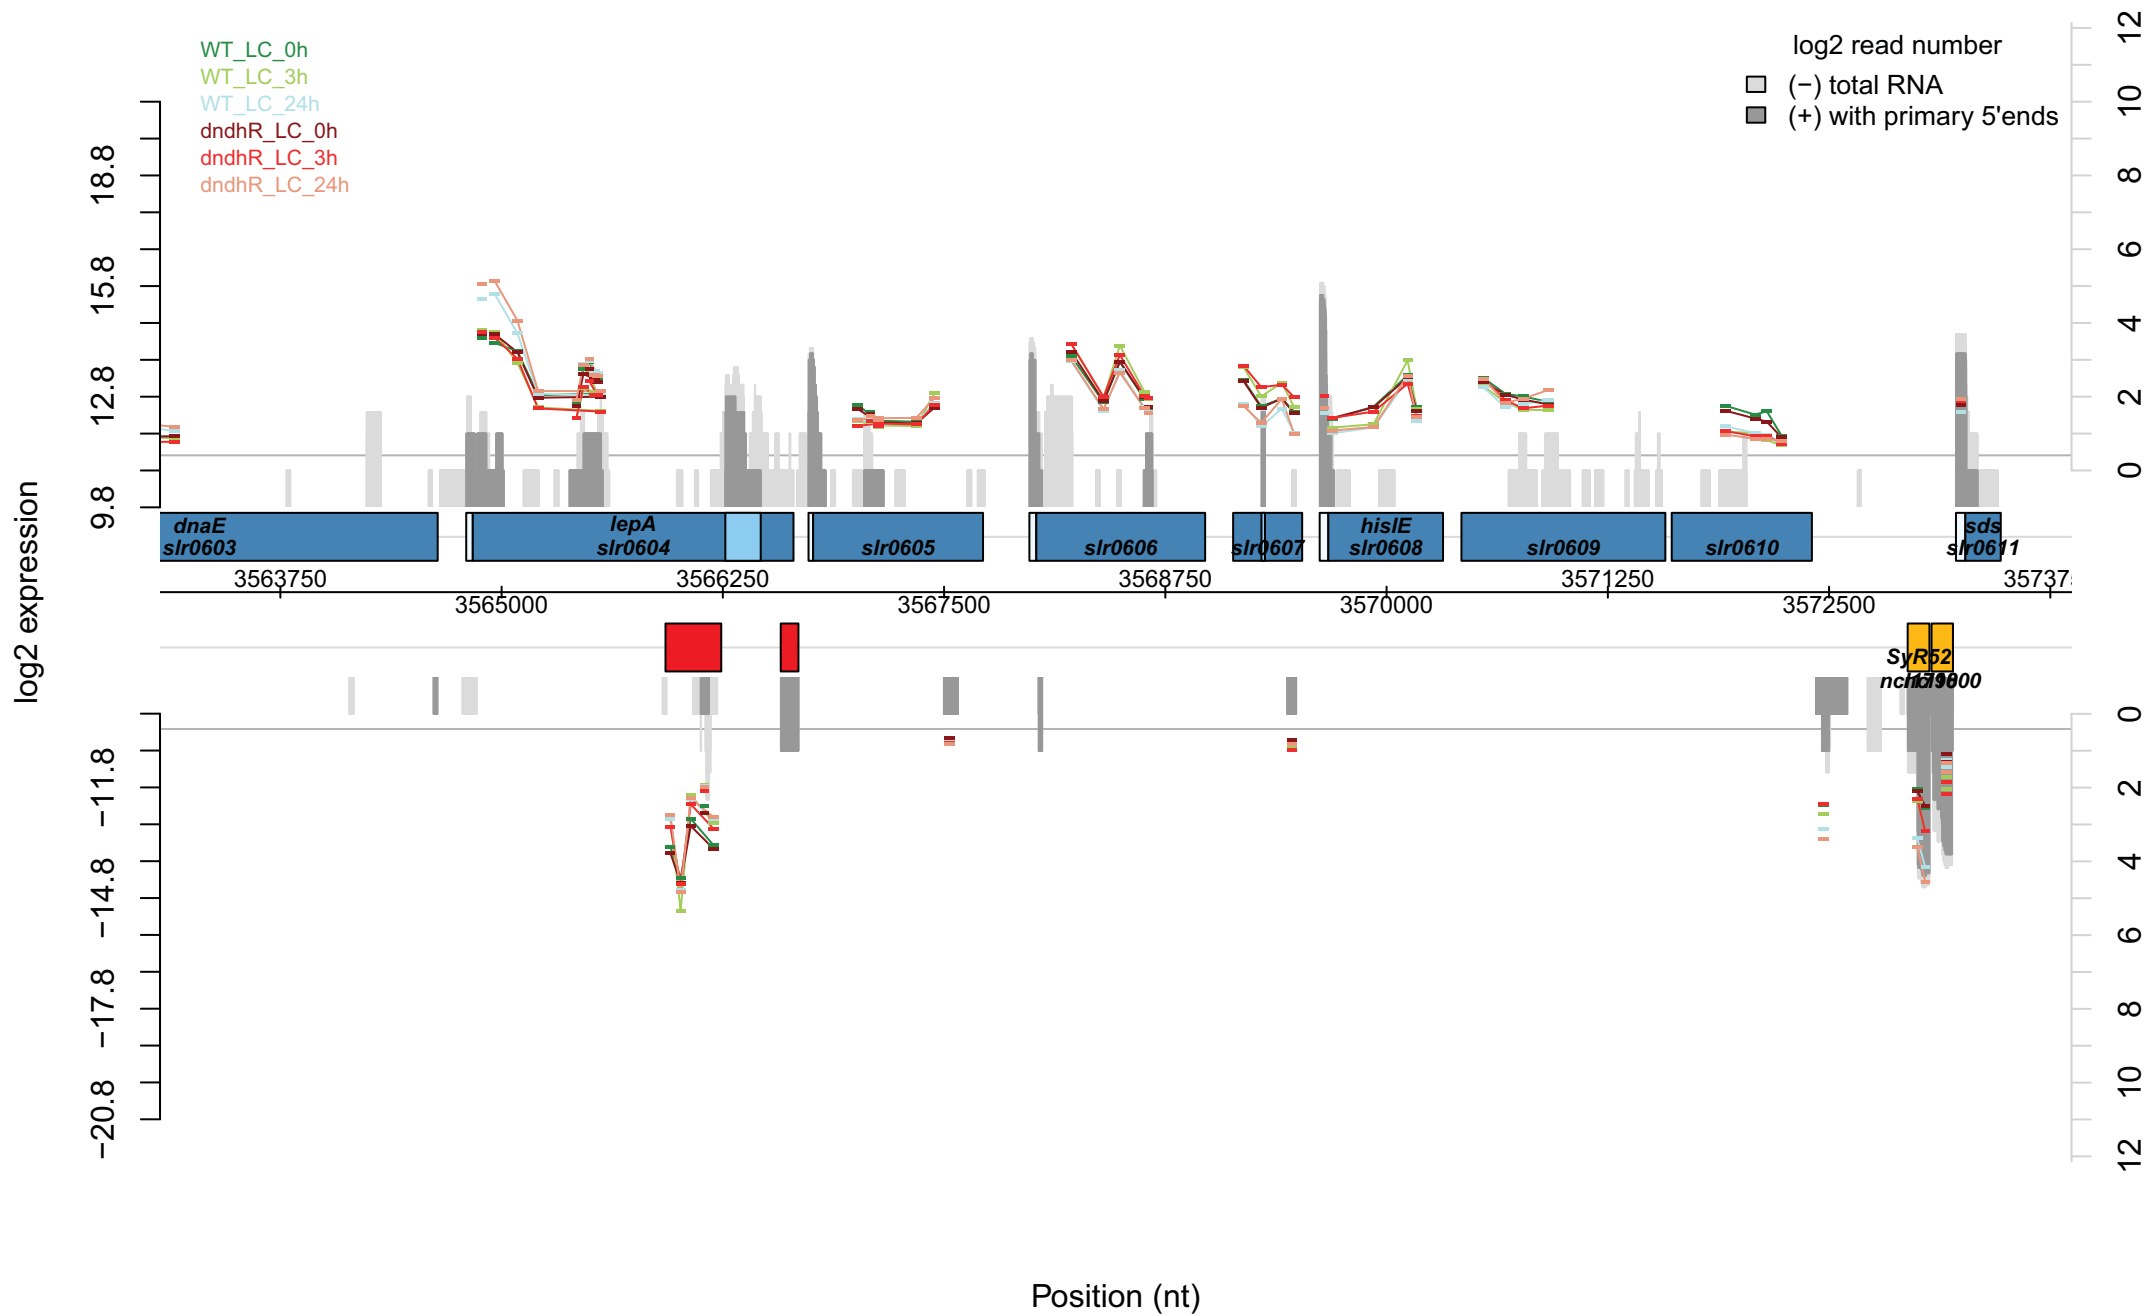

Supplement: supp_pp.114.254045_254045Supplementary_dataset_1.pdf [file supp_pp.114.254045_254045Supplementary_dataset_1.pdf]

**A**

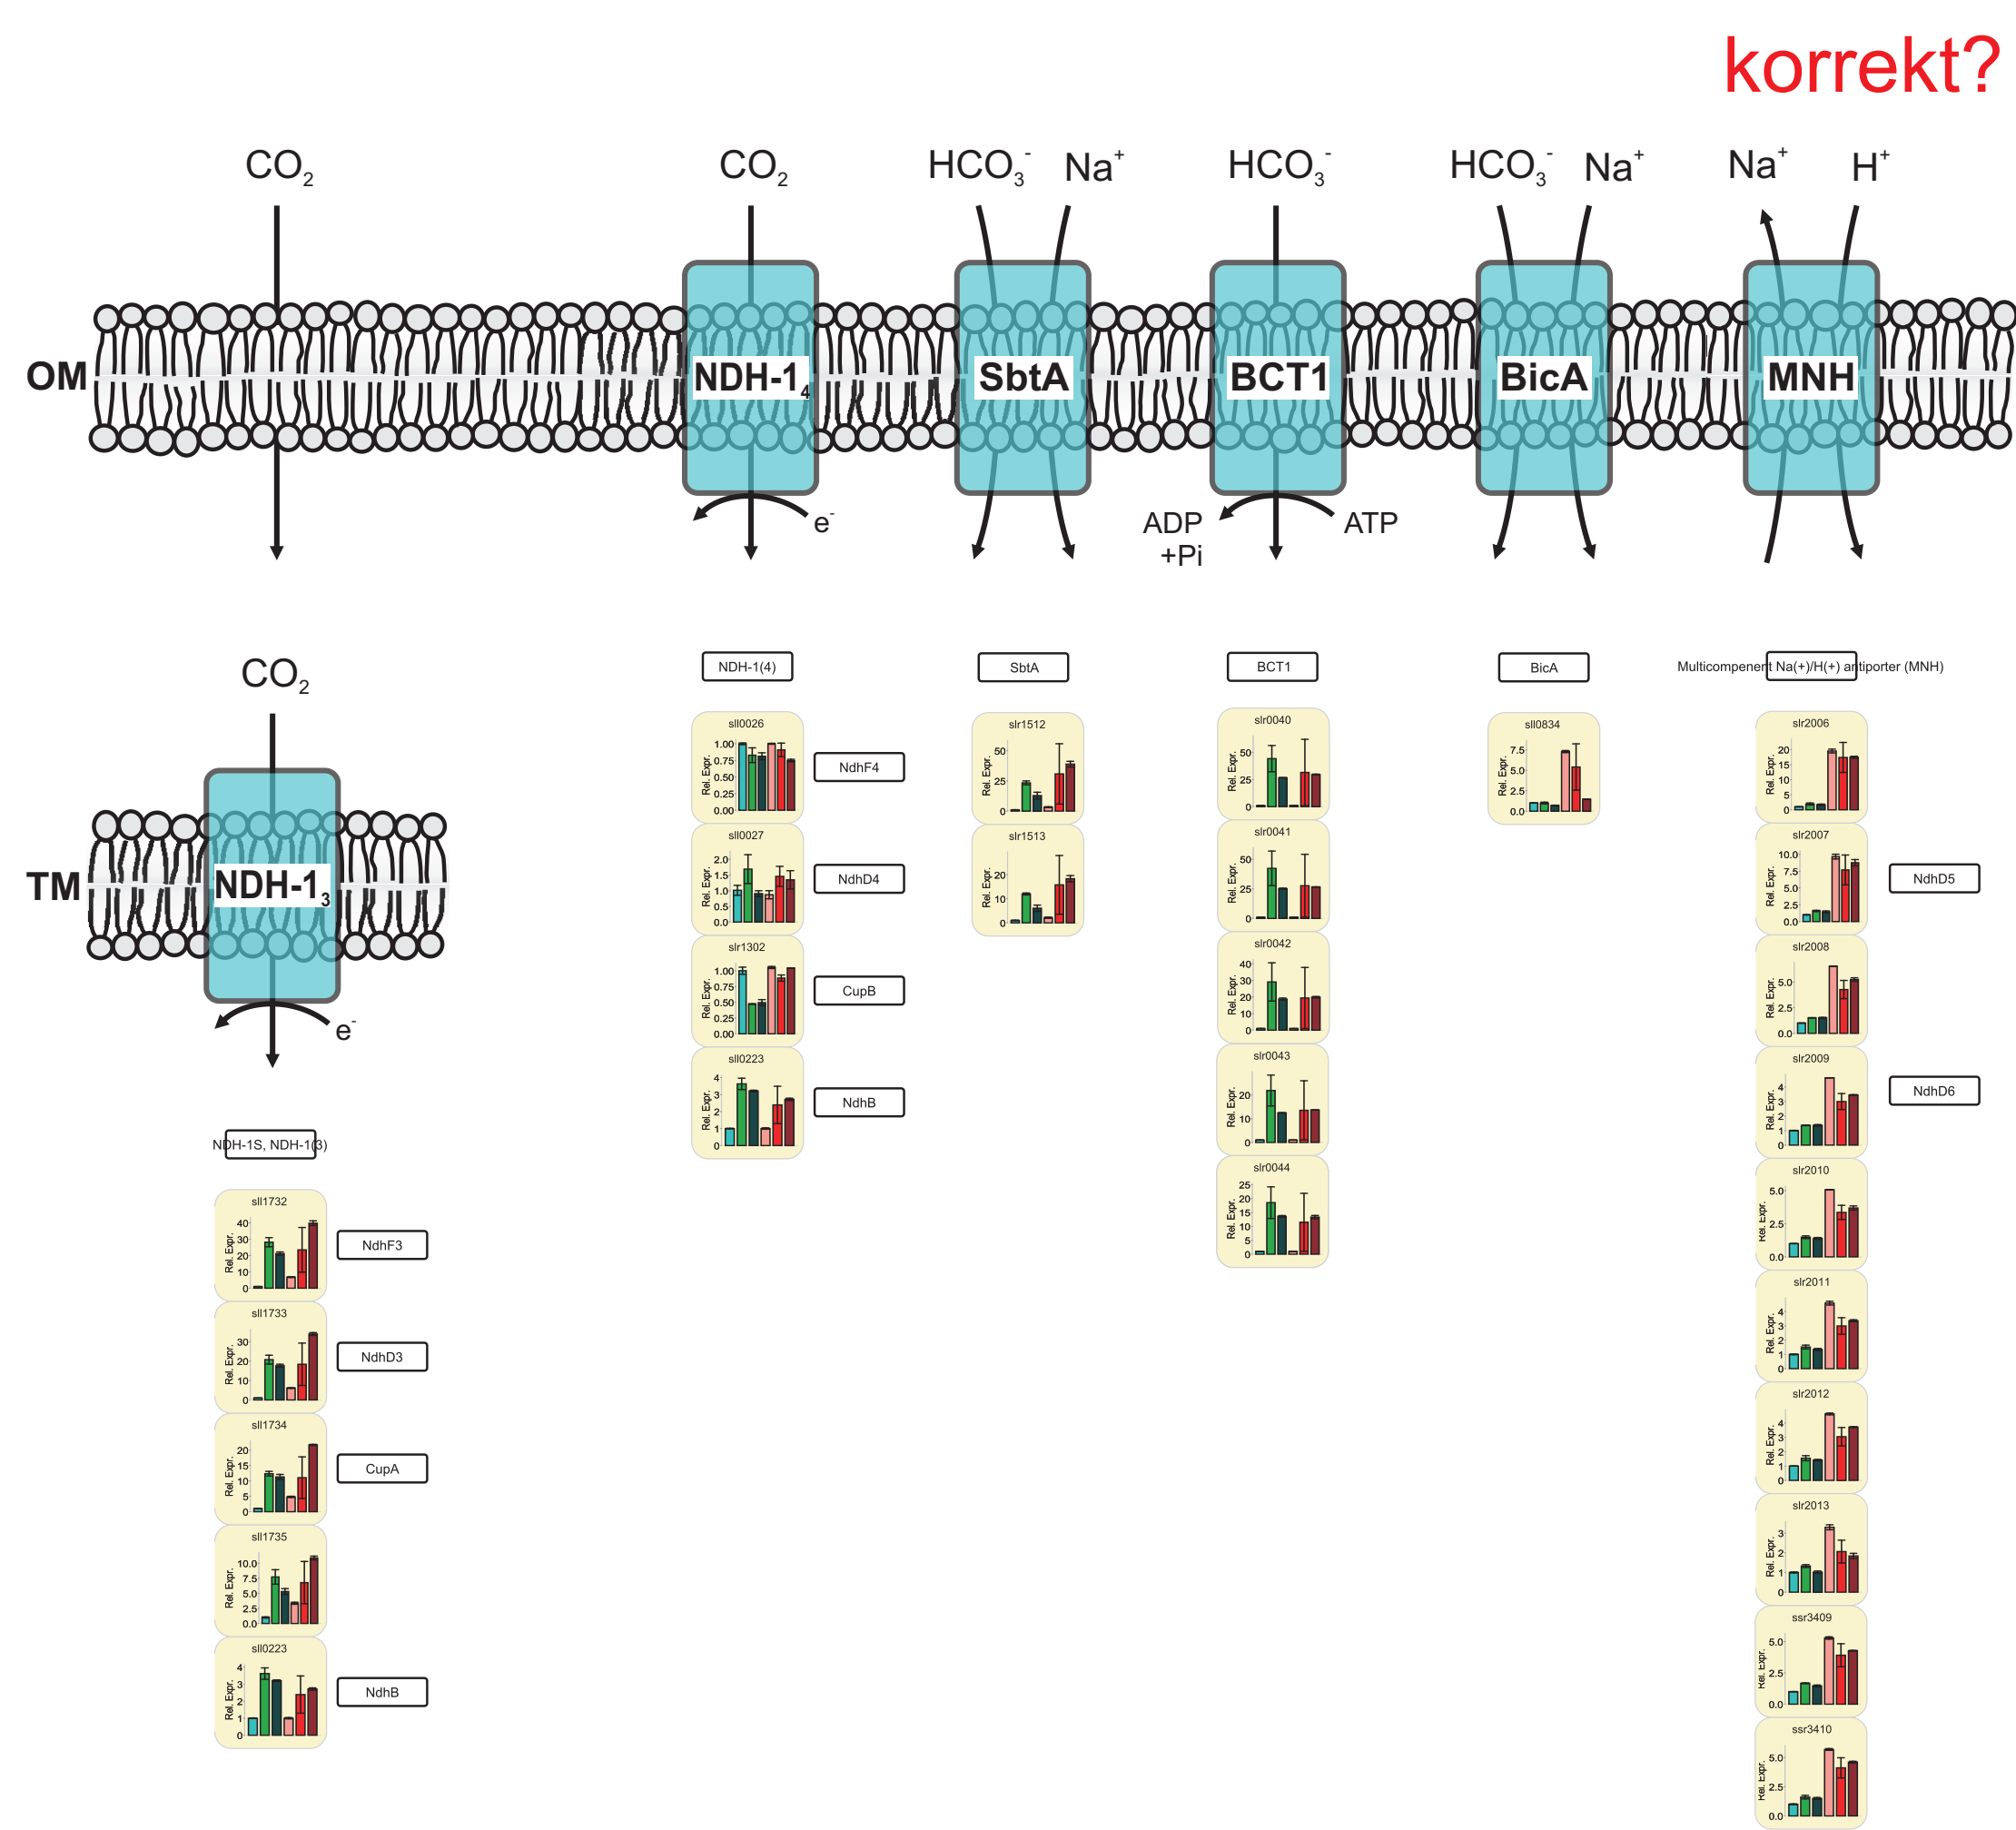

**Carbon uptake mechanisms + Ci Homeostase**

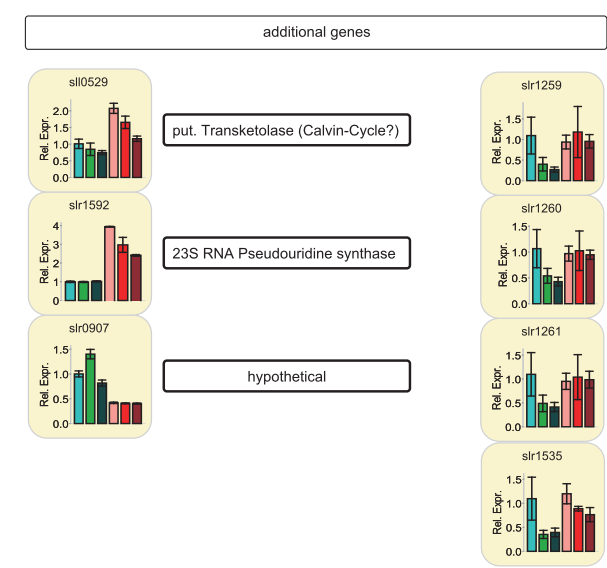

**B**

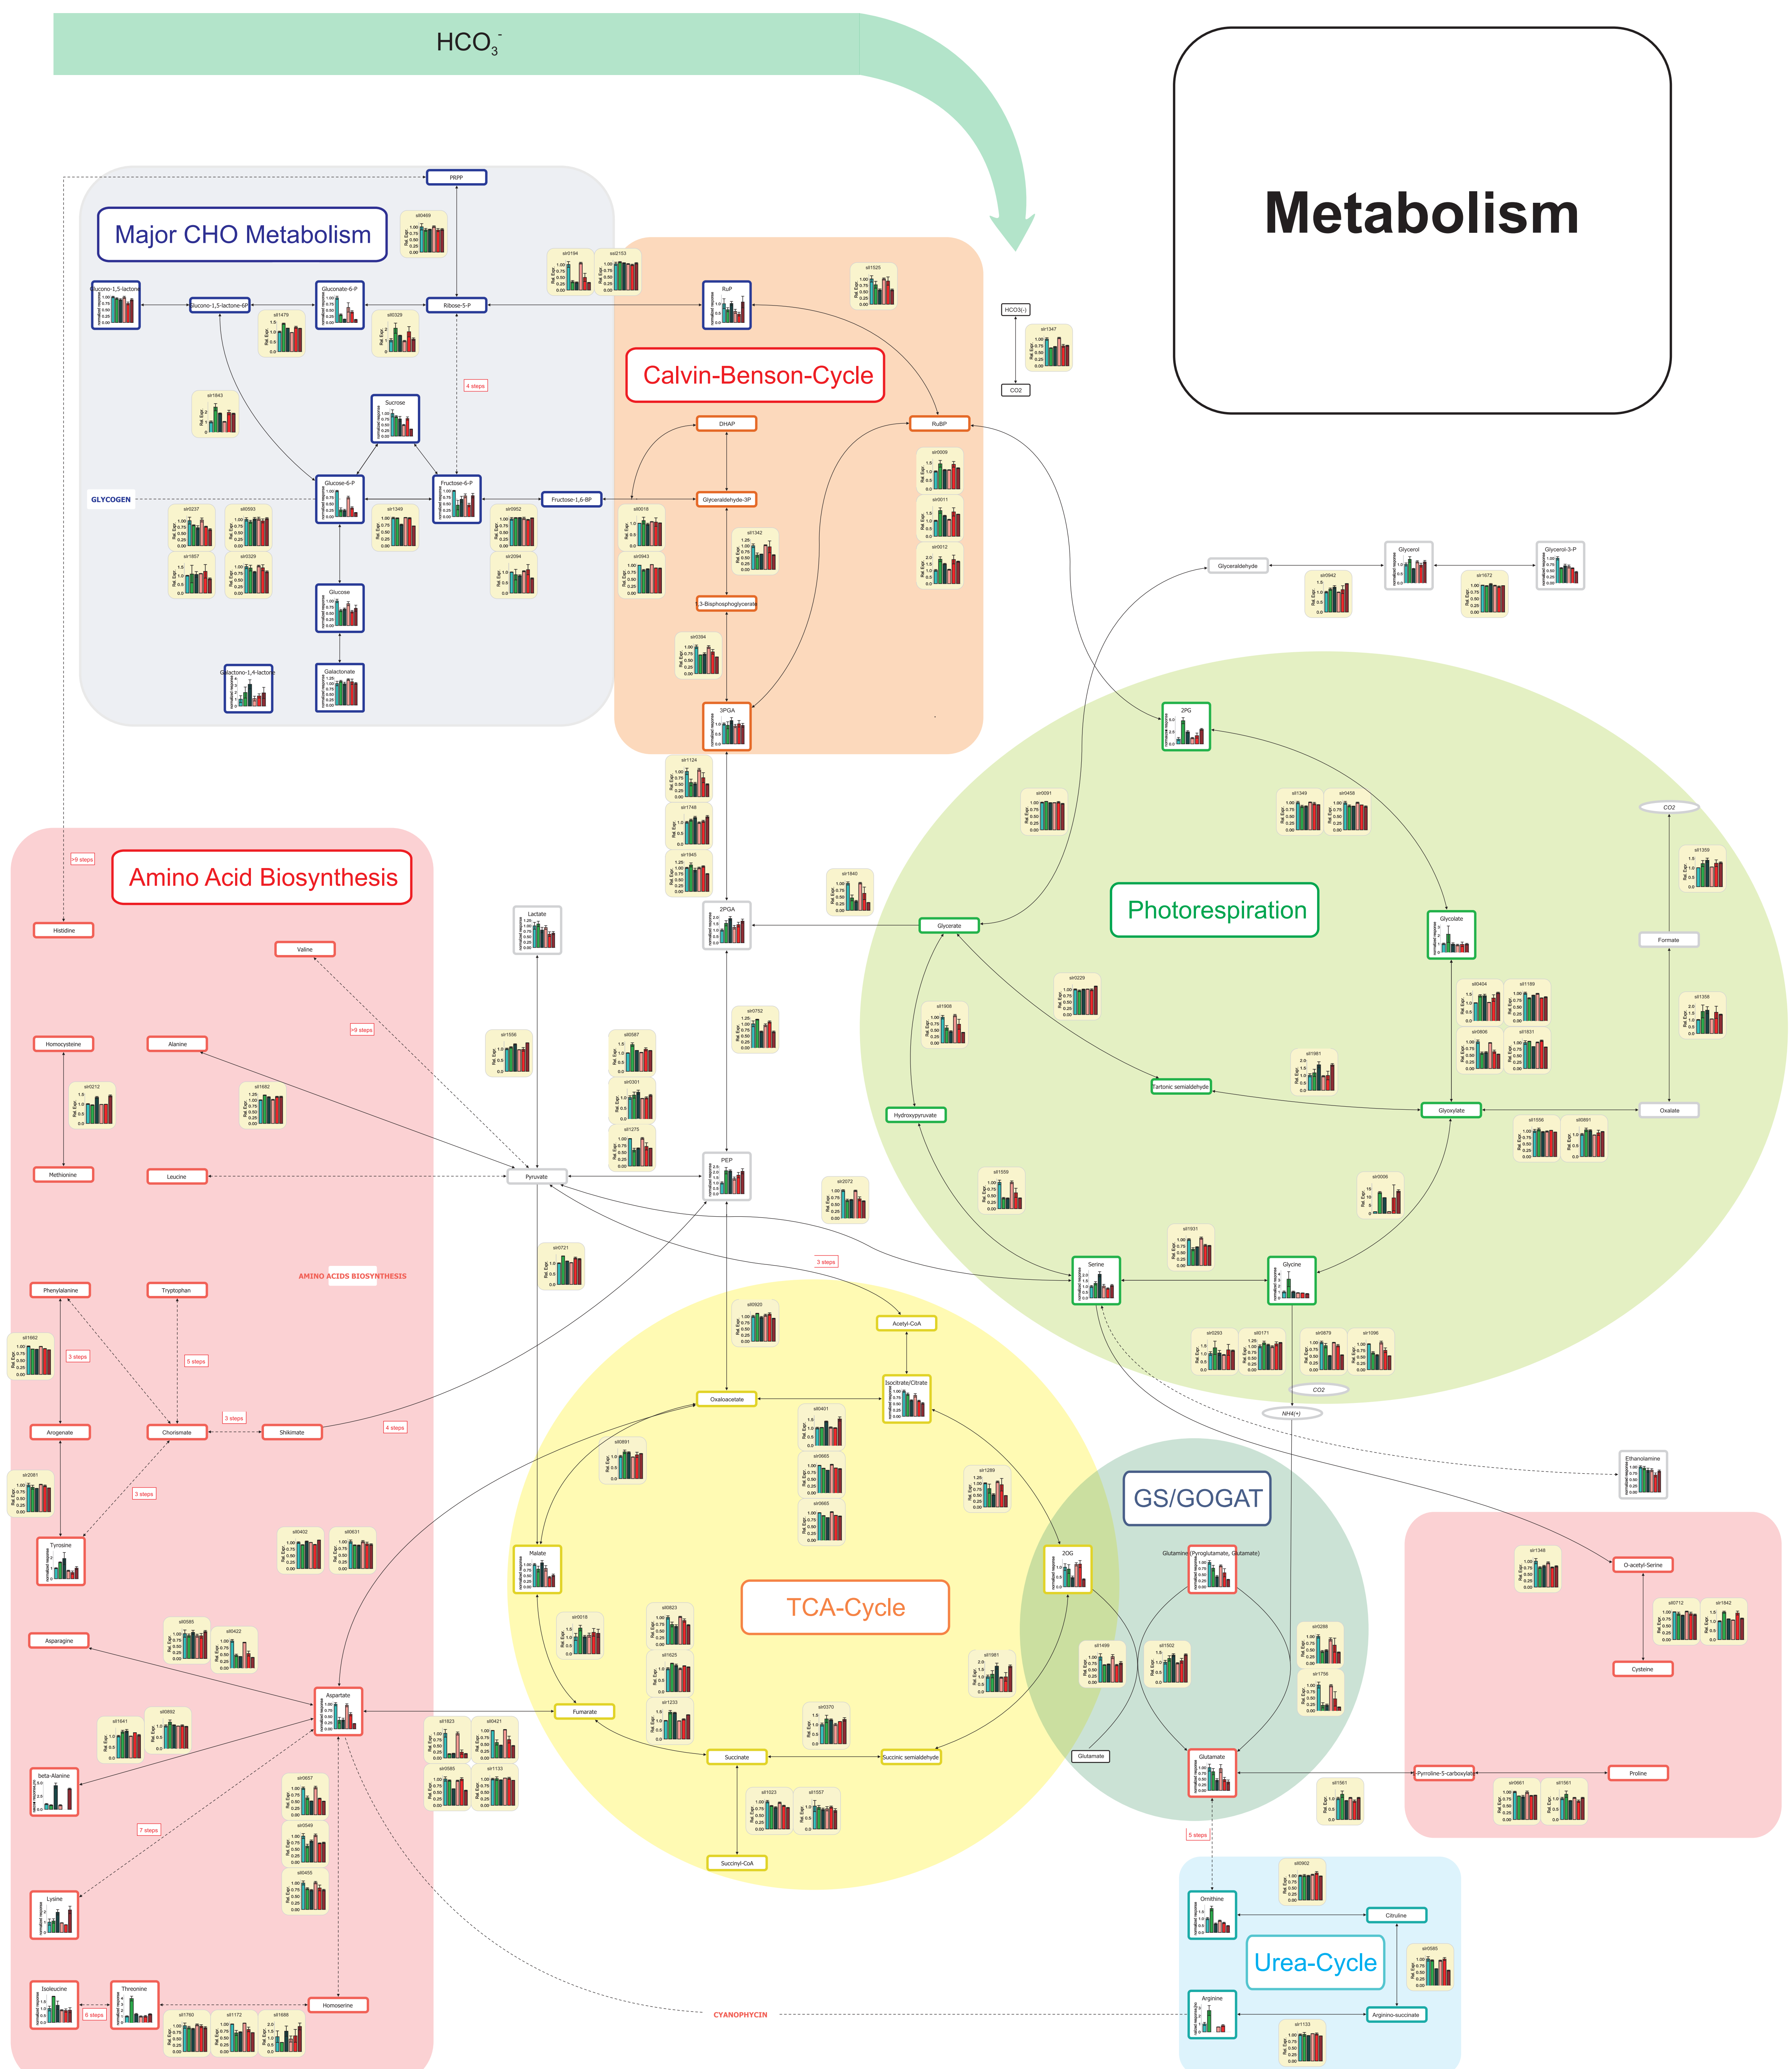

**Metabolism**

Supplement: supp_pp.114.254045_254045Supplementary_dataset_2.pdf [file supp_pp.114.254045_254045Supplementary_dataset_2.pdf]
